# Supplementary material for: Proteomic analysis of dietary restriction in yeast reveals a role for Hsp26 in replicative lifespan extension
Source: Biochem J. 2021 Dec 16;478(24):4153–67. doi: 10.1042/BCJ20210432 (PMC8786290; doi:10.1042/BCJ20210432)
Supplement: Supplementary Table S1 [file BCJ-478-4153-s2.pdf]

## Sheet: MS data
Supplementary Table 1, Campion et al: raw MS data						Normalized abundance								Raw abundance
						Wild Type 2% glucose				Wild Type 0.05% glucose				Wild Type 2% glucose				Wild Type 0.05% glucose
Accession	Peptide count	Unique peptides	Confidence score	Mass	Description	Expt 1	Expt 2	Expt 3	Expt 4	Expt 1	Expt 2	Expt 3	Expt 4	Expt 1	Expt 2	Expt 3	Expt 4	Expt 1	Expt 2	Expt 3	Expt 4
P00724	14	14	987.26	60715	Invertase 2 OS=Saccharomyces cerevisiae (strain ATCC 204508 / S288c) GN=SUC2 PE=1 SV=1	3.75677e+06	2.73144e+06	3.51879e+06	3.25507e+06	3.91192e+07	4.66155e+07	4.67131e+07	3.85176e+07	3.16144e+06	3.37881e+06	3.87132e+06	3.60664e+06	3.25165e+07	4.91819e+07	5.05838e+07	3.26599e+07
P04807	42	39	5035.77	54136	Hexokinase-2 OS=Saccharomyces cerevisiae (strain ATCC 204508 / S288c) GN=HXK2 PE=1 SV=4	2.20101e+08	2.16578e+08	2.23134e+08	2.11654e+08	5.06022e+08	5.64392e+08	5.40637e+08	5.39383e+08	1.85222e+08	2.67908e+08	2.45489e+08	2.34515e+08	4.20613e+08	5.95464e+08	5.85435e+08	4.57354e+08
P15992	10	9	811.25	23865	Heat shock protein 26 OS=Saccharomyces cerevisiae (strain ATCC 204508 / S288c) GN=HSP26 PE=1 SV=3	1.22541e+07	1.53558e+07	2.0397e+07	1.59526e+07	4.92562e+07	5.8485e+07	5.70657e+07	7.07195e+07	1.03122e+07	1.89952e+07	2.24405e+07	1.76756e+07	4.09425e+07	6.17048e+07	6.17943e+07	5.99645e+07
P38773;P38774	5	4	215.15	27319	2-deoxyglucose-6-phosphate phosphatase 2 OS=Saccharomyces cerevisiae (strain ATCC 204508 / S288c) GN=DOG2 PE=1 SV=1	1.35485e+06	1.17709e+06	1.23361e+06	1.1098e+06	5.8122e+06	5.34686e+06	5.39697e+06	5.53802e+06	1.14015e+06	1.45606e+06	1.3572e+06	1.22967e+06	4.83119e+06	5.64123e+06	5.84418e+06	4.6958e+06
P53598	19	18	1637.44	35181	Succinyl-CoA ligase [ADP-forming] subunit alpha, mitochondrial OS=Saccharomyces cerevisiae (strain ATCC 204508 / S288c) GN=LSC1 PE=1 SV=1	1.07571e+07	1.10831e+07	1.04079e+07	1.13683e+07	3.89027e+07	3.40948e+07	3.42304e+07	3.01451e+07	9.05243e+06	1.37099e+07	1.14506e+07	1.25962e+07	3.23365e+07	3.59719e+07	3.70668e+07	2.55606e+07
P04806	42	39	5013.36	53933	Hexokinase-1 OS=Saccharomyces cerevisiae (strain ATCC 204508 / S288c) GN=HXK1 PE=1 SV=2	3.38168e+07	2.53921e+07	4.35966e+07	4.19595e+07	8.1129e+08	7.13229e+08	8.13198e+08	5.53017e+08	2.84579e+07	3.14102e+07	4.79643e+07	4.64914e+07	6.74357e+08	7.52496e+08	8.80582e+08	4.68914e+08
P53312	14	14	1014.46	47156	Succinyl-CoA ligase [ADP-forming] subunit beta, mitochondrial OS=Saccharomyces cerevisiae (strain ATCC 204508 / S288c) GN=LSC2 PE=1 SV=1	5.54028e+06	5.79905e+06	5.36771e+06	5.47704e+06	1.90017e+07	1.76036e+07	1.54585e+07	1.61741e+07	4.66232e+06	7.17345e+06	5.90548e+06	6.06861e+06	1.57945e+07	1.85727e+07	1.67394e+07	1.37143e+07
P01097	3	3	265.1	9864	ATPase inhibitor, mitochondrial OS=Saccharomyces cerevisiae (strain ATCC 204508 / S288c) GN=INH1 PE=1 SV=2	403005	340008	414941	539728	3.37163e+06	3.16112e+06	2.83964e+06	3.10096e+06	339141	420591	456512	598023	2.80255e+06	3.33515e+06	3.07494e+06	2.62937e+06
P07251	26	26	2336.04	58629	ATP synthase subunit alpha, mitochondrial OS=Saccharomyces cerevisiae (strain ATCC 204508 / S288c) GN=ATP1 PE=1 SV=5	2.97295e+07	2.89762e+07	3.16827e+07	3.41914e+07	1.28219e+08	1.14631e+08	1.09713e+08	1.11203e+08	2.50182e+07	3.58436e+07	3.48569e+07	3.78844e+07	1.06577e+08	1.20942e+08	1.18804e+08	9.42912e+07
P10662	5	5	199.46	36877	37S ribosomal protein MRP1, mitochondrial OS=Saccharomyces cerevisiae (strain ATCC 204508 / S288c) GN=MRP1 PE=1 SV=2	1.05528e+06	947554	1.045e+06	1.12883e+06	2.60963e+06	2.80481e+06	2.45873e+06	2.43249e+06	888047	1.17213e+06	1.14969e+06	1.25075e+06	2.16916e+06	2.95922e+06	2.66247e+06	2.06255e+06
P17505	19	18	2062.72	35685	Malate dehydrogenase, mitochondrial OS=Saccharomyces cerevisiae (strain ATCC 204508 / S288c) GN=MDH1 PE=1 SV=2	1.53822e+07	1.49489e+07	1.68951e+07	2.11833e+07	1.0346e+08	9.44684e+07	8.53841e+07	8.70277e+07	1.29446e+07	1.84918e+07	1.85877e+07	2.34712e+07	8.59972e+07	9.96693e+07	9.24592e+07	7.37925e+07
P04840	20	20	2316.93	30524	Mitochondrial outer membrane protein porin 1 OS=Saccharomyces cerevisiae (strain ATCC 204508 / S288c) GN=POR1 PE=1 SV=4	6.22272e+07	6.73492e+07	5.42201e+07	5.79916e+07	2.45288e+08	2.19621e+08	2.07162e+08	2.09033e+08	5.2366e+07	8.33113e+07	5.96522e+07	6.42551e+07	2.03887e+08	2.31712e+08	2.24328e+08	1.77244e+08
P38077	14	14	1205.03	34443	ATP synthase subunit gamma, mitochondrial OS=Saccharomyces cerevisiae (strain ATCC 204508 / S288c) GN=ATP3 PE=1 SV=1	1.32754e+07	1.3725e+07	1.3022e+07	1.48691e+07	5.30447e+07	4.66885e+07	4.24863e+07	3.95405e+07	1.11716e+07	1.69779e+07	1.43266e+07	1.64751e+07	4.40916e+07	4.92589e+07	4.60068e+07	3.35272e+07
Q12525	3	3	163.18	36920	Homocysteine S-methyltransferase 1 OS=Saccharomyces cerevisiae (strain ATCC 204508 / S288c) GN=MHT1 PE=1 SV=1	524757	669531	595267	524596	1.36763e+06	1.48505e+06	1.40653e+06	1.57515e+06	441599	828212	654904	581256	1.13679e+06	1.56681e+06	1.52308e+06	1.3356e+06
Q12329	3	3	164.09	42848	Heat shock protein 42 OS=Saccharomyces cerevisiae (strain ATCC 204508 / S288c) GN=HSP42 PE=1 SV=1	1.22503e+06	1.6997e+06	1.75977e+06	895785	1.94671e+06	1.38971e+06	1.62347e+06	1.48309e+06	1.0309e+06	2.10253e+06	1.93608e+06	992537	1.61813e+06	1.46622e+06	1.758e+06	1.25754e+06
P39714	13	12	904.09	42182	(R,R)-butanediol dehydrogenase OS=Saccharomyces cerevisiae (strain ATCC 204508 / S288c) GN=BDH1 PE=1 SV=2	1.64154e+06	1.66662e+06	1.55643e+06	1.70508e+06	9.37081e+06	7.98707e+06	8.39007e+06	6.52875e+06	1.38141e+06	2.06162e+06	1.71236e+06	1.88924e+06	7.78915e+06	8.42679e+06	9.08529e+06	5.53586e+06
P18239;P18238;P04710	36	35	2735.24	34632	ADP,ATP carrier protein 2 OS=Saccharomyces cerevisiae (strain ATCC 204508 / S288c) GN=PET9 PE=1 SV=2	2.91955e+07	3.03488e+07	2.86206e+07	3.31879e+07	1.31341e+08	1.21814e+08	1.07102e+08	1.18493e+08	2.45689e+07	3.75416e+07	3.1488e+07	3.67724e+07	1.09173e+08	1.2852e+08	1.15977e+08	1.00473e+08
P36531	2	2	141.14	20078	54S ribosomal protein L36, mitochondrial OS=Saccharomyces cerevisiae (strain ATCC 204508 / S288c) GN=MRPL36 PE=1 SV=3	561406	481939	588335	629052	1.94546e+06	2.15621e+06	2.06966e+06	2.23801e+06	472440	596161	647277	696995	1.6171e+06	2.27492e+06	2.24115e+06	1.89765e+06
P39003	17	2	1652.94	63291	High-affinity hexose transporter HXT6 OS=Saccharomyces cerevisiae (strain ATCC 204508 / S288c) GN=HXT6 PE=1 SV=2	4.3546e+06	3.49335e+06	4.77961e+06	5.92539e+06	6.83469e+07	7.24077e+07	8.59257e+07	6.98424e+07	3.66453e+06	4.32129e+06	5.25846e+06	6.56539e+06	5.6811e+07	7.63941e+07	9.30457e+07	5.92208e+07
P38824	3	3	117.32	17535	Cytochrome c oxidase-assembly factor COX23, mitochondrial OS=Saccharomyces cerevisiae (strain ATCC 204508 / S288c) GN=COX23 PE=1 SV=1	45919.8	31755.8	45305.9	76572.5	1.07242e+06	1.06463e+06	1.17553e+06	1.00643e+06	38642.9	39282	49844.9	84842.9	891410	1.12324e+06	1.27294e+06	853372
Q03516	9	9	324.15	107946	Uncharacterized protein RSN1 OS=Saccharomyces cerevisiae (strain ATCC 204508 / S288c) GN=RSN1 PE=1 SV=1	3.26661e+06	3.23664e+06	3.61795e+06	3.14783e+06	1.8174e+06	1.97939e+06	2.04789e+06	1.79177e+06	2.74895e+06	4.00374e+06	3.98042e+06	3.48783e+06	1.51065e+06	2.08836e+06	2.21759e+06	1.51928e+06
P39004;P13181;P39924	20	5	1913.64	63321	High-affinity hexose transporter HXT6 OS=Saccharomyces cerevisiae (strain ATCC 204508 / S288c) GN=HXT7 PE=1 SV=1	2.07887e+07	1.54228e+07	2.29622e+07	1.92993e+07	3.58544e+08	4.09148e+08	4.58293e+08	3.9366e+08	1.74943e+07	1.90781e+07	2.52626e+07	2.13838e+07	2.98028e+08	4.31673e+08	4.96268e+08	3.33793e+08
P09624	25	25	1971.37	54261	Dihydrolipoyl dehydrogenase, mitochondrial OS=Saccharomyces cerevisiae (strain ATCC 204508 / S288c) GN=LPD1 PE=1 SV=1	1.38847e+07	1.58509e+07	1.56364e+07	1.7284e+07	3.73328e+07	3.69887e+07	3.43324e+07	3.61384e+07	1.16844e+07	1.96077e+07	1.72029e+07	1.91508e+07	3.10316e+07	3.90251e+07	3.71773e+07	3.06425e+07
Q06218	13	12	674.35	68302	ATP-dependent RNA helicase DBP9 OS=Saccharomyces cerevisiae (strain ATCC 204508 / S288c) GN=DBP9 PE=1 SV=1	3.70096e+06	3.62695e+06	3.87535e+06	3.75457e+06	2.43717e+06	2.4837e+06	2.74953e+06	2.52079e+06	3.11447e+06	4.48656e+06	4.26361e+06	4.16009e+06	2.02581e+06	2.62043e+06	2.97737e+06	2.13743e+06
P40961	10	10	834.78	31408	Prohibitin-1 OS=Saccharomyces cerevisiae (strain ATCC 204508 / S288c) GN=PHB1 PE=1 SV=2	6.14584e+06	6.21998e+06	5.71737e+06	6.40548e+06	1.18245e+07	1.03369e+07	1.09491e+07	1.02981e+07	5.17191e+06	7.69415e+06	6.29017e+06	7.09733e+06	9.8287e+06	1.0906e+07	1.18564e+07	8.73195e+06
P20447	22	21	1433.93	58961	ATP-dependent RNA helicase DBP3 OS=Saccharomyces cerevisiae (strain ATCC 204508 / S288c) GN=DBP3 PE=1 SV=2	7.07278e+06	7.14516e+06	7.57426e+06	7.04137e+06	4.33413e+06	4.7689e+06	4.47474e+06	4.55343e+06	5.95196e+06	8.83859e+06	8.33309e+06	7.80189e+06	3.60259e+06	5.03145e+06	4.84552e+06	3.86095e+06
P53875	3	3	236.67	16716	54S ribosomal protein L19, mitochondrial OS=Saccharomyces cerevisiae (strain ATCC 204508 / S288c) GN=MRPL19 PE=1 SV=1	707985	728266	651433	697686	1.77979e+06	1.74641e+06	1.77488e+06	1.77762e+06	595791	900868	716697	773042	1.47938e+06	1.84255e+06	1.92195e+06	1.50728e+06
P32466;P40441	17	13	1260.29	63371	Low-affinity glucose transporter HXT3 OS=Saccharomyces cerevisiae (strain ATCC 204508 / S288c) GN=HXT3 PE=1 SV=1	1.58555e+07	9.08346e+06	1.58975e+07	1.17283e+07	784188	542270	789901	1.17186e+06	1.33428e+07	1.12363e+07	1.74902e+07	1.29951e+07	651829	572124	855354	993642
P53278	19	19	1083.21	92700	Uncharacterized protein YGR130C OS=Saccharomyces cerevisiae (strain ATCC 204508 / S288c) GN=YGR130C PE=1 SV=1	2.47858e+06	2.22764e+06	2.50196e+06	2.171e+06	5.99272e+06	5.77689e+06	5.38307e+06	5.31505e+06	2.0858e+06	2.75561e+06	2.75262e+06	2.40548e+06	4.98124e+06	6.09493e+06	5.82912e+06	4.50674e+06
P46367	31	25	3394.74	56973	Potassium-activated aldehyde dehydrogenase, mitochondrial OS=Saccharomyces cerevisiae (strain ATCC 204508 / S288c) GN=ALD4 PE=1 SV=2	3.31064e+07	2.8055e+07	2.56104e+07	2.52565e+07	2.21179e+08	1.57597e+08	1.767e+08	1.28224e+08	2.786e+07	3.47042e+07	2.81762e+07	2.79844e+07	1.83848e+08	1.66273e+08	1.91341e+08	1.08723e+08
O74700	3	2	182.13	10423	Mitochondrial import inner membrane translocase subunit TIM9 OS=Saccharomyces cerevisiae (strain ATCC 204508 / S288c) GN=TIM9 PE=1 SV=1	2.87595e+06	2.8642e+06	2.69953e+06	3.27976e+06	6.44169e+06	6.34704e+06	6.65072e+06	6.60405e+06	2.4202e+06	3.54302e+06	2.96998e+06	3.634e+06	5.35443e+06	6.69648e+06	7.20182e+06	5.59971e+06
P07257	17	16	1163.74	40510	Cytochrome b-c1 complex subunit 2, mitochondrial OS=Saccharomyces cerevisiae (strain ATCC 204508 / S288c) GN=QCR2 PE=1 SV=1	8.67961e+06	7.74395e+06	8.20707e+06	1.06309e+07	5.53671e+07	4.75228e+07	4.14263e+07	4.7298e+07	7.30415e+06	9.57931e+06	9.02929e+06	1.17791e+07	4.6022e+07	5.01392e+07	4.4859e+07	4.01049e+07
P39677	4	4	305.39	91853	Ribosome-releasing factor 2, mitochondrial OS=Saccharomyces cerevisiae (strain ATCC 204508 / S288c) GN=MEF2 PE=1 SV=1	96484.6	82433.8	62943.4	57167.3	646850	823483	860119	691509	81194.7	101971	69249.4	63341.8	537671	868819	931391	586344
P38071	10	10	982.74	42155	Enoyl-[acyl-carrier protein] reductase [NADPH, B-specific], mitochondrial OS=Saccharomyces cerevisiae (strain ATCC 204508 / S288c) GN=ETR1 PE=1 SV=3	4.07984e+06	4.18457e+06	4.21703e+06	4.464e+06	1.05317e+07	8.88643e+06	9.12175e+06	9.8387e+06	3.43331e+06	5.17633e+06	4.63951e+06	4.94615e+06	8.75409e+06	9.37566e+06	9.8776e+06	8.34244e+06
P40471	8	8	601.02	33021	NADPH-dependent 1-acyldihydroxyacetone phosphate reductase OS=Saccharomyces cerevisiae (strain ATCC 204508 / S288c) GN=AYR1 PE=1 SV=1	4.85664e+06	4.98549e+06	5.40101e+06	5.14423e+06	1.26817e+07	1.0932e+07	1.1198e+07	1.07052e+07	4.08701e+06	6.16707e+06	5.94211e+06	5.69985e+06	1.05412e+07	1.15339e+07	1.21259e+07	9.07714e+06
Q04869	9	9	588.93	38306	Uncharacterized protein YMR315W OS=Saccharomyces cerevisiae (strain ATCC 204508 / S288c) GN=YMR315W PE=1 SV=1	5.039e+06	6.57555e+06	5.65937e+06	5.79109e+06	1.16148e+07	1.25793e+07	1.01164e+07	1.09641e+07	4.24047e+06	8.13399e+06	6.22636e+06	6.41657e+06	9.65437e+06	1.32718e+07	1.09547e+07	9.29668e+06
Q12165	6	5	620.57	17067	ATP synthase subunit delta, mitochondrial OS=Saccharomyces cerevisiae (strain ATCC 204508 / S288c) GN=ATP16 PE=1 SV=1	1.00908e+07	1.15013e+07	1.30177e+07	1.52893e+07	4.40356e+07	4.29222e+07	4.13837e+07	3.90853e+07	8.49172e+06	1.42272e+07	1.43219e+07	1.69407e+07	3.66031e+07	4.52853e+07	4.48128e+07	3.31412e+07
P32793	9	5	467.71	50928	Protein YSC84 OS=Saccharomyces cerevisiae (strain ATCC 204508 / S288c) GN=YSC84 PE=1 SV=2	1.13493e+06	1.13025e+06	1.19872e+06	1.20529e+06	2.20041e+06	2.10757e+06	1.84781e+06	1.95186e+06	955075	1.39813e+06	1.31882e+06	1.33548e+06	1.82902e+06	2.2236e+06	2.00092e+06	1.65502e+06
P07256	21	21	1976.95	50254	Cytochrome b-c1 complex subunit 1, mitochondrial OS=Saccharomyces cerevisiae (strain ATCC 204508 / S288c) GN=COR1 PE=1 SV=1	8.56724e+06	9.50603e+06	9.09985e+06	1.07248e+07	4.16217e+07	3.55054e+07	3.23325e+07	3.46605e+07	7.20959e+06	1.1759e+07	1.00115e+07	1.18832e+07	3.45966e+07	3.74601e+07	3.50116e+07	2.93893e+07
P17709	36	32	3557.29	55742	Glucokinase-1 OS=Saccharomyces cerevisiae (strain ATCC 204508 / S288c) GN=GLK1 PE=1 SV=1	1.25795e+07	1.38008e+07	1.7172e+07	1.4299e+07	1.14972e+08	8.23661e+07	9.79387e+07	6.56343e+07	1.0586e+07	1.70717e+07	1.88924e+07	1.58434e+07	9.55664e+07	8.69007e+07	1.06054e+08	5.56527e+07
P32898	10	9	546.21	112452	Mitochondrial presequence protease OS=Saccharomyces cerevisiae (strain ATCC 204508 / S288c) GN=CYM1 PE=1 SV=2	362901	326860	329903	323447	725279	849139	783174	809649	305392	404327	362955	358381	602863	895888	848069	686518
P36010	12	12	786.86	17213	Nucleoside diphosphate kinase OS=Saccharomyces cerevisiae (strain ATCC 204508 / S288c) GN=YNK1 PE=1 SV=1	1.19233e+07	1.2607e+07	1.38449e+07	1.23767e+07	3.51589e+07	3.52925e+07	2.87336e+07	3.05503e+07	1.00338e+07	1.55949e+07	1.5232e+07	1.37135e+07	2.92246e+07	3.72355e+07	3.11146e+07	2.59042e+07
Q07953	4	4	217.19	28550	Ribosome maturation protein SDO1 OS=Saccharomyces cerevisiae (strain ATCC 204508 / S288c) GN=SDO1 PE=1 SV=1	4.33565e+06	4.35187e+06	4.66529e+06	4.32411e+06	2.60776e+06	2.8414e+06	2.5766e+06	2.58224e+06	3.64858e+06	5.38328e+06	5.13268e+06	4.79115e+06	2.16761e+06	2.99783e+06	2.7901e+06	2.18954e+06
P38009	30	24	2691.82	65565	Bifunctional purine biosynthesis protein ADE17 OS=Saccharomyces cerevisiae (strain ATCC 204508 / S288c) GN=ADE17 PE=1 SV=2	3.82678e+07	4.59794e+07	3.96355e+07	4.49145e+07	2.28696e+07	2.22453e+07	2.23859e+07	2.20354e+07	3.22035e+07	5.68768e+07	4.36064e+07	4.97656e+07	1.90095e+07	2.347e+07	2.42409e+07	1.86843e+07
Q12349	3	3	294.21	14176	ATP synthase subunit H, mitochondrial OS=Saccharomyces cerevisiae (strain ATCC 204508 / S288c) GN=ATP14 PE=1 SV=1	5.69255e+06	4.97373e+06	5.44856e+06	6.67255e+06	3.2796e+07	2.69001e+07	2.35825e+07	2.51924e+07	4.79045e+06	6.15252e+06	5.99442e+06	7.39324e+06	2.72605e+07	2.83811e+07	2.55366e+07	2.13611e+07
P30902	8	8	579.08	19797	ATP synthase subunit d, mitochondrial OS=Saccharomyces cerevisiae (strain ATCC 204508 / S288c) GN=ATP7 PE=1 SV=2	6.99318e+06	7.85064e+06	7.52129e+06	9.04731e+06	3.24609e+07	3.14789e+07	2.24073e+07	2.97489e+07	5.88497e+06	9.71128e+06	8.27481e+06	1.00245e+07	2.69819e+07	3.32119e+07	2.4264e+07	2.52247e+07
P53184	10	9	786.54	25092	Nicotinamidase OS=Saccharomyces cerevisiae (strain ATCC 204508 / S288c) GN=PNC1 PE=1 SV=1	1.15068e+07	1.2167e+07	1.3395e+07	1.17212e+07	3.68481e+07	3.0643e+07	3.28787e+07	2.7045e+07	9.68329e+06	1.50507e+07	1.4737e+07	1.29872e+07	3.06287e+07	3.233e+07	3.56031e+07	2.2932e+07
P20967	26	26	1777.48	114744	2-oxoglutarate dehydrogenase, mitochondrial OS=Saccharomyces cerevisiae (strain ATCC 204508 / S288c) GN=KGD1 PE=1 SV=2	5.98096e+06	6.01397e+06	6.31347e+06	6.71604e+06	2.07409e+07	1.82472e+07	1.61456e+07	1.64958e+07	5.03316e+06	7.43931e+06	6.94598e+06	7.44143e+06	1.72402e+07	1.92518e+07	1.74834e+07	1.39871e+07
P08566	46	44	3146.77	175956	Pentafunctional AROM polypeptide OS=Saccharomyces cerevisiae (strain ATCC 204508 / S288c) GN=ARO1 PE=1 SV=1	9.52806e+06	1.03953e+07	1.0013e+07	1.03649e+07	1.40206e+07	1.44757e+07	1.41922e+07	1.49932e+07	8.01815e+06	1.2859e+07	1.10162e+07	1.14844e+07	1.16541e+07	1.52726e+07	1.53682e+07	1.27131e+07
P36516	5	5	148.03	44257	54S ribosomal protein L3, mitochondrial OS=Saccharomyces cerevisiae (strain ATCC 204508 / S288c) GN=MRPL3 PE=1 SV=2	158597	179601	190360	193373	457106	493042	489557	462346	133464	222167	209432	214259	379954	520186	530123	392033
P36534	5	4	265.77	33787	54S ribosomal protein L40, mitochondrial OS=Saccharomyces cerevisiae (strain ATCC 204508 / S288c) GN=MRPL40 PE=1 SV=2	679142	770967	702577	817791	3.13553e+06	3.01738e+06	3.11869e+06	2.25504e+06	571518	953690	772965	906119	2.6063e+06	3.1835e+06	3.37712e+06	1.91209e+06
P00044;P00045	6	6	474.23	12345	Cytochrome c iso-1 OS=Saccharomyces cerevisiae (strain ATCC 204508 / S288c) GN=CYC1 PE=1 SV=2	1.05524e+06	1.20628e+06	936560	1.41087e+06	7.82348e+06	6.72073e+06	5.67228e+06	5.21596e+06	888014	1.49218e+06	1.03039e+06	1.56326e+06	6.50299e+06	7.09073e+06	6.14229e+06	4.42272e+06
P40513	7	7	720.92	30171	Mitochondrial acidic protein MAM33 OS=Saccharomyces cerevisiae (strain ATCC 204508 / S288c) GN=MAM33 PE=1 SV=1	3.52908e+06	4.53688e+06	4.80063e+06	4.92414e+06	1.20852e+07	1.16289e+07	1.17504e+07	1.13248e+07	2.96983e+06	5.61214e+06	5.28158e+06	5.45599e+06	1.00454e+07	1.22691e+07	1.2724e+07	9.60254e+06
P11412	24	24	1785.47	57543	Glucose-6-phosphate 1-dehydrogenase OS=Saccharomyces cerevisiae (strain ATCC 204508 / S288c) GN=ZWF1 PE=1 SV=4	6.48614e+06	8.50274e+06	6.97239e+06	7.7398e+06	1.53029e+07	1.58879e+07	1.58987e+07	1.74234e+07	5.45828e+06	1.05179e+07	7.67092e+06	8.57576e+06	1.272e+07	1.67626e+07	1.72161e+07	1.47736e+07
P32904	4	4	220.16	23931	54S ribosomal protein L6, mitochondrial OS=Saccharomyces cerevisiae (strain ATCC 204508 / S288c) GN=MRPL6 PE=1 SV=2	224707	194103	197726	154961	668259	651115	652245	613930	189098	240106	217535	171698	555467	686961	706291	520564
P00830	30	30	3895.54	54817	ATP synthase subunit beta, mitochondrial OS=Saccharomyces cerevisiae (strain ATCC 204508 / S288c) GN=ATP2 PE=1 SV=2	3.05012e+07	3.08964e+07	3.37955e+07	4.68935e+07	1.23205e+08	1.21395e+08	1.1281e+08	1.23235e+08	2.56677e+07	3.82191e+07	3.71813e+07	5.19584e+07	1.0241e+08	1.28079e+08	1.22157e+08	1.04493e+08
P02992	26	26	2580.72	48113	Elongation factor Tu, mitochondrial OS=Saccharomyces cerevisiae (strain ATCC 204508 / S288c) GN=TUF1 PE=1 SV=1	1.48624e+07	1.38406e+07	1.48733e+07	1.45734e+07	4.4817e+07	4.39721e+07	3.93734e+07	3.35706e+07	1.25072e+07	1.71209e+07	1.63634e+07	1.61474e+07	3.72526e+07	4.6393e+07	4.26359e+07	2.84652e+07
P00812	10	9	698.92	35981	Arginase OS=Saccharomyces cerevisiae (strain ATCC 204508 / S288c) GN=CAR1 PE=1 SV=1	1.08846e+07	9.2087e+06	1.06778e+07	1.06961e+07	2.31834e+07	2.31208e+07	2.24635e+07	1.99739e+07	9.15968e+06	1.13912e+07	1.17475e+07	1.18514e+07	1.92704e+07	2.43937e+07	2.43249e+07	1.69363e+07
P05626	10	10	840.03	26965	ATP synthase subunit 4, mitochondrial OS=Saccharomyces cerevisiae (strain ATCC 204508 / S288c) GN=ATP4 PE=1 SV=2	8.15159e+06	8.64622e+06	8.46567e+06	1.00547e+07	3.1014e+07	2.88268e+07	2.27072e+07	2.92453e+07	6.85981e+06	1.06954e+07	9.3138e+06	1.11407e+07	2.57793e+07	3.04138e+07	2.45888e+07	2.47977e+07
Q05911	23	20	1825.58	54704	Adenylosuccinate lyase OS=Saccharomyces cerevisiae (strain ATCC 204508 / S288c) GN=ADE13 PE=1 SV=1	2.10767e+07	2.25329e+07	2.05955e+07	2.19493e+07	1.05916e+07	1.31911e+07	1.17674e+07	1.24031e+07	1.77367e+07	2.78733e+07	2.26588e+07	2.432e+07	8.8039e+06	1.39173e+07	1.27425e+07	1.05169e+07
P36519	2	2	110.28	33306	54S ribosomal protein L7, mitochondrial OS=Saccharomyces cerevisiae (strain ATCC 204508 / S288c) GN=MRPL7 PE=1 SV=2	523907	433243	607848	560247	1.43976e+06	1.32569e+06	1.72664e+06	1.34251e+06	440883	535923	668746	620758	1.19675e+06	1.39867e+06	1.86971e+06	1.13834e+06
P00127	4	4	302.64	17361	Cytochrome b-c1 complex subunit 6 OS=Saccharomyces cerevisiae (strain ATCC 204508 / S288c) GN=QCR6 PE=1 SV=2	1.07921e+06	1.07677e+06	1.20778e+06	1.81538e+06	1.0478e+07	8.44308e+06	9.04843e+06	7.62919e+06	908188	1.33197e+06	1.32878e+06	2.01146e+06	8.7095e+06	8.90791e+06	9.7982e+06	6.46894e+06
P53076	7	6	516.06	108511	Vacuolar import and degradation protein 30 OS=Saccharomyces cerevisiae (strain ATCC 204508 / S288c) GN=VID30 PE=1 SV=1	199502	177719	205434	237392	686816	585455	624119	530918	167887	219840	226015	263032	570892	617687	675835	450176
P50087	4	3	362.54	27009	MICOS subunit MIC26 OS=Saccharomyces cerevisiae (strain ATCC 204508 / S288c) GN=MIC26 PE=1 SV=1	410796	434578	434094	452311	1.47539e+06	1.20181e+06	1.15002e+06	1.27056e+06	345697	537575	477584	501165	1.22637e+06	1.26798e+06	1.24532e+06	1.07733e+06
P50085	6	6	452.89	34442	Prohibitin-2 OS=Saccharomyces cerevisiae (strain ATCC 204508 / S288c) GN=PHB2 PE=1 SV=2	2.60979e+06	2.70826e+06	2.77882e+06	2.70681e+06	4.16876e+06	3.86651e+06	4.38872e+06	4.12399e+06	2.19622e+06	3.35013e+06	3.05722e+06	2.99917e+06	3.46513e+06	4.07938e+06	4.75237e+06	3.49681e+06
P36013	16	16	1419.94	74843	NAD-dependent malic enzyme, mitochondrial OS=Saccharomyces cerevisiae (strain ATCC 204508 / S288c) GN=MAE1 PE=1 SV=1	8.25874e+06	1.00611e+07	8.76172e+06	9.48016e+06	2.04583e+06	2.41988e+06	2.88756e+06	2.75054e+06	6.94998e+06	1.24457e+07	9.63951e+06	1.05041e+07	1.70053e+06	2.5531e+06	3.12682e+06	2.33224e+06
P32453	3	3	169.05	36942	Protein ATP11, mitochondrial OS=Saccharomyces cerevisiae (strain ATCC 204508 / S288c) GN=ATP11 PE=1 SV=1	722583	672725	715984	738339	1.65426e+06	1.50408e+06	1.60284e+06	1.48275e+06	608075	832164	787715	818085	1.37504e+06	1.58688e+06	1.73565e+06	1.25726e+06
P19262	11	11	1273.01	50456	Dihydrolipoyllysine-residue succinyltransferase component of 2-oxoglutarate dehydrogenase complex, mitochondrial OS=Saccharomyces cerevisiae (strain ATCC 204508 / S288c) GN=KGD2 PE=1 SV=2	1.57649e+07	1.39319e+07	1.46744e+07	1.80386e+07	8.38788e+07	6.65031e+07	5.50754e+07	5.84963e+07	1.32667e+07	1.72338e+07	1.61446e+07	1.99869e+07	6.97213e+07	7.01644e+07	5.96391e+07	4.96002e+07
P38235	6	6	367.23	40783	Uncharacterized protein YBR053C OS=Saccharomyces cerevisiae (strain ATCC 204508 / S288c) GN=YBR053C PE=1 SV=1	791477	832825	1.06004e+06	863133	3.16426e+06	2.58814e+06	2.53339e+06	2.47088e+06	666052	1.03021e+06	1.16624e+06	956359	2.63018e+06	2.73063e+06	2.74331e+06	2.09511e+06
Q03246	3	3	210.1	27675	37S ribosomal protein S17, mitochondrial OS=Saccharomyces cerevisiae (strain ATCC 204508 / S288c) GN=MRPS17 PE=1 SV=1	642197	596655	744000	624648	1.22843e+06	1.33526e+06	1.29864e+06	1.42507e+06	540428	738065	818538	692115	1.02109e+06	1.40877e+06	1.40625e+06	1.20835e+06
P43612	3	3	269.36	115216	SIT4-associating protein SAP155 OS=Saccharomyces cerevisiae (strain ATCC 204508 / S288c) GN=SAP155 PE=1 SV=4	276551	215663	237620	212406	686677	621462	766296	535360	232726	266776	261426	235348	570776	655676	829793	453942
P02381	3	3	149.39	47149	Ribosomal protein VAR1, mitochondrial OS=Saccharomyces cerevisiae (strain ATCC 204508 / S288c) GN=VAR1 PE=1 SV=3	353351	299535	304079	479256	1.07471e+06	902065	1.02654e+06	914114	297356	370526	334544	531020	893319	951728	1.1116e+06	775096
P07143	9	9	977.68	34261	Cytochrome c1, heme protein, mitochondrial OS=Saccharomyces cerevisiae (strain ATCC 204508 / S288c) GN=CYT1 PE=1 SV=1	2.7541e+06	1.87383e+06	2.41453e+06	3.58077e+06	2.29746e+07	1.78864e+07	1.77137e+07	1.76265e+07	2.31766e+06	2.31793e+06	2.65643e+06	3.96752e+06	1.90968e+07	1.88711e+07	1.91815e+07	1.49458e+07
P40215	23	22	1578.68	62849	External NADH-ubiquinone oxidoreductase 1, mitochondrial OS=Saccharomyces cerevisiae (strain ATCC 204508 / S288c) GN=NDE1 PE=1 SV=1	5.89074e+06	5.05727e+06	5.99225e+06	7.42263e+06	3.40559e+07	3.13271e+07	2.48063e+07	2.66539e+07	4.95724e+06	6.25587e+06	6.59259e+06	8.22433e+06	2.83077e+07	3.30518e+07	2.68619e+07	2.26004e+07
P27616	12	12	791.6	34639	Phosphoribosylaminoimidazole-succinocarboxamide synthase OS=Saccharomyces cerevisiae (strain ATCC 204508 / S288c) GN=ADE1 PE=1 SV=2	1.97734e+07	2.08959e+07	1.95745e+07	2.14645e+07	9.01375e+06	9.42335e+06	9.24874e+06	1.20641e+07	1.66399e+07	2.58483e+07	2.15355e+07	2.37829e+07	7.49236e+06	9.94214e+06	1.00151e+07	1.02294e+07
P25719	7	7	535.71	20020	Peptidyl-prolyl cis-trans isomerase C, mitochondrial OS=Saccharomyces cerevisiae (strain ATCC 204508 / S288c) GN=CPR3 PE=1 SV=1	1.40879e+07	1.4987e+07	1.46612e+07	1.42747e+07	2.3172e+07	2.46882e+07	2.52689e+07	2.09646e+07	1.18554e+07	1.8539e+07	1.61301e+07	1.58165e+07	1.92609e+07	2.60474e+07	2.73628e+07	1.77763e+07
P49089	34	24	2441.56	64942	Asparagine synthetase [glutamine-hydrolyzing] 1 OS=Saccharomyces cerevisiae (strain ATCC 204508 / S288c) GN=ASN1 PE=1 SV=2	3.15603e+07	3.15811e+07	3.42984e+07	3.0053e+07	1.99734e+07	2.41001e+07	2.14614e+07	2.0433e+07	2.6559e+07	3.90659e+07	3.77346e+07	3.3299e+07	1.66022e+07	2.54269e+07	2.32397e+07	1.73255e+07
Q03713	3	3	132.14	18580	Respiratory supercomplex factor 1, mitochondrial OS=Saccharomyces cerevisiae (strain ATCC 204508 / S288c) GN=RCF1 PE=1 SV=1	395236	292644	285790	375070	1.41325e+06	1.03932e+06	1.14442e+06	1.0866e+06	332603	362002	314421	415581	1.17471e+06	1.09654e+06	1.23925e+06	921349
P42938	3	2	241.36	33544	Probable ATP-dependent kinase TDA10 OS=Saccharomyces cerevisiae (strain ATCC 204508 / S288c) GN=TDA10 PE=1 SV=1	303053	383745	436698	379317	1.07976e+06	1.15826e+06	1.12111e+06	846624	255029	474694	480448	420286	897512	1.22203e+06	1.21401e+06	717870
P36147	2	2	267.66	22068	Presequence translocated-associated motor subunit PAM17, mitochondrial OS=Saccharomyces cerevisiae (strain ATCC 204508 / S288c) GN=PAM17 PE=1 SV=1	2.65487e+06	2.69267e+06	3.17435e+06	2.8256e+06	6.06568e+06	6.02641e+06	5.91683e+06	5.5586e+06	2.23416e+06	3.33084e+06	3.49237e+06	3.13078e+06	5.04189e+06	6.35819e+06	6.40712e+06	4.71325e+06
P32191	21	21	1212.69	72799	Glycerol-3-phosphate dehydrogenase, mitochondrial OS=Saccharomyces cerevisiae (strain ATCC 204508 / S288c) GN=GUT2 PE=1 SV=2	1.49196e+06	1.20155e+06	1.66588e+06	2.02932e+06	9.87218e+06	7.99682e+06	7.91739e+06	6.6506e+06	1.25553e+06	1.48632e+06	1.83277e+06	2.24851e+06	8.2059e+06	8.43708e+06	8.57345e+06	5.63918e+06
P10507	4	4	238.68	51109	Mitochondrial-processing peptidase subunit beta OS=Saccharomyces cerevisiae (strain ATCC 204508 / S288c) GN=MAS1 PE=1 SV=1	942636	1.01539e+06	916372	1.01848e+06	1.85729e+06	1.80921e+06	1.75444e+06	1.92736e+06	793257	1.25605e+06	1.00818e+06	1.12849e+06	1.54381e+06	1.90882e+06	1.89981e+06	1.63424e+06
P32340	15	15	1043.57	57214	Rotenone-insensitive NADH-ubiquinone oxidoreductase, mitochondrial OS=Saccharomyces cerevisiae (strain ATCC 204508 / S288c) GN=NDI1 PE=1 SV=1	2.33114e+06	1.77937e+06	2.12201e+06	2.70131e+06	1.88232e+07	1.40112e+07	1.26279e+07	1.32031e+07	1.96173e+06	2.20109e+06	2.33461e+06	2.99308e+06	1.56462e+07	1.47826e+07	1.36743e+07	1.11952e+07
P32288	16	16	1242.64	42138	Glutamine synthetase OS=Saccharomyces cerevisiae (strain ATCC 204508 / S288c) GN=GLN1 PE=1 SV=4	4.39851e+07	4.43172e+07	4.97298e+07	3.85244e+07	2.04532e+07	2.38889e+07	2.33376e+07	2.29058e+07	3.70148e+07	5.48206e+07	5.4712e+07	4.26854e+07	1.7001e+07	2.52041e+07	2.52714e+07	1.94223e+07
P09457	7	7	714.42	22857	ATP synthase subunit 5, mitochondrial OS=Saccharomyces cerevisiae (strain ATCC 204508 / S288c) GN=ATP5 PE=1 SV=1	4.61866e+06	4.97928e+06	5.67561e+06	5.99042e+06	1.62477e+07	2.06044e+07	1.65985e+07	1.95455e+07	3.88674e+06	6.15939e+06	6.24422e+06	6.63743e+06	1.35053e+07	2.17388e+07	1.79739e+07	1.65731e+07
Q06630	2	2	59.7	27106	Mitochondrial homologous recombination protein 1 OS=Saccharomyces cerevisiae (strain ATCC 204508 / S288c) GN=MHR1 PE=1 SV=1	338263	332017	352408	373913	1.12373e+06	1.03174e+06	1.05654e+06	1.12071e+06	284659	410706	387714	414299	934063	1.08854e+06	1.14408e+06	950276
P00890	16	15	1209.74	53384	Citrate synthase, mitochondrial OS=Saccharomyces cerevisiae (strain ATCC 204508 / S288c) GN=CIT1 PE=1 SV=2	5.67629e+06	5.79181e+06	6.88182e+06	8.28161e+06	7.1475e+07	5.87584e+07	4.62553e+07	4.56074e+07	4.77677e+06	7.1645e+06	7.57127e+06	9.17609e+06	5.94111e+07	6.19933e+07	5.00881e+07	3.86714e+07
P53292	3	3	175	39608	37S ribosomal protein S35, mitochondrial OS=Saccharomyces cerevisiae (strain ATCC 204508 / S288c) GN=MRPS35 PE=1 SV=1	200300	240817	290455	258238	728364	707955	880701	771603	168559	297892	319555	286130	605427	746931	953678	654258
P36060	11	10	1007.69	34174	NADH-cytochrome b5 reductase 2 OS=Saccharomyces cerevisiae (strain ATCC 204508 / S288c) GN=MCR1 PE=1 SV=1	5.16524e+06	4.43465e+06	5.53697e+06	5.10095e+06	2.32211e+07	1.94484e+07	1.82312e+07	1.44325e+07	4.34671e+06	5.48568e+06	6.09169e+06	5.6519e+06	1.93018e+07	2.05191e+07	1.97419e+07	1.22376e+07
P81449	2	2	228.35	10926	ATP synthase subunit e, mitochondrial OS=Saccharomyces cerevisiae (strain ATCC 204508 / S288c) GN=TIM11 PE=1 SV=2	4.62066e+06	4.05229e+06	4.49627e+06	5.61648e+06	2.54864e+07	2.20238e+07	1.52351e+07	2.23787e+07	3.88843e+06	5.0127e+06	4.94673e+06	6.22311e+06	2.11847e+07	2.32363e+07	1.64975e+07	1.89753e+07
P38805	5	5	241.85	35157	Ribosome production factor 1 OS=Saccharomyces cerevisiae (strain ATCC 204508 / S288c) GN=RPF1 PE=1 SV=1	2.04041e+06	2.55727e+06	2.48761e+06	2.3281e+06	1.02259e+06	1.27088e+06	1.33381e+06	1.1952e+06	1.71706e+06	3.16335e+06	2.73683e+06	2.57955e+06	849989	1.34084e+06	1.44434e+06	1.01343e+06
P23641	20	20	1636.65	32962	Mitochondrial phosphate carrier protein OS=Saccharomyces cerevisiae (strain ATCC 204508 / S288c) GN=MIR1 PE=1 SV=1	2.50871e+07	1.87824e+07	2.10383e+07	2.66208e+07	8.8425e+07	7.72111e+07	6.63673e+07	8.08932e+07	2.11115e+07	2.32339e+07	2.31461e+07	2.9496e+07	7.35002e+07	8.14619e+07	7.18667e+07	6.8591e+07
P08417	20	20	1307.11	53574	Fumarate hydratase, mitochondrial OS=Saccharomyces cerevisiae (strain ATCC 204508 / S288c) GN=FUM1 PE=1 SV=2	1.60485e+07	1.69318e+07	1.60791e+07	1.54874e+07	3.10539e+07	2.8892e+07	2.44026e+07	2.5025e+07	1.35053e+07	2.09448e+07	1.769e+07	1.71601e+07	2.58124e+07	3.04827e+07	2.64246e+07	2.12192e+07
P36112	13	13	1114.25	61615	MICOS complex subunit MIC60 OS=Saccharomyces cerevisiae (strain ATCC 204508 / S288c) GN=MIC60 PE=1 SV=1	2.42356e+06	2.5615e+06	2.50292e+06	2.86522e+06	6.89014e+06	5.68611e+06	6.08926e+06	6.11115e+06	2.0395e+06	3.16859e+06	2.75367e+06	3.17469e+06	5.72719e+06	5.99915e+06	6.59383e+06	5.18177e+06
P17558	3	2	112.57	35976	37S ribosomal protein PET123, mitochondrial OS=Saccharomyces cerevisiae (strain ATCC 204508 / S288c) GN=PET123 PE=1 SV=1	292584	360324	374155	362548	1.11155e+06	1.06198e+06	1.09489e+06	918860	246219	445723	411640	401707	923935	1.12045e+06	1.18562e+06	779120
P40582	8	8	488.94	26778	Glutathione S-transferase 1 OS=Saccharomyces cerevisiae (strain ATCC 204508 / S288c) GN=GTT1 PE=1 SV=1	1.91079e+06	1.83189e+06	2.21648e+06	1.90598e+06	4.36874e+06	3.53916e+06	3.54985e+06	3.95921e+06	1.60799e+06	2.26605e+06	2.43854e+06	2.11184e+06	3.63136e+06	3.734e+06	3.844e+06	3.35709e+06
P24783	25	20	1720.44	61247	ATP-dependent RNA helicase DBP2 OS=Saccharomyces cerevisiae (strain ATCC 204508 / S288c) GN=DBP2 PE=1 SV=1	2.64602e+07	2.23517e+07	3.17167e+07	2.28529e+07	1.03586e+07	1.18695e+07	1.09023e+07	1.20678e+07	2.2267e+07	2.76491e+07	3.48942e+07	2.53212e+07	8.61024e+06	1.2523e+07	1.18057e+07	1.02326e+07
P36148	10	10	480.56	84049	Glycerol-3-phosphate O-acyltransferase 2 OS=Saccharomyces cerevisiae (strain ATCC 204508 / S288c) GN=GPT2 PE=1 SV=1	785818	902552	720349	792245	3.30761e+06	2.68231e+06	2.68078e+06	3.42558e+06	661289	1.11646e+06	792517	877814	2.74933e+06	2.82998e+06	2.90291e+06	2.90462e+06
P07248	19	19	1096.22	152100	Regulatory protein ADR1 OS=Saccharomyces cerevisiae (strain ATCC 204508 / S288c) GN=ADR1 PE=1 SV=2	599239	707296	563670	578062	2.2103e+06	2.11027e+06	1.94702e+06	2.41498e+06	504278	874929	620142	640497	1.83723e+06	2.22645e+06	2.10836e+06	2.04771e+06
Q00055	13	11	1123.62	43412	Glycerol-3-phosphate dehydrogenase [NAD(+)] 1 OS=Saccharomyces cerevisiae (strain ATCC 204508 / S288c) GN=GPD1 PE=1 SV=4	1.37031e+07	1.49679e+07	1.47262e+07	1.56395e+07	2.15009e+07	2.18541e+07	1.93208e+07	2.02156e+07	1.15316e+07	1.85154e+07	1.62015e+07	1.73287e+07	1.78719e+07	2.30573e+07	2.09218e+07	1.71412e+07
Q12008	3	3	98.58	36336	Phosphoglycerate mutase 2 OS=Saccharomyces cerevisiae (strain ATCC 204508 / S288c) GN=GPM2 PE=1 SV=1	55993.4	96626.5	83735	69746.7	281990	203879	223491	320237	47120.1	119527	92124	77279.9	234394	215104	242010	271536
P40032	21	21	1450.71	74337	Prolyl 3,4-dihydroxylase TPA1 OS=Saccharomyces cerevisiae (strain ATCC 204508 / S288c) GN=TPA1 PE=1 SV=1	8.15911e+06	9.04381e+06	8.92888e+06	8.68808e+06	5.03264e+06	5.59543e+06	5.86997e+06	5.2477e+06	6.86614e+06	1.11872e+07	9.82342e+06	9.62646e+06	4.1832e+06	5.90348e+06	6.35637e+06	4.44963e+06
Q06523	13	13	1075.46	49534	Uncharacterized protein YPR148C OS=Saccharomyces cerevisiae (strain ATCC 204508 / S288c) GN=YPR148C PE=1 SV=1	6.76243e+06	6.59122e+06	6.70084e+06	6.40149e+06	9.60707e+06	8.75809e+06	9.25093e+06	9.31308e+06	5.69079e+06	8.15337e+06	7.37216e+06	7.0929e+06	7.98554e+06	9.24027e+06	1.00175e+07	7.89675e+06
Q08235	4	4	346.05	33625	Ribosome biogenesis protein BRX1 OS=Saccharomyces cerevisiae (strain ATCC 204508 / S288c) GN=BRX1 PE=1 SV=2	8.94703e+06	1.00209e+07	9.92094e+06	9.59069e+06	5.02184e+06	5.20873e+06	6.06125e+06	6.02143e+06	7.52919e+06	1.23959e+07	1.09149e+07	1.06266e+07	4.17423e+06	5.49549e+06	6.5635e+06	5.10569e+06
Q08972	48	46	3357.44	134932	[NU+] prion formation protein 1 OS=Saccharomyces cerevisiae (strain ATCC 204508 / S288c) GN=NEW1 PE=1 SV=1	1.99331e+07	1.69258e+07	1.86382e+07	1.93043e+07	1.22625e+07	1.24242e+07	1.11979e+07	1.3187e+07	1.67743e+07	2.09374e+07	2.05055e+07	2.13894e+07	1.01928e+07	1.31082e+07	1.21258e+07	1.11815e+07
P32911	6	6	640.96	12418	Eukaryotic translation initiation factor eIF-1 OS=Saccharomyces cerevisiae (strain ATCC 204508 / S288c) GN=SUI1 PE=1 SV=1	3.52875e+07	3.66259e+07	3.45997e+07	3.68625e+07	2.67609e+07	2.85694e+07	2.73592e+07	2.74403e+07	2.96955e+07	4.53064e+07	3.80661e+07	4.0844e+07	2.22441e+07	3.01423e+07	2.96262e+07	2.32672e+07
Q03862	19	18	1438.6	65685	Probable metalloprotease ARX1 OS=Saccharomyces cerevisiae (strain ATCC 204508 / S288c) GN=ARX1 PE=1 SV=1	1.46803e+07	1.63114e+07	1.61905e+07	1.45459e+07	1.05625e+07	1.05055e+07	1.0406e+07	1.13173e+07	1.23539e+07	2.01773e+07	1.78125e+07	1.6117e+07	8.77971e+06	1.10839e+07	1.12682e+07	9.59618e+06
P25586	6	6	268.47	37364	KRR1 small subunit processome component OS=Saccharomyces cerevisiae (strain ATCC 204508 / S288c) GN=KRR1 PE=1 SV=1	7.14835e+06	6.92821e+06	7.68335e+06	7.31422e+06	4.332e+06	4.93361e+06	4.65927e+06	5.42608e+06	6.01555e+06	8.57023e+06	8.4531e+06	8.10422e+06	3.60083e+06	5.20522e+06	5.04534e+06	4.60089e+06
P37299	3	3	76.25	8587	Cytochrome b-c1 complex subunit 10 OS=Saccharomyces cerevisiae (strain ATCC 204508 / S288c) GN=QCR10 PE=1 SV=2	479990	471882	430947	659411	3.51889e+06	3.49758e+06	2.12379e+06	3.06186e+06	403926	583720	474121	730633	2.92495e+06	3.69013e+06	2.29978e+06	2.59621e+06
P40055	8	7	435.59	62392	U3 small nucleolar RNA-associated protein 7 OS=Saccharomyces cerevisiae (strain ATCC 204508 / S288c) GN=UTP7 PE=1 SV=1	2.00759e+06	2.40965e+06	1.98278e+06	2.19251e+06	1.24587e+06	1.43104e+06	1.30617e+06	1.36131e+06	1.68944e+06	2.98075e+06	2.18143e+06	2.42932e+06	1.03559e+06	1.50983e+06	1.41441e+06	1.15428e+06
P19955	4	4	164.07	13794	37S ribosomal protein YMR-31, mitochondrial OS=Saccharomyces cerevisiae (strain ATCC 204508 / S288c) GN=YMR31 PE=1 SV=1	937494	1.15773e+06	1.17854e+06	1.24806e+06	3.81847e+06	3.60536e+06	3.23045e+06	2.86832e+06	788930	1.43212e+06	1.29662e+06	1.38286e+06	3.17397e+06	3.80385e+06	3.49814e+06	2.43211e+06
P12695	17	16	1226.33	51957	Dihydrolipoyllysine-residue acetyltransferase component of pyruvate dehydrogenase complex, mitochondrial OS=Saccharomyces cerevisiae (strain ATCC 204508 / S288c) GN=LAT1 PE=1 SV=1	1.9119e+07	2.02919e+07	1.77876e+07	1.99078e+07	2.93918e+07	2.95756e+07	2.94493e+07	3.13709e+07	1.60892e+07	2.51012e+07	1.95697e+07	2.20581e+07	2.44309e+07	3.12038e+07	3.18895e+07	2.66e+07
P47127	8	8	541.98	44571	Altered inheritance of mitochondria protein 24, mitochondrial OS=Saccharomyces cerevisiae (strain ATCC 204508 / S288c) GN=AIM24 PE=1 SV=1	877614	1.03991e+06	1.16397e+06	1.38031e+06	3.0342e+06	2.75495e+06	2.73387e+06	2.91477e+06	738538	1.28637e+06	1.28058e+06	1.52939e+06	2.52207e+06	2.90662e+06	2.9604e+06	2.47149e+06
P53305	2	2	145.36	12385	Mitochondrial 37S ribosomal protein S27 OS=Saccharomyces cerevisiae (strain ATCC 204508 / S288c) GN=RSM27 PE=1 SV=1	167299	211262	207590	215486	707777	837135	908233	787063	140787	261333	228387	238760	588315	883223	983492	667367
P32902	6	5	368.45	44125	37S ribosomal protein MRP4, mitochondrial OS=Saccharomyces cerevisiae (strain ATCC 204508 / S288c) GN=MRP4 PE=1 SV=1	732574	650994	713223	841977	1.91823e+06	2.11087e+06	2.02748e+06	2.57012e+06	616483	805282	784677	932918	1.59446e+06	2.22708e+06	2.19548e+06	2.17925e+06
P40188	3	3	204.65	19331	Respiratory growth induced protein 2 OS=Saccharomyces cerevisiae (strain ATCC 204508 / S288c) GN=RGI2 PE=1 SV=1	18973.4	26678.7	35018.4	12660.1	1.72741e+06	2.31909e+06	3.6715e+06	721505	15966.7	33001.6	38526.7	14027.4	1.43585e+06	2.44677e+06	3.97573e+06	611779
P38970	9	8	371.73	96251	Serine/threonine-protein kinase HAL5 OS=Saccharomyces cerevisiae (strain ATCC 204508 / S288c) GN=HAL5 PE=1 SV=2	258629	330314	341474	294055	356555	340583	335753	418183	217644	408600	375685	325815	296374	359334	363574	354586
Q12287	3	3	122.22	8450	Cytochrome c oxidase copper chaperone OS=Saccharomyces cerevisiae (strain ATCC 204508 / S288c) GN=COX17 PE=1 SV=3	728316	1.17416e+06	942517	1.0191e+06	3.51472e+06	3.31021e+06	3.60522e+06	3.32409e+06	612900	1.45244e+06	1.03694e+06	1.12917e+06	2.92149e+06	3.49245e+06	3.90395e+06	2.81856e+06
Q06405	2	2	60.8	11305	ATP synthase subunit f, mitochondrial OS=Saccharomyces cerevisiae (strain ATCC 204508 / S288c) GN=ATP17 PE=1 SV=1	1.75519e+06	1.68013e+06	2.14071e+06	2.10493e+06	9.98023e+06	9.0144e+06	5.83639e+06	9.08165e+06	1.47705e+06	2.07833e+06	2.35518e+06	2.33228e+06	8.29572e+06	9.51069e+06	6.32001e+06	7.70052e+06
P00854	4	4	136.78	29137	ATP synthase subunit a OS=Saccharomyces cerevisiae (strain ATCC 204508 / S288c) GN=ATP6 PE=1 SV=2	253235	238697	225290	273333	833012	1.02202e+06	645776	946508	213105	295270	247861	302855	692412	1.07829e+06	699287	802564
P40010	17	17	1155.75	57787	Nuclear GTP-binding protein NUG1 OS=Saccharomyces cerevisiae (strain ATCC 204508 / S288c) GN=NUG1 PE=1 SV=1	8.45304e+06	9.14015e+06	9.32904e+06	9.48038e+06	5.82181e+06	6.56066e+06	5.33623e+06	6.64911e+06	7.11349e+06	1.13064e+07	1.02637e+07	1.05043e+07	4.83917e+06	6.92185e+06	5.7784e+06	5.63791e+06
P32897	4	4	359.37	23400	Mitochondrial import inner membrane translocase subunit TIM23 OS=Saccharomyces cerevisiae (strain ATCC 204508 / S288c) GN=TIM23 PE=1 SV=1	3.41329e+06	3.2689e+06	3.29044e+06	3.60227e+06	4.64292e+06	5.05951e+06	4.88686e+06	4.48478e+06	2.87238e+06	4.04365e+06	3.62009e+06	3.99134e+06	3.85926e+06	5.33805e+06	5.2918e+06	3.80273e+06
P12687	7	6	473.7	43314	54S ribosomal protein L2, mitochondrial OS=Saccharomyces cerevisiae (strain ATCC 204508 / S288c) GN=MRP7 PE=1 SV=1	356492	430498	402715	438544	1.04164e+06	1.18025e+06	1.30998e+06	982648	299999	532528	443061	485910	865825	1.24523e+06	1.41853e+06	833207
P34228	2	2	73.36	128824	Putative transcription factor SEF1 OS=Saccharomyces cerevisiae (strain ATCC 204508 / S288c) GN=SEF1 PE=1 SV=4	82700.3	42097.7	62437.5	50421.7	451375	378930	428087	345115	69594.8	52075.1	68692.8	55867.7	375190	399791	463560	292630
P15019	23	23	1465.62	37127	Transaldolase OS=Saccharomyces cerevisiae (strain ATCC 204508 / S288c) GN=TAL1 PE=1 SV=4	4.54099e+07	5.04928e+07	4.86208e+07	5.09381e+07	7.60547e+07	7.58642e+07	6.9714e+07	8.76696e+07	3.82138e+07	6.24598e+07	5.34918e+07	5.64398e+07	6.32178e+07	8.00408e+07	7.54906e+07	7.43369e+07
P47169	18	17	1134.41	161519	Sulfite reductase [NADPH] subunit beta OS=Saccharomyces cerevisiae (strain ATCC 204508 / S288c) GN=MET5 PE=1 SV=1	1.07369e+06	1.1908e+06	997806	1.00198e+06	2.67295e+06	2.57133e+06	2.99116e+06	3.53697e+06	903546	1.47303e+06	1.09777e+06	1.1102e+06	2.22179e+06	2.71289e+06	3.23901e+06	2.99907e+06
Q03533	6	6	357.71	66976	Serine/threonine-protein kinase TDA1 OS=Saccharomyces cerevisiae (strain ATCC 204508 / S288c) GN=TDA1 PE=1 SV=1	447493	229415	234227	331216	1.57333e+06	1.10901e+06	1.39226e+06	1.14338e+06	376579	283788	257693	366990	1.30778e+06	1.17007e+06	1.50763e+06	969494
P38972	61	58	5173.97	150065	Phosphoribosylformylglycinamidine synthase OS=Saccharomyces cerevisiae (strain ATCC 204508 / S288c) GN=ADE6 PE=1 SV=2	5.20388e+07	4.89779e+07	4.86789e+07	5.44476e+07	3.29342e+07	3.56361e+07	3.47998e+07	3.53397e+07	4.37922e+07	6.05859e+07	5.35558e+07	6.03284e+07	2.73754e+07	3.7598e+07	3.76834e+07	2.99653e+07
P32190	8	8	436.11	80458	Glycerol kinase OS=Saccharomyces cerevisiae (strain ATCC 204508 / S288c) GN=GUT1 PE=3 SV=1	344067	342988	320869	328994	1.50389e+06	1.0546e+06	1.19621e+06	1.10607e+06	289543	424278	353015	364528	1.25006e+06	1.11266e+06	1.29533e+06	937859
P39935	27	23	2366.43	107264	Eukaryotic initiation factor 4F subunit p150 OS=Saccharomyces cerevisiae (strain ATCC 204508 / S288c) GN=TIF4631 PE=1 SV=2	1.72411e+07	1.9371e+07	1.88993e+07	1.82563e+07	1.44244e+07	1.40485e+07	1.48294e+07	1.52635e+07	1.45089e+07	2.3962e+07	2.07927e+07	2.02281e+07	1.19897e+07	1.4822e+07	1.60582e+07	1.29423e+07
P0CS90;P39987	36	35	4096.68	70585	Heat shock protein SSC1, mitochondrial OS=Saccharomyces cerevisiae (strain ATCC 204508 / S288c) GN=SSC1 PE=1 SV=1	7.05789e+07	7.83678e+07	8.07604e+07	8.3301e+07	1.19115e+08	1.24995e+08	1.18664e+08	1.37645e+08	5.93943e+07	9.69413e+07	8.88514e+07	9.22982e+07	9.90103e+07	1.31877e+08	1.28497e+08	1.16712e+08
P18961	4	2	118.76	76959	Serine/threonine-protein kinase YPK2/YKR2 OS=Saccharomyces cerevisiae (strain ATCC 204508 / S288c) GN=YPK2 PE=1 SV=1	106197	123145	114336	120223	395645	311891	373811	295819	89368.3	152331	125790	133208	328866	329061	404786	250831
P23493	2	2	175.45	37596	Mitochondrial biogenesis regulation protein 1 OS=Saccharomyces cerevisiae (strain ATCC 204508 / S288c) GN=MBR1 PE=1 SV=2	3438.23	5895.73	5687.52	2702.21	233759	162926	253209	124791	2893.38	7293.05	6257.32	2994.07	194304	171896	274190	105813
P33327	33	33	1893.18	124825	NAD-specific glutamate dehydrogenase OS=Saccharomyces cerevisiae (strain ATCC 204508 / S288c) GN=GDH2 PE=1 SV=1	3.89546e+06	4.83633e+06	5.13176e+06	4.25732e+06	1.50896e+07	1.27854e+07	1.16542e+07	1.01838e+07	3.27815e+06	5.98256e+06	5.64588e+06	4.71715e+06	1.25427e+07	1.34893e+07	1.26199e+07	8.63502e+06
P37298	4	4	285.23	20349	Succinate dehydrogenase [ubiquinone] cytochrome b small subunit, mitochondrial OS=Saccharomyces cerevisiae (strain ATCC 204508 / S288c) GN=SDH4 PE=1 SV=1	1.00826e+06	763461	692370	1.04762e+06	1.26546e+07	9.7821e+06	7.75916e+06	8.58614e+06	848485	944405	761735	1.16077e+06	1.05187e+07	1.03207e+07	8.40211e+06	7.28036e+06
P24031	9	5	798.31	53199	Constitutive acid phosphatase OS=Saccharomyces cerevisiae (strain ATCC 204508 / S288c) GN=PHO3 PE=1 SV=2	9.17445e+06	9.37641e+06	7.06828e+06	7.28427e+06	4.11928e+06	4.03899e+06	4.34222e+06	3.20941e+06	7.72058e+06	1.15987e+07	7.77642e+06	8.07103e+06	3.42401e+06	4.26135e+06	4.70203e+06	2.72132e+06
P36080	4	4	212.18	50451	Ribosomal RNA-processing protein 14 OS=Saccharomyces cerevisiae (strain ATCC 204508 / S288c) GN=RRP14 PE=1 SV=1	534268	468586	549966	485902	230711	205447	245261	318253	449602	579644	605065	538384	191771	216758	265584	269853
P12611	5	5	283.12	55768	Growth regulation protein OS=Saccharomyces cerevisiae (strain ATCC 204508 / S288c) GN=WHI2 PE=1 SV=2	125810	39076.3	76345.8	54814.1	102396	61543	44365.6	106666	105873	48337.6	83994.5	60734.4	85113.1	64931.2	48041.8	90444.6
Q03976	9	9	630.43	37427	37S ribosomal protein S24, mitochondrial OS=Saccharomyces cerevisiae (strain ATCC 204508 / S288c) GN=RSM24 PE=1 SV=1	717422	749062	795411	912238	2.05758e+06	2.09436e+06	2.0388e+06	1.44469e+06	603732	926594	875100	1.01077e+06	1.71029e+06	2.20966e+06	2.20774e+06	1.22498e+06
P38234	10	10	733.5	23078	Protein RFS1 OS=Saccharomyces cerevisiae (strain ATCC 204508 / S288c) GN=RFS1 PE=1 SV=1	5.57758e+06	5.88932e+06	5.77299e+06	6.34602e+06	1.57392e+07	1.25651e+07	1.36759e+07	1.06667e+07	4.6937e+06	7.28512e+06	6.35136e+06	7.03144e+06	1.30827e+07	1.32568e+07	1.48091e+07	9.04447e+06
Q12136	12	12	846.09	70274	Something about silencing protein 10 OS=Saccharomyces cerevisiae (strain ATCC 204508 / S288c) GN=SAS10 PE=1 SV=1	3.7083e+06	4.09376e+06	4.15803e+06	3.94644e+06	2.59025e+06	2.5907e+06	2.37573e+06	3.21134e+06	3.12065e+06	5.064e+06	4.5746e+06	4.37269e+06	2.15306e+06	2.73333e+06	2.57259e+06	2.72296e+06
P32770	5	5	260.23	80105	Asparagine-rich protein OS=Saccharomyces cerevisiae (strain ATCC 204508 / S288c) GN=NRP1 PE=1 SV=2	920262	932706	995267	1.00186e+06	483937	629564	465766	557222	774428	1.15376e+06	1.09498e+06	1.11007e+06	402255	664225	504361	472480
Q03799	5	5	231.48	17744	37S ribosomal protein S8, mitochondrial OS=Saccharomyces cerevisiae (strain ATCC 204508 / S288c) GN=MRPS8 PE=1 SV=1	416308	321110	315837	364852	829531	866604	889922	748630	350336	397215	347479	404259	689519	914314	963663	634779
P42826	8	7	363.83	69133	Xylulose kinase OS=Saccharomyces cerevisiae (strain ATCC 204508 / S288c) GN=XKS1 PE=1 SV=2	319694	263398	259340	196404	1.09995e+06	854294	1.04462e+06	758309	269032	325824	285322	217617	914291	901327	1.13118e+06	642986
P22353	3	3	164.05	27042	54S ribosomal protein L8, mitochondrial OS=Saccharomyces cerevisiae (strain ATCC 204508 / S288c) GN=MRPL8 PE=1 SV=4	1.35022e+06	1.20536e+06	1.65219e+06	1.70754e+06	3.15e+06	3.35937e+06	2.88433e+06	3.24889e+06	1.13625e+06	1.49103e+06	1.81771e+06	1.89197e+06	2.61832e+06	3.54432e+06	3.12334e+06	2.7548e+06
Q06608	5	5	368.04	22608	Pyridoxamine 5'-phosphate oxidase homolog OS=Saccharomyces cerevisiae (strain ATCC 204508 / S288c) GN=YPR172W PE=1 SV=1	2.16433e+06	2.11237e+06	2.07802e+06	1.90622e+06	2.90473e+06	3.08036e+06	3.62993e+06	2.95054e+06	1.82135e+06	2.61302e+06	2.28621e+06	2.11211e+06	2.41446e+06	3.24994e+06	3.93072e+06	2.50183e+06
Q01163	6	6	271.21	50892	37S ribosomal protein S23, mitochondrial OS=Saccharomyces cerevisiae (strain ATCC 204508 / S288c) GN=RSM23 PE=1 SV=3	654360	577288	591021	531083	1.28448e+06	1.37561e+06	1.29452e+06	1.17879e+06	550664	714108	650233	588444	1.06768e+06	1.45135e+06	1.40179e+06	999522
P21306	2	2	114.84	6738	ATP synthase subunit epsilon, mitochondrial OS=Saccharomyces cerevisiae (strain ATCC 204508 / S288c) GN=ATP15 PE=1 SV=2	4.33523e+06	5.89029e+06	5.65284e+06	5.32335e+06	1.20755e+07	1.54861e+07	1.27786e+07	1.41615e+07	3.64823e+06	7.28631e+06	6.21917e+06	5.89832e+06	1.00374e+07	1.63387e+07	1.38375e+07	1.20078e+07
Q12156	3	3	175.22	17234	Protein AIM7 OS=Saccharomyces cerevisiae (strain ATCC 204508 / S288c) GN=AIM7 PE=1 SV=1	1.33834e+06	1.41523e+06	1.5393e+06	1.47956e+06	3.28986e+06	2.86828e+06	3.07446e+06	3.83179e+06	1.12626e+06	1.75065e+06	1.69351e+06	1.63936e+06	2.73458e+06	3.02619e+06	3.32922e+06	3.24905e+06
P06738	37	35	2499.91	103496	Glycogen phosphorylase OS=Saccharomyces cerevisiae (strain ATCC 204508 / S288c) GN=GPH1 PE=1 SV=4	7.83635e+06	6.35166e+06	8.33187e+06	7.02236e+06	3.69039e+07	2.48798e+07	2.4801e+07	1.95124e+07	6.59453e+06	7.85703e+06	9.1666e+06	7.78084e+06	3.06751e+07	2.62496e+07	2.68561e+07	1.6545e+07
Q96VH5	3	3	119.4	10401	MICOS complex subunit MIC10 OS=Saccharomyces cerevisiae (strain ATCC 204508 / S288c) GN=MIC10 PE=1 SV=1	1.48833e+06	1.59313e+06	1.37818e+06	1.57552e+06	4.92512e+06	4.84168e+06	4.59224e+06	4.21442e+06	1.25248e+06	1.97071e+06	1.51626e+06	1.74569e+06	4.09383e+06	5.10824e+06	4.97276e+06	3.57349e+06
Q12335	9	9	1232.19	21010	Protoplast secreted protein 2 OS=Saccharomyces cerevisiae (strain ATCC 204508 / S288c) GN=PST2 PE=1 SV=1	2.42537e+07	2.85386e+07	2.82484e+07	2.48717e+07	8.56807e+07	6.86941e+07	8.04369e+07	5.55974e+07	2.04102e+07	3.53024e+07	3.10785e+07	2.75581e+07	7.12191e+07	7.2476e+07	8.71021e+07	4.71422e+07
P37304	7	7	460.82	93100	Protein PAM1 OS=Saccharomyces cerevisiae (strain ATCC 204508 / S288c) GN=PAM1 PE=1 SV=2	882361	806990	887090	763364	1.47837e+06	1.59822e+06	1.34896e+06	1.56944e+06	742533	998251	975963	845813	1.22884e+06	1.68621e+06	1.46074e+06	1.33076e+06
P39518	3	3	216.41	84126	Long-chain-fatty-acid--CoA ligase 2 OS=Saccharomyces cerevisiae (strain ATCC 204508 / S288c) GN=FAA2 PE=1 SV=1	46619	56454.9	44522.4	21240.1	548894	455154	382405	428221	39231.3	69835	48982.9	23534.2	456249	480212	414092	363097
Q12233	2	2	102.15	12970	ATP synthase subunit g, mitochondrial OS=Saccharomyces cerevisiae (strain ATCC 204508 / S288c) GN=ATP20 PE=1 SV=1	1.48555e+06	1.86854e+06	1.84356e+06	2.36087e+06	8.38825e+06	7.45181e+06	4.98709e+06	7.04415e+06	1.25013e+06	2.31139e+06	2.02826e+06	2.61587e+06	6.97244e+06	7.86206e+06	5.40034e+06	5.97288e+06
P38988	8	8	374.82	33252	Mitochondrial GTP/GDP carrier protein 1 OS=Saccharomyces cerevisiae (strain ATCC 204508 / S288c) GN=GGC1 PE=1 SV=1	1.69807e+06	2.20033e+06	1.87642e+06	2.00028e+06	3.4153e+06	3.18224e+06	3.45577e+06	3.37265e+06	1.42898e+06	2.72182e+06	2.06441e+06	2.21633e+06	2.83885e+06	3.35743e+06	3.74212e+06	2.85974e+06
Q07589	4	4	263.2	40043	Uncharacterized protein YDL144C OS=Saccharomyces cerevisiae (strain ATCC 204508 / S288c) GN=YDL144C PE=1 SV=2	438944	336914	417332	476414	928182	800153	811785	901606	369385	416764	459143	527870	771519	844205	879051	764490
Q08818	5	4	268.56	80353	Meiotic sister-chromatid recombination protein 6, mitochondrial OS=Saccharomyces cerevisiae (strain ATCC 204508 / S288c) GN=MSC6 PE=1 SV=1	315174	486219	376879	389667	751691	840249	915962	877765	265229	601455	414637	431754	624817	886508	991861	744275
Q12428	4	4	160.85	57989	Probable 2-methylcitrate dehydratase OS=Saccharomyces cerevisiae (strain ATCC 204508 / S288c) GN=PDH1 PE=1 SV=1	61537	36753.8	41070.9	90876.5	1.6524e+06	1.05947e+06	729397	872153	51785.2	45464.6	45185.6	100692	1.3735e+06	1.1178e+06	789837	739516
Q04660	19	19	1595.8	91933	Ribosome biogenesis protein ERB1 OS=Saccharomyces cerevisiae (strain ATCC 204508 / S288c) GN=ERB1 PE=1 SV=1	5.15634e+06	6.2075e+06	5.64474e+06	5.71068e+06	3.46381e+06	3.56746e+06	3.75919e+06	3.79649e+06	4.33921e+06	7.6787e+06	6.21026e+06	6.32747e+06	2.87917e+06	3.76387e+06	4.07069e+06	3.21912e+06
P31688	23	23	1466.55	103539	Trehalose-phosphatase OS=Saccharomyces cerevisiae (strain ATCC 204508 / S288c) GN=TPS2 PE=1 SV=3	3.58196e+06	3.39646e+06	3.61582e+06	3.23131e+06	7.15101e+06	5.65804e+06	5.74051e+06	5.50211e+06	3.01433e+06	4.20144e+06	3.97807e+06	3.58032e+06	5.94402e+06	5.96954e+06	6.21618e+06	4.66535e+06
P16521	78	62	8805.3	116727	Elongation factor 3A OS=Saccharomyces cerevisiae (strain ATCC 204508 / S288c) GN=YEF3 PE=1 SV=4	6.30709e+08	5.60416e+08	6.09253e+08	6.09415e+08	3.81561e+08	4.5726e+08	3.95664e+08	4.67241e+08	5.30761e+08	6.93237e+08	6.70291e+08	6.75237e+08	3.17159e+08	4.82435e+08	4.2845e+08	3.96183e+08
P53131	26	26	1632.53	87906	Pre-mRNA-splicing factor ATP-dependent RNA helicase PRP43 OS=Saccharomyces cerevisiae (strain ATCC 204508 / S288c) GN=PRP43 PE=1 SV=1	1.2902e+07	1.23421e+07	1.26355e+07	1.24295e+07	9.41962e+06	8.88127e+06	9.60291e+06	9.67977e+06	1.08574e+07	1.52673e+07	1.39014e+07	1.37719e+07	7.82973e+06	9.37022e+06	1.03986e+07	8.20767e+06
P47031	5	3	190.37	82939	Mitochondrial outer membrane protein IML2 OS=Saccharomyces cerevisiae (strain ATCC 204508 / S288c) GN=IML2 PE=1 SV=1	370054	425960	445899	470694	682118	741175	766703	718673	311412	526915	490571	521533	566987	781980	830233	609377
P06775	3	3	195.16	66477	Histidine permease OS=Saccharomyces cerevisiae (strain ATCC 204508 / S288c) GN=HIP1 PE=1 SV=2	531003	667309	488313	595992	49257.2	74599.1	39034.3	114451	446855	825465	537235	660364	40943.3	78706.1	42268.8	97045.2
P22135	4	4	155.05	36759	Protein ATP12, mitochondrial OS=Saccharomyces cerevisiae (strain ATCC 204508 / S288c) GN=ATP12 PE=1 SV=2	220524	238644	230261	239652	502224	519131	446852	522210	185578	295204	253329	265537	417456	547711	483880	442792
P28240	12	11	1298.27	62711	Isocitrate lyase OS=Saccharomyces cerevisiae (strain ATCC 204508 / S288c) GN=ICL1 PE=1 SV=1	841604	1.27913e+06	1.22778e+06	1.17645e+06	6.20511e+06	6.28918e+06	4.93327e+06	3.6963e+06	708235	1.58229e+06	1.35078e+06	1.30352e+06	5.15778e+06	6.63543e+06	5.34206e+06	3.13417e+06
P32891	18	17	1428.11	65935	D-lactate dehydrogenase [cytochrome] 1, mitochondrial OS=Saccharomyces cerevisiae (strain ATCC 204508 / S288c) GN=DLD1 PE=1 SV=2	2.21805e+06	1.90429e+06	1.8762e+06	2.35961e+06	1.28265e+07	7.86137e+06	6.77459e+06	6.64119e+06	1.86656e+06	2.35562e+06	2.06417e+06	2.61447e+06	1.06616e+07	8.29417e+06	7.33595e+06	5.6312e+06
P13517	9	9	804.66	32723	F-actin-capping protein subunit beta OS=Saccharomyces cerevisiae (strain ATCC 204508 / S288c) GN=CAP2 PE=1 SV=3	6.54261e+06	6.48362e+06	5.65391e+06	6.28494e+06	8.8136e+06	9.2569e+06	8.39114e+06	9.22498e+06	5.50581e+06	8.02027e+06	6.22035e+06	6.96376e+06	7.326e+06	9.76653e+06	9.08645e+06	7.82205e+06
P53130	2	2	132.85	14912	Heterotrimeric G protein gamma subunit GPG1 OS=Saccharomyces cerevisiae (strain ATCC 204508 / S288c) GN=GPG1 PE=1 SV=1	11268.5	9968.45	8849.7	9236.79	273943	170659	346684	73159.3	9482.81	12331	9736.31	10234.4	227706	180054	375411	62033.3
Q04894	18	18	1486.65	40162	NADP-dependent alcohol dehydrogenase 6 OS=Saccharomyces cerevisiae (strain ATCC 204508 / S288c) GN=ADH6 PE=1 SV=1	1.88923e+07	1.83188e+07	1.85635e+07	1.72327e+07	2.64928e+07	2.61172e+07	2.57655e+07	2.68759e+07	1.58984e+07	2.26604e+07	2.04232e+07	1.90939e+07	2.20213e+07	2.7555e+07	2.79005e+07	2.27886e+07
Q07551	17	16	1531.83	35595	NADPH-dependent alpha-keto amide reductase OS=Saccharomyces cerevisiae (strain ATCC 204508 / S288c) GN=YDL124W PE=1 SV=1	1.24886e+07	1.23418e+07	1.17124e+07	9.33653e+06	2.97284e+07	2.45508e+07	2.27222e+07	2.01017e+07	1.05096e+07	1.52668e+07	1.28858e+07	1.0345e+07	2.47107e+07	2.59024e+07	2.4605e+07	1.70446e+07
Q12298	5	5	164.9	61666	Uncharacterized ABC transporter ATP-binding protein YDR061W OS=Saccharomyces cerevisiae (strain ATCC 204508 / S288c) GN=YDR061W PE=1 SV=1	1.30446e+06	1.22789e+06	1.23817e+06	1.22247e+06	1.73278e+06	1.74102e+06	1.58159e+06	1.76054e+06	1.09774e+06	1.51891e+06	1.36221e+06	1.35451e+06	1.44031e+06	1.83687e+06	1.71264e+06	1.4928e+06
P17695	9	8	793.8	15965	Glutaredoxin-2, mitochondrial OS=Saccharomyces cerevisiae (strain ATCC 204508 / S288c) GN=GRX2 PE=1 SV=3	4.26119e+06	6.1505e+06	5.96559e+06	5.51813e+06	1.35966e+07	1.11916e+07	1.45933e+07	1.13761e+07	3.58592e+06	7.6082e+06	6.56325e+06	6.11413e+06	1.13017e+07	1.18077e+07	1.58025e+07	9.64603e+06
P32463	3	3	241.93	13991	Acyl carrier protein, mitochondrial OS=Saccharomyces cerevisiae (strain ATCC 204508 / S288c) GN=ACP1 PE=1 SV=1	6.94508e+06	6.9918e+06	7.24971e+06	7.54956e+06	1.13344e+07	9.86344e+06	1.04674e+07	1.1587e+07	5.8445e+06	8.64889e+06	7.97602e+06	8.36498e+06	9.42135e+06	1.04065e+07	1.13348e+07	9.82484e+06
P38333	14	13	829.77	55217	Essential nuclear protein 1 OS=Saccharomyces cerevisiae (strain ATCC 204508 / S288c) GN=ENP1 PE=1 SV=1	5.00654e+06	5.54986e+06	5.79026e+06	5.55196e+06	3.13327e+06	3.31852e+06	3.40008e+06	4.10466e+06	4.21315e+06	6.8652e+06	6.37035e+06	6.15162e+06	2.60442e+06	3.50122e+06	3.68182e+06	3.48043e+06
P07991	21	21	1699.67	46513	Ornithine aminotransferase OS=Saccharomyces cerevisiae (strain ATCC 204508 / S288c) GN=CAR2 PE=1 SV=2	2.36134e+07	2.43787e+07	2.6435e+07	2.56325e+07	6.64948e+07	6.97739e+07	6.87334e+07	5.1655e+07	1.98714e+07	3.01566e+07	2.90834e+07	2.8401e+07	5.52715e+07	7.36152e+07	7.44288e+07	4.37993e+07
P38715	7	7	584.09	37437	NADPH-dependent aldose reductase GRE3 OS=Saccharomyces cerevisiae (strain ATCC 204508 / S288c) GN=GRE3 PE=1 SV=1	3.53343e+06	4.42141e+06	3.70364e+06	4.22226e+06	7.21474e+06	6.72259e+06	6.0161e+06	5.78652e+06	2.97348e+06	5.4693e+06	4.07469e+06	4.67829e+06	5.997e+06	7.0927e+06	6.51461e+06	4.90651e+06
P38427	30	28	2105.43	123341	Trehalose synthase complex regulatory subunit TSL1 OS=Saccharomyces cerevisiae (strain ATCC 204508 / S288c) GN=TSL1 PE=1 SV=1	1.89433e+06	2.24819e+06	3.36228e+06	2.62018e+06	9.73304e+06	7.29128e+06	8.15351e+06	6.21296e+06	1.59414e+06	2.78102e+06	3.69913e+06	2.90318e+06	8.09025e+06	7.6927e+06	8.82912e+06	5.26809e+06
P23585	11	9	1050.77	60429	High-affinity glucose transporter HXT2 OS=Saccharomyces cerevisiae (strain ATCC 204508 / S288c) GN=HXT2 PE=1 SV=1	1.8237e+07	1.9534e+07	2.19906e+07	1.73827e+07	4.60029e+07	5.52948e+07	6.49301e+07	6.52271e+07	1.5347e+07	2.41636e+07	2.41938e+07	1.92602e+07	3.82383e+07	5.8339e+07	7.03104e+07	5.53074e+07
P43598	4	4	203.83	21883	Inhibitor of glycogen debranching 1 OS=Saccharomyces cerevisiae (strain ATCC 204508 / S288c) GN=IGD1 PE=1 SV=1	62441.4	62491.2	35858	83616.5	937064	524523	658134	378026	52546.3	77302	39450.4	92647.8	778902	553401	712668	320536
P33330	18	17	1209.61	43560	Phosphoserine aminotransferase OS=Saccharomyces cerevisiae (strain ATCC 204508 / S288c) GN=SER1 PE=1 SV=1	2.83989e+07	3.12205e+07	2.95576e+07	3.23597e+07	1.79551e+07	2.00588e+07	2.08838e+07	2.02081e+07	2.38985e+07	3.86199e+07	3.25189e+07	3.58548e+07	1.49246e+07	2.11632e+07	2.26143e+07	1.71348e+07
P38958	2	2	66.87	13236	Protein PET100, mitochondrial OS=Saccharomyces cerevisiae (strain ATCC 204508 / S288c) GN=PET100 PE=1 SV=1	88065.8	45976.4	110695	110473	638740	570009	460146	633690	74110	56873	121785	122405	530930	601391	498275	537318
P32892	16	15	1018.7	84848	ATP-dependent RNA helicase DRS1 OS=Saccharomyces cerevisiae (strain ATCC 204508 / S288c) GN=DRS1 PE=1 SV=2	5.3177e+06	5.111e+06	6.406e+06	6.05239e+06	2.86408e+06	3.56515e+06	3.2839e+06	3.67308e+06	4.47501e+06	6.32233e+06	7.04779e+06	6.70609e+06	2.38066e+06	3.76142e+06	3.55601e+06	3.11448e+06
P38345	3	2	316.65	15552	Succinate dehydrogenase assembly factor 4, mitochondrial OS=Saccharomyces cerevisiae (strain ATCC 204508 / S288c) GN=SDH8 PE=1 SV=2	249109	276978	205546	577049	3.08352e+06	2.73786e+06	2.50022e+06	2.45859e+06	209633	342624	226138	639374	2.56306e+06	2.88859e+06	2.7074e+06	2.08469e+06
Q06205	7	4	623.53	43934	FK506-binding protein 4 OS=Saccharomyces cerevisiae (strain ATCC 204508 / S288c) GN=FPR4 PE=1 SV=1	9.99626e+06	1.14976e+07	1.14388e+07	1.05084e+07	6.77927e+06	6.91182e+06	6.72916e+06	7.6059e+06	8.41216e+06	1.42226e+07	1.25848e+07	1.16433e+07	5.63503e+06	7.29235e+06	7.28675e+06	6.4492e+06
Q03201	3	3	165.32	23466	37S ribosomal protein S10, mitochondrial OS=Saccharomyces cerevisiae (strain ATCC 204508 / S288c) GN=RSM10 PE=1 SV=1	333587	283853	335375	450516	873530	960702	779843	870937	280724	351127	368975	499175	726091	1.01359e+06	844463	738485
Q04305	12	11	793.85	57936	U3 small nucleolar RNA-associated protein 15 OS=Saccharomyces cerevisiae (strain ATCC 204508 / S288c) GN=UTP15 PE=1 SV=1	4.63909e+06	4.8725e+06	5.14935e+06	5.03719e+06	2.90315e+06	3.51817e+06	2.7462e+06	3.1091e+06	3.90394e+06	6.0273e+06	5.66523e+06	5.58125e+06	2.41314e+06	3.71186e+06	2.97376e+06	2.63627e+06
P43594	5	5	283.41	18958	MICOS complex subunit MIC19 OS=Saccharomyces cerevisiae (strain ATCC 204508 / S288c) GN=MIC19 PE=1 SV=1	1.20727e+06	1.31666e+06	1.58212e+06	1.86943e+06	3.64071e+06	3.73173e+06	3.69541e+06	3.78469e+06	1.01595e+06	1.62872e+06	1.74063e+06	2.07134e+06	3.02621e+06	3.93718e+06	4.00162e+06	3.20912e+06
P53925	4	4	300.12	74164	Uncharacterized vacuolar membrane protein YNL115C OS=Saccharomyces cerevisiae (strain ATCC 204508 / S288c) GN=YNL115C PE=1 SV=1	276007	227835	253968	214230	719801	503095	489671	557792	232268	281833	279412	237368	598310	530793	530246	472963
P07255	3	3	137.75	6959	Cytochrome c oxidase subunit 7A OS=Saccharomyces cerevisiae (strain ATCC 204508 / S288c) GN=COX9 PE=1 SV=2	974034	776405	997836	1.65394e+06	7.28069e+06	6.57619e+06	5.64759e+06	9.09893e+06	819679	960416	1.0978e+06	1.83258e+06	6.05182e+06	6.93823e+06	6.11556e+06	7.71517e+06
Q12117	3	2	349.07	36737	Protein MRH1 OS=Saccharomyces cerevisiae (strain ATCC 204508 / S288c) GN=MRH1 PE=1 SV=1	3.77902e+07	4.02086e+07	3.60194e+07	3.71065e+07	2.41997e+07	2.67253e+07	2.16868e+07	2.71434e+07	3.18016e+07	4.97383e+07	3.9628e+07	4.11143e+07	2.01151e+07	2.81966e+07	2.34838e+07	2.30154e+07
Q02784	4	4	280.57	17035	Monothiol glutaredoxin-5, mitochondrial OS=Saccharomyces cerevisiae (strain ATCC 204508 / S288c) GN=GRX5 PE=1 SV=1	3.43298e+06	3.7238e+06	3.59879e+06	4.21575e+06	5.99892e+06	6.66229e+06	6.95584e+06	6.55643e+06	2.88896e+06	4.60636e+06	3.95934e+06	4.67109e+06	4.98639e+06	7.02908e+06	7.53222e+06	5.55933e+06
Q04458	5	5	293.44	60340	Fatty aldehyde dehydrogenase HFD1 OS=Saccharomyces cerevisiae (strain ATCC 204508 / S288c) GN=HFD1 PE=1 SV=1	1.08252e+06	1.44069e+06	1.43106e+06	1.46099e+06	4.30274e+06	3.34311e+06	3.54636e+06	2.91227e+06	910970	1.78214e+06	1.57443e+06	1.61879e+06	3.5765e+06	3.52716e+06	3.84022e+06	2.46937e+06
P33421	3	3	110.81	22054	Succinate dehydrogenase [ubiquinone] cytochrome b subunit, mitochondrial OS=Saccharomyces cerevisiae (strain ATCC 204508 / S288c) GN=SDH3 PE=1 SV=1	1.03001e+06	852686	984227	1.31407e+06	5.67659e+06	4.58297e+06	3.68206e+06	3.92028e+06	866785	1.05478e+06	1.08283e+06	1.456e+06	4.71847e+06	4.83529e+06	3.98717e+06	3.32409e+06
P53881	4	4	230.5	35047	54S ribosomal protein L22, mitochondrial OS=Saccharomyces cerevisiae (strain ATCC 204508 / S288c) GN=MRPL22 PE=1 SV=2	386750	322363	281884	379573	1.28262e+06	1.33798e+06	1.03503e+06	1.14233e+06	325461	398765	310125	420570	1.06613e+06	1.41164e+06	1.1208e+06	968601
P32335	5	4	202.87	51076	Protein MSS51, mitochondrial OS=Saccharomyces cerevisiae (strain ATCC 204508 / S288c) GN=MSS51 PE=1 SV=2	399137	431400	382716	461716	1.0238e+06	1.01701e+06	976595	1.25412e+06	335886	533644	421058	511585	850994	1.073e+06	1.05752e+06	1.06339e+06
P53742	8	8	524.11	55739	Nucleolar GTP-binding protein 2 OS=Saccharomyces cerevisiae (strain ATCC 204508 / S288c) GN=NOG2 PE=1 SV=1	5.03608e+06	4.23229e+06	4.88229e+06	5.05377e+06	2.29265e+06	2.67757e+06	2.50547e+06	3.33443e+06	4.23802e+06	5.23536e+06	5.37143e+06	5.59962e+06	1.90568e+06	2.82498e+06	2.71308e+06	2.82733e+06
Q01080	9	8	552.66	46679	DNA-directed RNA polymerase I subunit RPA49 OS=Saccharomyces cerevisiae (strain ATCC 204508 / S288c) GN=RPA49 PE=1 SV=2	6.77555e+06	6.93077e+06	7.34594e+06	7.00436e+06	4.80928e+06	5.24348e+06	5.55191e+06	6.31865e+06	5.70183e+06	8.5734e+06	8.08189e+06	7.76089e+06	3.99754e+06	5.53216e+06	6.01196e+06	5.35771e+06
Q12024	10	10	955.07	51555	Ribosome biogenesis protein YTM1 OS=Saccharomyces cerevisiae (strain ATCC 204508 / S288c) GN=YTM1 PE=1 SV=1	8.09112e+06	7.65102e+06	9.34684e+06	8.91286e+06	4.60312e+06	5.67956e+06	4.99996e+06	6.0204e+06	6.80892e+06	9.46435e+06	1.02833e+07	9.87553e+06	3.82619e+06	5.99225e+06	5.41427e+06	5.10482e+06
P49017	8	8	420.84	34890	2-methoxy-6-polyprenyl-1,4-benzoquinol methylase, mitochondrial OS=Saccharomyces cerevisiae (strain ATCC 204508 / S288c) GN=COQ5 PE=1 SV=1	1.61341e+06	1.59914e+06	1.78987e+06	1.75569e+06	3.36784e+06	3.36361e+06	3.12542e+06	2.42195e+06	1.35773e+06	1.97815e+06	1.96918e+06	1.94532e+06	2.7994e+06	3.54879e+06	3.3844e+06	2.05362e+06
P14065	12	9	766.37	35171	Glycerol 2-dehydrogenase (NADP(+)) OS=Saccharomyces cerevisiae (strain ATCC 204508 / S288c) GN=GCY1 PE=1 SV=1	956858	1.16486e+06	1.38653e+06	1.02215e+06	6.7214e+06	3.49648e+06	4.04977e+06	2.77148e+06	805225	1.44093e+06	1.52544e+06	1.13255e+06	5.58693e+06	3.68898e+06	4.38534e+06	2.34999e+06
P23644	14	12	1331.89	42240	Mitochondrial import receptor subunit TOM40 OS=Saccharomyces cerevisiae (strain ATCC 204508 / S288c) GN=TOM40 PE=1 SV=1	1.3529e+07	1.35175e+07	1.48983e+07	1.51261e+07	2.13313e+07	2.21909e+07	2.16476e+07	2.23205e+07	1.13851e+07	1.67212e+07	1.63909e+07	1.67599e+07	1.77309e+07	2.34126e+07	2.34413e+07	1.8926e+07
P42940	6	6	550.75	28912	Probable electron transfer flavoprotein subunit beta OS=Saccharomyces cerevisiae (strain ATCC 204508 / S288c) GN=CIR1 PE=1 SV=1	3.14742e+06	3.66178e+06	3.55189e+06	3.60121e+06	5.43518e+06	6.41369e+06	5.81198e+06	6.87063e+06	2.64865e+06	4.52964e+06	3.90774e+06	3.99017e+06	4.5178e+06	6.76679e+06	6.29357e+06	5.82575e+06
P53316	6	5	328.01	89742	Uncharacterized RNA-binding protein YGR250C OS=Saccharomyces cerevisiae (strain ATCC 204508 / S288c) GN=YGR250C PE=1 SV=1	245751	197808	159226	190062	591120	482008	470435	530264	206807	244689	175178	210591	491348	508545	509416	449621
P40988	3	2	164.62	63265	Low-affinity Fe(2+) transport protein OS=Saccharomyces cerevisiae (strain ATCC 204508 / S288c) GN=FET4 PE=1 SV=2	627447	889619	868550	1.16479e+06	48003.7	52235.8	64645.3	172452	528016	1.10046e+06	955566	1.29059e+06	39901.4	55111.6	70002	146225
P54861	19	18	1246.51	85489	Dynamin-related protein DNM1 OS=Saccharomyces cerevisiae (strain ATCC 204508 / S288c) GN=DNM1 PE=1 SV=1	2.68099e+06	2.54651e+06	2.64635e+06	2.63383e+06	5.63509e+06	4.92816e+06	4.87841e+06	4.02158e+06	2.25613e+06	3.15005e+06	2.91147e+06	2.91831e+06	4.68397e+06	5.19948e+06	5.28264e+06	3.40998e+06
P28778	2	2	57.82	15011	37S ribosomal protein MRP17, mitochondrial OS=Saccharomyces cerevisiae (strain ATCC 204508 / S288c) GN=MRP17 PE=1 SV=1	57924.9	42896.7	36462.6	49988.2	194322	141289	172840	129182	48745.6	53063.4	40115.6	55387.3	161523	149067	187162	109536
P36035	6	6	311.49	69958	Carboxylic acid transporter protein homolog OS=Saccharomyces cerevisiae (strain ATCC 204508 / S288c) GN=JEN1 PE=1 SV=1	62344	179346	84164.2	72845.1	5.14305e+06	2.10344e+06	1.91691e+06	1.03298e+06	52464.4	221852	92596.3	80713	4.27498e+06	2.21924e+06	2.07575e+06	875889
P0CT04	2	2	167.8	8585	Protease B inhibitor 2 OS=Saccharomyces cerevisiae (strain ATCC 204508 / S288c) GN=PBI2 PE=1 SV=1	4.52049e+06	6.5378e+06	5.79565e+06	6.32342e+06	3.94195e+07	2.48257e+07	2.74128e+07	2.12254e+07	3.80413e+06	8.08729e+06	6.37629e+06	7.0064e+06	3.27661e+07	2.61924e+07	2.96843e+07	1.79975e+07
P08067	10	10	644.55	23635	Cytochrome b-c1 complex subunit Rieske, mitochondrial OS=Saccharomyces cerevisiae (strain ATCC 204508 / S288c) GN=RIP1 PE=1 SV=1	2.76677e+06	2.61141e+06	2.61816e+06	3.88032e+06	1.5804e+07	1.77892e+07	8.66002e+06	1.39798e+07	2.32832e+06	3.23033e+06	2.88047e+06	4.29943e+06	1.31365e+07	1.87686e+07	9.37761e+06	1.18538e+07
P40363	8	8	466.39	34198	S-formylglutathione hydrolase OS=Saccharomyces cerevisiae (strain ATCC 204508 / S288c) GN=YJL068C PE=1 SV=1	3.62914e+06	3.4946e+06	3.41436e+06	3.1311e+06	5.09956e+06	4.78164e+06	4.6348e+06	4.53442e+06	3.05403e+06	4.32284e+06	3.75643e+06	3.46929e+06	4.23883e+06	5.04489e+06	5.01885e+06	3.84483e+06
Q12207	2	2	252.77	19240	Non-classical export protein 2 OS=Saccharomyces cerevisiae (strain ATCC 204508 / S288c) GN=NCE102 PE=1 SV=1	5.43842e+06	4.15204e+06	4.86588e+06	4.45422e+06	5.45903e+06	4.77063e+06	4.81988e+06	4.78363e+06	4.57659e+06	5.13609e+06	5.35337e+06	4.93531e+06	4.53763e+06	5.03327e+06	5.21926e+06	4.05614e+06
P53266	2	2	107.68	45256	Cytochrome oxidase assembly protein SHY1 OS=Saccharomyces cerevisiae (strain ATCC 204508 / S288c) GN=SHY1 PE=1 SV=1	37975.6	40589.5	29263.1	30991.1	176013	136003	180957	144865	31957.6	50209.4	32194.8	34338.4	146304	143490	195952	122834
P50094	28	14	2631.43	56871	Inosine-5'-monophosphate dehydrogenase 4 OS=Saccharomyces cerevisiae (strain ATCC 204508 / S288c) GN=IMD4 PE=1 SV=1	4.19616e+07	4.59173e+07	3.9119e+07	3.77552e+07	1.87258e+07	2.40583e+07	2.10513e+07	2.38437e+07	3.5312e+07	5.67999e+07	4.30382e+07	4.18331e+07	1.55652e+07	2.53828e+07	2.27957e+07	2.02176e+07
P53319	13	2	870.42	54231	6-phosphogluconate dehydrogenase, decarboxylating 2 OS=Saccharomyces cerevisiae (strain ATCC 204508 / S288c) GN=GND2 PE=1 SV=1	57811.5	100110	85921.2	75066.6	227951	204967	185872	197888	48650.1	123837	94529.3	83174.4	189476	216252	201274	167793
P00331	16	10	1265.94	37165	Alcohol dehydrogenase 2 OS=Saccharomyces cerevisiae (strain ATCC 204508 / S288c) GN=ADH2 PE=1 SV=3	1.18033e+07	1.59836e+07	1.4774e+07	1.41406e+07	5.27124e+07	6.81374e+07	5.82378e+07	6.27975e+07	9.9328e+06	1.97718e+07	1.62541e+07	1.56679e+07	4.38153e+07	7.18887e+07	6.30636e+07	5.32473e+07
P32590	17	8	1143.88	77801	Heat shock protein homolog SSE2 OS=Saccharomyces cerevisiae (strain ATCC 204508 / S288c) GN=SSE2 PE=1 SV=3	1.53624e+06	1.37217e+06	1.71638e+06	1.27066e+06	2.75369e+06	2.40985e+06	2.08791e+06	2.23555e+06	1.29279e+06	1.69738e+06	1.88834e+06	1.4079e+06	2.28891e+06	2.54252e+06	2.26092e+06	1.89556e+06
P53733	4	4	122.25	10269	37S ribosomal protein S19, mitochondrial OS=Saccharomyces cerevisiae (strain ATCC 204508 / S288c) GN=RSM19 PE=1 SV=1	363444	473033	462617	481521	1.07461e+06	1.44409e+06	1.29556e+06	1.3216e+06	305849	585144	508965	533529	893234	1.5236e+06	1.40291e+06	1.12061e+06
Q12499	18	17	1804.22	56978	Nucleolar protein 58 OS=Saccharomyces cerevisiae (strain ATCC 204508 / S288c) GN=NOP58 PE=1 SV=1	3.45136e+07	3.86293e+07	3.78679e+07	3.90044e+07	2.57527e+07	2.76682e+07	2.59599e+07	3.16293e+07	2.90443e+07	4.77846e+07	4.16617e+07	4.32172e+07	2.1406e+07	2.91915e+07	2.8111e+07	2.68191e+07
P36059	3	3	94.64	38017	ATP-dependent (S)-NAD(P)H-hydrate dehydratase OS=Saccharomyces cerevisiae (strain ATCC 204508 / S288c) GN=YKL151C PE=1 SV=1	253810	249442	233581	242972	533265	411780	468282	376990	213589	308561	256982	269215	443258	434451	507085	319657
P0CW40;Q08295;P53051	3	2	186.05	68941	Oligo-1,6-glucosidase IMA3 OS=Saccharomyces cerevisiae (strain ATCC 204508 / S288c) GN=IMA3 PE=1 SV=1	84850.8	51217	85091.7	93138.4	609624	694753	557134	402924	71404.5	63355.7	93616.7	103198	506729	733002	603299	341647
P18411	2	2	127.65	22106	Protein FUN14 OS=Saccharomyces cerevisiae (strain ATCC 204508 / S288c) GN=FUN14 PE=1 SV=3	350046	370157	235827	387097	1.33732e+06	1.10014e+06	1.02373e+06	1.03874e+06	294574	457886	259453	428906	1.1116e+06	1.16071e+06	1.10856e+06	880772
Q07807	8	8	541.4	98178	mRNA-binding protein PUF3 OS=Saccharomyces cerevisiae (strain ATCC 204508 / S288c) GN=PUF3 PE=1 SV=1	1.49686e+06	1.98716e+06	1.88921e+06	2.09589e+06	4.88568e+06	4.47715e+06	4.87235e+06	4.35513e+06	1.25965e+06	2.45812e+06	2.07848e+06	2.32226e+06	4.06105e+06	4.72364e+06	5.27609e+06	3.6928e+06
P28000	8	8	786.16	16255	DNA-directed RNA polymerases I and III subunit RPAC2 OS=Saccharomyces cerevisiae (strain ATCC 204508 / S288c) GN=RPC19 PE=1 SV=1	1.52274e+07	1.591e+07	1.43226e+07	1.4563e+07	9.74385e+06	1.14137e+07	1.10777e+07	1.20209e+07	1.28143e+07	1.96807e+07	1.57575e+07	1.61359e+07	8.09923e+06	1.20421e+07	1.19956e+07	1.01927e+07
Q12396	3	3	166.79	51086	Protein EMP46 OS=Saccharomyces cerevisiae (strain ATCC 204508 / S288c) GN=EMP46 PE=1 SV=1	101165	103684	106081	89005.9	355615	259491	291237	233895	85133.1	128258	116709	98619.2	295592	273778	315370	198325
P39965	3	3	188.14	66693	Probable proline--tRNA ligase, mitochondrial OS=Saccharomyces cerevisiae (strain ATCC 204508 / S288c) GN=AIM10 PE=1 SV=1	191215	132426	219927	207387	661774	625350	661717	542934	160913	163812	241960	229787	550076	659778	716549	460365
P49573	8	8	675.3	44811	Copper transport protein CTR1 OS=Saccharomyces cerevisiae (strain ATCC 204508 / S288c) GN=CTR1 PE=1 SV=1	4.65257e+06	5.18199e+06	3.43292e+06	4.90424e+06	8.37439e+06	1.11548e+07	1.06124e+07	1.29262e+07	3.91528e+06	6.41015e+06	3.77684e+06	5.43394e+06	6.96092e+06	1.17689e+07	1.14918e+07	1.09604e+07
P04037	6	5	552.01	17360	Cytochrome c oxidase subunit 4, mitochondrial OS=Saccharomyces cerevisiae (strain ATCC 204508 / S288c) GN=COX4 PE=1 SV=1	5.99395e+06	5.42052e+06	5.2625e+06	6.80935e+06	3.64713e+07	3.12118e+07	2.15647e+07	2.45718e+07	5.04409e+06	6.70521e+06	5.78972e+06	7.54481e+06	3.03155e+07	3.29301e+07	2.33516e+07	2.08349e+07
P27929	3	3	115.28	56492	37S ribosomal protein NAM9, mitochondrial OS=Saccharomyces cerevisiae (strain ATCC 204508 / S288c) GN=NAM9 PE=1 SV=2	182408	129542	170597	259131	530221	506418	509779	494186	153502	160244	187688	287119	440727	534299	552020	419030
P21801	11	11	727.91	31066	Succinate dehydrogenase [ubiquinone] iron-sulfur subunit, mitochondrial OS=Saccharomyces cerevisiae (strain ATCC 204508 / S288c) GN=SDH2 PE=1 SV=1	2.49328e+06	2.96565e+06	2.65873e+06	3.05939e+06	1.41529e+07	1.24662e+07	9.62412e+06	9.67277e+06	2.09817e+06	3.66852e+06	2.9251e+06	3.38983e+06	1.17641e+07	1.31526e+07	1.04216e+07	8.20174e+06
P04051	12	11	757.06	163567	DNA-directed RNA polymerase III subunit RPC1 OS=Saccharomyces cerevisiae (strain ATCC 204508 / S288c) GN=RPO31 PE=1 SV=1	2.19726e+06	2.00315e+06	2.06661e+06	1.92e+06	1.29538e+06	1.55416e+06	1.54618e+06	1.53508e+06	1.84906e+06	2.47791e+06	2.27365e+06	2.12737e+06	1.07674e+06	1.63973e+06	1.6743e+06	1.30163e+06
Q99321	3	3	144.17	21787	Diphosphoinositol polyphosphate phosphohydrolase DDP1 OS=Saccharomyces cerevisiae (strain ATCC 204508 / S288c) GN=DDP1 PE=1 SV=3	456715	502736	396974	445754	851833	834934	823725	928137	384340	621887	436745	493899	708056	880901	891981	786987
P27472	18	14	1262.19	80428	Glycogen [starch] synthase isoform 2 OS=Saccharomyces cerevisiae (strain ATCC 204508 / S288c) GN=GSY2 PE=1 SV=3	9.28154e+06	1.0086e+07	1.02621e+07	9.1678e+06	1.73389e+07	1.96367e+07	1.52752e+07	1.64942e+07	7.81069e+06	1.24764e+07	1.12902e+07	1.0158e+07	1.44124e+07	2.07178e+07	1.65409e+07	1.39858e+07
P36046	9	9	741.55	44966	Mitochondrial intermembrane space import and assembly protein 40 OS=Saccharomyces cerevisiae (strain ATCC 204508 / S288c) GN=MIA40 PE=1 SV=2	4.7122e+06	4.74057e+06	4.15094e+06	3.84436e+06	8.12377e+06	7.27976e+06	7.41191e+06	8.41432e+06	3.96546e+06	5.8641e+06	4.5668e+06	4.25958e+06	6.7526e+06	7.68054e+06	8.02608e+06	7.13467e+06
P37012	19	17	1538.15	63391	Phosphoglucomutase 2 OS=Saccharomyces cerevisiae (strain ATCC 204508 / S288c) GN=PGM2 PE=1 SV=1	6.99636e+06	5.52614e+06	9.74284e+06	6.35089e+06	3.84229e+07	2.54364e+07	2.98653e+07	1.75194e+07	5.88765e+06	6.83586e+06	1.07189e+07	7.03684e+06	3.19377e+07	2.68368e+07	3.234e+07	1.48551e+07
Q06678	3	3	214.12	42855	54S ribosomal protein L35, mitochondrial OS=Saccharomyces cerevisiae (strain ATCC 204508 / S288c) GN=MRPL35 PE=1 SV=1	759409	463228	616846	730635	1.68595e+06	1.88572e+06	2.00082e+06	1.36565e+06	639065	573015	678645	809549	1.40139e+06	1.98954e+06	2.16662e+06	1.15796e+06
P48234	6	6	668.92	81969	Ribosome biogenesis protein ENP2 OS=Saccharomyces cerevisiae (strain ATCC 204508 / S288c) GN=ENP2 PE=1 SV=2	3.58219e+06	3.6407e+06	3.75819e+06	2.87579e+06	2.32848e+06	2.25102e+06	1.93246e+06	2.547e+06	3.01452e+06	4.50356e+06	4.13471e+06	3.1864e+06	1.93547e+06	2.37494e+06	2.09258e+06	2.15966e+06
P36006	12	8	881.6	142933	Myosin-3 OS=Saccharomyces cerevisiae (strain ATCC 204508 / S288c) GN=MYO3 PE=1 SV=4	929313	1.0915e+06	918516	1.22734e+06	1.81343e+06	1.64328e+06	1.66954e+06	1.67621e+06	782045	1.35019e+06	1.01054e+06	1.3599e+06	1.50735e+06	1.73375e+06	1.80788e+06	1.42129e+06
Q01976	6	6	284.66	26299	ADP-ribose pyrophosphatase OS=Saccharomyces cerevisiae (strain ATCC 204508 / S288c) GN=YSA1 PE=1 SV=2	7.91477e+06	7.74294e+06	8.49422e+06	7.58603e+06	1.18964e+07	1.21373e+07	1.21627e+07	9.47292e+06	6.66051e+06	9.57805e+06	9.34522e+06	8.40539e+06	9.88844e+06	1.28055e+07	1.31706e+07	8.03228e+06
P11914	6	6	353.23	53646	Mitochondrial-processing peptidase subunit alpha OS=Saccharomyces cerevisiae (strain ATCC 204508 / S288c) GN=MAS2 PE=1 SV=1	1.58218e+06	1.25794e+06	1.25744e+06	1.21786e+06	2.51044e+06	2.21902e+06	2.13807e+06	2.55959e+06	1.33145e+06	1.55608e+06	1.38342e+06	1.3494e+06	2.08671e+06	2.34119e+06	2.31523e+06	2.17033e+06
P38314	6	6	319.33	57494	Protein SDS24 OS=Saccharomyces cerevisiae (strain ATCC 204508 / S288c) GN=SDS24 PE=1 SV=1	1.13236e+06	1.10485e+06	1.53339e+06	1.09923e+06	2.95793e+06	2.34678e+06	2.85894e+06	2.06234e+06	952916	1.36671e+06	1.68701e+06	1.21795e+06	2.45868e+06	2.47598e+06	3.09584e+06	1.7487e+06
P36144	3	2	190.44	31824	Ribosome biogenesis protein UTP30 OS=Saccharomyces cerevisiae (strain ATCC 204508 / S288c) GN=UTP30 PE=1 SV=1	1.2678e+06	1.44305e+06	1.58283e+06	1.50791e+06	573285	636489	703553	787080	1.06689e+06	1.78506e+06	1.74141e+06	1.67078e+06	476523	671531	761851	667381
P17064	3	3	181.09	58563	Purine-cytosine permease FCY2 OS=Saccharomyces cerevisiae (strain ATCC 204508 / S288c) GN=FCY2 PE=1 SV=2	734824	730085	1.15694e+06	949477	585094	496779	531881	299744	618377	903119	1.27284e+06	1.05203e+06	486339	524129	575953	254159
Q96VH4	5	5	251.25	20981	Putative nitroreductase HBN1 OS=Saccharomyces cerevisiae (strain ATCC 204508 / S288c) GN=HBN1 PE=1 SV=1	397679	500869	272439	322756	3.59719e+06	3.3945e+06	4.15861e+06	1.67838e+06	334659	619577	299733	357616	2.99004e+06	3.58138e+06	4.5032e+06	1.42313e+06
Q03860	2	2	60.42	15928	Golgi apparatus membrane protein TVP15 OS=Saccharomyces cerevisiae (strain ATCC 204508 / S288c) GN=TVP15 PE=1 SV=1	1.03168e+06	884951	900919	1.07355e+06	2.66813e+06	2.25777e+06	2.07591e+06	2.16636e+06	868187	1.09469e+06	991178	1.1895e+06	2.21779e+06	2.38207e+06	2.24792e+06	1.8369e+06
P36775	15	15	959.68	127432	Lon protease homolog, mitochondrial OS=Saccharomyces cerevisiae (strain ATCC 204508 / S288c) GN=PIM1 PE=1 SV=2	1.89913e+06	1.9648e+06	1.93453e+06	2.27947e+06	3.75058e+06	3.50423e+06	3.63954e+06	4.57736e+06	1.59817e+06	2.43047e+06	2.12834e+06	2.52567e+06	3.11754e+06	3.69716e+06	3.94112e+06	3.88123e+06
Q08230	2	2	143.67	19087	Succinate dehydrogenase assembly factor 2, mitochondrial OS=Saccharomyces cerevisiae (strain ATCC 204508 / S288c) GN=SDH5 PE=1 SV=1	69786.5	75699.8	128156	89649.7	457604	295715	468896	397512	58727.4	93641	140995	99332.6	380367	311995	507750	337059
P53912;P25608	13	13	964.05	41367	Uncharacterized protein YNL134C OS=Saccharomyces cerevisiae (strain ATCC 204508 / S288c) GN=YNL134C PE=1 SV=1	4.30816e+06	4.94436e+06	6.15666e+06	5.15795e+06	1.16895e+07	1.07971e+07	1.40322e+07	1.02026e+07	3.62545e+06	6.1162e+06	6.77347e+06	5.71505e+06	9.71652e+06	1.13915e+07	1.51949e+07	8.65096e+06
P36156	5	5	208.06	43418	Glutathione S-transferase omega-like 2 OS=Saccharomyces cerevisiae (strain ATCC 204508 / S288c) GN=ECM4 PE=1 SV=1	103488	125565	144118	106828	967737	628506	732719	337038	87088.4	155325	158556	118367	804397	663108	793434	285782
O60200	3	3	168.94	9934	Mitochondrial distribution and morphology protein 35 OS=Saccharomyces cerevisiae (strain ATCC 204508 / S288c) GN=MDM35 PE=1 SV=3	117430	169979	160163	194450	651759	510065	549211	371710	98821.3	210265	176209	215452	541752	538147	594720	315180
P42847	3	3	153.14	24662	37S ribosomal protein S18, mitochondrial OS=Saccharomyces cerevisiae (strain ATCC 204508 / S288c) GN=MRPS18 PE=1 SV=2	299127	252745	379623	336987	1.15184e+06	1.06233e+06	914404	1.85694e+06	251725	312647	417655	373384	957429	1.12081e+06	990174	1.57454e+06
P36520	4	4	119.28	36325	54S ribosomal protein L10, mitochondrial OS=Saccharomyces cerevisiae (strain ATCC 204508 / S288c) GN=MRPL10 PE=1 SV=2	195266	174184	234177	190520	451124	536603	522451	435164	164322	215467	257638	211098	374981	566145	565742	368984
P07213	26	25	1795.09	70251	Mitochondrial import receptor subunit TOM70 OS=Saccharomyces cerevisiae (strain ATCC 204508 / S288c) GN=TOM70 PE=1 SV=2	9.70415e+06	9.26605e+06	1.03025e+07	1.00338e+07	1.52428e+07	1.43631e+07	1.35771e+07	1.49493e+07	8.16633e+06	1.14622e+07	1.13346e+07	1.11175e+07	1.267e+07	1.51539e+07	1.47021e+07	1.26758e+07
Q06485	2	2	143.95	20559	Autophagy-related protein 33 OS=Saccharomyces cerevisiae (strain ATCC 204508 / S288c) GN=ATG33 PE=1 SV=1	2.63187e+06	2.48761e+06	2.27289e+06	2.33309e+06	6.0762e+06	5.13574e+06	4.63709e+06	4.48686e+06	2.21479e+06	3.07718e+06	2.5006e+06	2.58508e+06	5.05063e+06	5.41848e+06	5.02133e+06	3.8045e+06
P38344	5	4	180.69	46233	Cytoplasmic 60S subunit biogenesis factor REI1 OS=Saccharomyces cerevisiae (strain ATCC 204508 / S288c) GN=REI1 PE=1 SV=3	960809	997082	1.03495e+06	971126	356466	459396	507830	572485	808550	1.2334e+06	1.13864e+06	1.07602e+06	296300	484688	549910	485422
P20107	5	5	564.25	48600	Zinc/cadmium resistance protein OS=Saccharomyces cerevisiae (strain ATCC 204508 / S288c) GN=ZRC1 PE=1 SV=2	1.0263e+07	9.58523e+06	9.55713e+06	1.11525e+07	6.87616e+06	7.77812e+06	6.84517e+06	7.23782e+06	8.63664e+06	1.1857e+07	1.05146e+07	1.2357e+07	5.71557e+06	8.20634e+06	7.41238e+06	6.1371e+06
P39523	3	3	187.87	105849	Uncharacterized protein YMR124W OS=Saccharomyces cerevisiae (strain ATCC 204508 / S288c) GN=YMR124W PE=1 SV=2	138214	172412	123612	135983	249467	277582	251468	262404	116311	213275	135996	150671	207361	292864	272305	222497
P38759	3	3	125.6	31278	Vacuolar protein sorting-associated protein 29 OS=Saccharomyces cerevisiae (strain ATCC 204508 / S288c) GN=VPS29 PE=1 SV=1	600466	616144	592115	720239	1.22233e+06	1.29047e+06	1.02101e+06	1.10659e+06	505310	762173	651437	798030	1.01602e+06	1.36152e+06	1.10562e+06	938300
Q06132	5	5	280.24	103074	Suppressor of glycerol defect protein 1 OS=Saccharomyces cerevisiae (strain ATCC 204508 / S288c) GN=SGD1 PE=1 SV=1	710972	783335	759923	721231	385101	411226	472058	470796	598304	968989	836056	799129	320102	433866	511174	399197
Q99216	7	7	487.78	30313	Pre-rRNA-processing protein PNO1 OS=Saccharomyces cerevisiae (strain ATCC 204508 / S288c) GN=PNO1 PE=1 SV=1	2.24916e+06	2.39064e+06	2.73857e+06	2.72562e+06	748678	984601	870439	1.31074e+06	1.89273e+06	2.95723e+06	3.01293e+06	3.02001e+06	622313	1.03881e+06	942566	1.11141e+06
Q03195	23	22	1160.14	69095	Translation initiation factor RLI1 OS=Saccharomyces cerevisiae (strain ATCC 204508 / S288c) GN=RLI1 PE=1 SV=1	1.47975e+07	1.53171e+07	1.44215e+07	1.63603e+07	9.84639e+06	1.1706e+07	1.00376e+07	1.13896e+07	1.24526e+07	1.89473e+07	1.58663e+07	1.81274e+07	8.18447e+06	1.23505e+07	1.08693e+07	9.65751e+06
P38882	8	7	559.75	65573	U3 small nucleolar RNA-associated protein 9 OS=Saccharomyces cerevisiae (strain ATCC 204508 / S288c) GN=UTP9 PE=1 SV=1	2.8299e+06	2.64982e+06	2.8258e+06	2.82188e+06	1.75103e+06	1.87684e+06	2.00699e+06	1.88421e+06	2.38145e+06	3.27784e+06	3.1089e+06	3.12666e+06	1.45548e+06	1.98017e+06	2.17329e+06	1.59766e+06
P80967	2	2	200.48	5981	Mitochondrial import receptor subunit TOM5 OS=Saccharomyces cerevisiae (strain ATCC 204508 / S288c) GN=TOM5 PE=1 SV=1	6.8981e+06	5.5475e+06	5.97288e+06	5.33527e+06	9.8115e+06	9.74082e+06	1.01239e+07	9.7538e+06	5.80496e+06	6.86228e+06	6.57127e+06	5.91152e+06	8.15546e+06	1.02771e+07	1.09628e+07	8.27044e+06
Q99207	11	11	587.89	94415	Nucleolar complex protein 14 OS=Saccharomyces cerevisiae (strain ATCC 204508 / S288c) GN=NOP14 PE=1 SV=1	2.17983e+06	2.27508e+06	2.31799e+06	2.30946e+06	1.38485e+06	1.40939e+06	1.40245e+06	1.77343e+06	1.83439e+06	2.81429e+06	2.55022e+06	2.5589e+06	1.15111e+06	1.48698e+06	1.51866e+06	1.50373e+06
P47137	4	4	170.23	32666	Uncharacterized oxidoreductase YJR096W OS=Saccharomyces cerevisiae (strain ATCC 204508 / S288c) GN=YJR096W PE=1 SV=1	264786	305520	372031	203181	775432	483285	482258	491138	222825	377930	409303	225126	644551	509892	522219	416446
P38361	3	3	187.73	62899	Phosphate permease PHO89 OS=Saccharomyces cerevisiae (strain ATCC 204508 / S288c) GN=PHO89 PE=1 SV=1	20974	16311.5	36310.3	28075.3	888839	1.18969e+06	2.19807e+06	3.6908e+06	17650.3	20177.5	39948.1	31107.7	738817	1.25519e+06	2.3802e+06	3.12951e+06
Q12377	10	10	824.52	50085	26S proteasome regulatory subunit RPN6 OS=Saccharomyces cerevisiae (strain ATCC 204508 / S288c) GN=RPN6 PE=1 SV=3	6.14416e+06	6.4214e+06	5.75017e+06	6.45446e+06	8.63851e+06	7.28064e+06	8.46753e+06	8.00622e+06	5.17049e+06	7.9433e+06	6.32625e+06	7.15159e+06	7.18046e+06	7.68147e+06	9.16917e+06	6.78864e+06
P38616	4	4	335.82	37419	Protein YGP1 OS=Saccharomyces cerevisiae (strain ATCC 204508 / S288c) GN=YGP1 PE=1 SV=2	899641	1.311e+06	1.31382e+06	1.57105e+06	2.614e+06	1.80643e+06	2.3383e+06	1.51657e+06	757075	1.62172e+06	1.44544e+06	1.74073e+06	2.1728e+06	1.90588e+06	2.53205e+06	1.28593e+06
P34730	23	4	2039.56	31099	Protein BMH2 OS=Saccharomyces cerevisiae (strain ATCC 204508 / S288c) GN=BMH2 PE=1 SV=3	5.28571e+07	6.13633e+07	5.73828e+07	6.19075e+07	8.7409e+07	9.25354e+07	8.59464e+07	8.81934e+07	4.44808e+07	7.59067e+07	6.31317e+07	6.8594e+07	7.26557e+07	9.76299e+07	9.30681e+07	7.4781e+07
P12630	6	6	391.03	64203	Barrierpepsin OS=Saccharomyces cerevisiae (strain ATCC 204508 / S288c) GN=BAR1 PE=1 SV=1	2.66903e+06	2.72589e+06	2.35037e+06	2.35707e+06	1.42995e+06	1.37692e+06	1.3238e+06	1.38534e+06	2.24607e+06	3.37193e+06	2.58584e+06	2.61165e+06	1.1886e+06	1.45273e+06	1.4335e+06	1.17466e+06
Q03103	7	7	433.15	65789	Endoplasmic oxidoreductin-1 OS=Saccharomyces cerevisiae (strain ATCC 204508 / S288c) GN=ERO1 PE=1 SV=1	4.00082e+06	4.07625e+06	3.88676e+06	4.22071e+06	2.5415e+06	2.59656e+06	2.49607e+06	3.20699e+06	3.36681e+06	5.04234e+06	4.27615e+06	4.67658e+06	2.11253e+06	2.73951e+06	2.7029e+06	2.71927e+06
P33399	14	13	839.42	32198	La protein homolog OS=Saccharomyces cerevisiae (strain ATCC 204508 / S288c) GN=LHP1 PE=1 SV=2	1.29654e+07	1.47869e+07	1.19143e+07	1.19002e+07	7.45503e+06	8.2065e+06	8.25956e+06	9.17568e+06	1.09108e+07	1.82915e+07	1.31079e+07	1.31855e+07	6.19674e+06	8.65831e+06	8.94397e+06	7.78025e+06
Q06625	24	24	1646.75	176002	Glycogen debranching enzyme OS=Saccharomyces cerevisiae (strain ATCC 204508 / S288c) GN=GDB1 PE=1 SV=1	4275.63	67223.2	29244	67162.7	4.53406e+06	2.22509e+06	2.33014e+06	3.13917e+06	3598.07	83155.5	32173.9	74416.8	3.76878e+06	2.34759e+06	2.52322e+06	2.66176e+06
P53843	4	3	127.83	34702	Vacuolar protein sorting-associated protein IST1 OS=Saccharomyces cerevisiae (strain ATCC 204508 / S288c) GN=IST1 PE=1 SV=1	629205	604912	624449	627015	904580	886688	907216	890958	529495	748279	687010	694737	751900	935504	982390	755462
P32775	16	15	1198.6	81235	1,4-alpha-glucan-branching enzyme OS=Saccharomyces cerevisiae (strain ATCC 204508 / S288c) GN=GLC3 PE=1 SV=2	1.10483e+06	1.2805e+06	1.45646e+06	1.08762e+06	1.08235e+07	8.34144e+06	7.44631e+06	4.59258e+06	929748	1.58399e+06	1.60238e+06	1.20509e+06	8.99666e+06	8.80067e+06	8.06333e+06	3.89415e+06
Q12480	10	10	671.46	37122	Probable electron transfer flavoprotein subunit alpha, mitochondrial OS=Saccharomyces cerevisiae (strain ATCC 204508 / S288c) GN=AIM45 PE=1 SV=1	5.13911e+06	5.61904e+06	5.23122e+06	6.06996e+06	1.13127e+07	9.45535e+06	1.03877e+07	9.90084e+06	4.32471e+06	6.95078e+06	5.75531e+06	6.72557e+06	9.40329e+06	9.97591e+06	1.12485e+07	8.39512e+06
Q00764	14	14	1425.11	56341	Alpha,alpha-trehalose-phosphate synthase [UDP-forming] 56 kDa subunit OS=Saccharomyces cerevisiae (strain ATCC 204508 / S288c) GN=TPS1 PE=1 SV=2	5.03283e+06	5.69732e+06	6.05314e+06	5.72868e+06	1.32379e+07	1.12733e+07	1.13824e+07	1.03103e+07	4.23528e+06	7.04761e+06	6.65957e+06	6.34743e+06	1.10035e+07	1.18939e+07	1.23255e+07	8.74229e+06
P00427	9	8	650.97	17388	Cytochrome c oxidase subunit 6, mitochondrial OS=Saccharomyces cerevisiae (strain ATCC 204508 / S288c) GN=COX6 PE=1 SV=1	2.8249e+06	3.89686e+06	4.15645e+06	5.39185e+06	1.52581e+07	1.94367e+07	1.62981e+07	1.77408e+07	2.37724e+06	4.82044e+06	4.57287e+06	5.97422e+06	1.26827e+07	2.05068e+07	1.76486e+07	1.50428e+07
P33302;P51533	42	34	3382.67	171925	Pleiotropic ABC efflux transporter of multiple drugs OS=Saccharomyces cerevisiae (strain ATCC 204508 / S288c) GN=PDR5 PE=1 SV=1	2.05896e+07	2.05517e+07	1.88407e+07	2.11629e+07	7.76222e+06	1.28643e+07	8.20516e+06	1.1978e+07	1.73268e+07	2.54225e+07	2.07283e+07	2.34487e+07	6.45207e+06	1.35726e+07	8.88506e+06	1.01564e+07
P28495	11	10	562.01	30795	F-actin-capping protein subunit alpha OS=Saccharomyces cerevisiae (strain ATCC 204508 / S288c) GN=CAP1 PE=1 SV=1	5.40909e+06	6.17706e+06	5.68292e+06	5.74133e+06	7.74523e+06	7.76319e+06	8.16127e+06	6.90275e+06	4.55191e+06	7.64106e+06	6.25227e+06	6.36144e+06	6.43795e+06	8.19058e+06	8.83753e+06	5.85299e+06
Q02931	19	19	1196.15	101516	NET1-associated nuclear protein 1 OS=Saccharomyces cerevisiae (strain ATCC 204508 / S288c) GN=NAN1 PE=1 SV=1	3.96124e+06	4.12424e+06	4.07865e+06	4.40777e+06	2.58021e+06	2.80026e+06	2.84883e+06	3.33381e+06	3.3335e+06	5.1017e+06	4.48727e+06	4.88384e+06	2.14471e+06	2.95443e+06	3.0849e+06	2.8268e+06
Q03028	5	5	341.96	34298	Mitochondrial 2-oxodicarboxylate carrier 1 OS=Saccharomyces cerevisiae (strain ATCC 204508 / S288c) GN=ODC1 PE=1 SV=1	1.18262e+06	590979	785710	610909	3.13235e+06	3.33518e+06	2.90551e+06	2.671e+06	995211	731044	864427	676892	2.60366e+06	3.51879e+06	3.14627e+06	2.2648e+06
P22138	32	31	2017.77	136682	DNA-directed RNA polymerase I subunit RPA135 OS=Saccharomyces cerevisiae (strain ATCC 204508 / S288c) GN=RPA135 PE=1 SV=1	1.57559e+07	1.52912e+07	1.51738e+07	1.41611e+07	8.84608e+06	1.13781e+07	1.15285e+07	9.09979e+06	1.32591e+07	1.89153e+07	1.6694e+07	1.56907e+07	7.353e+06	1.20045e+07	1.24838e+07	7.7159e+06
P38281	7	6	443.9	36249	Actin patches distal protein 1 OS=Saccharomyces cerevisiae (strain ATCC 204508 / S288c) GN=APD1 PE=1 SV=1	2.33302e+06	2.6738e+06	2.53494e+06	2.46135e+06	3.7406e+06	3.49933e+06	3.46717e+06	3.36726e+06	1.96331e+06	3.3075e+06	2.7889e+06	2.7272e+06	3.10924e+06	3.69198e+06	3.75447e+06	2.85517e+06
Q12389	16	15	938.57	112990	ATP-dependent RNA helicase DBP10 OS=Saccharomyces cerevisiae (strain ATCC 204508 / S288c) GN=DBP10 PE=1 SV=2	1.87627e+06	1.92904e+06	2.08157e+06	1.77547e+06	1.32761e+06	1.54339e+06	1.4206e+06	1.36128e+06	1.57894e+06	2.38623e+06	2.29011e+06	1.96724e+06	1.10353e+06	1.62837e+06	1.53831e+06	1.15426e+06
P10962	4	4	309.51	36016	Protein MAK16 OS=Saccharomyces cerevisiae (strain ATCC 204508 / S288c) GN=MAK16 PE=1 SV=2	2.63672e+06	2.65192e+06	2.95707e+06	2.63419e+06	1.41372e+06	1.48576e+06	1.6404e+06	1.98915e+06	2.21888e+06	3.28043e+06	3.25332e+06	2.9187e+06	1.1751e+06	1.56756e+06	1.77633e+06	1.68664e+06
P53885	5	5	531.95	40254	Signal transduction protein MDG1 OS=Saccharomyces cerevisiae (strain ATCC 204508 / S288c) GN=MDG1 PE=1 SV=1	621190	802627	992395	945392	2.76511e+06	2.38468e+06	2.23082e+06	1.87114e+06	522750	992854	1.09182e+06	1.0475e+06	2.2984e+06	2.51597e+06	2.41567e+06	1.58658e+06
P25349	7	7	804.19	26505	Flavoprotein-like protein YCP4 OS=Saccharomyces cerevisiae (strain ATCC 204508 / S288c) GN=YCP4 PE=1 SV=1	1.73406e+07	1.87045e+07	1.67675e+07	1.65046e+07	3.62318e+07	2.68451e+07	2.88511e+07	2.62557e+07	1.45926e+07	2.31376e+07	1.84474e+07	1.82872e+07	3.01164e+07	2.83231e+07	3.12418e+07	2.22627e+07
P47912	17	16	1058.32	77902	Long-chain-fatty-acid--CoA ligase 4 OS=Saccharomyces cerevisiae (strain ATCC 204508 / S288c) GN=FAA4 PE=1 SV=1	1.14222e+07	1.28752e+07	1.1678e+07	1.2451e+07	6.34403e+06	6.85505e+06	5.96517e+06	8.6232e+06	9.61215e+06	1.59267e+07	1.28479e+07	1.37959e+07	5.27325e+06	7.23245e+06	6.45946e+06	7.31179e+06
Q01802	5	4	274.48	52219	Aspartate aminotransferase, mitochondrial OS=Saccharomyces cerevisiae (strain ATCC 204508 / S288c) GN=AAT1 PE=1 SV=2	565571	473110	670798	567190	194688	283207	204440	300133	475945	585239	738002	628451	161828	298798	221380	254489
Q08742	6	4	314.15	16744	Thiosulfate sulfurtransferase RDL2, mitochondrial OS=Saccharomyces cerevisiae (strain ATCC 204508 / S288c) GN=RDL2 PE=1 SV=1	2.1812e+06	2.42243e+06	2.79903e+06	2.78643e+06	4.35176e+06	5.19783e+06	5.15244e+06	5.23389e+06	1.83554e+06	2.99656e+06	3.07945e+06	3.08738e+06	3.61725e+06	5.484e+06	5.57939e+06	4.43792e+06
P38310	4	4	211.26	51786	Iron transporter FTH1 OS=Saccharomyces cerevisiae (strain ATCC 204508 / S288c) GN=FTH1 PE=1 SV=2	532904	592192	599781	612368	759953	931902	917018	893014	448455	732544	659870	678508	631685	983207	993004	757205
P38137	12	12	712.41	60735	Peroxisomal-coenzyme A synthetase OS=Saccharomyces cerevisiae (strain ATCC 204508 / S288c) GN=PCS60 PE=1 SV=1	4.01569e+06	3.87576e+06	4.13952e+06	3.78139e+06	5.5645e+06	6.83459e+06	5.2246e+06	6.47075e+06	3.37933e+06	4.79434e+06	4.55424e+06	4.18981e+06	4.6253e+06	7.21086e+06	5.65752e+06	5.48668e+06
P22943	6	6	672.87	11686	12 kDa heat shock protein OS=Saccharomyces cerevisiae (strain ATCC 204508 / S288c) GN=HSP12 PE=1 SV=1	2.00017e+06	2.20681e+06	2.40539e+06	2.25188e+06	3.9684e+07	1.82482e+07	2.13547e+07	2.16273e+07	1.68321e+06	2.72983e+06	2.64637e+06	2.4951e+06	3.2986e+07	1.92528e+07	2.31242e+07	1.83382e+07
P32476	9	8	483.59	55490	Squalene monooxygenase OS=Saccharomyces cerevisiae (strain ATCC 204508 / S288c) GN=ERG1 PE=1 SV=2	5.44342e+06	4.95225e+06	5.70267e+06	5.39819e+06	1.33259e+06	1.78713e+06	1.17414e+06	2.33092e+06	4.5808e+06	6.12596e+06	6.274e+06	5.98123e+06	1.10767e+06	1.88552e+06	1.27144e+06	1.97644e+06
P40069	34	33	3096.93	123038	Importin subunit beta-4 OS=Saccharomyces cerevisiae (strain ATCC 204508 / S288c) GN=KAP123 PE=1 SV=1	6.95235e+07	6.55227e+07	5.77455e+07	5.95988e+07	4.74641e+07	4.64468e+07	4.48099e+07	5.10613e+07	5.85061e+07	8.10518e+07	6.35307e+07	6.60359e+07	3.94528e+07	4.90039e+07	4.85229e+07	4.32959e+07
Q12460	25	25	2220.86	57057	Nucleolar protein 56 OS=Saccharomyces cerevisiae (strain ATCC 204508 / S288c) GN=NOP56 PE=1 SV=1	5.88021e+07	6.42149e+07	6.71645e+07	6.56413e+07	4.44946e+07	4.88553e+07	4.8238e+07	5.17371e+07	4.94838e+07	7.94341e+07	7.38934e+07	7.27311e+07	3.69846e+07	5.1545e+07	5.22351e+07	4.38689e+07
P28319	9	9	923.17	24254	Cell wall protein CWP1 OS=Saccharomyces cerevisiae (strain ATCC 204508 / S288c) GN=CWP1 PE=1 SV=2	2.18397e+07	2.32153e+07	1.79078e+07	1.63439e+07	5.18395e+07	4.4802e+07	5.18525e+07	3.74529e+07	1.83787e+07	2.87175e+07	1.97019e+07	1.81092e+07	4.30898e+07	4.72686e+07	5.61492e+07	3.17571e+07
Q01519	3	3	288.5	10010	Cytochrome c oxidase subunit 6B OS=Saccharomyces cerevisiae (strain ATCC 204508 / S288c) GN=COX12 PE=1 SV=2	3.24879e+06	1.74195e+06	2.5133e+06	3.25424e+06	1.54325e+07	1.33647e+07	1.03066e+07	1.30581e+07	2.73395e+06	2.1548e+06	2.76509e+06	3.60572e+06	1.28277e+07	1.41005e+07	1.11607e+07	1.10722e+07
P20051	12	12	620.86	40630	Dihydroorotase OS=Saccharomyces cerevisiae (strain ATCC 204508 / S288c) GN=URA4 PE=1 SV=2	1.05118e+07	1.28734e+07	1.00086e+07	1.1185e+07	6.35121e+06	8.3643e+06	7.21694e+06	7.84792e+06	8.84597e+06	1.59245e+07	1.10114e+07	1.2393e+07	5.27922e+06	8.82479e+06	7.81495e+06	6.65441e+06
P47165	7	7	438.79	23770	Xanthine phosphoribosyltransferase 1 OS=Saccharomyces cerevisiae (strain ATCC 204508 / S288c) GN=XPT1 PE=1 SV=1	3.82621e+06	3.38387e+06	2.89661e+06	3.11044e+06	5.73931e+06	5.73138e+06	6.02215e+06	6.62341e+06	3.21987e+06	4.18587e+06	3.18681e+06	3.44639e+06	4.7706e+06	6.04692e+06	6.52116e+06	5.61612e+06
P38929	4	4	265.32	131748	Calcium-transporting ATPase 2 OS=Saccharomyces cerevisiae (strain ATCC 204508 / S288c) GN=PMC1 PE=1 SV=1	454869	484140	548862	373544	1.31898e+06	1.01518e+06	990960	951781	382786	598883	603849	413889	1.09636e+06	1.07107e+06	1.07307e+06	807034
P36528	4	4	138.9	32193	54S ribosomal protein L17, mitochondrial OS=Saccharomyces cerevisiae (strain ATCC 204508 / S288c) GN=MRPL17 PE=1 SV=2	387587	395782	526238	688525	1.12553e+06	1.14002e+06	1.15508e+06	1.21804e+06	326166	489585	578959	762892	935558	1.20278e+06	1.25079e+06	1.0328e+06
P32611	2	2	96.86	44158	54S ribosomal protein RML2, mitochondrial OS=Saccharomyces cerevisiae (strain ATCC 204508 / S288c) GN=RML2 PE=1 SV=1	516152	939122	553775	711421	2.39902e+06	2.27253e+06	2.03109e+06	1.44695e+06	434358	1.1617e+06	609255	788260	1.99411e+06	2.39764e+06	2.19939e+06	1.2269e+06
P25357	4	4	146.13	138541	Probable DNA-binding protein SNT1 OS=Saccharomyces cerevisiae (strain ATCC 204508 / S288c) GN=SNT1 PE=1 SV=2	208664	268844	277047	264828	837637	1.3446e+06	1.22509e+06	1.47472e+06	175597	332561	304803	293432	696256	1.41862e+06	1.3266e+06	1.25044e+06
P32485;P41808	12	11	657.84	49170	Mitogen-activated protein kinase HOG1 OS=Saccharomyces cerevisiae (strain ATCC 204508 / S288c) GN=HOG1 PE=1 SV=2	3.44497e+06	3.68517e+06	3.60129e+06	3.98802e+06	5.47559e+06	5.19941e+06	5.22055e+06	5.61013e+06	2.89905e+06	4.55857e+06	3.96208e+06	4.41875e+06	4.5514e+06	5.48566e+06	5.65314e+06	4.75694e+06
P00128	5	4	542.86	14613	Cytochrome b-c1 complex subunit 7 OS=Saccharomyces cerevisiae (strain ATCC 204508 / S288c) GN=QCR7 PE=1 SV=2	1.31998e+06	1.4732e+06	1.2682e+06	1.60894e+06	1.16378e+07	8.4254e+06	4.85298e+06	5.1516e+06	1.1108e+06	1.82236e+06	1.39525e+06	1.78271e+06	9.67353e+06	8.88926e+06	5.25511e+06	4.36815e+06
P33759	2	2	113.25	34975	37S ribosomal protein S5, mitochondrial OS=Saccharomyces cerevisiae (strain ATCC 204508 / S288c) GN=MRPS5 PE=1 SV=1	366150	537817	511737	622055	1.26139e+06	1.63951e+06	1.6694e+06	1.39682e+06	308126	665282	563005	689242	1.04849e+06	1.72977e+06	1.80773e+06	1.1844e+06
P40208	2	2	103.67	51925	Glucose-induced degradation protein 8 OS=Saccharomyces cerevisiae (strain ATCC 204508 / S288c) GN=GID8 PE=1 SV=1	101949	80202.1	71808.7	100680	303529	221218	213774	244162	85792.9	99210.4	79002.9	111555	252298	233397	231488	207030
P35719	13	11	1170.28	25082	Uncharacterized protein MRP8 OS=Saccharomyces cerevisiae (strain ATCC 204508 / S288c) GN=MRP8 PE=1 SV=1	1.03914e+07	1.16066e+07	1.18456e+07	1.21325e+07	2.77339e+07	2.40096e+07	2.30112e+07	2.93285e+07	8.74471e+06	1.43574e+07	1.30324e+07	1.34429e+07	2.30528e+07	2.53315e+07	2.4918e+07	2.48682e+07
P47160	10	10	643.52	45064	Epsin-3 OS=Saccharomyces cerevisiae (strain ATCC 204508 / S288c) GN=ENT3 PE=1 SV=1	3.4476e+06	3.60933e+06	3.19306e+06	3.60836e+06	6.09749e+06	6.86638e+06	5.79785e+06	7.05856e+06	2.90126e+06	4.46476e+06	3.51295e+06	3.99809e+06	5.06832e+06	7.2444e+06	6.27828e+06	5.9851e+06
P38625	33	32	2359.21	58730	GMP synthase [glutamine-hydrolyzing] OS=Saccharomyces cerevisiae (strain ATCC 204508 / S288c) GN=GUA1 PE=1 SV=4	3.92069e+07	4.09403e+07	3.80546e+07	4.21963e+07	2.25977e+07	2.65247e+07	2.34748e+07	3.21633e+07	3.29938e+07	5.06433e+07	4.18671e+07	4.67538e+07	1.87835e+07	2.79849e+07	2.542e+07	2.72719e+07
P36120	5	5	149.17	83769	ATP-dependent RNA helicase DBP7 OS=Saccharomyces cerevisiae (strain ATCC 204508 / S288c) GN=DBP7 PE=1 SV=1	484712	611797	616423	520676	306905	317243	290418	322486	407900	756796	678180	576913	255104	334709	314482	273442
Q01574	18	16	1173.91	79491	Acetyl-coenzyme A synthetase 1 OS=Saccharomyces cerevisiae (strain ATCC 204508 / S288c) GN=ACS1 PE=1 SV=2	703202	722920	627034	591232	4.99377e+06	4.21061e+06	3.91126e+06	3.23646e+06	591765	894256	689853	655090	4.1509e+06	4.44242e+06	4.23535e+06	2.74426e+06
P22137	59	57	4746.15	187916	Clathrin heavy chain OS=Saccharomyces cerevisiae (strain ATCC 204508 / S288c) GN=CHC1 PE=1 SV=1	1.37834e+07	1.32169e+07	1.46918e+07	1.43492e+07	1.6761e+07	1.77489e+07	1.66948e+07	1.71219e+07	1.15991e+07	1.63493e+07	1.61638e+07	1.58991e+07	1.3932e+07	1.8726e+07	1.80782e+07	1.4518e+07
P27466	5	4	219.85	50550	Calcium/calmodulin-dependent protein kinase I OS=Saccharomyces cerevisiae (strain ATCC 204508 / S288c) GN=CMK1 PE=1 SV=2	381847	574281	475261	562741	1.16743e+06	1.08015e+06	1.32422e+06	1.45156e+06	321336	710389	522876	623521	970388	1.13962e+06	1.43394e+06	1.2308e+06
Q04336	17	16	1256.32	127000	Uncharacterized protein YMR196W OS=Saccharomyces cerevisiae (strain ATCC 204508 / S288c) GN=YMR196W PE=1 SV=1	419005	291704	422242	336439	1.31449e+06	827680	790294	569043	352605	360840	464544	372777	1.09263e+06	873247	855780	482503
P06115	3	3	201.41	65056	Catalase T OS=Saccharomyces cerevisiae (strain ATCC 204508 / S288c) GN=CTT1 PE=1 SV=3	96996.4	60606.4	75242.6	53193.2	423456	275943	259797	359739	81625.4	74970.4	82780.8	58938.5	351983	291135	281325	305030
P17649	15	15	862.11	53369	4-aminobutyrate aminotransferase OS=Saccharomyces cerevisiae (strain ATCC 204508 / S288c) GN=UGA1 PE=1 SV=2	1.24664e+06	1.80339e+06	1.59582e+06	1.16109e+06	2.87548e+06	3.04107e+06	2.89538e+06	2.16514e+06	1.04908e+06	2.2308e+06	1.75569e+06	1.28649e+06	2.39014e+06	3.2085e+06	3.1353e+06	1.83587e+06
P37262	8	5	505.55	34765	6-phosphogluconolactonase-like protein 2 OS=Saccharomyces cerevisiae (strain ATCC 204508 / S288c) GN=SOL2 PE=1 SV=2	2.76916e+06	2.4743e+06	2.23878e+06	2.34316e+06	5.04957e+06	4.36665e+06	3.6858e+06	4.39832e+06	2.33033e+06	3.06072e+06	2.46308e+06	2.59623e+06	4.19728e+06	4.60705e+06	3.99121e+06	3.72943e+06
Q12513	7	7	557.03	16818	Translation machinery-associated protein 17 OS=Saccharomyces cerevisiae (strain ATCC 204508 / S288c) GN=TMA17 PE=1 SV=1	1.29391e+06	1.30769e+06	1.69835e+06	1.13e+06	9.53374e+06	6.69108e+06	8.0126e+06	4.85866e+06	1.08886e+06	1.61762e+06	1.8685e+06	1.25205e+06	7.92459e+06	7.05945e+06	8.67654e+06	4.11976e+06
P37267	2	2	129.51	17521	Assembly factor CBP4 OS=Saccharomyces cerevisiae (strain ATCC 204508 / S288c) GN=CBP4 PE=1 SV=3	161714	75806.3	130295	94440.4	704324	472363	527362	510469	136087	93772.8	143349	104641	585445	498369	571061	432837
P53111	10	10	711.88	38515	NADPH-dependent aldehyde reductase ARI1 OS=Saccharomyces cerevisiae (strain ATCC 204508 / S288c) GN=ARI1 PE=1 SV=1	2.93402e+06	2.38964e+06	3.01885e+06	2.76649e+06	624362	830652	1.07163e+06	1.19876e+06	2.46907e+06	2.95599e+06	3.32129e+06	3.06529e+06	518979	876383	1.16043e+06	1.01645e+06
P37898	22	21	1389.22	97830	Alanine/arginine aminopeptidase OS=Saccharomyces cerevisiae (strain ATCC 204508 / S288c) GN=AAP1 PE=1 SV=2	1.27271e+07	1.33448e+07	1.34939e+07	1.41641e+07	1.78031e+07	1.88604e+07	1.797e+07	2.10453e+07	1.07102e+07	1.65076e+07	1.48458e+07	1.56939e+07	1.47982e+07	1.98988e+07	1.94591e+07	1.78447e+07
P28834	16	16	1089.12	39300	Isocitrate dehydrogenase [NAD] subunit 1, mitochondrial OS=Saccharomyces cerevisiae (strain ATCC 204508 / S288c) GN=IDH1 PE=1 SV=2	1.50089e+07	1.50945e+07	1.75556e+07	1.68968e+07	4.68175e+07	3.98067e+07	2.90533e+07	4.53347e+07	1.26304e+07	1.86719e+07	1.93145e+07	1.87218e+07	3.89154e+07	4.19982e+07	3.14608e+07	3.84402e+07
P16547	18	16	1366.5	44553	Mitochondrial outer membrane protein OM45 OS=Saccharomyces cerevisiae (strain ATCC 204508 / S288c) GN=OM45 PE=1 SV=2	1.14125e+06	1.00273e+06	949209	1.36804e+06	1.0371e+07	7.36611e+06	7.57182e+06	7.24996e+06	960398	1.24039e+06	1.04431e+06	1.5158e+06	8.62055e+06	7.77165e+06	8.19923e+06	6.14739e+06
P40897	3	3	171.49	92240	Oligopeptide transporter 1 OS=Saccharomyces cerevisiae (strain ATCC 204508 / S288c) GN=OPT1 PE=1 SV=1	929964	1.08238e+06	948596	964080	218534	424209	371931	459562	782593	1.33891e+06	1.04363e+06	1.06821e+06	181649	447564	402750	389672
P21304	16	16	984.18	63992	Periodic tryptophan protein 1 OS=Saccharomyces cerevisiae (strain ATCC 204508 / S288c) GN=PWP1 PE=1 SV=1	6.663e+06	7.0245e+06	8.01208e+06	7.2674e+06	4.06277e+06	5.2534e+06	4.96255e+06	5.18098e+06	5.60712e+06	8.68934e+06	8.81477e+06	8.05233e+06	3.37704e+06	5.54263e+06	5.37376e+06	4.39306e+06
Q01662	15	15	1039.55	44144	Methionine aminopeptidase 1 OS=Saccharomyces cerevisiae (strain ATCC 204508 / S288c) GN=MAP1 PE=1 SV=2	2.04229e+07	2.23366e+07	2.30278e+07	2.07283e+07	1.20319e+07	1.40731e+07	1.40422e+07	1.56049e+07	1.71865e+07	2.76304e+07	2.53349e+07	2.29671e+07	1.00011e+07	1.48479e+07	1.52057e+07	1.32317e+07
P36523	3	2	113.32	28492	54S ribosomal protein L15, mitochondrial OS=Saccharomyces cerevisiae (strain ATCC 204508 / S288c) GN=MRPL15 PE=1 SV=3	954403	856949	938136	1.08525e+06	2.122e+06	1.9245e+06	1.83677e+06	1.52139e+06	803159	1.06005e+06	1.03212e+06	1.20247e+06	1.76384e+06	2.03045e+06	1.98897e+06	1.29002e+06
Q12034	3	3	201.1	50912	Protein SLF1 OS=Saccharomyces cerevisiae (strain ATCC 204508 / S288c) GN=SLF1 PE=1 SV=1	264833	340089	236760	327494	538912	578317	615852	687956	222865	420692	260480	362866	447952	610156	666883	583332
P41277	17	10	1312.94	28100	Glycerol-1-phosphate phosphohydrolase 1 OS=Saccharomyces cerevisiae (strain ATCC 204508 / S288c) GN=GPP1 PE=1 SV=3	1.09854e+08	1.34688e+08	1.21044e+08	1.3914e+08	6.65359e+07	8.93824e+07	8.72888e+07	9.39673e+07	9.24458e+07	1.66609e+08	1.33171e+08	1.54168e+08	5.53056e+07	9.43033e+07	9.45217e+07	7.96768e+07
P11076	13	2	932.14	20574	ADP-ribosylation factor 1 OS=Saccharomyces cerevisiae (strain ATCC 204508 / S288c) GN=ARF1 PE=1 SV=3	4.84142e+07	4.93388e+07	5.03425e+07	5.04649e+07	5.24615e+07	5.14891e+07	5.16014e+07	5.65123e+07	4.0742e+07	6.10324e+07	5.53861e+07	5.59155e+07	4.36068e+07	5.43238e+07	5.58773e+07	4.7918e+07
P53212	2	2	93.94	31794	Probable transcriptional regulatory protein HAH1 OS=Saccharomyces cerevisiae (strain ATCC 204508 / S288c) GN=YGR021W PE=1 SV=1	137154	137316	124228	286242	1.2494e+06	1.10917e+06	1.24006e+06	843208	115419	169860	136673	317158	1.03852e+06	1.17023e+06	1.34281e+06	714974
P09938	22	22	1733.25	46232	Ribonucleoside-diphosphate reductase small chain 1 OS=Saccharomyces cerevisiae (strain ATCC 204508 / S288c) GN=RNR2 PE=1 SV=2	2.86884e+07	3.24937e+07	3.14038e+07	3.00953e+07	3.89603e+07	3.99705e+07	4.02796e+07	4.15704e+07	2.41421e+07	4.01949e+07	3.455e+07	3.33458e+07	3.23844e+07	4.2171e+07	4.36172e+07	3.52484e+07
Q02785	6	6	346.36	172722	ATP-dependent permease PDR12 OS=Saccharomyces cerevisiae (strain ATCC 204508 / S288c) GN=PDR12 PE=1 SV=1	1.22917e+06	696006	961699	696270	38473.2	180397	36266	22870.1	1.03438e+06	860963	1.05805e+06	771473	31979.5	190328	39271	19392
P53274	3	3	119.25	25830	Uncharacterized protein YGR126W OS=Saccharomyces cerevisiae (strain ATCC 204508 / S288c) GN=YGR126W PE=1 SV=1	129333	162658	162784	181801	424520	364789	450554	363433	108838	201209	179093	201437	352867	384872	487888	308162
P47083	13	13	796.41	66969	U3 small nucleolar RNA-associated protein MPP10 OS=Saccharomyces cerevisiae (strain ATCC 204508 / S288c) GN=MPP10 PE=1 SV=1	4.77727e+06	4.03199e+06	4.57024e+06	5.56069e+06	7.59464e+06	7.32865e+06	6.57051e+06	7.35954e+06	4.02022e+06	4.98759e+06	5.02811e+06	6.16129e+06	6.31278e+06	7.73212e+06	7.11496e+06	6.2403e+06
Q06679	17	15	973.63	88488	U3 small nucleolar RNA-associated protein 4 OS=Saccharomyces cerevisiae (strain ATCC 204508 / S288c) GN=UTP4 PE=1 SV=1	1.95482e+06	2.31836e+06	2.22039e+06	2.15216e+06	1.5467e+06	1.80733e+06	1.77696e+06	1.83171e+06	1.64504e+06	2.86782e+06	2.44284e+06	2.38461e+06	1.28564e+06	1.90683e+06	1.9242e+06	1.55314e+06
P43558	4	4	236.05	33660	Ubiquitin thioesterase OTU1 OS=Saccharomyces cerevisiae (strain ATCC 204508 / S288c) GN=OTU1 PE=1 SV=1	820478	1.02395e+06	830418	1.00084e+06	1.43263e+06	1.40122e+06	1.6759e+06	1.49394e+06	690457	1.26663e+06	913614	1.10894e+06	1.19083e+06	1.47836e+06	1.81476e+06	1.26674e+06
P00635	8	4	499.99	53395	Repressible acid phosphatase OS=Saccharomyces cerevisiae (strain ATCC 204508 / S288c) GN=PHO5 PE=1 SV=2	241358	296829	425094	397207	2.29437e+06	1.44438e+06	4.67661e+06	1.96778e+06	203110	367179	467682	440108	1.90711e+06	1.52389e+06	5.06413e+06	1.66852e+06
Q06106	13	13	815.69	101115	Multiple RNA-binding domain-containing protein 1 OS=Saccharomyces cerevisiae (strain ATCC 204508 / S288c) GN=MRD1 PE=1 SV=1	2.54481e+06	2.72168e+06	3.31128e+06	2.73212e+06	989924	1.25127e+06	1.41237e+06	1.6647e+06	2.14153e+06	3.36673e+06	3.64303e+06	3.02721e+06	822840	1.32016e+06	1.52941e+06	1.41153e+06
Q04225	11	10	818.28	57454	Ribosome assembly protein RRB1 OS=Saccharomyces cerevisiae (strain ATCC 204508 / S288c) GN=RRB1 PE=1 SV=1	1.06474e+07	1.14271e+07	1.09013e+07	1.13814e+07	7.45508e+06	9.18848e+06	7.95799e+06	1.0238e+07	8.96014e+06	1.41354e+07	1.19935e+07	1.26107e+07	6.19677e+06	9.69434e+06	8.61741e+06	8.68099e+06
P25567	13	13	1276.14	48031	RNA-binding protein SRO9 OS=Saccharomyces cerevisiae (strain ATCC 204508 / S288c) GN=SRO9 PE=1 SV=2	2.54982e+07	2.61923e+07	2.46298e+07	2.76246e+07	1.53065e+07	1.99865e+07	2.05041e+07	1.90276e+07	2.14575e+07	3.24e+07	2.70974e+07	3.06082e+07	1.2723e+07	2.10869e+07	2.22031e+07	1.61339e+07
P28241	15	15	1431.01	39886	Isocitrate dehydrogenase [NAD] subunit 2, mitochondrial OS=Saccharomyces cerevisiae (strain ATCC 204508 / S288c) GN=IDH2 PE=1 SV=1	1.72183e+07	2.09864e+07	2.35938e+07	2.1749e+07	5.17694e+07	4.58273e+07	3.46111e+07	4.12918e+07	1.44897e+07	2.59603e+07	2.59576e+07	2.4098e+07	4.30315e+07	4.83503e+07	3.7479e+07	3.50122e+07
P14306	7	7	373.03	24456	Carboxypeptidase Y inhibitor OS=Saccharomyces cerevisiae (strain ATCC 204508 / S288c) GN=TFS1 PE=1 SV=2	628697	683279	853392	1.44391e+06	4.78318e+06	2.7788e+06	3.2589e+06	2.36647e+06	529068	845219	938889	1.59986e+06	3.97585e+06	2.93178e+06	3.52894e+06	2.00658e+06
P05030	48	16	5303.53	100069	Plasma membrane ATPase 1 OS=Saccharomyces cerevisiae (strain ATCC 204508 / S288c) GN=PMA1 PE=1 SV=2	5.01952e+08	5.20721e+08	4.56213e+08	4.55451e+08	3.31646e+08	3.79677e+08	3.25224e+08	3.18989e+08	4.22408e+08	6.44135e+08	5.01919e+08	5.04643e+08	2.75669e+08	4.0058e+08	3.52172e+08	2.70478e+08
P32451	4	4	194.68	42427	Biotin synthase, mitochondrial OS=Saccharomyces cerevisiae (strain ATCC 204508 / S288c) GN=BIO2 PE=1 SV=2	873409	890995	761158	836363	1.7341e+06	1.93165e+06	1.99741e+06	1.92428e+06	735000	1.10216e+06	837415	926697	1.44141e+06	2.038e+06	2.16292e+06	1.63163e+06
Q12305	11	11	832.15	15461	Thiosulfate sulfurtransferase RDL1, mitochondrial OS=Saccharomyces cerevisiae (strain ATCC 204508 / S288c) GN=RDL1 PE=1 SV=1	9.65501e+06	1.03612e+07	1.27351e+07	1.12426e+07	3.58378e+07	3.63131e+07	3.42049e+07	2.08961e+07	8.12498e+06	1.28169e+07	1.4011e+07	1.24569e+07	2.97889e+07	3.83123e+07	3.70392e+07	1.77182e+07
Q02883	2	2	124.04	55131	N-acyl-phosphatidylethanolamine-hydrolyzing phospholipase D, mitochondrial OS=Saccharomyces cerevisiae (strain ATCC 204508 / S288c) GN=FMP30 PE=1 SV=1	92371.5	115157	80880.4	95794.6	202660	205804	253098	192057	77733.4	142450	88983.4	106141	168454	217134	274070	162849
P38884	3	3	91.71	36707	Altered inheritance of mitochondria protein 18, mitochondrial OS=Saccharomyces cerevisiae (strain ATCC 204508 / S288c) GN=AIM18 PE=1 SV=1	221527	148119	136530	176893	632455	386132	407100	487915	186422	183223	150208	195999	525706	407390	440833	413713
P01120	12	11	1211.78	34798	Ras-like protein 2 OS=Saccharomyces cerevisiae (strain ATCC 204508 / S288c) GN=RAS2 PE=1 SV=4	4.92444e+06	4.62117e+06	4.91885e+06	4.88448e+06	9.85745e+06	8.23288e+06	9.1236e+06	8.21503e+06	4.14407e+06	5.71641e+06	5.41165e+06	5.41205e+06	8.19366e+06	8.68614e+06	9.87961e+06	6.96569e+06
Q02896	2	2	151.14	37434	Alkaline ceramidase YDC1 OS=Saccharomyces cerevisiae (strain ATCC 204508 / S288c) GN=YDC1 PE=1 SV=1	748049	643359	668847	838754	2.38517e+06	1.64316e+06	1.53233e+06	1.24271e+06	629506	795838	735856	929346	1.98259e+06	1.73362e+06	1.6593e+06	1.05372e+06
P34247	3	3	227.64	29717	U3 small nucleolar RNA-associated protein 11 OS=Saccharomyces cerevisiae (strain ATCC 204508 / S288c) GN=UTP11 PE=1 SV=2	1.1734e+06	1.4068e+06	1.37152e+06	1.56997e+06	609994	800130	742729	910391	987454	1.74022e+06	1.50893e+06	1.73954e+06	507037	844181	804273	771939
P38861	13	13	1082.06	59799	60S ribosomal export protein NMD3 OS=Saccharomyces cerevisiae (strain ATCC 204508 / S288c) GN=NMD3 PE=1 SV=3	7.62521e+06	8.21893e+06	1.0239e+07	8.87401e+06	4.34346e+06	5.22242e+06	5.37327e+06	5.97933e+06	6.41684e+06	1.01669e+07	1.12648e+07	9.83247e+06	3.61035e+06	5.50994e+06	5.81851e+06	5.07e+06
Q99312	3	3	205.24	51526	IMP-specific 5'-nucleotidase 1 OS=Saccharomyces cerevisiae (strain ATCC 204508 / S288c) GN=ISN1 PE=1 SV=1	403779	318360	431262	287622	839570	666112	726233	681498	339792	393812	474468	318687	697863	702784	786410	577856
D6VTK4	3	3	243.94	47933	Pheromone alpha factor receptor OS=Saccharomyces cerevisiae (strain ATCC 204508 / S288c) GN=STE2 PE=1 SV=2	2.66463e+06	2.34551e+06	3.20244e+06	3.27824e+06	521292	888883	478048	1.13177e+06	2.24237e+06	2.90141e+06	3.52328e+06	3.63232e+06	433306	937820	517660	959650
P40007	5	5	234.18	26885	Nucleolar protein 16 OS=Saccharomyces cerevisiae (strain ATCC 204508 / S288c) GN=NOP16 PE=1 SV=1	5.03994e+06	4.92639e+06	5.02462e+06	4.78249e+06	3.46948e+06	3.62885e+06	3.43066e+06	3.46128e+06	4.24126e+06	6.09397e+06	5.52802e+06	5.29903e+06	2.88389e+06	3.82864e+06	3.71493e+06	2.93489e+06
P40856	3	3	212.24	121897	SIT4-associating protein SAP185 OS=Saccharomyces cerevisiae (strain ATCC 204508 / S288c) GN=SAP185 PE=1 SV=1	341934	330178	288586	323278	214517	187358	157977	207253	287747	408432	317498	358194	178310	197673	171067	175734
Q08421	6	6	253.33	47380	Enhancer of translation termination 1 OS=Saccharomyces cerevisiae (strain ATCC 204508 / S288c) GN=ETT1 PE=1 SV=1	2.22049e+06	2.0868e+06	2.4481e+06	2.46395e+06	969707	1.26401e+06	1.07246e+06	1.40659e+06	1.86861e+06	2.58138e+06	2.69336e+06	2.73007e+06	806035	1.3336e+06	1.16133e+06	1.19268e+06
P14020	16	16	1372.85	30514	Dolichol-phosphate mannosyltransferase OS=Saccharomyces cerevisiae (strain ATCC 204508 / S288c) GN=DPM1 PE=1 SV=3	1.90905e+07	2.06255e+07	2.03729e+07	1.93718e+07	2.74322e+07	2.60787e+07	2.79024e+07	2.57175e+07	1.60652e+07	2.55139e+07	2.2414e+07	2.14641e+07	2.28021e+07	2.75144e+07	3.02144e+07	2.18064e+07
P03965	30	27	2228.22	124465	Carbamoyl-phosphate synthase arginine-specific large chain OS=Saccharomyces cerevisiae (strain ATCC 204508 / S288c) GN=CPA2 PE=1 SV=1	6.74985e+06	7.65736e+06	6.79618e+06	6.73921e+06	9.95128e+06	9.22906e+06	9.20676e+06	1.07068e+07	5.68021e+06	9.47219e+06	7.47706e+06	7.4671e+06	8.27166e+06	9.73716e+06	9.96966e+06	9.0785e+06
Q02486	4	4	186.06	21548	ARS-binding factor 2, mitochondrial OS=Saccharomyces cerevisiae (strain ATCC 204508 / S288c) GN=ABF2 PE=1 SV=1	1.14467e+06	1.02743e+06	1.18182e+06	1.11132e+06	1.70497e+06	1.64069e+06	1.6142e+06	1.91708e+06	963272	1.27093e+06	1.30022e+06	1.23135e+06	1.41719e+06	1.73101e+06	1.74796e+06	1.62553e+06
P53152	3	3	282.68	15706	Ubiquitin-conjugating enzyme variant MMS2 OS=Saccharomyces cerevisiae (strain ATCC 204508 / S288c) GN=MMS2 PE=1 SV=1	4.48843e+06	5.13224e+06	4.92442e+06	4.63788e+06	7.02947e+06	6.27718e+06	6.30756e+06	6.11826e+06	3.77715e+06	6.34861e+06	5.41777e+06	5.13881e+06	5.843e+06	6.62276e+06	6.83022e+06	5.1878e+06
P25373	7	7	525.35	12486	Glutaredoxin-1 OS=Saccharomyces cerevisiae (strain ATCC 204508 / S288c) GN=GRX1 PE=1 SV=1	6.68718e+06	9.68918e+06	8.71731e+06	9.25538e+06	1.94137e+07	1.42875e+07	1.55874e+07	1.57175e+07	5.62747e+06	1.19856e+07	9.59066e+06	1.0255e+07	1.61369e+07	1.50741e+07	1.68791e+07	1.33272e+07
P07245	33	29	2261.6	102540	C-1-tetrahydrofolate synthase, cytoplasmic OS=Saccharomyces cerevisiae (strain ATCC 204508 / S288c) GN=ADE3 PE=1 SV=1	2.60286e+07	3.13767e+07	2.4995e+07	2.66372e+07	1.74959e+07	1.92527e+07	1.89762e+07	1.90152e+07	2.19039e+07	3.88132e+07	2.74991e+07	2.95142e+07	1.45429e+07	2.03126e+07	2.05487e+07	1.61234e+07
Q02908	11	11	554.81	64244	Elongator complex protein 3 OS=Saccharomyces cerevisiae (strain ATCC 204508 / S288c) GN=ELP3 PE=1 SV=1	4.7033e+06	4.76937e+06	4.81112e+06	4.7711e+06	3.49119e+06	3.51305e+06	3.92151e+06	4.26975e+06	3.95797e+06	5.89973e+06	5.29312e+06	5.28642e+06	2.90193e+06	3.70646e+06	4.24646e+06	3.62041e+06
P38086	5	5	308.32	108847	DNA repair and recombination protein RDH54 OS=Saccharomyces cerevisiae (strain ATCC 204508 / S288c) GN=RDH54 PE=1 SV=4	733972	981901	727994	869870	346074	430715	429702	507069	617659	1.21462e+06	800928	963823	287662	454428	465308	429954
P09064	16	16	1119.97	31840	Eukaryotic translation initiation factor 2 subunit beta OS=Saccharomyces cerevisiae (strain ATCC 204508 / S288c) GN=SUI3 PE=1 SV=2	3.01662e+07	3.06846e+07	3.12805e+07	3.28214e+07	2.13309e+07	2.10017e+07	2.13575e+07	2.54126e+07	2.53858e+07	3.7957e+07	3.44144e+07	3.63664e+07	1.77306e+07	2.2158e+07	2.31272e+07	2.15479e+07
P38523	8	8	492.76	26050	GrpE protein homolog, mitochondrial OS=Saccharomyces cerevisiae (strain ATCC 204508 / S288c) GN=MGE1 PE=1 SV=1	6.46762e+06	6.75458e+06	6.99078e+06	6.36695e+06	9.49947e+06	9.31519e+06	8.71836e+06	9.20341e+06	5.4427e+06	8.35545e+06	7.69116e+06	7.05463e+06	7.8961e+06	9.82803e+06	9.44079e+06	7.80376e+06
P38792	5	5	351.81	39574	Exosome complex component RRP4 OS=Saccharomyces cerevisiae (strain ATCC 204508 / S288c) GN=RRP4 PE=1 SV=1	2.79709e+06	2.77895e+06	2.76272e+06	2.83134e+06	1.97349e+06	2.11983e+06	2.01009e+06	2.0872e+06	2.35384e+06	3.43758e+06	3.0395e+06	3.13715e+06	1.64039e+06	2.23654e+06	2.17665e+06	1.76978e+06
P40528	2	2	123.75	105063	Protein SYG1 OS=Saccharomyces cerevisiae (strain ATCC 204508 / S288c) GN=SYG1 PE=1 SV=1	230207	299225	264088	299312	108715	105409	131628	160849	193726	370143	290546	331641	90365.2	111213	142535	136387
P25374	8	8	502.94	54775	Cysteine desulfurase, mitochondrial OS=Saccharomyces cerevisiae (strain ATCC 204508 / S288c) GN=NFS1 PE=1 SV=2	3.88587e+06	3.95093e+06	3.79511e+06	3.65285e+06	5.49562e+06	4.97224e+06	5.03598e+06	5.64721e+06	3.27008e+06	4.88732e+06	4.17533e+06	4.04738e+06	4.56804e+06	5.24598e+06	5.45328e+06	4.78838e+06
Q04217	13	13	671.58	145434	Probable ATP-dependent RNA helicase DHR1 OS=Saccharomyces cerevisiae (strain ATCC 204508 / S288c) GN=ECM16 PE=1 SV=1	3.02722e+06	2.94965e+06	3.24935e+06	3.4703e+06	1.57121e+06	1.95365e+06	1.84017e+06	2.10132e+06	2.5475e+06	3.64873e+06	3.57489e+06	3.84512e+06	1.30601e+06	2.0612e+06	1.99265e+06	1.78175e+06
P38821	13	13	849.05	54368	Aspartyl aminopeptidase 4 OS=Saccharomyces cerevisiae (strain ATCC 204508 / S288c) GN=APE4 PE=1 SV=1	2.57266e+06	2.38497e+06	2.55024e+06	2.37189e+06	4.64189e+06	3.94509e+06	4.27832e+06	3.70106e+06	2.16497e+06	2.95022e+06	2.80574e+06	2.62808e+06	3.85841e+06	4.16229e+06	4.63283e+06	3.13821e+06
Q12230	13	11	1155.12	38048	Sphingolipid long chain base-responsive protein LSP1 OS=Saccharomyces cerevisiae (strain ATCC 204508 / S288c) GN=LSP1 PE=1 SV=1	1.18346e+07	1.29918e+07	1.51334e+07	1.259e+07	2.5043e+07	2.1484e+07	2.12811e+07	2.17115e+07	9.95915e+06	1.60709e+07	1.66495e+07	1.39498e+07	2.08161e+07	2.26668e+07	2.30445e+07	1.84096e+07
P53043	7	6	330.52	58471	Serine/threonine-protein phosphatase T OS=Saccharomyces cerevisiae (strain ATCC 204508 / S288c) GN=PPT1 PE=1 SV=1	3.6638e+06	3.7926e+06	3.51987e+06	3.60514e+06	2.31878e+06	2.44887e+06	2.37974e+06	3.03369e+06	3.0832e+06	4.69147e+06	3.87251e+06	3.99452e+06	1.9274e+06	2.58369e+06	2.57693e+06	2.57233e+06
P39692	8	8	359.7	114872	Sulfite reductase [NADPH] flavoprotein component OS=Saccharomyces cerevisiae (strain ATCC 204508 / S288c) GN=MET10 PE=1 SV=2	221987	308346	260008	278683	511486	599607	756106	527762	186808	381425	286056	308783	425154	632619	818759	447500
P34219	5	5	349.72	59361	Transcriptional regulatory protein TOD6 OS=Saccharomyces cerevisiae (strain ATCC 204508 / S288c) GN=TOD6 PE=1 SV=1	578423	610168	812876	567679	79506.7	136863	124264	230062	486761	754781	894314	628993	66087.2	144397	134561	195075
P10591	48	13	5526.32	69786	Heat shock protein SSA1 OS=Saccharomyces cerevisiae (strain ATCC 204508 / S288c) GN=SSA1 PE=1 SV=4	2.16396e+08	2.44728e+08	2.20214e+08	2.51752e+08	3.15625e+08	3.14861e+08	3.0898e+08	3.57343e+08	1.82104e+08	3.0273e+08	2.42277e+08	2.78944e+08	2.62352e+08	3.32195e+08	3.34583e+08	3.02999e+08
P37263	4	4	281.38	18069	UPF0743 protein YCR087C-A OS=Saccharomyces cerevisiae (strain ATCC 204508 / S288c) GN=YCR087C-A PE=1 SV=1	2.62012e+06	3.11361e+06	3.60247e+06	3.41454e+06	1.56269e+06	2.16649e+06	1.95514e+06	2.22947e+06	2.20491e+06	3.85155e+06	3.96338e+06	3.78333e+06	1.29893e+06	2.28576e+06	2.11715e+06	1.89041e+06
P43545;P53824	2	2	76.45	32284	Probable pyridoxal 5'-phosphate synthase subunit SNZ3 OS=Saccharomyces cerevisiae (strain ATCC 204508 / S288c) GN=SNZ3 PE=2 SV=1	14385.6	11736.4	5608.07	20817.2	136108	123788	90886.6	93371.8	12106	14517.9	6169.91	23065.6	113135	130603	98417.6	79171.9
P36139	5	5	368.56	31227	Protein PET10 OS=Saccharomyces cerevisiae (strain ATCC 204508 / S288c) GN=PET10 PE=1 SV=3	745547	946212	805553	818686	3.34037e+06	2.12494e+06	2.29719e+06	2.00406e+06	627400	1.17047e+06	886258	907111	2.77657e+06	2.24193e+06	2.48754e+06	1.69929e+06
P23776	11	11	740.42	51735	Glucan 1,3-beta-glucosidase I/II OS=Saccharomyces cerevisiae (strain ATCC 204508 / S288c) GN=EXG1 PE=1 SV=1	2.57724e+06	2.55033e+06	2.65778e+06	2.30198e+06	4.12855e+06	3.98126e+06	3.54617e+06	3.38182e+06	2.16882e+06	3.15477e+06	2.92405e+06	2.55061e+06	3.43171e+06	4.20044e+06	3.84001e+06	2.86752e+06
P32895	14	13	964.71	47474	Ribose-phosphate pyrophosphokinase 1 OS=Saccharomyces cerevisiae (strain ATCC 204508 / S288c) GN=PRS1 PE=1 SV=1	1.13867e+07	1.19696e+07	1.22668e+07	1.21204e+07	8.2982e+06	9.05818e+06	9.07229e+06	1.02904e+07	9.58229e+06	1.48065e+07	1.34958e+07	1.34295e+07	6.89759e+06	9.55687e+06	9.82404e+06	8.72548e+06
Q02207	6	6	400.77	98984	Peroxisomal hydratase-dehydrogenase-epimerase OS=Saccharomyces cerevisiae (strain ATCC 204508 / S288c) GN=FOX2 PE=1 SV=1	143616	108571	146164	148628	1.34215e+06	1.06659e+06	825794	984396	120857	134303	160808	164681	1.11562e+06	1.12531e+06	894221	834690
P40364	9	8	558.03	28566	Mitochondrial peculiar membrane protein 1 OS=Saccharomyces cerevisiae (strain ATCC 204508 / S288c) GN=MPM1 PE=1 SV=1	640165	1.31397e+06	805783	833162	2.5707e+06	2.28329e+06	2.61756e+06	2.08748e+06	538718	1.62538e+06	886511	923151	2.13681e+06	2.409e+06	2.83446e+06	1.77002e+06
Q3E824	3	3	283.32	9612	Uncharacterized protein YOR020W-A OS=Saccharomyces cerevisiae (strain ATCC 204508 / S288c) GN=YOR020W-A PE=4 SV=1	451456	469561	372423	469011	1.22761e+06	1.11058e+06	731623	859246	379914	580849	409734	519668	1.02041e+06	1.17172e+06	792247	728572
Q04432	5	5	387.34	25711	Probable chaperone protein HSP31 OS=Saccharomyces cerevisiae (strain ATCC 204508 / S288c) GN=HSP31 PE=1 SV=1	1.111e+06	791947	976391	667035	1.92874e+06	1.75229e+06	2.07434e+06	1.59325e+06	934942	979642	1.07421e+06	739080	1.6032e+06	1.84877e+06	2.24623e+06	1.35095e+06
Q08686	8	8	304.22	34425	Thiosulfate sulfurtransferase TUM1 OS=Saccharomyces cerevisiae (strain ATCC 204508 / S288c) GN=TUM1 PE=1 SV=1	3.45938e+06	3.3672e+06	3.5311e+06	3.36614e+06	5.91765e+06	5.80746e+06	5.44761e+06	5.01294e+06	2.91118e+06	4.16524e+06	3.88487e+06	3.72971e+06	4.91884e+06	6.12718e+06	5.89901e+06	4.25058e+06
P16451	5	5	672.47	45448	Pyruvate dehydrogenase complex protein X component, mitochondrial OS=Saccharomyces cerevisiae (strain ATCC 204508 / S288c) GN=PDX1 PE=1 SV=1	3.94869e+06	4.57407e+06	4.54851e+06	4.74529e+06	6.46697e+06	6.4686e+06	6.57288e+06	6.02414e+06	3.32295e+06	5.65814e+06	5.0042e+06	5.25782e+06	5.37544e+06	6.82473e+06	7.11752e+06	5.10799e+06
P25372	3	3	140.73	14651	Thioredoxin-3, mitochondrial OS=Saccharomyces cerevisiae (strain ATCC 204508 / S288c) GN=TRX3 PE=1 SV=1	566558	607700	640133	638464	1.32392e+06	1.08448e+06	1.08345e+06	1.28085e+06	476775	751728	704265	707423	1.10047e+06	1.14419e+06	1.17323e+06	1.08606e+06
P38720	41	30	3025.3	53908	6-phosphogluconate dehydrogenase, decarboxylating 1 OS=Saccharomyces cerevisiae (strain ATCC 204508 / S288c) GN=GND1 PE=1 SV=1	5.97069e+07	8.01791e+07	6.40935e+07	6.70958e+07	9.58579e+07	9.6783e+07	9.49016e+07	1.01431e+08	5.02451e+07	9.91819e+07	7.05147e+07	7.43427e+07	7.96785e+07	1.02111e+08	1.02765e+08	8.60055e+07
P32495	2	2	78.3	17168	H/ACA ribonucleoprotein complex subunit 2 OS=Saccharomyces cerevisiae (strain ATCC 204508 / S288c) GN=NHP2 PE=1 SV=2	4.44407e+06	5.60808e+06	5.2432e+06	4.58609e+06	3.91781e+06	4.87224e+06	4.66737e+06	5.15256e+06	3.73982e+06	6.93722e+06	5.76849e+06	5.08142e+06	3.25654e+06	5.14048e+06	5.05412e+06	4.36896e+06
P22217	8	4	587.32	11342	Thioredoxin-1 OS=Saccharomyces cerevisiae (strain ATCC 204508 / S288c) GN=TRX1 PE=1 SV=3	2.52303e+07	3.06045e+07	3.27782e+07	3.23958e+07	5.4286e+07	5.37311e+07	5.13828e+07	5.28792e+07	2.1232e+07	3.78579e+07	3.60621e+07	3.58948e+07	4.51233e+07	5.66893e+07	5.56405e+07	4.48373e+07
P10080	12	12	1154.91	33026	Single-stranded nucleic acid-binding protein OS=Saccharomyces cerevisiae (strain ATCC 204508 / S288c) GN=SBP1 PE=1 SV=2	4.48299e+07	4.59035e+07	4.8839e+07	4.9973e+07	6.54405e+07	5.78767e+07	5.73802e+07	5.93392e+07	3.77257e+07	5.67829e+07	5.37319e+07	5.53705e+07	5.43951e+07	6.1063e+07	6.21348e+07	5.03149e+07
Q12339	5	5	258.24	29068	rRNA-processing protein UTP23 OS=Saccharomyces cerevisiae (strain ATCC 204508 / S288c) GN=UTP23 PE=1 SV=1	1.46402e+06	1.2525e+06	1.52642e+06	1.38626e+06	679670	780587	793999	949353	1.23202e+06	1.54935e+06	1.67934e+06	1.53598e+06	564952	823561	859791	804976
Q05584	8	8	547.58	31763	Hydroxyacylglutathione hydrolase, cytoplasmic isozyme OS=Saccharomyces cerevisiae (strain ATCC 204508 / S288c) GN=GLO2 PE=1 SV=1	2.53525e+06	2.7352e+06	2.84578e+06	2.80221e+06	3.25526e+06	3.41914e+06	3.04795e+06	3.0916e+06	2.13349e+06	3.38346e+06	3.13088e+06	3.10487e+06	2.70582e+06	3.60738e+06	3.30051e+06	2.62143e+06
Q00711;P47052	18	18	1790.13	70812	Succinate dehydrogenase [ubiquinone] flavoprotein subunit, mitochondrial OS=Saccharomyces cerevisiae (strain ATCC 204508 / S288c) GN=SDH1 PE=1 SV=1	3.59698e+06	2.74621e+06	2.62263e+06	3.60201e+06	3.33685e+07	2.95266e+07	2.38157e+07	1.10532e+07	3.02697e+06	3.39707e+06	2.88538e+06	3.99106e+06	2.77364e+07	3.11522e+07	2.57891e+07	9.37227e+06
P53839	10	10	701.55	39035	Glyoxylate reductase 1 OS=Saccharomyces cerevisiae (strain ATCC 204508 / S288c) GN=GOR1 PE=1 SV=1	1.36422e+06	1.20353e+06	1.73576e+06	1.33081e+06	7.32111e+06	1.26196e+07	5.10552e+06	4.22579e+06	1.14803e+06	1.48877e+06	1.90965e+06	1.47455e+06	6.08542e+06	1.33144e+07	5.52858e+06	3.58313e+06
P37838	16	15	1022	78119	Nucleolar protein 4 OS=Saccharomyces cerevisiae (strain ATCC 204508 / S288c) GN=NOP4 PE=1 SV=1	3.60543e+06	3.565e+06	4.31402e+06	3.28853e+06	1.51109e+06	2.0202e+06	1.84676e+06	2.51448e+06	3.03408e+06	4.40992e+06	4.74622e+06	3.64372e+06	1.25604e+06	2.13142e+06	1.99978e+06	2.13208e+06
P38087	2	2	58.67	36760	Carrier protein YMC2, mitochondrial OS=Saccharomyces cerevisiae (strain ATCC 204508 / S288c) GN=YMC2 PE=1 SV=1	617663	845672	573970	529996	320913	285259	399499	252522	519782	1.0461e+06	631473	587240	266748	300964	432602	214119
P38158	10	8	514.89	68385	Alpha-glucosidase MAL32 OS=Saccharomyces cerevisiae (strain ATCC 204508 / S288c) GN=MAL32 PE=1 SV=1	765887	197821	337502	503441	3.31033e+06	2.60079e+06	2.39384e+06	2.17342e+06	644517	244706	371315	557816	2.75159e+06	2.74397e+06	2.5922e+06	1.84289e+06
P33416	18	16	1118.12	91679	Heat shock protein 78, mitochondrial OS=Saccharomyces cerevisiae (strain ATCC 204508 / S288c) GN=HSP78 PE=1 SV=2	2.08151e+06	1.68009e+06	1.3048e+06	1.66083e+06	3.24257e+06	2.49961e+06	2.72022e+06	2.80854e+06	1.75165e+06	2.07828e+06	1.43552e+06	1.84022e+06	2.69528e+06	2.63722e+06	2.94563e+06	2.38142e+06
Q05933	6	6	325.82	20679	Actin-related protein 2/3 complex subunit 3 OS=Saccharomyces cerevisiae (strain ATCC 204508 / S288c) GN=ARC18 PE=1 SV=1	4.75519e+06	5.39016e+06	5.27477e+06	5.22997e+06	8.00904e+06	7.83043e+06	7.48382e+06	6.79779e+06	4.00164e+06	6.66765e+06	5.80322e+06	5.79485e+06	6.65724e+06	8.26153e+06	8.10395e+06	5.76398e+06
P25359	5	5	270.74	44269	Exosome complex component RRP43 OS=Saccharomyces cerevisiae (strain ATCC 204508 / S288c) GN=RRP43 PE=1 SV=2	1.32226e+06	1.48694e+06	1.39788e+06	1.3215e+06	1.01375e+06	1.11779e+06	988893	1.26436e+06	1.11272e+06	1.83935e+06	1.53792e+06	1.46423e+06	842644	1.17933e+06	1.07084e+06	1.07208e+06
P32356;P35172	15	15	936.09	86167	Neutral trehalase OS=Saccharomyces cerevisiae (strain ATCC 204508 / S288c) GN=NTH1 PE=1 SV=3	1.52601e+06	1.28832e+06	1.60445e+06	1.24346e+06	2.20146e+06	2.20342e+06	2.10005e+06	1.63495e+06	1.28418e+06	1.59365e+06	1.7652e+06	1.37776e+06	1.82989e+06	2.32472e+06	2.27406e+06	1.38631e+06
Q04304	5	5	456.73	24981	UPF0659 protein YMR090W OS=Saccharomyces cerevisiae (strain ATCC 204508 / S288c) GN=YMR090W PE=1 SV=1	219699	206580	252655	268671	876173	378115	500459	435951	184883	255540	277968	297689	728288	398932	541928	369652
P07259	104	98	7898.05	246198	Protein URA2 OS=Saccharomyces cerevisiae (strain ATCC 204508 / S288c) GN=URA2 PE=1 SV=5	3.55347e+07	3.90815e+07	3.97793e+07	3.48983e+07	2.17237e+07	2.36678e+07	2.14424e+07	2.7816e+07	2.99036e+07	4.8344e+07	4.37646e+07	3.86676e+07	1.80571e+07	2.49708e+07	2.32191e+07	2.35857e+07
P57744	2	2	124.04	9986	Mitochondrial import inner membrane translocase subunit TIM8 OS=Saccharomyces cerevisiae (strain ATCC 204508 / S288c) GN=TIM8 PE=1 SV=1	1.8212e+06	1.72016e+06	1.96445e+06	1.87841e+06	3.501e+06	2.84564e+06	3.50709e+06	3.14011e+06	1.53259e+06	2.12785e+06	2.16126e+06	2.08129e+06	2.91009e+06	3.00231e+06	3.7977e+06	2.66256e+06
P47818	3	3	131.58	34229	Protein CCC1 OS=Saccharomyces cerevisiae (strain ATCC 204508 / S288c) GN=CCC1 PE=1 SV=1	740066	729874	654910	744546	839354	937331	920498	1.09069e+06	622788	902857	720523	824963	697684	988935	996773	924820
P29311	24	6	2221.51	30187	Protein BMH1 OS=Saccharomyces cerevisiae (strain ATCC 204508 / S288c) GN=BMH1 PE=1 SV=4	1.00228e+08	1.11313e+08	1.08353e+08	1.13477e+08	1.55265e+08	1.544e+08	1.40526e+08	1.51094e+08	8.43446e+07	1.37695e+08	1.19208e+08	1.25733e+08	1.29058e+08	1.62901e+08	1.5217e+08	1.28115e+08
P25617	4	4	234.66	33630	Uncharacterized protein YCR016W OS=Saccharomyces cerevisiae (strain ATCC 204508 / S288c) GN=YCR016W PE=1 SV=2	1.03497e+06	1.08722e+06	1.37113e+06	1.21367e+06	573397	726274	641980	776178	870960	1.34489e+06	1.5085e+06	1.34475e+06	476616	766258	695176	658137
P25642	2	2	79.55	16598	54S ribosomal protein IMG2, mitochondrial OS=Saccharomyces cerevisiae (strain ATCC 204508 / S288c) GN=IMG2 PE=1 SV=2	125556	203310	158257	260335	594681	711011	643304	649772	105659	251496	174111	288453	494308	750156	696609	550955
P15646	22	22	1835.88	34615	rRNA 2'-O-methyltransferase fibrillarin OS=Saccharomyces cerevisiae (strain ATCC 204508 / S288c) GN=NOP1 PE=1 SV=1	5.43631e+07	5.80134e+07	6.00552e+07	5.53976e+07	3.80024e+07	4.46934e+07	4.18677e+07	4.7422e+07	4.57482e+07	7.17629e+07	6.60719e+07	6.1381e+07	3.15882e+07	4.7154e+07	4.53369e+07	4.02101e+07
P39113	5	4	161.52	161298	Regulatory protein CAT8 OS=Saccharomyces cerevisiae (strain ATCC 204508 / S288c) GN=CAT8 PE=1 SV=2	55370.7	24542.4	25230.3	124875	462834	217460	289572	410245	46596.1	30359.1	27758	138362	384715	229432	313567	347855
P11972	2	2	164.37	80236	Protein SST2 OS=Saccharomyces cerevisiae (strain ATCC 204508 / S288c) GN=SST2 PE=1 SV=2	774408	811580	1.2802e+06	1.0046e+06	291983	471651	301144	237170	651688	1.00393e+06	1.40846e+06	1.1131e+06	242701	497618	326097	201101
Q05543	5	5	299.42	46517	Regulator of Ty1 transposition protein 103 OS=Saccharomyces cerevisiae (strain ATCC 204508 / S288c) GN=RTT103 PE=1 SV=1	875575	902649	1.08748e+06	935267	1.22632e+06	1.1971e+06	1.15516e+06	1.32511e+06	736823	1.11658e+06	1.19643e+06	1.03628e+06	1.01934e+06	1.263e+06	1.25088e+06	1.12358e+06
Q04338	4	4	278.71	24653	t-SNARE VTI1 OS=Saccharomyces cerevisiae (strain ATCC 204508 / S288c) GN=VTI1 PE=1 SV=3	1.65243e+06	1.61754e+06	1.61724e+06	1.86646e+06	2.63972e+06	2.40878e+06	2.69771e+06	2.59285e+06	1.39057e+06	2.0009e+06	1.77927e+06	2.06805e+06	2.19417e+06	2.54139e+06	2.92124e+06	2.19853e+06
Q06151	13	11	855.42	40972	m7GpppX diphosphatase OS=Saccharomyces cerevisiae (strain ATCC 204508 / S288c) GN=DCS1 PE=1 SV=1	3.37327e+06	3.84707e+06	3.80865e+06	3.44359e+06	7.81674e+06	6.2767e+06	5.59438e+06	5.47725e+06	2.83871e+06	4.75885e+06	4.19022e+06	3.81552e+06	6.49739e+06	6.62226e+06	6.05794e+06	4.64427e+06
P37291	29	27	2376.42	52471	Serine hydroxymethyltransferase, cytosolic OS=Saccharomyces cerevisiae (strain ATCC 204508 / S288c) GN=SHM2 PE=1 SV=2	8.37616e+07	9.39052e+07	7.20884e+07	8.35406e+07	4.37087e+07	5.25745e+07	4.97351e+07	4.69394e+07	7.04879e+07	1.16161e+08	7.93106e+07	9.25637e+07	3.63314e+07	5.54689e+07	5.38563e+07	3.98009e+07
P38081	5	5	264.82	58014	Uncharacterized glycosyl hydrolase YBR056W OS=Saccharomyces cerevisiae (strain ATCC 204508 / S288c) GN=YBR056W PE=1 SV=1	1.64408e+06	1.29811e+06	1.47721e+06	1.25749e+06	3.369e+06	2.47493e+06	2.59634e+06	2.36965e+06	1.38354e+06	1.60576e+06	1.62521e+06	1.39331e+06	2.80036e+06	2.61119e+06	2.81148e+06	2.00928e+06
P34227	10	10	552.86	29648	Mitochondrial peroxiredoxin PRX1 OS=Saccharomyces cerevisiae (strain ATCC 204508 / S288c) GN=PRX1 PE=1 SV=1	2.30702e+06	5.66085e+06	2.094e+06	3.17326e+06	1.0651e+07	9.46495e+06	8.81632e+06	8.04162e+06	1.94142e+06	7.0025e+06	2.30378e+06	3.51599e+06	8.85325e+06	9.98604e+06	9.54686e+06	6.81865e+06
P53877	7	7	403.07	62305	Pre-rRNA-processing protein IPI3 OS=Saccharomyces cerevisiae (strain ATCC 204508 / S288c) GN=IPI3 PE=1 SV=1	1.9272e+06	2.04454e+06	1.91373e+06	1.88248e+06	967930	1.19256e+06	1.17481e+06	1.50966e+06	1.62179e+06	2.52911e+06	2.10545e+06	2.0858e+06	804558	1.25822e+06	1.27216e+06	1.28008e+06
P40515	4	4	163.09	17836	Mitochondria fission 1 protein OS=Saccharomyces cerevisiae (strain ATCC 204508 / S288c) GN=FIS1 PE=1 SV=1	997442	1.18393e+06	1.01629e+06	872454	2.00443e+06	1.9272e+06	1.92395e+06	1.65434e+06	839378	1.46453e+06	1.11811e+06	966686	1.66611e+06	2.0333e+06	2.08338e+06	1.40275e+06
P32316	25	24	1763.14	58903	Acetyl-CoA hydrolase OS=Saccharomyces cerevisiae (strain ATCC 204508 / S288c) GN=ACH1 PE=1 SV=2	3.27711e+06	3.01219e+06	2.93004e+06	4.51076e+06	2.04174e+07	1.73299e+07	1.48939e+07	1.23749e+07	2.75779e+06	3.72609e+06	3.22359e+06	4.99796e+06	1.69712e+07	1.82839e+07	1.6128e+07	1.04929e+07
P53969	5	4	257.46	54714	Sorting assembly machinery 50 kDa subunit OS=Saccharomyces cerevisiae (strain ATCC 204508 / S288c) GN=SAM50 PE=1 SV=1	1.24816e+06	1.31182e+06	1.17682e+06	1.11835e+06	1.67839e+06	1.60522e+06	1.60825e+06	1.53801e+06	1.05037e+06	1.62273e+06	1.29472e+06	1.23915e+06	1.39511e+06	1.6936e+06	1.74152e+06	1.30411e+06
Q03558;P41816	23	23	1872.68	44983	NADPH dehydrogenase 2 OS=Saccharomyces cerevisiae (strain ATCC 204508 / S288c) GN=OYE2 PE=1 SV=3	5.66617e+07	5.71875e+07	5.2881e+07	5.99698e+07	3.60565e+07	3.93603e+07	4.45874e+07	4.91629e+07	4.76825e+07	7.07412e+07	5.81789e+07	6.6447e+07	2.99707e+07	4.15272e+07	4.8282e+07	4.16862e+07
P38883	7	7	478.66	87198	Pre-rRNA-processing protein RIX1 OS=Saccharomyces cerevisiae (strain ATCC 204508 / S288c) GN=RIX1 PE=1 SV=2	1.42492e+06	1.50269e+06	1.30452e+06	1.35343e+06	563075	675847	570664	744799	1.19912e+06	1.85883e+06	1.43521e+06	1.49961e+06	468037	713055	617951	631530
P47047	17	16	1015.94	122662	ATP-dependent RNA helicase DOB1 OS=Saccharomyces cerevisiae (strain ATCC 204508 / S288c) GN=MTR4 PE=1 SV=1	3.11777e+06	3.47699e+06	3.72466e+06	3.69494e+06	1.76273e+06	2.33829e+06	2.30336e+06	2.18816e+06	2.6237e+06	4.30105e+06	4.09782e+06	4.09403e+06	1.46521e+06	2.46702e+06	2.49422e+06	1.85538e+06
Q03446	2	2	159.88	24253	Protein RCR2 OS=Saccharomyces cerevisiae (strain ATCC 204508 / S288c) GN=RCR2 PE=1 SV=1	566878	714153	646506	486455	1.50766e+06	1.10841e+06	1.36224e+06	1.19254e+06	477045	883411	711276	538997	1.25319e+06	1.16944e+06	1.47511e+06	1.01117e+06
P53914	23	22	1513.51	119615	UPF0202 protein KRE33 OS=Saccharomyces cerevisiae (strain ATCC 204508 / S288c) GN=KRE33 PE=1 SV=1	7.45917e+06	5.91606e+06	5.99798e+06	7.74245e+06	3.73108e+06	4.40823e+06	3.74689e+06	4.27895e+06	6.27712e+06	7.3182e+06	6.59888e+06	8.5787e+06	3.10133e+06	4.65092e+06	4.05736e+06	3.62821e+06
Q02725	24	22	1417.62	96608	Vacuolar transporter chaperone 3 OS=Saccharomyces cerevisiae (strain ATCC 204508 / S288c) GN=VTC3 PE=1 SV=1	5.00358e+06	6.59838e+06	4.90434e+06	8.23614e+06	1.39051e+07	1.19266e+07	1.54149e+07	1.60053e+07	4.21066e+06	8.16222e+06	5.39568e+06	9.12571e+06	1.15581e+07	1.25832e+07	1.66922e+07	1.35712e+07
P32799	4	4	124.47	15069	Cytochrome c oxidase subunit 6A, mitochondrial OS=Saccharomyces cerevisiae (strain ATCC 204508 / S288c) GN=COX13 PE=1 SV=1	690233	551547	625790	874692	2.76723e+06	2.55606e+06	1.43134e+06	2.28834e+06	580852	682266	688485	969166	2.30016e+06	2.69679e+06	1.54995e+06	1.94033e+06
Q08444	7	6	436.97	52052	20S-pre-rRNA D-site endonuclease NOB1 OS=Saccharomyces cerevisiae (strain ATCC 204508 / S288c) GN=NOB1 PE=1 SV=1	1.99303e+06	1.94632e+06	2.68185e+06	2.42999e+06	1.13774e+06	1.4641e+06	1.61576e+06	1.30281e+06	1.67719e+06	2.40761e+06	2.95053e+06	2.69245e+06	945705	1.5447e+06	1.74964e+06	1.10468e+06
P38112	12	12	596.61	87280	ATP-dependent RNA helicase MAK5 OS=Saccharomyces cerevisiae (strain ATCC 204508 / S288c) GN=MAK5 PE=1 SV=1	1.69143e+06	1.43145e+06	1.87861e+06	1.8122e+06	837882	939954	702641	1.15861e+06	1.42339e+06	1.77071e+06	2.06682e+06	2.00793e+06	696460	991702	760864	982409
Q03778	2	2	55.52	24636	Riboflavin kinase OS=Saccharomyces cerevisiae (strain ATCC 204508 / S288c) GN=FMN1 PE=1 SV=1	479723	441899	574162	579147	926433	766261	825424	864075	403702	546631	631684	641700	770065	808448	893821	732667
P36135	3	3	284.41	37502	Probable secreted beta-glucosidase UTH1 OS=Saccharomyces cerevisiae (strain ATCC 204508 / S288c) GN=UTH1 PE=1 SV=2	1.94352e+06	2.0904e+06	2.31857e+06	2.17922e+06	1.6685e+06	1.79343e+06	1.88659e+06	1.85383e+06	1.63553e+06	2.58584e+06	2.55085e+06	2.4146e+06	1.38688e+06	1.89216e+06	2.04292e+06	1.5719e+06
Q03629	3	3	162.65	22447	Uncharacterized protein YML079W OS=Saccharomyces cerevisiae (strain ATCC 204508 / S288c) GN=YML079W PE=1 SV=1	1.71024e+06	1.63828e+06	1.59088e+06	1.3256e+06	2.78858e+06	3.20896e+06	3.49664e+06	2.82288e+06	1.43922e+06	2.02656e+06	1.75026e+06	1.46877e+06	2.31791e+06	3.38562e+06	3.78638e+06	2.39358e+06
P39985	16	16	842.62	116619	DNA polymerase V OS=Saccharomyces cerevisiae (strain ATCC 204508 / S288c) GN=POL5 PE=1 SV=1	2.77807e+06	3.07274e+06	2.85835e+06	2.8248e+06	2.09747e+06	2.28139e+06	2.15867e+06	2.60254e+06	2.33783e+06	3.801e+06	3.14472e+06	3.1299e+06	1.74345e+06	2.40699e+06	2.33754e+06	2.20675e+06
P32831	8	8	370.86	75204	Negative growth regulatory protein NGR1 OS=Saccharomyces cerevisiae (strain ATCC 204508 / S288c) GN=NGR1 PE=1 SV=2	966096	1.02073e+06	960405	948086	2.0994e+06	1.85293e+06	1.81986e+06	1.4892e+06	812999	1.26265e+06	1.05662e+06	1.05049e+06	1.74505e+06	1.95494e+06	1.97066e+06	1.26272e+06
P38109	3	3	141.09	58229	Putative serine carboxypeptidase YBR139W OS=Saccharomyces cerevisiae (strain ATCC 204508 / S288c) GN=YBR139W PE=1 SV=1	883380	1.0754e+06	773663	731978	2.04774e+06	2.18857e+06	2.52706e+06	1.51485e+06	743391	1.33028e+06	851172	811038	1.70211e+06	2.30906e+06	2.73646e+06	1.28448e+06
P32583	4	4	455.54	40992	Suppressor protein SRP40 OS=Saccharomyces cerevisiae (strain ATCC 204508 / S288c) GN=SRP40 PE=1 SV=2	5.3934e+06	5.38087e+06	4.21014e+06	4.78673e+06	2.8864e+06	3.28683e+06	3.23995e+06	4.0335e+06	4.53871e+06	6.65616e+06	4.63193e+06	5.30374e+06	2.39922e+06	3.46779e+06	3.50842e+06	3.42008e+06
P35996	2	2	105.13	15294	54S ribosomal protein L38, mitochondrial OS=Saccharomyces cerevisiae (strain ATCC 204508 / S288c) GN=MRPL38 PE=1 SV=1	236012	271580	260205	305251	502008	605337	570542	362484	198611	335946	286274	338221	417276	638663	617818	307357
P16965	3	3	167.96	9609	ATPase-stabilizing factor 15 kDa protein OS=Saccharomyces cerevisiae (strain ATCC 204508 / S288c) GN=STF2 PE=1 SV=2	1.32332e+06	1.04965e+06	1.66647e+06	1.17987e+06	8.13232e+06	5.0845e+06	5.79291e+06	3.51194e+06	1.11361e+06	1.29842e+06	1.83343e+06	1.30731e+06	6.75971e+06	5.36442e+06	6.27293e+06	2.97785e+06
P40318	12	12	883.14	152384	ERAD-associated E3 ubiquitin-protein ligase DOA10 OS=Saccharomyces cerevisiae (strain ATCC 204508 / S288c) GN=SSM4 PE=1 SV=1	2.2157e+06	1.86699e+06	1.89237e+06	2.03721e+06	1.24551e+06	1.48627e+06	1.42331e+06	1.50514e+06	1.86458e+06	2.30947e+06	2.08196e+06	2.25725e+06	1.03529e+06	1.5681e+06	1.54125e+06	1.27624e+06
Q08179	13	12	936.29	65136	Mitochondrial distribution and morphology protein 38 OS=Saccharomyces cerevisiae (strain ATCC 204508 / S288c) GN=MDM38 PE=1 SV=1	4.39327e+06	3.57978e+06	4.48557e+06	5.12701e+06	7.03228e+06	7.14033e+06	6.33036e+06	7.63298e+06	3.69707e+06	4.42821e+06	4.93496e+06	5.68077e+06	5.84534e+06	7.53344e+06	6.85491e+06	6.47216e+06
P21560	5	5	411.83	39173	Protein CBP3, mitochondrial OS=Saccharomyces cerevisiae (strain ATCC 204508 / S288c) GN=CBP3 PE=1 SV=1	774039	1.06288e+06	901315	1.05539e+06	2.13749e+06	1.74136e+06	1.87508e+06	1.86764e+06	651377	1.31479e+06	991614	1.16938e+06	1.77672e+06	1.83723e+06	2.03046e+06	1.58361e+06
P32473	9	9	662.69	40086	Pyruvate dehydrogenase E1 component subunit beta, mitochondrial OS=Saccharomyces cerevisiae (strain ATCC 204508 / S288c) GN=PDB1 PE=1 SV=2	2.68487e+07	3.05673e+07	2.66977e+07	2.80275e+07	3.98991e+07	3.98364e+07	3.78382e+07	3.52849e+07	2.2594e+07	3.78118e+07	2.93724e+07	3.10547e+07	3.31647e+07	4.20295e+07	4.09735e+07	2.99188e+07
Q08647	13	13	813.55	77183	Multisubstrate pseudouridine synthase 7 OS=Saccharomyces cerevisiae (strain ATCC 204508 / S288c) GN=PUS7 PE=1 SV=1	5.94091e+06	7.0004e+06	7.3819e+06	6.56e+06	4.495e+06	4.91473e+06	4.32661e+06	5.19494e+06	4.99946e+06	8.65953e+06	8.12145e+06	7.26854e+06	3.73631e+06	5.18531e+06	4.68512e+06	4.40489e+06
P40496	3	2	153.96	30494	37S ribosomal protein S25, mitochondrial OS=Saccharomyces cerevisiae (strain ATCC 204508 / S288c) GN=RSM25 PE=1 SV=1	243260	191672	268243	256911	608925	695884	628740	626893	204711	237099	295117	284660	506148	734196	680839	531555
Q12009	10	10	519.5	33598	tRNA (guanine-N(7)-)-methyltransferase OS=Saccharomyces cerevisiae (strain ATCC 204508 / S288c) GN=TRM8 PE=1 SV=1	3.92434e+06	4.44259e+06	4.40417e+06	4.00673e+06	3.24398e+06	3.54184e+06	3.49209e+06	3.03684e+06	3.30245e+06	5.49551e+06	4.8454e+06	4.43949e+06	2.69645e+06	3.73684e+06	3.78145e+06	2.575e+06
P23337	17	13	1290.47	80859	Glycogen [starch] synthase isoform 1 OS=Saccharomyces cerevisiae (strain ATCC 204508 / S288c) GN=GSY1 PE=1 SV=3	1.71921e+06	1.67859e+06	1.87386e+06	2.45621e+06	7.82562e+06	5.79947e+06	5.66078e+06	4.50685e+06	1.44677e+06	2.07642e+06	2.06159e+06	2.7215e+06	6.50477e+06	6.11876e+06	6.12984e+06	3.82145e+06
P32795	15	15	871.9	82177	Mitochondrial inner membrane i-AAA protease supercomplex subunit YME1 OS=Saccharomyces cerevisiae (strain ATCC 204508 / S288c) GN=YME1 PE=1 SV=1	2.61571e+06	2.58982e+06	2.27863e+06	2.52759e+06	3.47909e+06	3.88166e+06	3.59895e+06	4.36764e+06	2.2012e+06	3.20362e+06	2.50691e+06	2.80059e+06	2.89187e+06	4.09536e+06	3.89717e+06	3.70341e+06
P00431	12	12	638.45	40385	Cytochrome c peroxidase, mitochondrial OS=Saccharomyces cerevisiae (strain ATCC 204508 / S288c) GN=CCP1 PE=1 SV=2	3.99748e+06	3.75088e+06	3.72952e+06	3.65131e+06	7.92284e+06	6.89273e+06	6.4071e+06	5.40501e+06	3.364e+06	4.63986e+06	4.10316e+06	4.04568e+06	6.58559e+06	7.27221e+06	6.93801e+06	4.58302e+06
Q06137	2	2	84.21	58691	Putative 6-phosphofructo-2-kinase/fructose-2,6-bisphosphatase YLR345W OS=Saccharomyces cerevisiae (strain ATCC 204508 / S288c) GN=YLR345W PE=1 SV=1	85306.8	107808	126590	127223	517161	475525	470728	542728	71788.3	133359	139272	140964	429872	501704	509733	460190
Q12333	2	2	106.46	71601	Ferric/cupric reductase transmembrane component 7 OS=Saccharomyces cerevisiae (strain ATCC 204508 / S288c) GN=FRE7 PE=1 SV=2	95314.7	185618	84541.1	264537	2.1786e+06	2.93457e+06	2.22753e+06	1.44235e+06	80210.2	229610	93010.9	293109	1.81089e+06	3.09614e+06	2.41211e+06	1.223e+06
Q07824	2	2	223.91	64914	Polyamine transporter 1 OS=Saccharomyces cerevisiae (strain ATCC 204508 / S288c) GN=TPO1 PE=1 SV=1	871616	833756	1.03101e+06	997255	256006	402583	332567	261094	733491	1.03136e+06	1.13431e+06	1.10497e+06	212796	424747	360124	221387
P28274	24	20	1738.81	65125	CTP synthase 1 OS=Saccharomyces cerevisiae (strain ATCC 204508 / S288c) GN=URA7 PE=1 SV=2	2.3709e+07	2.2024e+07	2.10369e+07	1.90024e+07	1.41051e+07	1.39213e+07	1.33588e+07	1.07011e+07	1.99518e+07	2.72438e+07	2.31444e+07	2.10548e+07	1.17244e+07	1.46877e+07	1.44658e+07	9.07371e+06
P13188	40	39	2749.37	93531	Glutamine--tRNA ligase OS=Saccharomyces cerevisiae (strain ATCC 204508 / S288c) GN=GLN4 PE=1 SV=2	1.1058e+07	1.01882e+07	1.13447e+07	1.07592e+07	7.96144e+06	8.47565e+06	8.68211e+06	9.21941e+06	9.30563e+06	1.26028e+07	1.24813e+07	1.19213e+07	6.61767e+06	8.94227e+06	9.40153e+06	7.81733e+06
P19882	38	38	3002.1	60999	Heat shock protein 60, mitochondrial OS=Saccharomyces cerevisiae (strain ATCC 204508 / S288c) GN=HSP60 PE=1 SV=1	5.47404e+07	6.16542e+07	6.24167e+07	6.50047e+07	8.36868e+07	1.03971e+08	9.66271e+07	1.17501e+08	4.60657e+07	7.62666e+07	6.86699e+07	7.20257e+07	6.95617e+07	1.09696e+08	1.04634e+08	9.96312e+07
P41910	2	2	69.28	44991	Repressor of RNA polymerase III transcription MAF1 OS=Saccharomyces cerevisiae (strain ATCC 204508 / S288c) GN=MAF1 PE=1 SV=1	361832	330668	306941	258542	616736	527508	535352	600075	304492	409038	337692	286467	512641	556550	579713	508816
P53734	4	4	245.46	70603	ATP-dependent RNA helicase DBP6 OS=Saccharomyces cerevisiae (strain ATCC 204508 / S288c) GN=DBP6 PE=1 SV=1	2.66165e+06	2.96405e+06	2.66502e+06	3.00306e+06	1.90501e+06	2.05202e+06	1.88385e+06	1.96243e+06	2.23986e+06	3.66654e+06	2.93202e+06	3.32741e+06	1.58348e+06	2.16499e+06	2.03995e+06	1.66398e+06
P53336	2	2	125.88	38864	Putative methyltransferase YGR283C OS=Saccharomyces cerevisiae (strain ATCC 204508 / S288c) GN=YGR283C PE=1 SV=1	520394	504924	543763	559455	197575	282477	255539	367132	437928	624593	598240	619880	164227	298029	276713	311299
P32454	29	28	2102.69	108086	Aminopeptidase 2, mitochondrial OS=Saccharomyces cerevisiae (strain ATCC 204508 / S288c) GN=APE2 PE=1 SV=4	1.76829e+07	1.81948e+07	1.96246e+07	1.64854e+07	2.73981e+07	2.49666e+07	2.2329e+07	2.53259e+07	1.48807e+07	2.2507e+07	2.15907e+07	1.82659e+07	2.27737e+07	2.63411e+07	2.41792e+07	2.14744e+07
P39719	5	5	311.4	87983	Flavin carrier protein 2 OS=Saccharomyces cerevisiae (strain ATCC 204508 / S288c) GN=FLC2 PE=1 SV=2	529858	574214	616891	587663	1.09119e+06	896458	927407	1.02412e+06	445891	710305	678694	651135	907010	945812	1.00425e+06	868370
P32604	4	4	269.31	52847	Fructose-2,6-bisphosphatase OS=Saccharomyces cerevisiae (strain ATCC 204508 / S288c) GN=FBP26 PE=1 SV=2	238937	387181	303455	354087	1.17158e+06	882235	885531	980443	201073	478945	333857	392331	973838	930806	958908	831337
P35180	3	3	277.76	20304	Mitochondrial import receptor subunit TOM20 OS=Saccharomyces cerevisiae (strain ATCC 204508 / S288c) GN=TOM20 PE=1 SV=1	6.75893e+06	6.97426e+06	8.92707e+06	6.98845e+06	1.14271e+07	1.16472e+07	1.23489e+07	1.19485e+07	5.68784e+06	8.62719e+06	9.82143e+06	7.74326e+06	9.49838e+06	1.22884e+07	1.33721e+07	1.01314e+07
O13547	5	5	759.74	23710	Covalently-linked cell wall protein 14 OS=Saccharomyces cerevisiae (strain ATCC 204508 / S288c) GN=CCW14 PE=1 SV=1	5.92156e+07	5.63288e+07	4.89748e+07	4.66384e+07	1.02396e+08	8.26059e+07	8.40933e+07	8.03794e+07	4.98317e+07	6.9679e+07	5.38813e+07	5.16757e+07	8.51131e+07	8.71537e+07	9.10615e+07	6.81553e+07
P48361	6	6	369.27	127185	Activator of SKN7 protein 10 OS=Saccharomyces cerevisiae (strain ATCC 204508 / S288c) GN=ASK10 PE=1 SV=2	275238	291358	273042	239632	374599	409317	461698	454489	231621	360411	300397	265514	311372	431852	499955	385371
P36152	7	6	494.09	39031	Fe-S cluster assembly protein DRE2 OS=Saccharomyces cerevisiae (strain ATCC 204508 / S288c) GN=DRE2 PE=1 SV=1	3.69026e+06	3.30169e+06	2.58078e+06	3.08097e+06	944978	1.48213e+06	792593	1.41647e+06	3.10547e+06	4.08421e+06	2.83933e+06	3.41374e+06	785480	1.56373e+06	858269	1.20105e+06
Q07825	10	10	459.36	85783	Putative Xaa-Pro aminopeptidase FRA1 OS=Saccharomyces cerevisiae (strain ATCC 204508 / S288c) GN=FRA1 PE=1 SV=1	735628	960558	763525	968044	1.34574e+06	1.25506e+06	1.2928e+06	1.31068e+06	619053	1.18821e+06	840019	1.0726e+06	1.1186e+06	1.32416e+06	1.39993e+06	1.11135e+06
Q06449	4	3	163.49	23582	[PSI+] inducibility protein 3 OS=Saccharomyces cerevisiae (strain ATCC 204508 / S288c) GN=PIN3 PE=1 SV=1	2.20432e+06	3.01809e+06	2.59587e+06	2.25529e+06	4.92807e+06	4.6709e+06	4.32945e+06	4.83679e+06	1.855e+06	3.73339e+06	2.85594e+06	2.49888e+06	4.09628e+06	4.92805e+06	4.6882e+06	4.10121e+06
P19211	5	2	283.17	17234	Eukaryotic translation initiation factor 5A-2 OS=Saccharomyces cerevisiae (strain ATCC 204508 / S288c) GN=ANB1 PE=1 SV=3	215679	419544	512482	243835	37614.2	52875.3	52537.8	72622.9	181501	518978	563825	270171	31265.5	55786.3	56891.2	61578.4
Q06689	7	7	515.44	73164	Cell membrane protein YLR413W OS=Saccharomyces cerevisiae (strain ATCC 204508 / S288c) GN=YLR413W PE=1 SV=1	5.79347e+06	4.97915e+06	6.59305e+06	5.37874e+06	2.03504e+06	2.80521e+06	2.5701e+06	3.89428e+06	4.87538e+06	6.15923e+06	7.25358e+06	5.95969e+06	1.69156e+06	2.95965e+06	2.78306e+06	3.30204e+06
P08525	3	3	132.63	10967	Cytochrome b-c1 complex subunit 8 OS=Saccharomyces cerevisiae (strain ATCC 204508 / S288c) GN=QCR8 PE=1 SV=2	322053	222769	221608	327330	3.36346e+06	2.97593e+06	972732	1.24084e+06	271018	275566	243810	362684	2.79576e+06	3.13977e+06	1.05333e+06	1.05213e+06
P21524;P21672	35	35	2474.36	100296	Ribonucleoside-diphosphate reductase large chain 1 OS=Saccharomyces cerevisiae (strain ATCC 204508 / S288c) GN=RNR1 PE=1 SV=2	2.26619e+07	2.44434e+07	2.64497e+07	2.44687e+07	8.86464e+06	1.47103e+07	1.0718e+07	1.48988e+07	1.90707e+07	3.02366e+07	2.90996e+07	2.71115e+07	7.36842e+06	1.55201e+07	1.16061e+07	1.2633e+07
P47150	3	2	137.82	27970	37S ribosomal protein S7, mitochondrial OS=Saccharomyces cerevisiae (strain ATCC 204508 / S288c) GN=RSM7 PE=1 SV=1	54026.3	49123.5	85904.2	45217.5	147172	212764	168486	222822	45464.8	60766	94510.6	50101.4	122332	224478	182447	188935
P14832	9	9	942.82	17494	Peptidyl-prolyl cis-trans isomerase OS=Saccharomyces cerevisiae (strain ATCC 204508 / S288c) GN=CPR1 PE=1 SV=3	8.53092e+07	1.0615e+08	1.061e+08	1.06307e+08	1.21975e+08	1.24501e+08	1.10134e+08	1.34062e+08	7.17903e+07	1.31308e+08	1.16729e+08	1.17789e+08	1.01388e+08	1.31356e+08	1.1926e+08	1.13674e+08
Q07623	8	8	409.64	25201	Nucleolar protein 6 OS=Saccharomyces cerevisiae (strain ATCC 204508 / S288c) GN=NOP6 PE=1 SV=1	3.61018e+06	3.44487e+06	3.47204e+06	3.63642e+06	2.68285e+06	2.77595e+06	2.89201e+06	3.46282e+06	3.03807e+06	4.26132e+06	3.81989e+06	4.02919e+06	2.23003e+06	2.92878e+06	3.13165e+06	2.93619e+06
P16387	32	32	1991.56	46712	Pyruvate dehydrogenase E1 component subunit alpha, mitochondrial OS=Saccharomyces cerevisiae (strain ATCC 204508 / S288c) GN=PDA1 PE=1 SV=2	2.43368e+07	2.79113e+07	2.39902e+07	2.34742e+07	3.3174e+07	3.48253e+07	3.11856e+07	3.29938e+07	2.04802e+07	3.45264e+07	2.63936e+07	2.60096e+07	2.75748e+07	3.67426e+07	3.37697e+07	2.79761e+07
P11491	10	8	712.56	63136	Repressible alkaline phosphatase OS=Saccharomyces cerevisiae (strain ATCC 204508 / S288c) GN=PHO8 PE=1 SV=2	2.39151e+06	3.21131e+06	2.56489e+06	3.06617e+06	3.36209e+06	3.51262e+06	3.68352e+06	3.36194e+06	2.01253e+06	3.9724e+06	2.82186e+06	3.39734e+06	2.79462e+06	3.70601e+06	3.98874e+06	2.85066e+06
P09032	8	8	475.88	66286	Translation initiation factor eIF-2B subunit gamma OS=Saccharomyces cerevisiae (strain ATCC 204508 / S288c) GN=GCD1 PE=1 SV=3	5.87251e+06	6.50676e+06	6.53817e+06	6.3313e+06	4.44473e+06	5.30523e+06	5.0649e+06	5.04847e+06	4.94189e+06	8.0489e+06	7.1932e+06	7.01513e+06	3.69453e+06	5.5973e+06	5.48459e+06	4.2807e+06
P47039	8	8	489.87	50393	Probable kynurenine--oxoglutarate transaminase BNA3 OS=Saccharomyces cerevisiae (strain ATCC 204508 / S288c) GN=BNA3 PE=1 SV=1	1.62886e+06	1.83345e+06	1.62393e+06	1.64999e+06	2.79832e+06	2.60507e+06	2.22666e+06	2.53672e+06	1.37074e+06	2.26798e+06	1.78662e+06	1.82821e+06	2.32601e+06	2.74849e+06	2.41116e+06	2.15093e+06
P42942	7	7	463.62	45471	Uncharacterized GTP-binding protein YGR210C OS=Saccharomyces cerevisiae (strain ATCC 204508 / S288c) GN=YGR210C PE=1 SV=1	2.1285e+06	2.41976e+06	2.30468e+06	2.54501e+06	1.65678e+06	1.76197e+06	1.6963e+06	1.93837e+06	1.7912e+06	2.99325e+06	2.53558e+06	2.81989e+06	1.37714e+06	1.85897e+06	1.83686e+06	1.64359e+06
P41696	2	2	65.9	101564	Asparagine-rich zinc finger protein AZF1 OS=Saccharomyces cerevisiae (strain ATCC 204508 / S288c) GN=AZF1 PE=1 SV=1	17935.6	11034.1	21831.7	18961.3	105790	73043.7	89777.3	73174.1	15093.3	13649.2	24019	21009.3	87934.2	77065.1	97216.4	62045.8
P22133	5	5	323.76	40990	Malate dehydrogenase, cytoplasmic OS=Saccharomyces cerevisiae (strain ATCC 204508 / S288c) GN=MDH2 PE=1 SV=2	3.15183e+06	3.48365e+06	2.95201e+06	2.76798e+06	5.20015e+06	4.7817e+06	4.42536e+06	2.82963e+06	2.65236e+06	4.3093e+06	3.24776e+06	3.06695e+06	4.32244e+06	5.04496e+06	4.79206e+06	2.3993e+06
Q3E705	3	3	183.73	27162	rRNA-processing protein EFG1 OS=Saccharomyces cerevisiae (strain ATCC 204508 / S288c) GN=EFG1 PE=1 SV=2	1.87515e+06	1.97536e+06	2.48273e+06	2.2164e+06	1.09889e+06	1.26725e+06	1.21635e+06	1.51504e+06	1.57799e+06	2.44353e+06	2.73146e+06	2.45579e+06	913413	1.33702e+06	1.31714e+06	1.28463e+06
P19414	37	36	3078.23	85714	Aconitate hydratase, mitochondrial OS=Saccharomyces cerevisiae (strain ATCC 204508 / S288c) GN=ACO1 PE=1 SV=2	2.38882e+07	2.78586e+07	3.28159e+07	3.30489e+07	8.35394e+07	7.79703e+07	5.21891e+07	6.44624e+07	2.01026e+07	3.44613e+07	3.61036e+07	3.66185e+07	6.94392e+07	8.22629e+07	5.65136e+07	5.4659e+07
P38747	6	6	458.46	36432	OTU domain-containing protein 2 OS=Saccharomyces cerevisiae (strain ATCC 204508 / S288c) GN=OTU2 PE=1 SV=1	1.29949e+06	1.30863e+06	1.35885e+06	1.34002e+06	1.0117e+06	1.11708e+06	1.05785e+06	1.2041e+06	1.09356e+06	1.61878e+06	1.49498e+06	1.48475e+06	840940	1.17858e+06	1.14551e+06	1.02098e+06
Q06705	7	7	469.82	47547	Phosphatidylinositol transfer protein CSR1 OS=Saccharomyces cerevisiae (strain ATCC 204508 / S288c) GN=CSR1 PE=1 SV=1	5.5427e+06	6.96506e+06	6.61325e+06	6.91083e+06	4.02738e+06	4.67397e+06	4.57325e+06	4.54359e+06	4.66435e+06	8.61581e+06	7.2758e+06	7.65726e+06	3.34762e+06	4.9313e+06	4.9522e+06	3.8526e+06
P48527	2	2	137.79	55652	Tyrosine--tRNA ligase, mitochondrial OS=Saccharomyces cerevisiae (strain ATCC 204508 / S288c) GN=MSY1 PE=1 SV=1	66506.7	77431.2	100953	94163.7	217989	334163	340389	222258	55967.4	95782.8	111067	104334	181196	352560	368594	188457
Q05931	5	5	211.7	72377	Heat shock protein SSQ1, mitochondrial OS=Saccharomyces cerevisiae (strain ATCC 204508 / S288c) GN=SSQ1 PE=1 SV=1	419841	402275	476930	379957	593905	622325	616291	602746	353309	497616	524712	420995	493663	656587	667359	511081
Q12449	10	10	671.11	39582	Hsp90 co-chaperone AHA1 OS=Saccharomyces cerevisiae (strain ATCC 204508 / S288c) GN=AHA1 PE=1 SV=1	6.07442e+06	6.10827e+06	4.52684e+06	6.82851e+06	9.69222e+06	9.39523e+06	8.77987e+06	1.03906e+07	5.11181e+06	7.55596e+06	4.98036e+06	7.56604e+06	8.05632e+06	9.91247e+06	9.50739e+06	8.81042e+06
P23248	24	4	2256.25	28852	40S ribosomal protein S1-B OS=Saccharomyces cerevisiae (strain ATCC 204508 / S288c) GN=RPS1B PE=1 SV=3	1.06045e+08	1.13861e+08	1.10404e+08	1.16007e+08	7.87805e+07	8.94764e+07	8.52991e+07	9.63366e+07	8.92397e+07	1.40846e+08	1.21465e+08	1.28537e+08	6.54836e+07	9.44025e+07	9.23672e+07	8.16858e+07
P38789	8	3	315.06	51846	Ribosome biogenesis protein SSF1 OS=Saccharomyces cerevisiae (strain ATCC 204508 / S288c) GN=SSF1 PE=1 SV=1	2.25598e+06	3.18374e+06	2.40962e+06	2.49324e+06	1.18329e+06	1.39106e+06	1.10445e+06	1.64846e+06	1.89848e+06	3.9383e+06	2.65103e+06	2.76253e+06	983568	1.46765e+06	1.19597e+06	1.39777e+06
P04046	18	18	1555.45	57482	Amidophosphoribosyltransferase OS=Saccharomyces cerevisiae (strain ATCC 204508 / S288c) GN=ADE4 PE=1 SV=2	6.51597e+06	7.01599e+06	8.07704e+06	8.5022e+06	3.88937e+06	4.9635e+06	4.39605e+06	5.73627e+06	5.48339e+06	8.67881e+06	8.88624e+06	9.4205e+06	3.2329e+06	5.23676e+06	4.76032e+06	4.8639e+06
P47771	12	5	619.81	55495	Aldehyde dehydrogenase [NAD(P)+] 1 OS=Saccharomyces cerevisiae (strain ATCC 204508 / S288c) GN=ALD2 PE=1 SV=2	796605	1.0242e+06	731308	658629	2.23637e+06	1.39285e+06	1.47529e+06	1.56518e+06	670367	1.26695e+06	804575	729766	1.85891e+06	1.46953e+06	1.59753e+06	1.32715e+06
P53228	8	8	425.78	37344	Transaldolase NQM1 OS=Saccharomyces cerevisiae (strain ATCC 204508 / S288c) GN=NQM1 PE=1 SV=1	473719	413206	263505	219280	1.48974e+06	1.45908e+06	1.63601e+06	1.40065e+06	398649	511138	289904	242964	1.23829e+06	1.53941e+06	1.77157e+06	1.18764e+06
P34241	13	13	598.22	204014	Nucleolar pre-ribosomal-associated protein 1 OS=Saccharomyces cerevisiae (strain ATCC 204508 / S288c) GN=URB1 PE=1 SV=2	3.39188e+06	3.03615e+06	2.71325e+06	3.02609e+06	2.02217e+06	1.89238e+06	1.6595e+06	2.16431e+06	2.85437e+06	3.75573e+06	2.98508e+06	3.35293e+06	1.68086e+06	1.99657e+06	1.79701e+06	1.83517e+06
Q07381	12	12	915.2	90976	Ribosome biogenesis protein TSR1 OS=Saccharomyces cerevisiae (strain ATCC 204508 / S288c) GN=TSR1 PE=1 SV=1	5.20056e+06	4.58517e+06	4.77596e+06	4.53214e+06	3.18726e+06	3.72745e+06	3.56559e+06	2.72231e+06	4.37643e+06	5.67187e+06	5.25444e+06	5.02165e+06	2.6493e+06	3.93266e+06	3.86104e+06	2.3083e+06
P10964	52	49	4018.96	187683	DNA-directed RNA polymerase I subunit RPA190 OS=Saccharomyces cerevisiae (strain ATCC 204508 / S288c) GN=RPA190 PE=1 SV=2	1.31549e+07	1.4309e+07	1.40237e+07	1.49498e+07	8.23458e+06	9.03114e+06	9.18787e+06	1.09443e+07	1.10703e+07	1.77003e+07	1.54286e+07	1.65645e+07	6.8447e+06	9.52834e+06	9.9492e+06	9.27989e+06
P11154	41	11	2755.94	130702	Pyruvate carboxylase 1 OS=Saccharomyces cerevisiae (strain ATCC 204508 / S288c) GN=PYC1 PE=1 SV=2	6.98396e+06	9.43463e+06	6.6841e+06	6.5547e+06	2.5496e+07	1.85289e+07	2.27402e+07	1.29853e+07	5.87721e+06	1.16707e+07	7.35374e+06	7.26267e+06	2.11927e+07	1.9549e+07	2.46245e+07	1.10105e+07
Q01329	5	5	319.33	88646	Pre-tRNA-processing protein PTA1 OS=Saccharomyces cerevisiae (strain ATCC 204508 / S288c) GN=PTA1 PE=1 SV=1	696951	728448	720190	732259	850644	926957	895964	1.0016e+06	586506	901094	792342	811348	707068	977990	970205	849273
P53115	5	5	252.67	171863	Putative DNA helicase INO80 OS=Saccharomyces cerevisiae (strain ATCC 204508 / S288c) GN=INO80 PE=1 SV=1	1.12487e+06	1.03809e+06	1.15352e+06	1.20294e+06	1.23533e+06	1.13161e+06	1.16933e+06	1.30946e+06	946612	1.28413e+06	1.26908e+06	1.33287e+06	1.02682e+06	1.19391e+06	1.26622e+06	1.11032e+06
P47019	6	6	273.73	19275	Ribosome biogenesis protein ALB1 OS=Saccharomyces cerevisiae (strain ATCC 204508 / S288c) GN=ALB1 PE=1 SV=1	2.69065e+06	2.36886e+06	2.3205e+06	1.83223e+06	1.16964e+06	1.55619e+06	1.57124e+06	1.61361e+06	2.26426e+06	2.93029e+06	2.55298e+06	2.03012e+06	972222	1.64187e+06	1.70144e+06	1.36821e+06
Q03104	12	12	814.54	59552	Meiotic sister chromatid recombination protein 1 OS=Saccharomyces cerevisiae (strain ATCC 204508 / S288c) GN=MSC1 PE=1 SV=1	946758	1.01234e+06	1.31844e+06	900076	4.60464e+06	2.43995e+06	2.63918e+06	1.73998e+06	796726	1.25227e+06	1.45053e+06	997292	3.82744e+06	2.57427e+06	2.85787e+06	1.47536e+06
P53219	3	3	117.68	38771	Abhydrolase domain-containing protein IMO32 OS=Saccharomyces cerevisiae (strain ATCC 204508 / S288c) GN=IMO32 PE=1 SV=1	131058	98444.2	108180	85088.2	376446	313829	286865	324178	110290	121776	119018	94278.5	312907	331106	310636	274877
P38708	35	35	2567.24	77851	Putative proline--tRNA ligase YHR020W OS=Saccharomyces cerevisiae (strain ATCC 204508 / S288c) GN=YHR020W PE=1 SV=1	4.52637e+07	3.99764e+07	3.97569e+07	4.01003e+07	2.88866e+07	3.42661e+07	3.28447e+07	3.48266e+07	3.80908e+07	4.94509e+07	4.37399e+07	4.44315e+07	2.4011e+07	3.61526e+07	3.55663e+07	2.95302e+07
Q12443	8	8	595.19	44332	Reticulon-like protein 2 OS=Saccharomyces cerevisiae (strain ATCC 204508 / S288c) GN=RTN2 PE=1 SV=1	333087	183041	341118	219455	2.81818e+06	1.1463e+06	1.55323e+06	896260	280303	226423	375293	243158	2.34251e+06	1.20941e+06	1.68193e+06	759957
Q12497	2	2	45.69	10839	Protein FMP16, mitochondrial OS=Saccharomyces cerevisiae (strain ATCC 204508 / S288c) GN=FMP16 PE=1 SV=1	98953.5	95578.7	128403	225026	2.40802e+06	1.24983e+06	1.16716e+06	1.29417e+06	83272.4	118231	141267	249331	2.00158e+06	1.31864e+06	1.26387e+06	1.09735e+06
P36136	8	8	664.75	31231	Sedoheptulose 1,7-bisphosphatase OS=Saccharomyces cerevisiae (strain ATCC 204508 / S288c) GN=SHB17 PE=1 SV=1	1.28708e+07	1.48827e+07	1.35431e+07	1.5302e+07	9.32158e+06	1.0444e+07	9.88387e+06	1.12738e+07	1.08312e+07	1.841e+07	1.48999e+07	1.69548e+07	7.74824e+06	1.1019e+07	1.07029e+07	9.55925e+06
Q07395	5	5	261.18	70576	Synchronized import protein 1 OS=Saccharomyces cerevisiae (strain ATCC 204508 / S288c) GN=SYO1 PE=1 SV=1	1.6916e+06	1.62708e+06	1.92433e+06	1.61714e+06	584178	815996	784265	738525	1.42353e+06	2.0127e+06	2.11712e+06	1.7918e+06	485577	860921	849252	626210
Q03305	7	7	320.94	47667	Protein arginine N-methyltransferase 2 OS=Saccharomyces cerevisiae (strain ATCC 204508 / S288c) GN=RMT2 PE=1 SV=1	1.37272e+06	1.61456e+06	1.55259e+06	1.45614e+06	612178	733897	733450	917943	1.15519e+06	1.99721e+06	1.70814e+06	1.61341e+06	508852	774301	794225	778342
Q06169	8	8	626.34	59482	Peroxisomal membrane protein PEX30 OS=Saccharomyces cerevisiae (strain ATCC 204508 / S288c) GN=PEX30 PE=1 SV=1	900678	1.08473e+06	808220	1.00304e+06	1.24916e+06	1.15272e+06	1.23015e+06	1.37785e+06	757948	1.34182e+06	889192	1.11138e+06	1.03832e+06	1.21619e+06	1.33208e+06	1.1683e+06
P80210	16	16	1504.01	48420	Adenylosuccinate synthetase OS=Saccharomyces cerevisiae (strain ATCC 204508 / S288c) GN=ADE12 PE=1 SV=3	2.69987e+07	2.93396e+07	3.10321e+07	3.01911e+07	1.79494e+07	2.03438e+07	1.98795e+07	2.15039e+07	2.27202e+07	3.62932e+07	3.41411e+07	3.3452e+07	1.49198e+07	2.14638e+07	2.15268e+07	1.82336e+07
Q04599	5	5	333.29	31148	54S ribosomal protein L1, mitochondrial OS=Saccharomyces cerevisiae (strain ATCC 204508 / S288c) GN=MRPL1 PE=1 SV=1	2.07519e+06	1.63757e+06	2.10226e+06	1.65797e+06	3.11066e+06	2.82742e+06	2.95202e+06	3.75723e+06	1.74634e+06	2.02569e+06	2.31288e+06	1.83705e+06	2.58563e+06	2.98308e+06	3.19663e+06	3.18583e+06
Q08965	14	13	775.44	135829	Ribosome biogenesis protein BMS1 OS=Saccharomyces cerevisiae (strain ATCC 204508 / S288c) GN=BMS1 PE=1 SV=1	2.29031e+06	2.43352e+06	2.44325e+06	2.48147e+06	1.48844e+06	1.75707e+06	1.69337e+06	1.90878e+06	1.92736e+06	3.01027e+06	2.68803e+06	2.74949e+06	1.23722e+06	1.8538e+06	1.83369e+06	1.61849e+06
Q08726	3	3	119.95	40041	GPN-loop GTPase 2 OS=Saccharomyces cerevisiae (strain ATCC 204508 / S288c) GN=GPN2 PE=1 SV=1	766730	759380	734178	665624	376276	466655	440517	423171	645226	939357	807732	737516	312767	492346	477020	358816
P53193	2	2	98.11	21821	J-type co-chaperone JAC1, mitochondrial OS=Saccharomyces cerevisiae (strain ATCC 204508 / S288c) GN=JAC1 PE=1 SV=1	882899	750556	867562	872541	1.48142e+06	1.2506e+06	1.50195e+06	1.38596e+06	742986	928442	954479	966782	1.23138e+06	1.31945e+06	1.62641e+06	1.17518e+06
P39522	31	31	2467.21	63391	Dihydroxy-acid dehydratase, mitochondrial OS=Saccharomyces cerevisiae (strain ATCC 204508 / S288c) GN=ILV3 PE=1 SV=2	4.06668e+07	3.9918e+07	3.81754e+07	3.63182e+07	2.34563e+07	3.19958e+07	2.99732e+07	3.15428e+07	3.42223e+07	4.93787e+07	4.2e+07	4.02409e+07	1.94972e+07	3.37573e+07	3.24569e+07	2.67458e+07
P35723	3	3	168.9	23559	Endoplasmic reticulum transmembrane protein 1 OS=Saccharomyces cerevisiae (strain ATCC 204508 / S288c) GN=YET1 PE=1 SV=2	6.48339e+06	7.61017e+06	6.88247e+06	6.1184e+06	9.0144e+06	7.78526e+06	7.81779e+06	8.45051e+06	5.45597e+06	9.41382e+06	7.57199e+06	6.77924e+06	7.49291e+06	8.21388e+06	8.46559e+06	7.16536e+06
P15891	22	22	2085.3	65593	Actin-binding protein OS=Saccharomyces cerevisiae (strain ATCC 204508 / S288c) GN=ABP1 PE=1 SV=4	3.5319e+07	3.48985e+07	3.73705e+07	4.06983e+07	5.99455e+07	5.45226e+07	4.81241e+07	5.10185e+07	2.9722e+07	4.31696e+07	4.11145e+07	4.5094e+07	4.98276e+07	5.75243e+07	5.21118e+07	4.32597e+07
P14908	2	2	57.66	39986	Mitochondrial transcription factor 1 OS=Saccharomyces cerevisiae (strain ATCC 204508 / S288c) GN=MTF1 PE=1 SV=4	308584	348656	338083	322476	351270	480140	418894	462788	259683	431289	371954	357306	291981	506574	453605	392408
P40893	14	14	1097.04	22010	Regulation of enolase protein 1 OS=Saccharomyces cerevisiae (strain ATCC 204508 / S288c) GN=REE1 PE=1 SV=1	2.07175e+07	1.29371e+07	9.24526e+06	1.42743e+07	3.73859e+07	3.61569e+07	3.10258e+07	3.11306e+07	1.74344e+07	1.60033e+07	1.01715e+07	1.58161e+07	3.10757e+07	3.81474e+07	3.35966e+07	2.63962e+07
P23180	6	6	437.67	53501	Probable oxidoreductase AIM17 OS=Saccharomyces cerevisiae (strain ATCC 204508 / S288c) GN=AIM17 PE=1 SV=2	2.78504e+06	3.37495e+06	3.26687e+06	3.76318e+06	8.37768e+06	8.15772e+06	1.006e+07	5.15645e+06	2.34369e+06	4.17482e+06	3.59416e+06	4.16964e+06	6.96366e+06	8.60683e+06	1.08936e+07	4.37226e+06
P39676	20	20	2237.21	44846	Flavohemoprotein OS=Saccharomyces cerevisiae (strain ATCC 204508 / S288c) GN=YHB1 PE=1 SV=2	5.70614e+07	5.47271e+07	6.74959e+07	6.4476e+07	8.98558e+07	9.54366e+07	9.88583e+07	8.93865e+07	4.80189e+07	6.76977e+07	7.4258e+07	7.144e+07	7.46895e+07	1.00691e+08	1.0705e+08	7.57926e+07
P38084	6	6	305.92	68296	Leu/Val/Ile amino-acid permease OS=Saccharomyces cerevisiae (strain ATCC 204508 / S288c) GN=BAP2 PE=1 SV=2	1.46624e+06	1.11359e+06	1.34932e+06	1.30468e+06	2.00402e+06	2.46056e+06	1.93037e+06	1.9738e+06	1.23389e+06	1.37752e+06	1.4845e+06	1.4456e+06	1.66577e+06	2.59603e+06	2.09033e+06	1.67363e+06
P40024	28	27	2005.91	68506	ABC transporter ATP-binding protein ARB1 OS=Saccharomyces cerevisiae (strain ATCC 204508 / S288c) GN=ARB1 PE=1 SV=1	2.8054e+07	2.30043e+07	2.92983e+07	2.71583e+07	1.9167e+07	2.28251e+07	1.92796e+07	2.26581e+07	2.36083e+07	2.84564e+07	3.22335e+07	3.00916e+07	1.59319e+07	2.40817e+07	2.08771e+07	1.92122e+07
P52490	4	4	173.03	17514	Ubiquitin-conjugating enzyme E2 13 OS=Saccharomyces cerevisiae (strain ATCC 204508 / S288c) GN=UBC13 PE=1 SV=1	3.20182e+06	3.84549e+06	3.40965e+06	3.31729e+06	3.3433e+06	3.5434e+06	3.70744e+06	3.58663e+06	2.69443e+06	4.75689e+06	3.75125e+06	3.67558e+06	2.779e+06	3.73848e+06	4.01465e+06	3.04118e+06
Q12498	2	2	88.29	32050	Pheromone-regulated membrane protein 4 OS=Saccharomyces cerevisiae (strain ATCC 204508 / S288c) GN=PRM4 PE=1 SV=1	21567.1	7821.61	16199.1	15277.6	113643	97338.5	80901.5	106476	18149.4	9675.36	17822.1	16927.7	94461.7	102697	87605.2	90283
P36047	7	5	468.14	38921	Protein phosphatase 1 regulatory subunit SDS22 OS=Saccharomyces cerevisiae (strain ATCC 204508 / S288c) GN=SDS22 PE=1 SV=1	2.86094e+06	2.71076e+06	3.1138e+06	2.72025e+06	4.61257e+06	3.59641e+06	3.63367e+06	3.30547e+06	2.40757e+06	3.35322e+06	3.42576e+06	3.01406e+06	3.83404e+06	3.79441e+06	3.93476e+06	2.80278e+06
P38837	4	4	296.78	32422	Protein NSG1 OS=Saccharomyces cerevisiae (strain ATCC 204508 / S288c) GN=NSG1 PE=1 SV=1	2.29576e+06	2.09532e+06	2.072e+06	1.96749e+06	1.52231e+06	1.98351e+06	1.84528e+06	2.473e+06	1.93195e+06	2.59193e+06	2.27958e+06	2.17999e+06	1.26536e+06	2.09271e+06	1.99818e+06	2.09691e+06
P40581	6	5	312.65	18801	Peroxiredoxin HYR1 OS=Saccharomyces cerevisiae (strain ATCC 204508 / S288c) GN=HYR1 PE=1 SV=1	5.35788e+06	6.78042e+06	6.29666e+06	5.76279e+06	1.02965e+07	8.38367e+06	9.11423e+06	8.67364e+06	4.50881e+06	8.38741e+06	6.92749e+06	6.38522e+06	8.55857e+06	8.84523e+06	9.86946e+06	7.35456e+06
P21954	33	26	2410.65	48331	Isocitrate dehydrogenase [NADP], mitochondrial OS=Saccharomyces cerevisiae (strain ATCC 204508 / S288c) GN=IDP1 PE=1 SV=1	2.32052e+07	2.49015e+07	2.23517e+07	2.41027e+07	3.25873e+07	3.26933e+07	2.80741e+07	3.73005e+07	1.95279e+07	3.08033e+07	2.4591e+07	2.6706e+07	2.7087e+07	3.44932e+07	3.04004e+07	3.16278e+07
P34221	9	7	527.42	52098	Protein phosphatase 2C homolog 3 OS=Saccharomyces cerevisiae (strain ATCC 204508 / S288c) GN=PTC3 PE=1 SV=4	4.19897e+06	3.67828e+06	4.32746e+06	3.74902e+06	5.2917e+06	5.98872e+06	6.29488e+06	5.31583e+06	3.53356e+06	4.55005e+06	4.76101e+06	4.15395e+06	4.39854e+06	6.31842e+06	6.81649e+06	4.5074e+06
Q12123	4	3	200.11	40972	Inactive diphosphatase DCS2 OS=Saccharomyces cerevisiae (strain ATCC 204508 / S288c) GN=DCS2 PE=1 SV=3	367383	163746	206018	283843	1.64232e+06	830373	930217	660647	309164	202554	226657	314501	1.36512e+06	876088	1.0073e+06	560176
P46683	9	9	748.04	22456	Ankyrin repeat-containing protein YAR1 OS=Saccharomyces cerevisiae (strain ATCC 204508 / S288c) GN=YAR1 PE=1 SV=1	7.74836e+06	7.96665e+06	8.9939e+06	7.77717e+06	6.60108e+06	6.94174e+06	8.11203e+06	7.61665e+06	6.52048e+06	9.85479e+06	9.89496e+06	8.61717e+06	5.48691e+06	7.32392e+06	8.78421e+06	6.45831e+06
P27476	17	17	1222.98	44566	Nuclear localization sequence-binding protein OS=Saccharomyces cerevisiae (strain ATCC 204508 / S288c) GN=NSR1 PE=1 SV=1	3.43928e+07	3.56253e+07	4.89268e+07	3.27678e+07	1.81469e+07	2.09891e+07	1.95192e+07	2.44694e+07	2.89426e+07	4.40687e+07	5.38286e+07	3.6307e+07	1.50839e+07	2.21446e+07	2.11366e+07	2.07481e+07
P15180	30	29	2212.41	68428	Lysine--tRNA ligase, cytoplasmic OS=Saccharomyces cerevisiae (strain ATCC 204508 / S288c) GN=KRS1 PE=1 SV=2	7.20127e+07	6.55319e+07	6.55645e+07	6.49673e+07	4.4321e+07	5.50618e+07	4.93866e+07	3.78308e+07	6.06009e+07	8.10633e+07	7.21331e+07	7.19842e+07	3.68403e+07	5.80932e+07	5.34789e+07	3.20775e+07
P46669	8	8	425.26	36316	DNA-directed RNA polymerase I subunit RPA43 OS=Saccharomyces cerevisiae (strain ATCC 204508 / S288c) GN=RPA43 PE=1 SV=2	3.10653e+06	3.77465e+06	3.61218e+06	4.30057e+06	1.91953e+06	2.59002e+06	2.0834e+06	2.52021e+06	2.61424e+06	4.66927e+06	3.97407e+06	4.76506e+06	1.59554e+06	2.73261e+06	2.25604e+06	2.13694e+06
Q05946	13	13	966.54	91716	U3 small nucleolar RNA-associated protein 13 OS=Saccharomyces cerevisiae (strain ATCC 204508 / S288c) GN=UTP13 PE=1 SV=1	2.65614e+06	3.36511e+06	3.33239e+06	3.42598e+06	1.69582e+06	2.25752e+06	2.0703e+06	2.48551e+06	2.23522e+06	4.16266e+06	3.66624e+06	3.79601e+06	1.40959e+06	2.38181e+06	2.24185e+06	2.10751e+06
P14747	10	9	483.43	69055	Serine/threonine-protein phosphatase 2B catalytic subunit A2 OS=Saccharomyces cerevisiae (strain ATCC 204508 / S288c) GN=CMP2 PE=1 SV=2	498198	511453	493346	556544	935658	1.08465e+06	890022	806476	419248	632670	542772	616656	777733	1.14437e+06	963771	683828
P32802	6	6	351.44	76484	Transmembrane 9 superfamily member 1 OS=Saccharomyces cerevisiae (strain ATCC 204508 / S288c) GN=EMP70 PE=1 SV=2	3.68069e+06	3.33565e+06	3.47108e+06	3.20882e+06	2.71464e+06	2.88019e+06	2.43474e+06	3.33239e+06	3.09741e+06	4.12622e+06	3.81884e+06	3.5554e+06	2.25645e+06	3.03876e+06	2.63649e+06	2.8256e+06
Q03327	3	3	187.49	57678	Mitochondrial fusion and transport protein UGO1 OS=Saccharomyces cerevisiae (strain ATCC 204508 / S288c) GN=UGO1 PE=1 SV=3	190672	136098	289544	248428	808340	608186	615585	678870	160456	168353	318552	275260	671905	641670	666594	575628
P36121	7	7	569.36	32123	DNA-directed RNA polymerase III subunit RPC5 OS=Saccharomyces cerevisiae (strain ATCC 204508 / S288c) GN=RPC37 PE=1 SV=1	1.99125e+06	2.00041e+06	2.01914e+06	2.209e+06	1.04192e+06	1.33283e+06	1.20462e+06	1.80392e+06	1.6757e+06	2.47452e+06	2.22143e+06	2.44759e+06	866061	1.4062e+06	1.30444e+06	1.52958e+06
P38858	11	11	757.33	27995	6-phosphogluconolactonase 3 OS=Saccharomyces cerevisiae (strain ATCC 204508 / S288c) GN=SOL3 PE=1 SV=2	2.27555e+06	2.72843e+06	1.6901e+06	1.98963e+06	4.45653e+06	4.83413e+06	5.26551e+06	4.41481e+06	1.91494e+06	3.37508e+06	1.85943e+06	2.20453e+06	3.70434e+06	5.10027e+06	5.70182e+06	3.74341e+06
P38167	6	6	347.6	123933	Protein ECM21 OS=Saccharomyces cerevisiae (strain ATCC 204508 / S288c) GN=ECM21 PE=1 SV=2	212442	214868	216764	172374	405582	380989	410677	397003	178776	265793	238481	190992	337126	401964	444707	336627
P38840	16	16	1385.76	58604	Aromatic amino acid aminotransferase 2 OS=Saccharomyces cerevisiae (strain ATCC 204508 / S288c) GN=ARO9 PE=1 SV=3	3.44229e+06	4.27009e+06	4.24063e+06	4.62934e+06	6.88793e+06	6.18824e+06	5.73019e+06	5.15829e+06	2.89679e+06	5.28212e+06	4.66548e+06	5.12935e+06	5.72535e+06	6.52893e+06	6.20501e+06	4.37382e+06
P36037	12	12	727.73	79912	Protein DOA1 OS=Saccharomyces cerevisiae (strain ATCC 204508 / S288c) GN=DOA1 PE=1 SV=1	1.16512e+06	1.08371e+06	1.2383e+06	1.30632e+06	1.62605e+06	1.54799e+06	1.60783e+06	1.68309e+06	980488	1.34055e+06	1.36236e+06	1.44742e+06	1.35159e+06	1.63322e+06	1.74106e+06	1.42713e+06
Q05022	66	58	3798.32	193700	rRNA biogenesis protein RRP5 OS=Saccharomyces cerevisiae (strain ATCC 204508 / S288c) GN=RRP5 PE=1 SV=1	1.695e+07	1.54683e+07	1.66102e+07	1.57217e+07	1.27122e+07	1.36099e+07	1.43844e+07	1.57303e+07	1.42639e+07	1.91344e+07	1.82743e+07	1.74198e+07	1.05665e+07	1.43592e+07	1.55763e+07	1.3338e+07
P20485	5	5	365.31	66618	Choline kinase OS=Saccharomyces cerevisiae (strain ATCC 204508 / S288c) GN=CKI1 PE=1 SV=1	535768	486783	519437	537839	721589	708707	879101	994175	450865	602153	571477	595930	599796	747724	951946	842982
P43567	6	6	423.67	42223	Alanine--glyoxylate aminotransferase 1 OS=Saccharomyces cerevisiae (strain ATCC 204508 / S288c) GN=AGX1 PE=1 SV=1	395210	166661	139260	214238	2.56181e+06	1.60391e+06	1.57021e+06	1.55193e+06	332581	206161	153211	237378	2.12941e+06	1.69222e+06	1.70033e+06	1.31591e+06
P40991	20	20	1373.23	70168	25S rRNA (cytosine(2870)-C(5))-methyltransferase OS=Saccharomyces cerevisiae (strain ATCC 204508 / S288c) GN=NOP2 PE=1 SV=1	8.31364e+06	9.78855e+06	1.01619e+07	8.93475e+06	5.72913e+06	5.62738e+06	5.62348e+06	7.71719e+06	6.99618e+06	1.21085e+07	1.118e+07	9.89977e+06	4.76214e+06	5.9372e+06	6.08946e+06	6.54356e+06
Q12211	10	10	491.81	62389	tRNA pseudouridine synthase 1 OS=Saccharomyces cerevisiae (strain ATCC 204508 / S288c) GN=PUS1 PE=1 SV=1	2.57885e+06	3.11998e+06	3.04327e+06	2.55392e+06	1.34513e+06	1.69879e+06	1.58212e+06	2.28582e+06	2.17018e+06	3.85943e+06	3.34816e+06	2.82977e+06	1.1181e+06	1.79231e+06	1.71322e+06	1.93819e+06
P38013	14	14	1240.48	19274	Peroxiredoxin type-2 OS=Saccharomyces cerevisiae (strain ATCC 204508 / S288c) GN=AHP1 PE=1 SV=4	3.93689e+08	3.93816e+08	4.23084e+08	3.29975e+08	3.0269e+08	3.61581e+08	3.36687e+08	3.05382e+08	3.31301e+08	4.87152e+08	4.65471e+08	3.65615e+08	2.51601e+08	3.81488e+08	3.64586e+08	2.5894e+08
Q06672	4	4	218.29	23755	Pre-rRNA-processing protein TSR2 OS=Saccharomyces cerevisiae (strain ATCC 204508 / S288c) GN=TSR2 PE=1 SV=2	1.59868e+06	1.68533e+06	1.5797e+06	1.50659e+06	1.23702e+06	1.27619e+06	1.27896e+06	1.26439e+06	1.34534e+06	2.08476e+06	1.73797e+06	1.66931e+06	1.02823e+06	1.34645e+06	1.38494e+06	1.0721e+06
P28817	5	5	356.92	56709	3-hydroxyisobutyryl-CoA hydrolase, mitochondrial OS=Saccharomyces cerevisiae (strain ATCC 204508 / S288c) GN=EHD3 PE=1 SV=2	921949	641714	555583	682953	1.62306e+06	1.66731e+06	1.4671e+06	1.17638e+06	775848	793803	611244	756718	1.34911e+06	1.75911e+06	1.58867e+06	997479
P41939	21	13	1380.93	46590	Isocitrate dehydrogenase [NADP] cytoplasmic OS=Saccharomyces cerevisiae (strain ATCC 204508 / S288c) GN=IDP2 PE=1 SV=2	220893	282819	238953	250044	4.32831e+06	3.90783e+06	3.26278e+06	3.48756e+06	185888	349849	262892	277051	3.59776e+06	4.12298e+06	3.53314e+06	2.95717e+06
Q04067	14	14	1309.38	30711	Eukaryotic translation initiation factor 3 subunit G OS=Saccharomyces cerevisiae (strain ATCC 204508 / S288c) GN=TIF35 PE=1 SV=1	2.40608e+07	2.33511e+07	2.27656e+07	2.22691e+07	2.20463e+07	2.36588e+07	2.13101e+07	2.10934e+07	2.02479e+07	2.88854e+07	2.50464e+07	2.46743e+07	1.83252e+07	2.49613e+07	2.30759e+07	1.78855e+07
P39976	20	19	1473.23	55532	D-lactate dehydrogenase [cytochrome] 3 OS=Saccharomyces cerevisiae (strain ATCC 204508 / S288c) GN=DLD3 PE=1 SV=1	1.4441e+07	1.4055e+07	1.03198e+07	1.00101e+07	5.85333e+06	7.1767e+06	6.8897e+06	7.80998e+06	1.21526e+07	1.73861e+07	1.13537e+07	1.10912e+07	4.86537e+06	7.57181e+06	7.4606e+06	6.62224e+06
P32487;P38971	3	3	116.79	68388	Lysine-specific permease OS=Saccharomyces cerevisiae (strain ATCC 204508 / S288c) GN=LYP1 PE=1 SV=2	1.08534e+06	984805	764605	1.05359e+06	188352	248995	146280	438742	913343	1.21821e+06	841207	1.16738e+06	156561	262703	158401	372018
P41818	5	5	268.89	26690	Protein GLC8 OS=Saccharomyces cerevisiae (strain ATCC 204508 / S288c) GN=GLC8 PE=1 SV=1	2.76467e+06	3.12593e+06	3.18519e+06	3.62445e+06	5.35003e+06	4.70871e+06	4.93986e+06	4.69106e+06	2.32655e+06	3.86679e+06	3.5043e+06	4.01592e+06	4.44702e+06	4.96794e+06	5.34918e+06	3.97765e+06
Q04867	3	2	138.17	36058	Putative methyltransferase YMR310C OS=Saccharomyces cerevisiae (strain ATCC 204508 / S288c) GN=YMR310C PE=1 SV=1	265483	280114	254475	254623	140966	159395	152557	192719	223412	346502	279970	282124	117173	168171	165198	163410
P38961	7	7	305	46241	25S rRNA (adenine(645)-N(1))-methyltransferase OS=Saccharomyces cerevisiae (strain ATCC 204508 / S288c) GN=RRP8 PE=1 SV=2	1.65987e+06	1.78265e+06	2.11767e+06	1.81065e+06	976840	1.17451e+06	1.08828e+06	1.34325e+06	1.39683e+06	2.20514e+06	2.32983e+06	2.00622e+06	811964	1.23917e+06	1.17846e+06	1.13897e+06
P36521	4	4	283.03	28554	54S ribosomal protein L11, mitochondrial OS=Saccharomyces cerevisiae (strain ATCC 204508 / S288c) GN=MRPL11 PE=1 SV=2	299606	264048	404371	345782	585452	662389	1.02215e+06	772134	252128	326628	444883	383129	486637	698857	1.10685e+06	654708
P25623	12	12	737.6	96250	Suppressor of yeast profilin deletion OS=Saccharomyces cerevisiae (strain ATCC 204508 / S288c) GN=SYP1 PE=1 SV=3	3.83775e+06	4.536e+06	4.41497e+06	3.93061e+06	6.29901e+06	5.80637e+06	5.59276e+06	5.67027e+06	3.22959e+06	5.61105e+06	4.85729e+06	4.35515e+06	5.23584e+06	6.12604e+06	6.05619e+06	4.80794e+06
P38931	2	2	58.53	160756	Mediator of RNA polymerase II transcription subunit 13 OS=Saccharomyces cerevisiae (strain ATCC 204508 / S288c) GN=SSN2 PE=1 SV=2	7153.08	9339.65	18417.1	14116.1	15370.6	26669.4	16619.9	17861.6	6019.54	11553.2	20262.2	15640.8	12776.3	28137.7	17997.1	15145.2
P40098	4	4	197.29	27681	Uncharacterized mitochondrial membrane protein FMP10 OS=Saccharomyces cerevisiae (strain ATCC 204508 / S288c) GN=FMP10 PE=1 SV=1	406634	412304	360272	340171	935778	819178	930792	670829	342195	510022	396365	376912	777833	864278	1.00792e+06	568810
P39533	14	14	972.82	87042	Homocitrate dehydratase, mitochondrial OS=Saccharomyces cerevisiae (strain ATCC 204508 / S288c) GN=ACO2 PE=1 SV=1	6.91588e+06	6.64394e+06	6.74603e+06	8.209e+06	4.69329e+06	5.57606e+06	4.92668e+06	5.14648e+06	5.81992e+06	8.21859e+06	7.42189e+06	9.09564e+06	3.90113e+06	5.88305e+06	5.33491e+06	4.36381e+06
P43582	3	3	284.48	22641	WW domain-containing protein WWM1 OS=Saccharomyces cerevisiae (strain ATCC 204508 / S288c) GN=WWM1 PE=1 SV=1	6.10183e+06	5.8742e+06	5.53639e+06	7.10719e+06	8.6265e+06	9.22335e+06	8.84957e+06	9.08188e+06	5.13487e+06	7.26642e+06	6.09105e+06	7.87482e+06	7.17048e+06	9.73114e+06	9.58286e+06	7.70071e+06
P39744	17	16	833.1	81835	Nucleolar complex protein 2 OS=Saccharomyces cerevisiae (strain ATCC 204508 / S288c) GN=NOC2 PE=1 SV=2	3.82482e+06	4.01538e+06	3.58713e+06	3.10169e+06	2.39065e+06	2.84432e+06	2.88082e+06	2.70675e+06	3.2187e+06	4.96705e+06	3.9465e+06	3.4367e+06	1.98715e+06	3.00091e+06	3.11954e+06	2.2951e+06
P10823	6	6	487.13	50644	Guanine nucleotide-binding protein alpha-2 subunit OS=Saccharomyces cerevisiae (strain ATCC 204508 / S288c) GN=GPA2 PE=1 SV=2	178931	248462	166112	234947	500834	460611	377289	599797	150576	307348	182754	260324	416301	485969	408552	508580
P41814	2	2	143.23	54583	tRNA (adenine(58)-N(1))-methyltransferase non-catalytic subunit TRM6 OS=Saccharomyces cerevisiae (strain ATCC 204508 / S288c) GN=GCD10 PE=1 SV=1	1.54221e+06	1.78717e+06	1.98793e+06	1.90064e+06	654351	937284	896398	1.00631e+06	1.29781e+06	2.21073e+06	2.18709e+06	2.10593e+06	543907	988886	970675	853271
Q3E841	6	6	405.07	10775	Uncharacterized protein YNR034W-A OS=Saccharomyces cerevisiae (strain ATCC 204508 / S288c) GN=YNR034W-A PE=1 SV=1	2.16022e+06	2.49379e+06	2.86164e+06	3.81818e+06	1.15963e+07	6.82214e+06	9.10903e+06	4.38871e+06	1.81789e+06	3.08483e+06	3.14834e+06	4.23057e+06	9.63902e+06	7.19772e+06	9.86383e+06	3.72128e+06
P42846	13	13	838.02	68612	Protein KRI1 OS=Saccharomyces cerevisiae (strain ATCC 204508 / S288c) GN=KRI1 PE=1 SV=1	5.18679e+06	5.05165e+06	4.49154e+06	4.93558e+06	3.26303e+06	3.97469e+06	4.01972e+06	4.36307e+06	4.36484e+06	6.24891e+06	4.94153e+06	5.46866e+06	2.71228e+06	4.19351e+06	4.35281e+06	3.69954e+06
P53327	6	6	306.58	225904	Antiviral helicase SLH1 OS=Saccharomyces cerevisiae (strain ATCC 204508 / S288c) GN=SLH1 PE=1 SV=2	419959	476121	376167	333619	678245	545183	626998	643372	353408	588964	413853	369652	563767	575198	678953	545528
P43585	34	32	2185.25	95439	Vacuolar transporter chaperone 2 OS=Saccharomyces cerevisiae (strain ATCC 204508 / S288c) GN=VTC2 PE=1 SV=1	4.11873e+06	4.16452e+06	4.08371e+06	4.74756e+06	5.84435e+06	5.3472e+06	6.17501e+06	6.47939e+06	3.46603e+06	5.15154e+06	4.49284e+06	5.26034e+06	4.85791e+06	5.64159e+06	6.68669e+06	5.49401e+06
P07267	15	15	1450.04	44699	Saccharopepsin OS=Saccharomyces cerevisiae (strain ATCC 204508 / S288c) GN=PEP4 PE=1 SV=1	1.99042e+07	2.92535e+07	2.39535e+07	2.3903e+07	4.26107e+07	3.4857e+07	3.79506e+07	2.92435e+07	1.675e+07	3.61867e+07	2.63533e+07	2.64847e+07	3.54186e+07	3.67761e+07	4.10953e+07	2.47961e+07
Q06177	2	2	126.63	9828	Translation machinery-associated protein 10 OS=Saccharomyces cerevisiae (strain ATCC 204508 / S288c) GN=TMA10 PE=1 SV=3	354623	237776	285775	93113.7	5.40188e+06	6.07536e+06	6.50552e+06	1.57812e+06	298426	294131	314405	103171	4.49012e+06	6.40984e+06	7.04458e+06	1.33812e+06
Q03786	2	2	77.4	22332	Probable gluconokinase OS=Saccharomyces cerevisiae (strain ATCC 204508 / S288c) GN=YDR248C PE=1 SV=1	55687.1	81798.4	73460.3	81473.8	232485	216807	248737	98033.7	46862.4	101185	80819.9	90273.7	193245	228744	269348	83124.8
Q01852	12	10	740.17	48881	Mitochondrial import inner membrane translocase subunit TIM44 OS=Saccharomyces cerevisiae (strain ATCC 204508 / S288c) GN=TIM44 PE=1 SV=1	2.72914e+06	2.73455e+06	3.07984e+06	3.48788e+06	4.27816e+06	4.4829e+06	4.50594e+06	5.27754e+06	2.29666e+06	3.38265e+06	3.38839e+06	3.8646e+06	3.55607e+06	4.72971e+06	4.87931e+06	4.47494e+06
P53163	5	5	483.56	20637	54S ribosomal protein L12, mitochondrial OS=Saccharomyces cerevisiae (strain ATCC 204508 / S288c) GN=MNP1 PE=1 SV=1	4.87153e+06	6.44035e+06	7.76e+06	7.46102e+06	1.39048e+07	1.84851e+07	1.92175e+07	1.69161e+07	4.09954e+06	7.96675e+06	8.53744e+06	8.26687e+06	1.15579e+07	1.95027e+07	2.08099e+07	1.43435e+07
P00175	16	13	1041.97	65954	Cytochrome b2, mitochondrial OS=Saccharomyces cerevisiae (strain ATCC 204508 / S288c) GN=CYB2 PE=1 SV=1	1.20291e+06	534008	392687	904096	7.91279e+06	3.2805e+06	4.09736e+06	2.00414e+06	1.01229e+06	660571	432029	1.00175e+06	6.57723e+06	3.46111e+06	4.43687e+06	1.69935e+06
P32445	5	5	478.26	15377	Single-stranded DNA-binding protein RIM1, mitochondrial OS=Saccharomyces cerevisiae (strain ATCC 204508 / S288c) GN=RIM1 PE=1 SV=1	1.08351e+07	9.52481e+06	9.62442e+06	9.85516e+06	1.86113e+07	1.65184e+07	1.66492e+07	1.80358e+07	9.11804e+06	1.17822e+07	1.05886e+07	1.09196e+07	1.547e+07	1.74278e+07	1.80288e+07	1.52929e+07
P39925	6	3	290.37	84719	Mitochondrial respiratory chain complexes assembly protein AFG3 OS=Saccharomyces cerevisiae (strain ATCC 204508 / S288c) GN=AFG3 PE=1 SV=1	886215	522512	604556	562037	1.08088e+06	1.01908e+06	962269	985065	745777	646350	665124	622741	898441	1.07519e+06	1.04201e+06	835257
P40079	10	10	481.1	40826	U3 small nucleolar ribonucleoprotein protein LCP5 OS=Saccharomyces cerevisiae (strain ATCC 204508 / S288c) GN=LCP5 PE=1 SV=1	3.48414e+06	4.40938e+06	4.4589e+06	4.09337e+06	2.41709e+06	2.97051e+06	2.84687e+06	2.67711e+06	2.93201e+06	5.45443e+06	4.90562e+06	4.53549e+06	2.00912e+06	3.13405e+06	3.08277e+06	2.26998e+06
P06244	4	2	201.31	46161	cAMP-dependent protein kinase type 1 OS=Saccharomyces cerevisiae (strain ATCC 204508 / S288c) GN=TPK1 PE=1 SV=3	491615	449442	656908	428005	1.98118e+06	1.54187e+06	1.53243e+06	703340	413709	555962	722721	474233	1.64679e+06	1.62676e+06	1.65941e+06	596376
Q03771	8	8	700.91	43144	UPF0661 TPR repeat-containing protein YDR161W OS=Saccharomyces cerevisiae (strain ATCC 204508 / S288c) GN=YDR161W PE=1 SV=1	2.74398e+06	3.36851e+06	3.67259e+06	3.29464e+06	1.40691e+06	1.80745e+06	1.86469e+06	2.32999e+06	2.30914e+06	4.16686e+06	4.04053e+06	3.65049e+06	1.16944e+06	1.90695e+06	2.0192e+06	1.97565e+06
Q03532	15	15	940.65	56967	ATP-dependent RNA helicase HAS1 OS=Saccharomyces cerevisiae (strain ATCC 204508 / S288c) GN=HAS1 PE=1 SV=1	5.74469e+06	6.31742e+06	6.45855e+06	6.46133e+06	2.65096e+06	3.40285e+06	3.16146e+06	4.06264e+06	4.83433e+06	7.81468e+06	7.1056e+06	7.15921e+06	2.20352e+06	3.5902e+06	3.42343e+06	3.44479e+06
P40043	3	3	334.31	19091	Respiratory growth induced protein 1 OS=Saccharomyces cerevisiae (strain ATCC 204508 / S288c) GN=RGI1 PE=1 SV=1	7.31051e+06	8.04083e+06	9.04527e+06	7.33734e+06	4.43582e+07	3.48874e+07	4.81426e+07	1.46648e+07	6.15202e+06	9.94654e+06	9.95147e+06	8.12983e+06	3.68712e+07	3.68081e+07	5.21318e+07	1.24346e+07
P12866	3	3	109.41	146155	Alpha-factor-transporting ATPase OS=Saccharomyces cerevisiae (strain ATCC 204508 / S288c) GN=STE6 PE=1 SV=1	142396	185323	139130	151643	45341.6	25535.2	46592.9	33353.1	119831	229246	153069	168022	37688.6	26941	50453.7	28280.8
P40433	3	2	175.86	93587	6-phosphofructo-2-kinase 1 OS=Saccharomyces cerevisiae (strain ATCC 204508 / S288c) GN=PFK26 PE=1 SV=1	29751.9	83686.6	69988.7	77104.1	461969	279533	293845	340573	25037.1	103521	77000.5	85431.9	383996	294923	318193	288779
Q06338	3	3	244.23	32755	Protein BCP1 OS=Saccharomyces cerevisiae (strain ATCC 204508 / S288c) GN=BCP1 PE=1 SV=1	2.58514e+06	2.91961e+06	2.55195e+06	2.51922e+06	1.37499e+06	1.79581e+06	1.6149e+06	1.94601e+06	2.17547e+06	3.61157e+06	2.80761e+06	2.79132e+06	1.14291e+06	1.89467e+06	1.74872e+06	1.65006e+06
P20484	10	9	516.11	54095	Protein MAK11 OS=Saccharomyces cerevisiae (strain ATCC 204508 / S288c) GN=MAK11 PE=1 SV=1	2.80057e+06	3.62527e+06	3.5705e+06	2.28194e+06	1.84117e+06	2.10548e+06	1.89605e+06	1.73647e+06	2.35677e+06	4.48448e+06	3.92821e+06	2.52841e+06	1.53041e+06	2.2214e+06	2.05316e+06	1.47239e+06
P11075	35	34	2510.82	228227	Protein transport protein SEC7 OS=Saccharomyces cerevisiae (strain ATCC 204508 / S288c) GN=SEC7 PE=1 SV=2	3.16615e+06	2.6566e+06	2.65114e+06	2.98736e+06	2.02837e+07	1.40669e+07	1.37375e+07	1.18566e+07	2.66441e+06	3.28623e+06	2.91675e+06	3.31002e+06	1.68601e+07	1.48414e+07	1.48758e+07	1.00535e+07
P35178	3	3	217.27	33239	Ribosomal RNA-processing protein 1 OS=Saccharomyces cerevisiae (strain ATCC 204508 / S288c) GN=RRP1 PE=1 SV=2	995072	1.1388e+06	1.27906e+06	985600	508565	672383	596692	705081	837383	1.40871e+06	1.4072e+06	1.09205e+06	422727	709400	646135	597853
P53276	12	12	982.75	80768	U3 small nucleolar RNA-associated protein 8 OS=Saccharomyces cerevisiae (strain ATCC 204508 / S288c) GN=UTP8 PE=1 SV=1	4.31113e+06	4.77147e+06	4.83647e+06	4.44461e+06	2.53983e+06	2.74792e+06	2.78935e+06	3.33603e+06	3.62794e+06	5.90233e+06	5.32101e+06	4.92467e+06	2.11114e+06	2.89921e+06	3.02048e+06	2.82869e+06
P34164	2	2	55.8	46604	SNF1 protein kinase subunit beta-2 OS=Saccharomyces cerevisiae (strain ATCC 204508 / S288c) GN=SIP2 PE=1 SV=3	85485.8	86151.7	85634.6	50307	544293	344582	348176	179806	71938.8	106570	94214	55740.6	452424	363552	377026	152461
P25382	4	4	143.69	57674	Ribosome assembly protein 4 OS=Saccharomyces cerevisiae (strain ATCC 204508 / S288c) GN=RSA4 PE=1 SV=3	2.36012e+06	2.52577e+06	2.67879e+06	2.42429e+06	1.24901e+06	1.82037e+06	1.47546e+06	2.02207e+06	1.98611e+06	3.12439e+06	2.94716e+06	2.68613e+06	1.0382e+06	1.92059e+06	1.59773e+06	1.71456e+06
Q12387	7	6	459.89	93548	N-terminal acetyltransferase B complex subunit MDM20 OS=Saccharomyces cerevisiae (strain ATCC 204508 / S288c) GN=MDM20 PE=1 SV=1	866905	1.02891e+06	953731	1.05904e+06	621554	682252	733291	718406	729527	1.27277e+06	1.04928e+06	1.17343e+06	516645	719813	794053	609151
P25635	16	16	711.81	104375	Periodic tryptophan protein 2 OS=Saccharomyces cerevisiae (strain ATCC 204508 / S288c) GN=PWP2 PE=1 SV=2	1.4911e+06	1.33971e+06	1.69999e+06	1.45824e+06	1.18893e+06	1.00651e+06	1.1163e+06	1.18878e+06	1.2548e+06	1.65723e+06	1.8703e+06	1.61574e+06	988255	1.06192e+06	1.20879e+06	1.00799e+06
P36008	22	18	1856.84	46605	Elongation factor 1-gamma 2 OS=Saccharomyces cerevisiae (strain ATCC 204508 / S288c) GN=TEF4 PE=1 SV=1	1.45534e+08	1.45374e+08	1.53614e+08	1.73903e+08	9.32887e+07	1.16473e+08	1.06372e+08	1.29263e+08	1.22471e+08	1.79828e+08	1.69004e+08	1.92686e+08	7.7543e+07	1.22885e+08	1.15186e+08	1.09605e+08
P53941	5	5	226.11	33576	U3 small nucleolar ribonucleoprotein protein IMP4 OS=Saccharomyces cerevisiae (strain ATCC 204508 / S288c) GN=IMP4 PE=1 SV=1	869988	783148	835707	875135	664399	533793	460729	706496	732121	968758	919433	969656	552258	563180	498906	599052
P53883	9	9	612	45809	Nucleolar protein 13 OS=Saccharomyces cerevisiae (strain ATCC 204508 / S288c) GN=NOP13 PE=1 SV=2	2.73763e+06	2.55706e+06	2.92076e+06	2.60667e+06	1.06921e+06	1.57142e+06	1.44827e+06	1.93958e+06	2.3038e+06	3.1631e+06	3.21337e+06	2.88821e+06	888740	1.65794e+06	1.56828e+06	1.64461e+06
P53326	9	8	536.18	81823	Uncharacterized protein YGR266W OS=Saccharomyces cerevisiae (strain ATCC 204508 / S288c) GN=YGR266W PE=1 SV=1	2.11849e+06	2.13457e+06	2.12728e+06	1.86804e+06	2.89249e+06	2.97933e+06	2.8083e+06	2.24661e+06	1.78277e+06	2.64047e+06	2.34041e+06	2.06981e+06	2.40428e+06	3.14336e+06	3.041e+06	1.90494e+06
P32787	7	7	517.15	30471	Mitochondrial genome maintenance protein MGM101 OS=Saccharomyces cerevisiae (strain ATCC 204508 / S288c) GN=MGM101 PE=1 SV=1	2.60064e+06	2.33964e+06	2.58368e+06	2.84241e+06	4.01563e+06	4.13773e+06	3.94662e+06	4.43577e+06	2.18851e+06	2.89415e+06	2.84253e+06	3.14942e+06	3.33785e+06	4.36553e+06	4.27365e+06	3.76118e+06
P32472	2	2	120.93	14592	Peptidyl-prolyl cis-trans isomerase FPR2 OS=Saccharomyces cerevisiae (strain ATCC 204508 / S288c) GN=FPR2 PE=1 SV=1	2.06159e+06	1.92256e+06	1.83808e+06	2.14427e+06	3.08285e+06	3.10633e+06	2.94133e+06	3.25582e+06	1.73489e+06	2.37821e+06	2.02223e+06	2.37586e+06	2.56251e+06	3.27735e+06	3.18506e+06	2.76068e+06
P28007	7	6	598.38	21638	H/ACA ribonucleoprotein complex subunit 1 OS=Saccharomyces cerevisiae (strain ATCC 204508 / S288c) GN=GAR1 PE=1 SV=1	3.11516e+07	3.60962e+07	3.58857e+07	3.31332e+07	2.20057e+07	2.55507e+07	2.67366e+07	1.7639e+07	2.62151e+07	4.46511e+07	3.94809e+07	3.67119e+07	1.82914e+07	2.69574e+07	2.8952e+07	1.49565e+07
P35184	7	7	387.98	47764	Ribosome assembly protein SQT1 OS=Saccharomyces cerevisiae (strain ATCC 204508 / S288c) GN=SQT1 PE=1 SV=2	5.80322e+06	5.74942e+06	6.45053e+06	6.17775e+06	4.12994e+06	4.54431e+06	4.25053e+06	5.50407e+06	4.88359e+06	7.11206e+06	7.09677e+06	6.845e+06	3.43287e+06	4.79449e+06	4.60273e+06	4.66701e+06
Q02046	5	4	302.51	36559	Methylenetetrahydrofolate dehydrogenase [NAD(+)] OS=Saccharomyces cerevisiae (strain ATCC 204508 / S288c) GN=MTD1 PE=1 SV=1	5.74637e+06	7.4132e+06	5.73498e+06	6.67761e+06	4.18946e+06	4.07236e+06	4.16636e+06	3.79623e+06	4.83574e+06	9.17017e+06	6.30954e+06	7.39884e+06	3.48234e+06	4.29657e+06	4.51159e+06	3.21891e+06
Q01532	8	7	681.33	55619	Cysteine proteinase 1, mitochondrial OS=Saccharomyces cerevisiae (strain ATCC 204508 / S288c) GN=LAP3 PE=1 SV=3	5.90158e+06	6.99445e+06	6.65652e+06	6.35657e+06	1.20102e+07	9.13393e+06	1.00865e+07	9.92456e+06	4.96636e+06	8.65217e+06	7.32341e+06	7.04313e+06	9.98305e+06	9.63679e+06	1.09223e+07	8.41524e+06
P40553	5	5	356.62	24219	Peroxiredoxin DOT5 OS=Saccharomyces cerevisiae (strain ATCC 204508 / S288c) GN=DOT5 PE=1 SV=1	1.39014e+06	1.38269e+06	1.42896e+06	1.60993e+06	2.69313e+06	2.28312e+06	2.3649e+06	2.46553e+06	1.16985e+06	1.71039e+06	1.57212e+06	1.78382e+06	2.23857e+06	2.40881e+06	2.56086e+06	2.09058e+06
P22855	4	4	195.34	125390	Alpha-mannosidase OS=Saccharomyces cerevisiae (strain ATCC 204508 / S288c) GN=AMS1 PE=1 SV=2	23984.4	69126.1	169526	51931.9	445360	315910	345654	234616	20183.6	85509.3	186510	57541	370190	333303	374296	198935
Q12109	19	19	1519.61	49661	Tryptophan--tRNA ligase, cytoplasmic OS=Saccharomyces cerevisiae (strain ATCC 204508 / S288c) GN=WRS1 PE=1 SV=1	1.36607e+07	1.32162e+07	1.30276e+07	1.43495e+07	8.69096e+06	1.04298e+07	9.82732e+06	1.05574e+07	1.14959e+07	1.63486e+07	1.43327e+07	1.58994e+07	7.22406e+06	1.1004e+07	1.06416e+07	8.95188e+06
P47120	23	22	1843.79	36313	Deoxyhypusine hydroxylase OS=Saccharomyces cerevisiae (strain ATCC 204508 / S288c) GN=LIA1 PE=1 SV=1	2.4302e+07	2.46345e+07	2.56994e+07	2.73306e+07	1.9439e+07	2.15445e+07	2.2119e+07	2.58168e+07	2.04508e+07	3.0473e+07	2.82742e+07	3.02825e+07	1.6158e+07	2.27307e+07	2.39519e+07	2.18906e+07
P34250	3	2	141.07	125803	Eisosome protein SEG2 OS=Saccharomyces cerevisiae (strain ATCC 204508 / S288c) GN=SEG2 PE=1 SV=1	48998.5	73435.9	49608.5	86992.1	114125	137624	105880	147077	41233.8	90840.6	54578.6	96387.9	94862.3	145201	114654	124710
P33442	25	5	2377.25	28783	40S ribosomal protein S1-A OS=Saccharomyces cerevisiae (strain ATCC 204508 / S288c) GN=RPS1A PE=1 SV=2	1.1733e+08	1.20677e+08	1.30304e+08	1.31694e+08	8.82565e+07	1.00155e+08	9.72815e+07	1.05791e+08	9.87366e+07	1.49278e+08	1.43359e+08	1.45918e+08	7.33601e+07	1.05669e+08	1.05342e+08	8.97022e+07
P53731	13	13	974.93	39713	Actin-related protein 2/3 complex subunit 2 OS=Saccharomyces cerevisiae (strain ATCC 204508 / S288c) GN=ARC35 PE=1 SV=1	7.56126e+06	7.16927e+06	6.50895e+06	6.99241e+06	9.64441e+06	9.56546e+06	9.16405e+06	1.04915e+07	6.36303e+06	8.86842e+06	7.16105e+06	7.74765e+06	8.01658e+06	1.00921e+07	9.92341e+06	8.89594e+06
P53251	5	5	382.46	24055	Ribosome biogenesis protein SLX9 OS=Saccharomyces cerevisiae (strain ATCC 204508 / S288c) GN=SLX9 PE=1 SV=1	1.31062e+06	1.50834e+06	1.66887e+06	1.62382e+06	710528	1.12592e+06	953271	1.26068e+06	1.10293e+06	1.86582e+06	1.83607e+06	1.7992e+06	590601	1.18791e+06	1.03226e+06	1.06896e+06
Q07451	12	11	954.69	23002	Endoplasmic reticulum transmembrane protein 3 OS=Saccharomyces cerevisiae (strain ATCC 204508 / S288c) GN=YET3 PE=1 SV=1	2.08959e+06	2.25609e+06	2.36484e+06	2.20903e+06	3.25189e+06	3.26631e+06	2.70972e+06	3.57264e+06	1.75845e+06	2.79079e+06	2.60176e+06	2.44762e+06	2.70302e+06	3.44613e+06	2.93425e+06	3.02932e+06
P39715	2	2	114.35	23877	Shuttling pre-60S factor ECM1 OS=Saccharomyces cerevisiae (strain ATCC 204508 / S288c) GN=ECM1 PE=1 SV=2	5.31801e+06	4.57213e+06	5.13932e+06	4.46922e+06	2.56888e+06	3.46826e+06	2.82594e+06	3.64447e+06	4.47527e+06	5.65574e+06	5.6542e+06	4.95193e+06	2.13529e+06	3.6592e+06	3.0601e+06	3.09022e+06
P42945	26	26	1506.78	200869	U3 small nucleolar RNA-associated protein 10 OS=Saccharomyces cerevisiae (strain ATCC 204508 / S288c) GN=UTP10 PE=1 SV=1	4.30576e+06	3.97143e+06	4.76508e+06	4.24672e+06	2.38632e+06	2.88876e+06	2.62347e+06	3.55904e+06	3.62342e+06	4.91268e+06	5.24247e+06	4.7054e+06	1.98354e+06	3.0478e+06	2.84085e+06	3.01779e+06
P20434	7	7	459.63	25234	DNA-directed RNA polymerases I, II, and III subunit RPABC1 OS=Saccharomyces cerevisiae (strain ATCC 204508 / S288c) GN=RPB5 PE=1 SV=1	1.02949e+07	1.16621e+07	1.23063e+07	1.21626e+07	7.88949e+06	8.58907e+06	1.01026e+07	8.04859e+06	8.66347e+06	1.44261e+07	1.35392e+07	1.34763e+07	6.55786e+06	9.06194e+06	1.09397e+07	6.82456e+06
Q03048	8	8	929.63	15948	Cofilin OS=Saccharomyces cerevisiae (strain ATCC 204508 / S288c) GN=COF1 PE=1 SV=1	6.52363e+07	7.61246e+07	7.11826e+07	7.19279e+07	8.5757e+07	8.4457e+07	8.49263e+07	8.8083e+07	5.48983e+07	9.41665e+07	7.83141e+07	7.96967e+07	7.12825e+07	8.91067e+07	9.19635e+07	7.46874e+07
P33313	6	6	299.86	44370	Hsp70/Hsp90 co-chaperone CNS1 OS=Saccharomyces cerevisiae (strain ATCC 204508 / S288c) GN=CNS1 PE=1 SV=1	1.24687e+06	1.52893e+06	1.54531e+06	1.62699e+06	741135	853364	898807	1.07283e+06	1.04927e+06	1.89129e+06	1.70012e+06	1.80272e+06	616043	900345	973284	909673
P80235	2	2	120.83	78344	Putative mitochondrial carnitine O-acetyltransferase OS=Saccharomyces cerevisiae (strain ATCC 204508 / S288c) GN=YAT1 PE=1 SV=2	73371	146887	84207.1	122528	600010	485549	335477	334515	61743.9	181700	92643.4	135762	498737	512281	363276	283642
Q04500	14	14	981.4	102961	U3 small nucleolar RNA-associated protein 14 OS=Saccharomyces cerevisiae (strain ATCC 204508 / S288c) GN=UTP14 PE=1 SV=1	2.26368e+06	2.51478e+06	2.3169e+06	2.07569e+06	1.26003e+06	1.51589e+06	1.45178e+06	1.89151e+06	1.90496e+06	3.1108e+06	2.54902e+06	2.29989e+06	1.04736e+06	1.59935e+06	1.57207e+06	1.60385e+06
P47176	17	16	1316.13	41940	Branched-chain-amino-acid aminotransferase, cytosolic OS=Saccharomyces cerevisiae (strain ATCC 204508 / S288c) GN=BAT2 PE=1 SV=1	2.4413e+07	2.81107e+07	2.12255e+07	2.40775e+07	3.60223e+07	3.04679e+07	3.12279e+07	2.55308e+07	2.05443e+07	3.4773e+07	2.3352e+07	2.6678e+07	2.99423e+07	3.21453e+07	3.38155e+07	2.16481e+07
P53154	3	2	158.64	65640	Glycerol uptake protein 1 OS=Saccharomyces cerevisiae (strain ATCC 204508 / S288c) GN=GUP1 PE=1 SV=1	261333	360865	294439	270984	508106	492449	469472	404861	219920	446391	323937	300252	422345	519561	508373	343290
Q07653	10	10	583.82	113548	Protein HBT1 OS=Saccharomyces cerevisiae (strain ATCC 204508 / S288c) GN=HBT1 PE=1 SV=1	51209.4	168228	50339.2	94310.6	251418	105201	124475	123104	43094.3	208098	55382.4	104497	208982	110993	134789	104383
P32386;P38735	19	19	1177.34	189898	ATP-dependent bile acid permease OS=Saccharomyces cerevisiae (strain ATCC 204508 / S288c) GN=YBT1 PE=1 SV=2	3.69058e+06	4.04688e+06	3.9519e+06	3.72132e+06	2.9091e+06	2.97944e+06	2.52935e+06	3.15583e+06	3.10573e+06	5.006e+06	4.34782e+06	4.12325e+06	2.41808e+06	3.14347e+06	2.73894e+06	2.67589e+06
Q04697	10	10	685.42	45955	Glucose-signaling factor 2 OS=Saccharomyces cerevisiae (strain ATCC 204508 / S288c) GN=GSF2 PE=1 SV=1	9.22418e+06	8.50156e+06	1.02698e+07	9.73669e+06	1.31279e+07	1.22827e+07	1.17665e+07	1.32879e+07	7.76242e+06	1.05165e+07	1.12986e+07	1.07883e+07	1.09121e+07	1.2959e+07	1.27415e+07	1.12671e+07
P10963	18	18	1540.81	61515	Phosphoenolpyruvate carboxykinase [ATP] OS=Saccharomyces cerevisiae (strain ATCC 204508 / S288c) GN=PCK1 PE=1 SV=2	677774	986183	825365	1.21533e+06	1.13165e+07	1.0951e+07	1.03907e+07	8.87051e+06	570368	1.21991e+06	908054	1.3466e+06	9.40649e+06	1.15539e+07	1.12517e+07	7.52149e+06
P14063	2	2	99.37	15568	54S ribosomal protein L31, mitochondrial OS=Saccharomyces cerevisiae (strain ATCC 204508 / S288c) GN=MRPL31 PE=1 SV=1	269416	572131	268867	444427	1.85536e+06	1.40602e+06	1.36645e+06	1.34927e+06	226722	707728	295803	492429	1.5422e+06	1.48343e+06	1.47968e+06	1.14407e+06
P32529	3	3	284.63	14108	DNA-directed RNA polymerase I subunit RPA12 OS=Saccharomyces cerevisiae (strain ATCC 204508 / S288c) GN=RPA12 PE=1 SV=1	5.43764e+06	6.29699e+06	6.35371e+06	5.64067e+06	3.49194e+06	4.71958e+06	4.2313e+06	5.03104e+06	4.57594e+06	7.78941e+06	6.99026e+06	6.2499e+06	2.90255e+06	4.97942e+06	4.58192e+06	4.26592e+06
Q04409	22	16	1657.78	56399	Putative glucokinase-2 OS=Saccharomyces cerevisiae (strain ATCC 204508 / S288c) GN=EMI2 PE=1 SV=1	1.43488e+07	1.09817e+07	1.18993e+07	1.19689e+07	3.35567e+07	2.66188e+07	2.69569e+07	2.867e+07	1.2075e+07	1.35845e+07	1.30914e+07	1.32616e+07	2.78929e+07	2.80843e+07	2.91906e+07	2.43099e+07
P05750	22	21	2044.33	26543	40S ribosomal protein S3 OS=Saccharomyces cerevisiae (strain ATCC 204508 / S288c) GN=RPS3 PE=1 SV=5	4.20228e+08	4.57364e+08	4.43766e+08	5.05683e+08	3.80189e+08	3.87278e+08	3.95008e+08	4.12487e+08	3.53634e+08	5.65762e+08	4.88225e+08	5.60301e+08	3.16019e+08	4.08599e+08	4.27739e+08	3.49756e+08
P30619	7	7	377.09	83714	Protein transport protein SEC1 OS=Saccharomyces cerevisiae (strain ATCC 204508 / S288c) GN=SEC1 PE=1 SV=1	868319	1.05671e+06	920043	1.01021e+06	1.20337e+06	1.09796e+06	1.24812e+06	1.34257e+06	730717	1.30716e+06	1.01222e+06	1.11932e+06	1.00026e+06	1.1584e+06	1.35154e+06	1.13839e+06
P17106	11	11	908.06	39421	Centromere-binding protein 1 OS=Saccharomyces cerevisiae (strain ATCC 204508 / S288c) GN=CBF1 PE=1 SV=2	2.13345e+06	2.376e+06	2.73671e+06	2.60668e+06	4.09532e+06	3.9695e+06	4.54821e+06	5.83798e+06	1.79536e+06	2.93912e+06	3.01088e+06	2.88822e+06	3.40409e+06	4.18804e+06	4.92509e+06	4.95014e+06
Q06287	10	10	471.66	28220	Ribosomal RNA small subunit methyltransferase NEP1 OS=Saccharomyces cerevisiae (strain ATCC 204508 / S288c) GN=EMG1 PE=1 SV=1	4.90201e+06	5.47057e+06	5.35782e+06	5.42629e+06	3.98523e+06	4.48532e+06	4.30413e+06	5.03371e+06	4.12519e+06	6.76713e+06	5.8946e+06	6.01238e+06	3.31258e+06	4.73226e+06	4.66078e+06	4.26819e+06
P36103	2	2	99.02	32388	Uncharacterized protein YKL023W OS=Saccharomyces cerevisiae (strain ATCC 204508 / S288c) GN=YKL023W PE=1 SV=2	152598	199190	143744	173297	205037	278735	332255	262761	128416	246399	158145	192014	170430	294081	359786	222800
P42949	2	2	80.55	16263	Mitochondrial import inner membrane translocase subunit TIM16 OS=Saccharomyces cerevisiae (strain ATCC 204508 / S288c) GN=PAM16 PE=1 SV=1	1.29623e+06	1.02426e+06	1.2847e+06	1.25729e+06	1.74468e+06	1.76018e+06	2.08361e+06	1.85316e+06	1.09082e+06	1.26702e+06	1.41341e+06	1.39309e+06	1.4502e+06	1.85709e+06	2.25626e+06	1.57133e+06
P32366	11	11	987.74	40108	V-type proton ATPase subunit d OS=Saccharomyces cerevisiae (strain ATCC 204508 / S288c) GN=VMA6 PE=1 SV=2	1.61497e+07	1.71811e+07	1.85208e+07	1.82015e+07	1.22633e+07	1.31098e+07	1.29913e+07	1.31669e+07	1.35904e+07	2.12531e+07	2.03763e+07	2.01674e+07	1.01934e+07	1.38316e+07	1.40677e+07	1.11645e+07
P53303	13	13	866.62	55892	Zinc finger protein ZPR1 OS=Saccharomyces cerevisiae (strain ATCC 204508 / S288c) GN=ZPR1 PE=1 SV=1	8.29329e+06	9.57498e+06	9.7959e+06	1.07393e+07	5.31804e+06	5.47786e+06	5.9305e+06	7.38152e+06	6.97905e+06	1.18443e+07	1.07773e+07	1.18992e+07	4.42043e+06	5.77944e+06	6.42192e+06	6.25894e+06
Q08208	11	11	551.86	52138	Nucleolar protein 12 OS=Saccharomyces cerevisiae (strain ATCC 204508 / S288c) GN=NOP12 PE=1 SV=1	7.69303e+06	8.77042e+06	9.21439e+06	9.52365e+06	5.46422e+06	6.705e+06	6.09423e+06	6.86149e+06	6.47392e+06	1.08491e+07	1.01375e+07	1.05523e+07	4.54194e+06	7.07414e+06	6.59921e+06	5.81799e+06
P53859	4	4	158.42	31849	Exosome complex component CSL4 OS=Saccharomyces cerevisiae (strain ATCC 204508 / S288c) GN=CSL4 PE=1 SV=1	3.12001e+06	2.80711e+06	3.41484e+06	2.87316e+06	2.46958e+06	2.64833e+06	2.39588e+06	2.66457e+06	2.62558e+06	3.47241e+06	3.75696e+06	3.18349e+06	2.05275e+06	2.79413e+06	2.5944e+06	2.25934e+06
Q04602	5	5	258.79	86597	Vacuolar basic amino acid transporter 4 OS=Saccharomyces cerevisiae (strain ATCC 204508 / S288c) GN=VBA4 PE=1 SV=1	2.25998e+06	2.26344e+06	2.34346e+06	2.56165e+06	839286	1.44468e+06	918629	1.44394e+06	1.90184e+06	2.79989e+06	2.57824e+06	2.83833e+06	697627	1.52422e+06	994749	1.22434e+06
Q02776	17	16	957.51	55121	Mitochondrial import inner membrane translocase subunit TIM50 OS=Saccharomyces cerevisiae (strain ATCC 204508 / S288c) GN=TIM50 PE=1 SV=1	5.17035e+06	4.65162e+06	5.40879e+06	5.35681e+06	7.58947e+06	6.94548e+06	6.42664e+06	6.78967e+06	4.35101e+06	5.75407e+06	5.95067e+06	5.93539e+06	6.30848e+06	7.32786e+06	6.95916e+06	5.7571e+06
P39012	4	4	196.7	69519	GPI transamidase component GAA1 OS=Saccharomyces cerevisiae (strain ATCC 204508 / S288c) GN=GAA1 PE=1 SV=1	1.31147e+06	1.09314e+06	1.1657e+06	1.10029e+06	932632	883680	873675	877889	1.10364e+06	1.35222e+06	1.28248e+06	1.21913e+06	775218	932330	946070	744380
P32843	9	9	512.32	96857	Mitochondrial escape protein 2 OS=Saccharomyces cerevisiae (strain ATCC 204508 / S288c) GN=YME2 PE=1 SV=1	584950	461267	492120	369901	1.04716e+06	930152	780203	1.03252e+06	492253	570590	541424	409853	870411	981361	844852	875493
P32481	27	26	1917.82	58400	Eukaryotic translation initiation factor 2 subunit gamma OS=Saccharomyces cerevisiae (strain ATCC 204508 / S288c) GN=GCD11 PE=1 SV=1	3.01026e+07	3.00901e+07	3.16546e+07	3.42054e+07	2.41198e+07	2.43736e+07	2.48839e+07	2.68544e+07	2.53323e+07	3.72216e+07	3.48259e+07	3.78999e+07	2.00488e+07	2.57155e+07	2.69459e+07	2.27704e+07
P38891	14	13	1108.35	43797	Branched-chain-amino-acid aminotransferase, mitochondrial OS=Saccharomyces cerevisiae (strain ATCC 204508 / S288c) GN=BAT1 PE=1 SV=1	3.69607e+07	3.98401e+07	3.21563e+07	3.27416e+07	2.84385e+07	2.7727e+07	2.88082e+07	2.82569e+07	3.11035e+07	4.92823e+07	3.53778e+07	3.6278e+07	2.36385e+07	2.92534e+07	3.11953e+07	2.39596e+07
P52286	7	7	366.7	22374	Suppressor of kinetochore protein 1 OS=Saccharomyces cerevisiae (strain ATCC 204508 / S288c) GN=SKP1 PE=1 SV=2	5.00495e+06	4.67536e+06	4.51444e+06	4.79105e+06	7.98903e+06	7.02897e+06	7.11418e+06	8.01488e+06	4.21182e+06	5.78345e+06	4.96672e+06	5.30852e+06	6.64061e+06	7.41595e+06	7.70368e+06	6.79598e+06
P38631	50	22	3865.47	216594	1,3-beta-glucan synthase component FKS1 OS=Saccharomyces cerevisiae (strain ATCC 204508 / S288c) GN=FKS1 PE=1 SV=2	2.59596e+07	2.49211e+07	2.93362e+07	3.21315e+07	1.6354e+07	2.1778e+07	1.72785e+07	2.23557e+07	2.18458e+07	3.08275e+07	3.22752e+07	3.5602e+07	1.35937e+07	2.29769e+07	1.87102e+07	1.89558e+07
P38219	31	31	2256.26	44488	Obg-like ATPase 1 OS=Saccharomyces cerevisiae (strain ATCC 204508 / S288c) GN=OLA1 PE=1 SV=1	5.94737e+07	5.11239e+07	5.10037e+07	5.80733e+07	4.76113e+07	4.87788e+07	4.49517e+07	4.85599e+07	5.00489e+07	6.32406e+07	5.61135e+07	6.43457e+07	3.95752e+07	5.14643e+07	4.86765e+07	4.1175e+07
Q03674	2	2	80.67	75979	Lysophospholipase 2 OS=Saccharomyces cerevisiae (strain ATCC 204508 / S288c) GN=PLB2 PE=1 SV=1	467800	589245	474344	418603	1.01999e+06	889134	995396	1.15756e+06	393668	728899	521866	463816	847831	938085	1.07788e+06	981516
P53066	7	7	632.65	20176	Ankyrin repeat-containing protein YGL242C OS=Saccharomyces cerevisiae (strain ATCC 204508 / S288c) GN=YGL242C PE=1 SV=1	9.7293e+06	1.04422e+07	1.00971e+07	1.08339e+07	1.38335e+07	1.32554e+07	1.30262e+07	1.5126e+07	8.1875e+06	1.2917e+07	1.11087e+07	1.20041e+07	1.14986e+07	1.39851e+07	1.41056e+07	1.28257e+07
P38804	4	4	346.63	12002	Restriction of telomere capping protein 3 OS=Saccharomyces cerevisiae (strain ATCC 204508 / S288c) GN=RTC3 PE=1 SV=1	340886	325020	328647	229142	1.15095e+06	530219	776078	426362	286866	402051	361573	253891	956685	559410	840386	361521
P53250	8	8	623.58	37162	Twinfilin-1 OS=Saccharomyces cerevisiae (strain ATCC 204508 / S288c) GN=TWF1 PE=1 SV=1	1.684e+06	1.77311e+06	1.96841e+06	1.84273e+06	2.66905e+06	2.47283e+06	2.34381e+06	2.51818e+06	1.41714e+06	2.19335e+06	2.16561e+06	2.04176e+06	2.21855e+06	2.60897e+06	2.53802e+06	2.13521e+06
P22211	5	4	193.1	86621	Nitrogen permease reactivator protein OS=Saccharomyces cerevisiae (strain ATCC 204508 / S288c) GN=NPR1 PE=1 SV=2	181358	161654	156513	193813	295505	256428	217090	309535	152619	199967	172193	214746	245628	270546	235079	262461
P07806	47	46	3836.34	126432	Valine--tRNA ligase, mitochondrial OS=Saccharomyces cerevisiae (strain ATCC 204508 / S288c) GN=VAS1 PE=1 SV=2	3.80197e+07	4.32363e+07	4.20057e+07	4.20635e+07	3.16778e+07	4.00268e+07	3.65458e+07	3.84333e+07	3.19947e+07	5.34836e+07	4.62141e+07	4.66067e+07	2.63311e+07	4.22305e+07	3.95741e+07	3.25884e+07
Q02888	2	2	54.13	21829	Inner membrane assembly complex subunit 17 OS=Saccharomyces cerevisiae (strain ATCC 204508 / S288c) GN=INA17 PE=1 SV=1	110359	87442.9	95535.6	93052.7	246458	170121	257031	177934	92870.8	108167	105107	103103	204859	179487	278330	150874
Q04178	12	12	605.11	25289	Hypoxanthine-guanine phosphoribosyltransferase OS=Saccharomyces cerevisiae (strain ATCC 204508 / S288c) GN=HPT1 PE=1 SV=1	1.02863e+07	1.14208e+07	1.197e+07	1.26921e+07	6.55018e+06	8.13391e+06	8.40964e+06	8.8938e+06	8.65621e+06	1.41276e+07	1.31692e+07	1.4063e+07	5.4446e+06	8.58172e+06	9.10649e+06	7.54123e+06
P13185	5	5	318.49	120338	Serine/threonine protein kinase KIN1 OS=Saccharomyces cerevisiae (strain ATCC 204508 / S288c) GN=KIN1 PE=1 SV=3	662083	668756	650546	650332	1.18661e+06	921139	863727	964401	557163	827254	715721	720573	986326	971852	935298	817736
P40052	3	3	247.21	23240	Uncharacterized protein YER079W OS=Saccharomyces cerevisiae (strain ATCC 204508 / S288c) GN=YER079W PE=1 SV=1	104649	204038	109550	161537	360068	333409	382033	408054	88065.1	252396	120525	178984	299294	351764	413689	345997
P28737	2	2	119.9	40489	Protein MSP1 OS=Saccharomyces cerevisiae (strain ATCC 204508 / S288c) GN=MSP1 PE=1 SV=2	108644	32030.5	36429.8	41768.4	44810.7	146593	63567	204069	91426.9	39621.9	40079.5	46279.7	37247.3	154663	68834.4	173034
P47116	10	10	654.24	91800	Serine/threonine-protein kinase PTK2/STK2 OS=Saccharomyces cerevisiae (strain ATCC 204508 / S288c) GN=PTK2 PE=1 SV=1	959252	1.00415e+06	919989	1.06434e+06	1.49041e+06	1.58177e+06	1.25438e+06	1.98339e+06	807240	1.24213e+06	1.01216e+06	1.17929e+06	1.23885e+06	1.66886e+06	1.35833e+06	1.68175e+06
P34761	5	5	451.32	71438	Protein WHI3 OS=Saccharomyces cerevisiae (strain ATCC 204508 / S288c) GN=WHI3 PE=1 SV=1	1.30432e+06	1.23525e+06	1.31093e+06	1.43853e+06	1.90147e+06	1.95949e+06	1.73892e+06	1.96719e+06	1.09762e+06	1.52801e+06	1.44227e+06	1.59391e+06	1.58053e+06	2.06737e+06	1.88302e+06	1.66802e+06
Q00816	6	6	273.81	112719	Resistance to glucose repression protein 1 OS=Saccharomyces cerevisiae (strain ATCC 204508 / S288c) GN=REG1 PE=1 SV=1	542276	557556	515285	613831	995516	791495	888036	1.00113e+06	456342	689699	566909	680130	827488	835071	961621	848875
P18562	12	12	953.8	24864	Uracil phosphoribosyltransferase OS=Saccharomyces cerevisiae (strain ATCC 204508 / S288c) GN=FUR1 PE=1 SV=2	1.71005e+07	1.68003e+07	1.85602e+07	1.86807e+07	1.29315e+07	1.48178e+07	1.18522e+07	1.46712e+07	1.43906e+07	2.07821e+07	2.04196e+07	2.06984e+07	1.07489e+07	1.56335e+07	1.28342e+07	1.244e+07
P32899	3	3	175.42	21986	U3 small nucleolar ribonucleoprotein protein IMP3 OS=Saccharomyces cerevisiae (strain ATCC 204508 / S288c) GN=IMP3 PE=1 SV=1	3.40556e+06	4.03586e+06	3.98855e+06	4.08234e+06	2.23939e+06	2.27299e+06	2.39776e+06	2.86122e+06	2.86588e+06	4.99238e+06	4.38815e+06	4.52327e+06	1.86141e+06	2.39813e+06	2.59644e+06	2.42609e+06
P32337	14	14	1213.69	121809	Importin subunit beta-3 OS=Saccharomyces cerevisiae (strain ATCC 204508 / S288c) GN=PSE1 PE=1 SV=2	6.12358e+06	6.42384e+06	5.69961e+06	6.4962e+06	5.02288e+06	5.19184e+06	5.20272e+06	5.97375e+06	5.15318e+06	7.94632e+06	6.27063e+06	7.19784e+06	4.17509e+06	5.47767e+06	5.63383e+06	5.06527e+06
P39105	4	3	147.01	72136	Lysophospholipase 1 OS=Saccharomyces cerevisiae (strain ATCC 204508 / S288c) GN=PLB1 PE=1 SV=2	318449	510802	385387	343679	544968	480975	594330	479627	267984	631865	423997	380800	452985	507455	643578	406685
P06208	28	17	2393.78	68880	2-isopropylmalate synthase OS=Saccharomyces cerevisiae (strain ATCC 204508 / S288c) GN=LEU4 PE=1 SV=1	1.96967e+07	1.71204e+07	1.60329e+07	1.65214e+07	2.52659e+07	2.30972e+07	2.34243e+07	2.31807e+07	1.65754e+07	2.1178e+07	1.76392e+07	1.83059e+07	2.10014e+07	2.43688e+07	2.53653e+07	1.96554e+07
Q08962	2	2	165.38	20425	60S ribosome subunit biogenesis protein NIP7 OS=Saccharomyces cerevisiae (strain ATCC 204508 / S288c) GN=NIP7 PE=1 SV=1	1.82346e+06	1.4557e+06	1.95076e+06	1.90451e+06	1.09228e+06	1.22814e+06	1.25494e+06	1.6921e+06	1.5345e+06	1.80071e+06	2.1462e+06	2.11021e+06	907920	1.29576e+06	1.35893e+06	1.43476e+06
Q00955;P32874	102	100	8039.1	250881	Acetyl-CoA carboxylase OS=Saccharomyces cerevisiae (strain ATCC 204508 / S288c) GN=ACC1 PE=1 SV=2	2.81655e+07	2.656e+07	2.51435e+07	2.62135e+07	3.9603e+07	3.40592e+07	3.35358e+07	3.68504e+07	2.37021e+07	3.28548e+07	2.76626e+07	2.90448e+07	3.29186e+07	3.59343e+07	3.63147e+07	3.12462e+07
Q12427	3	3	212.88	56344	Protein STB3 OS=Saccharomyces cerevisiae (strain ATCC 204508 / S288c) GN=STB3 PE=1 SV=1	814153	803371	912978	706723	1.46971e+06	1.33446e+06	1.16946e+06	1.63637e+06	685135	993774	1.00444e+06	783055	1.22164e+06	1.40792e+06	1.26637e+06	1.38751e+06
Q05905	9	8	573.98	27541	Protein HRI1 OS=Saccharomyces cerevisiae (strain ATCC 204508 / S288c) GN=HRI1 PE=1 SV=1	9.24278e+06	1.10608e+07	9.39544e+06	9.38115e+06	7.35166e+06	8.4899e+06	8.05943e+06	7.51712e+06	7.77808e+06	1.36823e+07	1.03367e+07	1.03944e+07	6.11081e+06	8.95731e+06	8.72725e+06	6.37392e+06
P38426	22	19	1217.02	119502	Trehalose synthase complex regulatory subunit TPS3 OS=Saccharomyces cerevisiae (strain ATCC 204508 / S288c) GN=TPS3 PE=1 SV=3	3.41476e+06	2.95785e+06	3.06217e+06	2.92729e+06	4.75521e+06	3.92548e+06	3.24226e+06	4.26639e+06	2.87362e+06	3.65887e+06	3.36895e+06	3.24346e+06	3.9526e+06	4.1416e+06	3.51092e+06	3.61756e+06
P53616	5	4	284.09	44042	Probable secreted beta-glucosidase SUN4 OS=Saccharomyces cerevisiae (strain ATCC 204508 / S288c) GN=SUN4 PE=1 SV=1	1.92109e+06	1.97513e+06	2.1984e+06	2.00872e+06	1.52709e+06	1.3191e+06	1.39119e+06	1.06464e+06	1.61665e+06	2.44325e+06	2.41865e+06	2.22568e+06	1.26934e+06	1.39173e+06	1.50647e+06	902733
P25040	5	5	220.45	46478	20S rRNA accumulation protein 4 OS=Saccharomyces cerevisiae (strain ATCC 204508 / S288c) GN=TSR4 PE=1 SV=2	1.46189e+06	1.46164e+06	1.35841e+06	1.30665e+06	980479	907356	857076	1.42064e+06	1.23023e+06	1.80806e+06	1.4945e+06	1.44778e+06	814989	957310	928096	1.20459e+06
P31787	9	8	800.8	10055	Acyl-CoA-binding protein OS=Saccharomyces cerevisiae (strain ATCC 204508 / S288c) GN=ACB1 PE=1 SV=3	2.32478e+07	4.0591e+07	3.7323e+07	3.62037e+07	5.78336e+07	5.7945e+07	7.05376e+07	5.97703e+07	1.95637e+07	5.02113e+07	4.10622e+07	4.0114e+07	4.80722e+07	6.11352e+07	7.63825e+07	5.06804e+07
Q12179	4	4	237.34	52623	Uncharacterized protein YPL245W OS=Saccharomyces cerevisiae (strain ATCC 204508 / S288c) GN=YPL245W PE=1 SV=1	520849	437709	443865	367792	193953	217183	187710	226688	438310	541448	488334	407516	161217	229140	203265	192213
P38779	8	8	443.44	42561	Proteasome-interacting protein CIC1 OS=Saccharomyces cerevisiae (strain ATCC 204508 / S288c) GN=CIC1 PE=1 SV=1	3.6049e+06	4.14366e+06	4.52878e+06	3.96905e+06	1.96699e+06	2.78282e+06	2.83189e+06	3.04761e+06	3.03363e+06	5.12572e+06	4.98249e+06	4.39773e+06	1.63499e+06	2.93603e+06	3.06654e+06	2.58413e+06
P35845	6	5	238.29	135470	Oxysterol-binding protein homolog 1 OS=Saccharomyces cerevisiae (strain ATCC 204508 / S288c) GN=SWH1 PE=1 SV=4	833319	682116	816718	924954	1.66274e+06	1.4609e+06	1.37629e+06	2.80698e+06	701263	843781	898541	1.02486e+06	1.38209e+06	1.54133e+06	1.49033e+06	2.38009e+06
P07278	17	17	898.79	47304	cAMP-dependent protein kinase regulatory subunit OS=Saccharomyces cerevisiae (strain ATCC 204508 / S288c) GN=BCY1 PE=1 SV=4	6.70869e+06	6.94297e+06	6.16443e+06	6.57875e+06	1.3441e+07	1.15804e+07	1.1687e+07	7.84185e+06	5.64556e+06	8.58848e+06	6.78202e+06	7.28931e+06	1.11724e+07	1.22179e+07	1.26554e+07	6.64926e+06
P52489	10	8	740.95	55446	Pyruvate kinase 2 OS=Saccharomyces cerevisiae (strain ATCC 204508 / S288c) GN=PYK2 PE=1 SV=1	1.17078e+06	1.57809e+06	1.13813e+06	1.30486e+06	2.71661e+06	1.94723e+06	2.0059e+06	1.79358e+06	985243	1.95211e+06	1.25215e+06	1.4458e+06	2.25809e+06	2.05444e+06	2.17211e+06	1.52081e+06
P00424	5	4	358.35	17130	Cytochrome c oxidase polypeptide 5A, mitochondrial OS=Saccharomyces cerevisiae (strain ATCC 204508 / S288c) GN=COX5A PE=1 SV=1	5.34965e+06	7.27174e+06	6.20063e+06	7.80958e+06	1.89003e+07	1.54435e+07	1.16026e+07	1.78186e+07	4.50189e+06	8.99518e+06	6.82184e+06	8.65308e+06	1.57102e+07	1.62937e+07	1.25641e+07	1.51088e+07
P47075	29	27	1839.99	83331	Vacuolar transporter chaperone 4 OS=Saccharomyces cerevisiae (strain ATCC 204508 / S288c) GN=VTC4 PE=1 SV=2	4.7431e+06	5.70488e+06	4.51116e+06	6.81249e+06	7.06308e+06	7.51133e+06	8.29851e+06	9.1203e+06	3.99146e+06	7.05697e+06	4.96311e+06	7.5483e+06	5.87094e+06	7.92487e+06	8.98614e+06	7.73329e+06
P81450	2	2	62.26	6683	ATP synthase subunit J, mitochondrial OS=Saccharomyces cerevisiae (strain ATCC 204508 / S288c) GN=ATP18 PE=1 SV=1	791066	707163	753885	1.03983e+06	1.419e+06	2.28543e+06	1.67635e+06	2.05731e+06	665706	874764	829413	1.15214e+06	1.17949e+06	2.41125e+06	1.81525e+06	1.74443e+06
P19358	24	13	2065.91	42515	S-adenosylmethionine synthase 2 OS=Saccharomyces cerevisiae (strain ATCC 204508 / S288c) GN=SAM2 PE=1 SV=3	2.35558e+07	2.16136e+07	2.08292e+07	2.27803e+07	2.73191e+07	2.78537e+07	2.93496e+07	3.47947e+07	1.98229e+07	2.67361e+07	2.29159e+07	2.52408e+07	2.2708e+07	2.93872e+07	3.17815e+07	2.95031e+07
P26321	16	15	2094.31	33751	60S ribosomal protein L5 OS=Saccharomyces cerevisiae (strain ATCC 204508 / S288c) GN=RPL5 PE=1 SV=4	5.57433e+08	5.27752e+08	5.93691e+08	5.39793e+08	4.19121e+08	5.16585e+08	4.69598e+08	4.98622e+08	4.69096e+08	6.52831e+08	6.5317e+08	5.98095e+08	3.4838e+08	5.45026e+08	5.0851e+08	4.22792e+08
P33324	3	2	84.86	36222	CRAL-TRIO domain-containing protein YKL091C OS=Saccharomyces cerevisiae (strain ATCC 204508 / S288c) GN=YKL091C PE=1 SV=2	388394	409927	412314	715178	969727	691230	753038	751706	326846	507081	453622	792423	806052	729285	815436	637387
P53551	5	5	338.81	27843	Histone H1 OS=Saccharomyces cerevisiae (strain ATCC 204508 / S288c) GN=HHO1 PE=1 SV=1	2.10169e+06	2.46442e+06	2.55444e+06	2.39005e+06	3.78323e+06	3.71071e+06	3.68135e+06	3.73291e+06	1.76863e+06	3.0485e+06	2.81036e+06	2.64819e+06	3.14468e+06	3.915e+06	3.98639e+06	3.16521e+06
P38690	2	2	140.41	47005	Uncharacterized protein YHR033W OS=Saccharomyces cerevisiae (strain ATCC 204508 / S288c) GN=YHR033W PE=1 SV=1	9237.76	9155.47	17397.4	28766.7	159912	118895	81016.1	58407.4	7773.85	11325.4	19140.4	31873.8	132921	125441	87729.2	49524.8
P36160	8	8	433.04	39687	Ribosome biogenesis protein RPF2 OS=Saccharomyces cerevisiae (strain ATCC 204508 / S288c) GN=RPF2 PE=1 SV=1	2.12943e+06	2.11311e+06	2.4058e+06	1.96742e+06	2.49926e+06	1.98275e+06	1.60617e+06	1.53683e+06	1.79198e+06	2.61392e+06	2.64682e+06	2.17991e+06	2.07742e+06	2.09191e+06	1.73926e+06	1.30311e+06
P40087	8	8	512.5	47495	DNA damage-inducible protein 1 OS=Saccharomyces cerevisiae (strain ATCC 204508 / S288c) GN=DDI1 PE=1 SV=1	3.85474e+06	3.94133e+06	3.84889e+06	3.79015e+06	4.90711e+06	4.9082e+06	5.1024e+06	5.35074e+06	3.24388e+06	4.87545e+06	4.23449e+06	4.19952e+06	4.07886e+06	5.17841e+06	5.52519e+06	4.537e+06
Q06892	5	5	207.25	46446	NADH kinase POS5, mitochondrial OS=Saccharomyces cerevisiae (strain ATCC 204508 / S288c) GN=POS5 PE=1 SV=2	539680	679467	436973	533788	964539	981921	806307	909057	454157	840503	480752	591441	801740	1.03598e+06	873119	770808
P36124	3	3	95.18	86169	SET domain-containing protein 3 OS=Saccharomyces cerevisiae (strain ATCC 204508 / S288c) GN=SET3 PE=1 SV=1	105708	118331	131781	127962	193725	222841	158708	176669	88956.5	146375	144983	141783	161027	235109	171859	149802
P38230	9	8	590.62	37110	Probable quinone oxidoreductase OS=Saccharomyces cerevisiae (strain ATCC 204508 / S288c) GN=ZTA1 PE=1 SV=1	833958	1.20091e+06	1.14734e+06	1.21632e+06	1.94315e+06	2.25374e+06	2.19373e+06	2.0327e+06	701801	1.48553e+06	1.26229e+06	1.34769e+06	1.61517e+06	2.37782e+06	2.37551e+06	1.72357e+06
P40335	5	4	479.02	42749	Carboxypeptidase Y-deficient protein 8 OS=Saccharomyces cerevisiae (strain ATCC 204508 / S288c) GN=PEP8 PE=1 SV=2	1.42846e+06	1.35165e+06	1.35876e+06	1.733e+06	1.96643e+06	1.91982e+06	2.05728e+06	1.94503e+06	1.20209e+06	1.672e+06	1.49488e+06	1.92018e+06	1.63453e+06	2.02551e+06	2.22775e+06	1.64923e+06
P38066	4	4	283.44	38707	GTP cyclohydrolase-2 OS=Saccharomyces cerevisiae (strain ATCC 204508 / S288c) GN=RIB1 PE=1 SV=2	507575	495252	497187	566729	624529	794112	711778	1.00626e+06	427139	612629	546998	627940	519118	837832	770758	853225
Q12363	16	14	1639.67	48467	Transcriptional modulator WTM1 OS=Saccharomyces cerevisiae (strain ATCC 204508 / S288c) GN=WTM1 PE=1 SV=1	2.43547e+07	3.2018e+07	2.75782e+07	2.68112e+07	5.92277e+07	4.42442e+07	4.88431e+07	3.46813e+07	2.04952e+07	3.96065e+07	3.03411e+07	2.9707e+07	4.92309e+07	4.66801e+07	5.28903e+07	2.9407e+07
Q03774	8	8	457.46	50856	tRNA (guanine-N(7)-)-methyltransferase non-catalytic subunit TRM82 OS=Saccharomyces cerevisiae (strain ATCC 204508 / S288c) GN=TRM82 PE=1 SV=1	4.82709e+06	6.53663e+06	5.81881e+06	5.98768e+06	3.54645e+06	4.42809e+06	4.75174e+06	3.80729e+06	4.06214e+06	8.08584e+06	6.40177e+06	6.63439e+06	2.94786e+06	4.67187e+06	5.14548e+06	3.22828e+06
Q06631	13	13	1021.85	61223	Protein BFR2 OS=Saccharomyces cerevisiae (strain ATCC 204508 / S288c) GN=BFR2 PE=1 SV=1	1.90148e+06	2.07604e+06	2.53605e+06	2.45623e+06	1.16449e+06	1.49337e+06	1.38554e+06	1.72893e+06	1.60015e+06	2.56807e+06	2.79012e+06	2.72152e+06	967938	1.57559e+06	1.50035e+06	1.466e+06
P15703	11	11	957.19	34325	Glucan 1,3-beta-glucosidase OS=Saccharomyces cerevisiae (strain ATCC 204508 / S288c) GN=BGL2 PE=1 SV=1	3.87133e+07	3.78283e+07	3.24719e+07	2.93779e+07	5.85073e+07	4.51571e+07	5.41268e+07	4.7238e+07	3.25784e+07	4.67938e+07	3.57251e+07	3.25509e+07	4.86322e+07	4.76432e+07	5.86119e+07	4.00541e+07
P16550	14	14	1113.96	36811	Protein APA1 OS=Saccharomyces cerevisiae (strain ATCC 204508 / S288c) GN=APA1 PE=1 SV=4	4.76867e+07	4.85669e+07	4.99048e+07	4.85764e+07	3.60142e+07	3.81808e+07	3.90864e+07	3.08131e+07	4.01298e+07	6.00775e+07	5.49045e+07	5.38231e+07	2.99355e+07	4.02829e+07	4.23252e+07	2.61271e+07
P38703	3	3	137.16	48708	Sphingosine N-acyltransferase LAG1 OS=Saccharomyces cerevisiae (strain ATCC 204508 / S288c) GN=LAG1 PE=1 SV=1	1.74671e+06	1.77645e+06	1.92508e+06	1.95459e+06	1.95057e+06	2.19054e+06	2.21351e+06	2.21501e+06	1.46991e+06	2.19748e+06	2.11794e+06	2.1657e+06	1.62134e+06	2.31114e+06	2.39693e+06	1.87815e+06
P38301	3	3	132.18	30378	GCR1-dependent translation factor 1 OS=Saccharomyces cerevisiae (strain ATCC 204508 / S288c) GN=GDT1 PE=1 SV=1	1.07269e+06	957052	1.20594e+06	1.05583e+06	542161	725663	582968	888879	902704	1.18388e+06	1.32676e+06	1.16986e+06	450652	765614	631274	753699
Q12196	4	4	262.51	56258	Serine/threonine-protein kinase RIO1 OS=Saccharomyces cerevisiae (strain ATCC 204508 / S288c) GN=RIO1 PE=1 SV=1	628782	670697	785604	736213	305950	499965	375865	545889	529139	829655	864310	815730	254310	527491	407010	462871
P33750	13	13	675.94	56925	Protein SOF1 OS=Saccharomyces cerevisiae (strain ATCC 204508 / S288c) GN=SOF1 PE=1 SV=1	2.2016e+06	2.44584e+06	2.47177e+06	2.46245e+06	1.32927e+06	1.72122e+06	1.56525e+06	2.08617e+06	1.85272e+06	3.02552e+06	2.71941e+06	2.72841e+06	1.10491e+06	1.81598e+06	1.69496e+06	1.76891e+06
P40017	3	3	113.97	103783	Carnitine O-acetyltransferase YAT2 OS=Saccharomyces cerevisiae (strain ATCC 204508 / S288c) GN=YAT2 PE=1 SV=1	45367.4	52833.6	58829.2	45261.5	368968	260207	210289	181583	38178	65355.4	64723	50150.1	306691	274532	227714	153968
Q06251	3	2	117.59	71449	Uncharacterized protein YLR177W OS=Saccharomyces cerevisiae (strain ATCC 204508 / S288c) GN=YLR177W PE=1 SV=1	34111	34678.7	35726.4	32340.9	113194	95760.9	113508	85573.4	28705.4	42897.7	39305.6	35834	94088.2	101033	122914	72559.5
P28321	5	4	241.25	35768	Monoglyceride lipase OS=Saccharomyces cerevisiae (strain ATCC 204508 / S288c) GN=YJU3 PE=1 SV=2	1.16897e+06	1.28192e+06	1.38138e+06	1.19206e+06	1.65972e+06	1.69474e+06	1.53497e+06	1.62295e+06	983720	1.58574e+06	1.51977e+06	1.32082e+06	1.37959e+06	1.78804e+06	1.66216e+06	1.37614e+06
P38755	5	3	276.96	49831	Oxysterol-binding protein homolog 7 OS=Saccharomyces cerevisiae (strain ATCC 204508 / S288c) GN=OSH7 PE=1 SV=1	2.12551e+06	1.94141e+06	1.88211e+06	2.53862e+06	2.72939e+06	2.47381e+06	2.61154e+06	2.52659e+06	1.78868e+06	2.40154e+06	2.07067e+06	2.81281e+06	2.26871e+06	2.61001e+06	2.82793e+06	2.14235e+06
P33307	14	14	843.45	109402	Importin alpha re-exporter OS=Saccharomyces cerevisiae (strain ATCC 204508 / S288c) GN=CSE1 PE=1 SV=2	3.1167e+06	2.97326e+06	3.09821e+06	3.62305e+06	2.2823e+06	2.53288e+06	2.52274e+06	2.95816e+06	2.62279e+06	3.67794e+06	3.40861e+06	4.01437e+06	1.89708e+06	2.67232e+06	2.73178e+06	2.50828e+06
P39729	13	13	1072.35	40904	Ribosome-interacting GTPase 1 OS=Saccharomyces cerevisiae (strain ATCC 204508 / S288c) GN=RBG1 PE=1 SV=1	6.25198e+06	6.52704e+06	6.07799e+06	6.25531e+06	3.74331e+06	4.49914e+06	4.4153e+06	5.85992e+06	5.26123e+06	8.07398e+06	6.68692e+06	6.93094e+06	3.11149e+06	4.74684e+06	4.78116e+06	4.96875e+06
P23639	7	7	595.83	27145	Proteasome subunit alpha type-2 OS=Saccharomyces cerevisiae (strain ATCC 204508 / S288c) GN=PRE8 PE=1 SV=1	8.4076e+06	8.91155e+06	9.0003e+06	9.08948e+06	9.84824e+06	1.03163e+07	1.05009e+07	1.09424e+07	7.07525e+06	1.10236e+07	9.902e+06	1.00712e+07	8.186e+06	1.08843e+07	1.1371e+07	9.27828e+06
P39966	14	12	770.32	51041	Protein phosphatase 2C homolog 2 OS=Saccharomyces cerevisiae (strain ATCC 204508 / S288c) GN=PTC2 PE=1 SV=1	3.82583e+06	3.24655e+06	3.71834e+06	3.82375e+06	5.00283e+06	5.85562e+06	5.42703e+06	5.11282e+06	3.21955e+06	4.016e+06	4.09087e+06	4.23674e+06	4.15843e+06	6.178e+06	5.87672e+06	4.33527e+06
P51601	6	6	217.79	27922	GTP cyclohydrolase 1 OS=Saccharomyces cerevisiae (strain ATCC 204508 / S288c) GN=FOL2 PE=1 SV=1	917956	1.04575e+06	978988	896056	859751	836859	882495	852895	772488	1.2936e+06	1.07707e+06	992837	714638	882931	955620	723187
Q12306	5	5	576.49	11590	Ubiquitin-like protein SMT3 OS=Saccharomyces cerevisiae (strain ATCC 204508 / S288c) GN=SMT3 PE=1 SV=1	1.18648e+07	1.71059e+07	1.49945e+07	1.57875e+07	2.14874e+07	2.34547e+07	2.19539e+07	2.41766e+07	9.98458e+06	2.11601e+07	1.64967e+07	1.74927e+07	1.78607e+07	2.47459e+07	2.37731e+07	2.04998e+07
P46681	15	15	853.49	59402	D-lactate dehydrogenase [cytochrome] 2, mitochondrial OS=Saccharomyces cerevisiae (strain ATCC 204508 / S288c) GN=DLD2 PE=1 SV=1	2.98727e+06	2.85222e+06	2.32506e+06	2.55598e+06	3.41577e+06	3.69624e+06	4.13087e+06	3.48526e+06	2.51388e+06	3.52821e+06	2.558e+06	2.83204e+06	2.83924e+06	3.89973e+06	4.47316e+06	2.95523e+06
P39006	7	7	307.98	56844	Phosphatidylserine decarboxylase proenzyme 1, mitochondrial OS=Saccharomyces cerevisiae (strain ATCC 204508 / S288c) GN=PSD1 PE=1 SV=1	507490	504308	559262	599348	1.23102e+06	929172	991971	1.20066e+06	427068	623831	615292	664082	1.02324e+06	980327	1.07417e+06	1.01806e+06
P39938	4	4	398.49	13724	40S ribosomal protein S26-A OS=Saccharomyces cerevisiae (strain ATCC 204508 / S288c) GN=RPS26A PE=1 SV=1	1.73406e+08	1.67477e+08	1.86268e+08	1.77744e+08	1.50328e+08	1.66439e+08	1.38823e+08	1.83804e+08	1.45926e+08	2.0717e+08	2.0493e+08	1.96942e+08	1.24955e+08	1.75602e+08	1.50326e+08	1.55851e+08
P09232	11	11	771.46	69807	Cerevisin OS=Saccharomyces cerevisiae (strain ATCC 204508 / S288c) GN=PRB1 PE=1 SV=1	5.25911e+06	8.03146e+06	8.74995e+06	7.05036e+06	1.61441e+07	1.3328e+07	1.21243e+07	1.31281e+07	4.4257e+06	9.93495e+06	9.62656e+06	7.81186e+06	1.34192e+07	1.40618e+07	1.3129e+07	1.11316e+07
P10659	22	11	2301.51	42077	S-adenosylmethionine synthase 1 OS=Saccharomyces cerevisiae (strain ATCC 204508 / S288c) GN=SAM1 PE=1 SV=2	6.87567e+07	6.44273e+07	6.91987e+07	6.87165e+07	4.60574e+07	5.76127e+07	4.93173e+07	6.3197e+07	5.78608e+07	7.96969e+07	7.61313e+07	7.61384e+07	3.82836e+07	6.07846e+07	5.34039e+07	5.3586e+07
P38801	4	4	187.03	21032	Exosome complex protein LRP1 OS=Saccharomyces cerevisiae (strain ATCC 204508 / S288c) GN=LRP1 PE=1 SV=1	561398	707479	760290	737413	268272	383326	423844	510554	472433	875155	836460	817060	222991	404430	458964	432909
P53879	5	5	443.6	37138	GTP-binding protein RHO5 OS=Saccharomyces cerevisiae (strain ATCC 204508 / S288c) GN=RHO5 PE=1 SV=2	1.05021e+06	1.03751e+06	1.15838e+06	1.14131e+06	1.66271e+06	1.41142e+06	1.43083e+06	1.93701e+06	883783	1.28341e+06	1.27443e+06	1.26458e+06	1.38207e+06	1.48913e+06	1.54939e+06	1.64243e+06
Q02950	3	3	123.62	39421	37S ribosomal protein MRP51, mitochondrial OS=Saccharomyces cerevisiae (strain ATCC 204508 / S288c) GN=MRP51 PE=1 SV=1	184841	46726.2	142065	217855	463112	545037	512000	408362	155550	57800.5	156297	241385	384945	575044	554425	346259
P38736	6	6	367.41	25493	Golgi SNAP receptor complex member 1 OS=Saccharomyces cerevisiae (strain ATCC 204508 / S288c) GN=GOS1 PE=1 SV=1	1.31312e+06	1.41104e+06	1.28193e+06	1.25834e+06	2.13566e+06	2.15741e+06	1.71993e+06	2.23323e+06	1.10503e+06	1.74546e+06	1.41036e+06	1.39425e+06	1.77519e+06	2.27619e+06	1.86244e+06	1.8936e+06
P00410	8	8	680.03	28777	Cytochrome c oxidase subunit 2 OS=Saccharomyces cerevisiae (strain ATCC 204508 / S288c) GN=COX2 PE=1 SV=1	4.10575e+06	2.29236e+06	3.73071e+06	4.67285e+06	1.45853e+07	1.17227e+07	6.40955e+06	1.00472e+07	3.45511e+06	2.83565e+06	4.10447e+06	5.17755e+06	1.21235e+07	1.23681e+07	6.94066e+06	8.51923e+06
Q02201	7	5	335.71	51727	Oxysterol-binding protein homolog 6 OS=Saccharomyces cerevisiae (strain ATCC 204508 / S288c) GN=OSH6 PE=1 SV=1	766561	840230	735520	945316	994760	892643	942272	926859	645084	1.03937e+06	809208	1.04742e+06	826859	941787	1.02035e+06	785903
P33303	2	2	79.42	35489	Succinate/fumarate mitochondrial transporter OS=Saccharomyces cerevisiae (strain ATCC 204508 / S288c) GN=SFC1 PE=1 SV=2	153256	93270.8	109173	160742	509900	560680	444516	421010	128970	115376	120110	178104	423836	591548	481350	356983
P21264	13	13	756.61	62813	Phosphoribosylaminoimidazole carboxylase OS=Saccharomyces cerevisiae (strain ATCC 204508 / S288c) GN=ADE2 PE=1 SV=1	6.17475e+06	8.22529e+06	7.88987e+06	9.30528e+06	4.74939e+06	5.47824e+06	5.51393e+06	4.22549e+06	5.19624e+06	1.01747e+07	8.68032e+06	1.03103e+07	3.94777e+06	5.77984e+06	5.97082e+06	3.58288e+06
P32458	10	9	779.54	47790	Cell division control protein 11 OS=Saccharomyces cerevisiae (strain ATCC 204508 / S288c) GN=CDC11 PE=1 SV=1	3.20168e+06	3.17479e+06	3.04398e+06	3.24473e+06	3.6521e+06	4.06274e+06	4.16395e+06	4.9085e+06	2.69431e+06	3.92723e+06	3.34894e+06	3.59518e+06	3.03568e+06	4.28641e+06	4.50899e+06	4.16202e+06
P07342	30	29	2701.83	75061	Acetolactate synthase catalytic subunit, mitochondrial OS=Saccharomyces cerevisiae (strain ATCC 204508 / S288c) GN=ILV2 PE=1 SV=1	3.06522e+07	3.21818e+07	2.62619e+07	2.89391e+07	2.90557e+07	3.01624e+07	3.02262e+07	3.21514e+07	2.57947e+07	3.98091e+07	2.8893e+07	3.20648e+07	2.41516e+07	3.1823e+07	3.27308e+07	2.72618e+07
Q12133	5	5	186.66	21336	Signal peptidase complex subunit SPC3 OS=Saccharomyces cerevisiae (strain ATCC 204508 / S288c) GN=SPC3 PE=1 SV=1	1.75838e+06	1.86085e+06	1.84111e+06	1.82196e+06	2.22176e+06	2.20822e+06	2.13978e+06	2.51046e+06	1.47973e+06	2.30188e+06	2.02556e+06	2.01874e+06	1.84676e+06	2.32979e+06	2.31709e+06	2.12867e+06
Q12344	6	6	296.68	101852	GTPase-activating protein GYP5 OS=Saccharomyces cerevisiae (strain ATCC 204508 / S288c) GN=GYP5 PE=1 SV=1	553702	722635	596280	666257	1.30684e+06	889749	1.01366e+06	1.46278e+06	465957	893903	656019	738218	1.08627e+06	938733	1.09765e+06	1.24032e+06
P53335	2	2	218.18	31350	Protein PXR1 OS=Saccharomyces cerevisiae (strain ATCC 204508 / S288c) GN=PXR1 PE=1 SV=1	1.17472e+06	1.32158e+06	1.63376e+06	1.8585e+06	623317	688470	795494	1.06509e+06	988559	1.63481e+06	1.79744e+06	2.05923e+06	518111	726374	861410	903111
P53072	5	5	217.31	33928	tRNA acetyltransferase TAN1 OS=Saccharomyces cerevisiae (strain ATCC 204508 / S288c) GN=TAN1 PE=1 SV=1	1.70705e+06	1.89701e+06	1.87053e+06	1.83905e+06	2.30279e+06	2.27763e+06	2.29169e+06	2.34706e+06	1.43653e+06	2.34661e+06	2.05793e+06	2.03768e+06	1.91411e+06	2.40302e+06	2.48159e+06	1.99012e+06
Q04439	17	12	1156.05	137328	Myosin-5 OS=Saccharomyces cerevisiae (strain ATCC 204508 / S288c) GN=MYO5 PE=1 SV=1	1.64871e+06	1.78721e+06	1.73075e+06	1.60302e+06	2.02443e+06	2.00453e+06	1.97763e+06	1.90701e+06	1.38744e+06	2.21078e+06	1.90415e+06	1.77616e+06	1.68273e+06	2.11489e+06	2.1415e+06	1.617e+06
P07274	3	3	252.99	13726	Profilin OS=Saccharomyces cerevisiae (strain ATCC 204508 / S288c) GN=PFY1 PE=1 SV=2	1.25017e+07	1.73673e+07	1.36606e+07	1.53708e+07	2.43498e+07	2.12363e+07	2.32901e+07	1.97606e+07	1.05206e+07	2.14835e+07	1.50291e+07	1.70309e+07	2.02399e+07	2.24054e+07	2.522e+07	1.67554e+07
P40470	2	2	111.84	23888	Regulator of rDNA transcription protein 14 OS=Saccharomyces cerevisiae (strain ATCC 204508 / S288c) GN=RRT14 PE=1 SV=1	270781	412777	403691	429318	145842	199790	217196	272881	227870	510607	444135	475688	121226	210790	235194	231381
Q02892	13	13	943.82	74763	Nucleolar GTP-binding protein 1 OS=Saccharomyces cerevisiae (strain ATCC 204508 / S288c) GN=NOG1 PE=1 SV=1	9.94274e+06	1.24211e+07	1.28988e+07	1.13935e+07	5.18905e+06	6.83299e+06	6.92847e+06	7.78719e+06	8.36712e+06	1.5365e+07	1.41911e+07	1.26241e+07	4.31322e+06	7.20917e+06	7.50257e+06	6.60292e+06
P35191	7	7	639.25	56096	DnaJ homolog 1, mitochondrial OS=Saccharomyces cerevisiae (strain ATCC 204508 / S288c) GN=MDJ1 PE=1 SV=1	1.81101e+06	1.67727e+06	1.57258e+06	1.70434e+06	2.78287e+06	2.9367e+06	2.56378e+06	2.6217e+06	1.52402e+06	2.07479e+06	1.73013e+06	1.88842e+06	2.31316e+06	3.09838e+06	2.77622e+06	2.22299e+06
P00445	10	9	1068.71	15959	Superoxide dismutase [Cu-Zn] OS=Saccharomyces cerevisiae (strain ATCC 204508 / S288c) GN=SOD1 PE=1 SV=2	9.98482e+07	1.18523e+08	1.11675e+08	1.22473e+08	1.93711e+08	1.49737e+08	1.52221e+08	1.79911e+08	8.40253e+07	1.46613e+08	1.22863e+08	1.35701e+08	1.61016e+08	1.5798e+08	1.64834e+08	1.5255e+08
Q02204	4	4	263.95	30424	54S ribosomal protein L13, mitochondrial OS=Saccharomyces cerevisiae (strain ATCC 204508 / S288c) GN=MRPL13 PE=1 SV=2	1.74155e+06	2.0892e+06	2.24565e+06	2.51949e+06	4.3843e+06	4.4563e+06	4.31571e+06	7.38584e+06	1.46557e+06	2.58435e+06	2.47064e+06	2.79161e+06	3.64429e+06	4.70164e+06	4.67332e+06	6.2626e+06
P29547	19	13	1442.9	47172	Elongation factor 1-gamma 1 OS=Saccharomyces cerevisiae (strain ATCC 204508 / S288c) GN=CAM1 PE=1 SV=2	2.53829e+07	2.86293e+07	2.64865e+07	2.8936e+07	3.33087e+07	3.1861e+07	3.06034e+07	3.05122e+07	2.13604e+07	3.54145e+07	2.914e+07	3.20613e+07	2.76867e+07	3.3615e+07	3.31392e+07	2.58719e+07
P53900	2	2	122.89	15171	Prefoldin subunit 4 OS=Saccharomyces cerevisiae (strain ATCC 204508 / S288c) GN=GIM3 PE=1 SV=1	2.50733e+06	2.2356e+06	2.52683e+06	2.50979e+06	1.75874e+06	2.02206e+06	1.66758e+06	2.15992e+06	2.10999e+06	2.76544e+06	2.77998e+06	2.78086e+06	1.46189e+06	2.13339e+06	1.80576e+06	1.83144e+06
Q03102	8	8	542.31	40122	Uncharacterized membrane protein YML131W OS=Saccharomyces cerevisiae (strain ATCC 204508 / S288c) GN=YML131W PE=1 SV=1	3.54708e+06	4.34192e+06	3.88011e+06	3.76216e+06	7.26597e+06	5.1778e+06	8.00199e+06	4.65038e+06	2.98497e+06	5.37097e+06	4.26884e+06	4.16851e+06	6.03958e+06	5.46286e+06	8.66505e+06	3.94315e+06
P20459	16	16	1279.09	34981	Eukaryotic translation initiation factor 2 subunit alpha OS=Saccharomyces cerevisiae (strain ATCC 204508 / S288c) GN=SUI2 PE=1 SV=1	1.40126e+07	1.33477e+07	1.31895e+07	1.34372e+07	1.12518e+07	1.14669e+07	9.867e+06	1.20263e+07	1.1792e+07	1.65112e+07	1.45109e+07	1.48885e+07	9.35268e+06	1.20982e+07	1.06846e+07	1.01973e+07
P41903	2	2	44.76	40291	Peroxisomal acyl-coenzyme A thioester hydrolase 1 OS=Saccharomyces cerevisiae (strain ATCC 204508 / S288c) GN=TES1 PE=1 SV=1	380738	179099	167029	148751	646179	713146	485454	556718	320402	221547	183763	164818	537114	752408	525680	472053
P06780	8	8	789.32	23537	GTP-binding protein RHO1 OS=Saccharomyces cerevisiae (strain ATCC 204508 / S288c) GN=RHO1 PE=1 SV=3	1.90654e+07	1.9115e+07	1.85025e+07	1.76141e+07	2.67282e+07	2.34181e+07	2.37689e+07	2.45007e+07	1.60441e+07	2.36453e+07	2.03562e+07	1.95165e+07	2.22169e+07	2.47074e+07	2.57385e+07	2.07746e+07
P47122	10	10	684.17	43509	GPN-loop GTPase 1 OS=Saccharomyces cerevisiae (strain ATCC 204508 / S288c) GN=NPA3 PE=1 SV=1	3.73306e+06	3.80651e+06	4.02064e+06	4.3969e+06	2.55163e+06	3.00645e+06	2.76456e+06	3.67861e+06	3.14148e+06	4.70867e+06	4.42345e+06	4.87181e+06	2.12095e+06	3.17197e+06	2.99363e+06	3.11917e+06
P38615	3	3	154.93	43376	Serine/threonine-protein kinase RIM11/MSD1 OS=Saccharomyces cerevisiae (strain ATCC 204508 / S288c) GN=RIM11 PE=1 SV=1	269487	476006	452636	530308	558532	632361	636951	597142	226781	588822	497984	587586	464260	667176	689730	506329
P32599	25	25	2015.06	71957	Fimbrin OS=Saccharomyces cerevisiae (strain ATCC 204508 / S288c) GN=SAC6 PE=1 SV=1	2.41873e+07	2.48327e+07	2.05115e+07	2.01426e+07	3.53263e+07	3.319e+07	3.19705e+07	2.91897e+07	2.03544e+07	3.07181e+07	2.25665e+07	2.23182e+07	2.93638e+07	3.50173e+07	3.46196e+07	2.47506e+07
P54114	9	2	458.69	55693	Aldehyde dehydrogenase [NAD(P)+] 2 OS=Saccharomyces cerevisiae (strain ATCC 204508 / S288c) GN=ALD3 PE=1 SV=1	117621	200544	138406	125333	730580	229729	255689	276352	98981.7	248073	152272	138870	607269	242377	276876	234325
P53836	3	2	92.58	118720	CCR4-NOT transcriptional complex subunit CAF120 OS=Saccharomyces cerevisiae (strain ATCC 204508 / S288c) GN=CAF120 PE=1 SV=1	39819	34401.7	33161.7	87241	209121	166575	153112	188444	33508.9	42555.1	36484.1	96663.7	173824	175745	165800	159785
P38064	3	3	145.76	26615	54S ribosomal protein L16, mitochondrial OS=Saccharomyces cerevisiae (strain ATCC 204508 / S288c) GN=MRPL16 PE=1 SV=1	39438.9	53250.2	81831.3	39025.3	141140	166361	225355	193926	33189	65870.8	90029.6	43240.3	117318	175520	244028	164434
Q03233	2	2	61.65	22552	Alpha1-proteinase inhibitor-degradation deficient protein 37 OS=Saccharomyces cerevisiae (strain ATCC 204508 / S288c) GN=ADD37 PE=1 SV=1	396760	378419	238401	310136	629321	651312	612290	690229	333885	468106	262285	343633	523101	687170	663026	585260
Q10740	10	10	702.24	77646	Leukotriene A-4 hydrolase homolog OS=Saccharomyces cerevisiae (strain ATCC 204508 / S288c) GN=LAP2 PE=1 SV=1	4.08524e+06	4.19059e+06	3.65082e+06	3.62193e+06	4.09458e+06	4.51716e+06	4.0244e+06	4.86429e+06	3.43786e+06	5.18378e+06	4.01658e+06	4.01313e+06	3.40347e+06	4.76585e+06	4.35787e+06	4.12453e+06
Q05506	35	34	2001.69	69652	Arginine--tRNA ligase, cytoplasmic OS=Saccharomyces cerevisiae (strain ATCC 204508 / S288c) GN=YDR341C PE=1 SV=1	2.11044e+07	1.89874e+07	2.13e+07	2.01873e+07	1.61862e+07	1.88313e+07	1.66914e+07	1.84937e+07	1.776e+07	2.34875e+07	2.34339e+07	2.23677e+07	1.34542e+07	1.98681e+07	1.80745e+07	1.56812e+07
P43638	12	11	596.03	155967	MAP-homologous protein 1 OS=Saccharomyces cerevisiae (strain ATCC 204508 / S288c) GN=MHP1 PE=1 SV=1	593802	606650	733260	729614	1.07013e+06	999519	866045	860642	499702	750429	806722	808419	889506	1.05455e+06	937808	729756
P06634	36	28	3043.94	65741	ATP-dependent RNA helicase DED1 OS=Saccharomyces cerevisiae (strain ATCC 204508 / S288c) GN=DED1 PE=1 SV=2	7.34967e+07	8.16492e+07	8.68298e+07	7.60603e+07	5.27898e+07	6.17962e+07	6.46421e+07	6.97292e+07	6.18497e+07	1.01e+08	9.55289e+07	8.42755e+07	4.38797e+07	6.51983e+07	6.99985e+07	5.91248e+07
P50106	3	3	178.25	14576	DNA-directed RNA polymerase I subunit RPA14 OS=Saccharomyces cerevisiae (strain ATCC 204508 / S288c) GN=RPA14 PE=1 SV=1	1.00582e+06	1.29337e+06	1.18556e+06	1.2467e+06	631402	670664	880386	892050	846425	1.59991e+06	1.30433e+06	1.38135e+06	524831	707587	953337	756388
P0C0X0	4	4	280.55	7560	40S ribosomal protein S28-B OS=Saccharomyces cerevisiae (strain ATCC 204508 / S288c) GN=RPS28B PE=1 SV=1	8.32116e+07	9.38991e+07	9.58027e+07	1.08316e+08	6.48973e+07	7.57226e+07	7.04959e+07	8.09018e+07	7.00251e+07	1.16154e+08	1.05401e+08	1.20015e+08	5.39436e+07	7.98914e+07	7.63374e+07	6.85983e+07
P38130	8	8	461.7	47851	Probable mannosyltransferase KTR3 OS=Saccharomyces cerevisiae (strain ATCC 204508 / S288c) GN=KTR3 PE=1 SV=1	4.97367e+06	5.5953e+06	5.14045e+06	6.32442e+06	6.28747e+06	8.06398e+06	7.37975e+06	7.6434e+06	4.18549e+06	6.92142e+06	5.65545e+06	7.00751e+06	5.22624e+06	8.50794e+06	7.99125e+06	6.481e+06
P32864	10	10	664.45	67788	Rab proteins geranylgeranyltransferase component A OS=Saccharomyces cerevisiae (strain ATCC 204508 / S288c) GN=MRS6 PE=1 SV=2	1.44729e+06	1.55844e+06	1.69246e+06	1.65396e+06	2.05448e+06	2.22945e+06	2.199e+06	2.48621e+06	1.21794e+06	1.9278e+06	1.86202e+06	1.8326e+06	1.70771e+06	2.3522e+06	2.38122e+06	2.10811e+06
Q02792	7	6	382.99	116431	5'-3' exoribonuclease 2 OS=Saccharomyces cerevisiae (strain ATCC 204508 / S288c) GN=RAT1 PE=1 SV=3	1.23902e+06	1.23023e+06	1.3388e+06	1.2347e+06	714723	931496	778103	1.22331e+06	1.04267e+06	1.5218e+06	1.47293e+06	1.36806e+06	594088	982779	842579	1.03727e+06
P04076	7	7	631.16	52184	Argininosuccinate lyase OS=Saccharomyces cerevisiae (strain ATCC 204508 / S288c) GN=ARG4 PE=1 SV=2	809220	629819	625476	713007	951656	975678	986210	1.07413e+06	680983	779089	688140	790018	791031	1.02939e+06	1.06793e+06	910775
Q04177	7	6	378.14	72356	U3 small nucleolar RNA-associated protein 5 OS=Saccharomyces cerevisiae (strain ATCC 204508 / S288c) GN=UTP5 PE=1 SV=1	1.05254e+06	1.47173e+06	1.49987e+06	1.79978e+06	763241	657712	811224	965054	885746	1.82054e+06	1.65013e+06	1.99417e+06	634417	693922	878444	818289
P10356	2	2	157.83	49801	Uncharacterized protein YER152C OS=Saccharomyces cerevisiae (strain ATCC 204508 / S288c) GN=YER152C PE=1 SV=2	628704	688616	497594	702905	1.00078e+06	995291	944439	1.04371e+06	529073	851821	547445	778825	831863	1.05009e+06	1.0227e+06	884980
P53874	6	6	249.11	88933	Ubiquitin carboxyl-terminal hydrolase 10 OS=Saccharomyces cerevisiae (strain ATCC 204508 / S288c) GN=UBP10 PE=1 SV=2	235642	268330	224727	324542	148228	161107	140602	175908	198300	331926	247242	359595	123209	169977	152253	149156
P53049	7	7	528.41	167591	Oligomycin resistance ATP-dependent permease YOR1 OS=Saccharomyces cerevisiae (strain ATCC 204508 / S288c) GN=YOR1 PE=1 SV=1	486303	456497	508366	450994	309304	309959	369130	408015	409239	564689	559297	499704	257098	327024	399717	345965
P06182	2	2	116.74	30289	Cytochrome c heme lyase OS=Saccharomyces cerevisiae (strain ATCC 204508 / S288c) GN=CYC3 PE=1 SV=1	222603	46365.3	81225.3	75784.3	733712	569156	542007	499640	187327	57354.1	89362.9	83969.6	609872	600490	586919	423655
P39101	11	11	957.77	44884	Protein CAJ1 OS=Saccharomyces cerevisiae (strain ATCC 204508 / S288c) GN=CAJ1 PE=1 SV=1	4.88795e+06	5.57737e+06	5.10037e+06	5.46658e+06	6.83136e+06	6.30907e+06	6.18259e+06	6.79018e+06	4.11336e+06	6.89923e+06	5.61135e+06	6.05701e+06	5.67833e+06	6.65641e+06	6.69489e+06	5.75753e+06
P38297	3	3	103.93	98089	Mitofusin FZO1 OS=Saccharomyces cerevisiae (strain ATCC 204508 / S288c) GN=FZO1 PE=1 SV=1	409277	443903	399654	676670	835706	688468	692248	829330	344419	549110	439694	749756	694652	726372	749609	703206
Q08746	7	6	503.24	22949	Regulator of ribosome biosynthesis OS=Saccharomyces cerevisiae (strain ATCC 204508 / S288c) GN=RRS1 PE=1 SV=1	4.59051e+06	4.75016e+06	5.66326e+06	4.22865e+06	2.17339e+06	2.94471e+06	3.51446e+06	3.81612e+06	3.86305e+06	5.87597e+06	6.23063e+06	4.68538e+06	1.80656e+06	3.10683e+06	3.80568e+06	3.23577e+06
Q06494	5	5	282.79	38862	Putative pyridoxal reductase OS=Saccharomyces cerevisiae (strain ATCC 204508 / S288c) GN=YPR127W PE=1 SV=1	1.11209e+06	866443	925419	1.05718e+06	1.91836e+06	1.55755e+06	1.38467e+06	1.37609e+06	935855	1.07179e+06	1.01813e+06	1.17137e+06	1.59457e+06	1.6433e+06	1.49941e+06	1.16682e+06
Q06493	5	4	256.38	52256	LETM1 domain-containing protein YLH47, mitochondrial OS=Saccharomyces cerevisiae (strain ATCC 204508 / S288c) GN=YLH47 PE=1 SV=1	941931	949626	1.01668e+06	1.02162e+06	816231	683630	779910	716374	792663	1.17469e+06	1.11853e+06	1.13196e+06	678464	721267	844535	607429
P33201	11	11	806.28	27155	Ribosome assembly factor MRT4 OS=Saccharomyces cerevisiae (strain ATCC 204508 / S288c) GN=MRT4 PE=1 SV=1	1.23954e+07	1.30493e+07	1.61611e+07	1.36992e+07	7.52226e+06	9.5761e+06	8.93255e+06	1.11022e+07	1.04311e+07	1.6142e+07	1.77802e+07	1.51788e+07	6.25261e+06	1.01033e+07	9.67272e+06	9.41374e+06
P40989	31	4	1930.91	218675	1,3-beta-glucan synthase component GSC2 OS=Saccharomyces cerevisiae (strain ATCC 204508 / S288c) GN=GSC2 PE=1 SV=2	1.09688e+06	1.28165e+06	1.04756e+06	901562	1.91314e+06	1.61851e+06	1.41495e+06	2.01051e+06	923057	1.5854e+06	1.15251e+06	998938	1.59023e+06	1.70762e+06	1.5322e+06	1.70475e+06
P53860	6	6	327.52	40802	Phosphatidylinositol transfer protein PDR16 OS=Saccharomyces cerevisiae (strain ATCC 204508 / S288c) GN=PDR16 PE=1 SV=1	2.08664e+06	2.1031e+06	1.86601e+06	1.92989e+06	1.52733e+06	1.83981e+06	1.69663e+06	1.70183e+06	1.75597e+06	2.60155e+06	2.05296e+06	2.13833e+06	1.26954e+06	1.9411e+06	1.83722e+06	1.44302e+06
P53107	5	5	228.59	50266	Ran-specific GTPase-activating protein 30 OS=Saccharomyces cerevisiae (strain ATCC 204508 / S288c) GN=YRB30 PE=1 SV=1	236000	230416	190147	201000	339582	305015	318911	282560	198601	285026	209197	222710	282265	321808	345336	239588
Q05788	9	9	531.46	34018	Purine nucleoside phosphorylase OS=Saccharomyces cerevisiae (strain ATCC 204508 / S288c) GN=PNP1 PE=1 SV=1	1.31453e+06	1.36166e+06	1.57251e+06	1.70796e+06	2.03287e+06	2.27232e+06	2.06966e+06	2.05501e+06	1.10622e+06	1.68438e+06	1.73006e+06	1.89244e+06	1.68975e+06	2.39742e+06	2.24116e+06	1.74248e+06
P41057	5	4	482.85	6884	40S ribosomal protein S29-A OS=Saccharomyces cerevisiae (strain ATCC 204508 / S288c) GN=RPS29A PE=1 SV=3	3.42354e+07	3.48347e+07	3.44201e+07	3.47564e+07	2.69137e+07	3.04564e+07	3.02039e+07	3.03404e+07	2.88102e+07	4.30907e+07	3.78685e+07	3.85104e+07	2.23711e+07	3.21332e+07	3.27066e+07	2.57263e+07
P14904	9	9	760.13	57342	Vacuolar aminopeptidase 1 OS=Saccharomyces cerevisiae (strain ATCC 204508 / S288c) GN=APE1 PE=1 SV=2	4.40288e+06	5.9738e+06	6.18106e+06	5.12501e+06	1.15617e+07	8.17153e+06	8.0365e+06	7.24329e+06	3.70516e+06	7.38961e+06	6.80031e+06	5.67855e+06	9.61027e+06	8.62141e+06	8.70243e+06	6.14174e+06
P31539	43	41	2939.02	102314	Heat shock protein 104 OS=Saccharomyces cerevisiae (strain ATCC 204508 / S288c) GN=HSP104 PE=1 SV=2	2.15618e+07	2.36422e+07	2.16309e+07	2.2642e+07	2.54702e+07	2.35349e+07	2.14273e+07	2.51646e+07	1.81449e+07	2.92455e+07	2.3798e+07	2.50875e+07	2.11712e+07	2.48306e+07	2.32028e+07	2.13376e+07
P00950	16	16	1510.04	27592	Phosphoglycerate mutase 1 OS=Saccharomyces cerevisiae (strain ATCC 204508 / S288c) GN=GPM1 PE=1 SV=3	4.74501e+08	6.0263e+08	6.12975e+08	6.1235e+08	3.71266e+08	3.96371e+08	3.51574e+08	3.83216e+08	3.99307e+08	7.45456e+08	6.74386e+08	6.78488e+08	3.08602e+08	4.18193e+08	3.80707e+08	3.24936e+08
P0C5R9	2	2	48.93	9526	Uncharacterized protein YPR170W-B OS=Saccharomyces cerevisiae (strain ATCC 204508 / S288c) GN=YPR170W-B PE=3 SV=1	277848	286407	286096	276496	261466	243671	228837	257648	233817	354287	314758	306360	217335	257087	247799	218465
Q12359	2	2	226.85	30522	Ammonia transport outward protein 3 OS=Saccharomyces cerevisiae (strain ATCC 204508 / S288c) GN=ATO3 PE=1 SV=1	2.45363e+06	2.52502e+06	2.38258e+06	1.9813e+06	3.13392e+06	3.02067e+06	2.71841e+06	2.96124e+06	2.0648e+06	3.12346e+06	2.62128e+06	2.1953e+06	2.60496e+06	3.18697e+06	2.94367e+06	2.5109e+06
P43597	10	10	622.1	137844	Uncharacterized protein YFR016C OS=Saccharomyces cerevisiae (strain ATCC 204508 / S288c) GN=YFR016C PE=1 SV=1	1.05768e+06	1.11823e+06	1.05605e+06	1.20017e+06	1.57193e+06	1.5295e+06	1.24731e+06	1.7303e+06	890069	1.38326e+06	1.16185e+06	1.3298e+06	1.30661e+06	1.6137e+06	1.35066e+06	1.46715e+06
Q86ZR7	4	4	177.92	26382	Putative uncharacterized hydrolase YKL033W-A OS=Saccharomyces cerevisiae (strain ATCC 204508 / S288c) GN=YKL033W-A PE=1 SV=2	2.50477e+06	2.50104e+06	2.62998e+06	2.51252e+06	3.54772e+06	3.03637e+06	3.14418e+06	3.0138e+06	2.10784e+06	3.09379e+06	2.89347e+06	2.7839e+06	2.94891e+06	3.20353e+06	3.40472e+06	2.55546e+06
Q12255	2	2	53.74	29117	Vacuolar v-SNARE NYV1 OS=Saccharomyces cerevisiae (strain ATCC 204508 / S288c) GN=NYV1 PE=1 SV=2	427443	267874	280820	349316	1.25587e+06	727379	819086	558026	359706	331361	308954	387044	1.0439e+06	767424	886957	473162
Q12692	4	3	201.82	14274	Histone H2A.Z OS=Saccharomyces cerevisiae (strain ATCC 204508 / S288c) GN=HTZ1 PE=1 SV=3	3.30539e+06	3.08363e+06	3.318e+06	3.01021e+06	4.51014e+06	4.2317e+06	4.40894e+06	4.3088e+06	2.78158e+06	3.81447e+06	3.65042e+06	3.33534e+06	3.74889e+06	4.46467e+06	4.77428e+06	3.65352e+06
P25491	18	18	1238.13	45270	Mitochondrial protein import protein MAS5 OS=Saccharomyces cerevisiae (strain ATCC 204508 / S288c) GN=YDJ1 PE=1 SV=1	3.91599e+07	4.46396e+07	3.68888e+07	4.50903e+07	2.31641e+07	2.64601e+07	2.74508e+07	3.52421e+07	3.29543e+07	5.52194e+07	4.05845e+07	4.99604e+07	1.92544e+07	2.79168e+07	2.97255e+07	2.98825e+07
Q04373	8	8	366.72	75344	Pumilio homology domain family member 6 OS=Saccharomyces cerevisiae (strain ATCC 204508 / S288c) GN=PUF6 PE=1 SV=1	2.23267e+06	2.65185e+06	2.84673e+06	2.18293e+06	1.02475e+06	1.45455e+06	1.67415e+06	1.29318e+06	1.87886e+06	3.28035e+06	3.13193e+06	2.41871e+06	851785	1.53463e+06	1.81287e+06	1.09652e+06
Q02933	2	2	85.15	50824	Ribonuclease T2-like OS=Saccharomyces cerevisiae (strain ATCC 204508 / S288c) GN=RNY1 PE=1 SV=1	149796	200659	221908	290409	462730	436136	366347	470018	126058	248216	244140	321776	384628	460148	396704	398538
P47159	2	2	74.24	50258	Uncharacterized membrane protein YJR124C OS=Saccharomyces cerevisiae (strain ATCC 204508 / S288c) GN=YJR124C PE=1 SV=1	173091	148215	152563	185515	100926	133393	133847	137237	145661	183343	167848	205552	83891.2	140737	144938	116366
P53315	2	2	181.12	28772	6-phosphogluconolactonase 4 OS=Saccharomyces cerevisiae (strain ATCC 204508 / S288c) GN=SOL4 PE=1 SV=1	277400	432131	142324	496536	1.22215e+06	659374	677730	658728	233441	534549	156583	550166	1.01587e+06	695675	733888	558549
P38205	25	24	1621.17	78628	Multisite-specific tRNA:(cytosine-C(5))-methyltransferase OS=Saccharomyces cerevisiae (strain ATCC 204508 / S288c) GN=NCL1 PE=1 SV=1	1.33549e+07	1.30418e+07	1.40569e+07	1.40148e+07	1.07183e+07	1.08863e+07	1.16192e+07	1.13923e+07	1.12386e+07	1.61328e+07	1.54652e+07	1.55286e+07	8.90922e+06	1.14857e+07	1.25819e+07	9.65981e+06
P48237	2	2	115.06	101871	Mitochondrial group I intron splicing factor CCM1 OS=Saccharomyces cerevisiae (strain ATCC 204508 / S288c) GN=CCM1 PE=1 SV=1	88114.7	23158.1	116478	126420	423866	388988	303125	367798	74151.2	28646.7	128148	140074	352324	410403	328243	311864
P38966	4	3	220.91	99449	Uncharacterized protein YDR089W OS=Saccharomyces cerevisiae (strain ATCC 204508 / S288c) GN=YDR089W PE=1 SV=2	311421	366695	331134	347266	216404	243496	265433	296593	262070	453603	364308	384774	179878	256901	287428	251487
P22146	14	14	1309.52	60343	1,3-beta-glucanosyltransferase GAS1 OS=Saccharomyces cerevisiae (strain ATCC 204508 / S288c) GN=GAS1 PE=1 SV=2	5.71251e+07	5.44057e+07	6.40468e+07	5.686e+07	7.12955e+07	7.5093e+07	6.15545e+07	8.01023e+07	4.80725e+07	6.73002e+07	7.04634e+07	6.30014e+07	5.92619e+07	7.92272e+07	6.6655e+07	6.79204e+07
P00549	55	52	6239.23	54909	Pyruvate kinase 1 OS=Saccharomyces cerevisiae (strain ATCC 204508 / S288c) GN=CDC19 PE=1 SV=2	1.65802e+09	1.5064e+09	1.67873e+09	1.4616e+09	1.20223e+09	1.31577e+09	1.327e+09	1.36456e+09	1.39527e+09	1.86343e+09	1.84692e+09	1.61947e+09	9.99315e+08	1.3882e+09	1.43696e+09	1.15703e+09
P49435	5	5	252.7	20631	Adenine phosphoribosyltransferase 1 OS=Saccharomyces cerevisiae (strain ATCC 204508 / S288c) GN=APT1 PE=1 SV=3	7.82073e+06	7.02424e+06	7.73661e+06	7.18616e+06	9.5376e+06	9.81931e+06	9.37074e+06	9.71997e+06	6.58138e+06	8.68902e+06	8.5117e+06	7.96232e+06	7.9278e+06	1.03599e+07	1.01472e+07	8.24176e+06
P22202	18	4	2026.05	69723	Heat shock protein SSA4 OS=Saccharomyces cerevisiae (strain ATCC 204508 / S288c) GN=SSA4 PE=1 SV=3	2.78195e+06	2.89961e+06	2.89126e+06	1.9506e+06	1.311e+06	1.23607e+06	1.16913e+06	1.74474e+06	2.34109e+06	3.58683e+06	3.18092e+06	2.16129e+06	1.08973e+06	1.30412e+06	1.266e+06	1.4794e+06
P18899	10	10	1390.93	46207	Stress protein DDR48 OS=Saccharomyces cerevisiae (strain ATCC 204508 / S288c) GN=DDR48 PE=1 SV=4	5.06513e+06	7.06321e+06	1.0062e+07	5.75926e+06	9.75074e+06	8.45351e+06	7.93341e+06	8.65231e+06	4.26246e+06	8.73723e+06	1.107e+07	6.38131e+06	8.10496e+06	8.91891e+06	8.59079e+06	7.33647e+06
Q02354	7	7	251.38	52670	U3 small nucleolar RNA-associated protein 6 OS=Saccharomyces cerevisiae (strain ATCC 204508 / S288c) GN=UTP6 PE=1 SV=2	1.16398e+06	1.21388e+06	1.25225e+06	1.32675e+06	623357	797654	819193	927566	979522	1.50158e+06	1.37771e+06	1.47005e+06	518144	841568	887073	786502
P07703	14	14	1244.1	37948	DNA-directed RNA polymerases I and III subunit RPAC1 OS=Saccharomyces cerevisiae (strain ATCC 204508 / S288c) GN=RPC40 PE=1 SV=1	1.2614e+07	1.6816e+07	1.50044e+07	1.50969e+07	9.15717e+06	1.14512e+07	1.08071e+07	1.17756e+07	1.06151e+07	2.08014e+07	1.65077e+07	1.67274e+07	7.61158e+06	1.20817e+07	1.17026e+07	9.9848e+06
P25573	5	5	300.62	47184	Mitochondrial inner membrane i-AAA protease supercomplex subunit MGR1 OS=Saccharomyces cerevisiae (strain ATCC 204508 / S288c) GN=MGR1 PE=1 SV=1	793206	708251	589978	654352	1.12212e+06	1.08801e+06	1.04225e+06	1.32737e+06	667507	876109	649085	725027	932726	1.14791e+06	1.12862e+06	1.12551e+06
P52918	7	5	451.39	143338	Protein MSN5 OS=Saccharomyces cerevisiae (strain ATCC 204508 / S288c) GN=MSN5 PE=1 SV=1	603187	659645	617699	672418	863968	803717	672134	774905	507600	815984	679583	745044	718144	847965	727829	657057
P0CX45	17	16	2036.08	27392	60S ribosomal protein L2-A OS=Saccharomyces cerevisiae (strain ATCC 204508 / S288c) GN=RPL2A PE=1 SV=1	3.54941e+08	4.14193e+08	3.84194e+08	4.14594e+08	3.08707e+08	3.17078e+08	3.01342e+08	3.32558e+08	2.98694e+08	5.12358e+08	4.22685e+08	4.59373e+08	2.56602e+08	3.34534e+08	3.26312e+08	2.81983e+08
Q04410	9	9	604.61	41379	GRASP65 homolog protein 1 OS=Saccharomyces cerevisiae (strain ATCC 204508 / S288c) GN=GRH1 PE=1 SV=1	3.68762e+06	4.17125e+06	2.66072e+06	3.02912e+06	5.98182e+06	6.45283e+06	6.58208e+06	5.16923e+06	3.10325e+06	5.15986e+06	2.92728e+06	3.35629e+06	4.97218e+06	6.80809e+06	7.12749e+06	4.38309e+06
P38074	8	8	591.07	39932	Protein arginine N-methyltransferase 1 OS=Saccharomyces cerevisiae (strain ATCC 204508 / S288c) GN=HMT1 PE=1 SV=1	4.63461e+06	6.35474e+06	6.41089e+06	5.6427e+06	3.5885e+06	4.35842e+06	4.28653e+06	4.50096e+06	3.90017e+06	7.86085e+06	7.05317e+06	6.25216e+06	2.98282e+06	4.59837e+06	4.64172e+06	3.81646e+06
P25628	3	3	206.19	72250	Sterol O-acyltransferase 1 OS=Saccharomyces cerevisiae (strain ATCC 204508 / S288c) GN=ARE1 PE=1 SV=1	329752	401203	256216	399906	136516	192254	118357	218029	277496	496289	281885	443099	113474	202838	128165	184871
P38085	2	2	80.66	69512	Valine/tyrosine/tryptophan amino-acid permease 1 OS=Saccharomyces cerevisiae (strain ATCC 204508 / S288c) GN=TAT1 PE=1 SV=1	357038	455354	338753	329879	210861	173947	115747	161661	300458	563275	372691	365509	175271	183524	125338	137075
P25627	2	2	133.58	30951	18S rRNA (guanine(1575)-N(7))-methyltransferase OS=Saccharomyces cerevisiae (strain ATCC 204508 / S288c) GN=BUD23 PE=1 SV=1	299520	566603	490046	507493	402144	498549	376620	294961	252055	700891	539142	562306	334268	525997	407827	250103
P47068	28	26	2151.27	128218	Myosin tail region-interacting protein MTI1 OS=Saccharomyces cerevisiae (strain ATCC 204508 / S288c) GN=BBC1 PE=1 SV=2	5.08705e+06	5.94377e+06	5.98611e+06	6.34959e+06	1.0258e+07	9.58285e+06	8.70913e+06	6.42712e+06	4.2809e+06	7.35247e+06	6.58583e+06	7.03539e+06	8.52661e+06	1.01104e+07	9.43078e+06	5.44969e+06
P53313	12	11	748	87020	Protein SDA1 OS=Saccharomyces cerevisiae (strain ATCC 204508 / S288c) GN=SDA1 PE=1 SV=1	3.59741e+06	3.48435e+06	3.31324e+06	2.97896e+06	1.50403e+06	1.93241e+06	1.82332e+06	2.77446e+06	3.02733e+06	4.31015e+06	3.64518e+06	3.30071e+06	1.25017e+06	2.0388e+06	1.9744e+06	2.35252e+06
Q02256	9	9	692.71	41672	Tyrosine-protein phosphatase YVH1 OS=Saccharomyces cerevisiae (strain ATCC 204508 / S288c) GN=YVH1 PE=1 SV=1	2.53846e+06	2.39502e+06	2.83914e+06	2.70971e+06	1.37565e+06	1.53697e+06	1.66146e+06	2.08848e+06	2.13619e+06	2.96266e+06	3.12358e+06	3.00238e+06	1.14346e+06	1.62159e+06	1.79914e+06	1.77086e+06
P05317	16	16	1532.12	33696	60S acidic ribosomal protein P0 OS=Saccharomyces cerevisiae (strain ATCC 204508 / S288c) GN=RPP0 PE=1 SV=2	2.04454e+08	2.20478e+08	2.29439e+08	2.17538e+08	1.56784e+08	1.83146e+08	1.78129e+08	2.00432e+08	1.72054e+08	2.72733e+08	2.52425e+08	2.41034e+08	1.30321e+08	1.93229e+08	1.92889e+08	1.69951e+08
P38788	30	29	2797.21	58316	Ribosome-associated complex subunit SSZ1 OS=Saccharomyces cerevisiae (strain ATCC 204508 / S288c) GN=SSZ1 PE=1 SV=2	9.77413e+07	1.18946e+08	1.03464e+08	1.1234e+08	6.66146e+07	8.13581e+07	7.82663e+07	8.54365e+07	8.22522e+07	1.47136e+08	1.13829e+08	1.24474e+08	5.53711e+07	8.58372e+07	8.47516e+07	7.24434e+07
P53252	16	14	1698.62	38326	Sphingolipid long chain base-responsive protein PIL1 OS=Saccharomyces cerevisiae (strain ATCC 204508 / S288c) GN=PIL1 PE=1 SV=1	5.29733e+07	6.21097e+07	6.47692e+07	6.21619e+07	8.55383e+07	7.43404e+07	7.31427e+07	6.87043e+07	4.45786e+07	7.683e+07	7.12581e+07	6.88759e+07	7.11008e+07	7.84332e+07	7.92035e+07	5.82558e+07
P53893	12	11	548.19	125355	Ribosome assembly protein 1 OS=Saccharomyces cerevisiae (strain ATCC 204508 / S288c) GN=RIA1 PE=1 SV=1	2.02864e+06	1.98233e+06	1.9141e+06	1.88561e+06	1.59788e+06	1.40111e+06	1.68016e+06	1.64492e+06	1.70716e+06	2.45215e+06	2.10586e+06	2.08927e+06	1.32818e+06	1.47825e+06	1.81938e+06	1.39476e+06
P53729	5	5	363.43	48491	Uncharacterized protein YNR029C OS=Saccharomyces cerevisiae (strain ATCC 204508 / S288c) GN=YNR029C PE=1 SV=1	741384	685326	695282	660960	937177	849338	952733	971631	623897	847752	764939	732349	778996	896098	1.03168e+06	823866
P50896	7	6	321.36	95574	Protein PSP1 OS=Saccharomyces cerevisiae (strain ATCC 204508 / S288c) GN=PSP1 PE=1 SV=2	990564	1.17187e+06	993409	971578	1.9237e+06	1.83842e+06	2.11365e+06	2.13456e+06	833590	1.44961e+06	1.09293e+06	1.07652e+06	1.59901e+06	1.93964e+06	2.2888e+06	1.80994e+06
P40086	6	6	228.89	54794	Cytochrome c oxidase assembly protein COX15 OS=Saccharomyces cerevisiae (strain ATCC 204508 / S288c) GN=COX15 PE=1 SV=1	1.07618e+06	886283	977788	954520	2.30309e+06	1.92974e+06	1.7842e+06	1.38717e+06	905640	1.09634e+06	1.07575e+06	1.05762e+06	1.91436e+06	2.03598e+06	1.93204e+06	1.17621e+06
P47025	4	3	259.14	80439	Mitochondrial division protein 1 OS=Saccharomyces cerevisiae (strain ATCC 204508 / S288c) GN=MDV1 PE=1 SV=1	73851.9	130024	124527	162610	308263	293652	272686	288439	62148.6	160840	137003	180173	256232	309818	295281	244573
Q12743	3	3	269.94	38391	DER1-like family member protein 1 OS=Saccharomyces cerevisiae (strain ATCC 204508 / S288c) GN=DFM1 PE=1 SV=1	1.74146e+06	1.91321e+06	1.7947e+06	1.98944e+06	2.44141e+06	2.41691e+06	2.34111e+06	2.0606e+06	1.46549e+06	2.36665e+06	1.9745e+06	2.20431e+06	2.02933e+06	2.54997e+06	2.5351e+06	1.74723e+06
Q02979	6	6	297.64	138726	Glycerophosphodiester phosphodiesterase GDE1 OS=Saccharomyces cerevisiae (strain ATCC 204508 / S288c) GN=GDE1 PE=1 SV=1	501639	792812	594994	588812	901687	815421	936806	971433	422145	980712	654603	652408	749496	860313	1.01443e+06	823698
P22108	4	4	293.11	37273	5',5'''-P-1,P-4-tetraphosphate phosphorylase 2 OS=Saccharomyces cerevisiae (strain ATCC 204508 / S288c) GN=APA2 PE=1 SV=1	726959	389973	911876	510367	1.66589e+06	1.4714e+06	1.50715e+06	1.41334e+06	611758	482398	1.00323e+06	565491	1.38471e+06	1.55241e+06	1.63204e+06	1.1984e+06
Q01476	15	15	711.88	147005	Ubiquitin carboxyl-terminal hydrolase 2 OS=Saccharomyces cerevisiae (strain ATCC 204508 / S288c) GN=UBP2 PE=1 SV=2	1.36905e+06	1.08262e+06	1.16982e+06	1.39914e+06	1.9677e+06	1.59982e+06	1.69716e+06	1.76318e+06	1.15209e+06	1.3392e+06	1.28702e+06	1.55026e+06	1.63558e+06	1.6879e+06	1.83779e+06	1.49504e+06
P53189	2	2	126.68	56754	Probable family 17 glucosidase SCW11 OS=Saccharomyces cerevisiae (strain ATCC 204508 / S288c) GN=SCW11 PE=1 SV=1	453967	499563	425692	416439	598617	385003	504679	482858	382027	617962	468340	461418	497580	406199	546498	409425
P48365	3	3	148.53	87764	GTPase-activating protein GYP7 OS=Saccharomyces cerevisiae (strain ATCC 204508 / S288c) GN=GYP7 PE=1 SV=1	132026	117584	100733	114592	185234	220400	199695	270601	111104	145451	110825	126969	153970	232534	216243	229448
P23369	2	2	73.38	18575	54S ribosomal protein L25, mitochondrial OS=Saccharomyces cerevisiae (strain ATCC 204508 / S288c) GN=MRPL25 PE=1 SV=2	301241	661160	411826	437506	947551	1.05672e+06	1.08881e+06	836350	253504	817858	453085	484760	787619	1.1149e+06	1.17903e+06	709159
P25039	11	11	568.82	85090	Elongation factor G, mitochondrial OS=Saccharomyces cerevisiae (strain ATCC 204508 / S288c) GN=MEF1 PE=1 SV=2	883313	1.38648e+06	952839	1.34898e+06	2.49984e+06	2.59191e+06	2.58556e+06	2.17745e+06	743335	1.71509e+06	1.0483e+06	1.49468e+06	2.0779e+06	2.73461e+06	2.79981e+06	1.8463e+06
P33311	5	5	195.71	85711	ATP-dependent permease MDL2, mitochondrial OS=Saccharomyces cerevisiae (strain ATCC 204508 / S288c) GN=MDL2 PE=1 SV=3	401553	542309	526065	634243	795255	815037	794144	894633	337919	670839	578769	702746	661028	859908	859948	758577
P20081	6	6	600.55	12207	FK506-binding protein 1 OS=Saccharomyces cerevisiae (strain ATCC 204508 / S288c) GN=FPR1 PE=1 SV=2	2.51871e+07	4.04002e+07	4.14108e+07	3.93782e+07	6.26582e+07	5.98902e+07	6.19742e+07	6.66412e+07	2.11957e+07	4.99752e+07	4.55595e+07	4.36313e+07	5.20824e+07	6.31874e+07	6.71095e+07	5.65065e+07
P54115	39	39	4671.9	54779	Magnesium-activated aldehyde dehydrogenase, cytosolic OS=Saccharomyces cerevisiae (strain ATCC 204508 / S288c) GN=ALD6 PE=1 SV=4	2.07214e+08	2.4201e+08	2.31837e+08	2.42687e+08	1.4907e+08	1.67547e+08	1.6366e+08	1.7188e+08	1.74377e+08	2.99367e+08	2.55063e+08	2.68899e+08	1.23909e+08	1.76771e+08	1.77222e+08	1.45741e+08
Q12191	4	4	306.77	38272	Binder of USO1 and GRH1 protein 1 OS=Saccharomyces cerevisiae (strain ATCC 204508 / S288c) GN=BUG1 PE=1 SV=1	2.24792e+06	2.45151e+06	2.18467e+06	2.85991e+06	3.06567e+06	3.91284e+06	3.69862e+06	3.9091e+06	1.89169e+06	3.03253e+06	2.40354e+06	3.1688e+06	2.54823e+06	4.12826e+06	4.00509e+06	3.3146e+06
P00425	3	2	161.7	17186	Cytochrome c oxidase polypeptide 5B, mitochondrial OS=Saccharomyces cerevisiae (strain ATCC 204508 / S288c) GN=COX5B PE=1 SV=3	633773	557131	552440	593281	1.14822e+06	946312	704348	893231	533339	689174	607786	657361	954419	998410	762712	757389
P31380	4	4	198.41	128827	ATP-dependent helicase FUN30 OS=Saccharomyces cerevisiae (strain ATCC 204508 / S288c) GN=FUN30 PE=1 SV=1	414186	559395	465856	440459	248573	275341	254443	422754	348550	691974	512528	488032	206618	290500	275527	358462
P21771	4	2	180.2	33151	37S ribosomal protein S28, mitochondrial OS=Saccharomyces cerevisiae (strain ATCC 204508 / S288c) GN=MRPS28 PE=1 SV=1	658788	542972	769115	782763	1.12707e+06	1.16851e+06	1.07123e+06	993969	554390	671658	846169	867308	936834	1.23284e+06	1.16e+06	842807
Q12746	8	8	535.78	35322	Plasma membrane-associated coenzyme Q6 reductase PGA3 OS=Saccharomyces cerevisiae (strain ATCC 204508 / S288c) GN=PGA3 PE=1 SV=1	8.35725e+06	1.00749e+07	6.78937e+06	8.00669e+06	5.11075e+06	6.62331e+06	6.16079e+06	6.39315e+06	7.03288e+06	1.24628e+07	7.46957e+06	8.87148e+06	4.24813e+06	6.98795e+06	6.67129e+06	5.42088e+06
Q08822	11	11	793.29	70103	Probable electron transfer flavoprotein-ubiquinone oxidoreductase, mitochondrial OS=Saccharomyces cerevisiae (strain ATCC 204508 / S288c) GN=CIR2 PE=1 SV=1	1.88849e+06	2.92438e+06	1.73892e+06	2.04252e+06	4.06e+06	3.63816e+06	3.40743e+06	3.48447e+06	1.58922e+06	3.61747e+06	1.91313e+06	2.26313e+06	3.37473e+06	3.83846e+06	3.68977e+06	2.95455e+06
Q12164	4	3	193.46	32279	Pore membrane protein of 33 kDa OS=Saccharomyces cerevisiae (strain ATCC 204508 / S288c) GN=POM33 PE=1 SV=1	751011	549673	819977	619754	1.16316e+06	1.04292e+06	1.08088e+06	890699	631998	679948	902126	686692	966839	1.10033e+06	1.17044e+06	755242
P53254	23	20	1210.03	141024	U3 small nucleolar RNA-associated protein 22 OS=Saccharomyces cerevisiae (strain ATCC 204508 / S288c) GN=UTP22 PE=1 SV=1	5.04096e+06	4.66419e+06	4.91242e+06	5.06892e+06	4.23728e+06	4.47823e+06	4.45304e+06	4.21832e+06	4.24212e+06	5.76962e+06	5.40457e+06	5.61641e+06	3.52209e+06	4.72477e+06	4.82203e+06	3.5768e+06
P32367	2	2	117.5	73678	Transcription factor tau 95 kDa subunit OS=Saccharomyces cerevisiae (strain ATCC 204508 / S288c) GN=TFC1 PE=1 SV=1	310110	333388	368538	363996	420403	445654	400286	421078	260967	412403	405460	403310	349445	470189	433454	357041
P46959	2	2	100.22	44234	tRNA (adenine(58)-N(1))-methyltransferase catalytic subunit TRM61 OS=Saccharomyces cerevisiae (strain ATCC 204508 / S288c) GN=GCD14 PE=1 SV=1	950143	818201	1.04657e+06	808786	618480	550645	649059	781522	799574	1.01212e+06	1.15142e+06	896141	514090	580960	702842	662669
Q03362	4	4	291.27	25421	Uncharacterized protein YDR476C OS=Saccharomyces cerevisiae (strain ATCC 204508 / S288c) GN=YDR476C PE=1 SV=1	915023	1.03933e+06	1.17086e+06	881239	1.33045e+06	1.31018e+06	1.205e+06	1.34776e+06	770019	1.28565e+06	1.28816e+06	976420	1.10589e+06	1.38231e+06	1.30484e+06	1.1428e+06
P38342	5	5	307.99	36520	3-ketodihydrosphingosine reductase TSC10 OS=Saccharomyces cerevisiae (strain ATCC 204508 / S288c) GN=TSC10 PE=1 SV=2	4.01434e+06	4.24323e+06	4.19e+06	4.43581e+06	3.06541e+06	3.27233e+06	2.64067e+06	3.62763e+06	3.37819e+06	5.24889e+06	4.60978e+06	4.91491e+06	2.54801e+06	3.45248e+06	2.85948e+06	3.07594e+06
Q03264	5	5	289.59	60072	RNA exonuclease NGL2 OS=Saccharomyces cerevisiae (strain ATCC 204508 / S288c) GN=NGL2 PE=1 SV=1	644502	661588	722647	646044	491782	583784	461806	591341	542368	818387	795045	715822	408776	615924	500073	501411
P39106	3	3	126.65	89044	Alpha-1,3-mannosyltransferase MNN1 OS=Saccharomyces cerevisiae (strain ATCC 204508 / S288c) GN=MNN1 PE=1 SV=1	1.88299e+06	1.59996e+06	1.43633e+06	1.24021e+06	1.19235e+06	1.30305e+06	1.06471e+06	1.15979e+06	1.58459e+06	1.97915e+06	1.58023e+06	1.37416e+06	991101	1.37479e+06	1.15293e+06	983413
O43137	5	5	250.75	9399	Uncharacterized protein YBR085C-A OS=Saccharomyces cerevisiae (strain ATCC 204508 / S288c) GN=YBR085C-A PE=1 SV=1	1.54687e+06	3.38552e+06	2.53972e+06	3.10981e+06	5.88941e+06	3.73895e+06	5.29558e+06	4.05601e+06	1.30174e+06	4.18791e+06	2.79417e+06	3.44569e+06	4.89537e+06	3.94479e+06	5.73439e+06	3.43918e+06
Q03361	3	3	80.11	98972	Uncharacterized protein JIP4 OS=Saccharomyces cerevisiae (strain ATCC 204508 / S288c) GN=JIP4 PE=1 SV=2	9005.59	9618.87	12952.2	14126	30105.8	29988.1	22304.7	29738.6	7578.48	11898.6	14249.8	15651.8	25024.4	31639.1	24152.9	25216
P40030	2	2	219.38	17238	Ergosterol biosynthetic protein 28 OS=Saccharomyces cerevisiae (strain ATCC 204508 / S288c) GN=ERG28 PE=1 SV=1	219734	81770.6	149557	128783	940847	526565	717975	560926	184913	101151	164541	142692	782046	555555	777469	475621
P08678	6	6	290.57	228832	Adenylate cyclase OS=Saccharomyces cerevisiae (strain ATCC 204508 / S288c) GN=CYR1 PE=1 SV=2	443282	495782	486897	477536	457869	535880	531539	640688	373035	613285	535677	529113	380587	565383	575584	543252
Q08237	3	2	240.84	32931	RNA exonuclease 4 OS=Saccharomyces cerevisiae (strain ATCC 204508 / S288c) GN=REX4 PE=1 SV=1	696667	495095	787980	1.10371e+06	638155	361230	308709	372709	586267	612435	866924	1.22292e+06	530444	381118	334289	316027
P09436	57	56	3658.84	123419	Isoleucine--tRNA ligase, cytoplasmic OS=Saccharomyces cerevisiae (strain ATCC 204508 / S288c) GN=ILS1 PE=1 SV=1	4.96005e+07	5.44311e+07	5.74263e+07	5.4633e+07	4.15945e+07	4.7275e+07	4.02308e+07	5.10971e+07	4.17403e+07	6.73316e+07	6.31795e+07	6.05338e+07	3.45739e+07	4.98777e+07	4.35644e+07	4.33263e+07
Q12451	13	12	648.28	146049	Oxysterol-binding protein homolog 2 OS=Saccharomyces cerevisiae (strain ATCC 204508 / S288c) GN=OSH2 PE=1 SV=1	908829	774795	963774	960288	1.74922e+06	1.36718e+06	1.19729e+06	1.54483e+06	764807	958425	1.06033e+06	1.06401e+06	1.45398e+06	1.44245e+06	1.2965e+06	1.30989e+06
P10849	2	2	101.85	51502	Mitochondrial transcription factor 2 OS=Saccharomyces cerevisiae (strain ATCC 204508 / S288c) GN=MTF2 PE=1 SV=1	111775	223705	162374	143689	393223	322913	415649	301971	94061.7	276724	178641	159209	326853	340691	450091	256047
P51998	7	6	288.23	31950	54S ribosomal protein YmL6, mitochondrial OS=Saccharomyces cerevisiae (strain ATCC 204508 / S288c) GN=YML6 PE=1 SV=1	1.43539e+06	682243	720962	722490	2.79144e+06	2.42576e+06	2.41016e+06	2.01019e+06	1.20793e+06	843938	793191	800525	2.32029e+06	2.55931e+06	2.60987e+06	1.70448e+06
P31334	2	2	85.76	29886	54S ribosomal protein L9, mitochondrial OS=Saccharomyces cerevisiae (strain ATCC 204508 / S288c) GN=MRPL9 PE=1 SV=3	204698	232552	198064	196991	427494	521321	554196	255816	172259	287668	217908	218268	355340	550022	600118	216911
P33338	21	21	1663.68	109356	Protein SLA2 OS=Saccharomyces cerevisiae (strain ATCC 204508 / S288c) GN=SLA2 PE=1 SV=5	4.84135e+06	4.54139e+06	4.55855e+06	4.89753e+06	6.31314e+06	6.18926e+06	5.2818e+06	6.73994e+06	4.07414e+06	5.61772e+06	5.01525e+06	5.4265e+06	5.24758e+06	6.53e+06	5.71946e+06	5.71493e+06
P22140	2	2	140.57	44873	Choline/ethanolaminephosphotransferase 1 OS=Saccharomyces cerevisiae (strain ATCC 204508 / S288c) GN=EPT1 PE=1 SV=2	826044	896605	902905	808186	552832	596684	638328	707677	695141	1.1091e+06	993363	895477	459522	629534	691221	600054
P08524	14	12	722.77	40800	Farnesyl pyrophosphate synthase OS=Saccharomyces cerevisiae (strain ATCC 204508 / S288c) GN=ERG20 PE=1 SV=2	2.18026e+07	2.30233e+07	2.17067e+07	1.96272e+07	3.23219e+07	3.18383e+07	3.48316e+07	2.30664e+07	1.83475e+07	2.84799e+07	2.38814e+07	2.17471e+07	2.68665e+07	3.35911e+07	3.77178e+07	1.95584e+07
P14126	32	30	3164.26	43844	60S ribosomal protein L3 OS=Saccharomyces cerevisiae (strain ATCC 204508 / S288c) GN=RPL3 PE=1 SV=4	2.08057e+08	2.02052e+08	2.19633e+08	2.30517e+08	1.36087e+08	1.68453e+08	1.50155e+08	1.83017e+08	1.75086e+08	2.49939e+08	2.41637e+08	2.55415e+08	1.13118e+08	1.77727e+08	1.62598e+08	1.55183e+08
P53878	3	3	260.65	46759	Uncharacterized oxidoreductase YNL181W OS=Saccharomyces cerevisiae (strain ATCC 204508 / S288c) GN=YNL181W PE=1 SV=2	289371	354327	415381	558157	288161	245540	285384	357640	243515	438304	456996	618442	239523	259058	309031	303250
P21375	10	9	422.76	55202	Fumarate reductase 2 OS=Saccharomyces cerevisiae (strain ATCC 204508 / S288c) GN=OSM1 PE=1 SV=3	515058	480656	468064	425507	878244	728481	687527	958193	433437	594574	514957	471465	730009	768587	744497	812471
P49334	4	4	358.78	16780	Mitochondrial import receptor subunit TOM22 OS=Saccharomyces cerevisiae (strain ATCC 204508 / S288c) GN=TOM22 PE=1 SV=3	9.05092e+06	6.80782e+06	7.3458e+06	7.36255e+06	1.52453e+07	1.33425e+07	1.10375e+07	1.31111e+07	7.61662e+06	8.4213e+06	8.08174e+06	8.15777e+06	1.26721e+07	1.40771e+07	1.19521e+07	1.11172e+07
P32381	14	13	913.75	44217	Actin-related protein 2 OS=Saccharomyces cerevisiae (strain ATCC 204508 / S288c) GN=ARP2 PE=1 SV=1	1.03568e+07	9.07969e+06	7.15367e+06	8.41006e+06	1.49071e+07	1.42041e+07	1.39736e+07	1.0509e+07	8.71558e+06	1.12316e+07	7.87036e+06	9.31842e+06	1.2391e+07	1.49861e+07	1.51315e+07	8.91081e+06
Q12189	7	7	375.91	28355	Ribose-5-phosphate isomerase OS=Saccharomyces cerevisiae (strain ATCC 204508 / S288c) GN=RKI1 PE=1 SV=1	3.76332e+06	3.98326e+06	4.07603e+06	4.32311e+06	3.13681e+06	3.69805e+06	2.97053e+06	3.6519e+06	3.16695e+06	4.92731e+06	4.48439e+06	4.79004e+06	2.60736e+06	3.90165e+06	3.21668e+06	3.09652e+06
P09201	4	4	321.69	38524	Fructose-1,6-bisphosphatase OS=Saccharomyces cerevisiae (strain ATCC 204508 / S288c) GN=FBP1 PE=1 SV=2	49188.3	119379	128823	97262.6	501450	78426.2	96465.2	75306.2	41393.4	147673	141730	107768	416813	82743.9	104459	63853.6
P32349	10	10	499.11	74199	DNA-directed RNA polymerase III subunit RPC3 OS=Saccharomyces cerevisiae (strain ATCC 204508 / S288c) GN=RPC82 PE=1 SV=2	2.62477e+06	2.75335e+06	2.70378e+06	2.89931e+06	2.16148e+06	2.40186e+06	2.18509e+06	2.66216e+06	2.20883e+06	3.40591e+06	2.97466e+06	3.21246e+06	1.79666e+06	2.53409e+06	2.36616e+06	2.2573e+06
P00358	37	7	4140.5	35938	Glyceraldehyde-3-phosphate dehydrogenase 2 OS=Saccharomyces cerevisiae (strain ATCC 204508 / S288c) GN=TDH2 PE=1 SV=3	2.2516e+08	2.23936e+08	2.91568e+08	2.10039e+08	1.68215e+08	1.76314e+08	1.70533e+08	1.49356e+08	1.89479e+08	2.77009e+08	3.20779e+08	2.32725e+08	1.39823e+08	1.86021e+08	1.84663e+08	1.26642e+08
P53615	4	4	173.07	25357	Carbonic anhydrase OS=Saccharomyces cerevisiae (strain ATCC 204508 / S288c) GN=NCE103 PE=1 SV=1	705381	503727	370135	780759	3.76595e+06	1.31934e+06	1.43434e+06	1.6785e+06	593599	623113	407217	865088	3.13031e+06	1.39198e+06	1.55319e+06	1.42324e+06
P32798	3	3	153.96	48410	Cobalt uptake protein COT1 OS=Saccharomyces cerevisiae (strain ATCC 204508 / S288c) GN=COT1 PE=1 SV=2	707914	682980	686637	691323	1.00494e+06	895566	828137	1.12774e+06	595731	844849	755428	765992	835318	944871	896758	956235
P26637	47	45	3460.28	124804	Leucine--tRNA ligase, cytoplasmic OS=Saccharomyces cerevisiae (strain ATCC 204508 / S288c) GN=CDC60 PE=1 SV=1	4.6597e+07	4.91901e+07	4.90712e+07	5.25753e+07	4.16793e+07	4.31355e+07	3.94403e+07	3.2667e+07	3.92128e+07	6.08484e+07	5.39874e+07	5.82539e+07	3.46445e+07	4.55103e+07	4.27084e+07	2.7699e+07
P25694	61	61	4893.28	92167	Cell division control protein 48 OS=Saccharomyces cerevisiae (strain ATCC 204508 / S288c) GN=CDC48 PE=1 SV=3	3.47133e+07	4.03974e+07	3.63672e+07	3.52221e+07	4.04729e+07	3.96032e+07	3.81872e+07	3.98029e+07	2.92123e+07	4.99718e+07	4.00107e+07	3.90264e+07	3.36417e+07	4.17835e+07	4.13515e+07	3.37497e+07
P0CX31	11	11	790.02	15319	40S ribosomal protein S24-A OS=Saccharomyces cerevisiae (strain ATCC 204508 / S288c) GN=RPS24A PE=1 SV=1	6.86846e+07	7.29154e+07	8.40807e+07	7.88215e+07	6.52274e+07	7.59654e+07	7.58863e+07	7.25362e+07	5.78002e+07	9.01967e+07	9.25044e+07	8.73349e+07	5.4218e+07	8.01476e+07	8.21744e+07	6.15049e+07
P39002	3	2	80.15	78467	Long-chain-fatty-acid--CoA ligase 3 OS=Saccharomyces cerevisiae (strain ATCC 204508 / S288c) GN=FAA3 PE=1 SV=1	327601	418052	408425	338663	202348	192303	239026	312082	275686	517132	449343	375241	168194	202890	258832	264621
P28263	2	2	61.18	24675	Ubiquitin-conjugating enzyme E2-24 kDa OS=Saccharomyces cerevisiae (strain ATCC 204508 / S288c) GN=UBC8 PE=1 SV=2	163834	177302	172241	146010	649077	424711	603227	212347	137871	219324	189496	161780	539523	448093	653211	180054
P32332	8	8	379.56	35302	Mitochondrial oxaloacetate transport protein OS=Saccharomyces cerevisiae (strain ATCC 204508 / S288c) GN=OAC1 PE=1 SV=1	4.85281e+06	5.11628e+06	3.54984e+06	3.46603e+06	2.74725e+06	2.50727e+06	3.05953e+06	3.82255e+06	4.08378e+06	6.32886e+06	3.90548e+06	3.84039e+06	2.28356e+06	2.64531e+06	3.31305e+06	3.24122e+06
P38328	12	12	1054.01	43018	Actin-related protein 2/3 complex subunit 1 OS=Saccharomyces cerevisiae (strain ATCC 204508 / S288c) GN=ARC40 PE=1 SV=1	1.05369e+07	1.02183e+07	9.88005e+06	1.18564e+07	1.41535e+07	1.40612e+07	1.36129e+07	1.18492e+07	8.86712e+06	1.26401e+07	1.08699e+07	1.3137e+07	1.17646e+07	1.48353e+07	1.47409e+07	1.00471e+07
P38910	4	4	383.98	11365	10 kDa heat shock protein, mitochondrial OS=Saccharomyces cerevisiae (strain ATCC 204508 / S288c) GN=HSP10 PE=1 SV=1	1.88276e+07	2.72622e+07	2.63746e+07	2.65125e+07	3.2387e+07	5.18946e+07	5.37274e+07	5.27259e+07	1.5844e+07	3.37235e+07	2.90169e+07	2.93761e+07	2.69206e+07	5.47516e+07	5.81793e+07	4.47073e+07
P42844	2	2	121.64	20184	Mitochondrial protein import protein ZIM17 OS=Saccharomyces cerevisiae (strain ATCC 204508 / S288c) GN=ZIM17 PE=1 SV=2	1.08581e+06	1.08163e+06	1.00066e+06	1.25639e+06	1.30388e+06	1.79805e+06	1.82628e+06	1.83043e+06	913743	1.33799e+06	1.10092e+06	1.39209e+06	1.0838e+06	1.89704e+06	1.97761e+06	1.55206e+06
Q07418	8	8	532.1	38796	Peroxisomal membrane protein import receptor PEX19 OS=Saccharomyces cerevisiae (strain ATCC 204508 / S288c) GN=PEX19 PE=1 SV=2	818405	1.25487e+06	677744	910719	1.21858e+06	1.58336e+06	1.68724e+06	1.5433e+06	688712	1.55228e+06	745644	1.00908e+06	1.0129e+06	1.67053e+06	1.82704e+06	1.3086e+06
Q08096	4	4	313.91	40373	RNA 3'-terminal phosphate cyclase-like protein OS=Saccharomyces cerevisiae (strain ATCC 204508 / S288c) GN=RCL1 PE=1 SV=1	1.07379e+06	1.16436e+06	1.26277e+06	1.16066e+06	488677	804773	672394	807099	903623	1.44032e+06	1.38928e+06	1.28602e+06	406196	849079	728110	684356
P00447	6	4	252.6	25815	Superoxide dismutase [Mn], mitochondrial OS=Saccharomyces cerevisiae (strain ATCC 204508 / S288c) GN=SOD2 PE=1 SV=1	2.34362e+06	2.7654e+06	2.99786e+06	2.75155e+06	3.36509e+06	4.49923e+06	3.689e+06	4.15956e+06	1.97223e+06	3.42081e+06	3.2982e+06	3.04874e+06	2.79711e+06	4.74693e+06	3.99468e+06	3.52698e+06
P41911	11	10	1037.76	49790	Glycerol-3-phosphate dehydrogenase [NAD(+)] 2, mitochondrial OS=Saccharomyces cerevisiae (strain ATCC 204508 / S288c) GN=GPD2 PE=1 SV=2	1.36309e+07	1.50913e+07	1.43308e+07	1.25563e+07	1.04423e+07	9.68588e+06	9.99089e+06	1.05021e+07	1.14708e+07	1.8668e+07	1.57666e+07	1.39125e+07	8.67982e+06	1.02191e+07	1.08188e+07	8.90497e+06
Q04175	12	12	878.64	108963	Importin beta SMX1 OS=Saccharomyces cerevisiae (strain ATCC 204508 / S288c) GN=SXM1 PE=1 SV=1	4.15654e+06	4.0567e+06	3.99822e+06	4.28478e+06	3.29846e+06	3.35945e+06	3.11472e+06	4.06973e+06	3.49785e+06	5.01816e+06	4.39878e+06	4.74758e+06	2.74173e+06	3.5444e+06	3.37281e+06	3.45081e+06
P06168	31	31	2374.64	44512	Ketol-acid reductoisomerase, mitochondrial OS=Saccharomyces cerevisiae (strain ATCC 204508 / S288c) GN=ILV5 PE=1 SV=1	1.30901e+08	1.55755e+08	1.20068e+08	1.27837e+08	1.15163e+08	1.20737e+08	1.12964e+08	1.35701e+08	1.10157e+08	1.92669e+08	1.32097e+08	1.41645e+08	9.57252e+07	1.27384e+08	1.22324e+08	1.15064e+08
Q02959	2	2	146.3	79607	Histone deacetylase HOS3 OS=Saccharomyces cerevisiae (strain ATCC 204508 / S288c) GN=HOS3 PE=1 SV=1	250166	281960	309533	186585	475197	465960	403853	480000	210523	348785	340543	206738	394991	491613	437317	407002
P36062	5	5	226.28	75925	Vacuolar amino acid transporter 3 OS=Saccharomyces cerevisiae (strain ATCC 204508 / S288c) GN=AVT3 PE=1 SV=1	712318	703675	742743	672485	1.27413e+06	1.2749e+06	946319	1.14873e+06	599437	870450	817155	745119	1.05907e+06	1.34509e+06	1.02473e+06	974032
P47173	3	3	121.8	39836	Uncharacterized protein YJR142W OS=Saccharomyces cerevisiae (strain ATCC 204508 / S288c) GN=YJR142W PE=1 SV=1	468000	390770	412744	423057	728878	601838	488045	543262	393836	483384	454095	468750	605854	634972	528485	460643
Q12453	8	7	495.14	85229	Cytoplasmic export protein 1 OS=Saccharomyces cerevisiae (strain ATCC 204508 / S288c) GN=CEX1 PE=1 SV=1	1.3993e+06	1.5088e+06	1.06465e+06	1.12141e+06	1.92641e+06	1.87674e+06	1.68988e+06	1.84348e+06	1.17755e+06	1.8664e+06	1.17132e+06	1.24253e+06	1.60126e+06	1.98006e+06	1.82991e+06	1.56312e+06
P32792	4	4	166.31	44549	UPF0744 protein YSC83 OS=Saccharomyces cerevisiae (strain ATCC 204508 / S288c) GN=YSC83 PE=1 SV=1	94940.4	165985	150477	113886	154606	169690	190571	180428	79895.2	205324	165553	126186	128511	179032	206362	152989
P40093	12	12	742.61	38379	UPF0160 protein YER156C OS=Saccharomyces cerevisiae (strain ATCC 204508 / S288c) GN=YER156C PE=1 SV=1	8.30317e+06	7.79227e+06	1.03117e+07	9.00523e+06	7.43464e+06	7.95836e+06	7.08958e+06	7.77638e+06	6.98737e+06	9.63907e+06	1.13448e+07	9.97786e+06	6.17979e+06	8.3965e+06	7.67704e+06	6.59375e+06
P34253	3	3	213.74	35642	Protein KTI12 OS=Saccharomyces cerevisiae (strain ATCC 204508 / S288c) GN=KTI12 PE=1 SV=2	597252	698417	481824	525565	360550	396869	409260	296879	502606	863945	530096	582331	299695	418718	443172	251730
P08536	5	5	427.13	57746	Sulfate adenylyltransferase OS=Saccharomyces cerevisiae (strain ATCC 204508 / S288c) GN=MET3 PE=1 SV=2	448936	841050	517509	362272	1.12734e+06	1.13772e+06	1.40696e+06	726095	377793	1.04038e+06	569356	401400	937064	1.20036e+06	1.52355e+06	615671
P53968	2	2	114.41	76654	Transcriptional regulator CRZ1 OS=Saccharomyces cerevisiae (strain ATCC 204508 / S288c) GN=CRZ1 PE=1 SV=1	310745	224389	235561	389030	496412	489770	505854	465984	261501	277570	259161	431049	412625	516734	547770	395117
P47006	6	6	361.29	26916	DNA-directed RNA polymerase I subunit RPA34 OS=Saccharomyces cerevisiae (strain ATCC 204508 / S288c) GN=RPA34 PE=1 SV=1	4.44742e+06	6.68893e+06	6.25797e+06	5.7248e+06	3.13432e+06	4.06028e+06	3.81652e+06	4.7947e+06	3.74263e+06	8.27424e+06	6.88493e+06	6.34312e+06	2.60529e+06	4.28382e+06	4.13277e+06	4.06553e+06
P50101	9	8	410.11	143873	Ubiquitin carboxyl-terminal hydrolase 15 OS=Saccharomyces cerevisiae (strain ATCC 204508 / S288c) GN=UBP15 PE=1 SV=1	1.10664e+06	747314	886658	895096	1.89073e+06	1.67558e+06	1.37855e+06	1.5762e+06	931268	924431	975488	991774	1.5716e+06	1.76782e+06	1.49278e+06	1.33649e+06
Q12277	4	4	270.45	29094	Exosome complex component RRP42 OS=Saccharomyces cerevisiae (strain ATCC 204508 / S288c) GN=RRP42 PE=1 SV=1	1.67169e+06	2.4652e+06	2.20815e+06	2.24606e+06	1.16631e+06	1.42458e+06	1.51072e+06	1.53278e+06	1.40678e+06	3.04946e+06	2.42938e+06	2.48866e+06	969454	1.50301e+06	1.63591e+06	1.29968e+06
P36017	7	6	379.33	23181	Vacuolar protein sorting-associated protein 21 OS=Saccharomyces cerevisiae (strain ATCC 204508 / S288c) GN=VPS21 PE=1 SV=1	4.08941e+06	3.53731e+06	3.59076e+06	3.52294e+06	5.16136e+06	4.68364e+06	4.78111e+06	5.27458e+06	3.44137e+06	4.37567e+06	3.9505e+06	3.90345e+06	4.2902e+06	4.9415e+06	5.17728e+06	4.47242e+06
Q05812	4	4	317.62	80482	Meiotic sister-chromatid recombination protein 3 OS=Saccharomyces cerevisiae (strain ATCC 204508 / S288c) GN=MSC3 PE=1 SV=1	332887	492997	497543	452436	737727	756176	640569	625344	280134	609839	547389	501302	613210	797807	693648	530242
P32327	43	13	2856.02	130769	Pyruvate carboxylase 2 OS=Saccharomyces cerevisiae (strain ATCC 204508 / S288c) GN=PYC2 PE=1 SV=2	1.14299e+07	1.30487e+07	9.96385e+06	1.02505e+07	1.8828e+07	1.61219e+07	1.56786e+07	1.48261e+07	9.61861e+06	1.61413e+07	1.09621e+07	1.13577e+07	1.56501e+07	1.70094e+07	1.69778e+07	1.25714e+07
P0CX33	4	4	198.8	7114	40S ribosomal protein S30-A OS=Saccharomyces cerevisiae (strain ATCC 204508 / S288c) GN=RPS30A PE=1 SV=1	3.21213e+07	4.10233e+07	3.85024e+07	3.67766e+07	2.67892e+07	3.33035e+07	2.99002e+07	3.4542e+07	2.70311e+07	5.0746e+07	4.23598e+07	4.07488e+07	2.22676e+07	3.5137e+07	3.23777e+07	2.92889e+07
P39940	21	20	1716.06	91988	E3 ubiquitin-protein ligase RSP5 OS=Saccharomyces cerevisiae (strain ATCC 204508 / S288c) GN=RSP5 PE=1 SV=1	5.64189e+06	5.68451e+06	6.46587e+06	5.7039e+06	7.34884e+06	7.56227e+06	7.06304e+06	6.98256e+06	4.74782e+06	7.03176e+06	7.11366e+06	6.31997e+06	6.10847e+06	7.97861e+06	7.6483e+06	5.92065e+06
P50945	3	3	158.28	27057	MICOS complex subunit MIC27 OS=Saccharomyces cerevisiae (strain ATCC 204508 / S288c) GN=MIC27 PE=1 SV=1	427178	649503	590407	480858	1.04393e+06	1.31384e+06	1.1657e+06	929232	359483	803439	649557	532795	867732	1.38618e+06	1.2623e+06	787915
Q12091	5	5	362.05	16861	Damage response protein 1 OS=Saccharomyces cerevisiae (strain ATCC 204508 / S288c) GN=DAP1 PE=1 SV=1	1.33146e+06	1.54748e+06	1.19077e+06	1.12522e+06	2.19417e+06	2.35407e+06	2.7188e+06	4.63277e+06	1.12047e+06	1.91424e+06	1.31007e+06	1.24675e+06	1.82383e+06	2.48367e+06	2.94409e+06	3.92822e+06
P53299	3	3	272.75	11507	Mitochondrial import inner membrane translocase subunit TIM13 OS=Saccharomyces cerevisiae (strain ATCC 204508 / S288c) GN=TIM13 PE=1 SV=1	2.46229e+06	3.29575e+06	3.49968e+06	3.50114e+06	3.98992e+06	5.55276e+06	4.44386e+06	5.06188e+06	2.0721e+06	4.07686e+06	3.8503e+06	3.87929e+06	3.31648e+06	5.85846e+06	4.81208e+06	4.29207e+06
P32912	2	2	75.52	36746	Vacuolar morphogenesis protein 7 OS=Saccharomyces cerevisiae (strain ATCC 204508 / S288c) GN=VAM7 PE=1 SV=1	292105	321300	357002	328577	411207	423633	420453	502013	245815	397449	392768	364066	341801	446956	455293	425667
P53923	3	2	192.9	57064	Cytoplasmic tRNA 2-thiolation protein 2 OS=Saccharomyces cerevisiae (strain ATCC 204508 / S288c) GN=NCS2 PE=1 SV=1	420730	469753	593163	530989	262632	214111	326520	389380	354057	581087	652589	588340	218303	225899	353577	330164
P38719	6	6	302.1	48076	ATP-dependent RNA helicase DBP8 OS=Saccharomyces cerevisiae (strain ATCC 204508 / S288c) GN=DBP8 PE=1 SV=1	1.25363e+06	2.00512e+06	1.42472e+06	1.43409e+06	660419	741682	813494	759123	1.05497e+06	2.48034e+06	1.56745e+06	1.58898e+06	548950	782515	880902	643676
P47112	4	3	134.98	68761	Cell division cycle protein CDT1 OS=Saccharomyces cerevisiae (strain ATCC 204508 / S288c) GN=TAH11 PE=1 SV=1	410440	546672	437132	517189	271885	311675	384052	415324	345398	676236	480926	573049	225995	328834	415876	352162
Q12680	53	49	3801.04	240118	Glutamate synthase [NADH] OS=Saccharomyces cerevisiae (strain ATCC 204508 / S288c) GN=GLT1 PE=1 SV=2	1.3053e+07	1.45206e+07	1.52519e+07	1.57439e+07	1.12326e+07	1.03084e+07	9.03014e+06	1.03577e+07	1.09845e+07	1.7962e+07	1.67799e+07	1.74444e+07	9.3367e+06	1.08759e+07	9.7784e+06	8.78249e+06
Q02799	2	2	109.37	34031	Zinc finger protein LEE1 OS=Saccharomyces cerevisiae (strain ATCC 204508 / S288c) GN=LEE1 PE=1 SV=1	70469.9	113212	116126	44973	224719	169414	169842	115319	59302.6	140043	127761	49830.5	186790	178740	183916	97781.6
P32796	3	2	106.98	77592	Carnitine O-acetyltransferase, mitochondrial OS=Saccharomyces cerevisiae (strain ATCC 204508 / S288c) GN=CAT2 PE=1 SV=2	3184.48	6208.29	4921.61	26731.1	54330.8	53938.9	22815.4	43134.6	2679.84	7679.68	5414.68	29618.3	45160.6	56908.5	24706	36574.7
P38249	45	44	3277.47	110333	Eukaryotic translation initiation factor 3 subunit A OS=Saccharomyces cerevisiae (strain ATCC 204508 / S288c) GN=RPG1 PE=1 SV=1	2.69365e+07	3.85649e+07	3.18227e+07	3.40223e+07	2.06066e+07	2.47267e+07	2.34089e+07	2.85654e+07	2.26679e+07	4.7705e+07	3.50109e+07	3.7697e+07	1.71285e+07	2.6088e+07	2.53487e+07	2.42212e+07
Q02648	3	3	113.67	65271	tRNA (uracil-O(2)-)-methyltransferase OS=Saccharomyces cerevisiae (strain ATCC 204508 / S288c) GN=TRM44 PE=1 SV=1	501745	612296	673857	567538	139104	265457	271489	223250	422233	757413	741368	628837	115625	280072	293985	189298
P00729	7	7	656.84	60448	Carboxypeptidase Y OS=Saccharomyces cerevisiae (strain ATCC 204508 / S288c) GN=PRC1 PE=1 SV=1	9.63506e+06	7.98988e+06	8.47353e+06	7.71633e+06	2.28031e+07	1.47256e+07	1.63016e+07	1.07459e+07	8.10819e+06	9.88352e+06	9.32246e+06	8.54975e+06	1.89543e+07	1.55364e+07	1.76524e+07	9.11167e+06
P09440	33	28	2275.41	106607	C-1-tetrahydrofolate synthase, mitochondrial OS=Saccharomyces cerevisiae (strain ATCC 204508 / S288c) GN=MIS1 PE=1 SV=1	7.93119e+06	6.76452e+06	7.57017e+06	8.16266e+06	4.90324e+06	5.42624e+06	5.7072e+06	6.46627e+06	6.67434e+06	8.36774e+06	8.32859e+06	9.0443e+06	4.07565e+06	5.72498e+06	6.18011e+06	5.48289e+06
Q12019	43	42	2626.26	561182	Midasin OS=Saccharomyces cerevisiae (strain ATCC 204508 / S288c) GN=MDN1 PE=1 SV=1	2.97778e+06	2.8698e+06	2.88654e+06	3.03231e+06	2.07883e+06	2.3791e+06	2.02882e+06	2.52099e+06	2.50589e+06	3.54996e+06	3.17573e+06	3.35982e+06	1.72795e+06	2.51008e+06	2.19693e+06	2.1376e+06
P40535	4	4	277.92	65338	ATF/CREB activator 2 OS=Saccharomyces cerevisiae (strain ATCC 204508 / S288c) GN=CST6 PE=1 SV=1	560586	832926	652675	898501	1.03376e+06	1.11058e+06	1.03885e+06	1.13157e+06	471750	1.03033e+06	718063	995546	859276	1.17172e+06	1.12494e+06	959479
P40150	34	4	4571.47	66668	Heat shock protein SSB2 OS=Saccharomyces cerevisiae (strain ATCC 204508 / S288c) GN=SSB2 PE=1 SV=2	2.26795e+08	2.61932e+08	2.74314e+08	2.76151e+08	1.60087e+08	2.01164e+08	1.94393e+08	2.21561e+08	1.90855e+08	3.24011e+08	3.01797e+08	3.05977e+08	1.33066e+08	2.12239e+08	2.10501e+08	1.87866e+08
P11484	33	3	4515.37	66732	Heat shock protein SSB1 OS=Saccharomyces cerevisiae (strain ATCC 204508 / S288c) GN=SSB1 PE=1 SV=3	2.94854e+08	3.40535e+08	3.56634e+08	3.59021e+08	2.08127e+08	2.61532e+08	2.52728e+08	2.88049e+08	2.48129e+08	4.21243e+08	3.92363e+08	3.97798e+08	1.72998e+08	2.7593e+08	2.7367e+08	2.44243e+08
P53261	15	14	1146.12	70062	Pescadillo homolog OS=Saccharomyces cerevisiae (strain ATCC 204508 / S288c) GN=NOP7 PE=1 SV=1	8.99723e+06	8.81864e+06	1.06911e+07	9.58911e+06	4.83499e+06	6.01572e+06	5.57788e+06	9.52236e+06	7.57144e+06	1.09087e+07	1.17622e+07	1.06248e+07	4.01892e+06	6.34691e+06	6.04008e+06	8.07421e+06
P10622	4	4	330.81	10661	60S acidic ribosomal protein P1-beta OS=Saccharomyces cerevisiae (strain ATCC 204508 / S288c) GN=RPP1B PE=1 SV=3	1.31738e+08	1.50527e+08	1.63392e+08	1.49387e+08	1.16887e+08	1.31627e+08	1.19574e+08	1.45779e+08	1.10861e+08	1.86203e+08	1.79761e+08	1.65522e+08	9.71584e+07	1.38874e+08	1.29482e+08	1.23609e+08
P04786	3	3	146.83	90339	DNA topoisomerase 1 OS=Saccharomyces cerevisiae (strain ATCC 204508 / S288c) GN=TOP1 PE=1 SV=2	638225	753326	710480	749270	488061	592794	590850	557255	537086	931868	781660	830197	405683	625430	639809	472508
P20049	3	3	134.4	51290	Prephenate dehydrogenase [NADP(+)] OS=Saccharomyces cerevisiae (strain ATCC 204508 / S288c) GN=TYR1 PE=1 SV=2	366324	385207	413443	360461	338690	319516	316580	369313	308272	476502	454864	399394	281524	337106	342812	313148
P38075	9	8	533.32	26949	Pyridoxamine 5'-phosphate oxidase OS=Saccharomyces cerevisiae (strain ATCC 204508 / S288c) GN=PDX3 PE=1 SV=1	4.73233e+06	5.32282e+06	5.00206e+06	4.73185e+06	7.74285e+06	6.43792e+06	6.67361e+06	5.91052e+06	3.9824e+06	6.58436e+06	5.5032e+06	5.24292e+06	6.43597e+06	6.79236e+06	7.2266e+06	5.01165e+06
Q99210	3	3	137.28	26688	Maf-like protein YOR111W OS=Saccharomyces cerevisiae (strain ATCC 204508 / S288c) GN=YOR111W PE=1 SV=1	365470	271145	331341	335647	341171	467855	458314	421208	307554	335408	364537	371900	283587	493612	496291	357151
P10614	16	16	1551.67	60909	Lanosterol 14-alpha demethylase OS=Saccharomyces cerevisiae (strain ATCC 204508 / S288c) GN=ERG11 PE=1 SV=1	1.94467e+07	1.83873e+07	2.08873e+07	1.66778e+07	1.35668e+07	1.47153e+07	1.55105e+07	1.86045e+07	1.6365e+07	2.27451e+07	2.29799e+07	1.84791e+07	1.1277e+07	1.55254e+07	1.67957e+07	1.57751e+07
P53549	14	13	914.52	49492	26S protease subunit RPT4 OS=Saccharomyces cerevisiae (strain ATCC 204508 / S288c) GN=RPT4 PE=1 SV=4	4.63285e+06	4.49181e+06	4.63879e+06	4.69982e+06	5.33163e+06	5.35172e+06	5.27432e+06	5.19691e+06	3.89869e+06	5.55639e+06	5.10353e+06	5.20744e+06	4.43173e+06	5.64635e+06	5.71136e+06	4.40656e+06
P25371	14	14	801.35	119038	Probable ATP-dependent permease OS=Saccharomyces cerevisiae (strain ATCC 204508 / S288c) GN=ADP1 PE=1 SV=2	1.25627e+06	1.27647e+06	1.02652e+06	1.23064e+06	1.82143e+06	1.60359e+06	2.06639e+06	1.70442e+06	1.05719e+06	1.579e+06	1.12937e+06	1.36356e+06	1.514e+06	1.69187e+06	2.23761e+06	1.44521e+06
P53753	4	4	244.07	121104	Endo-1,3(4)-beta-glucanase 1 OS=Saccharomyces cerevisiae (strain ATCC 204508 / S288c) GN=DSE4 PE=1 SV=1	263451	358824	249132	301747	357811	236961	322024	440258	221702	443867	274092	334338	297418	250007	348708	373304
P23287	7	7	328.03	63532	Serine/threonine-protein phosphatase 2B catalytic subunit A1 OS=Saccharomyces cerevisiae (strain ATCC 204508 / S288c) GN=CNA1 PE=1 SV=2	1.12587e+06	1.1461e+06	1.23671e+06	1.26514e+06	1.71135e+06	1.64815e+06	1.50127e+06	1.6653e+06	947451	1.41773e+06	1.36061e+06	1.40178e+06	1.4225e+06	1.73889e+06	1.62566e+06	1.41204e+06
P25368	4	4	113.74	34620	Ribosomal RNA-processing protein 7 OS=Saccharomyces cerevisiae (strain ATCC 204508 / S288c) GN=RRP7 PE=1 SV=1	719603	804321	807918	693196	522519	576551	591637	703456	605568	994949	888859	768067	434326	608293	640662	596475
P27999	3	3	237.71	14735	DNA-directed RNA polymerase II subunit RPB9 OS=Saccharomyces cerevisiae (strain ATCC 204508 / S288c) GN=RPB9 PE=1 SV=1	3.62372e+06	3.60435e+06	3.8652e+06	3.59194e+06	4.40137e+06	4.24299e+06	4.005e+06	4.44161e+06	3.04947e+06	4.4586e+06	4.25244e+06	3.9799e+06	3.65848e+06	4.47659e+06	4.33687e+06	3.76613e+06
P50108	5	5	250.14	47003	Probable alpha-1,6-mannosyltransferase MNN10 OS=Saccharomyces cerevisiae (strain ATCC 204508 / S288c) GN=MNN10 PE=1 SV=1	733422	682755	802432	770735	597340	615605	629880	679353	617197	844572	882824	853981	496518	649497	682073	576038
P47077	6	6	400.17	77958	Nucleolar protein 9 OS=Saccharomyces cerevisiae (strain ATCC 204508 / S288c) GN=NOP9 PE=1 SV=1	2.96017e+06	3.40792e+06	2.61341e+06	2.39953e+06	2.17653e+06	2.42914e+06	1.6969e+06	1.57912e+06	2.49107e+06	4.21561e+06	2.87524e+06	2.6587e+06	1.80916e+06	2.56288e+06	1.8375e+06	1.33897e+06
Q00772	8	7	433.17	56114	Mitogen-activated protein kinase SLT2/MPK1 OS=Saccharomyces cerevisiae (strain ATCC 204508 / S288c) GN=SLT2 PE=1 SV=2	1.55794e+06	1.98601e+06	1.38076e+06	1.64649e+06	2.67898e+06	2.57727e+06	2.738e+06	1.93236e+06	1.31106e+06	2.45671e+06	1.51909e+06	1.82432e+06	2.22681e+06	2.71916e+06	2.96488e+06	1.63848e+06
P32644	6	6	384.72	128032	Putative ATP-dependent RNA helicase ECM32 OS=Saccharomyces cerevisiae (strain ATCC 204508 / S288c) GN=ECM32 PE=1 SV=1	417749	413977	488446	444033	146778	228545	196978	160927	351549	512091	537381	491993	122004	241127	213300	136453
P48589	11	11	1069.05	15462	40S ribosomal protein S12 OS=Saccharomyces cerevisiae (strain ATCC 204508 / S288c) GN=RPS12 PE=1 SV=1	1.85908e+08	1.76997e+08	2.06135e+08	1.70605e+08	1.57331e+08	1.76709e+08	1.68986e+08	1.75524e+08	1.56447e+08	2.18946e+08	2.26787e+08	1.89032e+08	1.30776e+08	1.86437e+08	1.82989e+08	1.4883e+08
P39980	3	3	92.67	71143	Siderophore iron transporter 1 OS=Saccharomyces cerevisiae (strain ATCC 204508 / S288c) GN=SIT1 PE=3 SV=1	415829	678314	702458	620497	1.13724e+06	1.10957e+06	1.14393e+06	1.28311e+06	349933	839078	772834	687515	945291	1.17066e+06	1.23872e+06	1.08797e+06
P31374;Q08217	8	7	428.09	152921	Serine/threonine-protein kinase PSK1 OS=Saccharomyces cerevisiae (strain ATCC 204508 / S288c) GN=PSK1 PE=1 SV=2	187960	294642	362168	229632	509759	395892	382497	558406	158174	364474	398452	254435	423720	417688	414191	473484
P29453	23	4	2159.01	28151	60S ribosomal protein L8-B OS=Saccharomyces cerevisiae (strain ATCC 204508 / S288c) GN=RPL8B PE=1 SV=3	1.24345e+08	1.38536e+08	1.57025e+08	1.51578e+08	9.28971e+07	1.15565e+08	1.09371e+08	1.24262e+08	1.0464e+08	1.7137e+08	1.72756e+08	1.6795e+08	7.72174e+07	1.21927e+08	1.18434e+08	1.05364e+08
P17076	25	6	2201.68	28164	60S ribosomal protein L8-A OS=Saccharomyces cerevisiae (strain ATCC 204508 / S288c) GN=RPL8A PE=1 SV=4	4.88777e+07	5.44558e+07	6.17232e+07	5.95823e+07	3.6516e+07	4.54263e+07	4.29915e+07	4.88447e+07	4.1132e+07	6.73621e+07	6.7907e+07	6.60177e+07	3.03526e+07	4.79272e+07	4.65539e+07	4.14164e+07
Q03667	2	2	123.7	16887	Mitochondrial intermembrane space cysteine motif-containing protein MIX17 OS=Saccharomyces cerevisiae (strain ATCC 204508 / S288c) GN=MIX17 PE=1 SV=1	1.92625e+06	3.58934e+06	2.71745e+06	2.90394e+06	3.88011e+06	4.63696e+06	4.3714e+06	3.84171e+06	1.621e+06	4.44003e+06	2.9897e+06	3.21759e+06	3.22521e+06	4.89224e+06	4.73362e+06	3.25747e+06
P32657	7	7	387.15	168479	Chromo domain-containing protein 1 OS=Saccharomyces cerevisiae (strain ATCC 204508 / S288c) GN=CHD1 PE=1 SV=1	1.24833e+06	1.49098e+06	1.19289e+06	1.29916e+06	1.83898e+06	1.55091e+06	1.63965e+06	1.31309e+06	1.05051e+06	1.84436e+06	1.31239e+06	1.43948e+06	1.52859e+06	1.63629e+06	1.77552e+06	1.11339e+06
Q02647	2	2	55.32	10434	Dynein light chain 1, cytoplasmic OS=Saccharomyces cerevisiae (strain ATCC 204508 / S288c) GN=DYN2 PE=1 SV=1	1.89275e+06	2.57833e+06	2.27209e+06	2.83051e+06	3.41516e+06	4.57778e+06	3.89941e+06	4.35776e+06	1.59281e+06	3.18941e+06	2.49971e+06	3.13623e+06	2.83873e+06	4.8298e+06	4.22252e+06	3.69504e+06
Q12515	3	3	368.43	31867	Protein PAR32 OS=Saccharomyces cerevisiae (strain ATCC 204508 / S288c) GN=PAR32 PE=1 SV=1	1.95928e+06	1.8888e+06	2.13362e+06	2.22393e+06	2.6863e+06	3.26743e+06	3.02302e+06	4.22547e+06	1.64879e+06	2.33646e+06	2.34737e+06	2.46413e+06	2.23289e+06	3.44732e+06	3.27351e+06	3.58286e+06
Q03266	2	2	51.49	43069	Aminodeoxychorismate lyase OS=Saccharomyces cerevisiae (strain ATCC 204508 / S288c) GN=ABZ2 PE=1 SV=1	334396	307488	363403	326946	598529	540942	494126	690354	281404	380364	399810	362259	497506	570723	535070	585365
P39713	2	2	61.17	46867	Probable diacetyl reductase [(R)-acetoin forming] 2 OS=Saccharomyces cerevisiae (strain ATCC 204508 / S288c) GN=BDH2 PE=1 SV=1	20203.2	14894.7	33260.5	13221.1	116718	62336.8	54547.2	19893.9	17001.6	18424.9	36592.8	14649.1	97017.5	65768.7	59067.1	16868.5
P53953	8	6	462.36	99622	SED5-binding protein 2 OS=Saccharomyces cerevisiae (strain ATCC 204508 / S288c) GN=SFB2 PE=1 SV=1	1.04919e+06	1.45957e+06	1.29541e+06	1.39162e+06	777781	949465	954876	940740	882928	1.8055e+06	1.42519e+06	1.54192e+06	646504	1.00174e+06	1.034e+06	797673
Q06108	2	2	92.57	121061	Regulator of the glycerol channel 1 OS=Saccharomyces cerevisiae (strain ATCC 204508 / S288c) GN=RGC1 PE=1 SV=1	20356.9	53587.4	44901.4	45758.2	182373	76652.1	98377.6	87394.2	17131	66287.8	49399.8	50700.5	151591	80872.2	106529	74103.3
Q06344	10	10	544.82	72537	Pre-rRNA-processing protein ESF1 OS=Saccharomyces cerevisiae (strain ATCC 204508 / S288c) GN=ESF1 PE=1 SV=1	1.90102e+06	1.84527e+06	2.70292e+06	2.41218e+06	1.43639e+06	1.6296e+06	1.32041e+06	2.61489e+06	1.59977e+06	2.2826e+06	2.97372e+06	2.67272e+06	1.19395e+06	1.71932e+06	1.42983e+06	2.21722e+06
P14540	29	29	3549.25	39881	Fructose-bisphosphate aldolase OS=Saccharomyces cerevisiae (strain ATCC 204508 / S288c) GN=FBA1 PE=1 SV=3	1.21595e+09	1.32879e+09	1.30204e+09	1.265e+09	8.73209e+08	1.00101e+09	8.75479e+08	5.72589e+08	1.02326e+09	1.64372e+09	1.43248e+09	1.40163e+09	7.25824e+08	1.05612e+09	9.48023e+08	4.8551e+08
Q03690	58	57	4625.62	145304	Clustered mitochondria protein 1 OS=Saccharomyces cerevisiae (strain ATCC 204508 / S288c) GN=CLU1 PE=1 SV=1	1.6837e+07	1.63126e+07	1.83689e+07	1.96035e+07	2.3438e+07	2.54201e+07	2.23909e+07	2.13309e+07	1.41688e+07	2.01787e+07	2.02091e+07	2.17209e+07	1.9482e+07	2.68196e+07	2.42463e+07	1.80869e+07
P08539	3	3	190.34	54498	Guanine nucleotide-binding protein alpha-1 subunit OS=Saccharomyces cerevisiae (strain ATCC 204508 / S288c) GN=GPA1 PE=1 SV=3	869910	896481	1.03719e+06	928740	770662	747535	772730	849144	732055	1.10895e+06	1.14111e+06	1.02905e+06	640586	788690	836761	720006
P06776	3	3	162.14	61588	3',5'-cyclic-nucleotide phosphodiesterase 2 OS=Saccharomyces cerevisiae (strain ATCC 204508 / S288c) GN=PDE2 PE=1 SV=2	427134	418149	412302	384252	344009	274117	295020	313476	359446	517253	453608	425754	285946	289208	319466	265803
P28496	2	2	88.38	49188	Sphingosine N-acyltransferase LAC1 OS=Saccharomyces cerevisiae (strain ATCC 204508 / S288c) GN=LAC1 PE=1 SV=2	3.95027e+06	3.77623e+06	3.84578e+06	3.56068e+06	2.90105e+06	3.06158e+06	3.22537e+06	2.24228e+06	3.32427e+06	4.67122e+06	4.23107e+06	3.94526e+06	2.4114e+06	3.23014e+06	3.49263e+06	1.90128e+06
Q08004	3	3	161.04	18620	Bud site selection protein 20 OS=Saccharomyces cerevisiae (strain ATCC 204508 / S288c) GN=BUD20 PE=1 SV=1	1.97067e+06	1.61693e+06	2.24836e+06	2.18718e+06	759194	886722	539927	1.4759e+06	1.65838e+06	2.00016e+06	2.47362e+06	2.42341e+06	631053	935540	584666	1.25144e+06
Q06706	23	23	1566.63	153693	Elongator complex protein 1 OS=Saccharomyces cerevisiae (strain ATCC 204508 / S288c) GN=IKI3 PE=1 SV=1	5.19103e+06	5.1361e+06	4.29638e+06	5.14159e+06	2.9921e+06	3.80966e+06	3.83815e+06	4.51636e+06	4.36841e+06	6.35339e+06	4.72682e+06	5.69692e+06	2.48708e+06	4.0194e+06	4.15619e+06	3.82952e+06
P40078	8	8	405.81	29761	Ribosome biogenesis protein NSA2 OS=Saccharomyces cerevisiae (strain ATCC 204508 / S288c) GN=NSA2 PE=1 SV=1	4.2405e+06	4.15428e+06	4.6255e+06	4.57758e+06	2.21435e+06	2.79378e+06	2.45023e+06	3.01667e+06	3.56851e+06	5.13887e+06	5.0889e+06	5.07199e+06	1.8406e+06	2.94759e+06	2.65326e+06	2.5579e+06
P10834	2	2	126.22	34616	Protein PET54 OS=Saccharomyces cerevisiae (strain ATCC 204508 / S288c) GN=PET54 PE=1 SV=1	200363	178001	219748	206529	333067	238520	486788	366558	168611	220188	241764	228836	276850	251651	527125	310812
P21538	7	7	397.4	92161	DNA-binding protein REB1 OS=Saccharomyces cerevisiae (strain ATCC 204508 / S288c) GN=REB1 PE=1 SV=2	2.96228e+06	3.89139e+06	3.44484e+06	3.68226e+06	4.39182e+06	4.2761e+06	4.33802e+06	4.54401e+06	2.49285e+06	4.81366e+06	3.78996e+06	4.07998e+06	3.65055e+06	4.51152e+06	4.69748e+06	3.85295e+06
Q05948	6	5	285.26	46793	Uncharacterized SVF1-like protein YLR225C OS=Saccharomyces cerevisiae (strain ATCC 204508 / S288c) GN=YLR225C PE=1 SV=1	1.86149e+06	1.83181e+06	2.18578e+06	1.55634e+06	1.23928e+06	1.28127e+06	1.40023e+06	1.24141e+06	1.5665e+06	2.26596e+06	2.40476e+06	1.72443e+06	1.03011e+06	1.35181e+06	1.51625e+06	1.05262e+06
P07280	13	11	1130.64	15907	40S ribosomal protein S19-A OS=Saccharomyces cerevisiae (strain ATCC 204508 / S288c) GN=RPS19A PE=1 SV=2	2.73231e+08	2.4994e+08	2.91455e+08	2.70995e+08	2.22991e+08	2.82766e+08	2.40007e+08	2.81923e+08	2.29932e+08	3.09178e+08	3.20654e+08	3.00264e+08	1.85354e+08	2.98334e+08	2.59894e+08	2.39048e+08
P53145	19	19	1271.3	72911	Large subunit GTPase 1 OS=Saccharomyces cerevisiae (strain ATCC 204508 / S288c) GN=LSG1 PE=1 SV=1	1.19422e+07	1.17402e+07	1.24487e+07	1.22364e+07	1.08295e+07	1.01584e+07	1.11684e+07	1.12959e+07	1.00497e+07	1.45227e+07	1.36959e+07	1.35581e+07	9.00167e+06	1.07176e+07	1.20938e+07	9.57802e+06
Q02795	2	2	134.71	31747	Dolichyl-diphosphooligosaccharide--protein glycosyltransferase subunit SWP1 OS=Saccharomyces cerevisiae (strain ATCC 204508 / S288c) GN=SWP1 PE=1 SV=1	6.52574e+06	7.42726e+06	6.87954e+06	6.76772e+06	4.61028e+06	4.80277e+06	4.81832e+06	6.3141e+06	5.49161e+06	9.18756e+06	7.56877e+06	7.49868e+06	3.83213e+06	5.06719e+06	5.21758e+06	5.35385e+06
P38144;Q08773	17	16	957.39	131534	ISWI chromatin-remodeling complex ATPase ISW1 OS=Saccharomyces cerevisiae (strain ATCC 204508 / S288c) GN=ISW1 PE=1 SV=2	3.31833e+06	2.68821e+06	2.72241e+06	2.88583e+06	2.3298e+06	2.32567e+06	2.46398e+06	2.90752e+06	2.79247e+06	3.32533e+06	2.99515e+06	3.19752e+06	1.93656e+06	2.45371e+06	2.66815e+06	2.46535e+06
P32419	14	11	834.91	37220	Malate dehydrogenase, peroxisomal OS=Saccharomyces cerevisiae (strain ATCC 204508 / S288c) GN=MDH3 PE=1 SV=3	3.26553e+06	4.57913e+06	3.78622e+06	4.5272e+06	4.29156e+06	4.9074e+06	5.05056e+06	4.60007e+06	2.74804e+06	5.6644e+06	4.16554e+06	5.01617e+06	3.56721e+06	5.17757e+06	5.46907e+06	3.90049e+06
Q04179	2	2	102.05	38335	Uridine nucleosidase OS=Saccharomyces cerevisiae (strain ATCC 204508 / S288c) GN=URH1 PE=1 SV=2	226514	292948	264889	293425	364790	408004	367458	452184	190618	362378	291427	325117	303219	430466	397906	383416
Q08438	4	3	232.21	73718	Phosphopantothenoylcysteine decarboxylase subunit VHS3 OS=Saccharomyces cerevisiae (strain ATCC 204508 / S288c) GN=VHS3 PE=1 SV=1	132824	318754	357549	331517	505408	379821	437534	417070	111775	394301	393370	367323	420103	400732	473789	353642
P06169;P16467;Q07471	44	40	5993.45	61685	Pyruvate decarboxylase isozyme 1 OS=Saccharomyces cerevisiae (strain ATCC 204508 / S288c) GN=PDC1 PE=1 SV=7	1.85123e+09	2.02189e+09	2.21931e+09	2.1094e+09	1.62756e+09	1.8703e+09	1.83784e+09	1.67646e+09	1.55787e+09	2.50108e+09	2.44165e+09	2.33723e+09	1.35285e+09	1.97327e+09	1.99013e+09	1.4215e+09
Q05785	11	9	826.94	71878	Epsin-2 OS=Saccharomyces cerevisiae (strain ATCC 204508 / S288c) GN=ENT2 PE=1 SV=1	1.9762e+06	2.80435e+06	2.68159e+06	2.72512e+06	3.25636e+06	3.23998e+06	3.01121e+06	3.12203e+06	1.66304e+06	3.469e+06	2.95025e+06	3.01945e+06	2.70674e+06	3.41835e+06	3.26072e+06	2.64723e+06
Q08732	7	7	314.47	86726	Serine/threonine-protein kinase HRK1 OS=Saccharomyces cerevisiae (strain ATCC 204508 / S288c) GN=HRK1 PE=1 SV=1	1.0595e+06	1.09782e+06	1.10417e+06	1.12183e+06	1.32719e+06	1.41288e+06	1.36432e+06	1.0587e+06	891601	1.35801e+06	1.21479e+06	1.24299e+06	1.10318e+06	1.49067e+06	1.47738e+06	897693
P25367	7	7	541.9	42554	[PIN+] prion protein RNQ1 OS=Saccharomyces cerevisiae (strain ATCC 204508 / S288c) GN=RNQ1 PE=1 SV=2	9.30427e+06	9.63504e+06	9.50512e+06	1.01216e+07	1.05234e+07	1.21396e+07	1.10762e+07	1.30658e+07	7.82983e+06	1.19186e+07	1.04574e+07	1.12148e+07	8.74722e+06	1.2808e+07	1.1994e+07	1.10788e+07
P38793	3	3	141.37	56935	tRNA (guanine(37)-N1)-methyltransferase OS=Saccharomyces cerevisiae (strain ATCC 204508 / S288c) GN=TRM5 PE=1 SV=1	1.28313e+06	1.42809e+06	1.47586e+06	1.59507e+06	886743	960901	920275	1.1772e+06	1.07979e+06	1.76655e+06	1.62372e+06	1.76735e+06	737074	1.0138e+06	996531	998175
P53318	5	4	330.43	53665	Ubiquinone biosynthesis monooxygenase COQ6 OS=Saccharomyces cerevisiae (strain ATCC 204508 / S288c) GN=COQ6 PE=1 SV=1	586141	638121	598609	653875	768398	939711	667624	709059	493255	789358	658580	724499	638704	991446	722945	601226
P31384	7	7	346.54	95123	Glucose-repressible alcohol dehydrogenase transcriptional effector OS=Saccharomyces cerevisiae (strain ATCC 204508 / S288c) GN=CCR4 PE=1 SV=2	1.67021e+06	1.44944e+06	1.74272e+06	2.91632e+06	3.69617e+06	3.39479e+06	2.86731e+06	3.48382e+06	1.40554e+06	1.79296e+06	1.91732e+06	3.2313e+06	3.07231e+06	3.58169e+06	3.10491e+06	2.954e+06
P48353	3	3	157.67	24993	Protein HLJ1 OS=Saccharomyces cerevisiae (strain ATCC 204508 / S288c) GN=HLJ1 PE=1 SV=1	630379	694840	609781	728702	493982	558056	446318	573220	530483	859521	670872	807408	410605	588779	483301	486045
P25604	2	2	92.62	43417	Suppressor protein STP22 of temperature-sensitive alpha-factor receptor and arginine permease OS=Saccharomyces cerevisiae (strain ATCC 204508 / S288c) GN=STP22 PE=1 SV=3	491009	549947	474350	475658	839990	657594	678239	678948	413199	680287	521873	527033	698212	693798	734440	575694
P42941	3	3	142.73	34642	Phosphoserine phosphatase OS=Saccharomyces cerevisiae (strain ATCC 204508 / S288c) GN=SER2 PE=1 SV=1	2.24551e+06	2.77703e+06	2.55367e+06	2.86294e+06	2.20788e+06	1.87161e+06	2.04452e+06	2.54107e+06	1.88966e+06	3.4352e+06	2.80951e+06	3.17216e+06	1.83523e+06	1.97465e+06	2.21394e+06	2.15463e+06
P39954	32	32	2757.56	49721	Adenosylhomocysteinase OS=Saccharomyces cerevisiae (strain ATCC 204508 / S288c) GN=SAH1 PE=1 SV=1	7.627e+07	8.03017e+07	8.57419e+07	8.05964e+07	7.12728e+07	8.17053e+07	8.35185e+07	8.95717e+07	6.41835e+07	9.93336e+07	9.4332e+07	8.93015e+07	5.9243e+07	8.62036e+07	9.04391e+07	7.59497e+07
P39015	13	12	1472.96	29977	Suppressor protein STM1 OS=Saccharomyces cerevisiae (strain ATCC 204508 / S288c) GN=STM1 PE=1 SV=3	2.54258e+08	2.64768e+08	2.61981e+08	2.65406e+08	2.18203e+08	2.64118e+08	2.24769e+08	2.72246e+08	2.13966e+08	3.27519e+08	2.88228e+08	2.94072e+08	1.81373e+08	2.78659e+08	2.43394e+08	2.30843e+08
Q12029	10	10	593.37	35506	Probable mitochondrial transport protein FSF1 OS=Saccharomyces cerevisiae (strain ATCC 204508 / S288c) GN=FSF1 PE=1 SV=1	4.5621e+06	4.12538e+06	4.04862e+06	4.19059e+06	2.80291e+06	3.50538e+06	3.1723e+06	3.90344e+06	3.83914e+06	5.10312e+06	4.45423e+06	4.64321e+06	2.32982e+06	3.69837e+06	3.43516e+06	3.3098e+06
P53172	9	9	537.56	58290	Protein SDS23 OS=Saccharomyces cerevisiae (strain ATCC 204508 / S288c) GN=SDS23 PE=1 SV=2	2.84161e+06	2.99501e+06	2.99719e+06	3.10422e+06	3.35463e+06	3.46166e+06	3.5505e+06	4.17241e+06	2.3913e+06	3.70485e+06	3.29746e+06	3.43951e+06	2.78842e+06	3.65224e+06	3.8447e+06	3.53787e+06
Q12374	2	2	150.09	71273	Nuclear control of ATPase protein 2 OS=Saccharomyces cerevisiae (strain ATCC 204508 / S288c) GN=NCA2 PE=1 SV=1	397948	132069	175702	186862	950743	376847	632785	412043	334885	163370	193305	207044	790272	397595	685219	349380
Q12354	2	2	94.69	24799	Acyl-protein thioesterase 1 OS=Saccharomyces cerevisiae (strain ATCC 204508 / S288c) GN=YLR118C PE=1 SV=1	1.15616e+06	1.15023e+06	1.28655e+06	1.09855e+06	2.22616e+06	1.65833e+06	1.5667e+06	1.81807e+06	972942	1.42284e+06	1.41544e+06	1.2172e+06	1.85041e+06	1.74963e+06	1.69652e+06	1.54157e+06
P22517	3	3	120.68	50587	Calcium/calmodulin-dependent protein kinase II OS=Saccharomyces cerevisiae (strain ATCC 204508 / S288c) GN=CMK2 PE=1 SV=2	1.14711e+06	1.08641e+06	1.04213e+06	817250	1.30332e+06	1.28879e+06	1.0905e+06	1.17688e+06	965330	1.3439e+06	1.14653e+06	905519	1.08334e+06	1.35974e+06	1.18086e+06	997900
Q04969	2	2	100.31	20789	Signal peptidase complex subunit SPC2 OS=Saccharomyces cerevisiae (strain ATCC 204508 / S288c) GN=SPC2 PE=1 SV=1	2.26061e+06	2.31548e+06	2.37914e+06	2.17622e+06	3.12877e+06	3.08418e+06	2.65159e+06	3.61692e+06	1.90237e+06	2.86426e+06	2.61749e+06	2.41127e+06	2.60068e+06	3.25397e+06	2.87131e+06	3.06686e+06
P38067	4	4	272.88	54782	Succinate-semialdehyde dehydrogenase [NADP(+)] OS=Saccharomyces cerevisiae (strain ATCC 204508 / S288c) GN=UGA2 PE=1 SV=2	518848	1.02851e+06	410948	345983	803228	837190	910195	1.00677e+06	436627	1.27227e+06	452119	383352	667655	883281	985616	853658
P38115	13	11	926.92	39030	D-arabinose dehydrogenase [NAD(P)+] heavy chain OS=Saccharomyces cerevisiae (strain ATCC 204508 / S288c) GN=ARA1 PE=1 SV=1	7.56749e+06	9.84374e+06	1.06386e+07	1.12537e+07	2.07702e+07	1.72272e+07	1.9364e+07	1.09968e+07	6.36827e+06	1.21768e+07	1.17044e+07	1.24692e+07	1.72645e+07	1.81757e+07	2.09686e+07	9.32438e+06
Q02326	19	5	1110.08	19949	60S ribosomal protein L6-A OS=Saccharomyces cerevisiae (strain ATCC 204508 / S288c) GN=RPL6A PE=1 SV=2	8.83079e+07	9.19101e+07	8.59062e+07	9.39098e+07	6.91174e+07	7.28473e+07	6.82516e+07	8.98515e+07	7.43138e+07	1.13693e+08	9.45127e+07	1.04053e+08	5.74515e+07	7.68579e+07	7.39071e+07	7.6187e+07
P34760;Q04120	12	12	1471.85	21690	Peroxiredoxin TSA1 OS=Saccharomyces cerevisiae (strain ATCC 204508 / S288c) GN=TSA1 PE=1 SV=3	2.05459e+08	2.06757e+08	1.80189e+08	2.13073e+08	2.51569e+08	3.15373e+08	2.77877e+08	2.56875e+08	1.729e+08	2.55759e+08	1.98242e+08	2.36086e+08	2.09108e+08	3.32735e+08	3.00903e+08	2.1781e+08
P32352	4	4	387.19	24993	C-8 sterol isomerase OS=Saccharomyces cerevisiae (strain ATCC 204508 / S288c) GN=ERG2 PE=1 SV=1	1.04194e+07	1.07026e+07	1.02329e+07	1.18804e+07	9.63827e+06	1.06887e+07	1.01334e+07	1.1792e+07	8.76826e+06	1.32392e+07	1.12581e+07	1.31636e+07	8.01148e+06	1.12771e+07	1.09731e+07	9.99868e+06
P13663	16	15	880.66	40032	Aspartate-semialdehyde dehydrogenase OS=Saccharomyces cerevisiae (strain ATCC 204508 / S288c) GN=HOM2 PE=1 SV=1	3.88776e+07	4.54193e+07	3.96266e+07	4.06534e+07	4.62787e+07	4.69776e+07	4.87602e+07	4.86375e+07	3.27167e+07	5.61839e+07	4.35966e+07	4.50443e+07	3.84676e+07	4.95639e+07	5.28006e+07	4.12407e+07
P15565	8	8	452.44	64639	tRNA (guanine(26)-N(2))-dimethyltransferase, mitochondrial OS=Saccharomyces cerevisiae (strain ATCC 204508 / S288c) GN=TRM1 PE=1 SV=1	3.72409e+06	4.75175e+06	4.16861e+06	4.52196e+06	1.98972e+06	2.99112e+06	2.65832e+06	2.93236e+06	3.13393e+06	5.87794e+06	4.58624e+06	5.01036e+06	1.65388e+06	3.15579e+06	2.8786e+06	2.4864e+06
Q03723	2	2	92.17	38265	Dolichyl-diphosphooligosaccharide--protein glycosyltransferase subunit OST6 OS=Saccharomyces cerevisiae (strain ATCC 204508 / S288c) GN=OST6 PE=1 SV=1	3.60827e+06	4.54707e+06	4.78124e+06	9.2905e+06	2.38829e+06	1.6991e+06	1.76149e+06	1.74772e+06	3.03647e+06	5.62474e+06	5.26025e+06	1.02939e+07	1.98518e+06	1.79264e+06	1.90745e+06	1.48192e+06
P38266	3	3	155.1	103857	Altered inheritance of mitochondria protein 3 OS=Saccharomyces cerevisiae (strain ATCC 204508 / S288c) GN=AIM3 PE=1 SV=3	134697	236265	177106	154787	274595	376892	321949	565071	113351	292261	194849	171506	228248	397642	348627	479135
P38089	4	3	152.72	44547	Protein phosphatase 2C homolog 4 OS=Saccharomyces cerevisiae (strain ATCC 204508 / S288c) GN=PTC4 PE=1 SV=1	470798	404950	532648	533611	585610	608404	681844	652803	396191	500925	586012	591245	486767	641899	738343	553525
P34216	35	35	2773.62	150863	EH domain-containing and endocytosis protein 1 OS=Saccharomyces cerevisiae (strain ATCC 204508 / S288c) GN=EDE1 PE=1 SV=2	5.46962e+06	6.61729e+06	7.3403e+06	7.13875e+06	8.88268e+06	9.24782e+06	8.2712e+06	9.23099e+06	4.60285e+06	8.18562e+06	8.07569e+06	7.90979e+06	7.38342e+06	9.75695e+06	8.95657e+06	7.82715e+06
Q08924	4	3	177.64	115529	Regulator of Ty1 transposition protein 10 OS=Saccharomyces cerevisiae (strain ATCC 204508 / S288c) GN=RTT10 PE=1 SV=1	534162	680442	652286	797722	263037	382175	322708	375705	449513	841709	717635	883883	218640	403215	349448	318568
P29478	8	8	696.52	31321	Signal recognition particle subunit SEC65 OS=Saccharomyces cerevisiae (strain ATCC 204508 / S288c) GN=SEC65 PE=1 SV=1	2.11811e+06	2.01016e+06	2.02735e+06	1.84169e+06	2.6979e+06	2.37519e+06	2.55045e+06	2.43385e+06	1.78245e+06	2.48658e+06	2.23046e+06	2.04061e+06	2.24254e+06	2.50595e+06	2.76178e+06	2.06371e+06
Q08492	3	3	196.59	24370	Bud site selection protein 21 OS=Saccharomyces cerevisiae (strain ATCC 204508 / S288c) GN=BUD21 PE=1 SV=1	1.5608e+06	1.57586e+06	1.97062e+06	1.54691e+06	1.1405e+06	1.15981e+06	1.38922e+06	1.55316e+06	1.31346e+06	1.94934e+06	2.16804e+06	1.71399e+06	947999	1.22367e+06	1.50434e+06	1.31696e+06
P28707	6	6	373.73	24123	Co-chaperone protein SBA1 OS=Saccharomyces cerevisiae (strain ATCC 204508 / S288c) GN=SBA1 PE=1 SV=3	9.82941e+06	1.25013e+07	1.29104e+07	1.16259e+07	1.43363e+07	1.54535e+07	1.44634e+07	1.64832e+07	8.27174e+06	1.54642e+07	1.42039e+07	1.28816e+07	1.19166e+07	1.63043e+07	1.56619e+07	1.39765e+07
P0CX47	14	14	1134.28	17852	40S ribosomal protein S11-A OS=Saccharomyces cerevisiae (strain ATCC 204508 / S288c) GN=RPS11A PE=1 SV=1	2.53291e+08	2.66207e+08	2.82088e+08	2.63011e+08	1.74674e+08	2.30161e+08	2.17033e+08	2.40512e+08	2.13152e+08	3.29299e+08	3.1035e+08	2.91418e+08	1.45192e+08	2.42833e+08	2.35017e+08	2.03935e+08
P40463	4	4	243.26	47989	Protein VHS2 OS=Saccharomyces cerevisiae (strain ATCC 204508 / S288c) GN=VHS2 PE=1 SV=1	161407	364020	384394	349566	176317	366913	421681	274242	135829	450295	422905	387322	146557	387113	456622	232536
P32528	19	19	957.28	203473	Urea amidolyase OS=Saccharomyces cerevisiae (strain ATCC 204508 / S288c) GN=DUR1,2 PE=1 SV=2	1.00734e+06	1.06279e+06	1.81749e+06	1.08038e+06	1.08366e+06	873101	976908	922486	847704	1.31468e+06	1.99957e+06	1.19707e+06	900755	921169	1.05786e+06	782195
P07263	23	21	1938.47	60200	Histidine--tRNA ligase, mitochondrial OS=Saccharomyces cerevisiae (strain ATCC 204508 / S288c) GN=HTS1 PE=1 SV=2	1.9968e+07	2.07433e+07	1.80784e+07	2.20222e+07	1.48293e+07	1.70598e+07	1.46165e+07	1.86102e+07	1.68037e+07	2.56596e+07	1.98896e+07	2.44008e+07	1.23263e+07	1.7999e+07	1.58276e+07	1.578e+07
P27705	4	4	247.17	55726	Regulatory protein MIG1 OS=Saccharomyces cerevisiae (strain ATCC 204508 / S288c) GN=MIG1 PE=1 SV=1	386593	622379	554026	668654	858272	959161	812809	709516	325330	769886	609531	740874	713408	1.01197e+06	880161	601613
P25582	12	11	658.73	96767	27S pre-rRNA (guanosine(2922)-2'-O)-methyltransferase OS=Saccharomyces cerevisiae (strain ATCC 204508 / S288c) GN=SPB1 PE=1 SV=2	4.17683e+06	3.20148e+06	4.50521e+06	4.24213e+06	2.61474e+06	2.83391e+06	1.66571e+06	2.20492e+06	3.51493e+06	3.96024e+06	4.95657e+06	4.70031e+06	2.17341e+06	2.98993e+06	1.80373e+06	1.86959e+06
P38295	12	12	623.95	51508	Medium-chain fatty acid ethyl ester synthase/esterase 2 OS=Saccharomyces cerevisiae (strain ATCC 204508 / S288c) GN=EHT1 PE=1 SV=1	4.30355e+06	4.20814e+06	4.38264e+06	4.48706e+06	6.00642e+06	5.73554e+06	5.71067e+06	5.70081e+06	3.62157e+06	5.2055e+06	4.82172e+06	4.9717e+06	4.99262e+06	6.05131e+06	6.18387e+06	4.83383e+06
P00942	19	19	2818.9	26893	Triosephosphate isomerase OS=Saccharomyces cerevisiae (strain ATCC 204508 / S288c) GN=TPI1 PE=1 SV=2	4.40197e+08	5.05434e+08	4.60504e+08	4.24228e+08	3.58757e+08	3.8497e+08	3.95721e+08	4.06222e+08	3.70439e+08	6.25225e+08	5.0664e+08	4.70048e+08	2.98204e+08	4.06164e+08	4.28511e+08	3.44444e+08
P31412	19	18	1495.44	44218	V-type proton ATPase subunit C OS=Saccharomyces cerevisiae (strain ATCC 204508 / S288c) GN=VMA5 PE=1 SV=4	2.09275e+07	2.26134e+07	2.33709e+07	2.29402e+07	1.42978e+07	1.61679e+07	1.62348e+07	1.48618e+07	1.76112e+07	2.79728e+07	2.57123e+07	2.54179e+07	1.18846e+07	1.7058e+07	1.758e+07	1.26016e+07
P39102	4	4	214.07	52056	DnaJ protein homolog XDJ1 OS=Saccharomyces cerevisiae (strain ATCC 204508 / S288c) GN=XDJ1 PE=1 SV=2	541310	332018	382853	308510	721310	639517	613033	629731	455529	410708	421209	341831	599563	674725	663830	533962
P32324	67	66	7498.54	93686	Elongation factor 2 OS=Saccharomyces cerevisiae (strain ATCC 204508 / S288c) GN=EFT1 PE=1 SV=1	5.73838e+08	5.90303e+08	6.5628e+08	5.21979e+08	4.68408e+08	5.4225e+08	5.22282e+08	4.60858e+08	4.82902e+08	7.30208e+08	7.22029e+08	5.78357e+08	3.89348e+08	5.72103e+08	5.65559e+08	3.90771e+08
P32477	8	8	386.1	78717	Glutamate--cysteine ligase OS=Saccharomyces cerevisiae (strain ATCC 204508 / S288c) GN=GSH1 PE=1 SV=1	1.61839e+06	1.05224e+06	1.56249e+06	1.2789e+06	2.04617e+06	1.99884e+06	2.03989e+06	2.12658e+06	1.36192e+06	1.30163e+06	1.71903e+06	1.41703e+06	1.70081e+06	2.10888e+06	2.20892e+06	1.80317e+06
P40106	11	4	586.85	27967	Glycerol-1-phosphate phosphohydrolase 2 OS=Saccharomyces cerevisiae (strain ATCC 204508 / S288c) GN=GPP2 PE=1 SV=1	2.21586e+06	3.02738e+06	2.79727e+06	2.83828e+06	2.73283e+06	3.55054e+06	3.3852e+06	3.90717e+06	1.86471e+06	3.74488e+06	3.07751e+06	3.14483e+06	2.27157e+06	3.74601e+06	3.66571e+06	3.31297e+06
P36114	17	15	1042.44	82101	Mitochondrial outer membrane protein YKR018C OS=Saccharomyces cerevisiae (strain ATCC 204508 / S288c) GN=YKR018C PE=1 SV=1	2.79087e+06	2.85094e+06	3.13638e+06	3.46149e+06	4.45031e+06	4.74885e+06	3.6105e+06	4.28953e+06	2.3486e+06	3.52663e+06	3.4506e+06	3.83536e+06	3.69916e+06	5.0103e+06	3.90968e+06	3.63718e+06
P48231	14	14	669.54	132883	Tricalbin-2 OS=Saccharomyces cerevisiae (strain ATCC 204508 / S288c) GN=TCB2 PE=1 SV=1	3.09232e+06	3.17891e+06	2.71278e+06	2.48841e+06	2.36865e+06	2.13674e+06	2.42412e+06	2.51306e+06	2.60228e+06	3.93233e+06	2.98456e+06	2.75718e+06	1.96886e+06	2.25438e+06	2.62498e+06	2.13087e+06
P33314	3	2	187.74	127268	Inhibitory regulator protein BUD2/CLA2 OS=Saccharomyces cerevisiae (strain ATCC 204508 / S288c) GN=BUD2 PE=1 SV=2	95935.1	84678.5	91507.9	99145.3	182535	181020	175486	159630	80732.3	104748	100676	109854	151726	190986	190027	135354
P17555	8	8	637.15	57714	Adenylyl cyclase-associated protein OS=Saccharomyces cerevisiae (strain ATCC 204508 / S288c) GN=SRV2 PE=1 SV=1	3.01225e+07	2.7977e+07	2.75099e+07	2.76538e+07	4.03471e+07	3.61811e+07	3.05917e+07	3.27594e+07	2.5349e+07	3.46076e+07	3.0266e+07	3.06406e+07	3.35371e+07	3.8173e+07	3.31266e+07	2.77774e+07
P07172	4	4	224.91	43132	Histidinol-phosphate aminotransferase OS=Saccharomyces cerevisiae (strain ATCC 204508 / S288c) GN=HIS5 PE=1 SV=2	2.30992e+06	2.35009e+06	2.08286e+06	2.30935e+06	1.46048e+06	1.43445e+06	1.51778e+06	2.15224e+06	1.94387e+06	2.90707e+06	2.29153e+06	2.55878e+06	1.21397e+06	1.51342e+06	1.64355e+06	1.82492e+06
P32905	13	4	1270.9	28064	40S ribosomal protein S0-A OS=Saccharomyces cerevisiae (strain ATCC 204508 / S288c) GN=RPS0A PE=1 SV=3	5.42167e+08	6.04688e+08	5.78903e+08	5.85119e+08	4.61148e+08	5.2615e+08	4.78508e+08	4.74842e+08	4.5625e+08	7.48002e+08	6.369e+08	6.48317e+08	3.83314e+08	5.55117e+08	5.18158e+08	4.02628e+08
P39730	37	37	3005.31	112599	Eukaryotic translation initiation factor 5B OS=Saccharomyces cerevisiae (strain ATCC 204508 / S288c) GN=FUN12 PE=1 SV=2	2.32945e+07	2.59303e+07	2.28566e+07	2.51579e+07	2.12644e+07	2.12379e+07	2.18486e+07	2.18076e+07	1.9603e+07	3.2076e+07	2.51465e+07	2.78752e+07	1.76753e+07	2.24071e+07	2.3659e+07	1.84911e+07
P38791	30	30	2261.75	43264	Deoxyhypusine synthase OS=Saccharomyces cerevisiae (strain ATCC 204508 / S288c) GN=DYS1 PE=1 SV=1	1.81973e+07	1.86508e+07	2.12251e+07	1.91073e+07	1.27564e+07	1.5062e+07	1.45686e+07	1.67254e+07	1.53136e+07	2.30711e+07	2.33515e+07	2.11711e+07	1.06033e+07	1.58912e+07	1.57758e+07	1.41818e+07
P16140	35	35	3535.11	57770	V-type proton ATPase subunit B OS=Saccharomyces cerevisiae (strain ATCC 204508 / S288c) GN=VMA2 PE=1 SV=2	6.45991e+07	7.04307e+07	7.09297e+07	7.13711e+07	6.1305e+07	5.66126e+07	5.46227e+07	6.39199e+07	5.43621e+07	8.71231e+07	7.80358e+07	7.90798e+07	5.09576e+07	5.97294e+07	5.91489e+07	5.4199e+07
P39962	3	3	133.49	60964	Casein kinase I homolog 3 OS=Saccharomyces cerevisiae (strain ATCC 204508 / S288c) GN=YCK3 PE=1 SV=2	380992	312224	364954	338110	466269	521734	388685	654855	320616	386223	401517	374628	387570	550458	420893	555265
P24000	12	3	795.15	17537	60S ribosomal protein L24-B OS=Saccharomyces cerevisiae (strain ATCC 204508 / S288c) GN=RPL24B PE=1 SV=1	3.4186e+07	3.47684e+07	3.57552e+07	3.48562e+07	2.30853e+07	3.08039e+07	2.56243e+07	3.40804e+07	2.87685e+07	4.30087e+07	3.93373e+07	3.86209e+07	1.91889e+07	3.24998e+07	2.77476e+07	2.88975e+07
P07244	31	30	3033.72	86356	Bifunctional purine biosynthetic protein ADE5,7 OS=Saccharomyces cerevisiae (strain ATCC 204508 / S288c) GN=ADE5,7 PE=1 SV=1	5.00318e+07	5.24581e+07	3.42904e+07	3.86082e+07	2.57606e+07	3.0255e+07	3.15281e+07	1.72027e+07	4.21033e+07	6.48909e+07	3.77258e+07	4.27782e+07	2.14126e+07	3.19206e+07	3.41406e+07	1.45865e+07
P41940	20	20	1813.42	39712	Mannose-1-phosphate guanyltransferase OS=Saccharomyces cerevisiae (strain ATCC 204508 / S288c) GN=PSA1 PE=1 SV=2	1.63288e+08	1.59452e+08	1.38904e+08	1.50131e+08	1.62715e+08	1.76548e+08	1.87871e+08	1.67941e+08	1.37412e+08	1.97242e+08	1.5282e+08	1.66346e+08	1.35252e+08	1.86268e+08	2.03439e+08	1.42401e+08
Q12400	3	3	149.42	34670	tRNA (guanine(9)-N1)-methyltransferase OS=Saccharomyces cerevisiae (strain ATCC 204508 / S288c) GN=TRM10 PE=1 SV=1	496766	559726	498988	508144	501976	519207	447568	500905	418043	692384	548980	563028	417250	547791	484654	424727
P40341	9	6	471.85	93503	Mitochondrial respiratory chain complexes assembly protein YTA12 OS=Saccharomyces cerevisiae (strain ATCC 204508 / S288c) GN=YTA12 PE=1 SV=2	1.33134e+06	1.16987e+06	1.19318e+06	1.01293e+06	1.91067e+06	2.0052e+06	2.34674e+06	2.18132e+06	1.12037e+06	1.44713e+06	1.31271e+06	1.12233e+06	1.58818e+06	2.11559e+06	2.5412e+06	1.84958e+06
P36049	11	11	1043.78	49704	rRNA-processing protein EBP2 OS=Saccharomyces cerevisiae (strain ATCC 204508 / S288c) GN=EBP2 PE=1 SV=1	4.65608e+06	8.99083e+06	6.54621e+06	8.30628e+06	3.19534e+06	3.86854e+06	4.12685e+06	4.07647e+06	3.91823e+06	1.11217e+07	7.20205e+06	9.20343e+06	2.65602e+06	4.08153e+06	4.46881e+06	3.45652e+06
P53738	4	4	276.99	15342	Multifunctional methyltransferase subunit TRM112 OS=Saccharomyces cerevisiae (strain ATCC 204508 / S288c) GN=TRM112 PE=1 SV=1	2.94454e+06	3.89755e+06	3.42274e+06	3.3979e+06	2.53256e+06	3.27091e+06	3.04093e+06	3.56134e+06	2.47792e+06	4.82128e+06	3.76565e+06	3.7649e+06	2.1051e+06	3.45099e+06	3.29291e+06	3.01974e+06
P29704	13	13	760.07	52143	Squalene synthase OS=Saccharomyces cerevisiae (strain ATCC 204508 / S288c) GN=ERG9 PE=1 SV=2	6.02607e+06	5.96116e+06	6.62947e+06	6.03366e+06	8.28809e+06	8.47763e+06	7.42849e+06	7.58013e+06	5.07112e+06	7.37399e+06	7.29364e+06	6.68534e+06	6.88919e+06	8.94436e+06	8.04403e+06	6.42735e+06
P47079	21	21	1476.82	61965	T-complex protein 1 subunit theta OS=Saccharomyces cerevisiae (strain ATCC 204508 / S288c) GN=CCT8 PE=1 SV=1	1.78447e+07	1.58037e+07	1.60202e+07	1.72877e+07	1.35275e+07	1.34135e+07	1.2482e+07	1.59205e+07	1.50169e+07	1.95492e+07	1.76252e+07	1.91549e+07	1.12443e+07	1.41519e+07	1.35163e+07	1.34993e+07
P47057	2	2	225.8	49143	Sorting nexin-4 OS=Saccharomyces cerevisiae (strain ATCC 204508 / S288c) GN=SNX4 PE=1 SV=1	538839	520482	626758	661065	1.05789e+06	782793	703998	810746	453449	643838	689550	732465	879330	825889	762333	687449
P38011	22	22	3050.52	34898	Guanine nucleotide-binding protein subunit beta-like protein OS=Saccharomyces cerevisiae (strain ATCC 204508 / S288c) GN=ASC1 PE=1 SV=4	5.61893e+08	5.70007e+08	5.96359e+08	5.06692e+08	4.7956e+08	5.41556e+08	4.73377e+08	4.36534e+08	4.7285e+08	7.05102e+08	6.56105e+08	5.61419e+08	3.98618e+08	5.71372e+08	5.12602e+08	3.70146e+08
P08456	5	5	300.42	31070	CDP-diacylglycerol--serine O-phosphatidyltransferase OS=Saccharomyces cerevisiae (strain ATCC 204508 / S288c) GN=CHO1 PE=1 SV=3	1.28994e+06	1.39055e+06	1.23838e+06	819899	1.91432e+06	1.74117e+06	1.95044e+06	1.31063e+06	1.08553e+06	1.72011e+06	1.36244e+06	908455	1.59121e+06	1.83703e+06	2.11206e+06	1.11131e+06
P17891	6	6	408.47	26516	Clathrin light chain OS=Saccharomyces cerevisiae (strain ATCC 204508 / S288c) GN=CLC1 PE=1 SV=1	6.36897e+06	7.44793e+06	6.60926e+06	8.30724e+06	1.05724e+07	9.57416e+06	9.45566e+06	1.3005e+07	5.35968e+06	9.21312e+06	7.27141e+06	9.20449e+06	8.78796e+06	1.01013e+07	1.02392e+07	1.10272e+07
P38238	3	3	144.5	35135	tRNA (cytidine(32)/guanosine(34)-2'-O)-methyltransferase OS=Saccharomyces cerevisiae (strain ATCC 204508 / S288c) GN=TRM7 PE=1 SV=1	726904	778017	858801	715485	437639	611466	641374	653093	611711	962411	944840	792763	363772	645129	694520	553771
Q08689	2	2	113.59	19885	N-terminal acetyltransferase A complex subunit NAT5 OS=Saccharomyces cerevisiae (strain ATCC 204508 / S288c) GN=NAT5 PE=1 SV=1	1.06174e+06	1.13584e+06	1.05283e+06	1.03671e+06	644667	722235	767846	948929	893489	1.40504e+06	1.1583e+06	1.14869e+06	535857	761997	831472	804616
P40486	3	2	179.19	59285	Protein SHQ1 OS=Saccharomyces cerevisiae (strain ATCC 204508 / S288c) GN=SHQ1 PE=1 SV=1	143488	144588	128756	107117	83901.6	73858.4	111491	108187	120749	178856	141656	118687	69740.3	77924.6	120729	91733.9
P32608	14	13	652.35	66101	Retrograde regulation protein 2 OS=Saccharomyces cerevisiae (strain ATCC 204508 / S288c) GN=RTG2 PE=1 SV=2	2.32716e+06	2.47257e+06	2.8613e+06	2.45045e+06	3.62199e+06	2.97153e+06	3.27537e+06	3.56401e+06	1.95837e+06	3.05858e+06	3.14796e+06	2.71512e+06	3.01065e+06	3.13512e+06	3.54677e+06	3.022e+06
Q03661	6	6	346.18	187425	Silent chromatin protein ESC1 OS=Saccharomyces cerevisiae (strain ATCC 204508 / S288c) GN=ESC1 PE=1 SV=1	289201	266503	308951	313100	419075	397006	539763	374336	243371	329665	339903	346918	348342	418863	584489	317407
P40011	2	2	57.96	25718	4-hydroxy-4-methyl-2-oxoglutarate aldolase OS=Saccharomyces cerevisiae (strain ATCC 204508 / S288c) GN=YER010C PE=1 SV=1	247263	239097	260066	260130	317307	336145	326294	329612	208079	295764	286121	288226	263751	354651	353332	279485
Q99296	2	2	63.85	83318	Uncharacterized protein YLR149C OS=Saccharomyces cerevisiae (strain ATCC 204508 / S288c) GN=YLR149C PE=1 SV=1	1346.96	10261.6	708.315	3461.82	32218.6	27582.2	29141.6	6444.79	1133.51	12693.7	779.278	3835.73	26780.5	29100.7	31556.4	5464.67
Q07896	7	7	453.43	75991	Nucleolar complex-associated protein 3 OS=Saccharomyces cerevisiae (strain ATCC 204508 / S288c) GN=NOC3 PE=1 SV=1	1.38108e+06	1.57315e+06	1.7512e+06	1.91367e+06	679033	899066	645958	996136	1.16222e+06	1.946e+06	1.92664e+06	2.12036e+06	564423	948564	699483	844644
P53272	3	3	121.08	45732	Uncharacterized protein YGR122W OS=Saccharomyces cerevisiae (strain ATCC 204508 / S288c) GN=YGR122W PE=1 SV=1	206694	167393	145456	135785	246887	228934	271250	212565	173940	207065	160028	150451	205216	241538	293726	180238
P23542	17	17	1260.98	46257	Aspartate aminotransferase, cytoplasmic OS=Saccharomyces cerevisiae (strain ATCC 204508 / S288c) GN=AAT2 PE=1 SV=3	2.06444e+07	2.44871e+07	2.48405e+07	2.1885e+07	2.82194e+07	2.93496e+07	2.56176e+07	2.77375e+07	1.73729e+07	3.02907e+07	2.73291e+07	2.42488e+07	2.34564e+07	3.09655e+07	2.77403e+07	2.35192e+07
P38169	5	5	287.83	52795	Kynurenine 3-monooxygenase OS=Saccharomyces cerevisiae (strain ATCC 204508 / S288c) GN=BNA4 PE=1 SV=1	545862	470589	561191	578571	609661	582163	649514	609757	459359	582121	617414	641061	506759	614214	703334	517026
Q04228	3	3	121.6	67061	UBX domain-containing protein 2 OS=Saccharomyces cerevisiae (strain ATCC 204508 / S288c) GN=UBX2 PE=1 SV=1	193047	165337	119950	137400	279854	275080	264808	307334	162455	204523	131967	152240	232619	290224	286751	260595
Q12458	14	12	1032.59	34847	Putative reductase 1 OS=Saccharomyces cerevisiae (strain ATCC 204508 / S288c) GN=YPR1 PE=1 SV=1	8.68075e+06	1.04393e+07	9.409e+06	1.01826e+07	1.13137e+07	1.03847e+07	1.06995e+07	9.93066e+06	7.30511e+06	1.29134e+07	1.03516e+07	1.12824e+07	9.40412e+06	1.09564e+07	1.15861e+07	8.42041e+06
P29029	2	2	143.73	59663	Endochitinase OS=Saccharomyces cerevisiae (strain ATCC 204508 / S288c) GN=CTS1 PE=1 SV=2	2.42147e+06	2.35391e+06	1.96812e+06	2.21059e+06	4.1584e+06	3.09297e+06	4.72522e+06	2.64978e+06	2.03774e+06	2.9118e+06	2.16529e+06	2.44935e+06	3.45653e+06	3.26325e+06	5.11676e+06	2.2468e+06
P0CX35	27	26	2160.54	29449	40S ribosomal protein S4-A OS=Saccharomyces cerevisiae (strain ATCC 204508 / S288c) GN=RPS4A PE=1 SV=1	2.40385e+08	2.50992e+08	2.62235e+08	2.67776e+08	1.49497e+08	1.72872e+08	1.8225e+08	2.03936e+08	2.02291e+08	3.10478e+08	2.88507e+08	2.96698e+08	1.24264e+08	1.82389e+08	1.97352e+08	1.72921e+08
Q05040	4	4	198.3	59379	Factor arrest protein 8 OS=Saccharomyces cerevisiae (strain ATCC 204508 / S288c) GN=FAR8 PE=1 SV=1	783309	621416	760424	815554	851489	903846	932122	1.22394e+06	659178	768695	836607	903641	707770	953606	1.00936e+06	1.03781e+06
P26785	11	5	882.2	22235	60S ribosomal protein L16-B OS=Saccharomyces cerevisiae (strain ATCC 204508 / S288c) GN=RPL16B PE=1 SV=3	1.08536e+08	1.15574e+08	1.10482e+08	1.18804e+08	9.09852e+07	9.83435e+07	9.09017e+07	1.14365e+08	9.13367e+07	1.42966e+08	1.21551e+08	1.31635e+08	7.56283e+07	1.03758e+08	9.84341e+07	9.69724e+07
Q92331	5	5	325.52	76551	Vacuolar protein sorting-associated protein 5 OS=Saccharomyces cerevisiae (strain ATCC 204508 / S288c) GN=VPS5 PE=1 SV=1	1.54109e+06	1.76932e+06	1.35986e+06	1.26252e+06	1.854e+06	1.83865e+06	1.9562e+06	1.61573e+06	1.29687e+06	2.18866e+06	1.4961e+06	1.39888e+06	1.54107e+06	1.93987e+06	2.11829e+06	1.37001e+06
Q04371	14	11	661.53	54494	UPF0364 protein YMR027W OS=Saccharomyces cerevisiae (strain ATCC 204508 / S288c) GN=YMR027W PE=1 SV=1	2.43688e+06	2.71132e+06	2.64837e+06	3.29451e+06	3.74125e+06	3.85895e+06	4.6006e+06	3.86445e+06	2.05071e+06	3.35391e+06	2.9137e+06	3.65035e+06	3.10978e+06	4.0714e+06	4.98182e+06	3.27675e+06
P0CX41	13	13	1272.91	14578	60S ribosomal protein L23-A OS=Saccharomyces cerevisiae (strain ATCC 204508 / S288c) GN=RPL23A PE=1 SV=1	2.26635e+08	2.30508e+08	2.32085e+08	2.39769e+08	1.50805e+08	1.70506e+08	1.55204e+08	1.89638e+08	1.9072e+08	2.85139e+08	2.55337e+08	2.65666e+08	1.25352e+08	1.79893e+08	1.68065e+08	1.60798e+08
P32465	7	3	470.18	64246	Low-affinity glucose transporter HXT1 OS=Saccharomyces cerevisiae (strain ATCC 204508 / S288c) GN=HXT1 PE=1 SV=1	2.38744e+06	1.38141e+06	1.89738e+06	1.76179e+06	1.54338e+06	1.3964e+06	1.48707e+06	1.62458e+06	2.0091e+06	1.70881e+06	2.08747e+06	1.95208e+06	1.28288e+06	1.47328e+06	1.61029e+06	1.37751e+06
Q12415	4	3	196.73	49343	Transcription factor tau 55 kDa subunit OS=Saccharomyces cerevisiae (strain ATCC 204508 / S288c) GN=TFC7 PE=1 SV=1	916504	939996	924281	936310	627954	724052	664964	621977	771266	1.16278e+06	1.01688e+06	1.03744e+06	521964	763914	720065	527387
P00815	34	32	3193.06	88293	Histidine biosynthesis trifunctional protein OS=Saccharomyces cerevisiae (strain ATCC 204508 / S288c) GN=HIS4 PE=1 SV=3	2.81675e+07	3.07422e+07	2.63488e+07	3.07855e+07	2.13372e+07	2.65791e+07	2.48105e+07	2.59194e+07	2.37038e+07	3.80283e+07	2.89886e+07	3.41106e+07	1.77358e+07	2.80424e+07	2.68664e+07	2.19776e+07
P47123	3	3	199.51	24406	Nuclear import protein MOG1 OS=Saccharomyces cerevisiae (strain ATCC 204508 / S288c) GN=MOG1 PE=1 SV=1	515019	917173	721430	897732	969664	984475	1.14189e+06	1.25904e+06	433404	1.13455e+06	793707	994694	806000	1.03867e+06	1.23651e+06	1.06757e+06
P36161	8	7	456.33	134092	Nucleoporin NUP133 OS=Saccharomyces cerevisiae (strain ATCC 204508 / S288c) GN=NUP133 PE=1 SV=1	2.3225e+06	2.15778e+06	2.3145e+06	2.36333e+06	1.92369e+06	1.80921e+06	1.82235e+06	1.94845e+06	1.95445e+06	2.66919e+06	2.54638e+06	2.61859e+06	1.599e+06	1.90882e+06	1.97335e+06	1.65213e+06
P25297	16	16	1434.46	65025	Inorganic phosphate transporter PHO84 OS=Saccharomyces cerevisiae (strain ATCC 204508 / S288c) GN=PHO84 PE=1 SV=2	7.54286e+06	9.85728e+06	6.91024e+06	1.34903e+07	7.74839e+06	9.53561e+06	1.01323e+07	1.46843e+07	6.34755e+06	1.21935e+07	7.60254e+06	1.49473e+07	6.44057e+06	1.00606e+07	1.09719e+07	1.24511e+07
P36973	2	2	63.93	20030	Adenine phosphoribosyltransferase 2 OS=Saccharomyces cerevisiae (strain ATCC 204508 / S288c) GN=APT2 PE=1 SV=2	583719	710127	440397	477730	879467	978980	1.21176e+06	882908	491217	878431	484519	529328	731026	1.03288e+06	1.31217e+06	748636
P34217	5	5	273.7	73788	RNA-binding protein PIN4 OS=Saccharomyces cerevisiae (strain ATCC 204508 / S288c) GN=PIN4 PE=1 SV=1	2.54304e+06	2.79589e+06	3.5023e+06	2.75252e+06	3.74402e+06	4.339e+06	4.11488e+06	5.19322e+06	2.14005e+06	3.45853e+06	3.85318e+06	3.04982e+06	3.11208e+06	4.57788e+06	4.45585e+06	4.40344e+06
Q06408	14	14	1190.14	72023	Transaminated amino acid decarboxylase OS=Saccharomyces cerevisiae (strain ATCC 204508 / S288c) GN=ARO10 PE=1 SV=1	1.55919e+06	1.12434e+06	1.3552e+06	3.37179e+06	8.22816e+06	5.19288e+06	4.37003e+06	3.66073e+06	1.31211e+06	1.39081e+06	1.49097e+06	3.73597e+06	6.83937e+06	5.47877e+06	4.73214e+06	3.10401e+06
P07275	18	18	1045.96	64680	Delta-1-pyrroline-5-carboxylate dehydrogenase, mitochondrial OS=Saccharomyces cerevisiae (strain ATCC 204508 / S288c) GN=PUT2 PE=1 SV=2	4.89473e+06	6.37641e+06	6.00231e+06	5.57964e+06	8.91125e+06	8.74831e+06	9.09005e+06	4.89714e+06	4.11906e+06	7.88765e+06	6.60365e+06	6.18228e+06	7.40717e+06	9.22995e+06	9.84327e+06	4.15238e+06
P40210	4	3	238.01	56395	Protein SIP5 OS=Saccharomyces cerevisiae (strain ATCC 204508 / S288c) GN=SIP5 PE=1 SV=1	526153	382195	385365	358066	827979	603068	769224	742829	442774	472777	423973	396740	688229	636269	832964	629860
P22803	9	5	602.3	11311	Thioredoxin-2 OS=Saccharomyces cerevisiae (strain ATCC 204508 / S288c) GN=TRX2 PE=1 SV=3	3.05829e+07	4.46479e+07	5.05754e+07	4.85667e+07	5.69557e+07	6.83511e+07	7.52714e+07	6.4966e+07	2.57364e+07	5.52297e+07	5.56423e+07	5.38123e+07	4.73424e+07	7.21141e+07	8.15086e+07	5.5086e+07
P17423	10	10	705.22	39144	Homoserine kinase OS=Saccharomyces cerevisiae (strain ATCC 204508 / S288c) GN=THR1 PE=1 SV=4	3.03765e+07	3.12771e+07	3.08337e+07	3.81994e+07	2.54498e+07	2.83705e+07	2.77098e+07	2.99822e+07	2.55627e+07	3.869e+07	3.39228e+07	4.23252e+07	2.11543e+07	2.99324e+07	3.00059e+07	2.54225e+07
P32378	4	3	118.82	41317	4-hydroxybenzoate polyprenyltransferase, mitochondrial OS=Saccharomyces cerevisiae (strain ATCC 204508 / S288c) GN=COQ2 PE=3 SV=1	301642	246487	191879	257448	454134	397718	342392	743136	253841	304906	211103	285254	377483	419614	370763	630120
P40160	5	5	259.95	49379	Serine/threonine-protein kinase RIO2 OS=Saccharomyces cerevisiae (strain ATCC 204508 / S288c) GN=RIO2 PE=1 SV=1	1.45009e+06	1.70167e+06	1.70772e+06	1.67953e+06	999452	1.20262e+06	1.08869e+06	1.29787e+06	1.22029e+06	2.10498e+06	1.8788e+06	1.86093e+06	830759	1.26883e+06	1.1789e+06	1.10049e+06
P11745	16	16	1017.88	46073	Ran GTPase-activating protein 1 OS=Saccharomyces cerevisiae (strain ATCC 204508 / S288c) GN=RNA1 PE=1 SV=2	1.39077e+07	1.60196e+07	1.49685e+07	1.51359e+07	1.08244e+07	1.30698e+07	1.17481e+07	1.39171e+07	1.17038e+07	1.98164e+07	1.64682e+07	1.67707e+07	8.99744e+06	1.37894e+07	1.27216e+07	1.18006e+07
P26783	16	16	1427.83	25080	40S ribosomal protein S5 OS=Saccharomyces cerevisiae (strain ATCC 204508 / S288c) GN=RPS5 PE=1 SV=3	2.55197e+08	2.78018e+08	3.12696e+08	2.98334e+08	1.70959e+08	2.31776e+08	1.96512e+08	2.58761e+08	2.14756e+08	3.4391e+08	3.44023e+08	3.30557e+08	1.42104e+08	2.44537e+08	2.12795e+08	2.19409e+08
P10664	19	2	2316.11	39125	60S ribosomal protein L4-A OS=Saccharomyces cerevisiae (strain ATCC 204508 / S288c) GN=RPL4A PE=1 SV=4	3.48565e+08	3.78957e+08	3.73688e+08	4.01844e+08	2.3735e+08	2.97446e+08	2.95067e+08	3.18926e+08	2.93328e+08	4.68772e+08	4.11126e+08	4.45246e+08	1.97289e+08	3.13822e+08	3.19517e+08	2.70424e+08
P49626	19	2	2317.96	39095	60S ribosomal protein L4-B OS=Saccharomyces cerevisiae (strain ATCC 204508 / S288c) GN=RPL4B PE=1 SV=2	1.65356e+08	1.79774e+08	1.77274e+08	1.90631e+08	1.12597e+08	1.41106e+08	1.39977e+08	1.51296e+08	1.39152e+08	2.22381e+08	1.95035e+08	2.11221e+08	9.35922e+07	1.48874e+08	1.51576e+08	1.28287e+08
P53063	4	4	214.72	44881	Decapping nuclease RAI1 OS=Saccharomyces cerevisiae (strain ATCC 204508 / S288c) GN=RAI1 PE=1 SV=3	1.20847e+06	1.55963e+06	1.37466e+06	1.40668e+06	970034	1.08828e+06	1.05533e+06	1.20854e+06	1.01696e+06	1.92928e+06	1.51238e+06	1.55862e+06	806307	1.14819e+06	1.14278e+06	1.02474e+06
Q06146	11	11	950.28	36034	Uncharacterized protein YLR257W OS=Saccharomyces cerevisiae (strain ATCC 204508 / S288c) GN=YLR257W PE=1 SV=1	3.78113e+06	4.67839e+06	5.00137e+06	4.67038e+06	5.2601e+06	5.24771e+06	5.78973e+06	5.7459e+06	3.18194e+06	5.78719e+06	5.50243e+06	5.17482e+06	4.37227e+06	5.53662e+06	6.26948e+06	4.87207e+06
P50111	2	2	120	103296	Protein ZDS1 OS=Saccharomyces cerevisiae (strain ATCC 204508 / S288c) GN=ZDS1 PE=1 SV=1	136624	210754	139063	159360	215440	232868	225505	223646	114974	260704	152995	176572	179077	245688	244191	189634
P39984	3	3	173.93	45146	Histone acetyltransferase type B subunit 2 OS=Saccharomyces cerevisiae (strain ATCC 204508 / S288c) GN=HAT2 PE=1 SV=1	625899	687627	528372	596674	973025	918077	856781	811599	526713	850598	581307	661119	808793	968621	927776	688172
P53270	3	2	164.34	53689	Uncharacterized protein YGR117C OS=Saccharomyces cerevisiae (strain ATCC 204508 / S288c) GN=YGR117C PE=1 SV=1	655485	519378	624033	717230	422959	385874	382837	445268	551610	642473	686552	794697	351569	407118	414560	377552
Q08979	5	5	333.85	75786	Kelch repeat-containing protein 3 OS=Saccharomyces cerevisiae (strain ATCC 204508 / S288c) GN=KEL3 PE=1 SV=1	955047	965915	1.4691e+06	1.44781e+06	880609	1.03152e+06	903996	1.07621e+06	803701	1.19484e+06	1.61629e+06	1.60418e+06	731976	1.0883e+06	978903	912538
P32623	5	5	311.04	50559	Probable glycosidase CRH2 OS=Saccharomyces cerevisiae (strain ATCC 204508 / S288c) GN=UTR2 PE=1 SV=3	8.58603e+06	9.42458e+06	1.18726e+07	9.20192e+06	6.41587e+06	7.18779e+06	6.75263e+06	8.02512e+06	7.22541e+06	1.16583e+07	1.30621e+07	1.01958e+07	5.33297e+06	7.58351e+06	7.31216e+06	6.80466e+06
P35691	13	13	881.57	18786	Translationally-controlled tumor protein homolog OS=Saccharomyces cerevisiae (strain ATCC 204508 / S288c) GN=TMA19 PE=1 SV=1	1.52081e+08	1.7315e+08	1.72229e+08	1.79456e+08	1.23319e+08	1.35407e+08	1.41064e+08	1.5045e+08	1.27981e+08	2.14188e+08	1.89484e+08	1.98838e+08	1.02504e+08	1.42862e+08	1.52753e+08	1.2757e+08
P15442	2	2	75.88	190474	Serine/threonine-protein kinase GCN2 OS=Saccharomyces cerevisiae (strain ATCC 204508 / S288c) GN=GCN2 PE=1 SV=3	256534	177682	140446	171365	333877	331026	244603	316251	215881	219794	154517	189873	277524	349250	264871	268156
P53909	5	5	285.83	40009	Adenine deaminase OS=Saccharomyces cerevisiae (strain ATCC 204508 / S288c) GN=AAH1 PE=1 SV=1	5.49813e+06	9.62091e+06	8.47648e+06	7.58352e+06	2.59696e+06	3.75313e+06	3.85678e+06	3.27332e+06	4.62684e+06	1.19011e+07	9.3257e+06	8.40261e+06	2.15863e+06	3.95976e+06	4.17636e+06	2.77551e+06
Q03758	4	4	287.14	105519	Ubiquitin ligase-binding protein BUL2 OS=Saccharomyces cerevisiae (strain ATCC 204508 / S288c) GN=BUL2 PE=1 SV=1	588243	502296	537966	505709	480621	522546	494338	686990	495024	621342	591862	560329	399499	551314	535300	582513
Q12040	5	5	373.56	26331	Broad-specificity phosphatase YOR283W OS=Saccharomyces cerevisiae (strain ATCC 204508 / S288c) GN=YOR283W PE=1 SV=1	3.60472e+06	4.19036e+06	4.18316e+06	4.01998e+06	2.03985e+06	3.30186e+06	3.12748e+06	3.24447e+06	3.03348e+06	5.18349e+06	4.60225e+06	4.45417e+06	1.69556e+06	3.48364e+06	3.38663e+06	2.75105e+06
P53136	6	6	383.22	52045	Ribosome biogenesis protein NSA1 OS=Saccharomyces cerevisiae (strain ATCC 204508 / S288c) GN=NSA1 PE=1 SV=1	1.32852e+06	1.78288e+06	2.03638e+06	1.87193e+06	988138	1.38247e+06	1.32091e+06	1.04655e+06	1.11799e+06	2.20543e+06	2.24039e+06	2.07412e+06	821355	1.45858e+06	1.43036e+06	887392
P40202	11	11	722.9	27712	Superoxide dismutase 1 copper chaperone OS=Saccharomyces cerevisiae (strain ATCC 204508 / S288c) GN=CCS1 PE=1 SV=1	1.10958e+07	1.19926e+07	1.07971e+07	1.14424e+07	7.505e+06	9.33869e+06	9.66787e+06	1.07163e+07	9.33743e+06	1.48349e+07	1.18788e+07	1.26783e+07	6.23827e+06	9.85283e+06	1.0469e+07	9.08653e+06
P21339	4	4	251.8	130460	Morphogenesis-related protein MSB1 OS=Saccharomyces cerevisiae (strain ATCC 204508 / S288c) GN=MSB1 PE=1 SV=1	172403	206657	266736	294229	281403	278845	180066	223032	145083	255636	293459	326008	233907	294197	194987	189113
Q05498	2	2	66.79	21939	rRNA-processing protein FCF1 OS=Saccharomyces cerevisiae (strain ATCC 204508 / S288c) GN=FCF1 PE=1 SV=1	596761	680423	803516	655031	283894	488404	469568	587306	502192	841686	884017	725779	235977	515293	508478	497989
P40159	7	7	1209.3	20139	Uncharacterized protein YNL208W OS=Saccharomyces cerevisiae (strain ATCC 204508 / S288c) GN=YNL208W PE=1 SV=2	1.19183e+07	1.65026e+07	1.10585e+07	9.93534e+06	3.31623e+07	3.12331e+07	3.47234e+07	1.41361e+07	1.00297e+07	2.04137e+07	1.21664e+07	1.10084e+07	2.7565e+07	3.29526e+07	3.76006e+07	1.19863e+07
Q03940	15	14	1074.83	50593	RuvB-like protein 1 OS=Saccharomyces cerevisiae (strain ATCC 204508 / S288c) GN=RVB1 PE=1 SV=1	1.02116e+07	8.91426e+06	1.11669e+07	1.03053e+07	1.2971e+07	1.09673e+07	1.12239e+07	1.1417e+07	8.59335e+06	1.1027e+07	1.22857e+07	1.14183e+07	1.07817e+07	1.15711e+07	1.2154e+07	9.68069e+06
P18900	2	2	69.75	52812	Hexaprenyl pyrophosphate synthase, mitochondrial OS=Saccharomyces cerevisiae (strain ATCC 204508 / S288c) GN=COQ1 PE=1 SV=1	229537	294956	289890	345748	478836	409269	365267	405868	193162	364862	318933	383091	398015	431801	395533	344143
P43587	2	2	169.9	18347	Type 1 phosphatases regulator YPI1 OS=Saccharomyces cerevisiae (strain ATCC 204508 / S288c) GN=YPI1 PE=1 SV=1	340205	566685	554524	581426	758213	674285	813803	840972	286293	700992	610079	644224	630238	711407	881237	713078
P49723	20	20	1385.02	40143	Ribonucleoside-diphosphate reductase small chain 2 OS=Saccharomyces cerevisiae (strain ATCC 204508 / S288c) GN=RNR4 PE=1 SV=1	3.826e+07	4.89277e+07	5.16143e+07	4.70276e+07	4.92699e+07	5.6175e+07	5.52219e+07	5.24831e+07	3.2197e+07	6.05238e+07	5.67853e+07	5.2107e+07	4.09538e+07	5.92677e+07	5.97978e+07	4.45015e+07
Q06214	2	2	68.57	55857	WD repeat-containing protein JIP5 OS=Saccharomyces cerevisiae (strain ATCC 204508 / S288c) GN=JIP5 PE=1 SV=2	3.49894e+06	2.91345e+06	3.48253e+06	3.09473e+06	2.81796e+06	2.21573e+06	2.11024e+06	2.84269e+06	2.94447e+06	3.60396e+06	3.83143e+06	3.42899e+06	2.34233e+06	2.33771e+06	2.2851e+06	2.41037e+06
P25555	8	8	474.32	49041	Single-strand telomeric DNA-binding protein GBP2 OS=Saccharomyces cerevisiae (strain ATCC 204508 / S288c) GN=GBP2 PE=1 SV=1	4.37267e+06	3.31422e+06	4.10897e+06	4.0763e+06	2.94805e+06	3.40264e+06	3.31441e+06	3.53525e+06	3.67973e+06	4.09971e+06	4.52063e+06	4.51657e+06	2.45046e+06	3.58997e+06	3.58905e+06	2.99761e+06
Q12438	3	3	125.43	25824	Monothiol glutaredoxin-6 OS=Saccharomyces cerevisiae (strain ATCC 204508 / S288c) GN=GRX6 PE=1 SV=1	632661	589509	596782	638324	782990	756220	785794	950971	532404	729225	656571	707268	650833	797853	850907	806347
P33333	9	9	509.19	34150	Probable 1-acyl-sn-glycerol-3-phosphate acyltransferase OS=Saccharomyces cerevisiae (strain ATCC 204508 / S288c) GN=SLC1 PE=1 SV=1	4.12141e+06	4.85209e+06	4.21497e+06	4.94748e+06	4.51971e+06	4.96855e+06	5.10815e+06	5.64322e+06	3.46829e+06	6.00205e+06	4.63725e+06	5.48185e+06	3.75685e+06	5.24209e+06	5.53142e+06	4.785e+06
P52893	8	8	557.68	66722	Probable alanine aminotransferase, mitochondrial OS=Saccharomyces cerevisiae (strain ATCC 204508 / S288c) GN=ALT1 PE=1 SV=1	6.84869e+06	8.88876e+06	6.9908e+06	6.65268e+06	8.90104e+06	8.65733e+06	8.80572e+06	6.29606e+06	5.76338e+06	1.09954e+07	7.69118e+06	7.37122e+06	7.39868e+06	9.13396e+06	9.53538e+06	5.33856e+06
P38819	3	3	71.69	24461	Protein ERP5 OS=Saccharomyces cerevisiae (strain ATCC 204508 / S288c) GN=ERP5 PE=1 SV=1	329886	377472	354760	412021	486519	522837	494904	410433	277609	466935	390301	456522	404402	551621	535913	348015
P38325	5	5	402.4	14885	Mitochondrial outer membrane protein OM14 OS=Saccharomyces cerevisiae (strain ATCC 204508 / S288c) GN=OM14 PE=1 SV=1	629829	432887	1.06738e+06	836838	5.58386e+06	3.69976e+06	4.61148e+06	1.34013e+06	530020	535483	1.17432e+06	927223	4.64139e+06	3.90344e+06	4.9936e+06	1.13632e+06
P40498	2	2	138.72	84111	U3 small nucleolar RNA-associated protein 25 OS=Saccharomyces cerevisiae (strain ATCC 204508 / S288c) GN=UTP25 PE=1 SV=1	971775	1.34769e+06	1.00752e+06	1.0452e+06	527805	586317	550923	914314	817778	1.6671e+06	1.10846e+06	1.15809e+06	438720	618596	596574	775265
P32317	3	3	181.95	58741	Protein AFG1 OS=Saccharomyces cerevisiae (strain ATCC 204508 / S288c) GN=AFG1 PE=1 SV=1	808431	1.18162e+06	776692	960475	1.63952e+06	1.40913e+06	2.11391e+06	1.22002e+06	680319	1.46166e+06	854505	1.06421e+06	1.36279e+06	1.48671e+06	2.28907e+06	1.03448e+06
Q99258	14	14	1326.17	22895	3,4-dihydroxy-2-butanone 4-phosphate synthase OS=Saccharomyces cerevisiae (strain ATCC 204508 / S288c) GN=RIB3 PE=1 SV=1	6.49361e+06	7.1019e+06	7.6045e+06	6.17616e+06	8.03837e+06	8.00479e+06	8.18947e+06	7.93888e+06	5.46457e+06	8.78509e+06	8.36636e+06	6.84323e+06	6.68162e+06	8.44549e+06	8.86807e+06	6.73154e+06
P16370	7	7	617.1	35674	DNA-directed RNA polymerase II subunit RPB3 OS=Saccharomyces cerevisiae (strain ATCC 204508 / S288c) GN=RPB3 PE=1 SV=2	6.39652e+06	5.68591e+06	6.20774e+06	6.42474e+06	7.05248e+06	8.42696e+06	7.2805e+06	8.02525e+06	5.38286e+06	7.0335e+06	6.82966e+06	7.11867e+06	5.86213e+06	8.8909e+06	7.88378e+06	6.80477e+06
P38962	3	3	90.87	23361	Golgi apparatus membrane protein TVP23 OS=Saccharomyces cerevisiae (strain ATCC 204508 / S288c) GN=TVP23 PE=1 SV=1	831073	939617	946730	947580	1.58216e+06	1.44355e+06	1.28827e+06	2.99019e+06	699373	1.16231e+06	1.04158e+06	1.04993e+06	1.31512e+06	1.52302e+06	1.39502e+06	2.53544e+06
P06245	4	3	178.82	44249	cAMP-dependent protein kinase type 2 OS=Saccharomyces cerevisiae (strain ATCC 204508 / S288c) GN=TPK2 PE=1 SV=2	563348	802289	714339	741617	1.21382e+06	1.10657e+06	1.20448e+06	598332	474075	992435	785906	821718	1.00895e+06	1.16749e+06	1.30429e+06	507338
Q12753	3	3	141.4	77250	Transcriptional activator HAA1 OS=Saccharomyces cerevisiae (strain ATCC 204508 / S288c) GN=HAA1 PE=1 SV=1	61949.7	119299	194475	156919	266975	271632	275859	267329	52132.5	147574	213958	173867	221913	286587	298718	226674
Q12271;P50942	16	16	935.59	125013	Polyphosphatidylinositol phosphatase INP53 OS=Saccharomyces cerevisiae (strain ATCC 204508 / S288c) GN=INP53 PE=1 SV=1	2.48731e+06	2.87567e+06	2.85665e+06	2.93551e+06	1.90127e+06	1.99883e+06	2.09665e+06	2.18016e+06	2.09314e+06	3.55722e+06	3.14285e+06	3.25257e+06	1.58036e+06	2.10888e+06	2.27038e+06	1.84861e+06
P40462	16	14	1083.17	108339	Protein TMA108 OS=Saccharomyces cerevisiae (strain ATCC 204508 / S288c) GN=TMA108 PE=1 SV=1	5.39758e+06	4.99779e+06	5.1616e+06	5.75391e+06	5.38058e+06	5.39349e+06	5.04786e+06	5.00804e+06	4.54223e+06	6.18228e+06	5.67871e+06	6.37538e+06	4.47242e+06	5.69043e+06	5.46614e+06	4.24642e+06
P46969	7	7	381.16	26235	Ribulose-phosphate 3-epimerase OS=Saccharomyces cerevisiae (strain ATCC 204508 / S288c) GN=RPE1 PE=1 SV=1	8.48711e+06	8.00904e+06	8.19118e+06	7.75909e+06	6.41783e+06	6.94404e+06	6.46014e+06	6.61721e+06	7.14216e+06	9.90722e+06	9.01181e+06	8.59713e+06	5.3346e+06	7.32634e+06	6.99544e+06	5.61087e+06
P36130	4	3	148.45	73186	CCR4-associated factor 4 OS=Saccharomyces cerevisiae (strain ATCC 204508 / S288c) GN=CAF4 PE=1 SV=3	267095	246497	184910	211746	152159	151035	189212	182779	224769	304918	203436	234616	126476	159350	204891	154982
P05738	13	2	1223.37	21613	60S ribosomal protein L9-A OS=Saccharomyces cerevisiae (strain ATCC 204508 / S288c) GN=RPL9A PE=1 SV=2	1.86207e+08	2.22999e+08	2.26725e+08	2.39372e+08	1.37736e+08	1.7837e+08	1.58824e+08	1.88897e+08	1.56699e+08	2.75851e+08	2.49439e+08	2.65226e+08	1.14488e+08	1.88191e+08	1.71985e+08	1.6017e+08
P38355	4	4	202.17	47647	Uncharacterized transporter YBR287W OS=Saccharomyces cerevisiae (strain ATCC 204508 / S288c) GN=YBR287W PE=1 SV=1	1.31461e+06	1.22523e+06	1.12599e+06	1.07874e+06	1.29379e+06	1.15041e+06	1.06614e+06	1.57996e+06	1.10629e+06	1.51562e+06	1.2388e+06	1.19525e+06	1.07542e+06	1.21375e+06	1.15448e+06	1.33968e+06
P07262	25	17	2485.15	49881	NADP-specific glutamate dehydrogenase 1 OS=Saccharomyces cerevisiae (strain ATCC 204508 / S288c) GN=GDH1 PE=1 SV=2	3.84538e+07	3.69576e+07	4.79223e+07	3.6088e+07	5.13527e+07	6.55346e+07	4.89706e+07	7.49873e+07	3.23601e+07	4.57168e+07	5.27234e+07	3.99858e+07	4.26852e+07	6.91426e+07	5.30284e+07	6.35832e+07
P40579	5	5	286.73	27520	Uncharacterized oxidoreductase YIR035C OS=Saccharomyces cerevisiae (strain ATCC 204508 / S288c) GN=YIR035C PE=1 SV=1	970885	1.33401e+06	1.3574e+06	1.42901e+06	694046	1.20187e+06	835239	976787	817029	1.65017e+06	1.49339e+06	1.58336e+06	576902	1.26804e+06	904449	828237
P22276	10	9	425.24	130457	DNA-directed RNA polymerase III subunit RPC2 OS=Saccharomyces cerevisiae (strain ATCC 204508 / S288c) GN=RET1 PE=1 SV=2	3.23385e+06	2.62278e+06	2.86581e+06	2.55369e+06	2.07315e+06	2.38406e+06	2.32275e+06	2.45922e+06	2.72138e+06	3.24439e+06	3.15293e+06	2.82951e+06	1.72324e+06	2.51531e+06	2.51522e+06	2.08522e+06
P06786	13	13	833.88	164626	DNA topoisomerase 2 OS=Saccharomyces cerevisiae (strain ATCC 204508 / S288c) GN=TOP2 PE=1 SV=2	2.32255e+06	2.4653e+06	2.13003e+06	2.45972e+06	1.98953e+06	2.08192e+06	1.93704e+06	2.12179e+06	1.95449e+06	3.04959e+06	2.34343e+06	2.72539e+06	1.65373e+06	2.19654e+06	2.09755e+06	1.79911e+06
P40531	15	14	1373.98	36818	Protein GVP36 OS=Saccharomyces cerevisiae (strain ATCC 204508 / S288c) GN=GVP36 PE=1 SV=1	3.0094e+07	3.40092e+07	3.50704e+07	3.22351e+07	4.35295e+07	4.26623e+07	3.94072e+07	3.81897e+07	2.5325e+07	4.20696e+07	3.8584e+07	3.57167e+07	3.61823e+07	4.5011e+07	4.26726e+07	3.23818e+07
P02406	8	8	558.16	16711	60S ribosomal protein L28 OS=Saccharomyces cerevisiae (strain ATCC 204508 / S288c) GN=RPL28 PE=1 SV=3	1.48765e+08	1.63639e+08	1.57546e+08	1.56494e+08	1.18532e+08	1.38633e+08	1.2639e+08	1.54102e+08	1.2519e+08	2.02422e+08	1.7333e+08	1.73397e+08	9.85258e+07	1.46265e+08	1.36863e+08	1.30666e+08
P53265	2	2	138.18	46981	Uncharacterized protein YGR111W OS=Saccharomyces cerevisiae (strain ATCC 204508 / S288c) GN=YGR111W PE=1 SV=1	1.03666e+06	739406	663781	760378	1.14085e+06	1.00431e+06	863911	1.27083e+06	872385	914649	730282	842505	948294	1.05961e+06	935497	1.07757e+06
Q08687	2	2	76.25	20883	Translation machinery-associated protein 16 OS=Saccharomyces cerevisiae (strain ATCC 204508 / S288c) GN=TMA16 PE=1 SV=2	1.91477e+06	1.95597e+06	2.27411e+06	1.90567e+06	1.44296e+06	1.63541e+06	1.50139e+06	1.47563e+06	1.61134e+06	2.41955e+06	2.50194e+06	2.1115e+06	1.19941e+06	1.72545e+06	1.6258e+06	1.25122e+06
P53889	3	3	208.61	29002	Uncharacterized mitochondrial hydrolase FMP41 OS=Saccharomyces cerevisiae (strain ATCC 204508 / S288c) GN=FMP41 PE=1 SV=1	4.77747e+06	3.42484e+06	4.55235e+06	4.78065e+06	6.57547e+06	6.82701e+06	6.31336e+06	5.63014e+06	4.02039e+06	4.23654e+06	5.00843e+06	5.297e+06	5.46563e+06	7.20287e+06	6.8365e+06	4.77391e+06
P33334	6	5	265.5	279898	Pre-mRNA-splicing factor 8 OS=Saccharomyces cerevisiae (strain ATCC 204508 / S288c) GN=PRP8 PE=1 SV=1	251859	273781	254583	270072	204481	272655	248561	297537	211947	338668	280089	299242	169968	287666	269157	252288
P38689	9	8	664.56	35387	Ribose-phosphate pyrophosphokinase 3 OS=Saccharomyces cerevisiae (strain ATCC 204508 / S288c) GN=PRS3 PE=1 SV=1	5.39574e+06	6.32188e+06	5.68122e+06	5.80194e+06	2.84577e+06	3.91687e+06	3.45034e+06	3.91141e+06	4.54068e+06	7.8202e+06	6.2504e+06	6.4286e+06	2.36545e+06	4.13251e+06	3.73624e+06	3.31657e+06
P04147	38	37	3269.07	64475	Polyadenylate-binding protein, cytoplasmic and nuclear OS=Saccharomyces cerevisiae (strain ATCC 204508 / S288c) GN=PAB1 PE=1 SV=4	9.0954e+07	9.52315e+07	1.02121e+08	9.42785e+07	7.30033e+07	8.585e+07	8.1756e+07	9.76794e+07	7.65405e+07	1.17802e+08	1.12352e+08	1.04461e+08	6.06815e+07	9.05764e+07	8.85305e+07	8.28244e+07
P38250	11	10	843.87	106244	Increased sodium tolerance protein 2 OS=Saccharomyces cerevisiae (strain ATCC 204508 / S288c) GN=IST2 PE=1 SV=2	5.78245e+06	4.34316e+06	5.69768e+06	5.6048e+06	7.4376e+06	6.50942e+06	6.17063e+06	6.38779e+06	4.86611e+06	5.37251e+06	6.26851e+06	6.21016e+06	6.18224e+06	6.8678e+06	6.68194e+06	5.41634e+06
P38131	7	6	525.52	54977	Probable mannosyltransferase KTR4 OS=Saccharomyces cerevisiae (strain ATCC 204508 / S288c) GN=KTR4 PE=1 SV=1	2.20457e+06	2.1511e+06	2.22456e+06	1.9872e+06	1.88419e+06	2.01059e+06	2.12324e+06	1.94549e+06	1.85522e+06	2.66092e+06	2.44743e+06	2.20183e+06	1.56617e+06	2.12128e+06	2.29917e+06	1.64962e+06
P47096	4	3	215.45	20507	3-hydroxyanthranilate 3,4-dioxygenase OS=Saccharomyces cerevisiae (strain ATCC 204508 / S288c) GN=BNA1 PE=1 SV=1	156930	207723	214051	316776	435172	280720	320674	273619	132062	256955	235496	350991	361721	296174	347245	232007
P01123	13	11	1148.28	23428	GTP-binding protein YPT1 OS=Saccharomyces cerevisiae (strain ATCC 204508 / S288c) GN=YPT1 PE=1 SV=2	2.21933e+07	1.87356e+07	2.06967e+07	1.79322e+07	2.99969e+07	2.75277e+07	2.80986e+07	2.47289e+07	1.86764e+07	2.3176e+07	2.27702e+07	1.9869e+07	2.49338e+07	2.90432e+07	3.04269e+07	2.09681e+07
P37303	18	16	1913.16	43187	Low specificity L-threonine aldolase OS=Saccharomyces cerevisiae (strain ATCC 204508 / S288c) GN=GLY1 PE=1 SV=2	3.39635e+07	3.24251e+07	3.57169e+07	3.21714e+07	2.41764e+07	3.00352e+07	2.6844e+07	3.26299e+07	2.85813e+07	4.011e+07	3.92952e+07	3.56462e+07	2.00958e+07	3.16888e+07	2.90684e+07	2.76675e+07
P53039	2	2	54.84	27177	Protein transport protein YIP1 OS=Saccharomyces cerevisiae (strain ATCC 204508 / S288c) GN=YIP1 PE=1 SV=1	196097	277229	219822	241551	85559.5	135775	138105	150677	165022	342934	241845	267640	71118.3	143250	149549	127762
Q02753	12	2	739.4	18288	60S ribosomal protein L21-A OS=Saccharomyces cerevisiae (strain ATCC 204508 / S288c) GN=RPL21A PE=1 SV=1	8.80974e+07	8.26267e+07	9.72631e+07	9.02604e+07	4.99116e+07	7.3788e+07	5.89325e+07	7.75296e+07	7.41366e+07	1.0221e+08	1.07007e+08	1.00009e+08	4.14873e+07	7.78504e+07	6.38158e+07	6.57389e+07
P40081	3	3	149.76	20656	Putative magnesium-dependent phosphatase YER134C OS=Saccharomyces cerevisiae (strain ATCC 204508 / S288c) GN=YER134C PE=1 SV=1	402640	559764	504571	523621	514325	604606	578128	913591	338834	692431	555121	580177	427515	637893	626033	774653
P60010	36	36	4724.04	41891	Actin OS=Saccharomyces cerevisiae (strain ATCC 204508 / S288c) GN=ACT1 PE=1 SV=1	2.90858e+08	3.0921e+08	3.14201e+08	3.09308e+08	3.04489e+08	3.16433e+08	3.18237e+08	3.06976e+08	2.44766e+08	3.82495e+08	3.45679e+08	3.42716e+08	2.53096e+08	3.33854e+08	3.44606e+08	2.60291e+08
P25332	2	2	120.8	37129	Probable ribokinase OS=Saccharomyces cerevisiae (strain ATCC 204508 / S288c) GN=RBK1 PE=1 SV=2	332110	544468	467573	465865	553025	578279	598991	908501	279481	673509	514417	516182	459682	610116	648625	770337
P09880	6	5	240.64	96474	tRNA ligase OS=Saccharomyces cerevisiae (strain ATCC 204508 / S288c) GN=TRL1 PE=1 SV=1	822868	875835	819210	819779	514280	670497	636097	653713	692468	1.08341e+06	901283	908322	427477	707411	688805	554297
P48836	5	5	260.75	12705	V-type proton ATPase subunit G OS=Saccharomyces cerevisiae (strain ATCC 204508 / S288c) GN=VMA10 PE=1 SV=1	8.36647e+06	1.16294e+07	1.20052e+07	9.96733e+06	8.14166e+06	8.28874e+06	9.06828e+06	8.84645e+06	7.04064e+06	1.43856e+07	1.32079e+07	1.10439e+07	6.76747e+06	8.74507e+06	9.8197e+06	7.50108e+06
P38132	3	3	139.05	95568	DNA replication licensing factor MCM7 OS=Saccharomyces cerevisiae (strain ATCC 204508 / S288c) GN=MCM7 PE=1 SV=4	384774	318020	342848	333600	486902	510068	476532	562214	323799	393392	377196	369631	404720	538149	516019	476713
P39724	2	2	88.96	13461	Altered inheritance of mitochondria protein 1 OS=Saccharomyces cerevisiae (strain ATCC 204508 / S288c) GN=AIM1 PE=1 SV=1	427610	685730	639292	588165	725427	962328	885576	1.09928e+06	359847	848252	703339	651691	602986	1.01531e+06	958957	932102
Q04868	2	2	60.49	30783	Elongator complex protein 6 OS=Saccharomyces cerevisiae (strain ATCC 204508 / S288c) GN=ELP6 PE=1 SV=1	196763	221067	220246	211454	139600	153773	141556	177799	165582	273461	242311	234293	116037	162239	153286	150760
P54781	8	8	379.34	61979	Cytochrome P450 61 OS=Saccharomyces cerevisiae (strain ATCC 204508 / S288c) GN=ERG5 PE=1 SV=1	4.29268e+06	4.01913e+06	4.78786e+06	4.02874e+06	3.34369e+06	4.4651e+06	3.65654e+06	3.15566e+06	3.61242e+06	4.97168e+06	5.26753e+06	4.46388e+06	2.77932e+06	4.71092e+06	3.95953e+06	2.67575e+06
Q12355	2	2	175.45	45977	Cell wall mannoprotein PST1 OS=Saccharomyces cerevisiae (strain ATCC 204508 / S288c) GN=PST1 PE=1 SV=1	395051	499721	278607	542705	939221	1.33562e+06	1.23349e+06	733526	332448	618157	306519	601322	780694	1.40915e+06	1.33569e+06	621972
P39743	19	19	1569.4	52799	Reduced viability upon starvation protein 167 OS=Saccharomyces cerevisiae (strain ATCC 204508 / S288c) GN=RVS167 PE=1 SV=1	8.40816e+06	8.2999e+06	7.62797e+06	8.06406e+06	1.10604e+07	1.03039e+07	8.90617e+06	9.04928e+06	7.07572e+06	1.0267e+07	8.39217e+06	8.93504e+06	9.19353e+06	1.08712e+07	9.64416e+06	7.67307e+06
P38772	3	3	143.55	43105	Box C/D snoRNA protein 1 OS=Saccharomyces cerevisiae (strain ATCC 204508 / S288c) GN=BCD1 PE=1 SV=1	210936	282140	361668	265884	73239.3	164372	163803	147335	177509	349009	397902	294601	60877.6	173422	177376	124928
P39078	17	17	1224.67	57967	T-complex protein 1 subunit delta OS=Saccharomyces cerevisiae (strain ATCC 204508 / S288c) GN=CCT4 PE=1 SV=2	1.35852e+07	1.16038e+07	1.23825e+07	1.31173e+07	1.03806e+07	1.13932e+07	1.10407e+07	1.28761e+07	1.14324e+07	1.4354e+07	1.36231e+07	1.45341e+07	8.6285e+06	1.20205e+07	1.19556e+07	1.09179e+07
Q02205	4	4	317.81	20344	Protein MEH1 OS=Saccharomyces cerevisiae (strain ATCC 204508 / S288c) GN=MEH1 PE=1 SV=1	644982	882867	742240	684576	1.03651e+06	974724	1.0105e+06	1.05383e+06	542772	1.09211e+06	816602	758516	861566	1.02839e+06	1.09423e+06	893562
P27692	28	27	2004.2	115751	Transcription elongation factor SPT5 OS=Saccharomyces cerevisiae (strain ATCC 204508 / S288c) GN=SPT5 PE=1 SV=1	5.78855e+06	6.80926e+06	5.37491e+06	6.37123e+06	5.7396e+06	4.92157e+06	5.86634e+06	6.28585e+06	4.87124e+06	8.42309e+06	5.9134e+06	7.05937e+06	4.77084e+06	5.19253e+06	6.35243e+06	5.3299e+06
P53094	6	6	358.21	167780	Negative regulator of sporulation MDS3 OS=Saccharomyces cerevisiae (strain ATCC 204508 / S288c) GN=MDS3 PE=1 SV=2	283545	221663	326212	337413	478369	374731	368122	539613	238612	274198	358894	373856	397627	395361	398625	457549
P40002	2	2	253.24	72546	Transcriptional regulator MIT1 OS=Saccharomyces cerevisiae (strain ATCC 204508 / S288c) GN=MIT1 PE=1 SV=1	2.79896e+06	2.55896e+06	2.24417e+06	2.75193e+06	3.41509e+06	3.08754e+06	3.27887e+06	3.44024e+06	2.35541e+06	3.16545e+06	2.469e+06	3.04916e+06	2.83868e+06	3.25753e+06	3.55057e+06	2.91705e+06
P40467	4	3	243.15	109455	Activator of stress genes 1 OS=Saccharomyces cerevisiae (strain ATCC 204508 / S288c) GN=ASG1 PE=1 SV=1	879791	1.07183e+06	1.03479e+06	1.21232e+06	880716	970656	984288	991753	740370	1.32586e+06	1.13846e+06	1.34326e+06	732064	1.02409e+06	1.06585e+06	840928
P35194	19	16	836.62	288463	U3 small nucleolar RNA-associated protein 20 OS=Saccharomyces cerevisiae (strain ATCC 204508 / S288c) GN=UTP20 PE=1 SV=3	1.50391e+06	1.73535e+06	1.69773e+06	1.78608e+06	1.74941e+06	1.24399e+06	2.00879e+06	1.43248e+06	1.26558e+06	2.14664e+06	1.86781e+06	1.979e+06	1.45413e+06	1.31248e+06	2.17524e+06	1.21463e+06
P32527	19	19	1838.28	49047	Zuotin OS=Saccharomyces cerevisiae (strain ATCC 204508 / S288c) GN=ZUO1 PE=1 SV=1	1.0737e+08	1.0965e+08	1.147e+08	1.29644e+08	7.17106e+07	8.80124e+07	1.08593e+08	1.0328e+08	9.03551e+07	1.35637e+08	1.26191e+08	1.43646e+08	5.96069e+07	9.28579e+07	1.17592e+08	8.75732e+07
P38695	7	3	504.01	67063	Probable glucose transporter HXT5 OS=Saccharomyces cerevisiae (strain ATCC 204508 / S288c) GN=HXT5 PE=1 SV=1	107843	100880	102811	118861	740517	733460	783481	905713	90752.8	124789	113111	131699	615529	773840	848402	767973
P33322	20	20	1592.45	55184	H/ACA ribonucleoprotein complex subunit 4 OS=Saccharomyces cerevisiae (strain ATCC 204508 / S288c) GN=CBF5 PE=1 SV=1	2.15934e+07	2.61966e+07	3.00948e+07	2.57066e+07	1.27747e+07	1.84473e+07	1.80678e+07	2.02256e+07	1.81715e+07	3.24053e+07	3.31098e+07	2.84832e+07	1.06185e+07	1.94629e+07	1.9565e+07	1.71497e+07
P40317;P36069	5	5	245.81	101533	Protein SOK1 OS=Saccharomyces cerevisiae (strain ATCC 204508 / S288c) GN=SOK1 PE=1 SV=2	498535	507135	401872	463651	584442	560213	574102	686451	419532	627329	442134	513730	485797	591055	621674	582056
Q06698	5	4	220.48	163741	Putative ATP-dependent RNA helicase YLR419W OS=Saccharomyces cerevisiae (strain ATCC 204508 / S288c) GN=YLR419W PE=1 SV=1	536168	522155	489904	462396	286863	386884	291490	448280	451201	645908	538985	512338	238445	408183	315644	380106
P33418	3	3	229.57	127822	Exportin-T OS=Saccharomyces cerevisiae (strain ATCC 204508 / S288c) GN=LOS1 PE=1 SV=1	603274	608349	624572	620860	406489	462000	418462	565673	507673	752531	687144	687918	337880	487435	453136	479646
Q12028	7	7	389.77	94079	AP-1 complex subunit gamma-1 OS=Saccharomyces cerevisiae (strain ATCC 204508 / S288c) GN=APL4 PE=1 SV=1	960866	1.12094e+06	1.10712e+06	1.21985e+06	1.17214e+06	1.29154e+06	1.22088e+06	1.55372e+06	808598	1.38661e+06	1.21803e+06	1.35161e+06	974303	1.36265e+06	1.32205e+06	1.31743e+06
Q03088	12	11	942.72	92258	Styryl dye vacuolar localization protein 3 OS=Saccharomyces cerevisiae (strain ATCC 204508 / S288c) GN=SVL3 PE=1 SV=1	2.28061e+06	2.14788e+06	2.26831e+06	2.15185e+06	2.61887e+06	2.69382e+06	2.64683e+06	2.92499e+06	1.9192e+06	2.65693e+06	2.49557e+06	2.38427e+06	2.17684e+06	2.84212e+06	2.86615e+06	2.48016e+06
P32319;P40438	19	19	1387.24	179775	Vacuolar protein sorting/targeting protein VPS10 OS=Saccharomyces cerevisiae (strain ATCC 204508 / S288c) GN=PEP1 PE=1 SV=1	2.42091e+06	2.31137e+06	2.44563e+06	2.51038e+06	2.85117e+06	3.01752e+06	2.71357e+06	2.99005e+06	2.03727e+06	2.85917e+06	2.69064e+06	2.78152e+06	2.36993e+06	3.18365e+06	2.93842e+06	2.53533e+06
Q04344	5	5	339.58	17782	Hit family protein 1 OS=Saccharomyces cerevisiae (strain ATCC 204508 / S288c) GN=HNT1 PE=1 SV=2	1.02084e+07	1.2655e+07	1.02446e+07	1.11426e+07	1.50955e+07	1.41724e+07	1.35096e+07	1.46867e+07	8.59064e+06	1.56543e+07	1.1271e+07	1.23461e+07	1.25476e+07	1.49526e+07	1.46291e+07	1.24531e+07
Q04781	8	8	413.42	181270	E3 ubiquitin-protein ligase listerin OS=Saccharomyces cerevisiae (strain ATCC 204508 / S288c) GN=RKR1 PE=1 SV=1	576104	518784	536052	498010	388033	395412	479054	332211	484809	641738	589757	551799	322539	417181	518750	281688
P04161	5	5	260.56	23810	Phosphoribosylglycinamide formyltransferase OS=Saccharomyces cerevisiae (strain ATCC 204508 / S288c) GN=ADE8 PE=1 SV=1	2.56547e+06	2.10514e+06	2.10734e+06	2.17649e+06	1.41963e+06	1.63175e+06	1.41133e+06	2.0037e+06	2.15892e+06	2.60406e+06	2.31846e+06	2.41157e+06	1.18001e+06	1.72158e+06	1.52828e+06	1.69898e+06
P40518	5	5	322.76	17124	Actin-related protein 2/3 complex subunit 5 OS=Saccharomyces cerevisiae (strain ATCC 204508 / S288c) GN=ARC15 PE=1 SV=1	1.80491e+06	2.92759e+06	2.7607e+06	2.81457e+06	3.34723e+06	4.16807e+06	4.14762e+06	4.42297e+06	1.51889e+06	3.62145e+06	3.03728e+06	3.11857e+06	2.78227e+06	4.39754e+06	4.4913e+06	3.75032e+06
P38809	7	7	452.1	40696	Uncharacterized protein YHR097C OS=Saccharomyces cerevisiae (strain ATCC 204508 / S288c) GN=YHR097C PE=1 SV=1	1.06983e+06	1.19776e+06	1.11763e+06	1.0175e+06	1.68114e+06	1.09429e+06	1.10083e+06	1.32861e+06	900294	1.48164e+06	1.2296e+06	1.1274e+06	1.39739e+06	1.15454e+06	1.19205e+06	1.12655e+06
Q12403	2	2	133.98	26893	Protein ERP3 OS=Saccharomyces cerevisiae (strain ATCC 204508 / S288c) GN=ERP3 PE=1 SV=1	482310	258313	306934	447188	641130	688625	551343	721228	405879	319534	337684	495487	532917	726536	597028	611544
Q12481	3	3	89.43	36103	rRNA biogenesis protein RRP36 OS=Saccharomyces cerevisiae (strain ATCC 204508 / S288c) GN=RRP36 PE=1 SV=1	251021	232597	247145	308703	215312	196724	153342	241546	211242	287724	271905	342046	178970	207555	166049	204812
sp|ADH1_YEAST|	26	19	2879.02	37256	sp|ADH1_YEAST|	8.49557e+08	9.84735e+08	8.71993e+08	9.54577e+08	6.30858e+08	6.60766e+08	7.17331e+08	7.7465e+08	7.14928e+08	1.21812e+09	9.59353e+08	1.05768e+09	5.24378e+08	6.97144e+08	7.76771e+08	6.56841e+08
P53090	21	21	2039.33	56371	Aromatic/aminoadipate aminotransferase 1 OS=Saccharomyces cerevisiae (strain ATCC 204508 / S288c) GN=ARO8 PE=1 SV=1	2.27545e+07	2.58495e+07	2.42284e+07	2.64696e+07	2.3981e+07	2.52342e+07	2.38155e+07	2.23086e+07	1.91486e+07	3.19759e+07	2.66558e+07	2.93286e+07	1.99333e+07	2.66235e+07	2.57889e+07	1.8916e+07
P40850	8	8	455.28	94720	Protein MKT1 OS=Saccharomyces cerevisiae (strain ATCC 204508 / S288c) GN=MKT1 PE=1 SV=2	2.04642e+06	2.17718e+06	1.93322e+06	2.19578e+06	727685	1.32958e+06	716194	1.3969e+06	1.72213e+06	2.69318e+06	2.1269e+06	2.43294e+06	604862	1.40278e+06	775540	1.18446e+06
Q05892	3	3	104.88	31619	Uncharacterized protein YLR290C, mitochondrial OS=Saccharomyces cerevisiae (strain ATCC 204508 / S288c) GN=YLR290C PE=1 SV=1	115138	191658	83197.1	129775	243134	202998	193064	187964	96892.3	237082	91532.3	143792	202096	214174	209061	159379
P40084	2	2	97.73	26565	RNA polymerase II subunit B1 CTD phosphatase RTR1 OS=Saccharomyces cerevisiae (strain ATCC 204508 / S288c) GN=RTR1 PE=1 SV=1	414373	400196	472110	457920	715885	543995	569321	652146	348708	495044	519409	507379	595055	573945	616496	552968
P29465	2	2	78.13	132772	Chitin synthase 3 OS=Saccharomyces cerevisiae (strain ATCC 204508 / S288c) GN=CHS3 PE=1 SV=3	1.07613e+06	738083	960888	843187	443848	600842	484382	777484	905598	913013	1.05715e+06	934258	368933	633921	524519	659245
P15424	13	13	881.44	76621	ATP-dependent RNA helicase MSS116, mitochondrial OS=Saccharomyces cerevisiae (strain ATCC 204508 / S288c) GN=MSS116 PE=1 SV=1	1.46581e+06	1.44136e+06	2.19044e+06	1.93012e+06	2.30799e+06	2.98864e+06	2.99281e+06	2.82571e+06	1.23353e+06	1.78297e+06	2.40989e+06	2.13859e+06	1.91844e+06	3.15318e+06	3.2408e+06	2.39597e+06
P38143	9	8	575.73	18622	Glutathione peroxidase 2 OS=Saccharomyces cerevisiae (strain ATCC 204508 / S288c) GN=GPX2 PE=1 SV=1	6.12749e+06	5.39308e+06	6.75453e+06	5.97857e+06	4.23381e+06	5.18285e+06	4.8232e+06	6.0392e+06	5.15647e+06	6.67126e+06	7.43123e+06	6.62431e+06	3.51921e+06	5.46819e+06	5.22286e+06	5.12076e+06
P69771	2	2	84.58	23134	Vacuolar protein-sorting-associated protein 46 OS=Saccharomyces cerevisiae (strain ATCC 204508 / S288c) GN=DID2 PE=1 SV=1	946090	912663	1.04672e+06	953441	1.18345e+06	1.15018e+06	1.32294e+06	1.45824e+06	796163	1.12897e+06	1.15158e+06	1.05642e+06	983703	1.2135e+06	1.43256e+06	1.23647e+06
P40059	6	6	519.01	73232	Transcriptional regulatory protein DOT6 OS=Saccharomyces cerevisiae (strain ATCC 204508 / S288c) GN=DOT6 PE=1 SV=1	2.36107e+06	1.62364e+06	1.5242e+06	2.35715e+06	75086.3	714642	288991	1.17875e+06	1.98691e+06	2.00845e+06	1.6769e+06	2.61174e+06	62412.9	753986	312937	999490
P05748;P54780	10	10	711.59	24464	60S ribosomal protein L15-A OS=Saccharomyces cerevisiae (strain ATCC 204508 / S288c) GN=RPL15A PE=1 SV=3	2.08093e+08	2.50028e+08	2.73718e+08	2.65013e+08	1.79471e+08	2.09729e+08	1.94476e+08	2.09688e+08	1.75116e+08	3.09286e+08	3.01141e+08	2.93636e+08	1.49179e+08	2.21276e+08	2.10591e+08	1.77799e+08
P0C0W1	12	11	975.76	14674	40S ribosomal protein S22-A OS=Saccharomyces cerevisiae (strain ATCC 204508 / S288c) GN=RPS22A PE=1 SV=2	1.65616e+08	1.81852e+08	1.90427e+08	2.05118e+08	1.27976e+08	1.57835e+08	1.47424e+08	1.76008e+08	1.39371e+08	2.24952e+08	2.09505e+08	2.27273e+08	1.06375e+08	1.66524e+08	1.5964e+08	1.49241e+08
Q12522	4	4	340.39	26669	Eukaryotic translation initiation factor 6 OS=Saccharomyces cerevisiae (strain ATCC 204508 / S288c) GN=TIF6 PE=1 SV=1	9.28672e+06	1.19093e+07	1.36054e+07	1.17423e+07	7.2377e+06	8.12647e+06	8.64276e+06	9.49413e+06	7.81506e+06	1.47319e+07	1.49684e+07	1.30106e+07	6.01608e+06	8.57387e+06	9.35892e+06	8.05027e+06
P53337	5	5	373.75	35161	ER-derived vesicles protein ERV29 OS=Saccharomyces cerevisiae (strain ATCC 204508 / S288c) GN=ERV29 PE=1 SV=1	3.19741e+06	3.4323e+06	3.17324e+06	3.49041e+06	3.05683e+06	3.55985e+06	3.22863e+06	3.64732e+06	2.69072e+06	4.24577e+06	3.49115e+06	3.8674e+06	2.54088e+06	3.75584e+06	3.49616e+06	3.09264e+06
P35997	4	4	272.38	9159	40S ribosomal protein S27-A OS=Saccharomyces cerevisiae (strain ATCC 204508 / S288c) GN=RPS27A PE=1 SV=1	1.44635e+08	1.59158e+08	1.49112e+08	1.63038e+08	1.1909e+08	1.41086e+08	1.34931e+08	1.56211e+08	1.21714e+08	1.9688e+08	1.64051e+08	1.80647e+08	9.89896e+07	1.48854e+08	1.46112e+08	1.32455e+08
P53622	41	41	3112.59	136150	Coatomer subunit alpha OS=Saccharomyces cerevisiae (strain ATCC 204508 / S288c) GN=COP1 PE=1 SV=2	1.8084e+07	1.82795e+07	1.68844e+07	1.83698e+07	2.05191e+07	1.96263e+07	1.9193e+07	2.10312e+07	1.52182e+07	2.26118e+07	1.8576e+07	2.03539e+07	1.70558e+07	2.07068e+07	2.07834e+07	1.78328e+07
P38182	2	2	56.94	13675	Autophagy-related protein 8 OS=Saccharomyces cerevisiae (strain ATCC 204508 / S288c) GN=ATG8 PE=1 SV=1	46072.2	59006.9	42436.8	41677.4	71395	90866.4	220650	179450	38771.2	72991.8	46688.3	46178.9	59344.6	95869	238934	152159
P48570	24	5	1741.05	47526	Homocitrate synthase, cytosolic isozyme OS=Saccharomyces cerevisiae (strain ATCC 204508 / S288c) GN=LYS20 PE=1 SV=1	1.62846e+07	1.75728e+07	1.63119e+07	1.83535e+07	1.27597e+07	1.51231e+07	1.33463e+07	1.1835e+07	1.37039e+07	2.17376e+07	1.79461e+07	2.03358e+07	1.0606e+07	1.59557e+07	1.44522e+07	1.00352e+07
Q12122	24	5	1765.14	49020	Homocitrate synthase, mitochondrial OS=Saccharomyces cerevisiae (strain ATCC 204508 / S288c) GN=LYS21 PE=1 SV=1	1.66777e+07	1.79971e+07	1.67057e+07	1.87966e+07	1.30677e+07	1.54883e+07	1.36685e+07	1.21208e+07	1.40348e+07	2.22624e+07	1.83794e+07	2.08268e+07	1.08621e+07	1.6341e+07	1.48011e+07	1.02775e+07
P53929	7	7	306.48	30899	Uncharacterized protein YNL108C OS=Saccharomyces cerevisiae (strain ATCC 204508 / S288c) GN=YNL108C PE=1 SV=1	1.29913e+06	1.62277e+06	1.29433e+06	1.54154e+06	862860	1.03144e+06	1.01619e+06	1.11938e+06	1.09326e+06	2.00737e+06	1.42401e+06	1.70803e+06	717222	1.08822e+06	1.1004e+06	949142
P40053	19	19	1163.7	72654	Altered inheritance of mitochondria protein 9, mitochondrial OS=Saccharomyces cerevisiae (strain ATCC 204508 / S288c) GN=AIM9 PE=1 SV=1	4.87371e+06	4.44041e+06	4.72321e+06	4.48028e+06	5.0648e+06	4.80216e+06	5.25012e+06	6.20131e+06	4.10137e+06	5.49281e+06	5.1964e+06	4.96419e+06	4.20993e+06	5.06654e+06	5.68516e+06	5.25822e+06
P39535	4	4	160.68	98196	Low-affinity phosphate transporter PHO90 OS=Saccharomyces cerevisiae (strain ATCC 204508 / S288c) GN=PHO90 PE=1 SV=1	1.15657e+06	994610	1.1643e+06	875808	505817	572323	494543	875292	973286	1.23034e+06	1.28095e+06	970403	420442	603832	535522	742178
P32913	3	3	210.09	63222	Vacuolar protein sorting-associated protein 17 OS=Saccharomyces cerevisiae (strain ATCC 204508 / S288c) GN=VPS17 PE=1 SV=2	394680	388350	449125	416478	550678	710274	694318	680656	332135	480391	494120	461461	457732	749378	751851	577142
Q12220	15	15	830.02	107017	U3 small nucleolar RNA-associated protein 12 OS=Saccharomyces cerevisiae (strain ATCC 204508 / S288c) GN=DIP2 PE=1 SV=1	1.64845e+06	1.947e+06	2.03288e+06	2.1135e+06	1.18719e+06	1.36671e+06	1.37679e+06	1.48344e+06	1.38722e+06	2.40844e+06	2.23655e+06	2.34177e+06	986808	1.44195e+06	1.49088e+06	1.25784e+06
Q12044	4	4	254.67	29352	Regulator of calcineurin 2 OS=Saccharomyces cerevisiae (strain ATCC 204508 / S288c) GN=RCN2 PE=1 SV=1	1.14698e+06	1.0881e+06	1.15819e+06	1.15658e+06	2.59598e+06	2.02817e+06	1.73177e+06	2.09366e+06	965216	1.34599e+06	1.27423e+06	1.2815e+06	2.15782e+06	2.13983e+06	1.87527e+06	1.77526e+06
P12904	10	10	542.9	36606	5'-AMP-activated protein kinase subunit gamma OS=Saccharomyces cerevisiae (strain ATCC 204508 / S288c) GN=SNF4 PE=1 SV=1	1.95746e+06	2.17553e+06	1.77812e+06	2.09397e+06	2.56383e+06	2.40414e+06	2.31669e+06	2.50494e+06	1.64726e+06	2.69115e+06	1.95626e+06	2.32013e+06	2.1311e+06	2.5365e+06	2.50866e+06	2.12399e+06
Q12291	2	2	65.86	42414	25S rRNA (uridine(2843)-N(3))-methyltransferase OS=Saccharomyces cerevisiae (strain ATCC 204508 / S288c) GN=BMT6 PE=1 SV=1	119404	144070	114289	133929	79524.8	85439.3	69659.4	83848	100482	178215	125739	148394	66102.2	90143.1	75431.6	71096.4
P12686	6	6	323.22	39021	37S ribosomal protein MRP13, mitochondrial OS=Saccharomyces cerevisiae (strain ATCC 204508 / S288c) GN=MRP13 PE=1 SV=2	1.52426e+06	2.18321e+06	1.63789e+06	1.67107e+06	2.17358e+06	2.68551e+06	2.70593e+06	2.44307e+06	1.28271e+06	2.70064e+06	1.80199e+06	1.85156e+06	1.80672e+06	2.83336e+06	2.93015e+06	2.07153e+06
P40073	2	2	101.41	41214	High osmolarity signaling protein SHO1 OS=Saccharomyces cerevisiae (strain ATCC 204508 / S288c) GN=SHO1 PE=1 SV=1	1.18524e+06	1.30282e+06	1.09456e+06	1.04601e+06	729759	1.0725e+06	925145	1.01623e+06	997412	1.61159e+06	1.20422e+06	1.15899e+06	606587	1.13155e+06	1.00181e+06	861685
P04449	12	3	755.91	17603	60S ribosomal protein L24-A OS=Saccharomyces cerevisiae (strain ATCC 204508 / S288c) GN=RPL24A PE=1 SV=1	3.66548e+07	3.81756e+07	4.07199e+07	4.38879e+07	2.88875e+07	3.37505e+07	3.0985e+07	4.01044e+07	3.08461e+07	4.72235e+07	4.47994e+07	4.86281e+07	2.40118e+07	3.56086e+07	3.35524e+07	3.40053e+07
P17967	31	31	2450.12	58533	Protein disulfide-isomerase OS=Saccharomyces cerevisiae (strain ATCC 204508 / S288c) GN=PDI1 PE=1 SV=2	6.2558e+07	6.56765e+07	6.70306e+07	7.56863e+07	7.57346e+07	8.01669e+07	7.93214e+07	9.05562e+07	5.26444e+07	8.12421e+07	7.37461e+07	8.3861e+07	6.29517e+07	8.45804e+07	8.58941e+07	7.67845e+07
Q06078	15	15	787.96	105182	U3 small nucleolar RNA-associated protein 21 OS=Saccharomyces cerevisiae (strain ATCC 204508 / S288c) GN=UTP21 PE=1 SV=1	2.67697e+06	2.70679e+06	2.80245e+06	2.69745e+06	2.1451e+06	2.15137e+06	2.05823e+06	2.40833e+06	2.25275e+06	3.34831e+06	3.08321e+06	2.9888e+06	1.78304e+06	2.26982e+06	2.22878e+06	2.04207e+06
P38707	24	24	2295.63	62681	Asparagine--tRNA ligase, cytoplasmic OS=Saccharomyces cerevisiae (strain ATCC 204508 / S288c) GN=DED81 PE=1 SV=1	6.35281e+07	5.87111e+07	6.46233e+07	6.60309e+07	5.29439e+07	6.1364e+07	5.62625e+07	6.27663e+07	5.34608e+07	7.26259e+07	7.10976e+07	7.31628e+07	4.40078e+07	6.47424e+07	6.09245e+07	5.32208e+07
P53903	3	3	273.48	15044	Processing of GAS1 and ALP protein 2 OS=Saccharomyces cerevisiae (strain ATCC 204508 / S288c) GN=PGA2 PE=1 SV=3	2.81598e+06	3.04913e+06	2.96252e+06	2.69422e+06	2.50552e+06	2.59024e+06	2.49118e+06	2.72894e+06	2.36974e+06	3.77179e+06	3.25932e+06	2.98522e+06	2.08263e+06	2.73284e+06	2.6976e+06	2.31393e+06
Q12672	13	3	842.18	18320	60S ribosomal protein L21-B OS=Saccharomyces cerevisiae (strain ATCC 204508 / S288c) GN=RPL21B PE=1 SV=1	3.42588e+07	3.30397e+07	4.14149e+07	3.4968e+07	1.96656e+07	2.85683e+07	2.6153e+07	2.96686e+07	2.88298e+07	4.08702e+07	4.5564e+07	3.87449e+07	1.63463e+07	3.01411e+07	2.83201e+07	2.51566e+07
Q12114	11	9	952.95	73879	Chitin biosynthesis protein CHS5 OS=Saccharomyces cerevisiae (strain ATCC 204508 / S288c) GN=CHS5 PE=1 SV=1	6.52094e+06	6.70281e+06	6.08092e+06	6.5747e+06	8.1506e+06	7.12896e+06	7.52128e+06	8.09679e+06	5.48756e+06	8.29141e+06	6.69014e+06	7.28482e+06	6.7749e+06	7.52144e+06	8.14452e+06	6.86543e+06
P41543	8	8	649.66	54152	Dolichyl-diphosphooligosaccharide--protein glycosyltransferase subunit 1 OS=Saccharomyces cerevisiae (strain ATCC 204508 / S288c) GN=OST1 PE=1 SV=1	6.7456e+06	6.59354e+06	6.56927e+06	6.57771e+06	6.01683e+06	5.71194e+06	5.97351e+06	6.54208e+06	5.67663e+06	8.15624e+06	7.22741e+06	7.28815e+06	5.00128e+06	6.02641e+06	6.46849e+06	5.54716e+06
P38885	3	3	118.8	34320	Altered inheritance of mitochondria protein 46, mitochondrial OS=Saccharomyces cerevisiae (strain ATCC 204508 / S288c) GN=AIM46 PE=1 SV=1	854195	941008	673432	823042	897050	963040	995083	953172	718831	1.16403e+06	740900	911937	745641	1.01606e+06	1.07754e+06	808214
P53112	4	4	267.39	38396	Peroxisomal membrane protein PEX14 OS=Saccharomyces cerevisiae (strain ATCC 204508 / S288c) GN=PEX14 PE=1 SV=1	528783	562136	553814	459554	631341	746193	752621	994907	444987	695365	609299	509190	524780	787274	814985	843602
Q05881	5	5	292.74	41187	Uncharacterized protein YLR287C OS=Saccharomyces cerevisiae (strain ATCC 204508 / S288c) GN=YLR287C PE=1 SV=1	1.02852e+06	1.05759e+06	972271	1.21228e+06	563763	822477	817668	843151	865534	1.30824e+06	1.06968e+06	1.34322e+06	468608	867758	885422	714925
P0CX37	16	16	1258.52	27037	40S ribosomal protein S6-A OS=Saccharomyces cerevisiae (strain ATCC 204508 / S288c) GN=RPS6A PE=1 SV=1	3.31218e+08	3.58741e+08	3.64395e+08	4.14242e+08	2.54722e+08	3.2186e+08	2.95335e+08	3.57903e+08	2.7873e+08	4.43765e+08	4.00902e+08	4.58983e+08	2.11729e+08	3.3958e+08	3.19807e+08	3.03474e+08
P38765	4	4	311.08	32771	Uncharacterized isomerase YHI9 OS=Saccharomyces cerevisiae (strain ATCC 204508 / S288c) GN=YHI9 PE=1 SV=1	1.1531e+06	1.29751e+06	1.19816e+06	1.24115e+06	1.60555e+06	1.47021e+06	1.5287e+06	1.65764e+06	970365	1.60503e+06	1.31819e+06	1.37521e+06	1.33456e+06	1.55115e+06	1.65537e+06	1.40554e+06
P40037	6	6	632.02	14011	Protein HMF1 OS=Saccharomyces cerevisiae (strain ATCC 204508 / S288c) GN=HMF1 PE=1 SV=1	1.00108e+07	1.29621e+07	1.48301e+07	1.24647e+07	1.33022e+07	1.57281e+07	1.58083e+07	1.65001e+07	8.42441e+06	1.60341e+07	1.63158e+07	1.3811e+07	1.1057e+07	1.6594e+07	1.71182e+07	1.39907e+07
P53093	2	2	131.73	26207	Protein YIP4 OS=Saccharomyces cerevisiae (strain ATCC 204508 / S288c) GN=YIP4 PE=1 SV=2	602455	504316	540013	504624	852402	873265	587675	847352	506984	623841	594114	559127	708530	921342	636372	718487
P38903	4	4	175.89	85738	Serine/threonine-protein phosphatase 2A 56 kDa regulatory subunit delta isoform OS=Saccharomyces cerevisiae (strain ATCC 204508 / S288c) GN=RTS1 PE=1 SV=2	797724	707025	703881	836825	873731	933040	869544	1.06337e+06	671309	874594	774400	927209	726259	984408	941596	901656
P00360	28	16	2613.48	35842	Glyceraldehyde-3-phosphate dehydrogenase 1 OS=Saccharomyces cerevisiae (strain ATCC 204508 / S288c) GN=TDH1 PE=1 SV=3	9.45966e+07	9.87998e+07	1.14962e+08	9.14851e+07	8.17134e+07	8.30332e+07	8.04404e+07	7.18626e+07	7.96059e+07	1.22216e+08	1.2648e+08	1.01366e+08	6.79214e+07	8.76046e+07	8.71059e+07	6.09337e+07
P32589	42	33	3748.39	77604	Heat shock protein homolog SSE1 OS=Saccharomyces cerevisiae (strain ATCC 204508 / S288c) GN=SSE1 PE=1 SV=4	9.67494e+07	1.11596e+08	1.03029e+08	1.14343e+08	5.88562e+07	8.22978e+07	7.84522e+07	8.65602e+07	8.14176e+07	1.38045e+08	1.13351e+08	1.26693e+08	4.89222e+07	8.68286e+07	8.4953e+07	7.33961e+07
Q03430	4	4	210.31	41304	37S ribosomal protein RSM28, mitochondrial OS=Saccharomyces cerevisiae (strain ATCC 204508 / S288c) GN=RSM28 PE=1 SV=2	320640	117428	232129	936212	1.68746e+06	1.65984e+06	1.41527e+06	1.22407e+06	269828	145259	255385	1.03733e+06	1.40264e+06	1.75123e+06	1.53255e+06	1.03791e+06
P00937	11	11	754.84	53969	Multifunctional tryptophan biosynthesis protein OS=Saccharomyces cerevisiae (strain ATCC 204508 / S288c) GN=TRP3 PE=1 SV=2	6.54962e+06	6.43093e+06	6.46677e+06	7.46832e+06	6.51124e+06	7.18183e+06	6.47812e+06	7.75651e+06	5.5117e+06	7.95509e+06	7.11464e+06	8.27496e+06	5.41224e+06	7.57723e+06	7.01491e+06	6.5769e+06
P41819	11	10	502.34	36099	Dimethyladenosine transferase OS=Saccharomyces cerevisiae (strain ATCC 204508 / S288c) GN=DIM1 PE=1 SV=1	4.99184e+06	5.30141e+06	4.94216e+06	1.27791e+07	4.933e+06	4.56584e+06	3.6559e+06	3.00719e+06	4.20078e+06	6.55786e+06	5.43729e+06	1.41594e+07	4.10038e+06	4.81721e+06	3.95884e+06	2.54986e+06
P53088	2	2	131.58	40703	Cytoplasmic tRNA 2-thiolation protein 1 OS=Saccharomyces cerevisiae (strain ATCC 204508 / S288c) GN=NCS6 PE=1 SV=3	323928	257101	413746	298013	137964	190099	182800	181167	272595	318035	455197	330201	114677	200564	197947	153615
P16474	28	24	2174.15	74479	78 kDa glucose-regulated protein homolog OS=Saccharomyces cerevisiae (strain ATCC 204508 / S288c) GN=KAR2 PE=1 SV=1	4.0963e+07	4.59694e+07	4.43698e+07	4.82422e+07	3.40831e+07	4.17643e+07	4.16031e+07	4.73021e+07	3.44716e+07	5.68644e+07	4.8815e+07	5.34528e+07	2.83303e+07	4.40636e+07	4.50505e+07	4.01084e+07
P18544	4	4	283.52	46994	Acetylornithine aminotransferase, mitochondrial OS=Saccharomyces cerevisiae (strain ATCC 204508 / S288c) GN=ARG8 PE=1 SV=1	386371	950523	394566	777965	225810	185200	353383	158462	325143	1.1758e+06	434095	861992	187697	195396	382665	134363
P25303	3	3	188.38	41973	DnaJ-related protein SCJ1 OS=Saccharomyces cerevisiae (strain ATCC 204508 / S288c) GN=SCJ1 PE=1 SV=2	727659	760652	680889	900917	334363	465574	451214	503015	612347	940930	749104	998223	277928	491206	488603	426516
P0CX49	9	9	571.34	20608	60S ribosomal protein L18-A OS=Saccharomyces cerevisiae (strain ATCC 204508 / S288c) GN=RPL18A PE=1 SV=1	2.3253e+08	2.76078e+08	2.48044e+08	2.54766e+08	1.62437e+08	1.92923e+08	1.81766e+08	2.27689e+08	1.95681e+08	3.4151e+08	2.72894e+08	2.82283e+08	1.3502e+08	2.03544e+08	1.96827e+08	1.93063e+08
P53297	7	7	658.13	78789	PAB1-binding protein 1 OS=Saccharomyces cerevisiae (strain ATCC 204508 / S288c) GN=PBP1 PE=1 SV=1	5.53532e+06	5.01655e+06	4.82009e+06	5.3998e+06	5.9947e+06	5.77646e+06	6.06028e+06	5.69292e+06	4.65814e+06	6.2055e+06	5.303e+06	5.98303e+06	4.98288e+06	6.09448e+06	6.56245e+06	4.82714e+06
P05749	4	2	641.81	13685	60S ribosomal protein L22-A OS=Saccharomyces cerevisiae (strain ATCC 204508 / S288c) GN=RPL22A PE=1 SV=3	2.76364e+08	3.2493e+08	3.22222e+08	3.30204e+08	2.12324e+08	2.52126e+08	2.46799e+08	2.86198e+08	2.32569e+08	4.01939e+08	3.54503e+08	3.65869e+08	1.76487e+08	2.66006e+08	2.6725e+08	2.42673e+08
P48164	16	9	996.58	21621	40S ribosomal protein S7-B OS=Saccharomyces cerevisiae (strain ATCC 204508 / S288c) GN=RPS7B PE=1 SV=1	1.06232e+08	1.07705e+08	1.16283e+08	1.14279e+08	8.37079e+07	9.87279e+07	9.02807e+07	1.18486e+08	8.93972e+07	1.33231e+08	1.27933e+08	1.26622e+08	6.95793e+07	1.04163e+08	9.77616e+07	1.00467e+08
O94742	2	2	230.61	10380	26S proteasome complex subunit SEM1 OS=Saccharomyces cerevisiae (strain ATCC 204508 / S288c) GN=SEM1 PE=1 SV=1	6.90142e+06	8.39371e+06	8.97133e+06	8.94802e+06	1.23501e+07	1.07343e+07	1.19411e+07	1.28254e+07	5.80776e+06	1.03831e+07	9.87012e+06	9.91448e+06	1.02656e+07	1.13253e+07	1.29306e+07	1.08749e+07
P16120	26	25	2115.83	57553	Threonine synthase OS=Saccharomyces cerevisiae (strain ATCC 204508 / S288c) GN=THR4 PE=1 SV=1	3.83943e+07	3.55479e+07	3.60476e+07	3.35873e+07	3.82973e+07	4.12957e+07	3.90884e+07	4.28751e+07	3.231e+07	4.3973e+07	3.9659e+07	3.7215e+07	3.18333e+07	4.35692e+07	4.23274e+07	3.63547e+07
Q02100	3	2	112.41	70321	CRE-binding bZIP protein SKO1 OS=Saccharomyces cerevisiae (strain ATCC 204508 / S288c) GN=SKO1 PE=1 SV=1	40831	29174.5	10922.2	38302.9	123743	113638	77777.3	104303	34360.5	36089	12016.4	42440	102857	119895	84222.1	88440.7
P46676	8	7	486.61	118300	Suppressor of mar1-1 protein OS=Saccharomyces cerevisiae (strain ATCC 204508 / S288c) GN=SUM1 PE=1 SV=2	581718	754486	632559	879719	1.09043e+06	904018	1.00554e+06	999944	489533	933303	695933	974735	906383	953788	1.08886e+06	847873
Q04418	6	6	316.67	50389	RNA polymerase II-associated protein RBA50 OS=Saccharomyces cerevisiae (strain ATCC 204508 / S288c) GN=RBA50 PE=1 SV=2	624692	610981	660662	666341	288518	415135	363019	561880	525697	755787	726851	738312	239820	437990	393099	476430
P16862	41	39	3916.75	105179	ATP-dependent 6-phosphofructokinase subunit beta OS=Saccharomyces cerevisiae (strain ATCC 204508 / S288c) GN=PFK2 PE=1 SV=4	7.80645e+07	8.18668e+07	7.75006e+07	7.34657e+07	6.90267e+07	7.58011e+07	7.02267e+07	7.39873e+07	6.56936e+07	1.0127e+08	8.5265e+07	8.14006e+07	5.73761e+07	7.99743e+07	7.60458e+07	6.27353e+07
P53924	4	4	228.41	58175	E3 ubiquitin-protein ligase DMA2 OS=Saccharomyces cerevisiae (strain ATCC 204508 / S288c) GN=DMA2 PE=1 SV=1	730196	697636	520108	723570	846220	740940	769989	821520	614482	862980	572215	801722	703391	781732	833792	696584
P05453	33	33	2463.72	76788	Eukaryotic peptide chain release factor GTP-binding subunit OS=Saccharomyces cerevisiae (strain ATCC 204508 / S288c) GN=SUP35 PE=1 SV=1	2.42302e+07	2.78571e+07	2.80352e+07	2.97813e+07	2.09672e+07	2.30249e+07	2.1493e+07	2.5238e+07	2.03905e+07	3.44593e+07	3.08439e+07	3.29979e+07	1.74282e+07	2.42925e+07	2.3274e+07	2.13999e+07
P38221	4	4	168.15	52473	Phosphatidate cytidylyltransferase OS=Saccharomyces cerevisiae (strain ATCC 204508 / S288c) GN=CDS1 PE=1 SV=1	4.62833e+07	4.6464e+07	5.02634e+07	4.83636e+07	2.98136e+07	3.97979e+07	3.26554e+07	4.28998e+07	3.89488e+07	5.74762e+07	5.5299e+07	5.35873e+07	2.47815e+07	4.1989e+07	3.53613e+07	3.63756e+07
Q05050	21	19	1484.67	93402	Eisosome protein 1 OS=Saccharomyces cerevisiae (strain ATCC 204508 / S288c) GN=EIS1 PE=1 SV=1	2.14133e+06	2.60263e+06	3.31514e+06	2.67934e+06	3.41539e+06	3.62571e+06	3.30416e+06	3.28921e+06	1.80199e+06	3.21947e+06	3.64727e+06	2.96873e+06	2.83892e+06	3.82532e+06	3.57795e+06	2.78899e+06
P46995	3	3	147.13	85378	Histone-lysine N-methyltransferase, H3 lysine-36 specific OS=Saccharomyces cerevisiae (strain ATCC 204508 / S288c) GN=SET2 PE=1 SV=2	570332	477275	470065	552826	380033	434464	361730	453024	479952	590392	517158	612535	315889	458384	391704	384129
P10961	4	4	139.22	93226	Heat shock factor protein OS=Saccharomyces cerevisiae (strain ATCC 204508 / S288c) GN=HSF1 PE=1 SV=1	144513	257015	194176	218058	384393	302723	394754	274180	121612	317929	213630	241610	319513	319389	427464	232483
Q12265	13	12	839.27	53870	Ribose-phosphate pyrophosphokinase 5 OS=Saccharomyces cerevisiae (strain ATCC 204508 / S288c) GN=PRS5 PE=1 SV=1	7.76262e+06	8.89953e+06	8.67168e+06	9.24709e+06	4.63781e+06	6.67108e+06	6.13561e+06	7.10738e+06	6.53248e+06	1.10088e+07	9.54045e+06	1.02458e+07	3.85502e+06	7.03835e+06	6.64402e+06	6.02649e+06
P40422	2	2	200.51	7939	DNA-directed RNA polymerases I, II, and III subunit RPABC4 OS=Saccharomyces cerevisiae (strain ATCC 204508 / S288c) GN=RPC10 PE=1 SV=1	1.16336e+07	1.35341e+07	1.3139e+07	1.18219e+07	8.95067e+06	1.12722e+07	1.10526e+07	1.2355e+07	9.79002e+06	1.67418e+07	1.44553e+07	1.30988e+07	7.43993e+06	1.18928e+07	1.19685e+07	1.0476e+07
P33310	4	4	315.2	76188	ATP-dependent permease MDL1, mitochondrial OS=Saccharomyces cerevisiae (strain ATCC 204508 / S288c) GN=MDL1 PE=1 SV=2	604517	495146	394535	382609	703258	592841	737272	1.01355e+06	508719	612498	434061	423934	584559	625479	798364	859411
P38786	3	3	156.21	32432	Ribonuclease P/MRP protein subunit RPP1 OS=Saccharomyces cerevisiae (strain ATCC 204508 / S288c) GN=RPP1 PE=1 SV=1	180853	182036	234875	241261	141532	178595	159237	220237	152193	225179	258406	267319	117643	188427	172432	186743
P27809	15	15	1266.42	51810	Glycolipid 2-alpha-mannosyltransferase OS=Saccharomyces cerevisiae (strain ATCC 204508 / S288c) GN=KRE2 PE=1 SV=1	1.28982e+07	1.13249e+07	1.37895e+07	1.46075e+07	1.07793e+07	1.09667e+07	9.80056e+06	1.27119e+07	1.08542e+07	1.4009e+07	1.5171e+07	1.61852e+07	8.95992e+06	1.15704e+07	1.06127e+07	1.07787e+07
Q07527	12	12	653.25	166255	tRNA (guanosine(18)-2'-O)-methyltransferase OS=Saccharomyces cerevisiae (strain ATCC 204508 / S288c) GN=TRM3 PE=1 SV=1	1.01736e+06	944129	1.1135e+06	922569	728668	830165	698047	1.20964e+06	856137	1.16789e+06	1.22505e+06	1.02221e+06	605680	875870	755889	1.02567e+06
P38853	15	14	689.95	131299	Kelch repeat-containing protein 1 OS=Saccharomyces cerevisiae (strain ATCC 204508 / S288c) GN=KEL1 PE=1 SV=1	881359	918756	994640	944329	1.32518e+06	1.2062e+06	1.16413e+06	1.23484e+06	741690	1.13651e+06	1.09429e+06	1.04632e+06	1.10151e+06	1.2726e+06	1.26059e+06	1.04704e+06
P38247	3	2	104.03	18456	Protein SLM4 OS=Saccharomyces cerevisiae (strain ATCC 204508 / S288c) GN=SLM4 PE=1 SV=1	717958	1.00386e+06	830941	720152	1.35482e+06	1.12044e+06	1.36527e+06	852491	604183	1.24178e+06	914189	797934	1.12615e+06	1.18212e+06	1.4784e+06	722845
P53920	17	15	870.93	111667	Pro-apoptotic serine protease NMA111 OS=Saccharomyces cerevisiae (strain ATCC 204508 / S288c) GN=NMA111 PE=1 SV=1	3.53052e+06	3.85606e+06	3.89422e+06	3.75043e+06	2.65222e+06	3.44239e+06	3.23244e+06	3.66247e+06	2.97104e+06	4.76996e+06	4.28436e+06	4.15551e+06	2.20457e+06	3.63191e+06	3.50029e+06	3.10548e+06
Q03323	2	2	143.72	19491	COMPASS component SDC1 OS=Saccharomyces cerevisiae (strain ATCC 204508 / S288c) GN=SDC1 PE=1 SV=1	958951	1.05871e+06	1.0332e+06	1.02975e+06	1.22567e+06	1.20108e+06	1.37016e+06	1.48469e+06	806986	1.30963e+06	1.13671e+06	1.14097e+06	1.01879e+06	1.2672e+06	1.4837e+06	1.2589e+06
P0CX82	12	12	1099.11	21691	60S ribosomal protein L19-A OS=Saccharomyces cerevisiae (strain ATCC 204508 / S288c) GN=RPL19A PE=1 SV=1	2.2847e+08	2.83109e+08	2.7101e+08	2.76581e+08	1.7973e+08	2.20679e+08	2.07777e+08	2.43488e+08	1.92265e+08	3.50207e+08	2.98162e+08	3.06454e+08	1.49394e+08	2.32828e+08	2.24994e+08	2.06458e+08
P33753	3	3	167.1	73434	tRNA (uracil(54)-C(5))-methyltransferase OS=Saccharomyces cerevisiae (strain ATCC 204508 / S288c) GN=TRM2 PE=1 SV=2	536509	365743	621721	503716	440789	445717	385514	564094	451489	452426	684008	558121	366391	470256	417459	478307
P36009	3	2	128.25	83402	Probable ATP-dependent RNA helicase DHR2 OS=Saccharomyces cerevisiae (strain ATCC 204508 / S288c) GN=DHR2 PE=1 SV=1	372311	439701	412885	1.50048e+06	219552	204160	164516	317129	313311	543913	454249	1.66254e+06	182495	215400	178148	268900
P06101	14	13	769.7	58348	Hsp90 co-chaperone Cdc37 OS=Saccharomyces cerevisiae (strain ATCC 204508 / S288c) GN=CDC37 PE=1 SV=2	7.86961e+06	9.27048e+06	7.73251e+06	8.23565e+06	8.13863e+06	9.24577e+06	9.32144e+06	9.3991e+06	6.62252e+06	1.14676e+07	8.50719e+06	9.12516e+06	6.76495e+06	9.75478e+06	1.00938e+07	7.96969e+06
P30657	5	5	409.09	29425	Proteasome subunit beta type-7 OS=Saccharomyces cerevisiae (strain ATCC 204508 / S288c) GN=PRE4 PE=1 SV=1	1.02883e+07	1.11059e+07	1.15762e+07	1.28742e+07	1.35788e+07	1.33978e+07	1.36387e+07	1.28991e+07	8.65793e+06	1.3738e+07	1.2736e+07	1.42647e+07	1.12869e+07	1.41354e+07	1.47688e+07	1.09374e+07
Q03954	2	2	131.17	18955	DASH complex subunit SPC19 OS=Saccharomyces cerevisiae (strain ATCC 204508 / S288c) GN=SPC19 PE=1 SV=1	436422	448069	460389	483226	554834	658589	655016	822876	367262	554264	506513	535418	461186	694848	709293	697733
P38197	7	7	360.05	29333	UPF0001 protein YBL036C OS=Saccharomyces cerevisiae (strain ATCC 204508 / S288c) GN=YBL036C PE=1 SV=1	5.86076e+06	5.94892e+06	5.66146e+06	5.34556e+06	4.73079e+06	4.93523e+06	5.03044e+06	5.10563e+06	4.93201e+06	7.35884e+06	6.22866e+06	5.92293e+06	3.9323e+06	5.20694e+06	5.44727e+06	4.32917e+06
Q12446	3	3	135.62	67587	Proline-rich protein LAS17 OS=Saccharomyces cerevisiae (strain ATCC 204508 / S288c) GN=LAS17 PE=1 SV=1	620440	930734	721350	773174	1.03854e+06	953480	1.12976e+06	1.04045e+06	522119	1.15132e+06	793619	856683	863249	1.00597e+06	1.22338e+06	882218
P29539	3	2	113.81	218878	Telomere length regulator protein RIF1 OS=Saccharomyces cerevisiae (strain ATCC 204508 / S288c) GN=RIF1 PE=1 SV=3	94311.7	78377.5	120076	114636	62520.8	95173.9	68390.8	58446	79366.2	96953.3	132106	127017	51968.2	100414	74057.8	49557.5
P14120	10	10	1028.46	11408	60S ribosomal protein L30 OS=Saccharomyces cerevisiae (strain ATCC 204508 / S288c) GN=RPL30 PE=1 SV=3	4.13649e+08	4.25353e+08	4.38604e+08	4.49838e+08	3.10424e+08	3.71795e+08	3.38838e+08	4.61612e+08	3.48098e+08	5.26163e+08	4.82546e+08	4.98424e+08	2.58029e+08	3.92263e+08	3.66915e+08	3.9141e+08
Q12149	6	6	305.47	84158	Exosome complex exonuclease RRP6 OS=Saccharomyces cerevisiae (strain ATCC 204508 / S288c) GN=RRP6 PE=1 SV=1	1.47673e+06	1.74963e+06	1.62164e+06	1.58731e+06	744852	927619	893777	1.01476e+06	1.24271e+06	2.1643e+06	1.7841e+06	1.75875e+06	619132	978689	967838	860435
P28625	6	5	417.77	41782	Protein YIM1 OS=Saccharomyces cerevisiae (strain ATCC 204508 / S288c) GN=YIM1 PE=1 SV=2	7.17694e+06	7.89784e+06	6.64337e+06	6.85043e+06	9.02093e+06	7.34801e+06	7.44834e+06	7.59218e+06	6.03961e+06	9.76967e+06	7.30894e+06	7.59033e+06	7.49833e+06	7.75255e+06	8.06552e+06	6.43756e+06
P87108	5	5	507.57	10526	Mitochondrial import inner membrane translocase subunit TIM10 OS=Saccharomyces cerevisiae (strain ATCC 204508 / S288c) GN=TIM10 PE=1 SV=1	5.72838e+06	9.1425e+06	5.65148e+06	5.89629e+06	9.97133e+06	1.10663e+07	1.11493e+07	1.35765e+07	4.8206e+06	1.13093e+07	6.21768e+06	6.53314e+06	8.28832e+06	1.16755e+07	1.20731e+07	1.15118e+07
P43588	8	8	591.75	34433	Ubiquitin carboxyl-terminal hydrolase RPN11 OS=Saccharomyces cerevisiae (strain ATCC 204508 / S288c) GN=RPN11 PE=1 SV=1	5.35961e+06	5.60109e+06	5.59752e+06	5.93655e+06	6.29384e+06	6.21144e+06	6.58746e+06	6.79054e+06	4.51027e+06	6.92857e+06	6.15831e+06	6.57775e+06	5.23154e+06	6.55341e+06	7.13332e+06	5.75784e+06
Q01855	12	12	1195.09	15992	40S ribosomal protein S15 OS=Saccharomyces cerevisiae (strain ATCC 204508 / S288c) GN=RPS15 PE=1 SV=1	2.06671e+08	2.34668e+08	2.2775e+08	2.24892e+08	1.66625e+08	1.98328e+08	2.0219e+08	2.25243e+08	1.7392e+08	2.90286e+08	2.50567e+08	2.49183e+08	1.38501e+08	2.09246e+08	2.18944e+08	1.90988e+08
Q03016	5	4	170.56	141602	GLC7-interacting protein 3 OS=Saccharomyces cerevisiae (strain ATCC 204508 / S288c) GN=GIP3 PE=1 SV=1	266174	226351	309805	276364	210183	141498	105156	254915	223994	279997	340843	306213	174708	149289	113869	216147
Q12495	2	2	62.35	70452	Chromatin assembly factor 1 subunit p90 OS=Saccharomyces cerevisiae (strain ATCC 204508 / S288c) GN=RLF2 PE=1 SV=1	41823	56938.3	41735.4	48197	42804.8	76230.7	67093.2	53282.7	35195.3	70433	45916.7	53402.6	35580	80427.6	72652.7	45179.5
P36040	2	2	108.95	30948	Proteasome assembly chaperone 2 OS=Saccharomyces cerevisiae (strain ATCC 204508 / S288c) GN=ADD66 PE=1 SV=1	1.10459e+06	1.11916e+06	877789	884773	1.31763e+06	1.58399e+06	1.48126e+06	1.11261e+06	929546	1.3844e+06	965730	980336	1.09524e+06	1.6712e+06	1.604e+06	943404
P53973	6	4	250.8	80817	Histone deacetylase HDA1 OS=Saccharomyces cerevisiae (strain ATCC 204508 / S288c) GN=HDA1 PE=1 SV=1	491241	548344	573041	523954	707008	504587	597431	643235	413395	678304	630451	580545	587676	532367	646936	545412
P38116	5	4	305.4	20479	ADP-ribosylation factor-like protein 1 OS=Saccharomyces cerevisiae (strain ATCC 204508 / S288c) GN=ARL1 PE=1 SV=4	2.67611e+06	2.85978e+06	2.76678e+06	2.66257e+06	3.7593e+06	3.51434e+06	3.37569e+06	3.21283e+06	2.25203e+06	3.53757e+06	3.04397e+06	2.95015e+06	3.12479e+06	3.70782e+06	3.6554e+06	2.72422e+06
P53082	2	2	61.99	14264	Fe repressor of activation 2 OS=Saccharomyces cerevisiae (strain ATCC 204508 / S288c) GN=FRA2 PE=1 SV=1	659138	744755	668310	619686	782711	918001	885799	963574	554685	921265	735265	686617	650601	968541	959199	817034
Q06624	3	2	181.64	39363	DNA damage tolerance protein RHC31 OS=Saccharomyces cerevisiae (strain ATCC 204508 / S288c) GN=AOS1 PE=1 SV=1	686880	796400	590788	632688	887122	876966	1.01371e+06	1.03359e+06	578031	985150	649976	701024	737389	925247	1.09771e+06	876406
P19097	112	109	9886.62	207388	Fatty acid synthase subunit alpha OS=Saccharomyces cerevisiae (strain ATCC 204508 / S288c) GN=FAS2 PE=1 SV=2	1.19139e+08	1.07908e+08	1.02259e+08	1.00906e+08	1.11068e+08	1.33815e+08	1.29249e+08	1.48188e+08	1.00259e+08	1.33483e+08	1.12503e+08	1.11805e+08	9.2321e+07	1.41183e+08	1.39959e+08	1.25652e+08
P36100	3	3	149.78	54937	Transcription initiation factor IIE subunit alpha OS=Saccharomyces cerevisiae (strain ATCC 204508 / S288c) GN=TFA1 PE=1 SV=1	648317	550594	671251	684360	677995	692686	570190	774740	545578	681087	738501	758276	563559	730821	617437	656918
P25342	7	7	376.92	37059	Cell division control protein 10 OS=Saccharomyces cerevisiae (strain ATCC 204508 / S288c) GN=CDC10 PE=1 SV=1	5.0185e+06	4.99383e+06	5.36879e+06	5.78341e+06	5.8059e+06	5.61221e+06	5.44737e+06	6.4217e+06	4.22322e+06	6.17739e+06	5.90666e+06	6.40806e+06	4.82595e+06	5.92119e+06	5.89875e+06	5.44509e+06
Q07458	2	2	111.09	33905	Transcriptional regulatory protein RXT3 OS=Saccharomyces cerevisiae (strain ATCC 204508 / S288c) GN=RXT3 PE=1 SV=1	85003.2	80422.3	94204.7	64144.7	127726	168510	109327	99876.8	71532.8	99482.8	103643	71072.8	106168	177787	118386	84687.6
P29496	5	5	336.77	86870	Minichromosome maintenance protein 5 OS=Saccharomyces cerevisiae (strain ATCC 204508 / S288c) GN=MCM5 PE=1 SV=1	1.76296e+06	1.82431e+06	1.6666e+06	1.54536e+06	1.49232e+06	1.55511e+06	1.72824e+06	1.65506e+06	1.48358e+06	2.25668e+06	1.83357e+06	1.71227e+06	1.24044e+06	1.64072e+06	1.87145e+06	1.40336e+06
Q99297	3	3	179.91	34270	Mitochondrial 2-oxodicarboxylate carrier 2 OS=Saccharomyces cerevisiae (strain ATCC 204508 / S288c) GN=ODC2 PE=1 SV=1	487203	620984	783009	739972	759815	716277	812898	1.5539e+06	409996	768160	861455	819895	631570	755711	880257	1.31759e+06
P0CX39	10	10	1070.14	22590	40S ribosomal protein S8-A OS=Saccharomyces cerevisiae (strain ATCC 204508 / S288c) GN=RPS8A PE=1 SV=1	2.84188e+08	3.0393e+08	3.15538e+08	3.28998e+08	2.25787e+08	2.66513e+08	2.36881e+08	2.84316e+08	2.39153e+08	3.75963e+08	3.4715e+08	3.64532e+08	1.87678e+08	2.81186e+08	2.56509e+08	2.41077e+08
P38331	3	2	117.82	27844	HD domain-containing protein YBR242W OS=Saccharomyces cerevisiae (strain ATCC 204508 / S288c) GN=YBR242W PE=1 SV=1	457496	258871	304559	267984	72457.3	180781	105410	230174	384997	320225	335072	296928	60227.6	190734	114145	195170
Q03973	5	5	302.78	27527	High mobility group protein 1 OS=Saccharomyces cerevisiae (strain ATCC 204508 / S288c) GN=HMO1 PE=1 SV=1	7.59951e+06	9.24077e+06	9.62031e+06	9.17785e+06	1.02255e+07	1.25438e+07	1.14441e+07	1.18173e+07	6.39521e+06	1.14309e+07	1.05841e+07	1.01691e+07	8.49961e+06	1.32344e+07	1.23923e+07	1.00202e+07
P25270	3	3	200.1	46586	rRNA methyltransferase 1, mitochondrial OS=Saccharomyces cerevisiae (strain ATCC 204508 / S288c) GN=MRM1 PE=1 SV=2	770628	273197	547210	363918	737715	1.03127e+06	932450	758566	648507	337946	602033	403224	613200	1.08804e+06	1.00972e+06	643204
P38753	8	6	402.39	51243	Class E vacuolar protein-sorting machinery protein HSE1 OS=Saccharomyces cerevisiae (strain ATCC 204508 / S288c) GN=HSE1 PE=1 SV=1	880401	784343	770686	905157	1.00692e+06	1.06759e+06	915711	1.2057e+06	740884	970235	847897	1.00292e+06	836965	1.12637e+06	991589	1.02234e+06
P06787	6	6	607.83	16125	Calmodulin OS=Saccharomyces cerevisiae (strain ATCC 204508 / S288c) GN=CMD1 PE=1 SV=1	1.4368e+07	1.70913e+07	1.74789e+07	1.71863e+07	1.88373e+07	2.1997e+07	2.22913e+07	2.33267e+07	1.20911e+07	2.1142e+07	1.923e+07	1.90426e+07	1.56578e+07	2.32081e+07	2.41384e+07	1.97792e+07
P15625	23	22	1772.92	57532	Phenylalanine--tRNA ligase alpha subunit OS=Saccharomyces cerevisiae (strain ATCC 204508 / S288c) GN=FRS2 PE=1 SV=3	2.22858e+07	2.94387e+07	2.58932e+07	2.72378e+07	1.52631e+07	1.83947e+07	1.72663e+07	1.9291e+07	1.87542e+07	3.64158e+07	2.84873e+07	3.01797e+07	1.26869e+07	1.94074e+07	1.8697e+07	1.63572e+07
P36076	4	4	137.24	65312	Coenzyme A biosynthesis protein 3 OS=Saccharomyces cerevisiae (strain ATCC 204508 / S288c) GN=CAB3 PE=1 SV=1	285552	329073	333941	319005	356853	364511	345466	365440	240301	407065	367397	353460	296622	384579	374092	309864
Q03705	3	3	192.38	20877	EKC/KEOPS complex subunit CGI121 OS=Saccharomyces cerevisiae (strain ATCC 204508 / S288c) GN=CGI121 PE=1 SV=1	1.00124e+06	1.16666e+06	966203	1.20556e+06	1.32776e+06	1.27996e+06	1.55389e+06	1.41678e+06	842570	1.44316e+06	1.063e+06	1.33577e+06	1.10366e+06	1.35042e+06	1.68265e+06	1.20131e+06
P25087	19	19	1286.04	43631	Sterol 24-C-methyltransferase OS=Saccharomyces cerevisiae (strain ATCC 204508 / S288c) GN=ERG6 PE=1 SV=4	2.04701e+07	2.16745e+07	2.51308e+07	2.02212e+07	2.41778e+07	2.63984e+07	2.82802e+07	2.9274e+07	1.72262e+07	2.68115e+07	2.76485e+07	2.24052e+07	2.00969e+07	2.78518e+07	3.06236e+07	2.4822e+07
P32478;P46999	8	6	653.76	41263	Cell wall mannoprotein HSP150 OS=Saccharomyces cerevisiae (strain ATCC 204508 / S288c) GN=HSP150 PE=1 SV=2	1.70709e+07	1.52752e+07	1.41205e+07	1.2669e+07	2.00686e+07	1.59194e+07	1.78229e+07	1.7378e+07	1.43656e+07	1.88955e+07	1.55352e+07	1.40374e+07	1.66813e+07	1.67958e+07	1.92998e+07	1.47352e+07
P40563	11	11	705.28	74832	Altered inheritance of mitochondria protein 21 OS=Saccharomyces cerevisiae (strain ATCC 204508 / S288c) GN=AIM21 PE=1 SV=1	967765	1.20984e+06	1.08367e+06	1.36726e+06	1.42869e+06	1.55152e+06	1.51556e+06	1.50009e+06	814404	1.49658e+06	1.19224e+06	1.51493e+06	1.18754e+06	1.63693e+06	1.64114e+06	1.27196e+06
P17442	13	12	606.26	134687	Phosphate system positive regulatory protein PHO81 OS=Saccharomyces cerevisiae (strain ATCC 204508 / S288c) GN=PHO81 PE=1 SV=2	1.78398e+06	1.86687e+06	1.6587e+06	1.57136e+06	1.77275e+06	1.80153e+06	2.00255e+06	2.90188e+06	1.50127e+06	2.30933e+06	1.82488e+06	1.74108e+06	1.47354e+06	1.90072e+06	2.16848e+06	2.46056e+06
P39993	11	9	677.3	166534	ARF guanine-nucleotide exchange factor 2 OS=Saccharomyces cerevisiae (strain ATCC 204508 / S288c) GN=GEA2 PE=1 SV=1	1.3337e+06	1.39612e+06	1.24449e+06	1.39896e+06	1.20852e+06	1.1824e+06	1.18488e+06	1.33395e+06	1.12235e+06	1.727e+06	1.36917e+06	1.55006e+06	1.00454e+06	1.24749e+06	1.28306e+06	1.13108e+06
Q03707	3	3	177.91	96066	Inner nuclear membrane protein SRC1 OS=Saccharomyces cerevisiae (strain ATCC 204508 / S288c) GN=SRC1 PE=1 SV=2	780523	728115	808406	800636	1.14783e+06	970369	901101	1.0789e+06	656834	900682	889396	887111	954097	1.02379e+06	975769	914820
Q00416	4	4	153.84	254106	Helicase SEN1 OS=Saccharomyces cerevisiae (strain ATCC 204508 / S288c) GN=SEN1 PE=1 SV=2	237311	304816	145005	195253	93523.2	110847	135762	177981	199705	377058	159532	216342	77737.9	116949	147012	150914
P39079	22	21	1983.03	60171	T-complex protein 1 subunit zeta OS=Saccharomyces cerevisiae (strain ATCC 204508 / S288c) GN=CCT6 PE=1 SV=1	1.27949e+07	1.78611e+07	1.27154e+07	1.4406e+07	8.87425e+06	9.50458e+06	9.57523e+06	1.05069e+07	1.07673e+07	2.20942e+07	1.39893e+07	1.5962e+07	7.37641e+06	1.00278e+07	1.03687e+07	8.909e+06
Q05521	3	3	183.4	33663	Diacylglycerol pyrophosphate phosphatase 1 OS=Saccharomyces cerevisiae (strain ATCC 204508 / S288c) GN=DPP1 PE=1 SV=1	1.35204e+06	1.59543e+06	1.44674e+06	1.49491e+06	1.65319e+06	1.48784e+06	1.64056e+06	1.65395e+06	1.13778e+06	1.97355e+06	1.59168e+06	1.65637e+06	1.37416e+06	1.56976e+06	1.7765e+06	1.40241e+06
[truncated: 1,268 more rows]
