# Supplementary material for: Proteomic analysis of dietary restriction in yeast reveals a role for Hsp26 in replicative lifespan extension
Source: Biochem J. 2021 Dec 16;478(24):4153–67. doi: 10.1042/BCJ20210432 (PMC8786290; doi:10.1042/BCJ20210432)
Supplement: Supplementary Table S2 [file BCJ-478-4153-s3.pdf]

## Sheet: Fold changes and descriptions
Supplementary Table 2, Campion et al: protein expression changes comparing 2% to 0.05% glucose
				Mean Normalized abundance from 4 biological replicates
Accession	Gene	Anova (p)	q Value	2% glucose	0.05% glucose	Fold Change	Description
Q08906	FIT2 (Q08906)	0.0241033	0.00877332	3917.92	393948	100.55	Facilitator of iron transport 2 OS=Saccharomyces cerevisiae (strain ATCC 204508 / S288c) GN=FIT2 PE=2 SV=1
P40188	RGI2 (P40188)	2.74928e-08	1.43695e-07	23332.6	2.10988e+06	90.426	Respiratory growth induced protein 2 OS=Saccharomyces cerevisiae (strain ATCC 204508 / S288c) GN=RGI2 PE=1 SV=1
P38361	PHO89 (P38361)	4.76544e-07	1.09183e-06	25417.8	1.99185e+06	78.3644	Phosphate permease PHO89 OS=Saccharomyces cerevisiae (strain ATCC 204508 / S288c) GN=PHO89 PE=1 SV=1
Q06625	GDB1 (Q06625)	5.01292e-07	1.1179e-06	41976.4	3.05711e+06	72.8293	Glycogen debranching enzyme OS=Saccharomyces cerevisiae (strain ATCC 204508 / S288c) GN=GDB1 PE=1 SV=1
P23493	MBR1 (P23493)	5.24992e-08	2.37314e-07	4430.92	193671	43.709	Mitochondrial biogenesis regulation protein 1 OS=Saccharomyces cerevisiae (strain ATCC 204508 / S288c) GN=MBR1 PE=1 SV=2
Q04438	SPG4 (Q04438)	0.00647801	0.00281603	2529.41	85147	33.6628	Stationary phase protein 4 OS=Saccharomyces cerevisiae (strain ATCC 204508 / S288c) GN=SPG4 PE=1 SV=1
P36035	JEN1 (P36035)	2.07248e-07	5.95808e-07	99674.9	2.5491e+06	25.5741	Carboxylic acid transporter protein homolog OS=Saccharomyces cerevisiae (strain ATCC 204508 / S288c) GN=JEN1 PE=1 SV=1
P53130	GPG1 (P53130)	1.00166e-07	3.60282e-07	9830.87	216111	21.9829	Heterotrimeric G protein gamma subunit GPG1 OS=Saccharomyces cerevisiae (strain ATCC 204508 / S288c) GN=GPG1 PE=1 SV=1
P38824	COX23 (P38824)	2.31985e-10	6.46668e-09	49888.5	1.07975e+06	21.6433	Cytochrome c oxidase-assembly factor COX23, mitochondrial OS=Saccharomyces cerevisiae (strain ATCC 204508 / S288c) GN=COX23 PE=1 SV=1
P39004	HXT7 (P39004)	2.66118e-10	6.84754e-09	1.96182e+07	4.04912e+08	20.6395	High-affinity hexose transporter HXT6 OS=Saccharomyces cerevisiae (strain ATCC 204508 / S288c) GN=HXT7 PE=1 SV=1
Q06177	TMA10 (Q06177)	2.25709e-05	2.3594e-05	242822	4.89022e+06	20.1391	Translation machinery-associated protein 10 OS=Saccharomyces cerevisiae (strain ATCC 204508 / S288c) GN=TMA10 PE=1 SV=3
P04806	HXK1 (P04806)	1.86591e-11	1.32468e-09	3.61912e+07	7.22684e+08	19.9685	Hexokinase-1 OS=Saccharomyces cerevisiae (strain ATCC 204508 / S288c) GN=HXK1 PE=1 SV=2
Q12428	PDH1 (Q12428)	8.40655e-08	3.21376e-07	57559.5	1.07836e+06	18.7346	Probable 2-methylcitrate dehydratase OS=Saccharomyces cerevisiae (strain ATCC 204508 / S288c) GN=PDH1 PE=1 SV=1
P39003	HXT6 (P39003)	1.91328e-10	5.9296e-09	4.63824e+06	7.41307e+07	15.9825	High-affinity hexose transporter HXT6 OS=Saccharomyces cerevisiae (strain ATCC 204508 / S288c) GN=HXT6 PE=1 SV=2
P41939	IDP2 (P41939)	1.91992e-05	2.07504e-05	248177	3.74662e+06	15.0965	Isocitrate dehydrogenase [NADP] cytoplasmic OS=Saccharomyces cerevisiae (strain ATCC 204508 / S288c) GN=IDP2 PE=1 SV=2
Q12333	FRE7 (Q12333)	5.16402e-06	6.85891e-06	157503	2.19576e+06	13.9411	Ferric/cupric reductase transmembrane component 7 OS=Saccharomyces cerevisiae (strain ATCC 204508 / S288c) GN=FRE7 PE=1 SV=2
P00724	SUC2 (P00724)	5.10703e-15	1.70833e-12	3.31552e+06	4.27414e+07	12.8913	Invertase 2 OS=Saccharomyces cerevisiae (strain ATCC 204508 / S288c) GN=SUC2 PE=1 SV=1
P22943	HSP12 (P22943)	7.81741e-07	1.61917e-06	2.21606e+06	2.52286e+07	11.3844	12 kDa heat shock protein OS=Saccharomyces cerevisiae (strain ATCC 204508 / S288c) GN=HSP12 PE=1 SV=1
P10963	PCK1 (P10963)	3.89438e-05	3.69621e-05	926163	1.03822e+07	11.2099	Phosphoenolpyruvate carboxykinase [ATP] OS=Saccharomyces cerevisiae (strain ATCC 204508 / S288c) GN=PCK1 PE=1 SV=2
Q12497	FMP16 (Q12497)	1.00643e-05	1.1896e-05	136990	1.52979e+06	11.1672	Protein FMP16, mitochondrial OS=Saccharomyces cerevisiae (strain ATCC 204508 / S288c) GN=FMP16 PE=1 SV=1
P37298	SDH4 (P37298)	5.68082e-08	2.53369e-07	877929	9.69549e+06	11.0436	Succinate dehydrogenase [ubiquinone] cytochrome b small subunit, mitochondrial OS=Saccharomyces cerevisiae (strain ATCC 204508 / S288c) GN=SDH4 PE=1 SV=1
P39518	FAA2 (P39518)	7.28654e-08	2.86752e-07	42209.1	453668	10.7481	Long-chain-fatty-acid--CoA ligase 2 OS=Saccharomyces cerevisiae (strain ATCC 204508 / S288c) GN=FAA2 PE=1 SV=1
P43598	IGD1 (P43598)	1.2133e-07	4.09954e-07	61101.8	624437	10.2196	Inhibitor of glycogen debranching 1 OS=Saccharomyces cerevisiae (strain ATCC 204508 / S288c) GN=IGD1 PE=1 SV=1
P39677	MEF2 (P39677)	7.99893e-10	1.40826e-08	74757.3	755490	10.1059	Ribosome-releasing factor 2, mitochondrial OS=Saccharomyces cerevisiae (strain ATCC 204508 / S288c) GN=MEF2 PE=1 SV=1
Q96VH4	HBN1 (Q96VH4)	3.61932e-07	9.00135e-07	373435	3.20717e+06	8.58828	Putative nitroreductase HBN1 OS=Saccharomyces cerevisiae (strain ATCC 204508 / S288c) GN=HBN1 PE=1 SV=1
P43545	SNZ3 (P43545)	2.42904e-06	3.86918e-06	13136.8	111038	8.45247	Probable pyridoxal 5'-phosphate synthase subunit SNZ3 OS=Saccharomyces cerevisiae (strain ATCC 204508 / S288c) GN=SNZ3 PE=2 SV=1
P00890	CIT1 (P00890)	9.01435e-09	6.41564e-08	6.65788e+06	5.5524e+07	8.33959	Citrate synthase, mitochondrial OS=Saccharomyces cerevisiae (strain ATCC 204508 / S288c) GN=CIT1 PE=1 SV=2
P38345	FMP21 (P38345)	1.27946e-07	4.23189e-07	327170	2.69505e+06	8.23744	Succinate dehydrogenase assembly factor 4, mitochondrial OS=Saccharomyces cerevisiae (strain ATCC 204508 / S288c) GN=SDH8 PE=1 SV=2
P38783	FYV4 (P38783)	0.0544131	0.0175436	36026.6	291179	8.08233	Protein FYV4, mitochondrial OS=Saccharomyces cerevisiae (strain ATCC 204508 / S288c) GN=FYV4 PE=1 SV=1
P43567	AGX1 (P43567)	1.85764e-05	2.02738e-05	228842	1.82196e+06	7.96166	Alanine--glyoxylate aminotransferase 1 OS=Saccharomyces cerevisiae (strain ATCC 204508 / S288c) GN=AGX1 PE=1 SV=1
P08525	QCR8 (P08525)	6.39632e-06	8.13538e-06	273440	2.13824e+06	7.81978	Cytochrome b-c1 complex subunit 8 OS=Saccharomyces cerevisiae (strain ATCC 204508 / S288c) GN=QCR8 PE=1 SV=2
Q00711	SDH1 (Q00711)	2.96307e-06	4.50529e-06	3.14196e+06	2.4441e+07	7.77891	Succinate dehydrogenase [ubiquinone] flavoprotein subunit, mitochondrial OS=Saccharomyces cerevisiae (strain ATCC 204508 / S288c) GN=SDH1 PE=1 SV=1
Q02207	FOX2 (Q02207)	2.55695e-06	4.0345e-06	136745	1.05473e+06	7.71314	Peroxisomal hydratase-dehydrogenase-epimerase OS=Saccharomyces cerevisiae (strain ATCC 204508 / S288c) GN=FOX2 PE=1 SV=1
P00635	PHO5 (P00635)	1.55929e-06	2.77354e-06	340122	2.59578e+06	7.63192	Repressible acid phosphatase OS=Saccharomyces cerevisiae (strain ATCC 204508 / S288c) GN=PHO5 PE=1 SV=2
P38695	HXT5 (P38695)	0.0026418	0.001316	107599	790793	7.34947	Probable glucose transporter HXT5 OS=Saccharomyces cerevisiae (strain ATCC 204508 / S288c) GN=HXT5 PE=1 SV=1
P01097	INH1 (P01097)	4.54379e-11	2.74198e-09	424420	3.11834e+06	7.34728	ATPase inhibitor, mitochondrial OS=Saccharomyces cerevisiae (strain ATCC 204508 / S288c) GN=INH1 PE=1 SV=2
P16547	OM45 (P16547)	1.24078e-06	2.3252e-06	1.11531e+06	8.13973e+06	7.29818	Mitochondrial outer membrane protein OM45 OS=Saccharomyces cerevisiae (strain ATCC 204508 / S288c) GN=OM45 PE=1 SV=2
P0CW40		2.64745e-07	7.28879e-07	78574.5	566109	7.20474	Oligo-1,6-glucosidase IMA3 OS=Saccharomyces cerevisiae (strain ATCC 204508 / S288c) GN=IMA3 PE=1 SV=1
P07143	CYT1 (P07143)	5.55242e-09	4.76235e-08	2.65581e+06	1.90503e+07	7.17307	Cytochrome c1, heme protein, mitochondrial OS=Saccharomyces cerevisiae (strain ATCC 204508 / S288c) GN=CYT1 PE=1 SV=1
P00127	QCR6 (P00127)	3.70877e-09	3.7033e-08	1.29478e+06	8.89968e+06	6.87348	Cytochrome b-c1 complex subunit 6 OS=Saccharomyces cerevisiae (strain ATCC 204508 / S288c) GN=QCR6 PE=1 SV=2
P34228	SEF1 (P34228)	4.34106e-08	2.11987e-07	59414.3	400877	6.74714	Putative transcription factor SEF1 OS=Saccharomyces cerevisiae (strain ATCC 204508 / S288c) GN=SEF1 PE=1 SV=4
P32340	NDI1 (P32340)	8.14761e-09	6.01706e-08	2.23346e+06	1.46664e+07	6.56666	Rotenone-insensitive NADH-ubiquinone oxidoreductase, mitochondrial OS=Saccharomyces cerevisiae (strain ATCC 204508 / S288c) GN=NDI1 PE=1 SV=1
Q12498	PRM4 (Q12498)	1.25186e-05	1.42919e-05	15216.4	99589.7	6.5449	Pheromone-regulated membrane protein 4 OS=Saccharomyces cerevisiae (strain ATCC 204508 / S288c) GN=PRM4 PE=1 SV=1
P07255	COX9 (P07255)	1.36476e-07	4.38451e-07	1.10055e+06	7.15085e+06	6.49749	Cytochrome c oxidase subunit 7A OS=Saccharomyces cerevisiae (strain ATCC 204508 / S288c) GN=COX9 PE=1 SV=2
P53212	YGR021W (P53212)	1.42957e-06	2.60193e-06	171235	1.11046e+06	6.485	Probable transcriptional regulatory protein HAH1 OS=Saccharomyces cerevisiae (strain ATCC 204508 / S288c) GN=YGR021W PE=1 SV=1
P38958	PET100 (P38958)	1.23803e-07	4.14129e-07	88802.6	575646	6.48231	Protein PET100, mitochondrial OS=Saccharomyces cerevisiae (strain ATCC 204508 / S288c) GN=PET100 PE=1 SV=1
P38690	YHR033W (P38690)	7.69485e-05	6.59992e-05	16139.4	104558	6.47843	Uncharacterized protein YHR033W OS=Saccharomyces cerevisiae (strain ATCC 204508 / S288c) GN=YHR033W PE=1 SV=1
P32775	GLC3 (P32775)	5.268e-07	1.167e-06	1.23235e+06	7.80096e+06	6.33013	1,4-alpha-glucan-branching enzyme OS=Saccharomyces cerevisiae (strain ATCC 204508 / S288c) GN=GLC3 PE=1 SV=2
P17709	GLK1 (P17709)	1.10202e-09	1.8234e-08	1.44628e+07	9.02278e+07	6.2386	Glucokinase-1 OS=Saccharomyces cerevisiae (strain ATCC 204508 / S288c) GN=GLK1 PE=1 SV=1
Q01574	ACS1 (Q01574)	1.113e-06	2.16457e-06	661097	4.08802e+06	6.1837	Acetyl-coenzyme A synthetase 1 OS=Saccharomyces cerevisiae (strain ATCC 204508 / S288c) GN=ACS1 PE=1 SV=2
P46367	ALD4 (P46367)	5.76691e-10	1.16439e-08	2.80071e+07	1.70925e+08	6.10291	Potassium-activated aldehyde dehydrogenase, mitochondrial OS=Saccharomyces cerevisiae (strain ATCC 204508 / S288c) GN=ALD4 PE=1 SV=2
Q99296	YLR149C (Q99296)	0.00132898	0.00073662	3944.69	23846.8	6.04529	Uncharacterized protein YLR149C OS=Saccharomyces cerevisiae (strain ATCC 204508 / S288c) GN=YLR149C PE=1 SV=1
P39113	CAT8 (P39113)	3.59699e-06	5.24275e-06	57504.5	345028	6.00002	Regulatory protein CAT8 OS=Saccharomyces cerevisiae (strain ATCC 204508 / S288c) GN=CAT8 PE=1 SV=2
P37299	QCR10 (P37299)	2.36742e-08	1.31986e-07	510557	3.05053e+06	5.9749	Cytochrome b-c1 complex subunit 10 OS=Saccharomyces cerevisiae (strain ATCC 204508 / S288c) GN=QCR10 PE=1 SV=2
Q12443	RTN2 (Q12443)	1.00451e-05	1.18943e-05	269175	1.60349e+06	5.95705	Reticulon-like protein 2 OS=Saccharomyces cerevisiae (strain ATCC 204508 / S288c) GN=RTN2 PE=1 SV=1
P38158	MAL32 (P38158)	3.07064e-06	4.61638e-06	451163	2.61959e+06	5.80631	Alpha-glucosidase MAL32 OS=Saccharomyces cerevisiae (strain ATCC 204508 / S288c) GN=MAL32 PE=1 SV=1
P00175	CYB2 (P00175)	2.34244e-05	2.43342e-05	758426	4.3237e+06	5.70089	Cytochrome b2, mitochondrial OS=Saccharomyces cerevisiae (strain ATCC 204508 / S288c) GN=CYB2 PE=1 SV=1
P36156	ECM4 (P36156)	3.8254e-07	9.34027e-07	120000	666500	5.55417	Glutathione S-transferase omega-like 2 OS=Saccharomyces cerevisiae (strain ATCC 204508 / S288c) GN=ECM4 PE=1 SV=1
P00044	CYC1 (P00044)	2.56376e-09	2.95722e-08	1.15224e+06	6.35811e+06	5.51805	Cytochrome c iso-1 OS=Saccharomyces cerevisiae (strain ATCC 204508 / S288c) GN=CYC1 PE=1 SV=2
P06182	CYC3 (P06182)	0.000148474	0.000113133	106494	586129	5.50384	Cytochrome c heme lyase OS=Saccharomyces cerevisiae (strain ATCC 204508 / S288c) GN=CYC3 PE=1 SV=1
P07257	QCR2 (P07257)	7.67527e-10	1.38779e-08	8.81539e+06	4.79036e+07	5.43408	Cytochrome b-c1 complex subunit 2, mitochondrial OS=Saccharomyces cerevisiae (strain ATCC 204508 / S288c) GN=QCR2 PE=1 SV=1
P17505	MDH1 (P17505)	9.44599e-11	4.43283e-09	1.71024e+07	9.25849e+07	5.41358	Malate dehydrogenase, mitochondrial OS=Saccharomyces cerevisiae (strain ATCC 204508 / S288c) GN=MDH1 PE=1 SV=2
Q12513	TMA17 (Q12513)	1.16535e-06	2.21945e-06	1.35749e+06	7.27402e+06	5.35843	Translation machinery-associated protein 17 OS=Saccharomyces cerevisiae (strain ATCC 204508 / S288c) GN=TMA17 PE=1 SV=1
P00128	QCR7 (P00128)	9.71721e-07	1.9348e-06	1.41758e+06	7.51695e+06	5.30267	Cytochrome b-c1 complex subunit 7 OS=Saccharomyces cerevisiae (strain ATCC 204508 / S288c) GN=QCR7 PE=1 SV=2
P40433	PFK26 (P40433)	2.56851e-05	2.62746e-05	65132.8	343980	5.28121	6-phosphofructo-2-kinase 1 OS=Saccharomyces cerevisiae (strain ATCC 204508 / S288c) GN=PFK26 PE=1 SV=1
P11075	SEC7 (P11075)	2.60364e-05	2.65124e-05	2.86531e+06	1.49862e+07	5.2302	Protein transport protein SEC7 OS=Saccharomyces cerevisiae (strain ATCC 204508 / S288c) GN=SEC7 PE=1 SV=2
P53839	GOR1 (P53839)	2.99629e-06	4.53519e-06	1.40858e+06	7.31801e+06	5.19531	Glyoxylate reductase 1 OS=Saccharomyces cerevisiae (strain ATCC 204508 / S288c) GN=GOR1 PE=1 SV=1
P38325	OM14 (P38325)	0.00196653	0.00102543	741734	3.80881e+06	5.13501	Mitochondrial outer membrane protein OM14 OS=Saccharomyces cerevisiae (strain ATCC 204508 / S288c) GN=OM14 PE=1 SV=1
P32191	GUT2 (P32191)	7.78057e-09	5.9151e-08	1.59718e+06	8.10925e+06	5.07723	Glycerol-3-phosphate dehydrogenase, mitochondrial OS=Saccharomyces cerevisiae (strain ATCC 204508 / S288c) GN=GUT2 PE=1 SV=2
P40017	YAT2 (P40017)	9.26653e-05	7.72994e-05	50572.9	255262	5.0474	Carnitine O-acetyltransferase YAT2 OS=Saccharomyces cerevisiae (strain ATCC 204508 / S288c) GN=YAT2 PE=1 SV=1
P39714	BDH1 (P39714)	1.77349e-10	5.9296e-09	1.64242e+06	8.06917e+06	4.91299	(R,R)-butanediol dehydrogenase OS=Saccharomyces cerevisiae (strain ATCC 204508 / S288c) GN=BDH1 PE=1 SV=2
P41696	AZF1 (P41696)	7.73029e-06	9.61273e-06	17440.7	85446.3	4.89925	Asparagine-rich zinc finger protein AZF1 OS=Saccharomyces cerevisiae (strain ATCC 204508 / S288c) GN=AZF1 PE=1 SV=1
P0CT04		2.07505e-07	5.95808e-07	5.79434e+06	2.82209e+07	4.87042	Protease B inhibitor 2 OS=Saccharomyces cerevisiae (strain ATCC 204508 / S288c) GN=PBI2 PE=1 SV=1
Q01519	COX12 (Q01519)	8.54725e-07	1.73806e-06	2.68957e+06	1.30405e+07	4.84854	Cytochrome c oxidase subunit 6B OS=Saccharomyces cerevisiae (strain ATCC 204508 / S288c) GN=COX12 PE=1 SV=2
P04037	COX4 (P04037)	2.83614e-07	7.58963e-07	5.87158e+06	2.84549e+07	4.84621	Cytochrome c oxidase subunit 4, mitochondrial OS=Saccharomyces cerevisiae (strain ATCC 204508 / S288c) GN=COX4 PE=1 SV=1
P40215	NDE1 (P40215)	5.65165e-09	4.7861e-08	6.09072e+06	2.92108e+07	4.79595	External NADH-ubiquinone oxidoreductase 1, mitochondrial OS=Saccharomyces cerevisiae (strain ATCC 204508 / S288c) GN=NDE1 PE=1 SV=1
P37267	CBP4 (P37267)	1.16438e-06	2.21945e-06	115564	553630	4.79068	Assembly factor CBP4 OS=Saccharomyces cerevisiae (strain ATCC 204508 / S288c) GN=CBP4 PE=1 SV=3
P25357	SNT1 (P25357)	9.47766e-07	1.89845e-06	254846	1.22051e+06	4.78922	Probable DNA-binding protein SNT1 OS=Saccharomyces cerevisiae (strain ATCC 204508 / S288c) GN=SNT1 PE=1 SV=2
Q12349	ATP14 (Q12349)	1.45328e-09	1.94452e-08	5.69684e+06	2.71177e+07	4.76013	ATP synthase subunit H, mitochondrial OS=Saccharomyces cerevisiae (strain ATCC 204508 / S288c) GN=ATP14 PE=1 SV=1
P40030	ERG28 (P40030)	0.000295518	0.000202359	144961	686578	4.7363	Ergosterol biosynthetic protein 28 OS=Saccharomyces cerevisiae (strain ATCC 204508 / S288c) GN=ERG28 PE=1 SV=1
P32316	ACH1 (P32316)	4.03467e-06	5.74306e-06	3.43253e+06	1.6254e+07	4.73529	Acetyl-CoA hydrolase OS=Saccharomyces cerevisiae (strain ATCC 204508 / S288c) GN=ACH1 PE=1 SV=2
P08067	RIP1 (P08067)	2.04899e-07	5.95808e-07	2.96917e+06	1.40583e+07	4.73475	Cytochrome b-c1 complex subunit Rieske, mitochondrial OS=Saccharomyces cerevisiae (strain ATCC 204508 / S288c) GN=RIP1 PE=1 SV=1
P28240	ICL1 (P28240)	9.70368e-08	3.52819e-07	1.13124e+06	5.28097e+06	4.6683	Isocitrate lyase OS=Saccharomyces cerevisiae (strain ATCC 204508 / S288c) GN=ICL1 PE=1 SV=1
P06115	CTT1 (P06115)	1.17108e-06	2.21945e-06	71509.6	329734	4.61104	Catalase T OS=Saccharomyces cerevisiae (strain ATCC 204508 / S288c) GN=CTT1 PE=1 SV=3
P34164	SIP2 (P34164)	2.7125e-05	2.74566e-05	76894.8	354214	4.60648	SNF1 protein kinase subunit beta-2 OS=Saccharomyces cerevisiae (strain ATCC 204508 / S288c) GN=SIP2 PE=1 SV=3
P53266	SHY1 (P53266)	2.14105e-07	6.09527e-07	34704.8	159459	4.59473	Cytochrome oxidase assembly protein SHY1 OS=Saccharomyces cerevisiae (strain ATCC 204508 / S288c) GN=SHY1 PE=1 SV=1
P38773	DOG2 (P38773)	4.89186e-12	4.6753e-10	1.21884e+06	5.52352e+06	4.53179	2-deoxyglucose-6-phosphate phosphatase 2 OS=Saccharomyces cerevisiae (strain ATCC 204508 / S288c) GN=DOG2 PE=1 SV=1
P81449	TIM11 (P81449)	1.08048e-08	7.30153e-08	4.69643e+06	2.1281e+07	4.53131	ATP synthase subunit e, mitochondrial OS=Saccharomyces cerevisiae (strain ATCC 204508 / S288c) GN=TIM11 PE=1 SV=2
Q06137	YLR345W (Q06137)	5.11914e-06	6.82223e-06	111732	501535	4.48874	Putative 6-phosphofructo-2-kinase/fructose-2,6-bisphosphatase YLR345W OS=Saccharomyces cerevisiae (strain ATCC 204508 / S288c) GN=YLR345W PE=1 SV=1
P40043	RGI1 (P40043)	2.54847e-05	2.61496e-05	7.93349e+06	3.55133e+07	4.47637	Respiratory growth induced protein 1 OS=Saccharomyces cerevisiae (strain ATCC 204508 / S288c) GN=RGI1 PE=1 SV=1
Q08230	EMI5 (Q08230)	3.73471e-07	9.1655e-07	90822.9	404932	4.45847	Succinate dehydrogenase assembly factor 2, mitochondrial OS=Saccharomyces cerevisiae (strain ATCC 204508 / S288c) GN=SDH5 PE=1 SV=1
Q06405	ATP17 (Q06405)	3.24983e-08	1.6471e-07	1.92024e+06	8.47817e+06	4.41516	ATP synthase subunit f, mitochondrial OS=Saccharomyces cerevisiae (strain ATCC 204508 / S288c) GN=ATP17 PE=1 SV=1
P53228	NQM1 (P53228)	8.61979e-06	1.0447e-05	342427	1.49637e+06	4.36989	Transaldolase NQM1 OS=Saccharomyces cerevisiae (strain ATCC 204508 / S288c) GN=NQM1 PE=1 SV=1
P16965	STF2 (P16965)	4.85239e-06	6.61161e-06	1.30483e+06	5.63042e+06	4.31507	ATPase-stabilizing factor 15 kDa protein OS=Saccharomyces cerevisiae (strain ATCC 204508 / S288c) GN=STF2 PE=1 SV=2
P33421	SDH3 (P33421)	1.50544e-07	4.70633e-07	1.04525e+06	4.46548e+06	4.27217	Succinate dehydrogenase [ubiquinone] cytochrome b subunit, mitochondrial OS=Saccharomyces cerevisiae (strain ATCC 204508 / S288c) GN=SDH3 PE=1 SV=1
P00331	ADH2 (P00331)	2.23226e-07	6.27481e-07	1.41754e+07	6.04713e+07	4.26594	Alcohol dehydrogenase 2 OS=Saccharomyces cerevisiae (strain ATCC 204508 / S288c) GN=ADH2 PE=1 SV=3
P22855	AMS1 (P22855)	3.19541e-05	3.14377e-05	78642.1	335385	4.2647	Alpha-mannosidase OS=Saccharomyces cerevisiae (strain ATCC 204508 / S288c) GN=AMS1 PE=1 SV=2
P32796	CAT2 (P32796)	0.000524485	0.000333226	10261.4	43555	4.24456	Carnitine O-acetyltransferase, mitochondrial OS=Saccharomyces cerevisiae (strain ATCC 204508 / S288c) GN=CAT2 PE=1 SV=2
P19262	KGD2 (P19262)	4.5878e-09	4.19975e-08	1.56025e+07	6.59884e+07	4.22936	Dihydrolipoyllysine-residue succinyltransferase component of 2-oxoglutarate dehydrogenase complex, mitochondrial OS=Saccharomyces cerevisiae (strain ATCC 204508 / S288c) GN=KGD2 PE=1 SV=2
P00427	COX6 (P00427)	5.55616e-07	1.22052e-06	4.06752e+06	1.71834e+07	4.22455	Cytochrome c oxidase subunit 6, mitochondrial OS=Saccharomyces cerevisiae (strain ATCC 204508 / S288c) GN=COX6 PE=1 SV=1
Q03533	TDA1 (Q03533)	4.91089e-08	2.31369e-07	310588	1.3045e+06	4.20009	Serine/threonine-protein kinase TDA1 OS=Saccharomyces cerevisiae (strain ATCC 204508 / S288c) GN=TDA1 PE=1 SV=1
P48237	CCM1 (P48237)	0.000185984	0.000137335	88542.8	370944	4.18944	Mitochondrial group I intron splicing factor CCM1 OS=Saccharomyces cerevisiae (strain ATCC 204508 / S288c) GN=CCM1 PE=1 SV=1
P80235	YAT1 (P80235)	3.61701e-05	3.47675e-05	106748	438888	4.11143	Putative mitochondrial carnitine O-acetyltransferase OS=Saccharomyces cerevisiae (strain ATCC 204508 / S288c) GN=YAT1 PE=1 SV=2
P21801	SDH2 (P21801)	2.96112e-07	7.76872e-07	2.79426e+06	1.1479e+07	4.10807	Succinate dehydrogenase [ubiquinone] iron-sulfur subunit, mitochondrial OS=Saccharomyces cerevisiae (strain ATCC 204508 / S288c) GN=SDH2 PE=1 SV=1
P32891	DLD1 (P32891)	9.67913e-08	3.52819e-07	2.08954e+06	8.52591e+06	4.08028	D-lactate dehydrogenase [cytochrome] 1, mitochondrial OS=Saccharomyces cerevisiae (strain ATCC 204508 / S288c) GN=DLD1 PE=1 SV=2
P53305	RSM27 (P53305)	2.54881e-08	1.35332e-07	200409	810052	4.04199	Mitochondrial 37S ribosomal protein S27 OS=Saccharomyces cerevisiae (strain ATCC 204508 / S288c) GN=RSM27 PE=1 SV=1
Q12123	DCS2 (Q12123)	1.38693e-05	1.56471e-05	255247	1.01589e+06	3.98001	Inactive diphosphatase DCS2 OS=Saccharomyces cerevisiae (strain ATCC 204508 / S288c) GN=DCS2 PE=1 SV=3
P18239	PET9 (P18239)	1.94998e-10	5.9296e-09	3.03382e+07	1.19688e+08	3.94511	ADP,ATP carrier protein 2 OS=Saccharomyces cerevisiae (strain ATCC 204508 / S288c) GN=PET9 PE=1 SV=2
P42847	MRPS18 (P42847)	3.84724e-07	9.34796e-07	317121	1.24638e+06	3.9303	37S ribosomal protein S18, mitochondrial OS=Saccharomyces cerevisiae (strain ATCC 204508 / S288c) GN=MRPS18 PE=1 SV=2
P37012	PGM2 (P37012)	3.24517e-07	8.30031e-07	7.15406e+06	2.7811e+07	3.88745	Phosphoglucomutase 2 OS=Saccharomyces cerevisiae (strain ATCC 204508 / S288c) GN=PGM2 PE=1 SV=1
P36534	MRPL40 (P36534)	2.33585e-09	2.79056e-08	742619	2.88166e+06	3.8804	54S ribosomal protein L40, mitochondrial OS=Saccharomyces cerevisiae (strain ATCC 204508 / S288c) GN=MRPL40 PE=1 SV=2
P14063	MRPL31 (P14063)	3.89504e-05	3.69621e-05	388710	1.49427e+06	3.84418	54S ribosomal protein L31, mitochondrial OS=Saccharomyces cerevisiae (strain ATCC 204508 / S288c) GN=MRPL31 PE=1 SV=1
P07256	COR1 (P07256)	1.19895e-09	1.8234e-08	9.47449e+06	3.603e+07	3.80285	Cytochrome b-c1 complex subunit 1, mitochondrial OS=Saccharomyces cerevisiae (strain ATCC 204508 / S288c) GN=COR1 PE=1 SV=1
Q03028	ODC1 (Q03028)	6.06667e-07	1.30925e-06	792555	3.01101e+06	3.79912	Mitochondrial 2-oxodicarboxylate carrier 1 OS=Saccharomyces cerevisiae (strain ATCC 204508 / S288c) GN=ODC1 PE=1 SV=1
P36148	GPT2 (P36148)	1.57797e-08	9.95927e-08	800241	3.02407e+06	3.77895	Glycerol-3-phosphate O-acyltransferase 2 OS=Saccharomyces cerevisiae (strain ATCC 204508 / S288c) GN=GPT2 PE=1 SV=1
P14065	GCY1 (P14065)	1.7067e-07	5.12707e-07	1.1326e+06	4.25978e+06	3.76106	Glycerol 2-dehydrogenase (NADP(+)) OS=Saccharomyces cerevisiae (strain ATCC 204508 / S288c) GN=GCY1 PE=1 SV=1
P33303	SFC1 (P33303)	0.000108522	8.78961e-05	129110	484026	3.74893	Succinate/fumarate mitochondrial transporter OS=Saccharomyces cerevisiae (strain ATCC 204508 / S288c) GN=SFC1 PE=1 SV=2
Q03430	RSM28 (Q03430)	0.00356205	0.00168652	401602	1.49666e+06	3.72673	37S ribosomal protein RSM28, mitochondrial OS=Saccharomyces cerevisiae (strain ATCC 204508 / S288c) GN=RSM28 PE=1 SV=2
P07251	ATP1 (P07251)	5.3842e-11	2.77084e-09	3.11449e+07	1.15942e+08	3.72264	ATP synthase subunit alpha, mitochondrial OS=Saccharomyces cerevisiae (strain ATCC 204508 / S288c) GN=ATP1 PE=1 SV=5
P36060	MCR1 (P36060)	9.95237e-09	6.93567e-08	5.05945e+06	1.88333e+07	3.7224	NADH-cytochrome b5 reductase 2 OS=Saccharomyces cerevisiae (strain ATCC 204508 / S288c) GN=MCR1 PE=1 SV=1
P36531	MRPL36 (P36531)	2.03854e-10	5.9296e-09	565183	2.10233e+06	3.71974	54S ribosomal protein L36, mitochondrial OS=Saccharomyces cerevisiae (strain ATCC 204508 / S288c) GN=MRPL36 PE=1 SV=3
P30902	ATP7 (P30902)	1.67516e-09	2.19745e-08	7.8531e+06	2.9024e+07	3.69586	ATP synthase subunit d, mitochondrial OS=Saccharomyces cerevisiae (strain ATCC 204508 / S288c) GN=ATP7 PE=1 SV=2
Q12233	ATP20 (Q12233)	7.53394e-08	2.94754e-07	1.88963e+06	6.96782e+06	3.6874	ATP synthase subunit g, mitochondrial OS=Saccharomyces cerevisiae (strain ATCC 204508 / S288c) GN=ATP20 PE=1 SV=1
P53836	CAF120 (P53836)	0.000134105	0.000104688	48655.9	179313	3.68533	CCR4-NOT transcriptional complex subunit CAF120 OS=Saccharomyces cerevisiae (strain ATCC 204508 / S288c) GN=CAF120 PE=1 SV=1
P15992	HSP26 (P15992)	1.09757e-12	1.46857e-10	1.59898e+07	5.88816e+07	3.68244	Heat shock protein 26 OS=Saccharomyces cerevisiae (strain ATCC 204508 / S288c) GN=HSP26 PE=1 SV=3
P14306	TFS1 (P14306)	1.63748e-06	2.86778e-06	902319	3.29684e+06	3.65374	Carboxypeptidase Y inhibitor OS=Saccharomyces cerevisiae (strain ATCC 204508 / S288c) GN=TFS1 PE=1 SV=2
P04840	POR1 (P04840)	1.02129e-10	4.43283e-09	6.0447e+07	2.20276e+08	3.64412	Mitochondrial outer membrane protein porin 1 OS=Saccharomyces cerevisiae (strain ATCC 204508 / S288c) GN=POR1 PE=1 SV=4
P32190	GUT1 (P32190)	4.89503e-08	2.31369e-07	334230	1.21519e+06	3.6358	Glycerol kinase OS=Saccharomyces cerevisiae (strain ATCC 204508 / S288c) GN=GUT1 PE=3 SV=1
P42826	XKS1 (P42826)	6.30561e-08	2.74367e-07	259709	939292	3.61671	Xylulose kinase OS=Saccharomyces cerevisiae (strain ATCC 204508 / S288c) GN=XKS1 PE=1 SV=2
P06738	GPH1 (P06738)	7.04167e-08	2.84245e-07	7.38556e+06	2.65243e+07	3.59137	Glycogen phosphorylase OS=Saccharomyces cerevisiae (strain ATCC 204508 / S288c) GN=GPH1 PE=1 SV=4
Q12287	COX17 (Q12287)	3.02666e-08	1.5457e-07	966024	3.43856e+06	3.5595	Cytochrome c oxidase copper chaperone OS=Saccharomyces cerevisiae (strain ATCC 204508 / S288c) GN=COX17 PE=1 SV=3
P07248	ADR1 (P07248)	1.70477e-08	1.05603e-07	612067	2.17064e+06	3.54641	Regulatory protein ADR1 OS=Saccharomyces cerevisiae (strain ATCC 204508 / S288c) GN=ADR1 PE=1 SV=2
Q02100	SKO1 (Q02100)	0.00401106	0.00187457	29807.7	104865	3.51807	CRE-binding bZIP protein SKO1 OS=Saccharomyces cerevisiae (strain ATCC 204508 / S288c) GN=SKO1 PE=1 SV=1
P53881	MRPL22 (P53881)	1.51308e-07	4.70823e-07	342643	1.19949e+06	3.5007	54S ribosomal protein L22, mitochondrial OS=Saccharomyces cerevisiae (strain ATCC 204508 / S288c) GN=MRPL22 PE=1 SV=2
P00854	ATP6 (P00854)	3.54043e-08	1.78089e-07	247639	861830	3.48019	ATP synthase subunit a OS=Saccharomyces cerevisiae (strain ATCC 204508 / S288c) GN=ATP6 PE=1 SV=2
P25642	IMG2 (P25642)	3.41192e-06	5.00572e-06	186864	649692	3.47681	54S ribosomal protein IMG2, mitochondrial OS=Saccharomyces cerevisiae (strain ATCC 204508 / S288c) GN=IMG2 PE=1 SV=2
P53615	NCE103 (P53615)	0.000365825	0.000244497	590001	2.04953e+06	3.47378	Carbonic anhydrase OS=Saccharomyces cerevisiae (strain ATCC 204508 / S288c) GN=NCE103 PE=1 SV=1
Q03713	AIM31 (Q03713)	6.90078e-09	5.46787e-08	337185	1.1709e+06	3.47256	Respiratory supercomplex factor 1, mitochondrial OS=Saccharomyces cerevisiae (strain ATCC 204508 / S288c) GN=RCF1 PE=1 SV=1
P09457	ATP5 (P09457)	8.27445e-09	6.01706e-08	5.31599e+06	1.8249e+07	3.43286	ATP synthase subunit 5, mitochondrial OS=Saccharomyces cerevisiae (strain ATCC 204508 / S288c) GN=ATP5 PE=1 SV=1
P01119	RAS1 (P01119)	0.266749	0.0675465	1.89278e+06	6.48896e+06	3.42827	Ras-like protein 1 OS=Saccharomyces cerevisiae (strain ATCC 204508 / S288c) GN=RAS1 PE=1 SV=2
P23641	MIR1 (P23641)	1.0696e-08	7.30153e-08	2.28821e+07	7.82241e+07	3.41857	Mitochondrial phosphate carrier protein OS=Saccharomyces cerevisiae (strain ATCC 204508 / S288c) GN=MIR1 PE=1 SV=1
P28778	MRP17 (P28778)	1.9918e-07	5.81892e-07	46818.1	159408	3.40484	37S ribosomal protein MRP17, mitochondrial OS=Saccharomyces cerevisiae (strain ATCC 204508 / S288c) GN=MRP17 PE=1 SV=1
P38064	MRPL16 (P38064)	0.000134343	0.000104691	53386.4	181695	3.4034	54S ribosomal protein L16, mitochondrial OS=Saccharomyces cerevisiae (strain ATCC 204508 / S288c) GN=MRPL16 PE=1 SV=1
P00830	ATP2 (P00830)	2.71795e-09	2.98089e-08	3.55217e+07	1.20161e+08	3.38276	ATP synthase subunit beta, mitochondrial OS=Saccharomyces cerevisiae (strain ATCC 204508 / S288c) GN=ATP2 PE=1 SV=2
Q12008	GPM2 (Q12008)	1.93858e-08	1.17903e-07	76525.4	257399	3.36358	Phosphoglycerate mutase 2 OS=Saccharomyces cerevisiae (strain ATCC 204508 / S288c) GN=GPM2 PE=1 SV=1
Q12165	ATP16 (Q12165)	1.21171e-09	1.8234e-08	1.24748e+07	4.18567e+07	3.3553	ATP synthase subunit delta, mitochondrial OS=Saccharomyces cerevisiae (strain ATCC 204508 / S288c) GN=ATP16 PE=1 SV=1
P32904	MRPL6 (P32904)	2.70065e-09	2.98089e-08	192874	646387	3.35134	54S ribosomal protein L6, mitochondrial OS=Saccharomyces cerevisiae (strain ATCC 204508 / S288c) GN=MRPL6 PE=1 SV=2
P18411	FUN14 (P18411)	2.68048e-07	7.34341e-07	335782	1.12499e+06	3.35035	Protein FUN14 OS=Saccharomyces cerevisiae (strain ATCC 204508 / S288c) GN=FUN14 PE=1 SV=3
P39965	AIM10 (P39965)	2.76232e-07	7.45169e-07	187739	622944	3.31814	Probable proline--tRNA ligase, mitochondrial OS=Saccharomyces cerevisiae (strain ATCC 204508 / S288c) GN=AIM10 PE=1 SV=1
P38077	ATP3 (P38077)	1.19618e-10	4.44589e-09	1.37229e+07	4.544e+07	3.31126	ATP synthase subunit gamma, mitochondrial OS=Saccharomyces cerevisiae (strain ATCC 204508 / S288c) GN=ATP3 PE=1 SV=1
P32799	COX13 (P32799)	4.22064e-06	5.8949e-06	685566	2.26074e+06	3.29763	Cytochrome c oxidase subunit 6A, mitochondrial OS=Saccharomyces cerevisiae (strain ATCC 204508 / S288c) GN=COX13 PE=1 SV=1
P11633	NHP6B (P11633)	0.0119356	0.00483065	134033	441927	3.29714	Non-histone chromosomal protein 6B OS=Saccharomyces cerevisiae (strain ATCC 204508 / S288c) GN=NHP6B PE=1 SV=3
P48527	MSY1 (P48527)	8.23983e-06	1.01333e-05	84763.6	278700	3.28797	Tyrosine--tRNA ligase, mitochondrial OS=Saccharomyces cerevisiae (strain ATCC 204508 / S288c) GN=MSY1 PE=1 SV=1
Q02950	MRP51 (Q02950)	0.000106156	8.65033e-05	147872	482128	3.26044	37S ribosomal protein MRP51, mitochondrial OS=Saccharomyces cerevisiae (strain ATCC 204508 / S288c) GN=MRP51 PE=1 SV=1
O60200	MDM35 (O60200)	3.85649e-07	9.34796e-07	160505	520686	3.24404	Mitochondrial distribution and morphology protein 35 OS=Saccharomyces cerevisiae (strain ATCC 204508 / S288c) GN=MDM35 PE=1 SV=3
P47150	RSM7 (P47150)	6.82444e-06	8.63067e-06	58567.9	187811	3.20672	37S ribosomal protein S7, mitochondrial OS=Saccharomyces cerevisiae (strain ATCC 204508 / S288c) GN=RSM7 PE=1 SV=1
P05626	ATP4 (P05626)	3.03706e-09	3.17473e-08	8.82955e+06	2.79483e+07	3.16532	ATP synthase subunit 4, mitochondrial OS=Saccharomyces cerevisiae (strain ATCC 204508 / S288c) GN=ATP4 PE=1 SV=2
P53598	LSC1 (P53598)	8.91442e-12	7.45481e-10	1.09041e+07	3.43433e+07	3.14957	Succinyl-CoA ligase [ADP-forming] subunit alpha, mitochondrial OS=Saccharomyces cerevisiae (strain ATCC 204508 / S288c) GN=LSC1 PE=1 SV=1
Q03327	UGO1 (Q03327)	1.571e-05	1.74588e-05	216185	677745	3.13502	Mitochondrial fusion and transport protein UGO1 OS=Saccharomyces cerevisiae (strain ATCC 204508 / S288c) GN=UGO1 PE=1 SV=3
P53292	MRPS35 (P53292)	9.51395e-09	6.69994e-08	247453	772156	3.12042	37S ribosomal protein S35, mitochondrial OS=Saccharomyces cerevisiae (strain ATCC 204508 / S288c) GN=MRPS35 PE=1 SV=1
P39713	BDH2 (P39713)	0.000673078	0.000412737	20394.9	63373.9	3.10734	Probable diacetyl reductase [(R)-acetoin forming] 2 OS=Saccharomyces cerevisiae (strain ATCC 204508 / S288c) GN=BDH2 PE=1 SV=1
Q06630	MHR1 (Q06630)	8.76705e-09	6.30672e-08	349150	1.08318e+06	3.10233	Mitochondrial homologous recombination protein 1 OS=Saccharomyces cerevisiae (strain ATCC 204508 / S288c) GN=MHR1 PE=1 SV=1
P38427	TSL1 (P38427)	1.19057e-07	4.07871e-07	2.53125e+06	7.84769e+06	3.10033	Trehalose synthase complex regulatory subunit TSL1 OS=Saccharomyces cerevisiae (strain ATCC 204508 / S288c) GN=TSL1 PE=1 SV=1
P23337	GSY1 (P23337)	5.02013e-06	6.73436e-06	1.93197e+06	5.94818e+06	3.07882	Glycogen [starch] synthase isoform 1 OS=Saccharomyces cerevisiae (strain ATCC 204508 / S288c) GN=GSY1 PE=1 SV=3
P53219	IMO32 (P53219)	9.85124e-06	1.17062e-05	105693	325329	3.07807	Abhydrolase domain-containing protein IMO32 OS=Saccharomyces cerevisiae (strain ATCC 204508 / S288c) GN=IMO32 PE=1 SV=1
Q96VH5	MOS1 (Q96VH5)	7.13876e-08	2.84245e-07	1.50879e+06	4.64336e+06	3.07754	MICOS complex subunit MIC10 OS=Saccharomyces cerevisiae (strain ATCC 204508 / S288c) GN=MIC10 PE=1 SV=1
P53312	LSC2 (P53312)	4.91827e-11	2.74198e-09	5.54602e+06	1.70595e+07	3.07598	Succinyl-CoA ligase [ADP-forming] subunit beta, mitochondrial OS=Saccharomyces cerevisiae (strain ATCC 204508 / S288c) GN=LSC2 PE=1 SV=1
P32604	FBP26 (P32604)	5.69219e-06	7.40883e-06	320915	979948	3.0536	Fructose-2,6-bisphosphatase OS=Saccharomyces cerevisiae (strain ATCC 204508 / S288c) GN=FBP26 PE=1 SV=2
P38235	YBR053C (P38235)	4.64538e-09	4.19975e-08	886869	2.68917e+06	3.0322	Uncharacterized protein YBR053C OS=Saccharomyces cerevisiae (strain ATCC 204508 / S288c) GN=YBR053C PE=1 SV=1
P17558	PET123 (P17558)	1.48615e-08	9.65292e-08	347403	1.04682e+06	3.01327	37S ribosomal protein PET123, mitochondrial OS=Saccharomyces cerevisiae (strain ATCC 204508 / S288c) GN=PET123 PE=1 SV=1
P23585	HXT2 (P23585)	1.20104e-07	4.07871e-07	1.92861e+07	5.78637e+07	3.00028	High-affinity glucose transporter HXT2 OS=Saccharomyces cerevisiae (strain ATCC 204508 / S288c) GN=HXT2 PE=1 SV=1
P32611	RML2 (P32611)	9.47791e-07	1.89845e-06	680118	2.0374e+06	2.99565	54S ribosomal protein RML2, mitochondrial OS=Saccharomyces cerevisiae (strain ATCC 204508 / S288c) GN=RML2 PE=1 SV=1
P19955	YMR31 (P19955)	2.50981e-08	1.34327e-07	1.13046e+06	3.38065e+06	2.99052	37S ribosomal protein YMR-31, mitochondrial OS=Saccharomyces cerevisiae (strain ATCC 204508 / S288c) GN=YMR31 PE=1 SV=1
Q06251	YLR177W (Q06251)	9.41426e-05	7.83364e-05	34214.2	102009	2.98148	Uncharacterized protein YLR177W OS=Saccharomyces cerevisiae (strain ATCC 204508 / S288c) GN=YLR177W PE=1 SV=1
P38182	ATG8 (P38182)	0.0030848	0.00149657	47298.3	140590	2.97242	Autophagy-related protein 8 OS=Saccharomyces cerevisiae (strain ATCC 204508 / S288c) GN=ATG8 PE=1 SV=1
P18961	YPK2 (P18961)	5.15433e-08	2.36185e-07	115975	344291	2.96866	Serine/threonine-protein kinase YPK2/YKR2 OS=Saccharomyces cerevisiae (strain ATCC 204508 / S288c) GN=YPK2 PE=1 SV=1
P53076	VID30 (P53076)	3.95748e-09	3.89352e-08	205012	606827	2.95996	Vacuolar import and degradation protein 30 OS=Saccharomyces cerevisiae (strain ATCC 204508 / S288c) GN=VID30 PE=1 SV=1
P36139	PET10 (P36139)	2.45994e-06	3.9091e-06	828999	2.44164e+06	2.94529	Protein PET10 OS=Saccharomyces cerevisiae (strain ATCC 204508 / S288c) GN=PET10 PE=1 SV=3
P50087	MOS2 (P50087)	4.16518e-09	3.95429e-08	432945	1.27445e+06	2.94367	MICOS subunit MIC26 OS=Saccharomyces cerevisiae (strain ATCC 204508 / S288c) GN=MIC26 PE=1 SV=1
P32902	MRP4 (P32902)	2.58598e-08	1.36224e-07	734692	2.15667e+06	2.93548	37S ribosomal protein MRP4, mitochondrial OS=Saccharomyces cerevisiae (strain ATCC 204508 / S288c) GN=MRP4 PE=1 SV=1
P33759	MRPS5 (P33759)	9.75059e-07	1.93568e-06	509440	1.49178e+06	2.92828	37S ribosomal protein S5, mitochondrial OS=Saccharomyces cerevisiae (strain ATCC 204508 / S288c) GN=MRPS5 PE=1 SV=1
Q06408	ARO10 (Q06408)	0.00154095	0.000834069	1.85263e+06	5.36295e+06	2.89478	Transaminated amino acid decarboxylase OS=Saccharomyces cerevisiae (strain ATCC 204508 / S288c) GN=ARO10 PE=1 SV=1
Q12305	RDL1 (Q12305)	1.68486e-06	2.92776e-06	1.09985e+07	3.1813e+07	2.89249	Thiosulfate sulfurtransferase RDL1, mitochondrial OS=Saccharomyces cerevisiae (strain ATCC 204508 / S288c) GN=RDL1 PE=1 SV=1
P00410	COX2 (P00410)	0.000108088	8.7772e-05	3.70041e+06	1.06912e+07	2.88918	Cytochrome c oxidase subunit 2 OS=Saccharomyces cerevisiae (strain ATCC 204508 / S288c) GN=COX2 PE=1 SV=1
P53733	RSM19 (P53733)	2.51771e-07	7.01822e-07	445154	1.28397e+06	2.88432	37S ribosomal protein S19, mitochondrial OS=Saccharomyces cerevisiae (strain ATCC 204508 / S288c) GN=RSM19 PE=1 SV=1
P28263	UBC8 (P28263)	0.000378897	0.000251968	164847	472340	2.86533	Ubiquitin-conjugating enzyme E2-24 kDa OS=Saccharomyces cerevisiae (strain ATCC 204508 / S288c) GN=UBC8 PE=1 SV=2
P20967	KGD1 (P20967)	1.93875e-09	2.44725e-08	6.25611e+06	1.79074e+07	2.86238	2-oxoglutarate dehydrogenase, mitochondrial OS=Saccharomyces cerevisiae (strain ATCC 204508 / S288c) GN=KGD1 PE=1 SV=2
Q12396	EMP46 (Q12396)	2.7579e-07	7.45169e-07	99983.9	285060	2.85106	Protein EMP46 OS=Saccharomyces cerevisiae (strain ATCC 204508 / S288c) GN=EMP46 PE=1 SV=1
P06244	TPK1 (P06244)	2.50136e-05	2.57848e-05	506493	1.4397e+06	2.8425	cAMP-dependent protein kinase type 1 OS=Saccharomyces cerevisiae (strain ATCC 204508 / S288c) GN=TPK1 PE=1 SV=3
Q3E841	YNR034W-A (Q3E841)	2.11235e-05	2.22549e-05	2.83346e+06	7.97905e+06	2.81601	Uncharacterized protein YNR034W-A OS=Saccharomyces cerevisiae (strain ATCC 204508 / S288c) GN=YNR034W-A PE=1 SV=1
P38884	AIM18 (P38884)	1.70772e-06	2.94516e-06	170767	478400	2.80148	Altered inheritance of mitochondria protein 18, mitochondrial OS=Saccharomyces cerevisiae (strain ATCC 204508 / S288c) GN=AIM18 PE=1 SV=1
P42938	TDA10 (P42938)	7.0955e-09	5.51973e-08	375703	1.05144e+06	2.79859	Probable ATP-dependent kinase TDA10 OS=Saccharomyces cerevisiae (strain ATCC 204508 / S288c) GN=TDA10 PE=1 SV=1
P34227	PRX1 (P34227)	3.86915e-06	5.54284e-06	3.30878e+06	9.24347e+06	2.79362	Mitochondrial peroxiredoxin PRX1 OS=Saccharomyces cerevisiae (strain ATCC 204508 / S288c) GN=PRX1 PE=1 SV=1
P02992	TUF1 (P02992)	2.87622e-09	3.05433e-08	1.45374e+07	4.04333e+07	2.78132	Elongation factor Tu, mitochondrial OS=Saccharomyces cerevisiae (strain ATCC 204508 / S288c) GN=TUF1 PE=1 SV=1
P12687	MRP7 (P12687)	4.09125e-08	2.01257e-07	407062	1.12863e+06	2.77262	54S ribosomal protein L2, mitochondrial OS=Saccharomyces cerevisiae (strain ATCC 204508 / S288c) GN=MRP7 PE=1 SV=1
P40208	GID8 (P40208)	1.00909e-06	1.99143e-06	88660	245671	2.77093	Glucose-induced degradation protein 8 OS=Saccharomyces cerevisiae (strain ATCC 204508 / S288c) GN=GID8 PE=1 SV=1
P43612	SAP155 (P43612)	4.97199e-09	4.37673e-08	235560	652449	2.76977	SIT4-associating protein SAP155 OS=Saccharomyces cerevisiae (strain ATCC 204508 / S288c) GN=SAP155 PE=1 SV=4
P47169	MET5 (P47169)	4.86303e-08	2.31369e-07	1.06607e+06	2.9431e+06	2.7607	Sulfite reductase [NADPH] subunit beta OS=Saccharomyces cerevisiae (strain ATCC 204508 / S288c) GN=MET5 PE=1 SV=1
P53885	MDG1 (P53885)	6.78187e-07	1.44036e-06	840401	2.31294e+06	2.75218	Signal transduction protein MDG1 OS=Saccharomyces cerevisiae (strain ATCC 204508 / S288c) GN=MDG1 PE=1 SV=1
P27929	NAM9 (P27929)	2.88097e-07	7.64841e-07	185420	510151	2.75133	37S ribosomal protein NAM9, mitochondrial OS=Saccharomyces cerevisiae (strain ATCC 204508 / S288c) GN=NAM9 PE=1 SV=2
P36519	MRPL7 (P36519)	3.13908e-09	3.22942e-08	531311	1.45865e+06	2.74538	54S ribosomal protein L7, mitochondrial OS=Saccharomyces cerevisiae (strain ATCC 204508 / S288c) GN=MRPL7 PE=1 SV=2
P33327	GDH2 (P33327)	5.24581e-08	2.37314e-07	4.53022e+06	1.24282e+07	2.74341	NAD-specific glutamate dehydrogenase OS=Saccharomyces cerevisiae (strain ATCC 204508 / S288c) GN=GDH2 PE=1 SV=1
P41903	TES1 (P41903)	0.00012813	0.000100967	218904	600374	2.74263	Peroxisomal acyl-coenzyme A thioester hydrolase 1 OS=Saccharomyces cerevisiae (strain ATCC 204508 / S288c) GN=TES1 PE=1 SV=1
Q12335	PST2 (Q12335)	7.10048e-08	2.84245e-07	2.64781e+07	7.26023e+07	2.74197	Protoplast secreted protein 2 OS=Saccharomyces cerevisiae (strain ATCC 204508 / S288c) GN=PST2 PE=1 SV=1
Q03104	MSC1 (Q03104)	9.6476e-06	1.14846e-05	1.0444e+06	2.85594e+06	2.73451	Meiotic sister chromatid recombination protein 1 OS=Saccharomyces cerevisiae (strain ATCC 204508 / S288c) GN=MSC1 PE=1 SV=1
P02381	VAR1 (P02381)	5.38311e-09	4.67709e-08	359055	979359	2.7276	Ribosomal protein VAR1, mitochondrial OS=Saccharomyces cerevisiae (strain ATCC 204508 / S288c) GN=VAR1 PE=1 SV=3
Q03786	YDR248C (Q03786)	2.28058e-05	2.38019e-05	73104.9	199016	2.72233	Probable gluconokinase OS=Saccharomyces cerevisiae (strain ATCC 204508 / S288c) GN=YDR248C PE=1 SV=1
P51998	YML6 (P51998)	0.000318458	0.000216297	890272	2.40939e+06	2.70635	54S ribosomal protein YmL6, mitochondrial OS=Saccharomyces cerevisiae (strain ATCC 204508 / S288c) GN=YML6 PE=1 SV=1
Q06108	RGC1 (Q06108)	0.000685192	0.000419397	41151	111199	2.70223	Regulator of the glycerol channel 1 OS=Saccharomyces cerevisiae (strain ATCC 204508 / S288c) GN=RGC1 PE=1 SV=1
Q06678	MRPL35 (Q06678)	3.22911e-07	8.30031e-07	642529	1.73454e+06	2.69954	54S ribosomal protein L35, mitochondrial OS=Saccharomyces cerevisiae (strain ATCC 204508 / S288c) GN=MRPL35 PE=1 SV=1
P11154	PYC1 (P11154)	9.16986e-06	1.09941e-05	7.41435e+06	1.99376e+07	2.68906	Pyruvate carboxylase 1 OS=Saccharomyces cerevisiae (strain ATCC 204508 / S288c) GN=PYC1 PE=1 SV=2
P40496	RSM25 (P40496)	5.01017e-06	6.73436e-06	240022	640111	2.66689	37S ribosomal protein S25, mitochondrial OS=Saccharomyces cerevisiae (strain ATCC 204508 / S288c) GN=RSM25 PE=1 SV=1
P50278	SOL1 (P50278)	0.0105098	0.00433222	771456	2.05701e+06	2.6664	6-phosphogluconolactonase-like protein 1 OS=Saccharomyces cerevisiae (strain ATCC 204508 / S288c) GN=SOL1 PE=1 SV=1
P40364	MPM1 (P40364)	2.58228e-06	4.05971e-06	898269	2.38976e+06	2.66041	Mitochondrial peculiar membrane protein 1 OS=Saccharomyces cerevisiae (strain ATCC 204508 / S288c) GN=MPM1 PE=1 SV=1
Q12374	NCA2 (Q12374)	0.000866604	0.00051171	223145	593105	2.65793	Nuclear control of ATPase protein 2 OS=Saccharomyces cerevisiae (strain ATCC 204508 / S288c) GN=NCA2 PE=1 SV=1
P36516	MRPL3 (P36516)	2.0901e-09	2.54237e-08	180483	475513	2.63467	54S ribosomal protein L3, mitochondrial OS=Saccharomyces cerevisiae (strain ATCC 204508 / S288c) GN=MRPL3 PE=1 SV=2
P40513	MAM33 (P40513)	2.52281e-09	2.95722e-08	4.44768e+06	1.16973e+07	2.62998	Mitochondrial acidic protein MAM33 OS=Saccharomyces cerevisiae (strain ATCC 204508 / S288c) GN=MAM33 PE=1 SV=1
P53316	YGR250C (P53316)	1.91617e-07	5.6473e-07	198212	518457	2.61567	Uncharacterized RNA-binding protein YGR250C OS=Saccharomyces cerevisiae (strain ATCC 204508 / S288c) GN=YGR250C PE=1 SV=1
P53184	PNC1 (P53184)	1.81704e-09	2.33774e-08	1.21975e+07	3.18537e+07	2.61149	Nicotinamidase OS=Saccharomyces cerevisiae (strain ATCC 204508 / S288c) GN=PNC1 PE=1 SV=1
Q04458	HFD1 (Q04458)	1.50495e-07	4.70633e-07	1.35382e+06	3.52612e+06	2.60458	Fatty aldehyde dehydrogenase HFD1 OS=Saccharomyces cerevisiae (strain ATCC 204508 / S288c) GN=HFD1 PE=1 SV=1
P25376	AGP1 (P25376)	0.0528945	0.0171449	100887	261779	2.59479	General amino acid permease AGP1 OS=Saccharomyces cerevisiae (strain ATCC 204508 / S288c) GN=AGP1 PE=1 SV=3
P53163	MNP1 (P53163)	2.31048e-05	2.40394e-05	6.63322e+06	1.71309e+07	2.58259	54S ribosomal protein L12, mitochondrial OS=Saccharomyces cerevisiae (strain ATCC 204508 / S288c) GN=MNP1 PE=1 SV=1
P21306	ATP15 (P21306)	6.78003e-08	2.78146e-07	5.30043e+06	1.36254e+07	2.57063	ATP synthase subunit epsilon, mitochondrial OS=Saccharomyces cerevisiae (strain ATCC 204508 / S288c) GN=ATP15 PE=1 SV=2
P07991	CAR2 (P07991)	1.16211e-07	4.02833e-07	2.50149e+07	6.41643e+07	2.56504	Ornithine aminotransferase OS=Saccharomyces cerevisiae (strain ATCC 204508 / S288c) GN=CAR2 PE=1 SV=2
P54114	ALD3 (P54114)	0.000132564	0.000103727	145476	373088	2.5646	Aldehyde dehydrogenase [NAD(P)+] 2 OS=Saccharomyces cerevisiae (strain ATCC 204508 / S288c) GN=ALD3 PE=1 SV=1
P47127	AIM24 (P47127)	2.45464e-08	1.34327e-07	1.11545e+06	2.85945e+06	2.56349	Altered inheritance of mitochondria protein 24, mitochondrial OS=Saccharomyces cerevisiae (strain ATCC 204508 / S288c) GN=AIM24 PE=1 SV=1
P53319	GND2 (P53319)	2.18253e-07	6.16092e-07	79727.4	204170	2.56085	6-phosphogluconate dehydrogenase, decarboxylating 2 OS=Saccharomyces cerevisiae (strain ATCC 204508 / S288c) GN=GND2 PE=1 SV=1
P40052	YER079W (P40052)	6.01774e-05	5.39669e-05	144943	370891	2.55887	Uncharacterized protein YER079W OS=Saccharomyces cerevisiae (strain ATCC 204508 / S288c) GN=YER079W PE=1 SV=1
P36010	YNK1 (P36010)	1.31345e-09	1.8696e-08	1.2688e+07	3.24338e+07	2.55627	Nucleoside diphosphate kinase OS=Saccharomyces cerevisiae (strain ATCC 204508 / S288c) GN=YNK1 PE=1 SV=1
P32335	MSS51 (P32335)	1.56085e-07	4.83439e-07	418742	1.06788e+06	2.55021	Protein MSS51, mitochondrial OS=Saccharomyces cerevisiae (strain ATCC 204508 / S288c) GN=MSS51 PE=1 SV=2
P53875	MRPL19 (P53875)	6.09162e-10	1.16439e-08	696343	1.76967e+06	2.54138	54S ribosomal protein L19, mitochondrial OS=Saccharomyces cerevisiae (strain ATCC 204508 / S288c) GN=MRPL19 PE=1 SV=1
Q12255	NYV1 (Q12255)	0.000177567	0.000132435	331363	840090	2.53526	Vacuolar v-SNARE NYV1 OS=Saccharomyces cerevisiae (strain ATCC 204508 / S288c) GN=NYV1 PE=1 SV=2
Q12525	MHT1 (Q12525)	1.13465e-10	4.44589e-09	578537	1.45859e+06	2.52117	Homocysteine S-methyltransferase 1 OS=Saccharomyces cerevisiae (strain ATCC 204508 / S288c) GN=MHT1 PE=1 SV=1
P27466	CMK1 (P27466)	1.13305e-06	2.18516e-06	498533	1.25584e+06	2.51907	Calcium/calmodulin-dependent protein kinase I OS=Saccharomyces cerevisiae (strain ATCC 204508 / S288c) GN=CMK1 PE=1 SV=2
P53274	YGR126W (P53274)	1.47668e-06	2.65698e-06	159144	400824	2.51862	Uncharacterized protein YGR126W OS=Saccharomyces cerevisiae (strain ATCC 204508 / S288c) GN=YGR126W PE=1 SV=1
P28834	IDH1 (P28834)	1.2118e-06	2.27727e-06	1.6139e+07	4.0253e+07	2.49415	Isocitrate dehydrogenase [NAD] subunit 1, mitochondrial OS=Saccharomyces cerevisiae (strain ATCC 204508 / S288c) GN=IDH1 PE=1 SV=2
Q07807	PUF3 (Q07807)	2.68924e-07	7.34341e-07	1.86728e+06	4.64758e+06	2.48896	mRNA-binding protein PUF3 OS=Saccharomyces cerevisiae (strain ATCC 204508 / S288c) GN=PUF3 PE=1 SV=1
P43594	AIM13 (P43594)	1.35217e-07	4.37013e-07	1.49387e+06	3.71313e+06	2.48558	MICOS complex subunit MIC19 OS=Saccharomyces cerevisiae (strain ATCC 204508 / S288c) GN=MIC19 PE=1 SV=1
Q03201	RSM10 (Q03201)	1.30057e-07	4.26518e-07	350833	871253	2.48339	37S ribosomal protein S10, mitochondrial OS=Saccharomyces cerevisiae (strain ATCC 204508 / S288c) GN=RSM10 PE=1 SV=1
Q12355	PST1 (Q12355)	0.00252499	0.00127107	429021	1.06046e+06	2.47182	Cell wall mannoprotein PST1 OS=Saccharomyces cerevisiae (strain ATCC 204508 / S288c) GN=PST1 PE=1 SV=1
P04807	HXK2 (P04807)	5.82867e-14	1.29982e-11	2.17867e+08	5.37609e+08	2.4676	Hexokinase-2 OS=Saccharomyces cerevisiae (strain ATCC 204508 / S288c) GN=HXK2 PE=1 SV=4
P10662	MRP1 (P10662)	1.06015e-10	4.43283e-09	1.04416e+06	2.57641e+06	2.46744	37S ribosomal protein MRP1, mitochondrial OS=Saccharomyces cerevisiae (strain ATCC 204508 / S288c) GN=MRP1 PE=1 SV=2
Q03361	JIP4 (Q03361)	0.000294514	0.000202086	11425.7	28034.3	2.45362	Uncharacterized protein JIP4 OS=Saccharomyces cerevisiae (strain ATCC 204508 / S288c) GN=JIP4 PE=1 SV=2
P36520	MRPL10 (P36520)	3.93455e-07	9.50274e-07	198537	486335	2.4496	54S ribosomal protein L10, mitochondrial OS=Saccharomyces cerevisiae (strain ATCC 204508 / S288c) GN=MRPL10 PE=1 SV=2
P23180	AIM17 (P23180)	1.18181e-05	1.36083e-05	3.29751e+06	7.93795e+06	2.40726	Probable oxidoreductase AIM17 OS=Saccharomyces cerevisiae (strain ATCC 204508 / S288c) GN=AIM17 PE=1 SV=2
Q03976	RSM24 (Q03976)	6.59922e-08	2.74367e-07	793533	1.90886e+06	2.40551	37S ribosomal protein S24, mitochondrial OS=Saccharomyces cerevisiae (strain ATCC 204508 / S288c) GN=RSM24 PE=1 SV=1
Q07688	YPD1 (Q07688)	0.0974613	0.0287363	763512	1.82933e+06	2.39594	Phosphorelay intermediate protein YPD1 OS=Saccharomyces cerevisiae (strain ATCC 204508 / S288c) GN=YPD1 PE=1 SV=1
P53278	YGR130C (P53278)	5.96432e-10	1.16439e-08	2.3448e+06	5.61693e+06	2.39549	Uncharacterized protein YGR130C OS=Saccharomyces cerevisiae (strain ATCC 204508 / S288c) GN=YGR130C PE=1 SV=1
P00424	COX5A (P00424)	7.1796e-05	6.22988e-05	6.6579e+06	1.59412e+07	2.39434	Cytochrome c oxidase polypeptide 5A, mitochondrial OS=Saccharomyces cerevisiae (strain ATCC 204508 / S288c) GN=COX5A PE=1 SV=1
P36112	FCJ1 (P36112)	1.20029e-08	7.87259e-08	2.5883e+06	6.19416e+06	2.39314	MICOS complex subunit MIC60 OS=Saccharomyces cerevisiae (strain ATCC 204508 / S288c) GN=MIC60 PE=1 SV=1
Q02204	MRPL13 (Q02204)	0.000116444	9.26304e-05	2.14897e+06	5.13554e+06	2.38976	54S ribosomal protein L13, mitochondrial OS=Saccharomyces cerevisiae (strain ATCC 204508 / S288c) GN=MRPL13 PE=1 SV=2
P38109	YBR139W (P38109)	4.63672e-06	6.3566e-06	866106	2.06956e+06	2.3895	Putative serine carboxypeptidase YBR139W OS=Saccharomyces cerevisiae (strain ATCC 204508 / S288c) GN=YBR139W PE=1 SV=1
P53315	SOL4 (P53315)	0.00018449	0.000136671	337098	804497	2.38654	6-phosphogluconolactonase 4 OS=Saccharomyces cerevisiae (strain ATCC 204508 / S288c) GN=SOL4 PE=1 SV=1
P22108	APA2 (P22108)	0.000229783	0.000163366	634794	1.51444e+06	2.38572	5',5'''-P-1,P-4-tetraphosphate phosphorylase 2 OS=Saccharomyces cerevisiae (strain ATCC 204508 / S288c) GN=APA2 PE=1 SV=1
Q04336	YMR196W (Q04336)	1.15485e-06	2.21945e-06	367347	875378	2.38297	Uncharacterized protein YMR196W OS=Saccharomyces cerevisiae (strain ATCC 204508 / S288c) GN=YMR196W PE=1 SV=1
P40893	REE1 (P40893)	1.16155e-05	1.33981e-05	1.42936e+07	3.39248e+07	2.37343	Regulation of enolase protein 1 OS=Saccharomyces cerevisiae (strain ATCC 204508 / S288c) GN=REE1 PE=1 SV=1
P49573	CTR1 (P49573)	2.79746e-07	7.5162e-07	4.54293e+06	1.0767e+07	2.37005	Copper transport protein CTR1 OS=Saccharomyces cerevisiae (strain ATCC 204508 / S288c) GN=CTR1 PE=1 SV=1
P47025	MDV1 (P47025)	0.000226576	0.000161601	122753	290760	2.36865	Mitochondrial division protein 1 OS=Saccharomyces cerevisiae (strain ATCC 204508 / S288c) GN=MDV1 PE=1 SV=1
P19414	ACO1 (P19414)	8.09171e-06	1.00064e-05	2.94029e+07	6.95403e+07	2.36508	Aconitate hydratase, mitochondrial OS=Saccharomyces cerevisiae (strain ATCC 204508 / S288c) GN=ACO1 PE=1 SV=2
P32898	CYM1 (P32898)	1.25555e-09	1.82603e-08	335778	791810	2.35814	Mitochondrial presequence protease OS=Saccharomyces cerevisiae (strain ATCC 204508 / S288c) GN=CYM1 PE=1 SV=2
P38804	RTC3 (P38804)	5.22352e-05	4.75455e-05	305924	720902	2.35648	Restriction of telomere capping protein 3 OS=Saccharomyces cerevisiae (strain ATCC 204508 / S288c) GN=RTC3 PE=1 SV=1
Q03860	TVP15 (Q03860)	3.64271e-07	9.02597e-07	972774	2.29204e+06	2.35619	Golgi apparatus membrane protein TVP15 OS=Saccharomyces cerevisiae (strain ATCC 204508 / S288c) GN=TVP15 PE=1 SV=1
Q04409	EMI2 (Q04409)	3.96572e-05	3.75015e-05	1.22997e+07	2.89506e+07	2.35377	Putative glucokinase-2 OS=Saccharomyces cerevisiae (strain ATCC 204508 / S288c) GN=EMI2 PE=1 SV=1
Q03799	MRPS8 (Q03799)	6.51012e-08	2.74367e-07	354527	833672	2.35151	37S ribosomal protein S8, mitochondrial OS=Saccharomyces cerevisiae (strain ATCC 204508 / S288c) GN=MRPS8 PE=1 SV=1
Q02896	YDC1 (Q02896)	1.74592e-06	2.99497e-06	724752	1.70084e+06	2.34679	Alkaline ceramidase YDC1 OS=Saccharomyces cerevisiae (strain ATCC 204508 / S288c) GN=YDC1 PE=1 SV=1
P28319	CWP1 (P28319)	8.3661e-07	1.71163e-06	1.98267e+07	4.64867e+07	2.34466	Cell wall protein CWP1 OS=Saccharomyces cerevisiae (strain ATCC 204508 / S288c) GN=CWP1 PE=1 SV=2
P10823	GPA2 (P10823)	2.08636e-05	2.20505e-05	207113	484633	2.33994	Guanine nucleotide-binding protein alpha-2 subunit OS=Saccharomyces cerevisiae (strain ATCC 204508 / S288c) GN=GPA2 PE=1 SV=2
P53925	YNL115C (P53925)	1.36973e-07	4.38451e-07	243010	567590	2.33567	Uncharacterized vacuolar membrane protein YNL115C OS=Saccharomyces cerevisiae (strain ATCC 204508 / S288c) GN=YNL115C PE=1 SV=1
P36528	MRPL17 (P36528)	9.38678e-07	1.89152e-06	499533	1.15967e+06	2.3215	54S ribosomal protein L17, mitochondrial OS=Saccharomyces cerevisiae (strain ATCC 204508 / S288c) GN=MRPL17 PE=1 SV=2
P17695	GRX2 (P17695)	1.06621e-07	3.75424e-07	5.47385e+06	1.26894e+07	2.31819	Glutaredoxin-2, mitochondrial OS=Saccharomyces cerevisiae (strain ATCC 204508 / S288c) GN=GRX2 PE=1 SV=3
P36521	MRPL11 (P36521)	1.98614e-05	2.1251e-05	328452	760531	2.3155	54S ribosomal protein L11, mitochondrial OS=Saccharomyces cerevisiae (strain ATCC 204508 / S288c) GN=MRPL11 PE=1 SV=2
Q02725	VTC3 (Q02725)	4.1928e-06	5.88033e-06	6.18561e+06	1.4313e+07	2.31391	Vacuolar transporter chaperone 3 OS=Saccharomyces cerevisiae (strain ATCC 204508 / S288c) GN=VTC3 PE=1 SV=1
Q04304	YMR090W (Q04304)	3.32436e-06	4.94269e-06	236901	547675	2.31183	UPF0659 protein YMR090W OS=Saccharomyces cerevisiae (strain ATCC 204508 / S288c) GN=YMR090W PE=1 SV=1
P09624	LPD1 (P09624)	3.13414e-10	7.76583e-09	1.5664e+07	3.61981e+07	2.31091	Dihydrolipoyl dehydrogenase, mitochondrial OS=Saccharomyces cerevisiae (strain ATCC 204508 / S288c) GN=LPD1 PE=1 SV=1
P38929	PMC1 (P38929)	9.13821e-07	1.847e-06	465354	1.06923e+06	2.29766	Calcium-transporting ATPase 2 OS=Saccharomyces cerevisiae (strain ATCC 204508 / S288c) GN=PMC1 PE=1 SV=1
P40159	YNL208W (P40159)	0.00183098	0.00096488	1.23537e+07	2.83137e+07	2.29193	Uncharacterized protein YNL208W OS=Saccharomyces cerevisiae (strain ATCC 204508 / S288c) GN=YNL208W PE=1 SV=2
Q12091	DAP1 (Q12091)	0.000460507	0.000296056	1.29873e+06	2.97495e+06	2.29066	Damage response protein 1 OS=Saccharomyces cerevisiae (strain ATCC 204508 / S288c) GN=DAP1 PE=1 SV=1
P53912	YNL134C (P53912)	3.74012e-07	9.1655e-07	5.14178e+06	1.16803e+07	2.27165	Uncharacterized protein YNL134C OS=Saccharomyces cerevisiae (strain ATCC 204508 / S288c) GN=YNL134C PE=1 SV=1
P38071	ETR1 (P38071)	9.19222e-10	1.57685e-08	4.23636e+06	9.59464e+06	2.26483	Enoyl-[acyl-carrier protein] reductase [NADPH, B-specific], mitochondrial OS=Saccharomyces cerevisiae (strain ATCC 204508 / S288c) GN=ETR1 PE=1 SV=3
P35719	MRP8 (P35719)	1.02352e-06	2.01397e-06	1.1494e+07	2.60208e+07	2.26385	Uncharacterized protein MRP8 OS=Saccharomyces cerevisiae (strain ATCC 204508 / S288c) GN=MRP8 PE=1 SV=1
Q12156	AIM7 (Q12156)	6.81841e-08	2.78146e-07	1.44311e+06	3.2661e+06	2.26324	Protein AIM7 OS=Saccharomyces cerevisiae (strain ATCC 204508 / S288c) GN=AIM7 PE=1 SV=1
P81450	ATP18 (P81450)	7.4315e-05	6.42533e-05	822986	1.85952e+06	2.25948	ATP synthase subunit J, mitochondrial OS=Saccharomyces cerevisiae (strain ATCC 204508 / S288c) GN=ATP18 PE=1 SV=1
P32451	BIO2 (P32451)	1.67772e-06	2.92477e-06	840481	1.89686e+06	2.25687	Biotin synthase, mitochondrial OS=Saccharomyces cerevisiae (strain ATCC 204508 / S288c) GN=BIO2 PE=1 SV=2
P35845	SWH1 (P35845)	6.9431e-05	6.07002e-05	814277	1.82673e+06	2.24337	Oxysterol-binding protein homolog 1 OS=Saccharomyces cerevisiae (strain ATCC 204508 / S288c) GN=SWH1 PE=1 SV=4
P39692	MET10 (P39692)	2.30339e-06	3.7222e-06	267256	598740	2.24033	Sulfite reductase [NADPH] flavoprotein component OS=Saccharomyces cerevisiae (strain ATCC 204508 / S288c) GN=MET10 PE=1 SV=2
P10849	MTF2 (P10849)	0.000312395	0.000212394	160386	358439	2.23486	Mitochondrial transcription factor 2 OS=Saccharomyces cerevisiae (strain ATCC 204508 / S288c) GN=MTF2 PE=1 SV=1
P40471	AYR1 (P40471)	1.22648e-09	1.8234e-08	5.09684e+06	1.13792e+07	2.2326	NADPH-dependent 1-acyldihydroxyacetone phosphate reductase OS=Saccharomyces cerevisiae (strain ATCC 204508 / S288c) GN=AYR1 PE=1 SV=1
P38234	RFS1 (P38234)	6.50839e-08	2.74367e-07	5.89648e+06	1.31617e+07	2.23213	Protein RFS1 OS=Saccharomyces cerevisiae (strain ATCC 204508 / S288c) GN=RFS1 PE=1 SV=1
Q3E824	YOR020W-A (Q3E824)	2.59469e-06	4.06528e-06	440613	982265	2.22932	Uncharacterized protein YOR020W-A OS=Saccharomyces cerevisiae (strain ATCC 204508 / S288c) GN=YOR020W-A PE=4 SV=1
O74700	TIM9 (O74700)	7.33872e-10	1.3638e-08	2.92986e+06	6.51087e+06	2.22225	Mitochondrial import inner membrane translocase subunit TIM9 OS=Saccharomyces cerevisiae (strain ATCC 204508 / S288c) GN=TIM9 PE=1 SV=1
Q02883	FMP30 (Q02883)	1.69794e-06	2.94284e-06	96050.8	213405	2.22179	N-acyl-phosphatidylethanolamine-hydrolyzing phospholipase D, mitochondrial OS=Saccharomyces cerevisiae (strain ATCC 204508 / S288c) GN=FMP30 PE=1 SV=1
P40098	FMP10 (P40098)	2.01953e-05	2.14458e-05	379845	839144	2.20918	Uncharacterized mitochondrial membrane protein FMP10 OS=Saccharomyces cerevisiae (strain ATCC 204508 / S288c) GN=FMP10 PE=1 SV=1
Q02888	AIM43 (Q02888)	5.72108e-05	5.16527e-05	96597.7	212886	2.20384	Inner membrane assembly complex subunit 17 OS=Saccharomyces cerevisiae (strain ATCC 204508 / S288c) GN=INA17 PE=1 SV=1
P32453	ATP11 (P32453)	4.43915e-09	4.12478e-08	712408	1.56098e+06	2.19113	Protein ATP11, mitochondrial OS=Saccharomyces cerevisiae (strain ATCC 204508 / S288c) GN=ATP11 PE=1 SV=1
P38266	AIM3 (P38266)	0.000941878	0.000549638	175714	384627	2.18894	Altered inheritance of mitochondria protein 3 OS=Saccharomyces cerevisiae (strain ATCC 204508 / S288c) GN=AIM3 PE=1 SV=3
P38858	SOL3 (P38858)	1.62487e-05	1.79679e-05	2.17093e+06	4.74275e+06	2.18466	6-phosphogluconolactonase 3 OS=Saccharomyces cerevisiae (strain ATCC 204508 / S288c) GN=SOL3 PE=1 SV=2
Q01163	RSM23 (Q01163)	6.64925e-08	2.74594e-07	588438	1.28335e+06	2.18095	37S ribosomal protein S23, mitochondrial OS=Saccharomyces cerevisiae (strain ATCC 204508 / S288c) GN=RSM23 PE=1 SV=3
P11412	ZWF1 (P11412)	2.62105e-09	2.97206e-08	7.42527e+06	1.61282e+07	2.17207	Glucose-6-phosphate 1-dehydrogenase OS=Saccharomyces cerevisiae (strain ATCC 204508 / S288c) GN=ZWF1 PE=1 SV=4
P23369	MRPL25 (P23369)	0.000236001	0.0001669	452933	982359	2.16888	54S ribosomal protein L25, mitochondrial OS=Saccharomyces cerevisiae (strain ATCC 204508 / S288c) GN=MRPL25 PE=1 SV=2
Q08818	MSC6 (Q08818)	8.06905e-08	3.11781e-07	391985	846417	2.15931	Meiotic sister-chromatid recombination protein 6, mitochondrial OS=Saccharomyces cerevisiae (strain ATCC 204508 / S288c) GN=MSC6 PE=1 SV=1
P25039	MEF1 (P25039)	0.000237689	0.000167916	1.1429e+06	2.46369e+06	2.15564	Elongation factor G, mitochondrial OS=Saccharomyces cerevisiae (strain ATCC 204508 / S288c) GN=MEF1 PE=1 SV=2
P22135	ATP12 (P22135)	9.40628e-08	3.45764e-07	232270	497604	2.14235	Protein ATP12, mitochondrial OS=Saccharomyces cerevisiae (strain ATCC 204508 / S288c) GN=ATP12 PE=1 SV=2
Q03446	RCR2 (Q03446)	4.1389e-06	5.82941e-06	603498	1.29271e+06	2.14203	Protein RCR2 OS=Saccharomyces cerevisiae (strain ATCC 204508 / S288c) GN=RCR2 PE=1 SV=1
P00812	CAR1 (P00812)	2.8458e-09	3.05433e-08	1.03668e+07	2.21854e+07	2.14005	Arginase OS=Saccharomyces cerevisiae (strain ATCC 204508 / S288c) GN=CAR1 PE=1 SV=1
P22353	MRPL8 (P22353)	6.47011e-08	2.74367e-07	1.47883e+06	3.16065e+06	2.13727	54S ribosomal protein L8, mitochondrial OS=Saccharomyces cerevisiae (strain ATCC 204508 / S288c) GN=MRPL8 PE=1 SV=4
P40340	YTA7 (P40340)	0.00718517	0.00308336	128713	274113	2.12964	Tat-binding homolog 7 OS=Saccharomyces cerevisiae (strain ATCC 204508 / S288c) GN=YTA7 PE=1 SV=2
P28817	EHD3 (P28817)	1.90168e-05	2.05865e-05	700550	1.48346e+06	2.11757	3-hydroxyisobutyryl-CoA hydrolase, mitochondrial OS=Saccharomyces cerevisiae (strain ATCC 204508 / S288c) GN=EHD3 PE=1 SV=2
Q07551	YDL124W (Q07551)	1.05647e-07	3.75203e-07	1.14698e+07	2.42758e+07	2.11649	NADPH-dependent alpha-keto amide reductase OS=Saccharomyces cerevisiae (strain ATCC 204508 / S288c) GN=YDL124W PE=1 SV=1
P31334	MRPL9 (P31334)	0.000321249	0.00021775	208076	439707	2.1132	54S ribosomal protein L9, mitochondrial OS=Saccharomyces cerevisiae (strain ATCC 204508 / S288c) GN=MRPL9 PE=1 SV=3
P38314	SDS24 (P38314)	3.38495e-07	8.51343e-07	1.21746e+06	2.5565e+06	2.09987	Protein SDS24 OS=Saccharomyces cerevisiae (strain ATCC 204508 / S288c) GN=SDS24 PE=1 SV=1
P28737	MSP1 (P28737)	6.01396e-05	5.39669e-05	54718.1	114760	2.09729	Protein MSP1 OS=Saccharomyces cerevisiae (strain ATCC 204508 / S288c) GN=MSP1 PE=1 SV=2
Q06485	ATG33 (Q06485)	4.09116e-07	9.81016e-07	2.43136e+06	5.08397e+06	2.091	Autophagy-related protein 33 OS=Saccharomyces cerevisiae (strain ATCC 204508 / S288c) GN=ATG33 PE=1 SV=1
Q03674	PLB2 (Q03674)	4.98801e-05	4.55257e-05	487498	1.01552e+06	2.08312	Lysophospholipase 2 OS=Saccharomyces cerevisiae (strain ATCC 204508 / S288c) GN=PLB2 PE=1 SV=1
P47771	ALD2 (P47771)	8.61757e-06	1.0447e-05	802687	1.66742e+06	2.0773	Aldehyde dehydrogenase [NAD(P)+] 1 OS=Saccharomyces cerevisiae (strain ATCC 204508 / S288c) GN=ALD2 PE=1 SV=2
P36147	PAM17 (P36147)	7.22616e-09	5.55676e-08	2.83687e+06	5.89188e+06	2.07689	Presequence translocated-associated motor subunit PAM17, mitochondrial OS=Saccharomyces cerevisiae (strain ATCC 204508 / S288c) GN=PAM17 PE=1 SV=1
P28241	IDH2 (P28241)	1.63101e-06	2.86395e-06	2.08869e+07	4.33749e+07	2.07666	Isocitrate dehydrogenase [NAD] subunit 2, mitochondrial OS=Saccharomyces cerevisiae (strain ATCC 204508 / S288c) GN=IDH2 PE=1 SV=1
P50945	AIM37 (P50945)	0.000456868	0.000294177	536987	1.11318e+06	2.07301	MICOS complex subunit MIC27 OS=Saccharomyces cerevisiae (strain ATCC 204508 / S288c) GN=MIC27 PE=1 SV=1
Q04432	HSP31 (Q04432)	2.63237e-06	4.11468e-06	886594	1.83716e+06	2.07215	Probable chaperone protein HSP31 OS=Saccharomyces cerevisiae (strain ATCC 204508 / S288c) GN=HSP31 PE=1 SV=1
Q12034	SLF1 (Q12034)	1.334e-06	2.45857e-06	292294	605259	2.07072	Protein SLF1 OS=Saccharomyces cerevisiae (strain ATCC 204508 / S288c) GN=SLF1 PE=1 SV=1
Q07589	YDL144C (Q07589)	8.10896e-08	3.11781e-07	417401	860431	2.0614	Uncharacterized protein YDL144C OS=Saccharomyces cerevisiae (strain ATCC 204508 / S288c) GN=YDL144C PE=1 SV=2
Q00764	TPS1 (Q00764)	5.5643e-07	1.22052e-06	5.62799e+06	1.15509e+07	2.05241	Alpha,alpha-trehalose-phosphate synthase [UDP-forming] 56 kDa subunit OS=Saccharomyces cerevisiae (strain ATCC 204508 / S288c) GN=TPS1 PE=1 SV=2
P39011	BEM4 (P39011)	0.0103542	0.00427595	39483	80450.5	2.0376	Bud emergence protein 4 OS=Saccharomyces cerevisiae (strain ATCC 204508 / S288c) GN=BEM4 PE=1 SV=1
Q12753	HAA1 (Q12753)	0.00205205	0.00106352	133161	270449	2.031	Transcriptional activator HAA1 OS=Saccharomyces cerevisiae (strain ATCC 204508 / S288c) GN=HAA1 PE=1 SV=1
Q03246	MRPS17 (Q03246)	4.88456e-09	4.3571e-08	651875	1.32185e+06	2.02777	37S ribosomal protein S17, mitochondrial OS=Saccharomyces cerevisiae (strain ATCC 204508 / S288c) GN=MRPS17 PE=1 SV=1
P08536	MET3 (P08536)	0.000414453	0.000269984	542442	1.09953e+06	2.027	Sulfate adenylyltransferase OS=Saccharomyces cerevisiae (strain ATCC 204508 / S288c) GN=MET3 PE=1 SV=2
Q99312	ISN1 (Q99312)	1.80582e-06	3.08192e-06	360255	728353	2.02177	IMP-specific 5'-nucleotidase 1 OS=Saccharomyces cerevisiae (strain ATCC 204508 / S288c) GN=ISN1 PE=1 SV=1
Q02933	RNY1 (Q02933)	0.000180434	0.000133976	215693	433808	2.01123	Ribonuclease T2-like OS=Saccharomyces cerevisiae (strain ATCC 204508 / S288c) GN=RNY1 PE=1 SV=1
P21560	CBP3 (P21560)	4.97882e-06	6.71549e-06	948407	1.90539e+06	2.00904	Protein CBP3, mitochondrial OS=Saccharomyces cerevisiae (strain ATCC 204508 / S288c) GN=CBP3 PE=1 SV=1
P39006	PSD1 (P39006)	0.000100108	8.22767e-05	542602	1.0882e+06	2.00553	Phosphatidylserine decarboxylase proenzyme 1, mitochondrial OS=Saccharomyces cerevisiae (strain ATCC 204508 / S288c) GN=PSD1 PE=1 SV=1
P38962	TVP23 (P38962)	0.00202122	0.00104904	916250	1.82604e+06	1.99295	Golgi apparatus membrane protein TVP23 OS=Saccharomyces cerevisiae (strain ATCC 204508 / S288c) GN=TVP23 PE=1 SV=1
P32843	YME2 (P32843)	4.70698e-05	4.34394e-05	477060	947507	1.98614	Mitochondrial escape protein 2 OS=Saccharomyces cerevisiae (strain ATCC 204508 / S288c) GN=YME2 PE=1 SV=1
P39678	MBP1 (P39678)	0.00867298	0.00363782	84011.8	166605	1.98312	Transcription factor MBP1 OS=Saccharomyces cerevisiae (strain ATCC 204508 / S288c) GN=MBP1 PE=1 SV=1
P30952	MLS1 (P30952)	0.0124906	0.00500679	4.55114e+06	8.97131e+06	1.97122	Malate synthase 1, glyoxysomal OS=Saccharomyces cerevisiae (strain ATCC 204508 / S288c) GN=MLS1 PE=1 SV=1
Q02799	LEE1 (Q02799)	0.000522002	0.000331963	86195.3	169823	1.97022	Zinc finger protein LEE1 OS=Saccharomyces cerevisiae (strain ATCC 204508 / S288c) GN=LEE1 PE=1 SV=1
Q03629	YML079W (Q03629)	4.52717e-06	6.2448e-06	1.56625e+06	3.07926e+06	1.96601	Uncharacterized protein YML079W OS=Saccharomyces cerevisiae (strain ATCC 204508 / S288c) GN=YML079W PE=1 SV=1
Q04869	YMR315W (Q04869)	1.15407e-09	1.8234e-08	5.76625e+06	1.13187e+07	1.96291	Uncharacterized protein YMR315W OS=Saccharomyces cerevisiae (strain ATCC 204508 / S288c) GN=YMR315W PE=1 SV=1
P40582	GTT1 (P40582)	1.52061e-08	9.78175e-08	1.96628e+06	3.85424e+06	1.96016	Glutathione S-transferase 1 OS=Saccharomyces cerevisiae (strain ATCC 204508 / S288c) GN=GTT1 PE=1 SV=1
Q08742	RDL2 (Q08742)	7.41768e-07	1.55564e-06	2.54727e+06	4.98398e+06	1.9566	Thiosulfate sulfurtransferase RDL2, mitochondrial OS=Saccharomyces cerevisiae (strain ATCC 204508 / S288c) GN=RDL2 PE=1 SV=1
P38167	ECM21 (P38167)	1.62803e-05	1.79731e-05	204112	398563	1.95266	Protein ECM21 OS=Saccharomyces cerevisiae (strain ATCC 204508 / S288c) GN=ECM21 PE=1 SV=2
Q03233	ADD37 (Q03233)	0.000134422	0.000104691	330929	645788	1.95144	Alpha1-proteinase inhibitor-degradation deficient protein 37 OS=Saccharomyces cerevisiae (strain ATCC 204508 / S288c) GN=ADD37 PE=1 SV=1
P47137	YJR096W (P47137)	4.69824e-07	1.08013e-06	286379	558028	1.94856	Uncharacterized oxidoreductase YJR096W OS=Saccharomyces cerevisiae (strain ATCC 204508 / S288c) GN=YJR096W PE=1 SV=1
P34250	YKL105C (P34250)	3.27496e-05	3.20319e-05	64758.8	126177	1.94841	Eisosome protein SEG2 OS=Saccharomyces cerevisiae (strain ATCC 204508 / S288c) GN=SEG2 PE=1 SV=1
P25372	TRX3 (P25372)	2.73896e-06	4.2515e-06	613214	1.19318e+06	1.94578	Thioredoxin-3, mitochondrial OS=Saccharomyces cerevisiae (strain ATCC 204508 / S288c) GN=TRX3 PE=1 SV=1
P32378	COQ2 (P32378)	0.00161148	0.000867336	249364	484345	1.94232	4-hydroxybenzoate polyprenyltransferase, mitochondrial OS=Saccharomyces cerevisiae (strain ATCC 204508 / S288c) GN=COQ2 PE=3 SV=1
P50896	PSP1 (P50896)	0.000221226	0.000158122	1.03186e+06	2.00258e+06	1.94076	Protein PSP1 OS=Saccharomyces cerevisiae (strain ATCC 204508 / S288c) GN=PSP1 PE=1 SV=2
P39980	SIT1 (P39980)	0.000638676	0.000394899	604275	1.16846e+06	1.93366	Siderophore iron transporter 1 OS=Saccharomyces cerevisiae (strain ATCC 204508 / S288c) GN=SIT1 PE=3 SV=1
P36523	MRPL15 (P36523)	1.32843e-06	2.45507e-06	958685	1.85117e+06	1.93094	54S ribosomal protein L15, mitochondrial OS=Saccharomyces cerevisiae (strain ATCC 204508 / S288c) GN=MRPL15 PE=1 SV=3
P38910	HSP10 (P38910)	0.000382799	0.000253528	2.47442e+07	4.76837e+07	1.92706	10 kDa heat shock protein, mitochondrial OS=Saccharomyces cerevisiae (strain ATCC 204508 / S288c) GN=HSP10 PE=1 SV=1
P36775	PIM1 (P36775)	3.70625e-07	9.14953e-07	2.01948e+06	3.86793e+06	1.91531	Lon protease homolog, mitochondrial OS=Saccharomyces cerevisiae (strain ATCC 204508 / S288c) GN=PIM1 PE=1 SV=2
P38230	ZTA1 (P38230)	8.1153e-05	6.90741e-05	1.09963e+06	2.10583e+06	1.91503	Probable quinone oxidoreductase OS=Saccharomyces cerevisiae (strain ATCC 204508 / S288c) GN=ZTA1 PE=1 SV=1
P00729	PRC1 (P00729)	0.000532265	0.000337208	8.4537e+06	1.6144e+07	1.9097	Carboxypeptidase Y OS=Saccharomyces cerevisiae (strain ATCC 204508 / S288c) GN=PRC1 PE=1 SV=1
Q99321	DDP1 (Q99321)	3.0067e-07	7.85747e-07	450545	859657	1.90804	Diphosphoinositol polyphosphate phosphohydrolase DDP1 OS=Saccharomyces cerevisiae (strain ATCC 204508 / S288c) GN=DDP1 PE=1 SV=3
P09201	FBP1 (P09201)	0.000352109	0.000236037	98663.3	187912	1.90458	Fructose-1,6-bisphosphatase OS=Saccharomyces cerevisiae (strain ATCC 204508 / S288c) GN=FBP1 PE=1 SV=2
P38081	YBR056W (P38081)	3.79232e-06	5.44443e-06	1.41922e+06	2.70248e+06	1.9042	Uncharacterized glycosyl hydrolase YBR056W OS=Saccharomyces cerevisiae (strain ATCC 204508 / S288c) GN=YBR056W PE=1 SV=1
P35996	MRPL38 (P35996)	4.78345e-06	6.53098e-06	268262	510092	1.90147	54S ribosomal protein L38, mitochondrial OS=Saccharomyces cerevisiae (strain ATCC 204508 / S288c) GN=MRPL38 PE=1 SV=1
P40086	COX15 (P40086)	0.000223053	0.000159258	973693	1.85105e+06	1.90106	Cytochrome c oxidase assembly protein COX15 OS=Saccharomyces cerevisiae (strain ATCC 204508 / S288c) GN=COX15 PE=1 SV=1
P25373	GRX1 (P25373)	1.93683e-06	3.23133e-06	8.58726e+06	1.62515e+07	1.89252	Glutaredoxin-1 OS=Saccharomyces cerevisiae (strain ATCC 204508 / S288c) GN=GRX1 PE=1 SV=1
P17649	UGA1 (P17649)	1.16042e-06	2.21945e-06	1.45173e+06	2.74427e+06	1.89034	4-aminobutyrate aminotransferase OS=Saccharomyces cerevisiae (strain ATCC 204508 / S288c) GN=UGA1 PE=1 SV=2
P10507	MAS1 (P10507)	8.16982e-09	6.01706e-08	973221	1.83707e+06	1.88762	Mitochondrial-processing peptidase subunit beta OS=Saccharomyces cerevisiae (strain ATCC 204508 / S288c) GN=MAS1 PE=1 SV=1
P48365	GYP7 (P48365)	0.000233413	0.00016542	116233	218983	1.88399	GTPase-activating protein GYP7 OS=Saccharomyces cerevisiae (strain ATCC 204508 / S288c) GN=GYP7 PE=1 SV=1
Q08923	CTI6 (Q08923)	0.00670309	0.00290443	143258	269607	1.88196	Histone deacetylase complex subunit CTI6 OS=Saccharomyces cerevisiae (strain ATCC 204508 / S288c) GN=CTI6 PE=1 SV=1
P33314	BUD2 (P33314)	0.0010957	0.000624394	92816.7	174668	1.88186	Inhibitory regulator protein BUD2/CLA2 OS=Saccharomyces cerevisiae (strain ATCC 204508 / S288c) GN=BUD2 PE=1 SV=2
P09232	PRB1 (P09232)	0.000101832	8.34889e-05	7.27272e+06	1.36811e+07	1.88116	Cerevisin OS=Saccharomyces cerevisiae (strain ATCC 204508 / S288c) GN=PRB1 PE=1 SV=1
P17106	CBF1 (P17106)	4.11953e-05	3.87624e-05	2.46321e+06	4.61275e+06	1.87266	Centromere-binding protein 1 OS=Saccharomyces cerevisiae (strain ATCC 204508 / S288c) GN=CBF1 PE=1 SV=2
P32831	NGR1 (P32831)	4.58253e-06	6.30454e-06	973829	1.81535e+06	1.86413	Negative growth regulatory protein NGR1 OS=Saccharomyces cerevisiae (strain ATCC 204508 / S288c) GN=NGR1 PE=1 SV=2
P47160	ENT3 (P47160)	1.03793e-06	2.02615e-06	3.46459e+06	6.45507e+06	1.86316	Epsin-3 OS=Saccharomyces cerevisiae (strain ATCC 204508 / S288c) GN=ENT3 PE=1 SV=1
Q06449	PIN3 (Q06449)	6.13792e-06	7.87089e-06	2.51839e+06	4.6913e+06	1.86282	[PSI+] inducibility protein 3 OS=Saccharomyces cerevisiae (strain ATCC 204508 / S288c) GN=PIN3 PE=1 SV=1
Q12480	AIM45 (Q12480)	5.36416e-07	1.18438e-06	5.51483e+06	1.02642e+07	1.86119	Probable electron transfer flavoprotein subunit alpha, mitochondrial OS=Saccharomyces cerevisiae (strain ATCC 204508 / S288c) GN=AIM45 PE=1 SV=1
Q12044	RCN2 (Q12044)	0.00318159	0.00153462	1.13746e+06	2.11239e+06	1.85711	Regulator of calcineurin 2 OS=Saccharomyces cerevisiae (strain ATCC 204508 / S288c) GN=RCN2 PE=1 SV=1
P54861	DNM1 (P54861)	1.95859e-07	5.747e-07	2.62692e+06	4.86581e+06	1.85229	Dynamin-related protein DNM1 OS=Saccharomyces cerevisiae (strain ATCC 204508 / S288c) GN=DNM1 PE=1 SV=1
P40515	FIS1 (P40515)	3.97227e-06	5.6663e-06	1.01753e+06	1.87748e+06	1.84514	Mitochondria fission 1 protein OS=Saccharomyces cerevisiae (strain ATCC 204508 / S288c) GN=FIS1 PE=1 SV=1
Q12344	GYP5 (Q12344)	0.000112867	9.06475e-05	634719	1.16826e+06	1.84059	GTPase-activating protein GYP5 OS=Saccharomyces cerevisiae (strain ATCC 204508 / S288c) GN=GYP5 PE=1 SV=1
Q06497	ANT1 (Q06497)	0.0393451	0.0132653	262310	482656	1.84002	Peroxisomal adenine nucleotide transporter 1 OS=Saccharomyces cerevisiae (strain ATCC 204508 / S288c) GN=ANT1 PE=1 SV=1
P38759	VPS29 (P38759)	4.50033e-07	1.06013e-06	632241	1.1601e+06	1.8349	Vacuolar protein sorting-associated protein 29 OS=Saccharomyces cerevisiae (strain ATCC 204508 / S288c) GN=VPS29 PE=1 SV=1
P01120	RAS2 (P01120)	1.70808e-06	2.94516e-06	4.83724e+06	8.85724e+06	1.83105	Ras-like protein 2 OS=Saccharomyces cerevisiae (strain ATCC 204508 / S288c) GN=RAS2 PE=1 SV=4
Q04228	UBX2 (Q04228)	0.00138178	0.000760845	153933	281769	1.83046	UBX domain-containing protein 2 OS=Saccharomyces cerevisiae (strain ATCC 204508 / S288c) GN=UBX2 PE=1 SV=1
P36059	YKL151C (P36059)	2.56267e-07	7.10737e-07	244951	447579	1.82722	ATP-dependent (S)-NAD(P)H-hydrate dehydratase OS=Saccharomyces cerevisiae (strain ATCC 204508 / S288c) GN=YKL151C PE=1 SV=1
P08679	CIT2 (P08679)	0.0106176	0.00436322	249967	456518	1.82632	Citrate synthase, peroxisomal OS=Saccharomyces cerevisiae (strain ATCC 204508 / S288c) GN=CIT2 PE=1 SV=1
P39523	YMR124W (P39523)	4.38451e-07	1.0365e-06	142555	260230	1.82547	Uncharacterized protein YMR124W OS=Saccharomyces cerevisiae (strain ATCC 204508 / S288c) GN=YMR124W PE=1 SV=2
P47165	XPT1 (P47165)	8.80273e-07	1.78458e-06	3.30428e+06	6.02906e+06	1.82462	Xanthine phosphoribosyltransferase 1 OS=Saccharomyces cerevisiae (strain ATCC 204508 / S288c) GN=XPT1 PE=1 SV=1
P49017	COQ5 (P49017)	1.64257e-07	4.97237e-07	1.68953e+06	3.0697e+06	1.8169	2-methoxy-6-polyprenyl-1,4-benzoquinol methylase, mitochondrial OS=Saccharomyces cerevisiae (strain ATCC 204508 / S288c) GN=COQ5 PE=1 SV=1
P41910	MAF1 (P41910)	5.41088e-06	7.11186e-06	314496	569918	1.81216	Repressor of RNA polymerase III transcription MAF1 OS=Saccharomyces cerevisiae (strain ATCC 204508 / S288c) GN=MAF1 PE=1 SV=1
P14747	CMP2 (P14747)	1.56776e-05	1.74517e-05	514885	929203	1.80468	Serine/threonine-protein phosphatase 2B catalytic subunit A2 OS=Saccharomyces cerevisiae (strain ATCC 204508 / S288c) GN=CMP2 PE=1 SV=2
P37304	PAM1 (P37304)	7.18035e-08	2.84245e-07	834951	1.49875e+06	1.79501	Protein PAM1 OS=Saccharomyces cerevisiae (strain ATCC 204508 / S288c) GN=PAM1 PE=1 SV=2
P40341	YTA12 (P40341)	0.00117695	0.000662997	1.17683e+06	2.11098e+06	1.79379	Mitochondrial respiratory chain complexes assembly protein YTA12 OS=Saccharomyces cerevisiae (strain ATCC 204508 / S288c) GN=YTA12 PE=1 SV=2
O43137	YBR085C-A (O43137)	0.000288397	0.000198091	2.64548e+06	4.74499e+06	1.79362	Uncharacterized protein YBR085C-A OS=Saccharomyces cerevisiae (strain ATCC 204508 / S288c) GN=YBR085C-A PE=1 SV=1
P50101	UBP15 (P50101)	0.000420126	0.000272883	908926	1.63026e+06	1.79361	Ubiquitin carboxyl-terminal hydrolase 15 OS=Saccharomyces cerevisiae (strain ATCC 204508 / S288c) GN=UBP15 PE=1 SV=1
P31787	ACB1 (P31787)	6.82227e-05	5.98188e-05	3.43414e+07	6.15216e+07	1.79147	Acyl-CoA-binding protein OS=Saccharomyces cerevisiae (strain ATCC 204508 / S288c) GN=ACB1 PE=1 SV=3
P36046	MIA40 (P36046)	3.25634e-07	8.30031e-07	4.36202e+06	7.80744e+06	1.78987	Mitochondrial intermembrane space import and assembly protein 40 OS=Saccharomyces cerevisiae (strain ATCC 204508 / S288c) GN=MIA40 PE=1 SV=2
P36973	APT2 (P36973)	0.00152273	0.000826088	552993	988279	1.78714	Adenine phosphoribosyltransferase 2 OS=Saccharomyces cerevisiae (strain ATCC 204508 / S288c) GN=APT2 PE=1 SV=2
Q04410	GRH1 (Q04410)	0.000201765	0.000146868	3.38718e+06	6.04649e+06	1.78511	GRASP65 homolog protein 1 OS=Saccharomyces cerevisiae (strain ATCC 204508 / S288c) GN=GRH1 PE=1 SV=1
P40210	SIP5 (P40210)	0.0015709	0.000848225	412945	735775	1.78178	Protein SIP5 OS=Saccharomyces cerevisiae (strain ATCC 204508 / S288c) GN=SIP5 PE=1 SV=1
P37262	SOL2 (P37262)	1.17043e-06	2.21945e-06	2.45635e+06	4.37508e+06	1.78113	6-phosphogluconolactonase-like protein 2 OS=Saccharomyces cerevisiae (strain ATCC 204508 / S288c) GN=SOL2 PE=1 SV=2
Q02959	HOS3 (Q02959)	0.000400345	0.000262583	257061	456252	1.77488	Histone deacetylase HOS3 OS=Saccharomyces cerevisiae (strain ATCC 204508 / S288c) GN=HOS3 PE=1 SV=1
P11914	MAS2 (P11914)	3.3384e-07	8.42803e-07	1.32886e+06	2.35678e+06	1.77354	Mitochondrial-processing peptidase subunit alpha OS=Saccharomyces cerevisiae (strain ATCC 204508 / S288c) GN=MAS2 PE=1 SV=1
P40961	PHB1 (P40961)	4.4732e-10	1.03194e-08	6.12217e+06	1.08522e+07	1.7726	Prohibitin-1 OS=Saccharomyces cerevisiae (strain ATCC 204508 / S288c) GN=PHB1 PE=1 SV=2
P27472	GSY2 (P27472)	3.08149e-07	8.0216e-07	9.69935e+06	1.71863e+07	1.7719	Glycogen [starch] synthase isoform 2 OS=Saccharomyces cerevisiae (strain ATCC 204508 / S288c) GN=GSY2 PE=1 SV=3
P10834	PET54 (P10834)	0.000734051	0.000444424	201160	356233	1.77089	Protein PET54 OS=Saccharomyces cerevisiae (strain ATCC 204508 / S288c) GN=PET54 PE=1 SV=1
P40580	IRC24 (P40580)	0.0306384	0.0107768	1.24827e+06	2.20954e+06	1.77008	Benzil reductase ((S)-benzoin forming) IRC24 OS=Saccharomyces cerevisiae (strain ATCC 204508 / S288c) GN=IRC24 PE=1 SV=1
P25270	MRM1 (P25270)	0.00549926	0.00245927	488738	864999	1.76986	rRNA methyltransferase 1, mitochondrial OS=Saccharomyces cerevisiae (strain ATCC 204508 / S288c) GN=MRM1 PE=1 SV=2
P00431	CCP1 (P00431)	5.06004e-06	6.75693e-06	3.7823e+06	6.65692e+06	1.76002	Cytochrome c peroxidase, mitochondrial OS=Saccharomyces cerevisiae (strain ATCC 204508 / S288c) GN=CCP1 PE=1 SV=2
P57744	TIM8 (P57744)	3.35391e-06	4.96636e-06	1.84605e+06	3.24846e+06	1.75968	Mitochondrial import inner membrane translocase subunit TIM8 OS=Saccharomyces cerevisiae (strain ATCC 204508 / S288c) GN=TIM8 PE=1 SV=1
P42940	CIR1 (P42940)	1.78748e-07	5.33858e-07	3.49058e+06	6.13287e+06	1.75698	Probable electron transfer flavoprotein subunit beta OS=Saccharomyces cerevisiae (strain ATCC 204508 / S288c) GN=CIR1 PE=1 SV=1
P22217	TRX1 (P22217)	2.92828e-06	4.48296e-06	3.02522e+07	5.30698e+07	1.75425	Thioredoxin-1 OS=Saccharomyces cerevisiae (strain ATCC 204508 / S288c) GN=TRX1 PE=1 SV=3
P32445	RIM1 (P32445)	2.41407e-05	2.50394e-05	9.95986e+06	1.74537e+07	1.7524	Single-stranded DNA-binding protein RIM1, mitochondrial OS=Saccharomyces cerevisiae (strain ATCC 204508 / S288c) GN=RIM1 PE=1 SV=1
Q02784	GRX5 (Q02784)	1.43644e-07	4.53301e-07	3.74283e+06	6.54337e+06	1.74824	Monothiol glutaredoxin-5, mitochondrial OS=Saccharomyces cerevisiae (strain ATCC 204508 / S288c) GN=GRX5 PE=1 SV=1
Q03266	ABZ2 (Q03266)	0.000669105	0.000410678	333058	580988	1.7444	Aminodeoxychorismate lyase OS=Saccharomyces cerevisiae (strain ATCC 204508 / S288c) GN=ABZ2 PE=1 SV=1
Q12403	ERP3 (Q12403)	0.00278743	0.00137485	373686	650581	1.74098	Protein ERP3 OS=Saccharomyces cerevisiae (strain ATCC 204508 / S288c) GN=ERP3 PE=1 SV=1
P31688	TPS2 (P31688)	8.85305e-08	3.31224e-07	3.45639e+06	6.01292e+06	1.73965	Trehalose-phosphatase OS=Saccharomyces cerevisiae (strain ATCC 204508 / S288c) GN=TPS2 PE=1 SV=3
P38115	ARA1 (P38115)	0.000901563	0.000529084	9.82589e+06	1.70896e+07	1.73924	D-arabinose dehydrogenase [NAD(P)+] heavy chain OS=Saccharomyces cerevisiae (strain ATCC 204508 / S288c) GN=ARA1 PE=1 SV=1
Q06151	DCS1 (Q06151)	3.7015e-06	5.35554e-06	3.61815e+06	6.29127e+06	1.73881	m7GpppX diphosphatase OS=Saccharomyces cerevisiae (strain ATCC 204508 / S288c) GN=DCS1 PE=1 SV=1
P40060	IES5 (P40060)	0.399308	0.0946303	142907	248437	1.73846	Ino eighty subunit 5 OS=Saccharomyces cerevisiae (strain ATCC 204508 / S288c) GN=IES5 PE=1 SV=1
P32793	YSC84 (P32793)	1.14196e-09	1.8234e-08	1.1673e+06	2.02691e+06	1.73641	Protein YSC84 OS=Saccharomyces cerevisiae (strain ATCC 204508 / S288c) GN=YSC84 PE=1 SV=2
Q12427	STB3 (Q12427)	6.56355e-05	5.79591e-05	809306	1.4025e+06	1.73297	Protein STB3 OS=Saccharomyces cerevisiae (strain ATCC 204508 / S288c) GN=STB3 PE=1 SV=1
P87108	TIM10 (P87108)	0.00496449	0.00225632	6.60466e+06	1.14408e+07	1.73224	Mitochondrial import inner membrane translocase subunit TIM10 OS=Saccharomyces cerevisiae (strain ATCC 204508 / S288c) GN=TIM10 PE=1 SV=1
P31384	CCR4 (P31384)	0.000833908	0.000495905	1.94467e+06	3.36052e+06	1.72807	Glucose-repressible alcohol dehydrogenase transcriptional effector OS=Saccharomyces cerevisiae (strain ATCC 204508 / S288c) GN=CCR4 PE=1 SV=2
P38988	GGC1 (P38988)	7.97619e-08	3.10242e-07	1.94378e+06	3.35649e+06	1.72679	Mitochondrial GTP/GDP carrier protein 1 OS=Saccharomyces cerevisiae (strain ATCC 204508 / S288c) GN=GGC1 PE=1 SV=1
P49334	TOM22 (P49334)	0.000333193	0.000224256	7.64177e+06	1.31841e+07	1.72527	Mitochondrial import receptor subunit TOM22 OS=Saccharomyces cerevisiae (strain ATCC 204508 / S288c) GN=TOM22 PE=1 SV=3
P21375	OSM1 (P21375)	0.00033026	0.000222505	472321	813111	1.72152	Fumarate reductase 2 OS=Saccharomyces cerevisiae (strain ATCC 204508 / S288c) GN=OSM1 PE=1 SV=3
P31374	PSK1 (P31374)	0.000643656	0.000397611	268601	461638	1.71868	Serine/threonine-protein kinase PSK1 OS=Saccharomyces cerevisiae (strain ATCC 204508 / S288c) GN=PSK1 PE=1 SV=2
P20081	FPR1 (P20081)	0.000240552	0.00016958	3.65941e+07	6.2791e+07	1.71588	FK506-binding protein 1 OS=Saccharomyces cerevisiae (strain ATCC 204508 / S288c) GN=FPR1 PE=1 SV=2
P32380	SPC110 (P32380)	0.195641	0.0517132	97600.3	167340	1.71455	Spindle pole body component 110 OS=Saccharomyces cerevisiae (strain ATCC 204508 / S288c) GN=SPC110 PE=1 SV=1
P32317	AFG1 (P32317)	0.0019773	0.00102945	931803	1.59565e+06	1.71243	Protein AFG1 OS=Saccharomyces cerevisiae (strain ATCC 204508 / S288c) GN=AFG1 PE=1 SV=1
P39719	FLC2 (P39719)	5.67484e-06	7.40065e-06	577156	984792	1.70628	Flavin carrier protein 2 OS=Saccharomyces cerevisiae (strain ATCC 204508 / S288c) GN=FLC2 PE=1 SV=2
P25349	YCP4 (P25349)	6.81983e-07	1.44384e-06	1.73293e+07	2.95459e+07	1.70497	Flavoprotein-like protein YCP4 OS=Saccharomyces cerevisiae (strain ATCC 204508 / S288c) GN=YCP4 PE=1 SV=1
Q12230	LSP1 (Q12230)	2.30231e-06	3.7222e-06	1.31374e+07	2.23799e+07	1.70352	Sphingolipid long chain base-responsive protein LSP1 OS=Saccharomyces cerevisiae (strain ATCC 204508 / S288c) GN=LSP1 PE=1 SV=1
P47031	IML2 (P47031)	9.06177e-08	3.36801e-07	428152	727167	1.69839	Mitochondrial outer membrane protein IML2 OS=Saccharomyces cerevisiae (strain ATCC 204508 / S288c) GN=IML2 PE=1 SV=1
Q08822	CIR2 (Q08822)	0.000264002	0.000184171	2.14857e+06	3.64751e+06	1.69764	Probable electron transfer flavoprotein-ubiquinone oxidoreductase, mitochondrial OS=Saccharomyces cerevisiae (strain ATCC 204508 / S288c) GN=CIR2 PE=1 SV=1
Q02647	DYN2 (Q02647)	0.000666428	0.000409787	2.39342e+06	4.06253e+06	1.69737	Dynein light chain 1, cytoplasmic OS=Saccharomyces cerevisiae (strain ATCC 204508 / S288c) GN=DYN2 PE=1 SV=1
P08417	FUM1 (P08417)	1.19809e-08	7.87259e-08	1.61367e+07	2.73434e+07	1.69448	Fumarate hydratase, mitochondrial OS=Saccharomyces cerevisiae (strain ATCC 204508 / S288c) GN=FUM1 PE=1 SV=2
Q04599	MRPL1 (Q04599)	1.07313e-05	1.25513e-05	1.86825e+06	3.16183e+06	1.6924	54S ribosomal protein L1, mitochondrial OS=Saccharomyces cerevisiae (strain ATCC 204508 / S288c) GN=MRPL1 PE=1 SV=1
P53968	CRZ1 (P53968)	0.00041658	0.000271106	289931	489505	1.68835	Transcriptional regulator CRZ1 OS=Saccharomyces cerevisiae (strain ATCC 204508 / S288c) GN=CRZ1 PE=1 SV=1
Q12363	WTM1 (Q12363)	8.22477e-05	6.97397e-05	2.76905e+07	4.67491e+07	1.68827	Transcriptional modulator WTM1 OS=Saccharomyces cerevisiae (strain ATCC 204508 / S288c) GN=WTM1 PE=1 SV=1
P07278	BCY1 (P07278)	6.97473e-05	6.08366e-05	6.59871e+06	1.11375e+07	1.68784	cAMP-dependent protein kinase regulatory subunit OS=Saccharomyces cerevisiae (strain ATCC 204508 / S288c) GN=BCY1 PE=1 SV=4
P40553	DOT5 (P40553)	3.18192e-05	3.13511e-05	1.45293e+06	2.45167e+06	1.6874	Peroxiredoxin DOT5 OS=Saccharomyces cerevisiae (strain ATCC 204508 / S288c) GN=DOT5 PE=1 SV=1
P38821	APE4 (P38821)	2.2803e-06	3.7118e-06	2.46994e+06	4.14159e+06	1.6768	Aspartyl aminopeptidase 4 OS=Saccharomyces cerevisiae (strain ATCC 204508 / S288c) GN=APE4 PE=1 SV=1
P33416	HSP78 (P33416)	3.19758e-06	4.79645e-06	1.68181e+06	2.81774e+06	1.67542	Heat shock protein 78, mitochondrial OS=Saccharomyces cerevisiae (strain ATCC 204508 / S288c) GN=HSP78 PE=1 SV=2
Q06892	POS5 (Q06892)	7.96958e-05	6.80069e-05	547477	915456	1.67214	NADH kinase POS5, mitochondrial OS=Saccharomyces cerevisiae (strain ATCC 204508 / S288c) GN=POS5 PE=1 SV=2
P25573	MGR1 (P25573)	0.00019996	0.000145725	686447	1.14494e+06	1.66792	Mitochondrial inner membrane i-AAA protease supercomplex subunit MGR1 OS=Saccharomyces cerevisiae (strain ATCC 204508 / S288c) GN=MGR1 PE=1 SV=1
P10961	HSF1 (P10961)	0.00428551	0.00198412	203441	339012	1.6664	Heat shock factor protein OS=Saccharomyces cerevisiae (strain ATCC 204508 / S288c) GN=HSF1 PE=1 SV=1
P53193	JAC1 (P53193)	1.10303e-05	1.28338e-05	843389	1.40498e+06	1.66588	J-type co-chaperone JAC1, mitochondrial OS=Saccharomyces cerevisiae (strain ATCC 204508 / S288c) GN=JAC1 PE=1 SV=1
P39102	XDJ1 (P39102)	0.00105673	0.000606318	391173	650898	1.66396	DnaJ protein homolog XDJ1 OS=Saccharomyces cerevisiae (strain ATCC 204508 / S288c) GN=XDJ1 PE=1 SV=2
P80967	TOM5 (P80967)	4.68806e-07	1.08013e-06	5.93844e+06	9.85751e+06	1.65995	Mitochondrial import receptor subunit TOM5 OS=Saccharomyces cerevisiae (strain ATCC 204508 / S288c) GN=TOM5 PE=1 SV=1
Q07653	HBT1 (Q07653)	3.76934e-05	3.59733e-05	91021.7	151049	1.65949	Protein HBT1 OS=Saccharomyces cerevisiae (strain ATCC 204508 / S288c) GN=HBT1 PE=1 SV=1
O13547	CCW14 (O13547)	5.74938e-06	7.45426e-06	5.27894e+07	8.73686e+07	1.65504	Covalently-linked cell wall protein 14 OS=Saccharomyces cerevisiae (strain ATCC 204508 / S288c) GN=CCW14 PE=1 SV=1
Q00816	REG1 (Q00816)	6.12117e-05	5.46746e-05	557237	919043	1.64929	Resistance to glucose repression protein 1 OS=Saccharomyces cerevisiae (strain ATCC 204508 / S288c) GN=REG1 PE=1 SV=1
P19882	HSP60 (P19882)	5.33709e-06	7.02869e-06	6.0954e+07	1.00447e+08	1.64791	Heat shock protein 60, mitochondrial OS=Saccharomyces cerevisiae (strain ATCC 204508 / S288c) GN=HSP60 PE=1 SV=1
Q07418	PEX19 (Q07418)	0.000384331	0.000254073	915434	1.50812e+06	1.64744	Peroxisomal membrane protein import receptor PEX19 OS=Saccharomyces cerevisiae (strain ATCC 204508 / S288c) GN=PEX19 PE=1 SV=2
P33324	YKL091C (P33324)	7.68371e-05	6.59889e-05	481453	791425	1.64383	CRAL-TRIO domain-containing protein YKL091C OS=Saccharomyces cerevisiae (strain ATCC 204508 / S288c) GN=YKL091C PE=1 SV=2
P15442	GCN2 (P15442)	0.00175576	0.000932982	186507	306439	1.64305	Serine/threonine-protein kinase GCN2 OS=Saccharomyces cerevisiae (strain ATCC 204508 / S288c) GN=GCN2 PE=1 SV=3
P32642	GRX4 (P32642)	0.402739	0.0953085	26425	43360.8	1.6409	Monothiol glutaredoxin-4 OS=Saccharomyces cerevisiae (strain ATCC 204508 / S288c) GN=GRX4 PE=1 SV=1
P36062	AVT3 (P36062)	0.000401717	0.000263225	707805	1.16102e+06	1.64031	Vacuolar amino acid transporter 3 OS=Saccharomyces cerevisiae (strain ATCC 204508 / S288c) GN=AVT3 PE=1 SV=1
P29029	CTS1 (P29029)	0.00138677	0.000762965	2.23852e+06	3.65659e+06	1.63349	Endochitinase OS=Saccharomyces cerevisiae (strain ATCC 204508 / S288c) GN=CTS1 PE=1 SV=2
P43558	OTU1 (P43558)	1.56294e-06	2.77354e-06	918922	1.50092e+06	1.63335	Ubiquitin thioesterase OTU1 OS=Saccharomyces cerevisiae (strain ATCC 204508 / S288c) GN=OTU1 PE=1 SV=1
P36006	MYO3 (P36006)	3.26219e-07	8.30031e-07	1.04167e+06	1.70062e+06	1.63259	Myosin-3 OS=Saccharomyces cerevisiae (strain ATCC 204508 / S288c) GN=MYO3 PE=1 SV=4
P52489	PYK2 (P52489)	7.07382e-05	6.14605e-05	1.29796e+06	2.11583e+06	1.63012	Pyruvate kinase 2 OS=Saccharomyces cerevisiae (strain ATCC 204508 / S288c) GN=PYK2 PE=1 SV=1
Q03778	FMN1 (Q03778)	4.47459e-06	6.19783e-06	518733	845548	1.63003	Riboflavin kinase OS=Saccharomyces cerevisiae (strain ATCC 204508 / S288c) GN=FMN1 PE=1 SV=1
Q12449	AHA1 (Q12449)	8.34835e-06	1.02292e-05	5.88451e+06	9.56449e+06	1.62537	Hsp90 co-chaperone AHA1 OS=Saccharomyces cerevisiae (strain ATCC 204508 / S288c) GN=AHA1 PE=1 SV=1
P38616	YGP1 (P38616)	4.83093e-07	1.09558e-06	1.27388e+06	2.06882e+06	1.62404	Protein YGP1 OS=Saccharomyces cerevisiae (strain ATCC 204508 / S288c) GN=YGP1 PE=1 SV=2
Q12451	OSH2 (Q12451)	0.000311209	0.000211803	901921	1.46463e+06	1.6239	Oxysterol-binding protein homolog 2 OS=Saccharomyces cerevisiae (strain ATCC 204508 / S288c) GN=OSH2 PE=1 SV=1
P33310	MDL1 (P33310)	0.00432589	0.00200005	469202	761731	1.62346	ATP-dependent permease MDL1, mitochondrial OS=Saccharomyces cerevisiae (strain ATCC 204508 / S288c) GN=MDL1 PE=1 SV=2
P25719	CPR3 (P25719)	6.0238e-09	4.97529e-08	1.45027e+07	2.35234e+07	1.622	Peptidyl-prolyl cis-trans isomerase C, mitochondrial OS=Saccharomyces cerevisiae (strain ATCC 204508 / S288c) GN=CPR3 PE=1 SV=1
P38715	GRE3 (P38715)	1.18869e-07	4.07871e-07	3.97018e+06	6.43498e+06	1.62083	NADPH-dependent aldose reductase GRE3 OS=Saccharomyces cerevisiae (strain ATCC 204508 / S288c) GN=GRE3 PE=1 SV=1
Q06315	SKG3 (Q06315)	0.021535	0.00800398	334757	542039	1.6192	Protein SKG3 OS=Saccharomyces cerevisiae (strain ATCC 204508 / S288c) GN=SKG3 PE=1 SV=1
Q08686	TUM1 (Q08686)	2.6474e-06	4.12853e-06	3.43096e+06	5.54642e+06	1.61658	Thiosulfate sulfurtransferase TUM1 OS=Saccharomyces cerevisiae (strain ATCC 204508 / S288c) GN=TUM1 PE=1 SV=1
Q03102	YML131W (Q03102)	0.000122178	9.67319e-05	3.88282e+06	6.27403e+06	1.61585	Uncharacterized membrane protein YML131W OS=Saccharomyces cerevisiae (strain ATCC 204508 / S288c) GN=YML131W PE=1 SV=1
P14904	LAP4 (P14904)	0.000164888	0.000123892	5.42069e+06	8.75326e+06	1.61479	Vacuolar aminopeptidase 1 OS=Saccharomyces cerevisiae (strain ATCC 204508 / S288c) GN=APE1 PE=1 SV=2
P36103	YKL023W (P36103)	4.26596e-05	4.00277e-05	167207	269697	1.61295	Uncharacterized protein YKL023W OS=Saccharomyces cerevisiae (strain ATCC 204508 / S288c) GN=YKL023W PE=1 SV=2
P35191	MDJ1 (P35191)	0.000115772	9.23468e-05	1.6913e+06	2.72626e+06	1.61193	DnaJ homolog 1, mitochondrial OS=Saccharomyces cerevisiae (strain ATCC 204508 / S288c) GN=MDJ1 PE=1 SV=1
P38065	APL3 (P38065)	0.00674471	0.00292057	280408	451474	1.61006	AP-2 complex subunit alpha OS=Saccharomyces cerevisiae (strain ATCC 204508 / S288c) GN=APL3 PE=1 SV=1
P32590	SSE2 (P32590)	2.34569e-07	6.56609e-07	1.47386e+06	2.37175e+06	1.60921	Heat shock protein homolog SSE2 OS=Saccharomyces cerevisiae (strain ATCC 204508 / S288c) GN=SSE2 PE=1 SV=3
Q12515	PAR32 (Q12515)	0.000667466	0.000410048	2.05141e+06	3.30055e+06	1.60892	Protein PAR32 OS=Saccharomyces cerevisiae (strain ATCC 204508 / S288c) GN=PAR32 PE=1 SV=1
P40989	GSC2 (P40989)	0.000159957	0.000120918	1.08191e+06	1.73928e+06	1.60759	1,3-beta-glucan synthase component GSC2 OS=Saccharomyces cerevisiae (strain ATCC 204508 / S288c) GN=GSC2 PE=1 SV=2
Q08179	MDM38 (Q08179)	4.93495e-06	6.69682e-06	4.39641e+06	7.03399e+06	1.59994	Mitochondrial distribution and morphology protein 38 OS=Saccharomyces cerevisiae (strain ATCC 204508 / S288c) GN=MDM38 PE=1 SV=1
P32906	MNS1 (P32906)	0.0817558	0.0248956	731735	1.17057e+06	1.59972	Endoplasmic reticulum mannosyl-oligosaccharide 1,2-alpha-mannosidase OS=Saccharomyces cerevisiae (strain ATCC 204508 / S288c) GN=MNS1 PE=1 SV=1
P38084	BAP2 (P38084)	1.195e-05	1.36896e-05	1.30846e+06	2.09219e+06	1.59897	Leu/Val/Ile amino-acid permease OS=Saccharomyces cerevisiae (strain ATCC 204508 / S288c) GN=BAP2 PE=1 SV=2
P32913	VPS17 (P32913)	0.00316528	0.00152896	412158	658982	1.59886	Vacuolar protein sorting-associated protein 17 OS=Saccharomyces cerevisiae (strain ATCC 204508 / S288c) GN=VPS17 PE=1 SV=2
P0CS90		5.01602e-08	2.32098e-07	7.8252e+07	1.25105e+08	1.59874	Heat shock protein SSC1, mitochondrial OS=Saccharomyces cerevisiae (strain ATCC 204508 / S288c) GN=SSC1 PE=1 SV=1
P47116	PTK2 (P47116)	6.07939e-05	5.44468e-05	986931	1.57749e+06	1.59838	Serine/threonine-protein kinase PTK2/STK2 OS=Saccharomyces cerevisiae (strain ATCC 204508 / S288c) GN=PTK2 PE=1 SV=1
P35180	TOM20 (P35180)	5.70704e-06	7.41373e-06	7.41217e+06	1.18429e+07	1.59776	Mitochondrial import receptor subunit TOM20 OS=Saccharomyces cerevisiae (strain ATCC 204508 / S288c) GN=TOM20 PE=1 SV=1
P32787	MGM101 (P32787)	2.99846e-05	2.98957e-05	2.59159e+06	4.13393e+06	1.59513	Mitochondrial genome maintenance protein MGM101 OS=Saccharomyces cerevisiae (strain ATCC 204508 / S288c) GN=MGM101 PE=1 SV=1
Q05892	YLR290C (Q05892)	0.0028915	0.00141718	129942	206790	1.5914	Uncharacterized protein YLR290C, mitochondrial OS=Saccharomyces cerevisiae (strain ATCC 204508 / S288c) GN=YLR290C PE=1 SV=1
P53960	YNL040W (P53960)	0.0470107	0.0154549	1.20902e+06	1.92294e+06	1.5905	Putative alanyl-tRNA editing protein alaX OS=Saccharomyces cerevisiae (strain ATCC 204508 / S288c) GN=YNL040W PE=1 SV=1
P36056	RSM22 (P36056)	0.108832	0.0316701	220159	350083	1.59013	37S ribosomal protein S22, mitochondrial OS=Saccharomyces cerevisiae (strain ATCC 204508 / S288c) GN=RSM22 PE=1 SV=1
Q02554	CUS1 (Q02554)	0.512906	0.116161	157286	250071	1.58991	Cold sensitive U2 snRNA suppressor 1 OS=Saccharomyces cerevisiae (strain ATCC 204508 / S288c) GN=CUS1 PE=1 SV=1
Q01532	LAP3 (Q01532)	3.16476e-05	3.1228e-05	6.47728e+06	1.02888e+07	1.58844	Cysteine proteinase 1, mitochondrial OS=Saccharomyces cerevisiae (strain ATCC 204508 / S288c) GN=LAP3 PE=1 SV=3
P20485	CKI1 (P20485)	1.83493e-05	2.00915e-05	519957	825893	1.58839	Choline kinase OS=Saccharomyces cerevisiae (strain ATCC 204508 / S288c) GN=CKI1 PE=1 SV=1
P52286	SKP1 (P52286)	4.75338e-05	4.36462e-05	4.74645e+06	7.53677e+06	1.58787	Suppressor of kinetochore protein 1 OS=Saccharomyces cerevisiae (strain ATCC 204508 / S288c) GN=SKP1 PE=1 SV=2
P21771	MRPS28 (P21771)	0.000256304	0.000179175	688409	1.09019e+06	1.58364	37S ribosomal protein S28, mitochondrial OS=Saccharomyces cerevisiae (strain ATCC 204508 / S288c) GN=MRPS28 PE=1 SV=1
P15019	TAL1 (P15019)	4.41453e-08	2.14012e-07	4.88654e+07	7.73256e+07	1.58242	Transaldolase OS=Saccharomyces cerevisiae (strain ATCC 204508 / S288c) GN=TAL1 PE=1 SV=4
P10356	YER152C (P10356)	0.000144669	0.000110738	629455	996054	1.58241	Uncharacterized protein YER152C OS=Saccharomyces cerevisiae (strain ATCC 204508 / S288c) GN=YER152C PE=1 SV=2
P15424	MSS116 (P15424)	0.002918	0.00142598	1.75693e+06	2.77879e+06	1.58161	ATP-dependent RNA helicase MSS116, mitochondrial OS=Saccharomyces cerevisiae (strain ATCC 204508 / S288c) GN=MSS116 PE=1 SV=1
Q02260	SMD1 (Q02260)	0.00739989	0.00315728	378230	597914	1.58082	Small nuclear ribonucleoprotein Sm D1 OS=Saccharomyces cerevisiae (strain ATCC 204508 / S288c) GN=SMD1 PE=1 SV=1
P40343	VPS27 (P40343)	0.00727478	0.00311582	522666	826125	1.5806	Vacuolar protein sorting-associated protein 27 OS=Saccharomyces cerevisiae (strain ATCC 204508 / S288c) GN=VPS27 PE=1 SV=3
P00425	COX5B (P00425)	0.000251342	0.000176259	584156	923028	1.5801	Cytochrome c oxidase polypeptide 5B, mitochondrial OS=Saccharomyces cerevisiae (strain ATCC 204508 / S288c) GN=COX5B PE=1 SV=3
P53154	GUP1 (P53154)	3.73718e-05	3.57173e-05	296905	468722	1.57869	Glycerol uptake protein 1 OS=Saccharomyces cerevisiae (strain ATCC 204508 / S288c) GN=GUP1 PE=1 SV=1
P38297	FZO1 (P38297)	0.000155186	0.000117978	482376	761438	1.57852	Mitofusin FZO1 OS=Saccharomyces cerevisiae (strain ATCC 204508 / S288c) GN=FZO1 PE=1 SV=1
P48361	ASK10 (P48361)	5.85749e-06	7.57974e-06	269818	425026	1.57523	Activator of SKN7 protein 10 OS=Saccharomyces cerevisiae (strain ATCC 204508 / S288c) GN=ASK10 PE=1 SV=2
Q06494	YPR127W (Q06494)	0.000156859	0.00011898	990283	1.55917e+06	1.57447	Putative pyridoxal reductase OS=Saccharomyces cerevisiae (strain ATCC 204508 / S288c) GN=YPR127W PE=1 SV=1
P39925	AFG3 (P39925)	2.41908e-05	2.50525e-05	643830	1.01182e+06	1.57157	Mitochondrial respiratory chain complexes assembly protein AFG3 OS=Saccharomyces cerevisiae (strain ATCC 204508 / S288c) GN=AFG3 PE=1 SV=1
P39724	AIM1 (P39724)	0.00249906	0.00126086	585199	918153	1.56896	Altered inheritance of mitochondria protein 1 OS=Saccharomyces cerevisiae (strain ATCC 204508 / S288c) GN=AIM1 PE=1 SV=1
P33311	MDL2 (P33311)	0.000239408	0.000168952	526042	824767	1.56787	ATP-dependent permease MDL2, mitochondrial OS=Saccharomyces cerevisiae (strain ATCC 204508 / S288c) GN=MDL2 PE=1 SV=3
P53551	HHO1 (P53551)	7.68378e-05	6.59889e-05	2.37765e+06	3.72705e+06	1.56754	Histone H1 OS=Saccharomyces cerevisiae (strain ATCC 204508 / S288c) GN=HHO1 PE=1 SV=1
P38736	GOS1 (P38736)	0.000106366	8.65693e-05	1.31611e+06	2.06156e+06	1.56641	Golgi SNAP receptor complex member 1 OS=Saccharomyces cerevisiae (strain ATCC 204508 / S288c) GN=GOS1 PE=1 SV=1
Q07458	RXT3 (Q07458)	0.00521295	0.00234692	80943.7	126360	1.56108	Transcriptional regulatory protein RXT3 OS=Saccharomyces cerevisiae (strain ATCC 204508 / S288c) GN=RXT3 PE=1 SV=1
P38931	SSN2 (P38931)	1.99342e-05	2.1251e-05	12256.5	19130.4	1.56084	Mediator of RNA polymerase II transcription subunit 13 OS=Saccharomyces cerevisiae (strain ATCC 204508 / S288c) GN=SSN2 PE=1 SV=2
P40518	ARC15 (P40518)	0.00275303	0.00136027	2.57694e+06	4.02147e+06	1.56056	Actin-related protein 2/3 complex subunit 5 OS=Saccharomyces cerevisiae (strain ATCC 204508 / S288c) GN=ARC15 PE=1 SV=1
P22211	NPR1 (P22211)	5.37257e-05	4.87034e-05	173334	269640	1.5556	Nitrogen permease reactivator protein OS=Saccharomyces cerevisiae (strain ATCC 204508 / S288c) GN=NPR1 PE=1 SV=2
P32472	FPR2 (P32472)	3.03668e-05	3.02318e-05	1.99162e+06	3.09658e+06	1.5548	Peptidyl-prolyl cis-trans isomerase FPR2 OS=Saccharomyces cerevisiae (strain ATCC 204508 / S288c) GN=FPR2 PE=1 SV=1
P36124	SET3 (P36124)	7.99684e-05	6.81525e-05	120945	187986	1.5543	SET domain-containing protein 3 OS=Saccharomyces cerevisiae (strain ATCC 204508 / S288c) GN=SET3 PE=1 SV=1
Q05812	MSC3 (Q05812)	0.00044286	0.000286259	443965	689954	1.55407	Meiotic sister-chromatid recombination protein 3 OS=Saccharomyces cerevisiae (strain ATCC 204508 / S288c) GN=MSC3 PE=1 SV=1
P12695	LAT1 (P12695)	2.50719e-08	1.34327e-07	1.92766e+07	2.99469e+07	1.55354	Dihydrolipoyllysine-residue acetyltransferase component of pyruvate dehydrogenase complex, mitochondrial OS=Saccharomyces cerevisiae (strain ATCC 204508 / S288c) GN=LAT1 PE=1 SV=1
P53327	SLH1 (P53327)	2.19156e-05	2.30169e-05	401466	623450	1.55293	Antiviral helicase SLH1 OS=Saccharomyces cerevisiae (strain ATCC 204508 / S288c) GN=SLH1 PE=1 SV=2
P41818	GLC8 (P41818)	1.96569e-05	2.11087e-05	3.17506e+06	4.92241e+06	1.55034	Protein GLC8 OS=Saccharomyces cerevisiae (strain ATCC 204508 / S288c) GN=GLC8 PE=1 SV=1
Q12354	YLR118C (Q12354)	0.000880279	0.000519327	1.17287e+06	1.81731e+06	1.54946	Acyl-protein thioesterase 1 OS=Saccharomyces cerevisiae (strain ATCC 204508 / S288c) GN=YLR118C PE=1 SV=1
P38067	UGA2 (P38067)	0.000901396	0.000529084	576072	889345	1.54381	Succinate-semialdehyde dehydrogenase [NADP(+)] OS=Saccharomyces cerevisiae (strain ATCC 204508 / S288c) GN=UGA2 PE=1 SV=2
P18962	DAP2 (P18962)	0.0526432	0.0170883	789008	1.21791e+06	1.5436	Dipeptidyl aminopeptidase B OS=Saccharomyces cerevisiae (strain ATCC 204508 / S288c) GN=DAP2 PE=1 SV=2
Q01852	TIM44 (Q01852)	2.28409e-05	2.38019e-05	3.00785e+06	4.63614e+06	1.54134	Mitochondrial import inner membrane translocase subunit TIM44 OS=Saccharomyces cerevisiae (strain ATCC 204508 / S288c) GN=TIM44 PE=1 SV=1
Q02486	ABF2 (Q02486)	1.9233e-06	3.21677e-06	1.11631e+06	1.71923e+06	1.54011	ARS-binding factor 2, mitochondrial OS=Saccharomyces cerevisiae (strain ATCC 204508 / S288c) GN=ABF2 PE=1 SV=1
P23644	TOM40 (P23644)	1.709e-07	5.12707e-07	1.42677e+07	2.18726e+07	1.53301	Mitochondrial import receptor subunit TOM40 OS=Saccharomyces cerevisiae (strain ATCC 204508 / S288c) GN=TOM40 PE=1 SV=1
P47117	ARP3 (P47117)	0.0379035	0.012861	1.53006e+07	2.34486e+07	1.53253	Actin-related protein 3 OS=Saccharomyces cerevisiae (strain ATCC 204508 / S288c) GN=ARP3 PE=1 SV=1
P39676	YHB1 (P39676)	1.19052e-05	1.3685e-05	6.09401e+07	9.33843e+07	1.53239	Flavohemoprotein OS=Saccharomyces cerevisiae (strain ATCC 204508 / S288c) GN=YHB1 PE=1 SV=2
P50085	PHB2 (P50085)	4.19656e-09	3.95429e-08	2.70092e+06	4.13699e+06	1.5317	Prohibitin-2 OS=Saccharomyces cerevisiae (strain ATCC 204508 / S288c) GN=PHB2 PE=1 SV=2
P32381	ARP2 (P32381)	0.000339279	0.000228122	8.75006e+06	1.33985e+07	1.53124	Actin-related protein 2 OS=Saccharomyces cerevisiae (strain ATCC 204508 / S288c) GN=ARP2 PE=1 SV=1
P32795	YME1 (P32795)	5.03307e-06	6.73436e-06	2.50294e+06	3.83184e+06	1.53094	Mitochondrial inner membrane i-AAA protease supercomplex subunit YME1 OS=Saccharomyces cerevisiae (strain ATCC 204508 / S288c) GN=YME1 PE=1 SV=1
Q04338	VTI1 (Q04338)	3.70665e-06	5.35554e-06	1.68842e+06	2.58476e+06	1.53088	t-SNARE VTI1 OS=Saccharomyces cerevisiae (strain ATCC 204508 / S288c) GN=VTI1 PE=1 SV=3
P42949	PAM16 (P42949)	4.54548e-05	4.24748e-05	1.21562e+06	1.86041e+06	1.53042	Mitochondrial import inner membrane translocase subunit TIM16 OS=Saccharomyces cerevisiae (strain ATCC 204508 / S288c) GN=PAM16 PE=1 SV=1
P09547	SWI1 (P09547)	0.00620497	0.00271848	181133	276929	1.52887	SWI/SNF chromatin-remodeling complex subunit SWI1 OS=Saccharomyces cerevisiae (strain ATCC 204508 / S288c) GN=SWI1 PE=1 SV=1
P32857	PTM1 (P32857)	0.0310012	0.0108701	1.95661e+06	2.99102e+06	1.52868	Membrane protein PTM1 OS=Saccharomyces cerevisiae (strain ATCC 204508 / S288c) GN=PTM1 PE=1 SV=2
P38989	SMC2 (P38989)	0.341339	0.0828891	113461	173336	1.52772	Structural maintenance of chromosomes protein 2 OS=Saccharomyces cerevisiae (strain ATCC 204508 / S288c) GN=SMC2 PE=1 SV=1
P42844	ZIM17 (P42844)	0.000383127	0.000253528	1.10612e+06	1.68966e+06	1.52755	Mitochondrial protein import protein ZIM17 OS=Saccharomyces cerevisiae (strain ATCC 204508 / S288c) GN=ZIM17 PE=1 SV=2
Q08438	VHS3 (Q08438)	0.000791001	0.000473335	285161	434958	1.52531	Phosphopantothenoylcysteine decarboxylase subunit VHS3 OS=Saccharomyces cerevisiae (strain ATCC 204508 / S288c) GN=VHS3 PE=1 SV=1
Q12164	POM33 (Q12164)	0.000266002	0.000185373	685104	1.04441e+06	1.52446	Pore membrane protein of 33 kDa OS=Saccharomyces cerevisiae (strain ATCC 204508 / S288c) GN=POM33 PE=1 SV=1
Q12306	SMT3 (Q12306)	9.95076e-05	8.19848e-05	1.49382e+07	2.27682e+07	1.52416	Ubiquitin-like protein SMT3 OS=Saccharomyces cerevisiae (strain ATCC 204508 / S288c) GN=SMT3 PE=1 SV=1
P38137	PCS60 (P38137)	7.78111e-07	1.61666e-06	3.95309e+06	6.02361e+06	1.52377	Peroxisomal-coenzyme A synthetase OS=Saccharomyces cerevisiae (strain ATCC 204508 / S288c) GN=PCS60 PE=1 SV=1
P47083	MPP10 (P47083)	1.4774e-06	2.65698e-06	4.73505e+06	7.21334e+06	1.52339	U3 small nucleolar RNA-associated protein MPP10 OS=Saccharomyces cerevisiae (strain ATCC 204508 / S288c) GN=MPP10 PE=1 SV=1
P22803	TRX2 (P22803)	0.00157218	0.00084823	4.35932e+07	6.63861e+07	1.52285	Thioredoxin-2 OS=Saccharomyces cerevisiae (strain ATCC 204508 / S288c) GN=TRX2 PE=1 SV=3
Q06608	YPR172W (Q06608)	6.57926e-08	2.74367e-07	2.06524e+06	3.14139e+06	1.52108	Pyridoxamine 5'-phosphate oxidase homolog OS=Saccharomyces cerevisiae (strain ATCC 204508 / S288c) GN=YPR172W PE=1 SV=1
Q07825	FRA1 (Q07825)	6.09977e-06	7.84772e-06	856939	1.30107e+06	1.51828	Putative Xaa-Pro aminopeptidase FRA1 OS=Saccharomyces cerevisiae (strain ATCC 204508 / S288c) GN=FRA1 PE=1 SV=1
P26754	RFA2 (P26754)	0.0702536	0.0219218	3.32699e+06	5.04962e+06	1.51777	Replication factor A protein 2 OS=Saccharomyces cerevisiae (strain ATCC 204508 / S288c) GN=RFA2 PE=1 SV=1
P38066	RIB1 (P38066)	8.19732e-05	6.95951e-05	516685	784169	1.51769	GTP cyclohydrolase-2 OS=Saccharomyces cerevisiae (strain ATCC 204508 / S288c) GN=RIB1 PE=1 SV=2
P34730	BMH2 (P34730)	4.82076e-07	1.09558e-06	5.83776e+07	8.8521e+07	1.51635	Protein BMH2 OS=Saccharomyces cerevisiae (strain ATCC 204508 / S288c) GN=BMH2 PE=1 SV=3
P43587	YPI1 (P43587)	0.00187784	0.000986881	510710	771818	1.51127	Type 1 phosphatases regulator YPI1 OS=Saccharomyces cerevisiae (strain ATCC 204508 / S288c) GN=YPI1 PE=1 SV=1
P07262	GDH1 (P07262)	0.00214846	0.00110574	3.98554e+07	6.02113e+07	1.51074	NADP-specific glutamate dehydrogenase 1 OS=Saccharomyces cerevisiae (strain ATCC 204508 / S288c) GN=GDH1 PE=1 SV=2
Q00772	SLT2 (Q00772)	0.000612968	0.00038041	1.6428e+06	2.48165e+06	1.51062	Mitogen-activated protein kinase SLT2/MPK1 OS=Saccharomyces cerevisiae (strain ATCC 204508 / S288c) GN=SLT2 PE=1 SV=2
P53296	ATF2 (P53296)	0.127792	0.036365	525449	793282	1.50972	Alcohol O-acetyltransferase 2 OS=Saccharomyces cerevisiae (strain ATCC 204508 / S288c) GN=ATF2 PE=1 SV=1
P40957	MAD1 (P40957)	0.100655	0.0295218	214416	323616	1.50929	Spindle assembly checkpoint component MAD1 OS=Saccharomyces cerevisiae (strain ATCC 204508 / S288c) GN=MAD1 PE=1 SV=1
P47039	BNA3 (P47039)	7.61315e-06	9.5024e-06	1.68406e+06	2.54169e+06	1.50927	Probable kynurenine--oxoglutarate transaminase BNA3 OS=Saccharomyces cerevisiae (strain ATCC 204508 / S288c) GN=BNA3 PE=1 SV=1
P40581	HYR1 (P40581)	1.31922e-05	1.49588e-05	6.04944e+06	9.117e+06	1.50708	Peroxiredoxin HYR1 OS=Saccharomyces cerevisiae (strain ATCC 204508 / S288c) GN=HYR1 PE=1 SV=1
P53094	MDS3 (P53094)	0.00260065	0.00130229	292208	440209	1.50649	Negative regulator of sporulation MDS3 OS=Saccharomyces cerevisiae (strain ATCC 204508 / S288c) GN=MDS3 PE=1 SV=2
P32463	ACP1 (P32463)	1.08616e-07	3.80445e-07	7.18404e+06	1.08131e+07	1.50515	Acyl carrier protein, mitochondrial OS=Saccharomyces cerevisiae (strain ATCC 204508 / S288c) GN=ACP1 PE=1 SV=1
P07274	PFY1 (P07274)	0.000115811	9.23468e-05	1.47251e+07	2.21592e+07	1.50486	Profilin OS=Saccharomyces cerevisiae (strain ATCC 204508 / S288c) GN=PFY1 PE=1 SV=2
P53552	THO2 (P53552)	0.232133	0.0598456	344450	517958	1.50372	THO complex subunit 2 OS=Saccharomyces cerevisiae (strain ATCC 204508 / S288c) GN=THO2 PE=1 SV=1
P53078	SDT1 (P53078)	0.0355388	0.012174	269726	405457	1.50322	Suppressor of disruption of TFIIS OS=Saccharomyces cerevisiae (strain ATCC 204508 / S288c) GN=SDT1 PE=1 SV=1
P25371	ADP1 (P25371)	0.000587008	0.00036668	1.19748e+06	1.79896e+06	1.50229	Probable ATP-dependent permease OS=Saccharomyces cerevisiae (strain ATCC 204508 / S288c) GN=ADP1 PE=1 SV=2
Q03667	MIC17 (Q03667)	0.000659957	0.000406555	2.78425e+06	4.18255e+06	1.50222	Mitochondrial intermembrane space cysteine motif-containing protein MIX17 OS=Saccharomyces cerevisiae (strain ATCC 204508 / S288c) GN=MIX17 PE=1 SV=1
P53604	MSO1 (P53604)	0.0567272	0.018237	245025	367862	1.50133	Protein MSO1 OS=Saccharomyces cerevisiae (strain ATCC 204508 / S288c) GN=MSO1 PE=1 SV=1
P34217	PIN4 (P34217)	0.0015365	0.000832339	2.89844e+06	4.34778e+06	1.50004	RNA-binding protein PIN4 OS=Saccharomyces cerevisiae (strain ATCC 204508 / S288c) GN=PIN4 PE=1 SV=1
P38310	FTH1 (P38310)	7.72598e-07	1.61021e-06	584311	875472	1.4983	Iron transporter FTH1 OS=Saccharomyces cerevisiae (strain ATCC 204508 / S288c) GN=FTH1 PE=1 SV=2
Q12191	BUG1 (Q12191)	0.000250827	0.000176082	2.436e+06	3.64656e+06	1.49694	Binder of USO1 and GRH1 protein 1 OS=Saccharomyces cerevisiae (strain ATCC 204508 / S288c) GN=BUG1 PE=1 SV=1
P47068	BBC1 (P47068)	0.000211145	0.000152547	5.84163e+06	8.74428e+06	1.49689	Myosin tail region-interacting protein MTI1 OS=Saccharomyces cerevisiae (strain ATCC 204508 / S288c) GN=BBC1 PE=1 SV=2
P27705	MIG1 (P27705)	0.000999514	0.000575957	557913	834940	1.49654	Regulatory protein MIG1 OS=Saccharomyces cerevisiae (strain ATCC 204508 / S288c) GN=MIG1 PE=1 SV=1
P13185	KIN1 (P13185)	5.74091e-05	5.16923e-05	657929	983969	1.49555	Serine/threonine protein kinase KIN1 OS=Saccharomyces cerevisiae (strain ATCC 204508 / S288c) GN=KIN1 PE=1 SV=3
P53299	TIM13 (P53299)	0.000474916	0.000304042	3.18972e+06	4.7621e+06	1.49296	Mitochondrial import inner membrane translocase subunit TIM13 OS=Saccharomyces cerevisiae (strain ATCC 204508 / S288c) GN=TIM13 PE=1 SV=1
P00445	SOD1 (P00445)	0.000116156	9.25112e-05	1.1313e+08	1.68895e+08	1.49293	Superoxide dismutase [Cu-Zn] OS=Saccharomyces cerevisiae (strain ATCC 204508 / S288c) GN=SOD1 PE=1 SV=2
P07267	PEP4 (P07267)	2.23772e-05	2.34281e-05	2.42535e+07	3.61654e+07	1.49114	Saccharopepsin OS=Saccharomyces cerevisiae (strain ATCC 204508 / S288c) GN=PEP4 PE=1 SV=1
P23776	EXG1 (P23776)	2.49271e-06	3.95177e-06	2.52183e+06	3.75945e+06	1.49076	Glucan 1,3-beta-glucosidase I/II OS=Saccharomyces cerevisiae (strain ATCC 204508 / S288c) GN=EXG1 PE=1 SV=1
P32477	GSH1 (P32477)	0.00107664	0.000616154	1.378e+06	2.05287e+06	1.48974	Glutamate--cysteine ligase OS=Saccharomyces cerevisiae (strain ATCC 204508 / S288c) GN=GSH1 PE=1 SV=1
P47061	VPS53 (P47061)	0.02828	0.0100369	258777	384666	1.48647	Vacuolar protein sorting-associated protein 53 OS=Saccharomyces cerevisiae (strain ATCC 204508 / S288c) GN=VPS53 PE=1 SV=1
P53112	PEX14 (P53112)	0.00346938	0.00165199	526072	781265	1.48509	Peroxisomal membrane protein PEX14 OS=Saccharomyces cerevisiae (strain ATCC 204508 / S288c) GN=PEX14 PE=1 SV=1
P17891	CLC1 (P17891)	0.00120443	0.000673726	7.18335e+06	1.06518e+07	1.48285	Clathrin light chain OS=Saccharomyces cerevisiae (strain ATCC 204508 / S288c) GN=CLC1 PE=1 SV=1
P15703	BGL2 (P15703)	8.434e-05	7.1112e-05	3.45978e+07	5.12573e+07	1.48152	Glucan 1,3-beta-glucosidase OS=Saccharomyces cerevisiae (strain ATCC 204508 / S288c) GN=BGL2 PE=1 SV=1
P07213	TOM70 (P07213)	3.97934e-07	9.57635e-07	9.82662e+06	1.45331e+07	1.47895	Mitochondrial import receptor subunit TOM70 OS=Saccharomyces cerevisiae (strain ATCC 204508 / S288c) GN=TOM70 PE=1 SV=2
P38261	EXO84 (P38261)	0.0673647	0.0212283	369812	546720	1.47837	Exocyst complex component EXO84 OS=Saccharomyces cerevisiae (strain ATCC 204508 / S288c) GN=EXO84 PE=1 SV=1
P42934	PMT6 (P42934)	0.0824626	0.0250651	161131	238144	1.47795	Dolichyl-phosphate-mannose--protein mannosyltransferase 6 OS=Saccharomyces cerevisiae (strain ATCC 204508 / S288c) GN=PMT6 PE=1 SV=1
Q04179	URH1 (Q04179)	0.000786269	0.000470925	269444	398109	1.47752	Uridine nucleosidase OS=Saccharomyces cerevisiae (strain ATCC 204508 / S288c) GN=URH1 PE=1 SV=2
P38132	MCM7 (P38132)	0.00249643	0.00126048	344810	508929	1.47597	DNA replication licensing factor MCM7 OS=Saccharomyces cerevisiae (strain ATCC 204508 / S288c) GN=MCM7 PE=1 SV=4
Q99394	TRS33 (Q99394)	0.019627	0.00738093	291355	429526	1.47424	Trafficking protein particle complex subunit 33 OS=Saccharomyces cerevisiae (strain ATCC 204508 / S288c) GN=TRS33 PE=1 SV=1
Q03954	SPC19 (Q03954)	0.0047124	0.00215669	457026	672829	1.47219	DASH complex subunit SPC19 OS=Saccharomyces cerevisiae (strain ATCC 204508 / S288c) GN=SPC19 PE=1 SV=1
P38822	BZZ1 (P38822)	0.0359596	0.012293	1.63251e+06	2.40135e+06	1.47095	Protein BZZ1 OS=Saccharomyces cerevisiae (strain ATCC 204508 / S288c) GN=BZZ1 PE=1 SV=1
P47075	VTC4 (P47075)	7.43367e-05	6.42533e-05	5.44291e+06	7.99831e+06	1.46949	Vacuolar transporter chaperone 4 OS=Saccharomyces cerevisiae (strain ATCC 204508 / S288c) GN=VTC4 PE=1 SV=2
P53093	YIP4 (P53093)	0.00350783	0.0016632	537852	790174	1.46913	Protein YIP4 OS=Saccharomyces cerevisiae (strain ATCC 204508 / S288c) GN=YIP4 PE=1 SV=2
Q03661	ESC1 (Q03661)	0.0013165	0.000730913	294439	432545	1.46905	Silent chromatin protein ESC1 OS=Saccharomyces cerevisiae (strain ATCC 204508 / S288c) GN=ESC1 PE=1 SV=1
Q12511	PTC5 (Q12511)	0.0356056	0.0121907	595491	874787	1.46902	[Pyruvate dehydrogenase [acetyl-transferring]]-phosphatase 1, mitochondrial OS=Saccharomyces cerevisiae (strain ATCC 204508 / S288c) GN=PTC5 PE=1 SV=1
P53879	RHO5 (P53879)	0.000104111	8.49406e-05	1.09685e+06	1.61049e+06	1.46829	GTP-binding protein RHO5 OS=Saccharomyces cerevisiae (strain ATCC 204508 / S288c) GN=RHO5 PE=1 SV=2
P38254	PBY1 (P38254)	0.0747314	0.0231143	970864	1.42509e+06	1.46786	Probable tubulin--tyrosine ligase PBY1 OS=Saccharomyces cerevisiae (strain ATCC 204508 / S288c) GN=PBY1 PE=1 SV=2
P40485	SLM1 (P40485)	0.00776173	0.00330534	1.09997e+06	1.61387e+06	1.46719	Phosphatidylinositol 4,5-bisphosphate-binding protein SLM1 OS=Saccharomyces cerevisiae (strain ATCC 204508 / S288c) GN=SLM1 PE=1 SV=1
P40535	CST6 (P40535)	0.000548188	0.000346311	736172	1.07869e+06	1.46527	ATF/CREB activator 2 OS=Saccharomyces cerevisiae (strain ATCC 204508 / S288c) GN=CST6 PE=1 SV=1
P32327	PYC2 (P32327)	0.000450903	0.000291177	1.11732e+07	1.63637e+07	1.46454	Pyruvate carboxylase 2 OS=Saccharomyces cerevisiae (strain ATCC 204508 / S288c) GN=PYC2 PE=1 SV=2
P53272	YGR122W (P53272)	0.00135844	0.000751086	163832	239909	1.46436	Uncharacterized protein YGR122W OS=Saccharomyces cerevisiae (strain ATCC 204508 / S288c) GN=YGR122W PE=1 SV=1
P39966	PTC2 (P39966)	9.68644e-05	8.01535e-05	3.65362e+06	5.34958e+06	1.46419	Protein phosphatase 2C homolog 2 OS=Saccharomyces cerevisiae (strain ATCC 204508 / S288c) GN=PTC2 PE=1 SV=1
Q05029	BCH1 (Q05029)	0.0132891	0.00528971	2.89047e+06	4.23037e+06	1.46356	Protein BCH1 OS=Saccharomyces cerevisiae (strain ATCC 204508 / S288c) GN=BCH1 PE=1 SV=1
P47096	BNA1 (P47096)	0.00233633	0.00118952	223870	327546	1.46311	3-hydroxyanthranilate 3,4-dioxygenase OS=Saccharomyces cerevisiae (strain ATCC 204508 / S288c) GN=BNA1 PE=1 SV=1
Q02979	GDE1 (Q02979)	0.000228967	0.000163096	619564	906337	1.46286	Glycerophosphodiester phosphodiesterase GDE1 OS=Saccharomyces cerevisiae (strain ATCC 204508 / S288c) GN=GDE1 PE=1 SV=1
P06245	TPK2 (P06245)	0.00205229	0.00106352	705399	1.0308e+06	1.4613	cAMP-dependent protein kinase type 2 OS=Saccharomyces cerevisiae (strain ATCC 204508 / S288c) GN=TPK2 PE=1 SV=2
P32485	HOG1 (P32485)	9.67878e-07	1.9329e-06	3.67986e+06	5.37642e+06	1.46104	Mitogen-activated protein kinase HOG1 OS=Saccharomyces cerevisiae (strain ATCC 204508 / S288c) GN=HOG1 PE=1 SV=2
P53899	YNL155W (P53899)	0.0383392	0.0129804	525574	767868	1.46101	CDC48-associated ubiquitin-like/zinc finger protein 1 OS=Saccharomyces cerevisiae (strain ATCC 204508 / S288c) GN=CUZ1 PE=1 SV=1
Q99297	ODC2 (Q99297)	0.00537712	0.00241433	657792	960723	1.46053	Mitochondrial 2-oxodicarboxylate carrier 2 OS=Saccharomyces cerevisiae (strain ATCC 204508 / S288c) GN=ODC2 PE=1 SV=1
P43569	CAF16 (P43569)	0.0745584	0.0230714	195682	285702	1.46003	CCR4-associated factor 16 OS=Saccharomyces cerevisiae (strain ATCC 204508 / S288c) GN=CAF16 PE=1 SV=1
P39984	HAT2 (P39984)	0.00168697	0.000900721	609643	889871	1.45966	Histone acetyltransferase type B subunit 2 OS=Saccharomyces cerevisiae (strain ATCC 204508 / S288c) GN=HAT2 PE=1 SV=1
P08456	CHO1 (P08456)	0.00119145	0.000667787	1.18469e+06	1.72914e+06	1.45957	CDP-diacylglycerol--serine O-phosphatidyltransferase OS=Saccharomyces cerevisiae (strain ATCC 204508 / S288c) GN=CHO1 PE=1 SV=3
Q05933	ARC18 (Q05933)	3.21185e-06	4.80707e-06	5.16252e+06	7.53027e+06	1.45864	Actin-related protein 2/3 complex subunit 3 OS=Saccharomyces cerevisiae (strain ATCC 204508 / S288c) GN=ARC18 PE=1 SV=1
P25332	RBK1 (P25332)	0.00247686	0.00125344	452504	659699	1.45789	Probable ribokinase OS=Saccharomyces cerevisiae (strain ATCC 204508 / S288c) GN=RBK1 PE=1 SV=2
P38692	KIC1 (P38692)	0.0736008	0.0228173	196260	286003	1.45727	Serine/threonine-protein kinase KIC1 OS=Saccharomyces cerevisiae (strain ATCC 204508 / S288c) GN=KIC1 PE=1 SV=1
P39962	YCK3 (P39962)	0.00115046	0.000650611	349070	507886	1.45497	Casein kinase I homolog 3 OS=Saccharomyces cerevisiae (strain ATCC 204508 / S288c) GN=YCK3 PE=1 SV=2
P43582	WWM1 (P43582)	2.05006e-05	2.17037e-05	6.1549e+06	8.94533e+06	1.45337	WW domain-containing protein WWM1 OS=Saccharomyces cerevisiae (strain ATCC 204508 / S288c) GN=WWM1 PE=1 SV=1
P53107	YRB30 (P53107)	0.00016297	0.000122919	214391	311517	1.45303	Ran-specific GTPase-activating protein 30 OS=Saccharomyces cerevisiae (strain ATCC 204508 / S288c) GN=YRB30 PE=1 SV=1
Q08227	INP54 (Q08227)	0.0228502	0.00840408	277666	402967	1.45127	Phosphatidylinositol 4,5-bisphosphate 5-phosphatase INP54 OS=Saccharomyces cerevisiae (strain ATCC 204508 / S288c) GN=INP54 PE=1 SV=1
Q05931	SSQ1 (Q05931)	8.26206e-06	1.0142e-05	419751	608817	1.45042	Heat shock protein SSQ1, mitochondrial OS=Saccharomyces cerevisiae (strain ATCC 204508 / S288c) GN=SSQ1 PE=1 SV=1
Q12745	SEC39 (Q12745)	0.0459866	0.015148	908116	1.31648e+06	1.44969	Protein transport protein SEC39 OS=Saccharomyces cerevisiae (strain ATCC 204508 / S288c) GN=SEC39 PE=1 SV=1
Q04371	YMR027W (Q04371)	0.0014296	0.000781389	2.77277e+06	4.01631e+06	1.44848	UPF0364 protein YMR027W OS=Saccharomyces cerevisiae (strain ATCC 204508 / S288c) GN=YMR027W PE=1 SV=1
P00447	SOD2 (P00447)	0.000386028	0.000254692	2.71461e+06	3.92822e+06	1.44707	Superoxide dismutase [Mn], mitochondrial OS=Saccharomyces cerevisiae (strain ATCC 204508 / S288c) GN=SOD2 PE=1 SV=1
P32599	SAC6 (P32599)	0.000131959	0.000103375	2.24186e+07	3.24191e+07	1.44609	Fimbrin OS=Saccharomyces cerevisiae (strain ATCC 204508 / S288c) GN=SAC6 PE=1 SV=1
P53889	FMP41 (P53889)	0.00222174	0.00113637	4.38383e+06	6.3365e+06	1.44543	Uncharacterized mitochondrial hydrolase FMP41 OS=Saccharomyces cerevisiae (strain ATCC 204508 / S288c) GN=FMP41 PE=1 SV=1
P38840	ARO9 (P38840)	1.65338e-05	1.82229e-05	4.14559e+06	5.99116e+06	1.44519	Aromatic amino acid aminotransferase 2 OS=Saccharomyces cerevisiae (strain ATCC 204508 / S288c) GN=ARO9 PE=1 SV=3
P53843	IST1 (P53843)	5.14062e-07	1.14257e-06	621395	897361	1.44411	Vacuolar protein sorting-associated protein IST1 OS=Saccharomyces cerevisiae (strain ATCC 204508 / S288c) GN=IST1 PE=1 SV=1
Q04934	IVY1 (Q04934)	0.123914	0.0353216	332990	480731	1.44368	Protein IVY1 OS=Saccharomyces cerevisiae (strain ATCC 204508 / S288c) GN=IVY1 PE=1 SV=1
Q04894	ADH6 (Q04894)	1.02992e-07	3.68466e-07	1.82518e+07	2.63128e+07	1.44166	NADP-dependent alcohol dehydrogenase 6 OS=Saccharomyces cerevisiae (strain ATCC 204508 / S288c) GN=ADH6 PE=1 SV=1
O94742	SEM1 (O94742)	0.00397137	0.00185927	8.30362e+06	1.19627e+07	1.44067	26S proteasome complex subunit SEM1 OS=Saccharomyces cerevisiae (strain ATCC 204508 / S288c) GN=SEM1 PE=1 SV=1
P15891	ABP1 (P15891)	1.13495e-05	1.31365e-05	3.70716e+07	5.34027e+07	1.44053	Actin-binding protein OS=Saccharomyces cerevisiae (strain ATCC 204508 / S288c) GN=ABP1 PE=1 SV=4
Q12453	CEX1 (Q12453)	0.000404782	0.000264457	1.27354e+06	1.83413e+06	1.44018	Cytoplasmic export protein 1 OS=Saccharomyces cerevisiae (strain ATCC 204508 / S288c) GN=CEX1 PE=1 SV=1
Q01976	YSA1 (Q01976)	3.33633e-07	8.42803e-07	7.93449e+06	1.14173e+07	1.43895	ADP-ribose pyrophosphatase OS=Saccharomyces cerevisiae (strain ATCC 204508 / S288c) GN=YSA1 PE=1 SV=2
P15436	POL3 (P15436)	0.596743	0.131715	781111	1.12387e+06	1.43881	DNA polymerase delta catalytic subunit OS=Saccharomyces cerevisiae (strain ATCC 204508 / S288c) GN=POL3 PE=1 SV=4
P32356	NTH1 (P32356)	3.32462e-06	4.94269e-06	1.41556e+06	2.03497e+06	1.43757	Neutral trehalase OS=Saccharomyces cerevisiae (strain ATCC 204508 / S288c) GN=NTH1 PE=1 SV=3
P04076	ARG4 (P04076)	0.000143515	0.000110107	694381	996918	1.43569	Argininosuccinate lyase OS=Saccharomyces cerevisiae (strain ATCC 204508 / S288c) GN=ARG4 PE=1 SV=2
Q07451	YET3 (Q07451)	3.34218e-05	3.24993e-05	2.22988e+06	3.20014e+06	1.43512	Endoplasmic reticulum transmembrane protein 3 OS=Saccharomyces cerevisiae (strain ATCC 204508 / S288c) GN=YET3 PE=1 SV=1
P38720	GND1 (P38720)	2.7648e-06	4.28168e-06	6.77688e+07	9.72434e+07	1.43493	6-phosphogluconate dehydrogenase, decarboxylating 1 OS=Saccharomyces cerevisiae (strain ATCC 204508 / S288c) GN=GND1 PE=1 SV=1
P34221	PTC3 (P34221)	1.37371e-05	1.55241e-05	3.98843e+06	5.72278e+06	1.43485	Protein phosphatase 2C homolog 3 OS=Saccharomyces cerevisiae (strain ATCC 204508 / S288c) GN=PTC3 PE=1 SV=4
P38247	SLM4 (P38247)	0.00445708	0.00205219	818228	1.17325e+06	1.4339	Protein SLM4 OS=Saccharomyces cerevisiae (strain ATCC 204508 / S288c) GN=SLM4 PE=1 SV=1
P25604	STP22 (P25604)	0.000845713	0.000502033	497741	713693	1.43386	Suppressor protein STP22 of temperature-sensitive alpha-factor receptor and arginine permease OS=Saccharomyces cerevisiae (strain ATCC 204508 / S288c) GN=STP22 PE=1 SV=3
P16451	PDX1 (P16451)	2.66594e-06	4.14778e-06	4.45414e+06	6.38315e+06	1.43308	Pyruvate dehydrogenase complex protein X component, mitochondrial OS=Saccharomyces cerevisiae (strain ATCC 204508 / S288c) GN=PDX1 PE=1 SV=1
P08566	ARO1 (P08566)	2.04674e-09	2.53572e-08	1.00753e+07	1.44204e+07	1.43126	Pentafunctional AROM polypeptide OS=Saccharomyces cerevisiae (strain ATCC 204508 / S288c) GN=ARO1 PE=1 SV=1
P34761	WHI3 (P34761)	6.08885e-05	5.44586e-05	1.32226e+06	1.89177e+06	1.43071	Protein WHI3 OS=Saccharomyces cerevisiae (strain ATCC 204508 / S288c) GN=WHI3 PE=1 SV=1
P18900	COQ1 (P18900)	0.00187096	0.000984034	290033	414810	1.43022	Hexaprenyl pyrophosphate synthase, mitochondrial OS=Saccharomyces cerevisiae (strain ATCC 204508 / S288c) GN=COQ1 PE=1 SV=1
P47057	SNX4 (P47057)	0.00119281	0.000667787	586786	838856	1.42958	Sorting nexin-4 OS=Saccharomyces cerevisiae (strain ATCC 204508 / S288c) GN=SNX4 PE=1 SV=1
P13517	CAP2 (P13517)	9.89146e-08	3.57703e-07	6.24127e+06	8.92165e+06	1.42946	F-actin-capping protein subunit beta OS=Saccharomyces cerevisiae (strain ATCC 204508 / S288c) GN=CAP2 PE=1 SV=3
Q6Q560	ISD11 (Q6Q560)	0.0430046	0.0143351	716059	1.02297e+06	1.42861	Protein ISD11 OS=Saccharomyces cerevisiae (strain ATCC 204508 / S288c) GN=ISD11 PE=1 SV=1
P47123	MOG1 (P47123)	0.00147204	0.000800657	762838	1.08877e+06	1.42726	Nuclear import protein MOG1 OS=Saccharomyces cerevisiae (strain ATCC 204508 / S288c) GN=MOG1 PE=1 SV=1
P12686	MRP13 (P12686)	0.00321444	0.00154712	1.75411e+06	2.50202e+06	1.42638	37S ribosomal protein MRP13, mitochondrial OS=Saccharomyces cerevisiae (strain ATCC 204508 / S288c) GN=MRP13 PE=1 SV=2
P43638	MHP1 (P43638)	0.000136149	0.000105544	665832	949083	1.42541	MAP-homologous protein 1 OS=Saccharomyces cerevisiae (strain ATCC 204508 / S288c) GN=MHP1 PE=1 SV=1
P40084	RTR1 (P40084)	0.00289617	0.00141843	436150	620337	1.4223	RNA polymerase II subunit B1 CTD phosphatase RTR1 OS=Saccharomyces cerevisiae (strain ATCC 204508 / S288c) GN=RTR1 PE=1 SV=1
P53550	DCP2 (P53550)	0.0373349	0.0126854	842320	1.19513e+06	1.41885	mRNA-decapping enzyme subunit 2 OS=Saccharomyces cerevisiae (strain ATCC 204508 / S288c) GN=DCP2 PE=1 SV=1
P08524	ERG20 (P08524)	0.000327575	0.0002212	2.15399e+07	3.05145e+07	1.41665	Farnesyl pyrophosphate synthase OS=Saccharomyces cerevisiae (strain ATCC 204508 / S288c) GN=ERG20 PE=1 SV=2
P17157	PHO85 (P17157)	0.182923	0.0490885	2.73291e+06	3.86825e+06	1.41543	Cyclin-dependent protein kinase PHO85 OS=Saccharomyces cerevisiae (strain ATCC 204508 / S288c) GN=PHO85 PE=1 SV=2
Q05788	PNP1 (Q05788)	0.00016392	0.000123495	1.48917e+06	2.10746e+06	1.4152	Purine nucleoside phosphorylase OS=Saccharomyces cerevisiae (strain ATCC 204508 / S288c) GN=PNP1 PE=1 SV=1
P32864	MRS6 (P32864)	0.000141248	0.000108722	1.58804e+06	2.24229e+06	1.41199	Rab proteins geranylgeranyltransferase component A OS=Saccharomyces cerevisiae (strain ATCC 204508 / S288c) GN=MRS6 PE=1 SV=2
P39721	AIM2 (P39721)	0.711794	0.15214	1.70463e+06	2.40525e+06	1.41101	Protein AIM2 OS=Saccharomyces cerevisiae (strain ATCC 204508 / S288c) GN=AIM2 PE=1 SV=1
P37898	AAP1 (P37898)	1.18847e-06	2.23972e-06	1.34325e+07	1.89197e+07	1.40851	Alanine/arginine aminopeptidase OS=Saccharomyces cerevisiae (strain ATCC 204508 / S288c) GN=AAP1 PE=1 SV=2
Q06624	AOS1 (Q06624)	0.00514336	0.00232184	676689	952849	1.40811	DNA damage tolerance protein RHC31 OS=Saccharomyces cerevisiae (strain ATCC 204508 / S288c) GN=AOS1 PE=1 SV=1
P38281	APD1 (P38281)	6.40527e-07	1.37346e-06	2.50078e+06	3.51859e+06	1.407	Actin patches distal protein 1 OS=Saccharomyces cerevisiae (strain ATCC 204508 / S288c) GN=APD1 PE=1 SV=1
P47131	YJR085C (P47131)	0.0146576	0.00576153	913182	1.28331e+06	1.40532	UPF0136 membrane protein YJR085C OS=Saccharomyces cerevisiae (strain ATCC 204508 / S288c) GN=YJR085C PE=1 SV=1
P32897	TIM23 (P32897)	3.88456e-08	1.92505e-07	3.39372e+06	4.76851e+06	1.4051	Mitochondrial import inner membrane translocase subunit TIM23 OS=Saccharomyces cerevisiae (strain ATCC 204508 / S288c) GN=TIM23 PE=1 SV=1
P46676	SUM1 (P46676)	0.00401247	0.00187457	712121	999984	1.40423	Suppressor of mar1-1 protein OS=Saccharomyces cerevisiae (strain ATCC 204508 / S288c) GN=SUM1 PE=1 SV=2
Q00055	GPD1 (Q00055)	1.89467e-08	1.1629e-07	1.47592e+07	2.07229e+07	1.40407	Glycerol-3-phosphate dehydrogenase [NAD(+)] 1 OS=Saccharomyces cerevisiae (strain ATCC 204508 / S288c) GN=GPD1 PE=1 SV=4
P38615	RIM11 (P38615)	0.000131201	0.000102901	432109	606246	1.40299	Serine/threonine-protein kinase RIM11/MSD1 OS=Saccharomyces cerevisiae (strain ATCC 204508 / S288c) GN=RIM11 PE=1 SV=1
Q01476	UBP2 (Q01476)	0.000230925	0.000164004	1.25516e+06	1.75696e+06	1.3998	Ubiquitin carboxyl-terminal hydrolase 2 OS=Saccharomyces cerevisiae (strain ATCC 204508 / S288c) GN=UBP2 PE=1 SV=2
P03965	CPA2 (P03965)	1.87013e-06	3.14356e-06	6.98565e+06	9.77347e+06	1.39908	Carbamoyl-phosphate synthase arginine-specific large chain OS=Saccharomyces cerevisiae (strain ATCC 204508 / S288c) GN=CPA2 PE=1 SV=1
P25623	SYP1 (P25623)	1.98927e-05	2.1251e-05	4.17983e+06	5.8421e+06	1.39769	Suppressor of yeast profilin deletion OS=Saccharomyces cerevisiae (strain ATCC 204508 / S288c) GN=SYP1 PE=1 SV=3
P36114	YKR018C (P36114)	0.00108811	0.000621124	3.05992e+06	4.2748e+06	1.39703	Mitochondrial outer membrane protein YKR018C OS=Saccharomyces cerevisiae (strain ATCC 204508 / S288c) GN=YKR018C PE=1 SV=1
Q06523	YPR148C (Q06523)	2.06995e-08	1.22504e-07	6.61399e+06	9.2323e+06	1.39587	Uncharacterized protein YPR148C OS=Saccharomyces cerevisiae (strain ATCC 204508 / S288c) GN=YPR148C PE=1 SV=1
P22133	MDH2 (P22133)	7.94861e-06	9.86588e-06	3.08887e+06	4.30921e+06	1.39508	Malate dehydrogenase, cytoplasmic OS=Saccharomyces cerevisiae (strain ATCC 204508 / S288c) GN=MDH2 PE=1 SV=2
Q03735	NAB6 (Q03735)	0.0311046	0.01089	526993	735081	1.39486	RNA-binding protein NAB6 OS=Saccharomyces cerevisiae (strain ATCC 204508 / S288c) GN=NAB6 PE=1 SV=1
Q08412	CUE5 (Q08412)	0.0155423	0.00605943	5.76288e+06	8.03494e+06	1.39426	Ubiquitin-binding protein CUE5 OS=Saccharomyces cerevisiae (strain ATCC 204508 / S288c) GN=CUE5 PE=1 SV=1
P47173	YJR142W (P47173)	0.00040378	0.000264318	423643	590506	1.39388	Uncharacterized protein YJR142W OS=Saccharomyces cerevisiae (strain ATCC 204508 / S288c) GN=YJR142W PE=1 SV=1
P40363	YJL068C (P40363)	2.06853e-07	5.95808e-07	3.4173e+06	4.76261e+06	1.39368	S-formylglutathione hydrolase OS=Saccharomyces cerevisiae (strain ATCC 204508 / S288c) GN=YJL068C PE=1 SV=1
P43585	VTC2 (P43585)	2.22937e-05	2.33774e-05	4.27863e+06	5.96149e+06	1.39332	Vacuolar transporter chaperone 2 OS=Saccharomyces cerevisiae (strain ATCC 204508 / S288c) GN=VTC2 PE=1 SV=1
P32798	COT1 (P32798)	0.000366446	0.000244667	692213	964095	1.39277	Cobalt uptake protein COT1 OS=Saccharomyces cerevisiae (strain ATCC 204508 / S288c) GN=COT1 PE=1 SV=2
P36041	EAP1 (P36041)	0.0361593	0.0123499	2.23416e+06	3.11118e+06	1.39255	Protein EAP1 OS=Saccharomyces cerevisiae (strain ATCC 204508 / S288c) GN=EAP1 PE=1 SV=1
P31383	TPD3 (P31383)	0.0242587	0.0088155	6.38505e+06	8.89e+06	1.39231	Protein phosphatase PP2A regulatory subunit A OS=Saccharomyces cerevisiae (strain ATCC 204508 / S288c) GN=TPD3 PE=1 SV=3
P53206	YGR012W (P53206)	0.0926171	0.0275386	1.31473e+06	1.82773e+06	1.39019	Putative cysteine synthase OS=Saccharomyces cerevisiae (strain ATCC 204508 / S288c) GN=YGR012W PE=1 SV=1
P10591	SSA1 (P10591)	2.34419e-06	3.76992e-06	2.33273e+08	3.24202e+08	1.3898	Heat shock protein SSA1 OS=Saccharomyces cerevisiae (strain ATCC 204508 / S288c) GN=SSA1 PE=1 SV=4
P50111	ZDS1 (P50111)	0.00166202	0.000888819	161450	224364	1.38968	Protein ZDS1 OS=Saccharomyces cerevisiae (strain ATCC 204508 / S288c) GN=ZDS1 PE=1 SV=1
P32454	APE2 (P32454)	5.65049e-06	7.38328e-06	1.79969e+07	2.50049e+07	1.3894	Aminopeptidase 2, mitochondrial OS=Saccharomyces cerevisiae (strain ATCC 204508 / S288c) GN=APE2 PE=1 SV=4
P38255	RXT2 (P38255)	0.141115	0.0396004	456175	633600	1.38894	Transcriptional regulatory protein RXT2 OS=Saccharomyces cerevisiae (strain ATCC 204508 / S288c) GN=RXT2 PE=1 SV=2
P29311	BMH1 (P29311)	3.38767e-06	4.99204e-06	1.08343e+08	1.50321e+08	1.38746	Protein BMH1 OS=Saccharomyces cerevisiae (strain ATCC 204508 / S288c) GN=BMH1 PE=1 SV=4
P01123	YPT1 (P01123)	0.0023623	0.00120183	1.98894e+07	2.7588e+07	1.38707	GTP-binding protein YPT1 OS=Saccharomyces cerevisiae (strain ATCC 204508 / S288c) GN=YPT1 PE=1 SV=2
P37370	VRP1 (P37370)	0.0157647	0.00613899	1.77784e+06	2.46547e+06	1.38677	Verprolin OS=Saccharomyces cerevisiae (strain ATCC 204508 / S288c) GN=VRP1 PE=1 SV=2
P07275	PUT2 (P07275)	0.00154255	0.000834263	5.71327e+06	7.91169e+06	1.38479	Delta-1-pyrroline-5-carboxylate dehydrogenase, mitochondrial OS=Saccharomyces cerevisiae (strain ATCC 204508 / S288c) GN=PUT2 PE=1 SV=2
Q06682	UBX5 (Q06682)	0.00736001	0.00314628	566685	784356	1.38411	UBX domain-containing protein 5 OS=Saccharomyces cerevisiae (strain ATCC 204508 / S288c) GN=UBX5 PE=1 SV=1
P25374	NFS1 (P25374)	2.24385e-06	3.67031e-06	3.82119e+06	5.28776e+06	1.3838	Cysteine desulfurase, mitochondrial OS=Saccharomyces cerevisiae (strain ATCC 204508 / S288c) GN=NFS1 PE=1 SV=2
P50086	NAS6 (P50086)	0.0279772	0.00994002	1.26993e+06	1.75607e+06	1.38281	Probable 26S proteasome regulatory subunit p28 OS=Saccharomyces cerevisiae (strain ATCC 204508 / S288c) GN=NAS6 PE=1 SV=1
P38523	MGE1 (P38523)	2.1371e-06	3.52154e-06	6.64498e+06	9.18411e+06	1.38211	GrpE protein homolog, mitochondrial OS=Saccharomyces cerevisiae (strain ATCC 204508 / S288c) GN=MGE1 PE=1 SV=1
P21954	IDP1 (P21954)	1.34584e-05	1.52349e-05	2.36403e+07	3.26638e+07	1.3817	Isocitrate dehydrogenase [NADP], mitochondrial OS=Saccharomyces cerevisiae (strain ATCC 204508 / S288c) GN=IDP1 PE=1 SV=1
Q99247	YOL087C (Q99247)	0.0810491	0.0247367	8581.57	11851.9	1.38109	Uncharacterized WD repeat-containing protein YOL087C OS=Saccharomyces cerevisiae (strain ATCC 204508 / S288c) GN=YOL087C PE=1 SV=1
P40549	MNT3 (P40549)	0.63203	0.138046	376817	520181	1.38046	Alpha-1,3-mannosyltransferase MNT3 OS=Saccharomyces cerevisiae (strain ATCC 204508 / S288c) GN=MNT3 PE=1 SV=1
Q02205	MEH1 (Q02205)	0.00255346	0.00128128	738667	1.01889e+06	1.37937	Protein MEH1 OS=Saccharomyces cerevisiae (strain ATCC 204508 / S288c) GN=MEH1 PE=1 SV=1
P36040	ADD66 (P36040)	0.00506877	0.00229436	996577	1.37387e+06	1.37859	Proteasome assembly chaperone 2 OS=Saccharomyces cerevisiae (strain ATCC 204508 / S288c) GN=ADD66 PE=1 SV=1
P53731	ARC35 (P53731)	3.31609e-05	3.23397e-05	7.05797e+06	9.71635e+06	1.37665	Actin-related protein 2/3 complex subunit 2 OS=Saccharomyces cerevisiae (strain ATCC 204508 / S288c) GN=ARC35 PE=1 SV=1
P53250	TWF1 (P53250)	5.31961e-05	4.82887e-05	1.81706e+06	2.50096e+06	1.37638	Twinfilin-1 OS=Saccharomyces cerevisiae (strain ATCC 204508 / S288c) GN=TWF1 PE=1 SV=1
P46681	DLD2 (P46681)	9.975e-05	8.20834e-05	2.68013e+06	3.68204e+06	1.37383	D-lactate dehydrogenase [cytochrome] 2, mitochondrial OS=Saccharomyces cerevisiae (strain ATCC 204508 / S288c) GN=DLD2 PE=1 SV=1
Q12692	HTZ1 (Q12692)	0.000178413	0.000132918	3.17931e+06	4.36489e+06	1.37291	Histone H2A.Z OS=Saccharomyces cerevisiae (strain ATCC 204508 / S288c) GN=HTZ1 PE=1 SV=3
P40157	VID27 (P40157)	0.00975972	0.00405352	1.46227e+06	2.00652e+06	1.37219	Vacuolar import and degradation protein 27 OS=Saccharomyces cerevisiae (strain ATCC 204508 / S288c) GN=VID27 PE=1 SV=1
P43597	YFR016C (P43597)	0.00017682	0.000132045	1.10803e+06	1.51976e+06	1.37158	Uncharacterized protein YFR016C OS=Saccharomyces cerevisiae (strain ATCC 204508 / S288c) GN=YFR016C PE=1 SV=1
P06208	LEU4 (P06208)	6.48307e-05	5.75231e-05	1.73429e+07	2.3742e+07	1.36898	2-isopropylmalate synthase OS=Saccharomyces cerevisiae (strain ATCC 204508 / S288c) GN=LEU4 PE=1 SV=1
P34760;Q04120		0.000927415	0.000543302	2.0137e+08	2.75423e+08	1.36775	Peroxiredoxin TSA1 OS=Saccharomyces cerevisiae (strain ATCC 204508 / S288c) GN=TSA1 PE=1 SV=3
P23287	CNA1 (P23287)	0.000592939	0.000369695	1.19345e+06	1.63152e+06	1.36705	Serine/threonine-protein phosphatase 2B catalytic subunit A1 OS=Saccharomyces cerevisiae (strain ATCC 204508 / S288c) GN=CNA1 PE=1 SV=2
Q04969	SPC2 (Q04969)	0.000889283	0.000523255	2.28286e+06	3.12037e+06	1.36687	Signal peptidase complex subunit SPC2 OS=Saccharomyces cerevisiae (strain ATCC 204508 / S288c) GN=SPC2 PE=1 SV=1
Q12446	LAS17 (Q12446)	0.00480719	0.00219377	761424	1.04056e+06	1.36659	Proline-rich protein LAS17 OS=Saccharomyces cerevisiae (strain ATCC 204508 / S288c) GN=LAS17 PE=1 SV=1
Q12100	RTK1 (Q12100)	0.197431	0.0521039	34360.7	46926.3	1.3657	Probable serine/threonine-protein kinase RTK1 OS=Saccharomyces cerevisiae (strain ATCC 204508 / S288c) GN=RTK1 PE=1 SV=1
Q12298	YDR061W (Q12298)	1.05997e-07	3.75203e-07	1.24825e+06	1.70398e+06	1.3651	Uncharacterized ABC transporter ATP-binding protein YDR061W OS=Saccharomyces cerevisiae (strain ATCC 204508 / S288c) GN=YDR061W PE=1 SV=1
P47135	JSN1 (P47135)	0.0466786	0.0153608	118740	162001	1.36433	Protein JSN1 OS=Saccharomyces cerevisiae (strain ATCC 204508 / S288c) GN=JSN1 PE=1 SV=1
P38187	UBP13 (P38187)	0.482058	0.110408	268475	366171	1.36389	Ubiquitin carboxyl-terminal hydrolase 13 OS=Saccharomyces cerevisiae (strain ATCC 204508 / S288c) GN=UBP13 PE=1 SV=3
P32473	PDB1 (P32473)	4.97352e-06	6.71549e-06	2.80353e+07	3.82146e+07	1.36309	Pyruvate dehydrogenase E1 component subunit beta, mitochondrial OS=Saccharomyces cerevisiae (strain ATCC 204508 / S288c) GN=PDB1 PE=1 SV=2
P32908	SMC1 (P32908)	0.158748	0.0436482	411090	559656	1.3614	Structural maintenance of chromosomes protein 1 OS=Saccharomyces cerevisiae (strain ATCC 204508 / S288c) GN=SMC1 PE=1 SV=1
Q00955	ACC1 (Q00955)	6.54517e-05	5.79206e-05	2.65206e+07	3.60121e+07	1.35789	Acetyl-CoA carboxylase OS=Saccharomyces cerevisiae (strain ATCC 204508 / S288c) GN=ACC1 PE=1 SV=2
P32912	VAM7 (P32912)	0.000479695	0.000306515	324746	439327	1.35283	Vacuolar morphogenesis protein 7 OS=Saccharomyces cerevisiae (strain ATCC 204508 / S288c) GN=VAM7 PE=1 SV=1
P38075	PDX3 (P38075)	0.000560252	0.000351609	4.94727e+06	6.69122e+06	1.35251	Pyridoxamine 5'-phosphate oxidase OS=Saccharomyces cerevisiae (strain ATCC 204508 / S288c) GN=PDX3 PE=1 SV=1
P36017	VPS21 (P36017)	0.000432498	0.000280102	3.68511e+06	4.97517e+06	1.35008	Vacuolar protein sorting-associated protein 21 OS=Saccharomyces cerevisiae (strain ATCC 204508 / S288c) GN=VPS21 PE=1 SV=1
P36037	DOA1 (P36037)	1.79904e-05	1.97632e-05	1.19836e+06	1.61624e+06	1.34871	Protein DOA1 OS=Saccharomyces cerevisiae (strain ATCC 204508 / S288c) GN=DOA1 PE=1 SV=1
P14020	DPM1 (P14020)	1.84663e-06	3.11991e-06	1.98652e+07	2.67827e+07	1.34822	Dolichol-phosphate mannosyltransferase OS=Saccharomyces cerevisiae (strain ATCC 204508 / S288c) GN=DPM1 PE=1 SV=3
Q02776	TIM50 (Q02776)	4.6593e-05	4.32334e-05	5.14689e+06	6.93781e+06	1.34796	Mitochondrial import inner membrane translocase subunit TIM50 OS=Saccharomyces cerevisiae (strain ATCC 204508 / S288c) GN=TIM50 PE=1 SV=1
P39105	PLB1 (P39105)	6.44314e-05	5.72448e-05	389579	524975	1.34754	Lysophospholipase 1 OS=Saccharomyces cerevisiae (strain ATCC 204508 / S288c) GN=PLB1 PE=1 SV=2
Q07362	PBP4 (Q07362)	0.012346	0.00496073	2.2479e+06	3.02512e+06	1.34576	Protein PBP4 OS=Saccharomyces cerevisiae (strain ATCC 204508 / S288c) GN=PBP4 PE=1 SV=1
P53066	YGL242C (P53066)	5.11681e-05	4.66376e-05	1.02756e+07	1.38103e+07	1.34398	Ankyrin repeat-containing protein YGL242C OS=Saccharomyces cerevisiae (strain ATCC 204508 / S288c) GN=YGL242C PE=1 SV=1
P19358	SAM2 (P19358)	7.54749e-05	6.5069e-05	2.21947e+07	2.98293e+07	1.34398	S-adenosylmethionine synthase 2 OS=Saccharomyces cerevisiae (strain ATCC 204508 / S288c) GN=SAM2 PE=1 SV=3
P40335	PEP8 (P40335)	8.14039e-05	6.91996e-05	1.46797e+06	1.97214e+06	1.34345	Carboxypeptidase Y-deficient protein 8 OS=Saccharomyces cerevisiae (strain ATCC 204508 / S288c) GN=PEP8 PE=1 SV=2
P53152	MMS2 (P53152)	1.92217e-06	3.21677e-06	4.79574e+06	6.43312e+06	1.34142	Ubiquitin-conjugating enzyme variant MMS2 OS=Saccharomyces cerevisiae (strain ATCC 204508 / S288c) GN=MMS2 PE=1 SV=1
P34216	EDE1 (P34216)	0.000949489	0.000552991	6.64149e+06	8.90817e+06	1.34129	EH domain-containing and endocytosis protein 1 OS=Saccharomyces cerevisiae (strain ATCC 204508 / S288c) GN=EDE1 PE=1 SV=2
P33411	PRP18 (P33411)	0.535956	0.120161	94204.2	126309	1.3408	Pre-mRNA-splicing factor 18 OS=Saccharomyces cerevisiae (strain ATCC 204508 / S288c) GN=PRP18 PE=1 SV=3
Q12248	DAD1 (Q12248)	0.0146844	0.00576867	611323	819334	1.34026	DASH complex subunit DAD1 OS=Saccharomyces cerevisiae (strain ATCC 204508 / S288c) GN=DAD1 PE=1 SV=1
P53959	COG6 (P53959)	0.00698939	0.00301093	471262	631121	1.33922	Conserved oligomeric Golgi complex subunit 6 OS=Saccharomyces cerevisiae (strain ATCC 204508 / S288c) GN=COG6 PE=1 SV=1
Q07648	DTD1 (Q07648)	0.023235	0.00852219	797704	1.06748e+06	1.33819	D-tyrosyl-tRNA(Tyr) deacylase OS=Saccharomyces cerevisiae (strain ATCC 204508 / S288c) GN=DTD1 PE=1 SV=1
P19812	UBR1 (P19812)	0.234463	0.0603998	612140	819063	1.33803	E3 ubiquitin-protein ligase UBR1 OS=Saccharomyces cerevisiae (strain ATCC 204508 / S288c) GN=UBR1 PE=1 SV=1
Q04697	GSF2 (Q04697)	3.87992e-05	3.69233e-05	9.43305e+06	1.26163e+07	1.33745	Glucose-signaling factor 2 OS=Saccharomyces cerevisiae (strain ATCC 204508 / S288c) GN=GSF2 PE=1 SV=1
P53265	YGR111W (P53265)	0.00221387	0.00113408	800058	1.06998e+06	1.33738	Uncharacterized protein YGR111W OS=Saccharomyces cerevisiae (strain ATCC 204508 / S288c) GN=YGR111W PE=1 SV=1
P48510	DSK2 (P48510)	0.0226694	0.00835136	1.22611e+07	1.63957e+07	1.33722	Ubiquitin domain-containing protein DSK2 OS=Saccharomyces cerevisiae (strain ATCC 204508 / S288c) GN=DSK2 PE=1 SV=2
P38815	YPT35 (P38815)	0.258026	0.0655113	132004	176483	1.33695	PX domain-containing protein YPT35 OS=Saccharomyces cerevisiae (strain ATCC 204508 / S288c) GN=YPT35 PE=1 SV=1
Q12675	DNF2 (Q12675)	0.105314	0.0307614	745525	995560	1.33538	Phospholipid-transporting ATPase DNF2 OS=Saccharomyces cerevisiae (strain ATCC 204508 / S288c) GN=DNF2 PE=1 SV=1
P57743	LSM3 (P57743)	0.0765334	0.0235844	871865	1.16394e+06	1.335	U6 snRNA-associated Sm-like protein LSm3 OS=Saccharomyces cerevisiae (strain ATCC 204508 / S288c) GN=LSM3 PE=1 SV=1
P53729	YNR029C (P53729)	0.000220347	0.000158066	695738	927720	1.33343	Uncharacterized protein YNR029C OS=Saccharomyces cerevisiae (strain ATCC 204508 / S288c) GN=YNR029C PE=1 SV=1
Q12438	GRX6 (Q12438)	0.0019091	0.00099812	614319	818994	1.33317	Monothiol glutaredoxin-6 OS=Saccharomyces cerevisiae (strain ATCC 204508 / S288c) GN=GRX6 PE=1 SV=1
P38130	KTR3 (P38130)	0.000141386	0.000108722	5.50846e+06	7.34365e+06	1.33316	Probable mannosyltransferase KTR3 OS=Saccharomyces cerevisiae (strain ATCC 204508 / S288c) GN=KTR3 PE=1 SV=1
P47037	SMC3 (P47037)	0.301824	0.0747311	1.73847e+06	2.31595e+06	1.33218	Structural maintenance of chromosomes protein 3 OS=Saccharomyces cerevisiae (strain ATCC 204508 / S288c) GN=SMC3 PE=1 SV=1
P38295	EHT1 (P38295)	0.00104004	0.00059828	4.34535e+06	5.78836e+06	1.33208	Medium-chain fatty acid ethyl ester synthase/esterase 2 OS=Saccharomyces cerevisiae (strain ATCC 204508 / S288c) GN=EHT1 PE=1 SV=1
Q03761	TAF12 (Q03761)	0.0213379	0.00794395	1.08785e+06	1.44798e+06	1.33105	Transcription initiation factor TFIID subunit 12 OS=Saccharomyces cerevisiae (strain ATCC 204508 / S288c) GN=TAF12 PE=1 SV=1
P40357	SEC9 (P40357)	0.0253002	0.00913443	865341	1.15038e+06	1.32939	Protein transport protein SEC9 OS=Saccharomyces cerevisiae (strain ATCC 204508 / S288c) GN=SEC9 PE=1 SV=1
P28495	CAP1 (P28495)	5.74087e-07	1.25105e-06	5.7526e+06	7.64311e+06	1.32864	F-actin-capping protein subunit alpha OS=Saccharomyces cerevisiae (strain ATCC 204508 / S288c) GN=CAP1 PE=1 SV=1
P32608	RTG2 (P32608)	0.00130391	0.000724529	2.52787e+06	3.35822e+06	1.32848	Retrograde regulation protein 2 OS=Saccharomyces cerevisiae (strain ATCC 204508 / S288c) GN=RTG2 PE=1 SV=2
P36047	SDS22 (P36047)	1.25791e-05	1.43365e-05	2.85144e+06	3.78703e+06	1.32811	Protein phosphatase 1 regulatory subunit SDS22 OS=Saccharomyces cerevisiae (strain ATCC 204508 / S288c) GN=SDS22 PE=1 SV=1
P53301	CRH1 (P53301)	0.00633664	0.00276716	8.76552e+06	1.16311e+07	1.32691	Probable glycosidase CRH1 OS=Saccharomyces cerevisiae (strain ATCC 204508 / S288c) GN=CRH1 PE=1 SV=1
Q05031	DFG5 (Q05031)	0.0666465	0.0210715	766001	1.01587e+06	1.3262	Mannan endo-1,6-alpha-mannosidase DFG5 OS=Saccharomyces cerevisiae (strain ATCC 204508 / S288c) GN=DFG5 PE=1 SV=1
P16387	PDA1 (P16387)	7.23518e-06	9.09853e-06	2.49281e+07	3.30447e+07	1.3256	Pyruvate dehydrogenase E1 component subunit alpha, mitochondrial OS=Saccharomyces cerevisiae (strain ATCC 204508 / S288c) GN=PDA1 PE=1 SV=2
P32458	CDC11 (P32458)	0.000110198	8.90381e-05	3.16629e+06	4.19682e+06	1.32547	Cell division control protein 11 OS=Saccharomyces cerevisiae (strain ATCC 204508 / S288c) GN=CDC11 PE=1 SV=1
P69771	DID2 (P69771)	0.00300984	0.00146834	964728	1.2787e+06	1.32545	Vacuolar protein-sorting-associated protein 46 OS=Saccharomyces cerevisiae (strain ATCC 204508 / S288c) GN=DID2 PE=1 SV=1
P34758	SCD5 (P34758)	0.0102258	0.00423338	151477	200769	1.32542	Protein SCD5 OS=Saccharomyces cerevisiae (strain ATCC 204508 / S288c) GN=SCD5 PE=1 SV=1
P28789	HEM3 (P28789)	0.108992	0.0317031	321179	425675	1.32535	Porphobilinogen deaminase OS=Saccharomyces cerevisiae (strain ATCC 204508 / S288c) GN=HEM3 PE=1 SV=1
P39009	DUN1 (P39009)	0.0847891	0.0255402	174330	230961	1.32485	DNA damage response protein kinase DUN1 OS=Saccharomyces cerevisiae (strain ATCC 204508 / S288c) GN=DUN1 PE=1 SV=1
P53326	YGR266W (P53326)	2.91148e-05	2.90719e-05	2.0621e+06	2.73168e+06	1.32471	Uncharacterized protein YGR266W OS=Saccharomyces cerevisiae (strain ATCC 204508 / S288c) GN=YGR266W PE=1 SV=1
P06780	RHO1 (P06780)	0.000129718	0.000101978	1.85742e+07	2.4604e+07	1.32463	GTP-binding protein RHO1 OS=Saccharomyces cerevisiae (strain ATCC 204508 / S288c) GN=RHO1 PE=1 SV=3
Q12168	ACF2 (Q12168)	0.29146	0.072514	415992	551015	1.32458	Endo-1,3(4)-beta-glucanase 2 OS=Saccharomyces cerevisiae (strain ATCC 204508 / S288c) GN=ACF2 PE=1 SV=1
P53969	SAM50 (P53969)	4.04713e-06	5.74857e-06	1.21379e+06	1.60747e+06	1.32434	Sorting assembly machinery 50 kDa subunit OS=Saccharomyces cerevisiae (strain ATCC 204508 / S288c) GN=SAM50 PE=1 SV=1
P32792	YSC83 (P32792)	0.000404535	0.000264457	131322	173824	1.32364	UPF0744 protein YSC83 OS=Saccharomyces cerevisiae (strain ATCC 204508 / S288c) GN=YSC83 PE=1 SV=1
Q07505	YDL086W (Q07505)	0.0648705	0.0205317	4.60364e+06	6.09259e+06	1.32343	Putative carboxymethylenebutenolidase OS=Saccharomyces cerevisiae (strain ATCC 204508 / S288c) GN=YDL086W PE=1 SV=1
P47818	CCC1 (P47818)	3.371e-06	4.97845e-06	717349	946969	1.32009	Protein CCC1 OS=Saccharomyces cerevisiae (strain ATCC 204508 / S288c) GN=CCC1 PE=1 SV=1
Q06169	PEX30 (Q06169)	1.06245e-05	1.247e-05	949168	1.25247e+06	1.31955	Peroxisomal membrane protein PEX30 OS=Saccharomyces cerevisiae (strain ATCC 204508 / S288c) GN=PEX30 PE=1 SV=1
Q05518	YDR348C (Q05518)	0.0230098	0.00845348	1.02589e+06	1.35347e+06	1.31932	Protein PAL1 OS=Saccharomyces cerevisiae (strain ATCC 204508 / S288c) GN=PAL1 PE=1 SV=1
P53082	FRA2 (P53082)	0.00513604	0.0023201	672972	887521	1.31881	Fe repressor of activation 2 OS=Saccharomyces cerevisiae (strain ATCC 204508 / S288c) GN=FRA2 PE=1 SV=1
P38853	KEL1 (P38853)	0.00442298	0.0020379	934771	1.23259e+06	1.3186	Kelch repeat-containing protein 1 OS=Saccharomyces cerevisiae (strain ATCC 204508 / S288c) GN=KEL1 PE=1 SV=1
Q03010	UME1 (Q03010)	0.0158172	0.00615583	1.05908e+06	1.3925e+06	1.31482	Transcriptional regulatory protein UME1 OS=Saccharomyces cerevisiae (strain ATCC 204508 / S288c) GN=UME1 PE=1 SV=1
Q03707	SRC1 (Q03707)	0.00583893	0.00258354	779420	1.02455e+06	1.3145	Inner nuclear membrane protein SRC1 OS=Saccharomyces cerevisiae (strain ATCC 204508 / S288c) GN=SRC1 PE=1 SV=2
P42839	VNX1 (P42839)	0.125971	0.0358773	696592	914995	1.31353	Low affinity vacuolar monovalent cation/H(+) antiporter OS=Saccharomyces cerevisiae (strain ATCC 204508 / S288c) GN=VNX1 PE=1 SV=1
P53210	YGR017W (P53210)	0.0433021	0.0144012	1.48621e+06	1.95192e+06	1.31335	Uncharacterized protein YGR017W OS=Saccharomyces cerevisiae (strain ATCC 204508 / S288c) GN=YGR017W PE=1 SV=1
Q08685	CLP1 (Q08685)	0.0505978	0.0164642	151743	199275	1.31324	mRNA cleavage and polyadenylation factor CLP1 OS=Saccharomyces cerevisiae (strain ATCC 204508 / S288c) GN=CLP1 PE=1 SV=1
P40087	DDI1 (P40087)	7.95313e-05	6.80069e-05	3.85878e+06	5.06711e+06	1.31314	DNA damage-inducible protein 1 OS=Saccharomyces cerevisiae (strain ATCC 204508 / S288c) GN=DDI1 PE=1 SV=1
P53273	YGR125W (P53273)	0.0134086	0.00533323	387312	508525	1.31296	Uncharacterized vacuolar membrane protein YGR125W OS=Saccharomyces cerevisiae (strain ATCC 204508 / S288c) GN=YGR125W PE=1 SV=1
P32347	HEM12 (P32347)	0.0293057	0.010368	444349	583127	1.31232	Uroporphyrinogen decarboxylase OS=Saccharomyces cerevisiae (strain ATCC 204508 / S288c) GN=HEM12 PE=1 SV=1
Q05040	FAR8 (Q05040)	0.0014048	0.000770983	745176	977850	1.31224	Factor arrest protein 8 OS=Saccharomyces cerevisiae (strain ATCC 204508 / S288c) GN=FAR8 PE=1 SV=1
P07170	ADK1 (P07170)	0.0138934	0.00550436	3.98271e+07	5.22561e+07	1.31207	Adenylate kinase OS=Saccharomyces cerevisiae (strain ATCC 204508 / S288c) GN=ADK1 PE=1 SV=2
P40081	YER134C (P40081)	0.00246351	0.00124857	497649	652662	1.31149	Putative magnesium-dependent phosphatase YER134C OS=Saccharomyces cerevisiae (strain ATCC 204508 / S288c) GN=YER134C PE=1 SV=1
P09938	RNR2 (P09938)	1.43123e-06	2.60193e-06	3.06703e+07	4.01952e+07	1.31056	Ribonucleoside-diphosphate reductase small chain 1 OS=Saccharomyces cerevisiae (strain ATCC 204508 / S288c) GN=RNR2 PE=1 SV=2
P53834	HCH1 (P53834)	0.0539837	0.017418	7.14568e+06	9.36309e+06	1.31032	Hsp90 co-chaperone HCH1 OS=Saccharomyces cerevisiae (strain ATCC 204508 / S288c) GN=HCH1 PE=1 SV=1
P38426	TPS3 (P38426)	6.5958e-05	5.81379e-05	3.09051e+06	4.04734e+06	1.3096	Trehalose synthase complex regulatory subunit TPS3 OS=Saccharomyces cerevisiae (strain ATCC 204508 / S288c) GN=TPS3 PE=1 SV=3
Q12697	YPK9 (Q12697)	0.027229	0.00971028	50531	66123	1.30856	Vacuolar cation-transporting ATPase YPK9 OS=Saccharomyces cerevisiae (strain ATCC 204508 / S288c) GN=YPK9 PE=1 SV=1
P53095	DSD1 (P53095)	0.0271333	0.0096865	826595	1.08159e+06	1.30849	D-serine dehydratase OS=Saccharomyces cerevisiae (strain ATCC 204508 / S288c) GN=DSD1 PE=1 SV=2
Q12377	RPN6 (Q12377)	4.79595e-07	1.09507e-06	6.19255e+06	8.09822e+06	1.30774	26S proteasome regulatory subunit RPN6 OS=Saccharomyces cerevisiae (strain ATCC 204508 / S288c) GN=RPN6 PE=1 SV=3
P06787	CMD1 (P06787)	0.00557824	0.00248872	1.65311e+07	2.16131e+07	1.30742	Calmodulin OS=Saccharomyces cerevisiae (strain ATCC 204508 / S288c) GN=CMD1 PE=1 SV=1
P38439	LEO1 (P38439)	0.0238106	0.00869042	1.7083e+06	2.23278e+06	1.30702	RNA polymerase-associated protein LEO1 OS=Saccharomyces cerevisiae (strain ATCC 204508 / S288c) GN=LEO1 PE=1 SV=1
P33204	ARC19 (P33204)	0.0458252	0.0151022	7.93789e+06	1.03603e+07	1.30517	Actin-related protein 2/3 complex subunit 4 OS=Saccharomyces cerevisiae (strain ATCC 204508 / S288c) GN=ARC19 PE=1 SV=2
P40040	THO1 (P40040)	0.00827036	0.00349283	5.96409e+06	7.78378e+06	1.30511	Protein THO1 OS=Saccharomyces cerevisiae (strain ATCC 204508 / S288c) GN=THO1 PE=1 SV=1
P46948	SKI6 (P46948)	0.384033	0.0917736	706205	920533	1.30349	Exosome complex component SKI6 OS=Saccharomyces cerevisiae (strain ATCC 204508 / S288c) GN=SKI6 PE=1 SV=1
P46151	MET12 (P46151)	0.0817152	0.0248956	736347	959512	1.30307	Methylenetetrahydrofolate reductase 1 OS=Saccharomyces cerevisiae (strain ATCC 204508 / S288c) GN=MET12 PE=1 SV=2
P33748	MSN2 (P33748)	0.420334	0.0985658	250831	326791	1.30284	Zinc finger protein MSN2 OS=Saccharomyces cerevisiae (strain ATCC 204508 / S288c) GN=MSN2 PE=1 SV=1
P26570	PPZ1 (P26570)	0.0117069	0.00476114	998730	1.30093e+06	1.30258	Serine/threonine-protein phosphatase PP-Z1 OS=Saccharomyces cerevisiae (strain ATCC 204508 / S288c) GN=PPZ1 PE=1 SV=5
P38089	PTC4 (P38089)	0.000949741	0.000552991	485502	632165	1.30209	Protein phosphatase 2C homolog 4 OS=Saccharomyces cerevisiae (strain ATCC 204508 / S288c) GN=PTC4 PE=1 SV=1
P33338	SLA2 (P33338)	0.000323468	0.000219032	4.7097e+06	6.13103e+06	1.30179	Protein SLA2 OS=Saccharomyces cerevisiae (strain ATCC 204508 / S288c) GN=SLA2 PE=1 SV=5
Q03690	CLU1 (Q03690)	0.00070471	0.000428989	1.77805e+07	2.3145e+07	1.30171	Clustered mitochondria protein 1 OS=Saccharomyces cerevisiae (strain ATCC 204508 / S288c) GN=CLU1 PE=1 SV=1
P38127	RIM2 (P38127)	0.00611673	0.00268867	621292	808427	1.3012	Mitochondrial carrier protein RIM2 OS=Saccharomyces cerevisiae (strain ATCC 204508 / S288c) GN=RIM2 PE=3 SV=1
P40011	YER010C (P40011)	0.00131942	0.000731929	251639	327340	1.30083	4-hydroxy-4-methyl-2-oxoglutarate aldolase OS=Saccharomyces cerevisiae (strain ATCC 204508 / S288c) GN=YER010C PE=1 SV=1
P43613	ERJ5 (P43613)	0.0182873	0.00696324	305618	397455	1.30049	ER-localized J domain-containing protein 5 OS=Saccharomyces cerevisiae (strain ATCC 204508 / S288c) GN=ERJ5 PE=1 SV=1
P14908	MTF1 (P14908)	1.14417e-05	1.32204e-05	329450	428273	1.29996	Mitochondrial transcription factor 1 OS=Saccharomyces cerevisiae (strain ATCC 204508 / S288c) GN=MTF1 PE=1 SV=4
P38819	ERP5 (P38819)	0.00194929	0.00101723	368535	478673	1.29886	Protein ERP5 OS=Saccharomyces cerevisiae (strain ATCC 204508 / S288c) GN=ERP5 PE=1 SV=1
Q04344	HNT1 (Q04344)	0.00270827	0.00134113	1.10626e+07	1.43661e+07	1.29861	Hit family protein 1 OS=Saccharomyces cerevisiae (strain ATCC 204508 / S288c) GN=HNT1 PE=1 SV=2
Q05567	DPL1 (Q05567)	0.013591	0.00539296	3.04577e+06	3.95464e+06	1.2984	Sphingosine-1-phosphate lyase OS=Saccharomyces cerevisiae (strain ATCC 204508 / S288c) GN=DPL1 PE=1 SV=1
P24583	PKC1 (P24583)	0.0262992	0.00943908	156832	203532	1.29777	Protein kinase C-like 1 OS=Saccharomyces cerevisiae (strain ATCC 204508 / S288c) GN=PKC1 PE=1 SV=3
Q03362	YDR476C (Q03362)	0.000278154	0.000192638	1.00161e+06	1.29835e+06	1.29626	Uncharacterized protein YDR476C OS=Saccharomyces cerevisiae (strain ATCC 204508 / S288c) GN=YDR476C PE=1 SV=1
P28321	YJU3 (P28321)	9.47713e-05	7.87606e-05	1.25608e+06	1.6281e+06	1.29617	Monoglyceride lipase OS=Saccharomyces cerevisiae (strain ATCC 204508 / S288c) GN=YJU3 PE=1 SV=2
P28707	SBA1 (P28707)	0.00096729	0.000560878	1.17168e+07	1.51841e+07	1.29593	Co-chaperone protein SBA1 OS=Saccharomyces cerevisiae (strain ATCC 204508 / S288c) GN=SBA1 PE=1 SV=3
P40563	AIM21 (P40563)	0.00577045	0.00255831	1.15713e+06	1.49896e+06	1.29541	Altered inheritance of mitochondria protein 21 OS=Saccharomyces cerevisiae (strain ATCC 204508 / S288c) GN=AIM21 PE=1 SV=1
Q99210	YOR111W (Q99210)	0.000561068	0.000351791	325901	422137	1.29529	Maf-like protein YOR111W OS=Saccharomyces cerevisiae (strain ATCC 204508 / S288c) GN=YOR111W PE=1 SV=1
P32784	SCT1 (P32784)	0.192543	0.051118	215029	278357	1.29451	Glycerol-3-phosphate O-acyltransferase 1 OS=Saccharomyces cerevisiae (strain ATCC 204508 / S288c) GN=SCT1 PE=1 SV=3
Q03323	SDC1 (Q03323)	0.00453118	0.00208344	1.02015e+06	1.3204e+06	1.29432	COMPASS component SDC1 OS=Saccharomyces cerevisiae (strain ATCC 204508 / S288c) GN=SDC1 PE=1 SV=1
P47136	BUD4 (P47136)	0.517457	0.116796	219760	284078	1.29267	Bud site selection protein 4 OS=Saccharomyces cerevisiae (strain ATCC 204508 / S288c) GN=BUD4 PE=1 SV=2
P52920	NBP35 (P52920)	0.0686365	0.0215277	688181	889225	1.29214	Cytosolic Fe-S cluster assembly factor NBP35 OS=Saccharomyces cerevisiae (strain ATCC 204508 / S288c) GN=NBP35 PE=1 SV=1
Q03973	HMO1 (Q03973)	0.00547743	0.00245443	8.90961e+06	1.15077e+07	1.2916	High mobility group protein 1 OS=Saccharomyces cerevisiae (strain ATCC 204508 / S288c) GN=HMO1 PE=1 SV=1
P49435	APT1 (P49435)	0.000190816	0.00014013	7.44193e+06	9.61191e+06	1.29159	Adenine phosphoribosyltransferase 1 OS=Saccharomyces cerevisiae (strain ATCC 204508 / S288c) GN=APT1 PE=1 SV=3
P38878	YHR192W (P38878)	0.212373	0.0555216	681127	879705	1.29154	Protein lunapark OS=Saccharomyces cerevisiae (strain ATCC 204508 / S288c) GN=LNP1 PE=1 SV=1
P14682	CDC34 (P14682)	0.00811765	0.00343504	1.51701e+06	1.95857e+06	1.29108	Ubiquitin-conjugating enzyme E2-34 kDa OS=Saccharomyces cerevisiae (strain ATCC 204508 / S288c) GN=CDC34 PE=1 SV=1
P38810	SFB3 (P38810)	0.0539976	0.017418	3.70764e+06	4.78482e+06	1.29053	SED5-binding protein 3 OS=Saccharomyces cerevisiae (strain ATCC 204508 / S288c) GN=SFB3 PE=1 SV=1
P34248	YKL100C (P34248)	0.0385276	0.0130258	410692	529934	1.29034	Probable intramembrane protease YKL100C OS=Saccharomyces cerevisiae (strain ATCC 204508 / S288c) GN=YKL100C PE=1 SV=1
Q05543	RTT103 (Q05543)	3.72017e-06	5.35554e-06	950243	1.22592e+06	1.29011	Regulator of Ty1 transposition protein 103 OS=Saccharomyces cerevisiae (strain ATCC 204508 / S288c) GN=RTT103 PE=1 SV=1
P89102	SEC5 (P89102)	0.0381794	0.0129394	413514	533450	1.29004	Exocyst complex component SEC5 OS=Saccharomyces cerevisiae (strain ATCC 204508 / S288c) GN=SEC5 PE=1 SV=1
P40505	SDS3 (P40505)	0.23575	0.0606612	528578	681824	1.28992	Transcriptional regulatory protein SDS3 OS=Saccharomyces cerevisiae (strain ATCC 204508 / S288c) GN=SDS3 PE=1 SV=1
P29704	ERG9 (P29704)	0.00118698	0.000666755	6.16259e+06	7.94359e+06	1.289	Squalene synthase OS=Saccharomyces cerevisiae (strain ATCC 204508 / S288c) GN=ERG9 PE=1 SV=2
P53905	LSM7 (P53905)	0.00700581	0.00301413	3.34679e+06	4.3119e+06	1.28837	U6 snRNA-associated Sm-like protein LSm7 OS=Saccharomyces cerevisiae (strain ATCC 204508 / S288c) GN=LSM7 PE=1 SV=2
P40008	FMP52 (P40008)	0.042364	0.0141498	1.86944e+06	2.40653e+06	1.2873	Protein FMP52, mitochondrial OS=Saccharomyces cerevisiae (strain ATCC 204508 / S288c) GN=FMP52 PE=1 SV=1
P33298	RPT3 (P33298)	0.0684757	0.0214974	6.40253e+06	8.2391e+06	1.28685	26S protease regulatory subunit 6B homolog OS=Saccharomyces cerevisiae (strain ATCC 204508 / S288c) GN=RPT3 PE=1 SV=2
P36018	YPT52 (P36018)	0.0527836	0.0171255	5.50963e+06	7.08933e+06	1.28672	GTP-binding protein YPT52 OS=Saccharomyces cerevisiae (strain ATCC 204508 / S288c) GN=YPT52 PE=1 SV=1
P47048	YJL049W (P47048)	0.580405	0.128575	144120	185434	1.28667	Uncharacterized protein YJL049W OS=Saccharomyces cerevisiae (strain ATCC 204508 / S288c) GN=YJL049W PE=1 SV=1
Q12242	RUP1 (Q12242)	0.00698665	0.00301093	356502	458360	1.28571	UBA domain-containing protein RUP1 OS=Saccharomyces cerevisiae (strain ATCC 204508 / S288c) GN=RUP1 PE=1 SV=1
P40564	DJP1 (P40564)	0.516451	0.116687	3.26599e+06	4.19872e+06	1.28559	DnaJ-like protein 1 OS=Saccharomyces cerevisiae (strain ATCC 204508 / S288c) GN=DJP1 PE=1 SV=1
Q03705	CGI121 (Q03705)	0.00571861	0.00254207	1.08491e+06	1.3946e+06	1.28544	EKC/KEOPS complex subunit CGI121 OS=Saccharomyces cerevisiae (strain ATCC 204508 / S288c) GN=CGI121 PE=1 SV=1
P40317	SOK1 (P40317)	0.00268504	0.00133555	467798	601302	1.28539	Protein SOK1 OS=Saccharomyces cerevisiae (strain ATCC 204508 / S288c) GN=SOK1 PE=1 SV=2
P17065	SEC2 (P17065)	0.142411	0.0398973	326583	418923	1.28275	Rab guanine nucleotide exchange factor SEC2 OS=Saccharomyces cerevisiae (strain ATCC 204508 / S288c) GN=SEC2 PE=1 SV=1
P14922	CYC8 (P14922)	0.0391789	0.0132179	5.60023e+06	7.17895e+06	1.2819	General transcriptional corepressor CYC8 OS=Saccharomyces cerevisiae (strain ATCC 204508 / S288c) GN=CYC8 PE=1 SV=2
P46951	YPP1 (P46951)	0.084089	0.0253751	444436	569399	1.28117	Cargo-transport protein YPP1 OS=Saccharomyces cerevisiae (strain ATCC 204508 / S288c) GN=YPP1 PE=1 SV=1
P32432	SFP1 (P32432)	0.574662	0.127472	322711	413331	1.28081	Transcription factor SFP1 OS=Saccharomyces cerevisiae (strain ATCC 204508 / S288c) GN=SFP1 PE=1 SV=1
P38765	YHI9 (P38765)	0.00348219	0.00165574	1.22248e+06	1.56552e+06	1.28061	Uncharacterized isomerase YHI9 OS=Saccharomyces cerevisiae (strain ATCC 204508 / S288c) GN=YHI9 PE=1 SV=1
Q01329	PTA1 (Q01329)	9.24229e-06	1.10612e-05	719462	918790	1.27705	Pre-tRNA-processing protein PTA1 OS=Saccharomyces cerevisiae (strain ATCC 204508 / S288c) GN=PTA1 PE=1 SV=1
P40002	MIT1 (P40002)	0.00260866	0.00130435	2.58851e+06	3.30544e+06	1.27697	Transcriptional regulator MIT1 OS=Saccharomyces cerevisiae (strain ATCC 204508 / S288c) GN=MIT1 PE=1 SV=1
P39726	GCV3 (P39726)	0.015854	0.0061581	8.15825e+06	1.04118e+07	1.27623	Glycine cleavage system H protein, mitochondrial OS=Saccharomyces cerevisiae (strain ATCC 204508 / S288c) GN=GCV3 PE=1 SV=3
Q06336	GGA1 (Q06336)	0.0484403	0.015847	1.34325e+06	1.71213e+06	1.27462	ADP-ribosylation factor-binding protein GGA1 OS=Saccharomyces cerevisiae (strain ATCC 204508 / S288c) GN=GGA1 PE=1 SV=1
P53866	SQS1 (P53866)	0.402648	0.0953085	173207	220720	1.27431	Protein SQS1 OS=Saccharomyces cerevisiae (strain ATCC 204508 / S288c) GN=SQS1 PE=1 SV=1
P47822	SRB7 (P47822)	0.222742	0.0577361	341362	434986	1.27427	Mediator of RNA polymerase II transcription subunit 21 OS=Saccharomyces cerevisiae (strain ATCC 204508 / S288c) GN=SRB7 PE=1 SV=1
Q00776	APM1 (Q00776)	0.0173054	0.00663847	1.11226e+06	1.4166e+06	1.27362	AP-1 complex subunit mu-1-I OS=Saccharomyces cerevisiae (strain ATCC 204508 / S288c) GN=APM1 PE=1 SV=2
Q12466	TCB1 (Q12466)	0.0274414	0.00977561	2.40651e+06	3.06445e+06	1.2734	Tricalbin-1 OS=Saccharomyces cerevisiae (strain ATCC 204508 / S288c) GN=TCB1 PE=1 SV=1
P05318	RPP1A (P05318)	0.0834231	0.0252653	8.38194e+07	1.06704e+08	1.27302	60S acidic ribosomal protein P1-alpha OS=Saccharomyces cerevisiae (strain ATCC 204508 / S288c) GN=RPP1A PE=1 SV=4
P15496	IDI1 (P15496)	0.0143814	0.00567295	1.40204e+07	1.78456e+07	1.27283	Isopentenyl-diphosphate Delta-isomerase OS=Saccharomyces cerevisiae (strain ATCC 204508 / S288c) GN=IDI1 PE=1 SV=2
P07560	SEC4 (P07560)	0.0150621	0.00589626	1.37634e+07	1.75095e+07	1.27218	Ras-related protein SEC4 OS=Saccharomyces cerevisiae (strain ATCC 204508 / S288c) GN=SEC4 PE=1 SV=1
P53935	NST1 (P53935)	0.129199	0.0367031	305789	388889	1.27176	Stress response protein NST1 OS=Saccharomyces cerevisiae (strain ATCC 204508 / S288c) GN=NST1 PE=1 SV=1
Q12250	RPN5 (Q12250)	0.015869	0.0061581	8.99827e+06	1.14371e+07	1.27104	26S proteasome regulatory subunit RPN5 OS=Saccharomyces cerevisiae (strain ATCC 204508 / S288c) GN=RPN5 PE=1 SV=3
Q04728	ARG7 (Q04728)	0.0189377	0.00716197	1.21229e+06	1.54073e+06	1.27092	Arginine biosynthesis bifunctional protein ArgJ, mitochondrial OS=Saccharomyces cerevisiae (strain ATCC 204508 / S288c) GN=ARG7 PE=1 SV=1
P32479	HIR1 (P32479)	0.747669	0.158844	37315.3	47379.2	1.2697	Protein HIR1 OS=Saccharomyces cerevisiae (strain ATCC 204508 / S288c) GN=HIR1 PE=1 SV=3
Q05050	EIS1 (Q05050)	0.00428512	0.00198412	2.68461e+06	3.40862e+06	1.26969	Eisosome protein 1 OS=Saccharomyces cerevisiae (strain ATCC 204508 / S288c) GN=EIS1 PE=1 SV=1
P30619	SEC1 (P30619)	4.02791e-05	3.80073e-05	963822	1.223e+06	1.26891	Protein transport protein SEC1 OS=Saccharomyces cerevisiae (strain ATCC 204508 / S288c) GN=SEC1 PE=1 SV=1
Q12495	RLF2 (Q12495)	0.00502649	0.00227831	47173.4	59852.9	1.26878	Chromatin assembly factor 1 subunit p90 OS=Saccharomyces cerevisiae (strain ATCC 204508 / S288c) GN=RLF2 PE=1 SV=1
P38138	ROT2 (P38138)	0.108547	0.031601	1.48653e+06	1.88599e+06	1.26872	Glucosidase 2 subunit alpha OS=Saccharomyces cerevisiae (strain ATCC 204508 / S288c) GN=ROT2 PE=1 SV=1
Q12063	NUS1 (Q12063)	0.212839	0.0556217	928569	1.17721e+06	1.26777	Dehydrodolichyl diphosphate syntase complex subunit NUS1 OS=Saccharomyces cerevisiae (strain ATCC 204508 / S288c) GN=NUS1 PE=1 SV=1
P32790	SLA1 (P32790)	0.0867933	0.0260384	4.94783e+06	6.26925e+06	1.26707	Actin cytoskeleton-regulatory complex protein SLA1 OS=Saccharomyces cerevisiae (strain ATCC 204508 / S288c) GN=SLA1 PE=1 SV=1
Q12359	ATO3 (Q12359)	0.000170999	0.000127964	2.33563e+06	2.95856e+06	1.26671	Ammonia transport outward protein 3 OS=Saccharomyces cerevisiae (strain ATCC 204508 / S288c) GN=ATO3 PE=1 SV=1
P10080	SBP1 (P10080)	2.92732e-06	4.48296e-06	4.73864e+07	6.00091e+07	1.26638	Single-stranded nucleic acid-binding protein OS=Saccharomyces cerevisiae (strain ATCC 204508 / S288c) GN=SBP1 PE=1 SV=2
P14743	NMT1 (P14743)	0.183091	0.0490992	4.18207e+06	5.29114e+06	1.2652	Glycylpeptide N-tetradecanoyltransferase OS=Saccharomyces cerevisiae (strain ATCC 204508 / S288c) GN=NMT1 PE=1 SV=1
P25651	CSM1 (P25651)	0.489173	0.111808	101479	128379	1.26508	Monopolin complex subunit CSM1 OS=Saccharomyces cerevisiae (strain ATCC 204508 / S288c) GN=CSM1 PE=1 SV=1
P25454	RAD51 (P25454)	0.401575	0.0951002	219490	277526	1.26442	DNA repair protein RAD51 OS=Saccharomyces cerevisiae (strain ATCC 204508 / S288c) GN=RAD51 PE=1 SV=1
P54113	ADE16 (P54113)	0.00685077	0.00296204	1.04194e+07	1.31722e+07	1.26419	Bifunctional purine biosynthesis protein ADE16 OS=Saccharomyces cerevisiae (strain ATCC 204508 / S288c) GN=ADE16 PE=1 SV=1
P38116	ARL1 (P38116)	0.00511852	0.00231375	2.74131e+06	3.46554e+06	1.26419	ADP-ribosylation factor-like protein 1 OS=Saccharomyces cerevisiae (strain ATCC 204508 / S288c) GN=ARL1 PE=1 SV=4
Q02939	TFB2 (Q02939)	0.0441743	0.0146303	370314	468078	1.264	RNA polymerase II transcription factor B subunit 2 OS=Saccharomyces cerevisiae (strain ATCC 204508 / S288c) GN=TFB2 PE=1 SV=1
P38328	ARC40 (P38328)	0.000382033	0.000253528	1.06229e+07	1.34192e+07	1.26323	Actin-related protein 2/3 complex subunit 1 OS=Saccharomyces cerevisiae (strain ATCC 204508 / S288c) GN=ARC40 PE=1 SV=1
P53721	AIM38 (P53721)	0.456744	0.105586	1.47755e+06	1.86266e+06	1.26064	Respiratory supercomplex factor 2, mitochondrial OS=Saccharomyces cerevisiae (strain ATCC 204508 / S288c) GN=RCF2 PE=1 SV=1
P53072	TAN1 (P53072)	0.000113281	9.08706e-05	1.82841e+06	2.30479e+06	1.26055	tRNA acetyltransferase TAN1 OS=Saccharomyces cerevisiae (strain ATCC 204508 / S288c) GN=TAN1 PE=1 SV=1
P47176	BAT2 (P47176)	3.69246e-05	3.53404e-05	2.44567e+07	3.08122e+07	1.25987	Branched-chain-amino-acid aminotransferase, cytosolic OS=Saccharomyces cerevisiae (strain ATCC 204508 / S288c) GN=BAT2 PE=1 SV=1
P38349	UBX7 (P38349)	0.110433	0.0320804	507886	639330	1.2588	UBX domain-containing protein 7 OS=Saccharomyces cerevisiae (strain ATCC 204508 / S288c) GN=UBX7 PE=1 SV=1
Q01454	CTF4 (Q01454)	0.00874631	0.00366504	1.29568e+06	1.63098e+06	1.25879	DNA polymerase alpha-binding protein OS=Saccharomyces cerevisiae (strain ATCC 204508 / S288c) GN=CTF4 PE=1 SV=2
P29478	SEC65 (P29478)	0.000964891	0.000560836	1.99933e+06	2.51435e+06	1.2576	Signal recognition particle subunit SEC65 OS=Saccharomyces cerevisiae (strain ATCC 204508 / S288c) GN=SEC65 PE=1 SV=1
P53178	ALG13 (P53178)	0.0352097	0.0121085	103219	129799	1.2575	UDP-N-acetylglucosamine transferase subunit ALG13 OS=Saccharomyces cerevisiae (strain ATCC 204508 / S288c) GN=ALG13 PE=1 SV=1
P06778	RAD52 (P06778)	0.633408	0.138302	241476	303545	1.25704	DNA repair and recombination protein RAD52 OS=Saccharomyces cerevisiae (strain ATCC 204508 / S288c) GN=RAD52 PE=1 SV=2
P46680	AIP1 (P46680)	0.01668	0.00643919	8.98997e+06	1.12989e+07	1.25684	Actin-interacting protein 1 OS=Saccharomyces cerevisiae (strain ATCC 204508 / S288c) GN=AIP1 PE=1 SV=1
P03871		0.390011	0.0929871	441036	553960	1.25604	Partitioning protein REP1 OS=Saccharomyces cerevisiae (strain ATCC 204508 / S288c) GN=REP1 PE=1 SV=1
P38753	HSE1 (P38753)	0.00549577	0.00245927	835147	1.04898e+06	1.25604	Class E vacuolar protein-sorting machinery protein HSE1 OS=Saccharomyces cerevisiae (strain ATCC 204508 / S288c) GN=HSE1 PE=1 SV=1
Q86ZR7	YKL033W-A (Q86ZR7)	0.000176847	0.000132045	2.53708e+06	3.18552e+06	1.25558	Putative uncharacterized hydrolase YKL033W-A OS=Saccharomyces cerevisiae (strain ATCC 204508 / S288c) GN=YKL033W-A PE=1 SV=2
P21538	REB1 (P21538)	0.000734948	0.000444565	3.49519e+06	4.38749e+06	1.25529	DNA-binding protein REB1 OS=Saccharomyces cerevisiae (strain ATCC 204508 / S288c) GN=REB1 PE=1 SV=2
Q05166	ASM4 (Q05166)	0.160326	0.0439409	437224	546936	1.25093	Nucleoporin ASM4 OS=Saccharomyces cerevisiae (strain ATCC 204508 / S288c) GN=ASM4 PE=1 SV=1
P50107	GLO1 (P50107)	0.00800695	0.00339464	1.90108e+06	2.37508e+06	1.24933	Lactoylglutathione lyase OS=Saccharomyces cerevisiae (strain ATCC 204508 / S288c) GN=GLO1 PE=1 SV=1
P40414	TPM2 (P40414)	0.0189061	0.00715406	6.80082e+06	8.48708e+06	1.24795	Tropomyosin-2 OS=Saccharomyces cerevisiae (strain ATCC 204508 / S288c) GN=TPM2 PE=1 SV=1
P40106	HOR2 (P40106)	0.00108553	0.00062018	2.7197e+06	3.39393e+06	1.24791	Glycerol-1-phosphate phosphohydrolase 2 OS=Saccharomyces cerevisiae (strain ATCC 204508 / S288c) GN=GPP2 PE=1 SV=1
Q12133	SPC3 (Q12133)	0.000112535	9.05982e-05	1.82057e+06	2.27005e+06	1.24689	Signal peptidase complex subunit SPC3 OS=Saccharomyces cerevisiae (strain ATCC 204508 / S288c) GN=SPC3 PE=1 SV=1
P53252	PIL1 (P53252)	0.000220899	0.000158066	6.05035e+07	7.54315e+07	1.24673	Sphingolipid long chain base-responsive protein PIL1 OS=Saccharomyces cerevisiae (strain ATCC 204508 / S288c) GN=PIL1 PE=1 SV=1
P40531	GVP36 (P40531)	0.0022011	0.00112926	3.28522e+07	4.09472e+07	1.24641	Protein GVP36 OS=Saccharomyces cerevisiae (strain ATCC 204508 / S288c) GN=GVP36 PE=1 SV=1
P16370	RPB3 (P16370)	0.00201693	0.00104763	6.17873e+06	7.6963e+06	1.24561	DNA-directed RNA polymerase II subunit RPB3 OS=Saccharomyces cerevisiae (strain ATCC 204508 / S288c) GN=RPB3 PE=1 SV=2
P53318	COQ6 (P53318)	0.000830386	0.00049425	619186	771198	1.2455	Ubiquinone biosynthesis monooxygenase COQ6 OS=Saccharomyces cerevisiae (strain ATCC 204508 / S288c) GN=COQ6 PE=1 SV=1
Q12743	DFM1 (Q12743)	0.00022916	0.000163096	1.8597e+06	2.31501e+06	1.24483	DER1-like family member protein 1 OS=Saccharomyces cerevisiae (strain ATCC 204508 / S288c) GN=DFM1 PE=1 SV=1
P18899	DDR48 (P18899)	0.000191917	0.000140629	6.98739e+06	8.69749e+06	1.24474	Stress protein DDR48 OS=Saccharomyces cerevisiae (strain ATCC 204508 / S288c) GN=DDR48 PE=1 SV=4
P39968	VAC8 (P39968)	0.0144498	0.00569322	3.60061e+06	4.48155e+06	1.24466	Vacuolar protein 8 OS=Saccharomyces cerevisiae (strain ATCC 204508 / S288c) GN=VAC8 PE=1 SV=3
P47133	EMC2 (P47133)	0.0315352	0.0110284	2.50681e+06	3.118e+06	1.24382	ER membrane protein complex subunit 2 OS=Saccharomyces cerevisiae (strain ATCC 204508 / S288c) GN=EMC2 PE=1 SV=1
Q12284	ERV2 (Q12284)	0.177484	0.0478593	1.42636e+06	1.77409e+06	1.24379	FAD-linked sulfhydryl oxidase ERV2 OS=Saccharomyces cerevisiae (strain ATCC 204508 / S288c) GN=ERV2 PE=1 SV=1
P39101	CAJ1 (P39101)	0.000149591	0.000113855	5.25807e+06	6.5283e+06	1.24158	Protein CAJ1 OS=Saccharomyces cerevisiae (strain ATCC 204508 / S288c) GN=CAJ1 PE=1 SV=1
P34162	SRB2 (P34162)	0.640713	0.139578	834219	1.03495e+06	1.24062	Mediator of RNA polymerase II transcription subunit 20 OS=Saccharomyces cerevisiae (strain ATCC 204508 / S288c) GN=SRB2 PE=1 SV=1
Q05785	ENT2 (Q05785)	0.000814391	0.000486461	2.54682e+06	3.15739e+06	1.23974	Epsin-2 OS=Saccharomyces cerevisiae (strain ATCC 204508 / S288c) GN=ENT2 PE=1 SV=1
P22146	GAS1 (P22146)	0.000190677	0.00014013	5.81094e+07	7.20113e+07	1.23924	1,3-beta-glucanosyltransferase GAS1 OS=Saccharomyces cerevisiae (strain ATCC 204508 / S288c) GN=GAS1 PE=1 SV=2
P11491	PHO8 (P11491)	7.55485e-06	9.48102e-06	2.80847e+06	3.48004e+06	1.23912	Repressible alkaline phosphatase OS=Saccharomyces cerevisiae (strain ATCC 204508 / S288c) GN=PHO8 PE=1 SV=2
P21243	SCL1 (P21243)	0.295162	0.0732442	5.11508e+06	6.33726e+06	1.23894	Proteasome subunit alpha type-1 OS=Saccharomyces cerevisiae (strain ATCC 204508 / S288c) GN=SCL1 PE=1 SV=1
Q08162	DIS3 (Q08162)	0.716884	0.152935	2.71423e+06	3.36082e+06	1.23822	Exosome complex exonuclease DIS3 OS=Saccharomyces cerevisiae (strain ATCC 204508 / S288c) GN=DIS3 PE=1 SV=1
P38121	POL12 (P38121)	0.0145888	0.00573785	825932	1.02192e+06	1.2373	DNA polymerase alpha subunit B OS=Saccharomyces cerevisiae (strain ATCC 204508 / S288c) GN=POL12 PE=1 SV=1
P38250	IST2 (P38250)	0.00232156	0.0011838	5.35702e+06	6.62636e+06	1.23695	Increased sodium tolerance protein 2 OS=Saccharomyces cerevisiae (strain ATCC 204508 / S288c) GN=IST2 PE=1 SV=2
P53894	CBK1 (P53894)	0.104707	0.0306297	871340	1.07768e+06	1.23681	Serine/threonine-protein kinase CBK1 OS=Saccharomyces cerevisiae (strain ATCC 204508 / S288c) GN=CBK1 PE=1 SV=1
P30624	FAA1 (P30624)	0.107713	0.0314064	1.38176e+07	1.70792e+07	1.23604	Long-chain-fatty-acid--CoA ligase 1 OS=Saccharomyces cerevisiae (strain ATCC 204508 / S288c) GN=FAA1 PE=1 SV=1
P25087	ERG6 (P25087)	0.00573315	0.00254515	2.18742e+07	2.70326e+07	1.23582	Sterol 24-C-methyltransferase OS=Saccharomyces cerevisiae (strain ATCC 204508 / S288c) GN=ERG6 PE=1 SV=4
P22470	SAN1 (P22470)	0.552132	0.123169	565940	699216	1.2355	Protein SAN1 OS=Saccharomyces cerevisiae (strain ATCC 204508 / S288c) GN=SAN1 PE=1 SV=1
P17555	SRV2 (P17555)	0.00109956	0.000626059	2.83158e+07	3.49698e+07	1.23499	Adenylyl cyclase-associated protein OS=Saccharomyces cerevisiae (strain ATCC 204508 / S288c) GN=SRV2 PE=1 SV=1
Q06708	VAC14 (Q06708)	0.345892	0.0836561	230117	284140	1.23476	Vacuole morphology and inheritance protein 14 OS=Saccharomyces cerevisiae (strain ATCC 204508 / S288c) GN=VAC14 PE=1 SV=1
Q04279	YMR086W (Q04279)	0.00906777	0.00378915	953431	1.17685e+06	1.23433	Eisosome protein SEG1 OS=Saccharomyces cerevisiae (strain ATCC 204508 / S288c) GN=SEG1 PE=1 SV=1
Q06685	VIP1 (Q06685)	0.00780988	0.00332161	2.27607e+06	2.80516e+06	1.23246	Inositol hexakisphosphate and diphosphoinositol-pentakisphosphate kinase OS=Saccharomyces cerevisiae (strain ATCC 204508 / S288c) GN=VIP1 PE=1 SV=1
P39940	RSP5 (P39940)	0.000454635	0.000293021	5.87404e+06	7.23918e+06	1.2324	E3 ubiquitin-protein ligase RSP5 OS=Saccharomyces cerevisiae (strain ATCC 204508 / S288c) GN=RSP5 PE=1 SV=1
P17442	PHO81 (P17442)	0.00577454	0.00255843	1.72023e+06	2.11968e+06	1.23221	Phosphate system positive regulatory protein PHO81 OS=Saccharomyces cerevisiae (strain ATCC 204508 / S288c) GN=PHO81 PE=1 SV=2
P40561	SGN1 (P40561)	0.00643559	0.00280036	1.08816e+06	1.34081e+06	1.23219	RNA-binding protein SGN1 OS=Saccharomyces cerevisiae (strain ATCC 204508 / S288c) GN=SGN1 PE=1 SV=1
Q07830	GPI13 (Q07830)	0.146035	0.0407419	756843	931878	1.23127	GPI ethanolamine phosphate transferase 3 OS=Saccharomyces cerevisiae (strain ATCC 204508 / S288c) GN=GPI13 PE=1 SV=1
P38797	PTC7 (P38797)	0.0782796	0.0240781	829963	1.0213e+06	1.23054	Protein phosphatase 2C homolog 7, mitochondrial OS=Saccharomyces cerevisiae (strain ATCC 204508 / S288c) GN=PTC7 PE=1 SV=2
Q03088	SVL3 (Q03088)	0.00269953	0.00133933	2.21216e+06	2.72113e+06	1.23008	Styryl dye vacuolar localization protein 3 OS=Saccharomyces cerevisiae (strain ATCC 204508 / S288c) GN=SVL3 PE=1 SV=1
P25365	SED4 (P25365)	0.35343	0.0852374	1.23613e+06	1.52041e+06	1.22998	Putative guanine nucleotide-exchange factor SED4 OS=Saccharomyces cerevisiae (strain ATCC 204508 / S288c) GN=SED4 PE=1 SV=1
P48837	NUP57 (P48837)	0.217763	0.0567091	930746	1.14305e+06	1.2281	Nucleoporin NUP57 OS=Saccharomyces cerevisiae (strain ATCC 204508 / S288c) GN=NUP57 PE=1 SV=1
P38903	RTS1 (P38903)	0.00350621	0.0016632	761364	934922	1.22796	Serine/threonine-protein phosphatase 2A 56 kDa regulatory subunit delta isoform OS=Saccharomyces cerevisiae (strain ATCC 204508 / S288c) GN=RTS1 PE=1 SV=2
P06100	CDC36 (P06100)	0.0478717	0.0156856	2.19158e+06	2.69101e+06	1.22789	General negative regulator of transcription subunit 2 OS=Saccharomyces cerevisiae (strain ATCC 204508 / S288c) GN=CDC36 PE=1 SV=1
P38713	OSH3 (P38713)	0.113695	0.0328709	723511	888257	1.2277	Oxysterol-binding protein homolog 3 OS=Saccharomyces cerevisiae (strain ATCC 204508 / S288c) GN=OSH3 PE=1 SV=1
P06103	PRT1 (P06103)	0.00607226	0.00267264	1.86027e+07	2.28364e+07	1.22759	Eukaryotic translation initiation factor 3 subunit B OS=Saccharomyces cerevisiae (strain ATCC 204508 / S288c) GN=PRT1 PE=1 SV=1
P19263	RGR1 (P19263)	0.0108056	0.00443228	474961	582800	1.22705	Mediator of RNA polymerase II transcription subunit 14 OS=Saccharomyces cerevisiae (strain ATCC 204508 / S288c) GN=RGR1 PE=1 SV=2
P46956	PHO86 (P46956)	0.0608105	0.0193544	4.53481e+06	5.56408e+06	1.22697	Inorganic phosphate transporter PHO86 OS=Saccharomyces cerevisiae (strain ATCC 204508 / S288c) GN=PHO86 PE=1 SV=1
Q08199	SIL1 (Q08199)	0.0721138	0.0223771	1.31878e+06	1.61782e+06	1.22676	Nucleotide exchange factor SIL1 OS=Saccharomyces cerevisiae (strain ATCC 204508 / S288c) GN=SIL1 PE=1 SV=1
P32367	TFC1 (P32367)	0.000267784	0.000186227	344008	421855	1.2263	Transcription factor tau 95 kDa subunit OS=Saccharomyces cerevisiae (strain ATCC 204508 / S288c) GN=TFC1 PE=1 SV=1
Q00402	NUM1 (Q00402)	0.0134171	0.00533346	4.50948e+06	5.5292e+06	1.22613	Nuclear migration protein NUM1 OS=Saccharomyces cerevisiae (strain ATCC 204508 / S288c) GN=NUM1 PE=1 SV=2
P38682	GLO3 (P38682)	0.128748	0.0366216	5.94262e+06	7.28267e+06	1.2255	ADP-ribosylation factor GTPase-activating protein GLO3 OS=Saccharomyces cerevisiae (strain ATCC 204508 / S288c) GN=GLO3 PE=1 SV=1
P53198	ERP6 (P53198)	0.556537	0.123986	286426	350723	1.22448	Protein ERP6 OS=Saccharomyces cerevisiae (strain ATCC 204508 / S288c) GN=ERP6 PE=1 SV=1
Q92331	VPS5 (Q92331)	0.00142909	0.000781389	1.4832e+06	1.81614e+06	1.22448	Vacuolar protein sorting-associated protein 5 OS=Saccharomyces cerevisiae (strain ATCC 204508 / S288c) GN=VPS5 PE=1 SV=1
Q99383	HRP1 (Q99383)	0.0477039	0.0156443	7.44665e+06	9.11512e+06	1.22406	Nuclear polyadenylated RNA-binding protein 4 OS=Saccharomyces cerevisiae (strain ATCC 204508 / S288c) GN=HRP1 PE=1 SV=1
P40016	RPN3 (P40016)	0.328422	0.0801597	5.20643e+06	6.37096e+06	1.22367	26S proteasome regulatory subunit RPN3 OS=Saccharomyces cerevisiae (strain ATCC 204508 / S288c) GN=RPN3 PE=1 SV=5
P15367	SEC11 (P15367)	0.0467448	0.015375	1.41747e+06	1.73417e+06	1.22342	Signal peptidase complex catalytic subunit SEC11 OS=Saccharomyces cerevisiae (strain ATCC 204508 / S288c) GN=SEC11 PE=1 SV=2
P12904	SNF4 (P12904)	0.00319125	0.00153817	2.00127e+06	2.4474e+06	1.22292	5'-AMP-activated protein kinase subunit gamma OS=Saccharomyces cerevisiae (strain ATCC 204508 / S288c) GN=SNF4 PE=1 SV=1
P33299	RPT1 (P33299)	0.195638	0.0517132	4.90878e+06	6.0004e+06	1.22238	26S protease regulatory subunit 7 homolog OS=Saccharomyces cerevisiae (strain ATCC 204508 / S288c) GN=RPT1 PE=1 SV=1
Q03281	HEH2 (Q03281)	0.0264157	0.00947074	414311	506434	1.22235	Inner nuclear membrane protein HEH2 OS=Saccharomyces cerevisiae (strain ATCC 204508 / S288c) GN=HEH2 PE=1 SV=1
O13563	RPN13 (O13563)	0.10088	0.0295749	3.44771e+06	4.20868e+06	1.22072	26S proteasome regulatory subunit RPN13 OS=Saccharomyces cerevisiae (strain ATCC 204508 / S288c) GN=RPN13 PE=1 SV=1
P35723	YET1 (P35723)	1.11116e-05	1.28835e-05	6.77361e+06	8.26699e+06	1.22047	Endoplasmic reticulum transmembrane protein 1 OS=Saccharomyces cerevisiae (strain ATCC 204508 / S288c) GN=YET1 PE=1 SV=2
P40037	HMF1 (P40037)	0.00348621	0.00165647	1.25669e+07	1.53347e+07	1.22024	Protein HMF1 OS=Saccharomyces cerevisiae (strain ATCC 204508 / S288c) GN=HMF1 PE=1 SV=1
P52918	MSN5 (P52918)	0.00019995	0.000145725	638237	778681	1.22005	Protein MSN5 OS=Saccharomyces cerevisiae (strain ATCC 204508 / S288c) GN=MSN5 PE=1 SV=1
P22137	CHC1 (P22137)	1.13339e-06	2.18516e-06	1.40103e+07	1.70817e+07	1.21922	Clathrin heavy chain OS=Saccharomyces cerevisiae (strain ATCC 204508 / S288c) GN=CHC1 PE=1 SV=1
P25654	YCR090C (P25654)	0.0457008	0.0150687	922751	1.1247e+06	1.21886	UPF0587 protein YCR090C OS=Saccharomyces cerevisiae (strain ATCC 204508 / S288c) GN=YCR090C PE=1 SV=1
P38755	OSH7 (P38755)	9.48878e-05	7.87606e-05	2.12191e+06	2.58533e+06	1.2184	Oxysterol-binding protein homolog 7 OS=Saccharomyces cerevisiae (strain ATCC 204508 / S288c) GN=OSH7 PE=1 SV=1
P53172	SDS23 (P53172)	0.000866124	0.00051171	2.98451e+06	3.6348e+06	1.21789	Protein SDS23 OS=Saccharomyces cerevisiae (strain ATCC 204508 / S288c) GN=SDS23 PE=1 SV=2
P40302	PRE5 (P40302)	0.017287	0.00663521	8.53181e+06	1.03897e+07	1.21777	Proteasome subunit alpha type-6 OS=Saccharomyces cerevisiae (strain ATCC 204508 / S288c) GN=PRE5 PE=1 SV=1
P53140	RMD9 (P53140)	0.0145812	0.00573785	556926	677850	1.21713	Protein RMD9, mitochondrial OS=Saccharomyces cerevisiae (strain ATCC 204508 / S288c) GN=RMD9 PE=1 SV=1
P02557	TUB2 (P02557)	0.05262	0.0170883	2.69994e+07	3.28582e+07	1.217	Tubulin beta chain OS=Saccharomyces cerevisiae (strain ATCC 204508 / S288c) GN=TUB2 PE=1 SV=2
Q08977	YPL260W (Q08977)	0.0184683	0.00701186	2.55898e+06	3.1137e+06	1.21678	UPF0662 protein YPL260W OS=Saccharomyces cerevisiae (strain ATCC 204508 / S288c) GN=YPL260W PE=1 SV=1
P51534	SHE4 (P51534)	0.0222599	0.00822314	689796	839008	1.21631	SWI5-dependent HO expression protein 4 OS=Saccharomyces cerevisiae (strain ATCC 204508 / S288c) GN=SHE4 PE=1 SV=2
Q06146	YLR257W (Q06146)	0.00165225	0.000884301	4.53282e+06	5.51086e+06	1.21577	Uncharacterized protein YLR257W OS=Saccharomyces cerevisiae (strain ATCC 204508 / S288c) GN=YLR257W PE=1 SV=1
P54791	ORC4 (P54791)	0.607875	0.133627	366418	445280	1.21522	Origin recognition complex subunit 4 OS=Saccharomyces cerevisiae (strain ATCC 204508 / S288c) GN=ORC4 PE=1 SV=1
P14832	CPR1 (P14832)	6.95519e-06	8.77943e-06	1.00966e+08	1.22668e+08	1.21494	Peptidyl-prolyl cis-trans isomerase OS=Saccharomyces cerevisiae (strain ATCC 204508 / S288c) GN=CPR1 PE=1 SV=3
Q05854	YLR278C (Q05854)	0.23874	0.0613362	329651	400499	1.21492	Uncharacterized transcriptional regulatory protein YLR278C OS=Saccharomyces cerevisiae (strain ATCC 204508 / S288c) GN=YLR278C PE=1 SV=1
P19097	FAS2 (P19097)	0.00515693	0.0023264	1.07553e+08	1.3058e+08	1.2141	Fatty acid synthase subunit alpha OS=Saccharomyces cerevisiae (strain ATCC 204508 / S288c) GN=FAS2 PE=1 SV=2
P48015	GCV1 (P48015)	0.224867	0.0582113	4.01989e+06	4.8802e+06	1.21401	Aminomethyltransferase, mitochondrial OS=Saccharomyces cerevisiae (strain ATCC 204508 / S288c) GN=GCV1 PE=1 SV=2
P38080	AKL1 (P38080)	0.00724945	0.00310696	1.53343e+06	1.86141e+06	1.21388	Serine/threonine-protein kinase AKL1 OS=Saccharomyces cerevisiae (strain ATCC 204508 / S288c) GN=AKL1 PE=1 SV=1
P25367	RNQ1 (P25367)	0.000824522	0.000491635	9.64151e+06	1.17013e+07	1.21363	[PIN+] prion protein RNQ1 OS=Saccharomyces cerevisiae (strain ATCC 204508 / S288c) GN=RNQ1 PE=1 SV=2
P39743	RVS167 (P39743)	0.00252927	0.0012713	8.10002e+06	9.82993e+06	1.21357	Reduced viability upon starvation protein 167 OS=Saccharomyces cerevisiae (strain ATCC 204508 / S288c) GN=RVS167 PE=1 SV=1
P15274	AMD1 (P15274)	0.00831721	0.00350618	2.74979e+06	3.33542e+06	1.21297	AMP deaminase OS=Saccharomyces cerevisiae (strain ATCC 204508 / S288c) GN=AMD1 PE=1 SV=2
P32657	CHD1 (P32657)	0.000665424	0.000409546	1.30784e+06	1.58566e+06	1.21242	Chromo domain-containing protein 1 OS=Saccharomyces cerevisiae (strain ATCC 204508 / S288c) GN=CHD1 PE=1 SV=1
P47045	TIM54 (P47045)	0.289271	0.0720497	788416	955505	1.21193	Mitochondrial import inner membrane translocase subunit TIM54 OS=Saccharomyces cerevisiae (strain ATCC 204508 / S288c) GN=TIM54 PE=1 SV=1
P38993	FET3 (P38993)	0.358979	0.0864199	1.60039e+07	1.93702e+07	1.21034	Iron transport multicopper oxidase FET3 OS=Saccharomyces cerevisiae (strain ATCC 204508 / S288c) GN=FET3 PE=1 SV=2
P05374	CHO2 (P05374)	0.0110617	0.00452071	3.7176e+06	4.49408e+06	1.20886	Phosphatidylethanolamine N-methyltransferase OS=Saccharomyces cerevisiae (strain ATCC 204508 / S288c) GN=CHO2 PE=1 SV=1
P38288	TOS1 (P38288)	0.148008	0.0411379	4.64098e+06	5.60847e+06	1.20847	Protein TOS1 OS=Saccharomyces cerevisiae (strain ATCC 204508 / S288c) GN=TOS1 PE=1 SV=1
P32266	MGM1 (P32266)	0.159594	0.0438122	269794	326029	1.20844	Dynamin-like GTPase MGM1, mitochondrial OS=Saccharomyces cerevisiae (strain ATCC 204508 / S288c) GN=MGM1 PE=1 SV=3
P25296	CNB1 (P25296)	0.494678	0.112758	328955	397450	1.20822	Calcineurin subunit B OS=Saccharomyces cerevisiae (strain ATCC 204508 / S288c) GN=CNB1 PE=1 SV=3
P23542	AAT2 (P23542)	0.00136443	0.000753153	2.29642e+07	2.7731e+07	1.20757	Aspartate aminotransferase, cytoplasmic OS=Saccharomyces cerevisiae (strain ATCC 204508 / S288c) GN=AAT2 PE=1 SV=3
P49687	NUP145 (P49687)	0.208554	0.0546514	997717	1.20473e+06	1.20749	Nucleoporin NUP145 OS=Saccharomyces cerevisiae (strain ATCC 204508 / S288c) GN=NUP145 PE=1 SV=1
P36000	APL2 (P36000)	0.0167351	0.00645674	548755	662598	1.20746	AP-1 complex subunit beta-1 OS=Saccharomyces cerevisiae (strain ATCC 204508 / S288c) GN=APL2 PE=1 SV=1
Q04533	YML082W (Q04533)	0.231832	0.0597912	212982	257156	1.20741	Putative cystathionine gamma-synthase YML082W OS=Saccharomyces cerevisiae (strain ATCC 204508 / S288c) GN=YML082W PE=1 SV=1
P38687	SRP68 (P38687)	0.0839943	0.0253694	3.7576e+06	4.53621e+06	1.20721	Signal recognition particle subunit SRP68 OS=Saccharomyces cerevisiae (strain ATCC 204508 / S288c) GN=SRP68 PE=1 SV=1
P07285	TRP4 (P07285)	0.00947944	0.00394885	918729	1.10864e+06	1.20671	Anthranilate phosphoribosyltransferase OS=Saccharomyces cerevisiae (strain ATCC 204508 / S288c) GN=TRP4 PE=1 SV=1
Q03048	COF1 (Q03048)	3.47749e-05	3.35712e-05	7.11178e+07	8.58058e+07	1.20653	Cofilin OS=Saccharomyces cerevisiae (strain ATCC 204508 / S288c) GN=COF1 PE=1 SV=1
P48606	RBL2 (P48606)	0.172623	0.0467746	1.54058e+06	1.85844e+06	1.20632	Tubulin-specific chaperone A OS=Saccharomyces cerevisiae (strain ATCC 204508 / S288c) GN=RBL2 PE=1 SV=1
P32774	TOA2 (P32774)	0.0189989	0.00718107	2.29006e+06	2.76002e+06	1.20522	Transcription initiation factor IIA subunit 2 OS=Saccharomyces cerevisiae (strain ATCC 204508 / S288c) GN=TOA2 PE=1 SV=1
P40477	NUP159 (P40477)	0.00814106	0.00344277	1.5407e+06	1.85583e+06	1.20454	Nucleoporin NUP159 OS=Saccharomyces cerevisiae (strain ATCC 204508 / S288c) GN=NUP159 PE=1 SV=1
P32478	HSP150 (P32478)	0.00574735	0.00254976	1.47839e+07	1.77972e+07	1.20382	Cell wall mannoprotein HSP150 OS=Saccharomyces cerevisiae (strain ATCC 204508 / S288c) GN=HSP150 PE=1 SV=2
P20604	SIT4 (P20604)	0.0569824	0.0183014	1.50627e+06	1.81136e+06	1.20254	Serine/threonine-protein phosphatase PP1-1 OS=Saccharomyces cerevisiae (strain ATCC 204508 / S288c) GN=SIT4 PE=1 SV=1
P17967	PDI1 (P17967)	0.00324273	0.00155737	6.77378e+07	8.14448e+07	1.20235	Protein disulfide-isomerase OS=Saccharomyces cerevisiae (strain ATCC 204508 / S288c) GN=PDI1 PE=1 SV=2
P12868	PEP5 (P12868)	0.0587562	0.0188169	267968	321957	1.20148	E3 ubiquitin-protein ligase PEP5 OS=Saccharomyces cerevisiae (strain ATCC 204508 / S288c) GN=PEP5 PE=1 SV=2
P16622	HEM15 (P16622)	0.0883901	0.02647	5.09912e+06	6.12285e+06	1.20077	Ferrochelatase, mitochondrial OS=Saccharomyces cerevisiae (strain ATCC 204508 / S288c) GN=HEM15 PE=1 SV=1
P20606	SAR1 (P20606)	0.0756018	0.0233403	2.90345e+07	3.48079e+07	1.19885	Small COPII coat GTPase SAR1 OS=Saccharomyces cerevisiae (strain ATCC 204508 / S288c) GN=SAR1 PE=1 SV=1
Q03656	SKY1 (Q03656)	0.350801	0.0846951	851034	1.01957e+06	1.19804	Serine/threonine-protein kinase SKY1 OS=Saccharomyces cerevisiae (strain ATCC 204508 / S288c) GN=SKY1 PE=1 SV=1
P29952	PMI40 (P29952)	0.355467	0.0856362	1.85974e+07	2.22763e+07	1.19782	Mannose-6-phosphate isomerase OS=Saccharomyces cerevisiae (strain ATCC 204508 / S288c) GN=PMI40 PE=1 SV=4
P39996	GTT3 (P39996)	0.0672675	0.0212177	885362	1.06045e+06	1.19776	Glutathione transferase 3 OS=Saccharomyces cerevisiae (strain ATCC 204508 / S288c) GN=GTT3 PE=1 SV=1
Q03034	FDC1 (Q03034)	0.418623	0.0982334	881568	1.05579e+06	1.19763	Ferulic acid decarboxylase 1 OS=Saccharomyces cerevisiae (strain ATCC 204508 / S288c) GN=FDC1 PE=1 SV=1
P35999	OCT1 (P35999)	0.0242422	0.00881428	60677.7	72612.7	1.1967	Mitochondrial intermediate peptidase OS=Saccharomyces cerevisiae (strain ATCC 204508 / S288c) GN=OCT1 PE=1 SV=2
P32319	PEP1 (P32319)	0.00270495	0.00134047	2.42207e+06	2.89308e+06	1.19446	Vacuolar protein sorting/targeting protein VPS10 OS=Saccharomyces cerevisiae (strain ATCC 204508 / S288c) GN=PEP1 PE=1 SV=1
Q12114	CHS5 (Q12114)	0.00341945	0.00163287	6.46984e+06	7.72441e+06	1.19391	Chitin biosynthesis protein CHS5 OS=Saccharomyces cerevisiae (strain ATCC 204508 / S288c) GN=CHS5 PE=1 SV=1
P33202	UFD4 (P33202)	0.0945478	0.0279635	557575	664938	1.19255	Ubiquitin fusion degradation protein 4 OS=Saccharomyces cerevisiae (strain ATCC 204508 / S288c) GN=UFD4 PE=1 SV=1
P38825	TOM71 (P38825)	0.218876	0.0569326	783852	934458	1.19214	Protein TOM71 OS=Saccharomyces cerevisiae (strain ATCC 204508 / S288c) GN=TOM71 PE=1 SV=1
P39929	SNF7 (P39929)	0.185728	0.0496223	2.38119e+06	2.83702e+06	1.19143	Vacuolar-sorting protein SNF7 OS=Saccharomyces cerevisiae (strain ATCC 204508 / S288c) GN=SNF7 PE=1 SV=1
P53220	TIM21 (P53220)	0.0763576	0.0235519	825644	983377	1.19104	Mitochondrial import inner membrane translocase subunit TIM21 OS=Saccharomyces cerevisiae (strain ATCC 204508 / S288c) GN=TIM21 PE=1 SV=1
P28273	OXP1 (P28273)	0.0504846	0.0164434	1.31475e+06	1.5644e+06	1.18989	5-oxoprolinase OS=Saccharomyces cerevisiae (strain ATCC 204508 / S288c) GN=OXP1 PE=1 SV=2
P89105	CTR9 (P89105)	0.0341039	0.0118034	2.10389e+06	2.50334e+06	1.18986	RNA polymerase-associated protein CTR9 OS=Saccharomyces cerevisiae (strain ATCC 204508 / S288c) GN=CTR9 PE=1 SV=3
P53924	DMA2 (P53924)	0.00411151	0.0019115	667878	794667	1.18984	E3 ubiquitin-protein ligase DMA2 OS=Saccharomyces cerevisiae (strain ATCC 204508 / S288c) GN=DMA2 PE=1 SV=1
P35195	ECM15 (P35195)	0.691219	0.148692	482381	573892	1.18971	UPF0045 protein ECM15 OS=Saccharomyces cerevisiae (strain ATCC 204508 / S288c) GN=ECM15 PE=1 SV=1
Q12028	APL4 (Q12028)	0.00270064	0.00133933	1.10219e+06	1.30957e+06	1.18815	AP-1 complex subunit gamma-1 OS=Saccharomyces cerevisiae (strain ATCC 204508 / S288c) GN=APL4 PE=1 SV=1
P22517	CMK2 (P22517)	0.000883493	0.000520305	1.02322e+06	1.21487e+06	1.1873	Calcium/calmodulin-dependent protein kinase II OS=Saccharomyces cerevisiae (strain ATCC 204508 / S288c) GN=CMK2 PE=1 SV=2
P38716	YHR112C (P38716)	0.15654	0.0431508	536947	636681	1.18574	Uncharacterized trans-sulfuration enzyme YHR112C OS=Saccharomyces cerevisiae (strain ATCC 204508 / S288c) GN=YHR112C PE=1 SV=1
Q06103	RPN7 (Q06103)	0.00874884	0.00366504	7.01815e+06	8.32011e+06	1.18551	26S proteasome regulatory subunit RPN7 OS=Saccharomyces cerevisiae (strain ATCC 204508 / S288c) GN=RPN7 PE=1 SV=3
P34110	VPS35 (P34110)	0.0209206	0.00780599	530157	628499	1.1855	Vacuolar protein sorting-associated protein 35 OS=Saccharomyces cerevisiae (strain ATCC 204508 / S288c) GN=VPS35 PE=1 SV=2
P38970	HAL5 (P38970)	2.89707e-08	1.4909e-07	306118	362769	1.18506	Serine/threonine-protein kinase HAL5 OS=Saccharomyces cerevisiae (strain ATCC 204508 / S288c) GN=HAL5 PE=1 SV=2
P48562	CLA4 (P48562)	0.703219	0.150596	1.07922e+06	1.27781e+06	1.18402	Serine/threonine-protein kinase CLA4 OS=Saccharomyces cerevisiae (strain ATCC 204508 / S288c) GN=CLA4 PE=1 SV=1
P41697	BUD6 (P41697)	0.0230469	0.00846247	377877	447259	1.18361	Bud site selection protein 6 OS=Saccharomyces cerevisiae (strain ATCC 204508 / S288c) GN=BUD6 PE=1 SV=1
P38809	YHR097C (P38809)	0.00278408	0.0013746	1.10068e+06	1.30122e+06	1.1822	Uncharacterized protein YHR097C OS=Saccharomyces cerevisiae (strain ATCC 204508 / S288c) GN=YHR097C PE=1 SV=1
P38985	SRP14 (P38985)	0.607997	0.133627	2.69219e+06	3.18195e+06	1.18192	Signal recognition particle subunit SRP14 OS=Saccharomyces cerevisiae (strain ATCC 204508 / S288c) GN=SRP14 PE=1 SV=1
Q06252	YLR179C (Q06252)	0.224924	0.0582113	1.37853e+07	1.62883e+07	1.18157	Uncharacterized protein YLR179C OS=Saccharomyces cerevisiae (strain ATCC 204508 / S288c) GN=YLR179C PE=1 SV=1
Q02199	NUP49 (Q02199)	0.308614	0.076215	1.41837e+06	1.67545e+06	1.18125	Nucleoporin NUP49/NSP49 OS=Saccharomyces cerevisiae (strain ATCC 204508 / S288c) GN=NUP49 PE=1 SV=1
P23724	PRE7 (P23724)	0.0275898	0.00982327	8.50643e+06	1.00453e+07	1.1809	Proteasome subunit beta type-6 OS=Saccharomyces cerevisiae (strain ATCC 204508 / S288c) GN=PRE7 PE=1 SV=1
P34077	NIC96 (P34077)	0.190058	0.0505369	908400	1.07252e+06	1.18066	Nucleoporin NIC96 OS=Saccharomyces cerevisiae (strain ATCC 204508 / S288c) GN=NIC96 PE=1 SV=2
P52553	YKE2 (P52553)	0.15548	0.0429078	3.87414e+06	4.57371e+06	1.18057	Prefoldin subunit 6 OS=Saccharomyces cerevisiae (strain ATCC 204508 / S288c) GN=YKE2 PE=1 SV=1
P41318	LST8 (P41318)	0.642262	0.139824	226352	266888	1.17908	Target of rapamycin complex subunit LST8 OS=Saccharomyces cerevisiae (strain ATCC 204508 / S288c) GN=LST8 PE=1 SV=1
P38968	SEC31 (P38968)	0.0170197	0.00654388	1.34468e+07	1.58547e+07	1.17907	Protein transport protein SEC31 OS=Saccharomyces cerevisiae (strain ATCC 204508 / S288c) GN=SEC31 PE=1 SV=3
P38749	YAP3 (P38749)	0.692226	0.148813	114641	135134	1.17876	AP-1-like transcription factor YAP3 OS=Saccharomyces cerevisiae (strain ATCC 204508 / S288c) GN=YAP3 PE=1 SV=1
P32379	PUP2 (P32379)	0.0390938	0.0131959	1.22905e+07	1.44795e+07	1.1781	Proteasome subunit alpha type-5 OS=Saccharomyces cerevisiae (strain ATCC 204508 / S288c) GN=PUP2 PE=1 SV=2
Q08732	HRK1 (Q08732)	0.000818663	0.000488577	1.09583e+06	1.29077e+06	1.1779	Serine/threonine-protein kinase HRK1 OS=Saccharomyces cerevisiae (strain ATCC 204508 / S288c) GN=HRK1 PE=1 SV=1
P22141	PRE1 (P22141)	0.778157	0.164122	1.00755e+07	1.18637e+07	1.17748	Proteasome subunit beta type-4 OS=Saccharomyces cerevisiae (strain ATCC 204508 / S288c) GN=PRE1 PE=1 SV=2
P38814	SBE22 (P38814)	0.431232	0.100669	177556	208939	1.17675	Protein SBE22 OS=Saccharomyces cerevisiae (strain ATCC 204508 / S288c) GN=SBE22 PE=1 SV=1
P38428	CUE1 (P38428)	0.259074	0.0657274	1.07722e+06	1.26697e+06	1.17615	Coupling of ubiquitin conjugation to ER degradation protein 1 OS=Saccharomyces cerevisiae (strain ATCC 204508 / S288c) GN=CUE1 PE=1 SV=2
Q07657	SHS1 (Q07657)	0.327386	0.0799946	2.65594e+06	3.12304e+06	1.17587	Seventh homolog of septin 1 OS=Saccharomyces cerevisiae (strain ATCC 204508 / S288c) GN=SHS1 PE=1 SV=1
P23201	SPA2 (P23201)	0.136883	0.0384936	1.52827e+06	1.79697e+06	1.17582	Protein SPA2 OS=Saccharomyces cerevisiae (strain ATCC 204508 / S288c) GN=SPA2 PE=1 SV=1
P53599	SSK2 (P53599)	0.0748237	0.0231321	29064.9	34174	1.17578	MAP kinase kinase kinase SSK2 OS=Saccharomyces cerevisiae (strain ATCC 204508 / S288c) GN=SSK2 PE=1 SV=1
P21734	UBC1 (P21734)	0.0451833	0.0149201	8.57237e+06	1.00792e+07	1.17578	Ubiquitin-conjugating enzyme E2 1 OS=Saccharomyces cerevisiae (strain ATCC 204508 / S288c) GN=UBC1 PE=1 SV=1
P32875	LIP5 (P32875)	0.553586	0.123411	815553	958478	1.17525	Lipoyl synthase, mitochondrial OS=Saccharomyces cerevisiae (strain ATCC 204508 / S288c) GN=LIP5 PE=1 SV=1
Q99258	RIB3 (Q99258)	0.00201657	0.00104763	6.84404e+06	8.04288e+06	1.17516	3,4-dihydroxy-2-butanone 4-phosphate synthase OS=Saccharomyces cerevisiae (strain ATCC 204508 / S288c) GN=RIB3 PE=1 SV=1
P18480	SNF5 (P18480)	0.542779	0.121406	254939	299582	1.17511	SWI/SNF chromatin-remodeling complex subunit SNF5 OS=Saccharomyces cerevisiae (strain ATCC 204508 / S288c) GN=SNF5 PE=1 SV=3
P23639	PRE8 (P23639)	9.70102e-05	8.01535e-05	8.85223e+06	1.0402e+07	1.17507	Proteasome subunit alpha type-2 OS=Saccharomyces cerevisiae (strain ATCC 204508 / S288c) GN=PRE8 PE=1 SV=1
P43616	DUG1 (P43616)	0.0278858	0.00991283	3.92846e+07	4.61436e+07	1.1746	Cys-Gly metallodipeptidase DUG1 OS=Saccharomyces cerevisiae (strain ATCC 204508 / S288c) GN=DUG1 PE=1 SV=1
P38321	YBR225W (P38321)	0.0122312	0.00492645	23718.2	27840.6	1.17381	Uncharacterized protein YBR225W OS=Saccharomyces cerevisiae (strain ATCC 204508 / S288c) GN=YBR225W PE=1 SV=1
Q01590	SED5 (Q01590)	0.0175291	0.00670892	995340	1.16826e+06	1.17373	Integral membrane protein SED5 OS=Saccharomyces cerevisiae (strain ATCC 204508 / S288c) GN=SED5 PE=1 SV=1
Q05584	GLO2 (Q05584)	2.95868e-06	4.50529e-06	2.72961e+06	3.20349e+06	1.17361	Hydroxyacylglutathione hydrolase, cytoplasmic isozyme OS=Saccharomyces cerevisiae (strain ATCC 204508 / S288c) GN=GLO2 PE=1 SV=1
P34223	SHP1 (P34223)	0.0505737	0.0164642	9.04753e+06	1.06176e+07	1.17354	UBX domain-containing protein 1 OS=Saccharomyces cerevisiae (strain ATCC 204508 / S288c) GN=SHP1 PE=1 SV=1
P43596	IOC3 (P43596)	0.490419	0.112016	365328	428572	1.17312	ISWI one complex protein 3 OS=Saccharomyces cerevisiae (strain ATCC 204508 / S288c) GN=IOC3 PE=1 SV=1
P40368	NUP82 (P40368)	0.130174	0.0369013	593664	694768	1.17031	Nucleoporin NUP82 OS=Saccharomyces cerevisiae (strain ATCC 204508 / S288c) GN=NUP82 PE=1 SV=2
P53334	SCW4 (P53334)	0.0176049	0.00673404	1.30267e+07	1.52451e+07	1.1703	Probable family 17 glucosidase SCW4 OS=Saccharomyces cerevisiae (strain ATCC 204508 / S288c) GN=SCW4 PE=1 SV=1
Q04439	MYO5 (Q04439)	0.000114759	9.19458e-05	1.69242e+06	1.9784e+06	1.16898	Myosin-5 OS=Saccharomyces cerevisiae (strain ATCC 204508 / S288c) GN=MYO5 PE=1 SV=1
P38817	GGA2 (P38817)	0.318763	0.0782878	5.03635e+06	5.88703e+06	1.16891	ADP-ribosylation factor-binding protein GGA2 OS=Saccharomyces cerevisiae (strain ATCC 204508 / S288c) GN=GGA2 PE=1 SV=1
P30657	PRE4 (P30657)	0.00471474	0.00215669	1.14611e+07	1.33786e+07	1.1673	Proteasome subunit beta type-7 OS=Saccharomyces cerevisiae (strain ATCC 204508 / S288c) GN=PRE4 PE=1 SV=1
P32419	MDH3 (P32419)	0.000763852	0.000458444	4.03952e+06	4.7124e+06	1.16657	Malate dehydrogenase, peroxisomal OS=Saccharomyces cerevisiae (strain ATCC 204508 / S288c) GN=MDH3 PE=1 SV=3
P38348	HSM3 (P38348)	0.0125521	0.00502545	458423	534274	1.16546	DNA mismatch repair protein HSM3 OS=Saccharomyces cerevisiae (strain ATCC 204508 / S288c) GN=HSM3 PE=1 SV=1
Q06697	CDC73 (Q06697)	0.455522	0.10534	583755	680249	1.1653	Cell division control protein 73 OS=Saccharomyces cerevisiae (strain ATCC 204508 / S288c) GN=CDC73 PE=1 SV=1
Q06580	MLC2 (Q06580)	0.155277	0.0428734	593753	691536	1.16469	Myosin light chain 2 OS=Saccharomyces cerevisiae (strain ATCC 204508 / S288c) GN=MLC2 PE=1 SV=1
P27999	RPB9 (P27999)	0.000602155	0.000374743	3.6713e+06	4.27274e+06	1.16382	DNA-directed RNA polymerase II subunit RPB9 OS=Saccharomyces cerevisiae (strain ATCC 204508 / S288c) GN=RPB9 PE=1 SV=1
P07149	FAS1 (P07149)	0.0342196	0.0118311	6.19091e+07	7.20146e+07	1.16323	Fatty acid synthase subunit beta OS=Saccharomyces cerevisiae (strain ATCC 204508 / S288c) GN=FAS1 PE=1 SV=2
P32468	CDC12 (P32468)	0.0539176	0.0174121	6.59512e+06	7.67069e+06	1.16309	Cell division control protein 12 OS=Saccharomyces cerevisiae (strain ATCC 204508 / S288c) GN=CDC12 PE=1 SV=1
P14907	NSP1 (P14907)	0.0833104	0.025254	6.63086e+06	7.70438e+06	1.1619	Nucleoporin NSP1 OS=Saccharomyces cerevisiae (strain ATCC 204508 / S288c) GN=NSP1 PE=1 SV=1
P27614	CPS1 (P27614)	0.0119314	0.00483065	3.1136e+06	3.61574e+06	1.16127	Carboxypeptidase S OS=Saccharomyces cerevisiae (strain ATCC 204508 / S288c) GN=CPS1 PE=1 SV=2
P37366	CCL1 (P37366)	0.527122	0.118538	595505	691258	1.16079	Cyclin CCL1 OS=Saccharomyces cerevisiae (strain ATCC 204508 / S288c) GN=CCL1 PE=1 SV=1
P11632	NHP6A (P11632)	0.0785971	0.0241203	8.71627e+06	1.01151e+07	1.16048	Non-histone chromosomal protein 6A OS=Saccharomyces cerevisiae (strain ATCC 204508 / S288c) GN=NHP6A PE=1 SV=1
Q12502	LDB19 (Q12502)	0.0758951	0.02342	493684	572799	1.16025	Protein LDB19 OS=Saccharomyces cerevisiae (strain ATCC 204508 / S288c) GN=LDB19 PE=1 SV=1
P39931	SSP120 (P39931)	0.0216663	0.00803205	2.59997e+06	3.01451e+06	1.15944	Protein SSP120 OS=Saccharomyces cerevisiae (strain ATCC 204508 / S288c) GN=SSP120 PE=1 SV=1
P27801	PEP3 (P27801)	0.0907416	0.027041	274470	318089	1.15892	Vacuolar membrane protein PEP3 OS=Saccharomyces cerevisiae (strain ATCC 204508 / S288c) GN=PEP3 PE=1 SV=1
P13663	HOM2 (P13663)	0.000930805	0.000544334	4.11442e+07	4.76635e+07	1.15845	Aspartate-semialdehyde dehydrogenase OS=Saccharomyces cerevisiae (strain ATCC 204508 / S288c) GN=HOM2 PE=1 SV=1
P38764	RPN1 (P38764)	0.284639	0.0710548	1.15302e+07	1.33553e+07	1.15829	26S proteasome regulatory subunit RPN1 OS=Saccharomyces cerevisiae (strain ATCC 204508 / S288c) GN=RPN1 PE=1 SV=3
Q02875	SYH1 (Q02875)	0.323666	0.0793172	1.26101e+06	1.4605e+06	1.1582	SMY2 homolog 2 OS=Saccharomyces cerevisiae (strain ATCC 204508 / S288c) GN=SYH1 PE=1 SV=1
P38703	LAG1 (P38703)	8.52786e-05	7.16738e-05	1.85071e+06	2.14241e+06	1.15762	Sphingosine N-acyltransferase LAG1 OS=Saccharomyces cerevisiae (strain ATCC 204508 / S288c) GN=LAG1 PE=1 SV=1
P38885	AIM46 (P38885)	0.00346876	0.00165199	822919	952086	1.15696	Altered inheritance of mitochondria protein 46, mitochondrial OS=Saccharomyces cerevisiae (strain ATCC 204508 / S288c) GN=AIM46 PE=1 SV=1
P53753	DSE4 (P53753)	0.000591999	0.000369453	293289	339264	1.15676	Endo-1,3(4)-beta-glucanase 1 OS=Saccharomyces cerevisiae (strain ATCC 204508 / S288c) GN=DSE4 PE=1 SV=1
Q12434	RDI1 (Q12434)	0.0341769	0.0118225	8.01982e+06	9.27416e+06	1.1564	Rho GDP-dissociation inhibitor OS=Saccharomyces cerevisiae (strain ATCC 204508 / S288c) GN=RDI1 PE=1 SV=1
Q06639	RSC3 (Q06639)	0.267146	0.0676214	1.01734e+06	1.17634e+06	1.15629	Chromatin structure-remodeling complex protein RSC3 OS=Saccharomyces cerevisiae (strain ATCC 204508 / S288c) GN=RSC3 PE=1 SV=1
P32263	PRO3 (P32263)	0.00787279	0.00334396	3.16161e+07	3.65566e+07	1.15627	Pyrroline-5-carboxylate reductase OS=Saccharomyces cerevisiae (strain ATCC 204508 / S288c) GN=PRO3 PE=1 SV=1
P33331	NTF2 (P33331)	0.17346	0.0469254	2.08893e+07	2.41516e+07	1.15617	Nuclear transport factor 2 OS=Saccharomyces cerevisiae (strain ATCC 204508 / S288c) GN=NTF2 PE=1 SV=2
P54783	ALO1 (P54783)	0.224762	0.0582113	7.27148e+06	8.39605e+06	1.15465	D-arabinono-1,4-lactone oxidase OS=Saccharomyces cerevisiae (strain ATCC 204508 / S288c) GN=ALO1 PE=1 SV=1
Q12329	HSP42 (Q12329)	1.33475e-10	4.69981e-09	1.39507e+06	1.61075e+06	1.1546	Heat shock protein 42 OS=Saccharomyces cerevisiae (strain ATCC 204508 / S288c) GN=HSP42 PE=1 SV=1
P22224	SEC15 (P22224)	0.0128333	0.00512573	696355	803787	1.15428	Exocyst complex component SEC15 OS=Saccharomyces cerevisiae (strain ATCC 204508 / S288c) GN=SEC15 PE=1 SV=2
P36015	YKT6 (P36015)	0.19573	0.0517164	6.51649e+06	7.52139e+06	1.15421	Synaptobrevin homolog YKT6 OS=Saccharomyces cerevisiae (strain ATCC 204508 / S288c) GN=YKT6 PE=1 SV=1
P29547	CAM1 (P29547)	0.000117723	9.35368e-05	2.73586e+07	3.15713e+07	1.15398	Elongation factor 1-gamma 1 OS=Saccharomyces cerevisiae (strain ATCC 204508 / S288c) GN=CAM1 PE=1 SV=2
P32803	EMP24 (P32803)	0.028908	0.0102381	9.2548e+06	1.06738e+07	1.15332	Endosomal protein P24B OS=Saccharomyces cerevisiae (strain ATCC 204508 / S288c) GN=EMP24 PE=1 SV=1
P40053	AIM9 (P40053)	0.00313145	0.0015148	4.6294e+06	5.3296e+06	1.15125	Altered inheritance of mitochondria protein 9, mitochondrial OS=Saccharomyces cerevisiae (strain ATCC 204508 / S288c) GN=AIM9 PE=1 SV=1
P43588	RPN11 (P43588)	0.00500745	0.0022743	5.62369e+06	6.47082e+06	1.15064	Ubiquitin carboxyl-terminal hydrolase RPN11 OS=Saccharomyces cerevisiae (strain ATCC 204508 / S288c) GN=RPN11 PE=1 SV=1
P53244	ART5 (P53244)	0.988083	0.200497	130062	149491	1.14938	Arrestin-related trafficking adapter 5 OS=Saccharomyces cerevisiae (strain ATCC 204508 / S288c) GN=ART5 PE=1 SV=1
P53075	SHE10 (P53075)	0.609044	0.133761	2.95257e+06	3.39279e+06	1.1491	Outer spore wall assembly protein SHE10 OS=Saccharomyces cerevisiae (strain ATCC 204508 / S288c) GN=SHE10 PE=1 SV=1
P32523	PRP19 (P32523)	0.0184381	0.00700472	1.19441e+06	1.37212e+06	1.14879	Pre-mRNA-processing factor 19 OS=Saccharomyces cerevisiae (strain ATCC 204508 / S288c) GN=PRP19 PE=1 SV=2
P14164	ABF1 (P14164)	0.642496	0.13983	2.40854e+06	2.76582e+06	1.14834	ARS-binding factor 1 OS=Saccharomyces cerevisiae (strain ATCC 204508 / S288c) GN=ABF1 PE=1 SV=4
P53973	HDA1 (P53973)	0.00507277	0.00229462	534145	613065	1.14775	Histone deacetylase HDA1 OS=Saccharomyces cerevisiae (strain ATCC 204508 / S288c) GN=HDA1 PE=1 SV=1
Q03940	RVB1 (Q03940)	0.0018615	0.000979829	1.01495e+07	1.16448e+07	1.14732	RuvB-like protein 1 OS=Saccharomyces cerevisiae (strain ATCC 204508 / S288c) GN=RVB1 PE=1 SV=1
P08018	PBS2 (P08018)	0.191048	0.0507801	1.36019e+06	1.56022e+06	1.14706	MAP kinase kinase PBS2 OS=Saccharomyces cerevisiae (strain ATCC 204508 / S288c) GN=PBS2 PE=1 SV=4
P49723	RNR4 (P49723)	0.00189013	0.000992556	4.64574e+07	5.32875e+07	1.14702	Ribonucleoside-diphosphate reductase small chain 2 OS=Saccharomyces cerevisiae (strain ATCC 204508 / S288c) GN=RNR4 PE=1 SV=1
P38856	YAP1801 (P38856)	0.0236461	0.00864764	442296	507021	1.14634	Clathrin coat assembly protein AP180A OS=Saccharomyces cerevisiae (strain ATCC 204508 / S288c) GN=YAP1801 PE=1 SV=1
Q03161	YMR099C (Q03161)	0.00956533	0.00398215	1.34887e+07	1.54554e+07	1.1458	Glucose-6-phosphate 1-epimerase OS=Saccharomyces cerevisiae (strain ATCC 204508 / S288c) GN=YMR099C PE=1 SV=1
Q04651	ERV41 (Q04651)	0.16311	0.0446125	639519	732759	1.1458	ER-derived vesicles protein ERV41 OS=Saccharomyces cerevisiae (strain ATCC 204508 / S288c) GN=ERV41 PE=1 SV=1
P53549	RPT4 (P53549)	0.000575202	0.000359642	4.61582e+06	5.28864e+06	1.14577	26S protease subunit RPT4 OS=Saccharomyces cerevisiae (strain ATCC 204508 / S288c) GN=RPT4 PE=1 SV=4
P38068	GRX7 (P38068)	0.0174681	0.00668938	1.23103e+06	1.41022e+06	1.14556	Monothiol glutaredoxin-7 OS=Saccharomyces cerevisiae (strain ATCC 204508 / S288c) GN=GRX7 PE=1 SV=1
P53011	SEH1 (P53011)	0.0818946	0.0249265	1.58947e+06	1.81864e+06	1.14418	Nucleoporin SEH1 OS=Saccharomyces cerevisiae (strain ATCC 204508 / S288c) GN=SEH1 PE=1 SV=1
P38833	YHR127W (P38833)	0.00693073	0.00299337	638359	730171	1.14383	Uncharacterized protein YHR127W OS=Saccharomyces cerevisiae (strain ATCC 204508 / S288c) GN=YHR127W PE=1 SV=1
P38775	YHR045W (P38775)	0.132427	0.0374135	721718	825448	1.14373	Putative uncharacterized protein YHR045W OS=Saccharomyces cerevisiae (strain ATCC 204508 / S288c) GN=YHR045W PE=4 SV=1
P47018	MTC1 (P47018)	0.0716593	0.0222877	5.2165e+06	5.9648e+06	1.14345	Maintenance of telomere capping protein 1 OS=Saccharomyces cerevisiae (strain ATCC 204508 / S288c) GN=MTC1 PE=1 SV=1
Q02201	OSH6 (Q02201)	0.000108209	8.7772e-05	821907	939133	1.14263	Oxysterol-binding protein homolog 6 OS=Saccharomyces cerevisiae (strain ATCC 204508 / S288c) GN=OSH6 PE=1 SV=1
P23292	YCK2 (P23292)	0.134883	0.0380272	3.06049e+06	3.49379e+06	1.14158	Casein kinase I homolog 2 OS=Saccharomyces cerevisiae (strain ATCC 204508 / S288c) GN=YCK2 PE=1 SV=1
P53064	RTF1 (P53064)	0.116523	0.0336014	2.29087e+06	2.61516e+06	1.14156	RNA polymerase-associated protein RTF1 OS=Saccharomyces cerevisiae (strain ATCC 204508 / S288c) GN=RTF1 PE=1 SV=2
Q05359	ERP1 (Q05359)	0.0568383	0.0182639	1.13171e+07	1.29151e+07	1.1412	Protein ERP1 OS=Saccharomyces cerevisiae (strain ATCC 204508 / S288c) GN=ERP1 PE=1 SV=1
Q12452	ERG27 (Q12452)	0.010568	0.00434973	4.31181e+06	4.9172e+06	1.1404	3-keto-steroid reductase OS=Saccharomyces cerevisiae (strain ATCC 204508 / S288c) GN=ERG27 PE=1 SV=1
P18759	SEC18 (P18759)	0.0268157	0.00958845	5.28601e+06	6.02157e+06	1.13915	Vesicular-fusion protein SEC18 OS=Saccharomyces cerevisiae (strain ATCC 204508 / S288c) GN=SEC18 PE=1 SV=2
P40557	EPS1 (P40557)	0.0767505	0.0236404	2.22832e+06	2.5384e+06	1.13915	ER-retained PMA1-suppressing protein 1 OS=Saccharomyces cerevisiae (strain ATCC 204508 / S288c) GN=EPS1 PE=1 SV=1
P23254	TKL1 (P23254)	0.0915383	0.0272421	1.07604e+08	1.22463e+08	1.13808	Transketolase 1 OS=Saccharomyces cerevisiae (strain ATCC 204508 / S288c) GN=TKL1 PE=1 SV=4
P08678	CYR1 (P08678)	0.000300618	0.000205641	475874	541494	1.13789	Adenylate cyclase OS=Saccharomyces cerevisiae (strain ATCC 204508 / S288c) GN=CYR1 PE=1 SV=2
Q04767	TVP18 (Q04767)	0.0178093	0.00680447	3.53676e+06	4.02345e+06	1.13761	Golgi apparatus membrane protein TVP18 OS=Saccharomyces cerevisiae (strain ATCC 204508 / S288c) GN=TVP18 PE=1 SV=1
P52910	ACS2 (P52910)	0.0479651	0.0157007	3.39451e+07	3.86071e+07	1.13734	Acetyl-coenzyme A synthetase 2 OS=Saccharomyces cerevisiae (strain ATCC 204508 / S288c) GN=ACS2 PE=1 SV=1
P45978	SCD6 (P45978)	0.621151	0.136025	2.83476e+06	3.22271e+06	1.13686	Protein SCD6 OS=Saccharomyces cerevisiae (strain ATCC 204508 / S288c) GN=SCD6 PE=1 SV=1
P38169	BNA4 (P38169)	0.00136833	0.000754678	539053	612774	1.13676	Kynurenine 3-monooxygenase OS=Saccharomyces cerevisiae (strain ATCC 204508 / S288c) GN=BNA4 PE=1 SV=1
P21182	SPE2 (P21182)	0.361493	0.0869312	3.27586e+06	3.72297e+06	1.13648	S-adenosylmethionine decarboxylase proenzyme OS=Saccharomyces cerevisiae (strain ATCC 204508 / S288c) GN=SPE2 PE=1 SV=1
P41940	PSA1 (P41940)	0.00116485	0.000657079	1.52944e+08	1.73769e+08	1.13616	Mannose-1-phosphate guanyltransferase OS=Saccharomyces cerevisiae (strain ATCC 204508 / S288c) GN=PSA1 PE=1 SV=2
P23291	YCK1 (P23291)	0.129885	0.0368509	3.45748e+06	3.92809e+06	1.13611	Casein kinase I homolog 1 OS=Saccharomyces cerevisiae (strain ATCC 204508 / S288c) GN=YCK1 PE=1 SV=1
P32860	NFU1 (P32860)	0.345945	0.0836561	2.87094e+06	3.25664e+06	1.13434	NifU-like protein, mitochondrial OS=Saccharomyces cerevisiae (strain ATCC 204508 / S288c) GN=NFU1 PE=1 SV=2
P40019	CHZ1 (P40019)	0.102951	0.0301291	2.31044e+06	2.61896e+06	1.13353	Histone H2A.Z-specific chaperone CHZ1 OS=Saccharomyces cerevisiae (strain ATCC 204508 / S288c) GN=CHZ1 PE=1 SV=2
P22515	UBA1 (P22515)	0.00708041	0.00304231	3.04871e+07	3.4541e+07	1.13297	Ubiquitin-activating enzyme E1 1 OS=Saccharomyces cerevisiae (strain ATCC 204508 / S288c) GN=UBA1 PE=1 SV=2
P35817	BDF1 (P35817)	0.0168927	0.00650254	1.47405e+06	1.66983e+06	1.13281	Bromodomain-containing factor 1 OS=Saccharomyces cerevisiae (strain ATCC 204508 / S288c) GN=BDF1 PE=1 SV=3
P54860	UFD2 (P54860)	0.0134339	0.00533695	1.4344e+06	1.62454e+06	1.13256	E4 ubiquitin-protein ligase UFD2 OS=Saccharomyces cerevisiae (strain ATCC 204508 / S288c) GN=UFD2 PE=1 SV=3
P53297	PBP1 (P53297)	0.0038812	0.00182152	5.19294e+06	5.88109e+06	1.13252	PAB1-binding protein 1 OS=Saccharomyces cerevisiae (strain ATCC 204508 / S288c) GN=PBP1 PE=1 SV=1
P34160	STO1 (P34160)	0.0153274	0.00598961	5.13255e+06	5.81237e+06	1.13245	Nuclear cap-binding protein complex subunit 1 OS=Saccharomyces cerevisiae (strain ATCC 204508 / S288c) GN=STO1 PE=1 SV=2
P51996	YPT32 (P51996)	0.170346	0.0462701	1.16618e+06	1.31865e+06	1.13075	GTP-binding protein YPT32/YPT11 OS=Saccharomyces cerevisiae (strain ATCC 204508 / S288c) GN=YPT32 PE=1 SV=3
P22082	SNF2 (P22082)	0.222364	0.0576604	258463	292112	1.13019	Transcription regulatory protein SNF2 OS=Saccharomyces cerevisiae (strain ATCC 204508 / S288c) GN=SNF2 PE=1 SV=1
P32602	SEC17 (P32602)	0.121896	0.0349158	6.78763e+06	7.67073e+06	1.1301	Alpha-soluble NSF attachment protein OS=Saccharomyces cerevisiae (strain ATCC 204508 / S288c) GN=SEC17 PE=1 SV=4
P36076	CAB3 (P36076)	0.00566805	0.00252127	316893	358067	1.12993	Coenzyme A biosynthesis protein 3 OS=Saccharomyces cerevisiae (strain ATCC 204508 / S288c) GN=CAB3 PE=1 SV=1
Q06224	YSH1 (Q06224)	0.654365	0.142182	166302	187898	1.12986	Endoribonuclease YSH1 OS=Saccharomyces cerevisiae (strain ATCC 204508 / S288c) GN=YSH1 PE=1 SV=1
P24276	SSD1 (P24276)	0.0823811	0.0250518	3.87736e+06	4.378e+06	1.12912	Protein SSD1 OS=Saccharomyces cerevisiae (strain ATCC 204508 / S288c) GN=SSD1 PE=1 SV=1
P26755	RFA3 (P26755)	0.0161978	0.00627113	2.35763e+06	2.66116e+06	1.12874	Replication factor A protein 3 OS=Saccharomyces cerevisiae (strain ATCC 204508 / S288c) GN=RFA3 PE=1 SV=1
P33297	RPT5 (P33297)	0.00662867	0.00287591	5.93929e+06	6.70086e+06	1.12823	26S protease regulatory subunit 6A OS=Saccharomyces cerevisiae (strain ATCC 204508 / S288c) GN=RPT5 PE=1 SV=3
P21242	PRE10 (P21242)	0.0328914	0.0114473	5.49074e+06	6.1946e+06	1.12819	Probable proteasome subunit alpha type-7 OS=Saccharomyces cerevisiae (strain ATCC 204508 / S288c) GN=PRE10 PE=1 SV=2
P43590	YFR006W (P43590)	0.0433178	0.0144012	1.01586e+07	1.14542e+07	1.12753	Uncharacterized peptidase YFR006W OS=Saccharomyces cerevisiae (strain ATCC 204508 / S288c) GN=YFR006W PE=1 SV=1
P09959	SWI6 (P09959)	0.189402	0.0503924	492793	555419	1.12708	Regulatory protein SWI6 OS=Saccharomyces cerevisiae (strain ATCC 204508 / S288c) GN=SWI6 PE=1 SV=1
Q03330	GCN5 (Q03330)	0.305039	0.0754434	274804	309660	1.12684	Histone acetyltransferase GCN5 OS=Saccharomyces cerevisiae (strain ATCC 204508 / S288c) GN=GCN5 PE=1 SV=1
P35725	YKL063C (P35725)	0.577176	0.127902	1.17452e+06	1.32245e+06	1.12596	Uncharacterized protein YKL063C OS=Saccharomyces cerevisiae (strain ATCC 204508 / S288c) GN=YKL063C PE=1 SV=1
Q10740	LAP2 (Q10740)	0.000135641	0.000105352	3.88714e+06	4.37511e+06	1.12553	Leukotriene A-4 hydrolase homolog OS=Saccharomyces cerevisiae (strain ATCC 204508 / S288c) GN=LAP2 PE=1 SV=1
P16120	THR4 (P16120)	0.00399821	0.00187052	3.58943e+07	4.03891e+07	1.12522	Threonine synthase OS=Saccharomyces cerevisiae (strain ATCC 204508 / S288c) GN=THR4 PE=1 SV=1
P21951	POL2 (P21951)	0.160137	0.0439071	524673	590345	1.12517	DNA polymerase epsilon catalytic subunit A OS=Saccharomyces cerevisiae (strain ATCC 204508 / S288c) GN=POL2 PE=1 SV=1
Q12234	RUD3 (Q12234)	0.60921	0.133761	1.10686e+06	1.24478e+06	1.1246	GRIP domain-containing protein RUD3 OS=Saccharomyces cerevisiae (strain ATCC 204508 / S288c) GN=RUD3 PE=1 SV=1
P38225	FAT1 (P38225)	0.225661	0.058357	1.46662e+06	1.64898e+06	1.12434	Very long-chain fatty acid transport protein OS=Saccharomyces cerevisiae (strain ATCC 204508 / S288c) GN=FAT1 PE=1 SV=2
P43603	LSB3 (P43603)	0.149011	0.041365	3.22593e+06	3.62399e+06	1.12339	LAS seventeen-binding protein 3 OS=Saccharomyces cerevisiae (strain ATCC 204508 / S288c) GN=LSB3 PE=1 SV=3
P25451	PUP3 (P25451)	0.0349641	0.012045	9.52209e+06	1.069e+07	1.12265	Proteasome subunit beta type-3 OS=Saccharomyces cerevisiae (strain ATCC 204508 / S288c) GN=PUP3 PE=1 SV=1
O13516	RPS9A (O13516)	0.0833842	0.0252649	1.54767e+07	1.7371e+07	1.1224	40S ribosomal protein S9-A OS=Saccharomyces cerevisiae (strain ATCC 204508 / S288c) GN=RPS9A PE=1 SV=3
P32462	ERG24 (P32462)	0.860344	0.17864	365788	410528	1.12231	Delta(14)-sterol reductase OS=Saccharomyces cerevisiae (strain ATCC 204508 / S288c) GN=ERG24 PE=1 SV=1
P38351	PAF1 (P38351)	0.0373113	0.0126838	3.52587e+06	3.95691e+06	1.12225	RNA polymerase II-associated protein 1 OS=Saccharomyces cerevisiae (strain ATCC 204508 / S288c) GN=PAF1 PE=1 SV=1
P53622	COP1 (P53622)	0.00308152	0.00149606	1.79044e+07	2.00924e+07	1.1222	Coatomer subunit alpha OS=Saccharomyces cerevisiae (strain ATCC 204508 / S288c) GN=COP1 PE=1 SV=2
P00546	CDC28 (P00546)	0.141487	0.0396715	2.32192e+06	2.60526e+06	1.12203	Cyclin-dependent kinase 1 OS=Saccharomyces cerevisiae (strain ATCC 204508 / S288c) GN=CDC28 PE=1 SV=1
P05694	MET6 (P05694)	0.0823305	0.0250478	4.42054e+07	4.95806e+07	1.1216	5-methyltetrahydropteroyltriglutamate--homocysteine methyltransferase OS=Saccharomyces cerevisiae (strain ATCC 204508 / S288c) GN=MET6 PE=1 SV=4
P15454	GUK1 (P15454)	0.476237	0.109487	1.70929e+07	1.9147e+07	1.12017	Guanylate kinase OS=Saccharomyces cerevisiae (strain ATCC 204508 / S288c) GN=GUK1 PE=1 SV=2
Q12030	TAF10 (Q12030)	0.503631	0.114301	1.76472e+06	1.97639e+06	1.11995	Transcription initiation factor TFIID subunit 10 OS=Saccharomyces cerevisiae (strain ATCC 204508 / S288c) GN=TAF10 PE=1 SV=1
P41832	BNI1 (P41832)	0.991705	0.200988	198703	222291	1.11871	Protein BNI1 OS=Saccharomyces cerevisiae (strain ATCC 204508 / S288c) GN=BNI1 PE=1 SV=3
P38992	SUR2 (P38992)	0.167868	0.0456712	117907	131872	1.11844	Sphingolipid C4-hydroxylase SUR2 OS=Saccharomyces cerevisiae (strain ATCC 204508 / S288c) GN=SUR2 PE=1 SV=1
Q3E7Z5	YIL002W-A (Q3E7Z5)	0.58798	0.130124	1.07804e+06	1.20573e+06	1.11844	Uncharacterized protein YIL002W-A OS=Saccharomyces cerevisiae (strain ATCC 204508 / S288c) GN=YIL002W-A PE=1 SV=1
P41834	UFE1 (P41834)	0.242081	0.0620994	737788	825138	1.11839	Syntaxin UFE1 OS=Saccharomyces cerevisiae (strain ATCC 204508 / S288c) GN=UFE1 PE=1 SV=2
P54787	VPS9 (P54787)	0.659824	0.143228	375960	420246	1.11779	Vacuolar protein sorting-associated protein 9 OS=Saccharomyces cerevisiae (strain ATCC 204508 / S288c) GN=VPS9 PE=1 SV=2
P36104	SWD2 (P36104)	0.0141593	0.00558862	506185	565614	1.11741	COMPASS component SWD2 OS=Saccharomyces cerevisiae (strain ATCC 204508 / S288c) GN=SWD2 PE=1 SV=1
P35207	SKI2 (P35207)	0.384098	0.0917736	1.63843e+06	1.83049e+06	1.11722	Antiviral helicase SKI2 OS=Saccharomyces cerevisiae (strain ATCC 204508 / S288c) GN=SKI2 PE=1 SV=2
P24279	MCM3 (P24279)	0.0943199	0.0279332	1.72609e+06	1.92731e+06	1.11658	DNA replication licensing factor MCM3 OS=Saccharomyces cerevisiae (strain ATCC 204508 / S288c) GN=MCM3 PE=1 SV=1
P33333	SLC1 (P33333)	0.00190554	0.00099812	4.53399e+06	5.05991e+06	1.116	Probable 1-acyl-sn-glycerol-3-phosphate acyltransferase OS=Saccharomyces cerevisiae (strain ATCC 204508 / S288c) GN=SLC1 PE=1 SV=1
Q12159	YRA1 (Q12159)	0.0352611	0.0121099	1.74258e+07	1.94371e+07	1.11542	RNA annealing protein YRA1 OS=Saccharomyces cerevisiae (strain ATCC 204508 / S288c) GN=YRA1 PE=1 SV=2
P38691	KSP1 (P38691)	0.760374	0.160879	554877	618714	1.11505	Serine/threonine-protein kinase KSP1 OS=Saccharomyces cerevisiae (strain ATCC 204508 / S288c) GN=KSP1 PE=1 SV=1
P32915	SEC61 (P32915)	0.444611	0.103245	9.63587e+06	1.07436e+07	1.11496	Protein transport protein SEC61 OS=Saccharomyces cerevisiae (strain ATCC 204508 / S288c) GN=SEC61 PE=1 SV=1
P34909	MOT2 (P34909)	0.166807	0.0454564	2.06984e+06	2.30715e+06	1.11465	General negative regulator of transcription subunit 4 OS=Saccharomyces cerevisiae (strain ATCC 204508 / S288c) GN=MOT2 PE=1 SV=1
P38237	UBP14 (P38237)	0.29509	0.0732442	1.27923e+06	1.42566e+06	1.11446	Ubiquitin carboxyl-terminal hydrolase 14 OS=Saccharomyces cerevisiae (strain ATCC 204508 / S288c) GN=UBP14 PE=1 SV=2
Q07800	PSR1 (Q07800)	0.436402	0.101646	830447	925449	1.1144	Phosphatase PSR1 OS=Saccharomyces cerevisiae (strain ATCC 204508 / S288c) GN=PSR1 PE=1 SV=1
P21576	VPS1 (P21576)	0.0794068	0.0243019	1.53461e+07	1.7099e+07	1.11422	Vacuolar protein sorting-associated protein 1 OS=Saccharomyces cerevisiae (strain ATCC 204508 / S288c) GN=VPS1 PE=1 SV=2
P25297	PHO84 (P25297)	0.00151687	0.000823703	9.45016e+06	1.05252e+07	1.11375	Inorganic phosphate transporter PHO84 OS=Saccharomyces cerevisiae (strain ATCC 204508 / S288c) GN=PHO84 PE=1 SV=2
P40327	RPT2 (P40327)	0.021645	0.00803146	6.22615e+06	6.92914e+06	1.11291	26S protease regulatory subunit 4 homolog OS=Saccharomyces cerevisiae (strain ATCC 204508 / S288c) GN=RPT2 PE=1 SV=3
Q06629	HDA2 (Q06629)	0.685467	0.14774	724294	805665	1.11235	HDA1 complex subunit 2 OS=Saccharomyces cerevisiae (strain ATCC 204508 / S288c) GN=HDA2 PE=1 SV=1
P00498	HIS1 (P00498)	0.800055	0.167999	1.79604e+07	1.99724e+07	1.11203	ATP phosphoribosyltransferase OS=Saccharomyces cerevisiae (strain ATCC 204508 / S288c) GN=HIS1 PE=1 SV=1
P52893	ALT1 (P52893)	0.00193247	0.00100925	7.34523e+06	8.16504e+06	1.11161	Probable alanine aminotransferase, mitochondrial OS=Saccharomyces cerevisiae (strain ATCC 204508 / S288c) GN=ALT1 PE=1 SV=1
P36057	SRP102 (P36057)	0.00712168	0.00305808	1.83387e+06	2.03791e+06	1.11126	Signal recognition particle receptor subunit beta OS=Saccharomyces cerevisiae (strain ATCC 204508 / S288c) GN=SRP102 PE=1 SV=1
P04821	CDC25 (P04821)	0.0225311	0.00831355	325804	361788	1.11045	Cell division control protein 25 OS=Saccharomyces cerevisiae (strain ATCC 204508 / S288c) GN=CDC25 PE=1 SV=1
Q06505	SPN1 (Q06505)	0.671465	0.145284	3.60224e+06	3.99972e+06	1.11034	Transcription factor SPN1 OS=Saccharomyces cerevisiae (strain ATCC 204508 / S288c) GN=SPN1 PE=1 SV=1
P38623	RCK2 (P38623)	0.00780805	0.00332161	3.04348e+06	3.37584e+06	1.1092	Serine/threonine-protein kinase RCK2 OS=Saccharomyces cerevisiae (strain ATCC 204508 / S288c) GN=RCK2 PE=1 SV=3
P40469	MET18 (P40469)	0.46701	0.107588	264679	293545	1.10906	DNA repair/transcription protein MET18/MMS19 OS=Saccharomyces cerevisiae (strain ATCC 204508 / S288c) GN=MET18 PE=1 SV=1
P07277	ERG12 (P07277)	0.338086	0.0822783	3.6555e+06	4.05331e+06	1.10882	Mevalonate kinase OS=Saccharomyces cerevisiae (strain ATCC 204508 / S288c) GN=ERG12 PE=1 SV=1
P38555	YPT31 (P38555)	0.20141	0.0529244	8.05481e+06	8.92954e+06	1.1086	GTP-binding protein YPT31/YPT8 OS=Saccharomyces cerevisiae (strain ATCC 204508 / S288c) GN=YPT31 PE=1 SV=3
P25560	RER1 (P25560)	0.212191	0.0555176	1.61088e+06	1.78505e+06	1.10812	Protein RER1 OS=Saccharomyces cerevisiae (strain ATCC 204508 / S288c) GN=RER1 PE=1 SV=2
P25631	YCR051W (P25631)	0.0485231	0.0158663	5.46798e+06	6.05678e+06	1.10768	Ankyrin repeat-containing protein YCR051W OS=Saccharomyces cerevisiae (strain ATCC 204508 / S288c) GN=YCR051W PE=1 SV=1
P38820	UBA4 (P38820)	0.130228	0.0369013	665031	736505	1.10748	Adenylyltransferase and sulfurtransferase UBA4 OS=Saccharomyces cerevisiae (strain ATCC 204508 / S288c) GN=UBA4 PE=1 SV=1
P36151	YKR070W (P36151)	0.0528443	0.0171369	1.53303e+06	1.6973e+06	1.10715	Uncharacterized protein YKR070W OS=Saccharomyces cerevisiae (strain ATCC 204508 / S288c) GN=YKR070W PE=1 SV=1
P35181	APS1 (P35181)	0.167252	0.0455408	158390	175194	1.10609	AP-1 complex subunit sigma-1 OS=Saccharomyces cerevisiae (strain ATCC 204508 / S288c) GN=APS1 PE=1 SV=1
Q03714	USA1 (Q03714)	0.12253	0.0350615	59337.8	65622.8	1.10592	U1 SNP1-associating protein 1 OS=Saccharomyces cerevisiae (strain ATCC 204508 / S288c) GN=USA1 PE=1 SV=1
P47143	ADO1 (P47143)	0.405281	0.0958084	3.95531e+07	4.37414e+07	1.10589	Adenosine kinase OS=Saccharomyces cerevisiae (strain ATCC 204508 / S288c) GN=ADO1 PE=1 SV=1
P47124	HOC1 (P47124)	0.126201	0.0359275	1.5176e+06	1.67724e+06	1.10519	Putative glycosyltransferase HOC1 OS=Saccharomyces cerevisiae (strain ATCC 204508 / S288c) GN=HOC1 PE=1 SV=3
P53155	YGL082W (P53155)	0.0153431	0.00599223	1.13005e+06	1.24885e+06	1.10512	Uncharacterized protein YGL082W OS=Saccharomyces cerevisiae (strain ATCC 204508 / S288c) GN=YGL082W PE=1 SV=1
P31373	CYS3 (P31373)	0.123468	0.0352475	8.36487e+07	9.22974e+07	1.10339	Cystathionine gamma-lyase OS=Saccharomyces cerevisiae (strain ATCC 204508 / S288c) GN=CYS3 PE=1 SV=2
Q12517	DCP1 (Q12517)	0.920384	0.189461	1.00149e+06	1.10502e+06	1.10337	mRNA-decapping enzyme subunit 1 OS=Saccharomyces cerevisiae (strain ATCC 204508 / S288c) GN=DCP1 PE=1 SV=1
P43619	BNA6 (P43619)	0.142105	0.0398281	2.19425e+06	2.41985e+06	1.10281	Nicotinate-nucleotide pyrophosphorylase [carboxylating] OS=Saccharomyces cerevisiae (strain ATCC 204508 / S288c) GN=BNA6 PE=1 SV=1
P53388	DIP5 (P53388)	0.206953	0.0542957	491582	541940	1.10244	Dicarboxylic amino acid permease OS=Saccharomyces cerevisiae (strain ATCC 204508 / S288c) GN=DIP5 PE=1 SV=1
P22336	RFA1 (P22336)	0.414366	0.0975424	3.0511e+06	3.36338e+06	1.10235	Replication factor A protein 1 OS=Saccharomyces cerevisiae (strain ATCC 204508 / S288c) GN=RFA1 PE=1 SV=1
Q07716	AIM6 (Q07716)	0.0127834	0.00510888	3.53701e+06	3.89774e+06	1.10199	Altered inheritance of mitochondria protein 6 OS=Saccharomyces cerevisiae (strain ATCC 204508 / S288c) GN=AIM6 PE=1 SV=2
P35177	SPT7 (P35177)	0.244273	0.0625675	707978	780122	1.1019	Transcriptional activator SPT7 OS=Saccharomyces cerevisiae (strain ATCC 204508 / S288c) GN=SPT7 PE=1 SV=1
P32499	NUP2 (P32499)	0.143017	0.0400168	6.08841e+06	6.70361e+06	1.10105	Nucleoporin NUP2 OS=Saccharomyces cerevisiae (strain ATCC 204508 / S288c) GN=NUP2 PE=1 SV=2
P04819	CDC9 (P04819)	0.683542	0.147377	1.21004e+06	1.33141e+06	1.1003	DNA ligase 1 OS=Saccharomyces cerevisiae (strain ATCC 204508 / S288c) GN=CDC9 PE=1 SV=2
P25342	CDC10 (P25342)	0.00520673	0.0023457	5.29113e+06	5.82179e+06	1.10029	Cell division control protein 10 OS=Saccharomyces cerevisiae (strain ATCC 204508 / S288c) GN=CDC10 PE=1 SV=1
P32496	RPN12 (P32496)	0.43146	0.100669	9.12107e+06	1.00335e+07	1.10003	26S proteasome regulatory subunit RPN12 OS=Saccharomyces cerevisiae (strain ATCC 204508 / S288c) GN=RPN12 PE=1 SV=3
P07283	SEC53 (P07283)	0.324459	0.0794243	3.73893e+07	4.11109e+07	1.09953	Phosphomannomutase OS=Saccharomyces cerevisiae (strain ATCC 204508 / S288c) GN=SEC53 PE=1 SV=1
P11709	BIK1 (P11709)	0.221027	0.0574028	788192	866592	1.09947	Nuclear fusion protein BIK1 OS=Saccharomyces cerevisiae (strain ATCC 204508 / S288c) GN=BIK1 PE=1 SV=1
P28625	YIM1 (P28625)	0.00492206	0.00223855	7.14214e+06	7.85236e+06	1.09944	Protein YIM1 OS=Saccharomyces cerevisiae (strain ATCC 204508 / S288c) GN=YIM1 PE=1 SV=2
P41338	ERG10 (P41338)	0.0785603	0.0241203	3.50124e+07	3.84858e+07	1.09921	Acetyl-CoA acetyltransferase OS=Saccharomyces cerevisiae (strain ATCC 204508 / S288c) GN=ERG10 PE=1 SV=3
P38248	ECM33 (P38248)	0.334453	0.0815426	6.75438e+07	7.42317e+07	1.09902	Cell wall protein ECM33 OS=Saccharomyces cerevisiae (strain ATCC 204508 / S288c) GN=ECM33 PE=1 SV=3
P80428	ARP4 (P80428)	0.112601	0.0326391	531021	583492	1.09881	Actin-related protein 4 OS=Saccharomyces cerevisiae (strain ATCC 204508 / S288c) GN=ARP4 PE=1 SV=1
P16639	ATE1 (P16639)	0.424761	0.0993948	303988	333851	1.09824	Arginyl-tRNA--protein transferase 1 OS=Saccharomyces cerevisiae (strain ATCC 204508 / S288c) GN=ATE1 PE=1 SV=2
P53189	SCW11 (P53189)	0.000231313	0.000164105	448916	492789	1.09773	Probable family 17 glucosidase SCW11 OS=Saccharomyces cerevisiae (strain ATCC 204508 / S288c) GN=SCW11 PE=1 SV=1
P36166	PXL1 (P36166)	0.321937	0.0789805	331934	364213	1.09724	Paxillin-like protein 1 OS=Saccharomyces cerevisiae (strain ATCC 204508 / S288c) GN=PXL1 PE=1 SV=3
P53044	UFD1 (P53044)	0.0805335	0.0245905	831373	912104	1.09711	Ubiquitin fusion degradation protein 1 OS=Saccharomyces cerevisiae (strain ATCC 204508 / S288c) GN=UFD1 PE=1 SV=1
P32447	ASF1 (P32447)	0.407164	0.0962194	3.52101e+06	3.862e+06	1.09684	Histone chaperone ASF1 OS=Saccharomyces cerevisiae (strain ATCC 204508 / S288c) GN=ASF1 PE=1 SV=1
P40018	SMB1 (P40018)	0.868287	0.179955	497023	545121	1.09677	Small nuclear ribonucleoprotein-associated protein B OS=Saccharomyces cerevisiae (strain ATCC 204508 / S288c) GN=SMB1 PE=1 SV=1
Q03124	RSC9 (Q03124)	0.540833	0.121011	1.69341e+06	1.85667e+06	1.09641	Chromatin structure-remodeling complex subunit RSC9 OS=Saccharomyces cerevisiae (strain ATCC 204508 / S288c) GN=RSC9 PE=1 SV=1
Q04632	COG8 (Q04632)	0.97733	0.199037	879415	963852	1.09602	Conserved oligomeric Golgi complex subunit 8 OS=Saccharomyces cerevisiae (strain ATCC 204508 / S288c) GN=COG8 PE=1 SV=1
P38041	BOI1 (P38041)	0.298669	0.0740596	343130	376026	1.09587	Protein BOB1 OS=Saccharomyces cerevisiae (strain ATCC 204508 / S288c) GN=BOI1 PE=1 SV=1
Q06488	RSC2 (Q06488)	0.29387	0.0730051	815584	893130	1.09508	Chromatin structure-remodeling complex subunit RSC2 OS=Saccharomyces cerevisiae (strain ATCC 204508 / S288c) GN=RSC2 PE=1 SV=1
P07246	ADH3 (P07246)	0.486184	0.111183	1.08261e+07	1.18525e+07	1.09482	Alcohol dehydrogenase 3, mitochondrial OS=Saccharomyces cerevisiae (strain ATCC 204508 / S288c) GN=ADH3 PE=1 SV=2
Q06604	BSP1 (Q06604)	0.135143	0.0380682	205942	225422	1.09459	Protein BSP1 OS=Saccharomyces cerevisiae (strain ATCC 204508 / S288c) GN=BSP1 PE=1 SV=1
P22579	SIN3 (P22579)	0.0849852	0.0255878	1.25235e+06	1.37041e+06	1.09427	Transcriptional regulatory protein SIN3 OS=Saccharomyces cerevisiae (strain ATCC 204508 / S288c) GN=SIN3 PE=1 SV=2
P11938	RAP1 (P11938)	0.066769	0.0210903	2.54892e+06	2.78873e+06	1.09408	DNA-binding protein RAP1 OS=Saccharomyces cerevisiae (strain ATCC 204508 / S288c) GN=RAP1 PE=1 SV=2
P35734	ASK1 (P35734)	0.662184	0.143647	314215	343651	1.09368	DASH complex subunit ASK1 OS=Saccharomyces cerevisiae (strain ATCC 204508 / S288c) GN=ASK1 PE=1 SV=2
P40056	GET2 (P40056)	0.445455	0.10337	3.77506e+06	4.12794e+06	1.09348	Golgi to ER traffic protein 2 OS=Saccharomyces cerevisiae (strain ATCC 204508 / S288c) GN=GET2 PE=1 SV=2
Q12458	YPR1 (Q12458)	0.00138102	0.000760845	9.67791e+06	1.05821e+07	1.09343	Putative reductase 1 OS=Saccharomyces cerevisiae (strain ATCC 204508 / S288c) GN=YPR1 PE=1 SV=1
Q12386	ARP8 (Q12386)	0.492101	0.112324	1.02393e+06	1.11897e+06	1.09281	Actin-like protein ARP8 OS=Saccharomyces cerevisiae (strain ATCC 204508 / S288c) GN=ARP8 PE=1 SV=1
Q05521	DPP1 (Q05521)	0.00598898	0.0026412	1.47228e+06	1.60889e+06	1.09279	Diacylglycerol pyrophosphate phosphatase 1 OS=Saccharomyces cerevisiae (strain ATCC 204508 / S288c) GN=DPP1 PE=1 SV=1
P30665	MCM4 (P30665)	0.136647	0.0384434	598679	654126	1.09261	DNA replication licensing factor MCM4 OS=Saccharomyces cerevisiae (strain ATCC 204508 / S288c) GN=MCM4 PE=1 SV=2
P52891	NUP84 (P52891)	0.804989	0.168846	1.42737e+06	1.55881e+06	1.09209	Nucleoporin NUP84 OS=Saccharomyces cerevisiae (strain ATCC 204508 / S288c) GN=NUP84 PE=1 SV=1
Q04958	NTE1 (Q04958)	0.245284	0.0627524	358274	391157	1.09178	Lysophospholipase NTE1 OS=Saccharomyces cerevisiae (strain ATCC 204508 / S288c) GN=NTE1 PE=1 SV=1
P25605	ILV6 (P25605)	0.499885	0.113558	2.60195e+07	2.84072e+07	1.09177	Acetolactate synthase small subunit, mitochondrial OS=Saccharomyces cerevisiae (strain ATCC 204508 / S288c) GN=ILV6 PE=1 SV=2
P53845	YIF1 (P53845)	0.0263819	0.00946368	2.76804e+06	3.02098e+06	1.09138	Protein transport protein YIF1 OS=Saccharomyces cerevisiae (strain ATCC 204508 / S288c) GN=YIF1 PE=1 SV=1
P43555	EMP47 (P43555)	0.220794	0.0573646	6.24435e+06	6.81177e+06	1.09087	Protein EMP47 OS=Saccharomyces cerevisiae (strain ATCC 204508 / S288c) GN=EMP47 PE=1 SV=1
P38886	RPN10 (P38886)	0.0307866	0.0108062	7.48391e+06	8.16273e+06	1.0907	26S proteasome regulatory subunit RPN10 OS=Saccharomyces cerevisiae (strain ATCC 204508 / S288c) GN=RPN10 PE=1 SV=3
sp|TRYP_PIG|		0.219556	0.057065	2.12714e+08	2.31995e+08	1.09064	sp|TRYP_PIG|
P06101	CDC37 (P06101)	0.00463366	0.00212472	8.27706e+06	9.02623e+06	1.09051	Hsp90 co-chaperone Cdc37 OS=Saccharomyces cerevisiae (strain ATCC 204508 / S288c) GN=CDC37 PE=1 SV=2
P53199	ERG26 (P53199)	0.277675	0.0696281	9.70111e+06	1.05788e+07	1.09047	Sterol-4-alpha-carboxylate 3-dehydrogenase, decarboxylating OS=Saccharomyces cerevisiae (strain ATCC 204508 / S288c) GN=ERG26 PE=1 SV=1
P23642	VAN1 (P23642)	0.447039	0.103701	2.1884e+06	2.3854e+06	1.09002	Mannan polymerase I complex VAN1 subunit OS=Saccharomyces cerevisiae (strain ATCC 204508 / S288c) GN=VAN1 PE=1 SV=3
Q06677	SWA2 (Q06677)	0.147034	0.0409864	677312	737705	1.08917	Auxilin-like clathrin uncoating factor SWA2 OS=Saccharomyces cerevisiae (strain ATCC 204508 / S288c) GN=SWA2 PE=1 SV=1
Q03497	STE20 (Q03497)	0.0121835	0.00491017	1.51038e+06	1.64484e+06	1.08903	Serine/threonine-protein kinase STE20 OS=Saccharomyces cerevisiae (strain ATCC 204508 / S288c) GN=STE20 PE=1 SV=1
P54838	DAK1 (P54838)	0.00787743	0.00334396	1.13919e+07	1.24007e+07	1.08855	Dihydroxyacetone kinase 1 OS=Saccharomyces cerevisiae (strain ATCC 204508 / S288c) GN=DAK1 PE=1 SV=1
Q03280	TOM1 (Q03280)	0.759895	0.160828	806422	877625	1.0883	E3 ubiquitin-protein ligase TOM1 OS=Saccharomyces cerevisiae (strain ATCC 204508 / S288c) GN=TOM1 PE=1 SV=1
Q99260	YPT6 (Q99260)	0.412834	0.0972502	1.15628e+06	1.25828e+06	1.08822	GTP-binding protein YPT6 OS=Saccharomyces cerevisiae (strain ATCC 204508 / S288c) GN=YPT6 PE=1 SV=1
P35189	TAF14 (P35189)	0.416208	0.0978197	6.332e+06	6.88857e+06	1.0879	Transcription initiation factor TFIID subunit 14 OS=Saccharomyces cerevisiae (strain ATCC 204508 / S288c) GN=TAF14 PE=1 SV=1
P38930	CKB2 (P38930)	0.243228	0.0623456	3.35706e+06	3.65154e+06	1.08772	Casein kinase II subunit beta' OS=Saccharomyces cerevisiae (strain ATCC 204508 / S288c) GN=CKB2 PE=1 SV=1
P53853	VPS75 (P53853)	0.0435791	0.0144761	1.7957e+06	1.95249e+06	1.08731	Vacuolar protein sorting-associated protein 75 OS=Saccharomyces cerevisiae (strain ATCC 204508 / S288c) GN=VPS75 PE=1 SV=1
P36132	KAE1 (P36132)	0.121916	0.0349158	496699	540014	1.08721	tRNA N6-adenosine threonylcarbamoyltransferase OS=Saccharomyces cerevisiae (strain ATCC 204508 / S288c) GN=KAE1 PE=1 SV=2
Q01722	GCR2 (Q01722)	0.157087	0.0432837	354170	384896	1.08675	Glycolytic genes transcriptional activator GCR2 OS=Saccharomyces cerevisiae (strain ATCC 204508 / S288c) GN=GCR2 PE=1 SV=1
P40510	SER33 (P40510)	0.43156	0.100669	3.84054e+06	4.17315e+06	1.08661	D-3-phosphoglycerate dehydrogenase 2 OS=Saccharomyces cerevisiae (strain ATCC 204508 / S288c) GN=SER33 PE=1 SV=1
P54964	REX2 (P54964)	0.150504	0.0417105	846582	919752	1.08643	Oligoribonuclease, mitochondrial OS=Saccharomyces cerevisiae (strain ATCC 204508 / S288c) GN=REX2 PE=1 SV=1
P43561	FET5 (P43561)	0.0262498	0.0094264	2.17204e+06	2.3591e+06	1.08612	Iron transport multicopper oxidase FET5 OS=Saccharomyces cerevisiae (strain ATCC 204508 / S288c) GN=FET5 PE=1 SV=1
P35732	DEF1 (P35732)	0.826682	0.172723	3.22129e+07	3.49768e+07	1.0858	RNA polymerase II degradation factor 1 OS=Saccharomyces cerevisiae (strain ATCC 204508 / S288c) GN=DEF1 PE=1 SV=1
P38217	KAP104 (P38217)	0.289991	0.0722022	2.31322e+06	2.51133e+06	1.08564	Importin subunit beta-2 OS=Saccharomyces cerevisiae (strain ATCC 204508 / S288c) GN=KAP104 PE=1 SV=1
P53600	RET3 (P53600)	0.0379096	0.012861	876759	951598	1.08536	Coatomer subunit zeta OS=Saccharomyces cerevisiae (strain ATCC 204508 / S288c) GN=RET3 PE=1 SV=1
P32628	RAD23 (P32628)	0.035239	0.0121085	9.22525e+06	1.00121e+07	1.08529	UV excision repair protein RAD23 OS=Saccharomyces cerevisiae (strain ATCC 204508 / S288c) GN=RAD23 PE=1 SV=1
Q03435	NHP10 (Q03435)	0.0946653	0.0279859	1.49931e+06	1.62651e+06	1.08484	Non-histone protein 10 OS=Saccharomyces cerevisiae (strain ATCC 204508 / S288c) GN=NHP10 PE=1 SV=1
P47017	LSM1 (P47017)	0.0396849	0.0133617	2.03299e+06	2.20449e+06	1.08435	Sm-like protein LSm1 OS=Saccharomyces cerevisiae (strain ATCC 204508 / S288c) GN=LSM1 PE=1 SV=1
P09733	TUB1 (P09733)	0.0207528	0.00775203	1.98167e+07	2.14768e+07	1.08377	Tubulin alpha-1 chain OS=Saccharomyces cerevisiae (strain ATCC 204508 / S288c) GN=TUB1 PE=1 SV=2
Q00578	SSL2 (Q00578)	0.240224	0.0616703	282520	306142	1.08361	DNA repair helicase RAD25 OS=Saccharomyces cerevisiae (strain ATCC 204508 / S288c) GN=SSL2 PE=1 SV=1
Q06839	YPR097W (Q06839)	0.658979	0.143091	572230	619939	1.08337	PX domain-containing protein YPR097W OS=Saccharomyces cerevisiae (strain ATCC 204508 / S288c) GN=YPR097W PE=1 SV=2
P32331	YMC1 (P32331)	0.320512	0.0786596	1.25493e+06	1.35911e+06	1.08301	Carrier protein YMC1, mitochondrial OS=Saccharomyces cerevisiae (strain ATCC 204508 / S288c) GN=YMC1 PE=1 SV=2
P00924	ENO1 (P00924)	0.409768	0.0967322	4.20285e+08	4.5514e+08	1.08293	Enolase 1 OS=Saccharomyces cerevisiae (strain ATCC 204508 / S288c) GN=ENO1 PE=1 SV=3
P33775	PMT1 (P33775)	0.132945	0.0375281	9.52453e+06	1.03106e+07	1.08253	Dolichyl-phosphate-mannose--protein mannosyltransferase 1 OS=Saccharomyces cerevisiae (strain ATCC 204508 / S288c) GN=PMT1 PE=1 SV=1
Q04264	PDS5 (Q04264)	0.964795	0.197053	779049	843180	1.08232	Sister chromatid cohesion protein PDS5 OS=Saccharomyces cerevisiae (strain ATCC 204508 / S288c) GN=PDS5 PE=1 SV=1
Q07655	WHI4 (Q07655)	0.428157	0.100105	820916	888155	1.08191	Protein WHI4 OS=Saccharomyces cerevisiae (strain ATCC 204508 / S288c) GN=WHI4 PE=1 SV=1
P02309		0.109792	0.0319217	4.72665e+07	5.10799e+07	1.08068	Histone H4 OS=Saccharomyces cerevisiae (strain ATCC 204508 / S288c) GN=HHF1 PE=1 SV=2
P32568	SNQ2 (P32568)	0.157361	0.0433235	3.00824e+06	3.24927e+06	1.08012	Protein SNQ2 OS=Saccharomyces cerevisiae (strain ATCC 204508 / S288c) GN=SNQ2 PE=1 SV=2
Q99190	TSC13 (Q99190)	0.384088	0.0917736	1.17912e+06	1.27312e+06	1.07972	Very-long-chain enoyl-CoA reductase OS=Saccharomyces cerevisiae (strain ATCC 204508 / S288c) GN=TSC13 PE=1 SV=1
P43639	CKB1 (P43639)	0.0168443	0.00648762	2.1948e+06	2.3679e+06	1.07887	Casein kinase II subunit beta OS=Saccharomyces cerevisiae (strain ATCC 204508 / S288c) GN=CKB1 PE=1 SV=1
P40154	IES2 (P40154)	0.345632	0.0836561	265142	286038	1.07881	Ino eighty subunit 2 OS=Saccharomyces cerevisiae (strain ATCC 204508 / S288c) GN=IES2 PE=1 SV=1
P50109	PSP2 (P50109)	0.028533	0.010116	2.9029e+06	3.13156e+06	1.07877	Protein PSP2 OS=Saccharomyces cerevisiae (strain ATCC 204508 / S288c) GN=PSP2 PE=1 SV=2
P12688	YPK1 (P12688)	0.0390713	0.0131949	1.93822e+06	2.09056e+06	1.0786	Serine/threonine-protein kinase YPK1 OS=Saccharomyces cerevisiae (strain ATCC 204508 / S288c) GN=YPK1 PE=1 SV=2
P32521	PAN1 (P32521)	0.0348427	0.0120094	4.18682e+06	4.51509e+06	1.07841	Actin cytoskeleton-regulatory complex protein PAN1 OS=Saccharomyces cerevisiae (strain ATCC 204508 / S288c) GN=PAN1 PE=1 SV=2
P40416	ATM1 (P40416)	0.428243	0.100105	402969	434386	1.07796	Iron-sulfur clusters transporter ATM1, mitochondrial OS=Saccharomyces cerevisiae (strain ATCC 204508 / S288c) GN=ATM1 PE=1 SV=2
P38934	BFR1 (P38934)	0.505272	0.114626	1.68668e+07	1.81799e+07	1.07785	Nuclear segregation protein BFR1 OS=Saccharomyces cerevisiae (strain ATCC 204508 / S288c) GN=BFR1 PE=1 SV=1
P38353	SSH1 (P38353)	0.198042	0.052224	1.83419e+07	1.97655e+07	1.07761	Sec sixty-one protein homolog OS=Saccharomyces cerevisiae (strain ATCC 204508 / S288c) GN=SSH1 PE=1 SV=1
P25694	CDC48 (P25694)	0.000373601	0.000248947	3.6675e+07	3.95166e+07	1.07748	Cell division control protein 48 OS=Saccharomyces cerevisiae (strain ATCC 204508 / S288c) GN=CDC48 PE=1 SV=3
P38149	DUG2 (P38149)	0.451486	0.104515	954415	1.02825e+06	1.07736	Probable di- and tripeptidase DUG2 OS=Saccharomyces cerevisiae (strain ATCC 204508 / S288c) GN=DUG2 PE=1 SV=1
P36051	MCD4 (P36051)	0.0825859	0.0250798	953393	1.02645e+06	1.07663	GPI ethanolamine phosphate transferase 1 OS=Saccharomyces cerevisiae (strain ATCC 204508 / S288c) GN=MCD4 PE=1 SV=1
Q06168	SFH1 (Q06168)	0.561588	0.124986	1.12924e+06	1.21562e+06	1.07649	Chromatin structure-remodeling complex subunit SFH1 OS=Saccharomyces cerevisiae (strain ATCC 204508 / S288c) GN=SFH1 PE=1 SV=1
P41921	GLR1 (P41921)	0.0938416	0.0278285	1.89272e+07	2.03666e+07	1.07605	Glutathione reductase OS=Saccharomyces cerevisiae (strain ATCC 204508 / S288c) GN=GLR1 PE=1 SV=2
P53010	PAN2 (P53010)	0.148957	0.041365	251731	270500	1.07456	PAB-dependent poly(A)-specific ribonuclease subunit PAN2 OS=Saccharomyces cerevisiae (strain ATCC 204508 / S288c) GN=PAN2 PE=1 SV=1
P10869	HOM3 (P10869)	0.0236751	0.00864764	3.71469e+06	3.99125e+06	1.07445	Aspartokinase OS=Saccharomyces cerevisiae (strain ATCC 204508 / S288c) GN=HOM3 PE=1 SV=2
P29366	BEM1 (P29366)	0.822597	0.172031	653555	702202	1.07443	Bud emergence protein 1 OS=Saccharomyces cerevisiae (strain ATCC 204508 / S288c) GN=BEM1 PE=1 SV=1
P32896	PDC2 (P32896)	0.0764484	0.023569	310867	333941	1.07423	Protein PDC2 OS=Saccharomyces cerevisiae (strain ATCC 204508 / S288c) GN=PDC2 PE=1 SV=2
Q03012	SPP1 (Q03012)	0.975149	0.198777	253135	271836	1.07388	COMPASS component SPP1 OS=Saccharomyces cerevisiae (strain ATCC 204508 / S288c) GN=SPP1 PE=1 SV=1
P08466	NUC1 (P08466)	0.513943	0.116317	1.38804e+06	1.49037e+06	1.07373	Mitochondrial nuclease OS=Saccharomyces cerevisiae (strain ATCC 204508 / S288c) GN=NUC1 PE=1 SV=1
P53217	YGR026W (P53217)	0.270768	0.0683831	771634	828292	1.07343	Uncharacterized membrane protein YGR026W OS=Saccharomyces cerevisiae (strain ATCC 204508 / S288c) GN=YGR026W PE=1 SV=1
P38355	YBR287W (P38355)	0.00212997	0.00109867	1.18614e+06	1.27257e+06	1.07287	Uncharacterized transporter YBR287W OS=Saccharomyces cerevisiae (strain ATCC 204508 / S288c) GN=YBR287W PE=1 SV=1
P03872		0.199591	0.0525492	1.64826e+06	1.7676e+06	1.0724	Partitioning protein REP2 OS=Saccharomyces cerevisiae (strain ATCC 204508 / S288c) GN=REP2 PE=1 SV=1
P53115	INO80 (P53115)	9.2747e-06	1.10801e-05	1.12986e+06	1.21143e+06	1.0722	Putative DNA helicase INO80 OS=Saccharomyces cerevisiae (strain ATCC 204508 / S288c) GN=INO80 PE=1 SV=1
P48415	SEC16 (P48415)	0.0182269	0.0069442	3.58782e+06	3.84661e+06	1.07213	COPII coat assembly protein SEC16 OS=Saccharomyces cerevisiae (strain ATCC 204508 / S288c) GN=SEC16 PE=1 SV=2
P15700	URA6 (P15700)	0.787286	0.165682	1.73646e+06	1.8614e+06	1.07195	Uridylate kinase OS=Saccharomyces cerevisiae (strain ATCC 204508 / S288c) GN=URA6 PE=1 SV=1
P35179	SSS1 (P35179)	0.199668	0.0525492	1.70453e+07	1.82682e+07	1.07174	Protein transport protein SSS1 OS=Saccharomyces cerevisiae (strain ATCC 204508 / S288c) GN=SSS1 PE=1 SV=2
Q04947	RTN1 (Q04947)	0.376624	0.0902457	4.85768e+07	5.20561e+07	1.07162	Reticulon-like protein 1 OS=Saccharomyces cerevisiae (strain ATCC 204508 / S288c) GN=RTN1 PE=1 SV=1
P40986	CDC1 (P40986)	0.337065	0.0820597	1.66532e+06	1.78432e+06	1.07146	Cell division control protein 1 OS=Saccharomyces cerevisiae (strain ATCC 204508 / S288c) GN=CDC1 PE=1 SV=2
Q12118	SGT2 (Q12118)	0.0696576	0.0217576	2.64704e+07	2.83599e+07	1.07138	Small glutamine-rich tetratricopeptide repeat-containing protein 2 OS=Saccharomyces cerevisiae (strain ATCC 204508 / S288c) GN=SGT2 PE=1 SV=1
P02293	HTB1 (P02293)	0.0179225	0.00683992	5.36452e+07	5.74585e+07	1.07108	Histone H2B.1 OS=Saccharomyces cerevisiae (strain ATCC 204508 / S288c) GN=HTB1 PE=1 SV=2
P25385	BOS1 (P25385)	0.611952	0.13423	1.73107e+06	1.85292e+06	1.07039	Protein transport protein BOS1 OS=Saccharomyces cerevisiae (strain ATCC 204508 / S288c) GN=BOS1 PE=1 SV=1
P53224	ORM1 (P53224)	0.832616	0.173584	3.35213e+06	3.58665e+06	1.06996	Protein ORM1 OS=Saccharomyces cerevisiae (strain ATCC 204508 / S288c) GN=ORM1 PE=1 SV=1
P32364	SMY1 (P32364)	0.0511099	0.0166228	416347	445234	1.06938	Kinesin-related protein SMY1 OS=Saccharomyces cerevisiae (strain ATCC 204508 / S288c) GN=SMY1 PE=1 SV=1
P53177	TYW3 (P53177)	0.0619753	0.019697	1.52533e+06	1.631e+06	1.06928	tRNA wybutosine-synthesizing protein 3 OS=Saccharomyces cerevisiae (strain ATCC 204508 / S288c) GN=TYW3 PE=1 SV=1
P35176	CPR5 (P35176)	0.0295983	0.0104604	1.02255e+07	1.09319e+07	1.06908	Peptidyl-prolyl cis-trans isomerase D OS=Saccharomyces cerevisiae (strain ATCC 204508 / S288c) GN=CPR5 PE=1 SV=1
Q92317	NCB2 (Q92317)	0.0103143	0.00426214	551513	589543	1.06896	Negative cofactor 2 complex subunit beta OS=Saccharomyces cerevisiae (strain ATCC 204508 / S288c) GN=NCB2 PE=1 SV=1
Q99287	SEY1 (Q99287)	0.291657	0.072536	1.83738e+06	1.96391e+06	1.06887	Protein SEY1 OS=Saccharomyces cerevisiae (strain ATCC 204508 / S288c) GN=SEY1 PE=1 SV=1
Q03640	TCB3 (Q03640)	0.755225	0.160144	1.02475e+07	1.09512e+07	1.06867	Tricalbin-3 OS=Saccharomyces cerevisiae (strain ATCC 204508 / S288c) GN=TCB3 PE=1 SV=1
P31539	HSP104 (P31539)	0.000165001	0.000123892	2.23692e+07	2.38993e+07	1.0684	Heat shock protein 104 OS=Saccharomyces cerevisiae (strain ATCC 204508 / S288c) GN=HSP104 PE=1 SV=2
P11076	ARF1 (P11076)	1.36915e-06	2.50267e-06	4.96401e+07	5.30161e+07	1.06801	ADP-ribosylation factor 1 OS=Saccharomyces cerevisiae (strain ATCC 204508 / S288c) GN=ARF1 PE=1 SV=3
P32598	GLC7 (P32598)	0.00845796	0.00355878	1.42688e+07	1.52356e+07	1.06776	Serine/threonine-protein phosphatase PP1-2 OS=Saccharomyces cerevisiae (strain ATCC 204508 / S288c) GN=GLC7 PE=1 SV=1
P40066	GLE2 (P40066)	0.7357	0.1565	1.97318e+06	2.1059e+06	1.06726	Nucleoporin GLE2 OS=Saccharomyces cerevisiae (strain ATCC 204508 / S288c) GN=GLE2 PE=1 SV=1
P53200	YGR001C (P53200)	0.68064	0.146978	3.00803e+06	3.21024e+06	1.06722	N(6)-adenine-specific DNA methyltransferase-like 1 OS=Saccharomyces cerevisiae (strain ATCC 204508 / S288c) GN=AML1 PE=1 SV=2
P38129	TAF5 (P38129)	0.771329	0.162785	2.10135e+06	2.24112e+06	1.06651	Transcription initiation factor TFIID subunit 5 OS=Saccharomyces cerevisiae (strain ATCC 204508 / S288c) GN=TAF5 PE=1 SV=1
P54839	ERG13 (P54839)	0.138144	0.038783	3.88359e+07	4.14166e+07	1.06645	Hydroxymethylglutaryl-CoA synthase OS=Saccharomyces cerevisiae (strain ATCC 204508 / S288c) GN=ERG13 PE=1 SV=1
Q12102	CFT2 (Q12102)	0.36996	0.0888397	570362	608177	1.0663	Cleavage factor two protein 2 OS=Saccharomyces cerevisiae (strain ATCC 204508 / S288c) GN=CFT2 PE=1 SV=1
P46675	STU2 (P46675)	0.610946	0.134054	410425	437493	1.06595	Protein STU2 OS=Saccharomyces cerevisiae (strain ATCC 204508 / S288c) GN=STU2 PE=1 SV=1
P19880	YAP1 (P19880)	0.923667	0.189961	948042	1.01057e+06	1.06595	AP-1-like transcription factor YAP1 OS=Saccharomyces cerevisiae (strain ATCC 204508 / S288c) GN=YAP1 PE=1 SV=2
P53262	VOA1 (P53262)	0.515908	0.116644	1.15243e+06	1.22752e+06	1.06516	V0 assembly protein 1 OS=Saccharomyces cerevisiae (strain ATCC 204508 / S288c) GN=VOA1 PE=1 SV=1
P20433	RPB4 (P20433)	0.910198	0.187767	5.17308e+06	5.50629e+06	1.06441	DNA-directed RNA polymerase II subunit RPB4 OS=Saccharomyces cerevisiae (strain ATCC 204508 / S288c) GN=RPB4 PE=1 SV=1
P12611	WHI2 (P12611)	6.35873e-08	2.74367e-07	74011.6	78742.8	1.06392	Growth regulation protein OS=Saccharomyces cerevisiae (strain ATCC 204508 / S288c) GN=WHI2 PE=1 SV=2
Q12447	PAA1 (Q12447)	0.497587	0.113305	6.78823e+06	7.21765e+06	1.06326	Polyamine N-acetyltransferase 1 OS=Saccharomyces cerevisiae (strain ATCC 204508 / S288c) GN=PAA1 PE=1 SV=1
P36100	TFA1 (P36100)	0.00518635	0.00233809	638630	678903	1.06306	Transcription initiation factor IIE subunit alpha OS=Saccharomyces cerevisiae (strain ATCC 204508 / S288c) GN=TFA1 PE=1 SV=1
P07273	DST1 (P07273)	0.480813	0.110198	3.66381e+06	3.89485e+06	1.06306	Transcription elongation factor S-II OS=Saccharomyces cerevisiae (strain ATCC 204508 / S288c) GN=DST1 PE=1 SV=4
P14843	ARO3 (P14843)	0.147385	0.0409989	7.96481e+06	8.46635e+06	1.06297	Phospho-2-dehydro-3-deoxyheptonate aldolase, phenylalanine-inhibited OS=Saccharomyces cerevisiae (strain ATCC 204508 / S288c) GN=ARO3 PE=1 SV=1
P32939	YPT7 (P32939)	0.526471	0.118431	1.00984e+07	1.07322e+07	1.06276	GTP-binding protein YPT7 OS=Saccharomyces cerevisiae (strain ATCC 204508 / S288c) GN=YPT7 PE=1 SV=1
Q08986	SAM3 (Q08986)	0.0900076	0.0268462	1.79852e+06	1.91016e+06	1.06208	S-adenosylmethionine permease SAM3 OS=Saccharomyces cerevisiae (strain ATCC 204508 / S288c) GN=SAM3 PE=1 SV=1
P25386	USO1 (P25386)	0.683564	0.147377	1.08262e+06	1.14961e+06	1.06187	Intracellular protein transport protein USO1 OS=Saccharomyces cerevisiae (strain ATCC 204508 / S288c) GN=USO1 PE=1 SV=2
P53962	YNL035C (P53962)	0.0220362	0.00814949	1.96679e+06	2.08843e+06	1.06185	Uncharacterized WD repeat-containing protein YNL035C OS=Saccharomyces cerevisiae (strain ATCC 204508 / S288c) GN=YNL035C PE=1 SV=1
P40482	SEC24 (P40482)	0.589308	0.130375	7.56993e+06	8.02903e+06	1.06065	Protein transport protein SEC24 OS=Saccharomyces cerevisiae (strain ATCC 204508 / S288c) GN=SEC24 PE=1 SV=1
P32449	ARO4 (P32449)	0.170344	0.0462701	5.22086e+07	5.53537e+07	1.06024	Phospho-2-dehydro-3-deoxyheptonate aldolase, tyrosine-inhibited OS=Saccharomyces cerevisiae (strain ATCC 204508 / S288c) GN=ARO4 PE=1 SV=2
P40509	SEC28 (P40509)	0.153896	0.0425446	6.97722e+06	7.39715e+06	1.06019	Coatomer subunit epsilon OS=Saccharomyces cerevisiae (strain ATCC 204508 / S288c) GN=SEC28 PE=1 SV=2
P33332	SEC3 (P33332)	0.00859961	0.00361157	3.59836e+06	3.81223e+06	1.05944	Exocyst complex component SEC3 OS=Saccharomyces cerevisiae (strain ATCC 204508 / S288c) GN=SEC3 PE=1 SV=1
P38088	GRS1 (P38088)	0.0283817	0.0100677	3.9929e+07	4.2302e+07	1.05943	Glycine--tRNA ligase 1, mitochondrial OS=Saccharomyces cerevisiae (strain ATCC 204508 / S288c) GN=GRS1 PE=1 SV=3
Q07979	RSC58 (Q07979)	0.749434	0.159118	1.16595e+06	1.23514e+06	1.05934	Chromatin structure-remodeling complex protein RSC58 OS=Saccharomyces cerevisiae (strain ATCC 204508 / S288c) GN=RSC58 PE=1 SV=1
P16603	NCP1 (P16603)	0.20264	0.0532266	1.60582e+07	1.69936e+07	1.05825	NADPH--cytochrome P450 reductase OS=Saccharomyces cerevisiae (strain ATCC 204508 / S288c) GN=NCP1 PE=1 SV=3
P39936	TIF4632 (P39936)	0.420936	0.0986378	4.34613e+06	4.59468e+06	1.05719	Eukaryotic initiation factor 4F subunit p130 OS=Saccharomyces cerevisiae (strain ATCC 204508 / S288c) GN=TIF4632 PE=1 SV=1
Q08971	YPL225W (Q08971)	0.187863	0.0501127	8.31312e+06	8.78839e+06	1.05717	Protein PBDC1 homolog OS=Saccharomyces cerevisiae (strain ATCC 204508 / S288c) GN=YPL225W PE=1 SV=1
Q12096	GNT1 (Q12096)	0.0257059	0.00925097	477660	504885	1.057	Glucose N-acetyltransferase 1 OS=Saccharomyces cerevisiae (strain ATCC 204508 / S288c) GN=GNT1 PE=1 SV=1
P32909	SMY2 (P32909)	0.284031	0.070956	1.13404e+06	1.19819e+06	1.05657	Protein SMY2 OS=Saccharomyces cerevisiae (strain ATCC 204508 / S288c) GN=SMY2 PE=1 SV=2
P32629	ANP1 (P32629)	0.0219099	0.00810728	1.15355e+06	1.21865e+06	1.05644	Mannan polymerase II complex ANP1 subunit OS=Saccharomyces cerevisiae (strain ATCC 204508 / S288c) GN=ANP1 PE=1 SV=3
Q08193	GAS5 (Q08193)	0.453707	0.104957	1.22506e+07	1.29295e+07	1.05541	1,3-beta-glucanosyltransferase GAS5 OS=Saccharomyces cerevisiae (strain ATCC 204508 / S288c) GN=GAS5 PE=1 SV=1
Q03559	YMR295C (Q03559)	0.83414	0.173847	8.05585e+06	8.49491e+06	1.0545	Uncharacterized protein YMR295C OS=Saccharomyces cerevisiae (strain ATCC 204508 / S288c) GN=YMR295C PE=1 SV=1
P39107	MNN9 (P39107)	0.480308	0.110158	2.49743e+06	2.63321e+06	1.05437	Mannan polymerase complexes subunit MNN9 OS=Saccharomyces cerevisiae (strain ATCC 204508 / S288c) GN=MNN9 PE=1 SV=3
P19073	CDC42 (P19073)	0.464506	0.107158	4.0945e+06	4.31484e+06	1.05381	Cell division control protein 42 OS=Saccharomyces cerevisiae (strain ATCC 204508 / S288c) GN=CDC42 PE=1 SV=2
P32074	SEC21 (P32074)	0.248503	0.0634548	1.53357e+07	1.61598e+07	1.05374	Coatomer subunit gamma OS=Saccharomyces cerevisiae (strain ATCC 204508 / S288c) GN=SEC21 PE=1 SV=2
P39013	END3 (P39013)	0.00620892	0.00271848	1.91958e+06	2.02243e+06	1.05358	Actin cytoskeleton-regulatory complex protein END3 OS=Saccharomyces cerevisiae (strain ATCC 204508 / S288c) GN=END3 PE=1 SV=1
Q02796	LGE1 (Q02796)	0.0858842	0.0258004	230445	242764	1.05346	Transcriptional regulatory protein LGE1 OS=Saccharomyces cerevisiae (strain ATCC 204508 / S288c) GN=LGE1 PE=1 SV=1
P38153	APM3 (P38153)	0.314355	0.0774041	1.75567e+06	1.84819e+06	1.05269	AP-3 complex subunit mu OS=Saccharomyces cerevisiae (strain ATCC 204508 / S288c) GN=APM3 PE=1 SV=2
P06105	SCP160 (P06105)	0.0254279	0.00916572	2.64245e+07	2.78139e+07	1.05258	Protein SCP160 OS=Saccharomyces cerevisiae (strain ATCC 204508 / S288c) GN=SCP160 PE=1 SV=3
P32861	UGP1 (P32861)	0.0259354	0.00932352	3.70247e+07	3.89443e+07	1.05185	UTP--glucose-1-phosphate uridylyltransferase OS=Saccharomyces cerevisiae (strain ATCC 204508 / S288c) GN=UGP1 PE=1 SV=1
P48563	MON2 (P48563)	0.18473	0.0494346	762491	801873	1.05165	Protein MON2 OS=Saccharomyces cerevisiae (strain ATCC 204508 / S288c) GN=MON2 PE=1 SV=1
P32660	DNF1 (P32660)	0.0523819	0.01702	1.24031e+06	1.3043e+06	1.05159	Phospholipid-transporting ATPase DNF1 OS=Saccharomyces cerevisiae (strain ATCC 204508 / S288c) GN=DNF1 PE=1 SV=2
P38768	PIH1 (P38768)	0.431561	0.100669	559064	587823	1.05144	Protein interacting with Hsp90 1 OS=Saccharomyces cerevisiae (strain ATCC 204508 / S288c) GN=PIH1 PE=1 SV=1
Q06709	REH1 (Q06709)	0.955983	0.195466	1.10302e+06	1.15938e+06	1.05109	Cytoplasmic 60S subunit biogenesis factor REH1 OS=Saccharomyces cerevisiae (strain ATCC 204508 / S288c) GN=REH1 PE=1 SV=1
P38879	EGD2 (P38879)	0.0247042	0.00894338	1.0369e+08	1.08966e+08	1.05088	Nascent polypeptide-associated complex subunit alpha OS=Saccharomyces cerevisiae (strain ATCC 204508 / S288c) GN=EGD2 PE=1 SV=3
P39704	ERP2 (P39704)	0.178052	0.0479738	8.54392e+06	8.97773e+06	1.05077	Protein ERP2 OS=Saccharomyces cerevisiae (strain ATCC 204508 / S288c) GN=ERP2 PE=1 SV=1
P53849	GIS2 (P53849)	0.0314949	0.0110201	9.75024e+06	1.02371e+07	1.04993	Zinc finger protein GIS2 OS=Saccharomyces cerevisiae (strain ATCC 204508 / S288c) GN=GIS2 PE=1 SV=1
Q12429	YLR143W (Q12429)	0.901101	0.186179	591731	620915	1.04932	Diphthine--ammonia ligase OS=Saccharomyces cerevisiae (strain ATCC 204508 / S288c) GN=DPH6 PE=1 SV=1
P39517	DHH1 (P39517)	0.194609	0.0515013	1.20732e+07	1.26686e+07	1.04931	ATP-dependent RNA helicase DHH1 OS=Saccharomyces cerevisiae (strain ATCC 204508 / S288c) GN=DHH1 PE=1 SV=1
Q12207	NCE102 (Q12207)	2.12724e-07	6.08181e-07	4.72764e+06	4.95829e+06	1.04879	Non-classical export protein 2 OS=Saccharomyces cerevisiae (strain ATCC 204508 / S288c) GN=NCE102 PE=1 SV=1
P39104	PIK1 (P39104)	0.088704	0.0265402	338832	355314	1.04864	Phosphatidylinositol 4-kinase PIK1 OS=Saccharomyces cerevisiae (strain ATCC 204508 / S288c) GN=PIK1 PE=1 SV=1
Q12199	TIP41 (Q12199)	0.49389	0.112655	744262	780362	1.0485	Type 2A phosphatase activator TIP41 OS=Saccharomyces cerevisiae (strain ATCC 204508 / S288c) GN=TIP41 PE=1 SV=1
Q12432	EAF3 (Q12432)	0.715259	0.152734	291753	305904	1.0485	Chromatin modification-related protein EAF3 OS=Saccharomyces cerevisiae (strain ATCC 204508 / S288c) GN=EAF3 PE=1 SV=1
P38203	LSM2 (P38203)	0.515362	0.11656	2.50523e+06	2.62526e+06	1.04791	U6 snRNA-associated Sm-like protein LSm2 OS=Saccharomyces cerevisiae (strain ATCC 204508 / S288c) GN=LSM2 PE=1 SV=1
P22214	SEC22 (P22214)	0.12286	0.0351298	1.39139e+06	1.4574e+06	1.04744	Protein transport protein SEC22 OS=Saccharomyces cerevisiae (strain ATCC 204508 / S288c) GN=SEC22 PE=1 SV=1
Q12154	GET3 (Q12154)	0.827842	0.172903	1.49515e+07	1.56593e+07	1.04734	ATPase GET3 OS=Saccharomyces cerevisiae (strain ATCC 204508 / S288c) GN=GET3 PE=1 SV=1
P22147	XRN1 (P22147)	0.0479696	0.0157007	1.30625e+07	1.3675e+07	1.04689	5'-3' exoribonuclease 1 OS=Saccharomyces cerevisiae (strain ATCC 204508 / S288c) GN=XRN1 PE=1 SV=1
P05373	HEM2 (P05373)	0.705281	0.150893	1.11515e+07	1.16653e+07	1.04607	Delta-aminolevulinic acid dehydratase OS=Saccharomyces cerevisiae (strain ATCC 204508 / S288c) GN=HEM2 PE=1 SV=2
Q12004	TFB4 (Q12004)	0.439403	0.102139	347797	363481	1.0451	RNA polymerase II transcription factor B subunit 4 OS=Saccharomyces cerevisiae (strain ATCC 204508 / S288c) GN=TFB4 PE=1 SV=1
P47082	AVT1 (P47082)	0.783299	0.165103	635538	663915	1.04465	Vacuolar amino acid transporter 1 OS=Saccharomyces cerevisiae (strain ATCC 204508 / S288c) GN=AVT1 PE=1 SV=1
Q92316	OST5 (Q92316)	0.66967	0.145083	2.5585e+06	2.67199e+06	1.04436	Dolichyl-diphosphooligosaccharide--protein glycosyltransferase subunit OST5 OS=Saccharomyces cerevisiae (strain ATCC 204508 / S288c) GN=OST5 PE=1 SV=2
P51862	ROM2 (P51862)	0.670667	0.145158	167174	174384	1.04313	RHO1 GDP-GTP exchange protein 2 OS=Saccharomyces cerevisiae (strain ATCC 204508 / S288c) GN=ROM2 PE=1 SV=1
Q05580	YDR266C (Q05580)	0.571011	0.126746	846369	882640	1.04286	E3 ubiquitin-protein ligase HEL2 OS=Saccharomyces cerevisiae (strain ATCC 204508 / S288c) GN=HEL2 PE=1 SV=1
P36149	BET3 (P36149)	0.490035	0.111967	533302	556124	1.04279	Trafficking protein particle complex subunit BET3 OS=Saccharomyces cerevisiae (strain ATCC 204508 / S288c) GN=BET3 PE=1 SV=1
P39927	PTI1 (P39927)	0.664442	0.144044	695346	724962	1.04259	Protein PTI1 OS=Saccharomyces cerevisiae (strain ATCC 204508 / S288c) GN=PTI1 PE=1 SV=2
P06197	PIS1 (P06197)	0.318915	0.0782964	3.76505e+06	3.92233e+06	1.04177	CDP-diacylglycerol--inositol 3-phosphatidyltransferase OS=Saccharomyces cerevisiae (strain ATCC 204508 / S288c) GN=PIS1 PE=1 SV=1
P21827	SRM1 (P21827)	0.218365	0.0568217	8.59299e+06	8.94895e+06	1.04142	Guanine nucleotide exchange factor SRM1 OS=Saccharomyces cerevisiae (strain ATCC 204508 / S288c) GN=SRM1 PE=1 SV=1
Q02630	NUP116 (Q02630)	0.198537	0.0523338	606118	630377	1.04002	Nucleoporin NUP116/NSP116 OS=Saccharomyces cerevisiae (strain ATCC 204508 / S288c) GN=NUP116 PE=1 SV=2
Q00245	RHO3 (Q00245)	0.085327	0.0256676	2.79089e+06	2.89989e+06	1.03905	GTP-binding protein RHO3 OS=Saccharomyces cerevisiae (strain ATCC 204508 / S288c) GN=RHO3 PE=1 SV=2
Q02629	NUP100 (Q02629)	0.145056	0.0405025	1.77464e+06	1.84329e+06	1.03868	Nucleoporin NUP100/NSP100 OS=Saccharomyces cerevisiae (strain ATCC 204508 / S288c) GN=NUP100 PE=1 SV=1
P14742	GFA1 (P14742)	0.33946	0.0825528	1.20481e+07	1.25111e+07	1.03843	Glutamine--fructose-6-phosphate aminotransferase [isomerizing] OS=Saccharomyces cerevisiae (strain ATCC 204508 / S288c) GN=GFA1 PE=1 SV=4
P32566	SMI1 (P32566)	0.363379	0.0873535	6.03941e+06	6.26754e+06	1.03777	Cell wall assembly regulator SMI1 OS=Saccharomyces cerevisiae (strain ATCC 204508 / S288c) GN=SMI1 PE=1 SV=1
P00937	TRP3 (P00937)	0.00366764	0.00173406	6.72891e+06	6.98193e+06	1.0376	Multifunctional tryptophan biosynthesis protein OS=Saccharomyces cerevisiae (strain ATCC 204508 / S288c) GN=TRP3 PE=1 SV=2
P25340	ERG4 (P25340)	0.0350931	0.0120832	2.5058e+06	2.59885e+06	1.03713	Delta(24(24(1)))-sterol reductase OS=Saccharomyces cerevisiae (strain ATCC 204508 / S288c) GN=ERG4 PE=1 SV=2
P23301	HYP2 (P23301)	0.935438	0.19191	1.437e+08	1.49003e+08	1.0369	Eukaryotic translation initiation factor 5A-1 OS=Saccharomyces cerevisiae (strain ATCC 204508 / S288c) GN=HYP2 PE=1 SV=3
P25632	RSC6 (P25632)	0.522254	0.117681	1.49462e+06	1.54877e+06	1.03623	Chromatin structure-remodeling complex protein RSC6 OS=Saccharomyces cerevisiae (strain ATCC 204508 / S288c) GN=RSC6 PE=1 SV=1
P53281	LSB1 (P53281)	0.379847	0.0908551	1.5578e+06	1.61183e+06	1.03468	LAS seventeen-binding protein 1 OS=Saccharomyces cerevisiae (strain ATCC 204508 / S288c) GN=LSB1 PE=1 SV=1
P00817	IPP1 (P00817)	0.144335	0.040318	1.14959e+08	1.18943e+08	1.03465	Inorganic pyrophosphatase OS=Saccharomyces cerevisiae (strain ATCC 204508 / S288c) GN=IPP1 PE=1 SV=4
P38694	MSC7 (P38694)	0.0502529	0.0163761	3.37888e+06	3.49343e+06	1.0339	Putative aldehyde dehydrogenase-like protein YHR039C OS=Saccharomyces cerevisiae (strain ATCC 204508 / S288c) GN=MSC7 PE=1 SV=1
P25369	LSB5 (P25369)	0.132331	0.0374021	1.22105e+06	1.26152e+06	1.03315	LAS seventeen-binding protein 5 OS=Saccharomyces cerevisiae (strain ATCC 204508 / S288c) GN=LSB5 PE=1 SV=3
Q06506	RRP9 (Q06506)	0.413204	0.0973031	1.55874e+06	1.6095e+06	1.03257	Ribosomal RNA-processing protein 9 OS=Saccharomyces cerevisiae (strain ATCC 204508 / S288c) GN=RRP9 PE=1 SV=1
P38781	RSC30 (P38781)	0.856976	0.178052	205008	211538	1.03186	Chromatin structure-remodeling complex protein RSC30 OS=Saccharomyces cerevisiae (strain ATCC 204508 / S288c) GN=RSC30 PE=1 SV=2
Q12285	MDY2 (Q12285)	0.113384	0.0328093	4.94313e+06	5.09913e+06	1.03156	Ubiquitin-like protein MDY2 OS=Saccharomyces cerevisiae (strain ATCC 204508 / S288c) GN=MDY2 PE=1 SV=1
P35197	GCS1 (P35197)	0.194222	0.0514601	5.55961e+06	5.73499e+06	1.03154	ADP-ribosylation factor GTPase-activating protein GCS1 OS=Saccharomyces cerevisiae (strain ATCC 204508 / S288c) GN=GCS1 PE=1 SV=1
Q06178	NMA1 (Q06178)	0.226313	0.058503	735882	758858	1.03122	Nicotinamide-nucleotide adenylyltransferase 1 OS=Saccharomyces cerevisiae (strain ATCC 204508 / S288c) GN=NMA1 PE=1 SV=1
Q08951	APL5 (Q08951)	0.400949	0.0949855	1.48003e+06	1.52606e+06	1.0311	AP-3 complex subunit delta OS=Saccharomyces cerevisiae (strain ATCC 204508 / S288c) GN=APL5 PE=1 SV=1
Q02455	MLP1 (Q02455)	0.931543	0.191346	1.56558e+06	1.61376e+06	1.03077	Protein MLP1 OS=Saccharomyces cerevisiae (strain ATCC 204508 / S288c) GN=MLP1 PE=1 SV=2
P07342	ILV2 (P07342)	0.000112427	9.05982e-05	2.95088e+07	3.03989e+07	1.03017	Acetolactate synthase catalytic subunit, mitochondrial OS=Saccharomyces cerevisiae (strain ATCC 204508 / S288c) GN=ILV2 PE=1 SV=1
P52490	UBC13 (P52490)	1.24103e-05	1.41925e-05	3.44356e+06	3.54519e+06	1.02951	Ubiquitin-conjugating enzyme E2 13 OS=Saccharomyces cerevisiae (strain ATCC 204508 / S288c) GN=UBC13 PE=1 SV=1
Q04062	RPN9 (Q04062)	0.950791	0.194523	3.98981e+06	4.10554e+06	1.029	26S proteasome regulatory subunit RPN9 OS=Saccharomyces cerevisiae (strain ATCC 204508 / S288c) GN=RPN9 PE=1 SV=1
P13586	PMR1 (P13586)	0.607143	0.133614	3.47903e+06	3.5759e+06	1.02784	Calcium-transporting ATPase 1 OS=Saccharomyces cerevisiae (strain ATCC 204508 / S288c) GN=PMR1 PE=1 SV=1
P15303	SEC23 (P15303)	0.00653694	0.00283795	1.45319e+07	1.4927e+07	1.02719	Protein transport protein SEC23 OS=Saccharomyces cerevisiae (strain ATCC 204508 / S288c) GN=SEC23 PE=1 SV=1
Q08886	GPB1 (Q08886)	0.427282	0.0999498	690563	709124	1.02688	Guanine nucleotide-binding protein subunit beta 1 OS=Saccharomyces cerevisiae (strain ATCC 204508 / S288c) GN=GPB1 PE=1 SV=1
Q04491	SEC13 (Q04491)	0.519181	0.117106	8.67808e+06	8.91124e+06	1.02687	Protein transport protein SEC13 OS=Saccharomyces cerevisiae (strain ATCC 204508 / S288c) GN=SEC13 PE=1 SV=1
P14772	BPT1 (P14772)	0.895343	0.185046	1.07035e+06	1.09897e+06	1.02674	Bile pigment transporter 1 OS=Saccharomyces cerevisiae (strain ATCC 204508 / S288c) GN=BPT1 PE=1 SV=2
P40529	AGE2 (P40529)	0.379653	0.0908412	1.81189e+06	1.85976e+06	1.02642	ADP-ribosylation factor GTPase-activating protein effector protein 2 OS=Saccharomyces cerevisiae (strain ATCC 204508 / S288c) GN=AGE2 PE=1 SV=1
P25375	PRD1 (P25375)	0.951704	0.19465	7.39699e+06	7.59121e+06	1.02626	Saccharolysin OS=Saccharomyces cerevisiae (strain ATCC 204508 / S288c) GN=PRD1 PE=1 SV=1
Q12345	IES3 (Q12345)	0.968999	0.197825	986826	1.0126e+06	1.02612	Ino eighty subunit 3 OS=Saccharomyces cerevisiae (strain ATCC 204508 / S288c) GN=IES3 PE=1 SV=1
P25293	NAP1 (P25293)	0.561116	0.124923	1.86927e+07	1.91704e+07	1.02556	Nucleosome assembly protein OS=Saccharomyces cerevisiae (strain ATCC 204508 / S288c) GN=NAP1 PE=1 SV=2
Q03921	DOP1 (Q03921)	0.48627	0.111183	865136	886808	1.02505	Protein dopey OS=Saccharomyces cerevisiae (strain ATCC 204508 / S288c) GN=DOP1 PE=1 SV=1
P38069	MNN2 (P38069)	0.272382	0.0687129	4.76064e+06	4.8796e+06	1.02499	Alpha-1,2-mannosyltransferase MNN2 OS=Saccharomyces cerevisiae (strain ATCC 204508 / S288c) GN=MNN2 PE=1 SV=1
P40541	IRR1 (P40541)	0.166942	0.0454747	397204	407064	1.02482	Cohesin subunit SCC3 OS=Saccharomyces cerevisiae (strain ATCC 204508 / S288c) GN=IRR1 PE=1 SV=1
P21339	MSB1 (P21339)	0.0018125	0.00095705	235006	240837	1.02481	Morphogenesis-related protein MSB1 OS=Saccharomyces cerevisiae (strain ATCC 204508 / S288c) GN=MSB1 PE=1 SV=1
P29509	TRR1 (P29509)	0.514946	0.116505	6.11939e+07	6.2677e+07	1.02424	Thioredoxin reductase 1 OS=Saccharomyces cerevisiae (strain ATCC 204508 / S288c) GN=TRR1 PE=1 SV=3
Q06451	TPO3 (Q06451)	0.165591	0.0451618	899480	921027	1.02395	Polyamine transporter 3 OS=Saccharomyces cerevisiae (strain ATCC 204508 / S288c) GN=TPO3 PE=1 SV=1
Q03758	BUL2 (Q03758)	0.00176251	0.000935082	533553	546124	1.02356	Ubiquitin ligase-binding protein BUL2 OS=Saccharomyces cerevisiae (strain ATCC 204508 / S288c) GN=BUL2 PE=1 SV=1
P40064	NUP157 (P40064)	0.302011	0.0747499	1.61298e+06	1.65054e+06	1.02329	Nucleoporin NUP157 OS=Saccharomyces cerevisiae (strain ATCC 204508 / S288c) GN=NUP157 PE=1 SV=1
Q06632	CFT1 (Q06632)	0.0684288	0.0214928	520978	532638	1.02238	Protein CFT1 OS=Saccharomyces cerevisiae (strain ATCC 204508 / S288c) GN=CFT1 PE=1 SV=1
P43609	RSC8 (P43609)	0.247554	0.0632364	3.9563e+06	4.04373e+06	1.0221	Chromatin structure-remodeling complex protein RSC8 OS=Saccharomyces cerevisiae (strain ATCC 204508 / S288c) GN=RSC8 PE=1 SV=1
P37020	GEF1 (P37020)	0.677013	0.146365	513354	524473	1.02166	Anion/proton exchange transporter GEF1 OS=Saccharomyces cerevisiae (strain ATCC 204508 / S288c) GN=GEF1 PE=1 SV=2
P42842	EMW1 (P42842)	0.550202	0.122861	3.66186e+06	3.73903e+06	1.02107	Essential for maintenance of the cell wall protein 1 OS=Saccharomyces cerevisiae (strain ATCC 204508 / S288c) GN=EMW1 PE=1 SV=1
Q12465	RAX2 (Q12465)	0.279128	0.0698876	370313	377852	1.02036	Bud site selection protein RAX2 OS=Saccharomyces cerevisiae (strain ATCC 204508 / S288c) GN=RAX2 PE=1 SV=1
P34240	ZRT3 (P34240)	0.67058	0.145158	350552	357650	1.02025	Zinc-regulated transporter 3 OS=Saccharomyces cerevisiae (strain ATCC 204508 / S288c) GN=ZRT3 PE=1 SV=2
P38264	PHO88 (P38264)	0.0118002	0.00479032	3.34734e+07	3.41401e+07	1.01992	Inorganic phosphate transport protein PHO88 OS=Saccharomyces cerevisiae (strain ATCC 204508 / S288c) GN=PHO88 PE=1 SV=1
P41810	SEC26 (P41810)	0.352143	0.0849826	1.52257e+07	1.552e+07	1.01933	Coatomer subunit beta OS=Saccharomyces cerevisiae (strain ATCC 204508 / S288c) GN=SEC26 PE=1 SV=2
P38260	FES1 (P38260)	0.910474	0.187767	6.80592e+06	6.93739e+06	1.01932	Hsp70 nucleotide exchange factor FES1 OS=Saccharomyces cerevisiae (strain ATCC 204508 / S288c) GN=FES1 PE=1 SV=1
P32910	RPC34 (P32910)	0.90978	0.18774	276343	281570	1.01891	DNA-directed RNA polymerase III subunit RPC6 OS=Saccharomyces cerevisiae (strain ATCC 204508 / S288c) GN=RPC34 PE=1 SV=1
P60010	ACT1 (P60010)	0.00246721	0.0012495	3.05894e+08	3.11534e+08	1.01844	Actin OS=Saccharomyces cerevisiae (strain ATCC 204508 / S288c) GN=ACT1 PE=1 SV=1
P38624	PRE3 (P38624)	0.25225	0.0642643	2.5672e+06	2.61314e+06	1.0179	Proteasome subunit beta type-1 OS=Saccharomyces cerevisiae (strain ATCC 204508 / S288c) GN=PRE3 PE=1 SV=2
P36016	LHS1 (P36016)	0.686438	0.147854	1.7995e+06	1.83168e+06	1.01788	Heat shock protein 70 homolog LHS1 OS=Saccharomyces cerevisiae (strain ATCC 204508 / S288c) GN=LHS1 PE=1 SV=1
Q05016	YMR226C (Q05016)	0.0994038	0.0291804	1.30415e+07	1.32743e+07	1.01785	Uncharacterized oxidoreductase YMR226C OS=Saccharomyces cerevisiae (strain ATCC 204508 / S288c) GN=YMR226C PE=1 SV=1
P32480	HIR2 (P32480)	0.0401879	0.0134996	214463	218289	1.01784	Protein HIR2 OS=Saccharomyces cerevisiae (strain ATCC 204508 / S288c) GN=HIR2 PE=1 SV=2
P38828	LSM12 (P38828)	0.964657	0.197053	3.65559e+06	3.71974e+06	1.01755	Protein LSM12 OS=Saccharomyces cerevisiae (strain ATCC 204508 / S288c) GN=LSM12 PE=1 SV=1
P32457	CDC3 (P32457)	0.937923	0.192361	1.71947e+07	1.74934e+07	1.01737	Cell division control protein 3 OS=Saccharomyces cerevisiae (strain ATCC 204508 / S288c) GN=CDC3 PE=1 SV=3
P31755	OCH1 (P31755)	0.0393591	0.0132653	1.21775e+06	1.23778e+06	1.01644	Initiation-specific alpha-1,6-mannosyltransferase OS=Saccharomyces cerevisiae (strain ATCC 204508 / S288c) GN=OCH1 PE=1 SV=1
P16649	TUP1 (P16649)	0.725349	0.154593	1.17863e+07	1.19799e+07	1.01642	General transcriptional corepressor TUP1 OS=Saccharomyces cerevisiae (strain ATCC 204508 / S288c) GN=TUP1 PE=1 SV=2
P53330	RTT102 (P53330)	0.674713	0.145939	2.27164e+06	2.30766e+06	1.01586	Regulator of Ty1 transposition protein 102 OS=Saccharomyces cerevisiae (strain ATCC 204508 / S288c) GN=RTT102 PE=1 SV=2
P22696	ESS1 (P22696)	0.790238	0.166146	2.58963e+06	2.63043e+06	1.01576	Peptidyl-prolyl cis-trans isomerase ESS1 OS=Saccharomyces cerevisiae (strain ATCC 204508 / S288c) GN=ESS1 PE=1 SV=3
P32469	DPH5 (P32469)	0.068928	0.0215989	1.08268e+07	1.09911e+07	1.01518	Diphthine synthase OS=Saccharomyces cerevisiae (strain ATCC 204508 / S288c) GN=DPH5 PE=1 SV=1
Q03063	DIG1 (Q03063)	0.0352227	0.0121085	1.08217e+06	1.09844e+06	1.01503	Down-regulator of invasive growth 1 OS=Saccharomyces cerevisiae (strain ATCC 204508 / S288c) GN=DIG1 PE=1 SV=1
P53337	ERV29 (P53337)	0.0030466	0.00148126	3.32334e+06	3.37316e+06	1.01499	ER-derived vesicles protein ERV29 OS=Saccharomyces cerevisiae (strain ATCC 204508 / S288c) GN=ERV29 PE=1 SV=1
Q08873	SCP1 (Q08873)	0.133339	0.0376076	537955	545960	1.01488	Transgelin OS=Saccharomyces cerevisiae (strain ATCC 204508 / S288c) GN=SCP1 PE=1 SV=1
P38996	NAB3 (P38996)	0.533833	0.119805	3.11905e+06	3.16417e+06	1.01446	Nuclear polyadenylated RNA-binding protein 3 OS=Saccharomyces cerevisiae (strain ATCC 204508 / S288c) GN=NAB3 PE=1 SV=1
P49090	ASN2 (P49090)	0.0442357	0.0146433	6.09594e+07	6.18022e+07	1.01383	Asparagine synthetase [glutamine-hydrolyzing] 2 OS=Saccharomyces cerevisiae (strain ATCC 204508 / S288c) GN=ASN2 PE=1 SV=2
P54885	PRO2 (P54885)	0.447251	0.103714	2.26821e+07	2.29952e+07	1.01381	Gamma-glutamyl phosphate reductase OS=Saccharomyces cerevisiae (strain ATCC 204508 / S288c) GN=PRO2 PE=1 SV=1
P32621	GDA1 (P32621)	0.199455	0.0525346	9.80658e+06	9.94136e+06	1.01374	Guanosine-diphosphatase OS=Saccharomyces cerevisiae (strain ATCC 204508 / S288c) GN=GDA1 PE=1 SV=1
Q12018	CDC53 (Q12018)	0.135544	0.038165	2.34797e+06	2.38005e+06	1.01366	Cell division control protein 53 OS=Saccharomyces cerevisiae (strain ATCC 204508 / S288c) GN=CDC53 PE=1 SV=1
P32179	MET22 (P32179)	0.182262	0.0489511	2.85986e+06	2.89778e+06	1.01326	3'(2'),5'-bisphosphate nucleotidase OS=Saccharomyces cerevisiae (strain ATCC 204508 / S288c) GN=MET22 PE=1 SV=1
P15873	POL30 (P15873)	0.308799	0.0762192	1.80595e+07	1.82681e+07	1.01156	Proliferating cell nuclear antigen OS=Saccharomyces cerevisiae (strain ATCC 204508 / S288c) GN=POL30 PE=1 SV=1
P46677	TAF1 (P46677)	0.016271	0.00629217	163643	165351	1.01044	Transcription initiation factor TFIID subunit 1 OS=Saccharomyces cerevisiae (strain ATCC 204508 / S288c) GN=TAF1 PE=1 SV=1
Q12074	SPE3 (Q12074)	0.641579	0.139721	2.77096e+07	2.79825e+07	1.00985	Spermidine synthase OS=Saccharomyces cerevisiae (strain ATCC 204508 / S288c) GN=SPE3 PE=1 SV=1
P39954	SAH1 (P39954)	0.000849473	0.000503372	8.07275e+07	8.15171e+07	1.00978	Adenosylhomocysteinase OS=Saccharomyces cerevisiae (strain ATCC 204508 / S288c) GN=SAH1 PE=1 SV=1
P25644	PAT1 (P25644)	0.253889	0.064617	3.596e+06	3.6279e+06	1.00887	DNA topoisomerase 2-associated protein PAT1 OS=Saccharomyces cerevisiae (strain ATCC 204508 / S288c) GN=PAT1 PE=1 SV=4
Q06263	VTA1 (Q06263)	0.325271	0.0795648	112884	113865	1.00869	Vacuolar protein sorting-associated protein VTA1 OS=Saccharomyces cerevisiae (strain ATCC 204508 / S288c) GN=VTA1 PE=1 SV=1
P43636	ALG2 (P43636)	0.472222	0.108751	2.20815e+06	2.22709e+06	1.00858	Alpha-1,3/1,6-mannosyltransferase ALG2 OS=Saccharomyces cerevisiae (strain ATCC 204508 / S288c) GN=ALG2 PE=1 SV=2
P32342	SRP21 (P32342)	0.594063	0.131221	1.08938e+06	1.09872e+06	1.00857	Signal recognition particle subunit SRP21 OS=Saccharomyces cerevisiae (strain ATCC 204508 / S288c) GN=SRP21 PE=1 SV=3
P25045	LCB1 (P25045)	0.00611441	0.00268867	4.24236e+06	4.27644e+06	1.00803	Serine palmitoyltransferase 1 OS=Saccharomyces cerevisiae (strain ATCC 204508 / S288c) GN=LCB1 PE=1 SV=2
P32771	SFA1 (P32771)	0.218284	0.0568217	8.23683e+06	8.30177e+06	1.00788	S-(hydroxymethyl)glutathione dehydrogenase OS=Saccharomyces cerevisiae (strain ATCC 204508 / S288c) GN=SFA1 PE=1 SV=1
P40303	PRE6 (P40303)	0.0685727	0.0215178	1.10911e+07	1.1178e+07	1.00783	Proteasome subunit alpha type-4 OS=Saccharomyces cerevisiae (strain ATCC 204508 / S288c) GN=PRE6 PE=1 SV=1
P33767	WBP1 (P33767)	0.507482	0.115049	5.68651e+06	5.72846e+06	1.00738	Dolichyl-diphosphooligosaccharide--protein glycosyltransferase subunit WBP1 OS=Saccharomyces cerevisiae (strain ATCC 204508 / S288c) GN=WBP1 PE=1 SV=1
P38836	ECM14 (P38836)	0.594114	0.131221	3.25389e+06	3.27704e+06	1.00712	Putative metallocarboxypeptidase ECM14 OS=Saccharomyces cerevisiae (strain ATCC 204508 / S288c) GN=ECM14 PE=1 SV=1
P04802	DPS1 (P04802)	0.254991	0.0648145	4.78176e+07	4.81467e+07	1.00688	Aspartate--tRNA ligase, cytoplasmic OS=Saccharomyces cerevisiae (strain ATCC 204508 / S288c) GN=DPS1 PE=1 SV=3
Q12406	ARP7 (Q12406)	0.678291	0.146524	678736	682909	1.00615	Actin-related protein 7 OS=Saccharomyces cerevisiae (strain ATCC 204508 / S288c) GN=ARP7 PE=1 SV=1
Q05635	RNH202 (Q05635)	0.055859	0.0179665	601697	605360	1.00609	Ribonuclease H2 subunit B OS=Saccharomyces cerevisiae (strain ATCC 204508 / S288c) GN=RNH202 PE=1 SV=1
P38286	IFA38 (P38286)	0.85981	0.178585	1.26372e+07	1.27134e+07	1.00603	Very-long-chain 3-oxoacyl-CoA reductase OS=Saccharomyces cerevisiae (strain ATCC 204508 / S288c) GN=IFA38 PE=1 SV=1
P32618	YEL043W (P32618)	0.803474	0.168664	226270	227451	1.00522	Uncharacterized protein YEL043W OS=Saccharomyces cerevisiae (strain ATCC 204508 / S288c) GN=YEL043W PE=1 SV=1
P33892	GCN1 (P33892)	0.0886896	0.0265402	1.08985e+07	1.095e+07	1.00473	Translational activator GCN1 OS=Saccharomyces cerevisiae (strain ATCC 204508 / S288c) GN=GCN1 PE=1 SV=1
P32597	STH1 (P32597)	0.443878	0.103111	2.63878e+06	2.65098e+06	1.00463	Nuclear protein STH1/NPS1 OS=Saccharomyces cerevisiae (strain ATCC 204508 / S288c) GN=STH1 PE=1 SV=1
P32565	RPN2 (P32565)	0.0840619	0.0253751	5.62932e+06	5.65102e+06	1.00386	26S proteasome regulatory subunit RPN2 OS=Saccharomyces cerevisiae (strain ATCC 204508 / S288c) GN=RPN2 PE=1 SV=4
Q08220	GSH2 (Q08220)	0.00623017	0.002726	2.6595e+06	2.66547e+06	1.00224	Glutathione synthetase OS=Saccharomyces cerevisiae (strain ATCC 204508 / S288c) GN=GSH2 PE=1 SV=1
P25625	PER1 (P25625)	0.56937	0.126424	516944	517879	1.00181	Protein PER1 OS=Saccharomyces cerevisiae (strain ATCC 204508 / S288c) GN=PER1 PE=1 SV=1
P32579	SUA5 (P32579)	0.0193215	0.007285	1.35998e+06	1.36224e+06	1.00166	Threonylcarbamoyl-AMP synthase OS=Saccharomyces cerevisiae (strain ATCC 204508 / S288c) GN=SUA5 PE=1 SV=1
P53981	YNL010W (P53981)	0.0354105	0.012155	1.74175e+07	1.74462e+07	1.00165	Uncharacterized phosphatase YNL010W OS=Saccharomyces cerevisiae (strain ATCC 204508 / S288c) GN=YNL010W PE=1 SV=1
Q08581	SLK19 (Q08581)	0.0933359	0.0277031	639119	639522	1.00063	Kinetochore protein SLK19 OS=Saccharomyces cerevisiae (strain ATCC 204508 / S288c) GN=SLK19 PE=1 SV=1
P32901	PTR2 (P32901)	0.0243437	0.00883678	3.58075e+06	3.58087e+06	1.00003	Peptide transporter PTR2 OS=Saccharomyces cerevisiae (strain ATCC 204508 / S288c) GN=PTR2 PE=1 SV=2
P50875	SPT20 (P50875)	0.983979	0.200028	224710	224658	0.999766	Transcription factor SPT20 OS=Saccharomyces cerevisiae (strain ATCC 204508 / S288c) GN=SPT20 PE=1 SV=1
P47044	YJL055W (P47044)	0.768263	0.162343	4.76685e+06	4.76468e+06	0.999545	LOG family protein YJL055W OS=Saccharomyces cerevisiae (strain ATCC 204508 / S288c) GN=YJL055W PE=1 SV=1
P40088	FTR1 (P40088)	0.042188	0.014112	3.03286e+06	3.03085e+06	0.999338	Plasma membrane iron permease OS=Saccharomyces cerevisiae (strain ATCC 204508 / S288c) GN=FTR1 PE=1 SV=1
P54000	SUB1 (P54000)	0.235162	0.0605565	1.82791e+06	1.82663e+06	0.999298	RNA polymerase II transcriptional coactivator SUB1 OS=Saccharomyces cerevisiae (strain ATCC 204508 / S288c) GN=SUB1 PE=1 SV=1
P37302	APE3 (P37302)	0.189439	0.0503924	5.60296e+07	5.59826e+07	0.999162	Aminopeptidase Y OS=Saccharomyces cerevisiae (strain ATCC 204508 / S288c) GN=APE3 PE=1 SV=1
P17536	TPM1 (P17536)	0.79849	0.167723	2.6e+07	2.59773e+07	0.999124	Tropomyosin-1 OS=Saccharomyces cerevisiae (strain ATCC 204508 / S288c) GN=TPM1 PE=1 SV=1
P38164	SEA4 (P38164)	0.0370717	0.0126087	81948.3	81863.3	0.998962	SEH-associated protein 4 OS=Saccharomyces cerevisiae (strain ATCC 204508 / S288c) GN=SEA4 PE=1 SV=2
P00899	TRP2 (P00899)	0.932708	0.191526	1.14906e+07	1.14754e+07	0.99867	Anthranilate synthase component 1 OS=Saccharomyces cerevisiae (strain ATCC 204508 / S288c) GN=TRP2 PE=1 SV=4
P41811	SEC27 (P41811)	0.619406	0.135732	1.85585e+07	1.85317e+07	0.998559	Coatomer subunit beta' OS=Saccharomyces cerevisiae (strain ATCC 204508 / S288c) GN=SEC27 PE=1 SV=1
P40495	LYS12 (P40495)	0.101053	0.0296126	7.68393e+06	7.67204e+06	0.998453	Homoisocitrate dehydrogenase, mitochondrial OS=Saccharomyces cerevisiae (strain ATCC 204508 / S288c) GN=LYS12 PE=1 SV=1
P35729	NUP120 (P35729)	0.982482	0.199845	1.27492e+06	1.27284e+06	0.99837	Nucleoporin NUP120 OS=Saccharomyces cerevisiae (strain ATCC 204508 / S288c) GN=NUP120 PE=1 SV=1
P40459	PAN6 (P40459)	0.938893	0.192501	1.3544e+06	1.35191e+06	0.998163	Pantoate--beta-alanine ligase OS=Saccharomyces cerevisiae (strain ATCC 204508 / S288c) GN=PAN6 PE=1 SV=2
P02829	HSP82 (P02829)	0.478209	0.10979	3.55384e+07	3.54651e+07	0.997938	ATP-dependent molecular chaperone HSP82 OS=Saccharomyces cerevisiae (strain ATCC 204508 / S288c) GN=HSP82 PE=1 SV=1
P15108	HSC82 (P15108)	0.478209	0.10979	1.89796e+08	1.89404e+08	0.997938	ATP-dependent molecular chaperone HSC82 OS=Saccharomyces cerevisiae (strain ATCC 204508 / S288c) GN=HSC82 PE=1 SV=4
P53954	ALG11 (P53954)	0.0928679	0.0275887	404732	403834	0.997781	GDP-Man:Man(3)GlcNAc(2)-PP-Dol alpha-1,2-mannosyltransferase OS=Saccharomyces cerevisiae (strain ATCC 204508 / S288c) GN=ALG11 PE=1 SV=1
Q12038	SRO7 (Q12038)	0.701756	0.150379	259242	258541	0.997295	Lethal(2) giant larvae protein homolog SRO7 OS=Saccharomyces cerevisiae (strain ATCC 204508 / S288c) GN=SRO7 PE=1 SV=1
Q05778	PBA1 (Q05778)	0.985093	0.200194	1.42332e+06	1.41707e+06	0.995609	Proteasome chaperone 1 OS=Saccharomyces cerevisiae (strain ATCC 204508 / S288c) GN=PBA1 PE=1 SV=2
P32558	SPT16 (P32558)	0.274374	0.0689798	9.86492e+06	9.82005e+06	0.995452	FACT complex subunit SPT16 OS=Saccharomyces cerevisiae (strain ATCC 204508 / S288c) GN=SPT16 PE=1 SV=1
P38890	SET5 (P38890)	0.293306	0.072892	265221	263944	0.995186	Putative protein lysine methyltransferase SET5 OS=Saccharomyces cerevisiae (strain ATCC 204508 / S288c) GN=SET5 PE=1 SV=1
P32588	PUB1 (P32588)	0.922701	0.189821	1.98949e+07	1.97874e+07	0.994599	Nuclear and cytoplasmic polyadenylated RNA-binding protein PUB1 OS=Saccharomyces cerevisiae (strain ATCC 204508 / S288c) GN=PUB1 PE=1 SV=4
Q12518	ENT1 (Q12518)	0.0530363	0.0171742	2.54963e+06	2.53505e+06	0.994283	Epsin-1 OS=Saccharomyces cerevisiae (strain ATCC 204508 / S288c) GN=ENT1 PE=1 SV=1
P38315	YBP1 (P38315)	0.00637068	0.00278021	985401	978908	0.993411	YAP1-binding protein 1 OS=Saccharomyces cerevisiae (strain ATCC 204508 / S288c) GN=YBP1 PE=1 SV=1
P53141	MLC1 (P53141)	0.335381	0.0817093	1.03411e+07	1.02708e+07	0.993198	Myosin light chain 1 OS=Saccharomyces cerevisiae (strain ATCC 204508 / S288c) GN=MLC1 PE=1 SV=1
P39958	GDI1 (P39958)	0.0110089	0.00450464	9.42496e+06	9.35617e+06	0.992701	Rab GDP-dissociation inhibitor OS=Saccharomyces cerevisiae (strain ATCC 204508 / S288c) GN=GDI1 PE=1 SV=1
P43563	MOB2 (P43563)	0.880673	0.182183	1.1667e+06	1.15786e+06	0.992427	CBK1 kinase activator protein MOB2 OS=Saccharomyces cerevisiae (strain ATCC 204508 / S288c) GN=MOB2 PE=1 SV=2
P39526	LAA1 (P39526)	0.970231	0.197895	588567	584041	0.992311	AP-1 accessory protein LAA1 OS=Saccharomyces cerevisiae (strain ATCC 204508 / S288c) GN=LAA1 PE=1 SV=1
P40013	BIM1 (P40013)	0.922303	0.189797	458923	455325	0.99216	Protein BIM1 OS=Saccharomyces cerevisiae (strain ATCC 204508 / S288c) GN=BIM1 PE=1 SV=1
P33734	HIS7 (P33734)	0.327837	0.0800755	7.06109e+06	7.00412e+06	0.991932	Imidazole glycerol phosphate synthase hisHF OS=Saccharomyces cerevisiae (strain ATCC 204508 / S288c) GN=HIS7 PE=1 SV=2
P53732	MRPS12 (P53732)	0.480765	0.110198	1.37513e+06	1.36319e+06	0.991319	37S ribosomal protein S12, mitochondrial OS=Saccharomyces cerevisiae (strain ATCC 204508 / S288c) GN=MRPS12 PE=1 SV=1
Q08925	MRN1 (Q08925)	0.595333	0.131447	1.95771e+06	1.94028e+06	0.991097	RNA-binding protein MRN1 OS=Saccharomyces cerevisiae (strain ATCC 204508 / S288c) GN=MRN1 PE=1 SV=1
Q12494	KCS1 (Q12494)	0.981582	0.199723	362008	358614	0.990625	Inositol hexakisphosphate kinase 1 OS=Saccharomyces cerevisiae (strain ATCC 204508 / S288c) GN=KCS1 PE=1 SV=1
Q03579	LIP1 (Q03579)	0.0865713	0.0259951	2.68446e+06	2.65914e+06	0.99057	Ceramide synthase subunit LIP1 OS=Saccharomyces cerevisiae (strain ATCC 204508 / S288c) GN=LIP1 PE=1 SV=1
P32264	PRO1 (P32264)	0.715789	0.152793	5.9448e+06	5.88596e+06	0.990102	Glutamate 5-kinase OS=Saccharomyces cerevisiae (strain ATCC 204508 / S288c) GN=PRO1 PE=1 SV=2
P40506	CAB2 (P40506)	0.216992	0.0565304	1.40036e+06	1.38612e+06	0.989829	Phosphopantothenate--cysteine ligase CAB2 OS=Saccharomyces cerevisiae (strain ATCC 204508 / S288c) GN=CAB2 PE=1 SV=2
Q03655	GAS3 (Q03655)	0.153568	0.0424717	1.22304e+07	1.21047e+07	0.989716	Probable 1,3-beta-glucanosyltransferase GAS3 OS=Saccharomyces cerevisiae (strain ATCC 204508 / S288c) GN=GAS3 PE=1 SV=1
Q99316	MPD2 (Q99316)	0.182318	0.0489511	803560	794535	0.988769	Protein disulfide isomerase MPD2 OS=Saccharomyces cerevisiae (strain ATCC 204508 / S288c) GN=MPD2 PE=1 SV=1
P39683	NPT1 (P39683)	0.653759	0.142096	5.0665e+06	5.00536e+06	0.987932	Nicotinate phosphoribosyltransferase OS=Saccharomyces cerevisiae (strain ATCC 204508 / S288c) GN=NPT1 PE=1 SV=3
P29295	HRR25 (P29295)	0.324198	0.0793894	1.59881e+06	1.57889e+06	0.987543	Casein kinase I homolog HRR25 OS=Saccharomyces cerevisiae (strain ATCC 204508 / S288c) GN=HRR25 PE=1 SV=1
P40075	SCS2 (P40075)	0.695042	0.149227	3.57681e+07	3.53202e+07	0.987477	Vesicle-associated membrane protein-associated protein SCS2 OS=Saccharomyces cerevisiae (strain ATCC 204508 / S288c) GN=SCS2 PE=1 SV=3
P19454	CKA2 (P19454)	0.99528	0.20159	1.79727e+06	1.77372e+06	0.986902	Casein kinase II subunit alpha' OS=Saccharomyces cerevisiae (strain ATCC 204508 / S288c) GN=CKA2 PE=1 SV=2
P48445	BPL1 (P48445)	0.944991	0.193454	736845	725853	0.985083	Biotin--protein ligase OS=Saccharomyces cerevisiae (strain ATCC 204508 / S288c) GN=BPL1 PE=1 SV=1
P32497	NIP1 (P32497)	0.322739	0.079148	2.11912e+07	2.08687e+07	0.984783	Eukaryotic translation initiation factor 3 subunit C OS=Saccharomyces cerevisiae (strain ATCC 204508 / S288c) GN=NIP1 PE=1 SV=2
Q04119	PPN1 (Q04119)	0.985541	0.200224	524180	515972	0.98434	Endopolyphosphatase OS=Saccharomyces cerevisiae (strain ATCC 204508 / S288c) GN=PPN1 PE=1 SV=1
P23615	SPT6 (P23615)	0.410292	0.0968219	7.34567e+06	7.22955e+06	0.984193	Transcription elongation factor SPT6 OS=Saccharomyces cerevisiae (strain ATCC 204508 / S288c) GN=SPT6 PE=1 SV=1
Q07878	VPS13 (Q07878)	0.172427	0.0467404	2.10163e+06	2.06828e+06	0.98413	Vacuolar protein sorting-associated protein 13 OS=Saccharomyces cerevisiae (strain ATCC 204508 / S288c) GN=VPS13 PE=1 SV=1
P47119	HAM1 (P47119)	0.915086	0.188561	7.76394e+06	7.64063e+06	0.984117	Inosine triphosphate pyrophosphatase OS=Saccharomyces cerevisiae (strain ATCC 204508 / S288c) GN=HAM1 PE=1 SV=1
P09950	HEM1 (P09950)	0.395695	0.0939406	4.02645e+06	3.96241e+06	0.984096	5-aminolevulinate synthase, mitochondrial OS=Saccharomyces cerevisiae (strain ATCC 204508 / S288c) GN=HEM1 PE=1 SV=1
P40463	VHS2 (P40463)	0.00097133	0.000562624	314847	309788	0.983933	Protein VHS2 OS=Saccharomyces cerevisiae (strain ATCC 204508 / S288c) GN=VHS2 PE=1 SV=1
P06102	NOT3 (P06102)	0.0793687	0.0243014	1.77683e+06	1.74746e+06	0.983471	General negative regulator of transcription subunit 3 OS=Saccharomyces cerevisiae (strain ATCC 204508 / S288c) GN=NOT3 PE=1 SV=2
P21373	UTR1 (P21373)	0.87849	0.181844	207546	204097	0.98338	NAD(+) kinase OS=Saccharomyces cerevisiae (strain ATCC 204508 / S288c) GN=UTR1 PE=1 SV=2
P41805	RPL10 (P41805)	0.154108	0.0425856	3.90313e+08	3.83751e+08	0.983188	60S ribosomal protein L10 OS=Saccharomyces cerevisiae (strain ATCC 204508 / S288c) GN=RPL10 PE=1 SV=1
Q04201	CUE4 (Q04201)	0.025043	0.00905134	2.46193e+06	2.42013e+06	0.98302	CUE domain-containing protein CUE4 OS=Saccharomyces cerevisiae (strain ATCC 204508 / S288c) GN=CUE4 PE=1 SV=1
Q3E833	PCC1 (Q3E833)	0.851891	0.177105	1.83581e+06	1.80449e+06	0.982938	EKC/KEOPS complex subunit PCC1 OS=Saccharomyces cerevisiae (strain ATCC 204508 / S288c) GN=PCC1 PE=1 SV=1
P29468	PAP1 (P29468)	0.654868	0.142245	832662	818331	0.98279	Poly(A) polymerase OS=Saccharomyces cerevisiae (strain ATCC 204508 / S288c) GN=PAP1 PE=1 SV=1
P40483	YIL108W (P40483)	0.986875	0.200373	680735	668469	0.981981	Putative zinc metalloproteinase YIL108W OS=Saccharomyces cerevisiae (strain ATCC 204508 / S288c) GN=YIL108W PE=1 SV=1
P08518	RPB2 (P08518)	0.0817463	0.0248956	4.94459e+06	4.85526e+06	0.981935	DNA-directed RNA polymerase II subunit RPB2 OS=Saccharomyces cerevisiae (strain ATCC 204508 / S288c) GN=RPB2 PE=1 SV=2
Q04066	BNA7 (Q04066)	0.980057	0.199473	860031	844338	0.981753	Kynurenine formamidase OS=Saccharomyces cerevisiae (strain ATCC 204508 / S288c) GN=BNA7 PE=1 SV=1
P12683	HMG1 (P12683)	0.708736	0.151583	1.54363e+06	1.51385e+06	0.980709	3-hydroxy-3-methylglutaryl-coenzyme A reductase 1 OS=Saccharomyces cerevisiae (strain ATCC 204508 / S288c) GN=HMG1 PE=1 SV=1
P05759	RPS31 (P05759)	0.346123	0.0836561	2.48152e+08	2.43299e+08	0.980446	Ubiquitin-40S ribosomal protein S31 OS=Saccharomyces cerevisiae (strain ATCC 204508 / S288c) GN=RPS31 PE=1 SV=3
Q12068	GRE2 (Q12068)	0.985862	0.200229	2.66175e+06	2.60909e+06	0.980216	NADPH-dependent methylglyoxal reductase GRE2 OS=Saccharomyces cerevisiae (strain ATCC 204508 / S288c) GN=GRE2 PE=1 SV=1
P39998	EDC3 (P39998)	0.532661	0.119623	1.08988e+06	1.0681e+06	0.980015	Enhancer of mRNA-decapping protein 3 OS=Saccharomyces cerevisiae (strain ATCC 204508 / S288c) GN=EDC3 PE=1 SV=1
P41920	YRB1 (P41920)	0.132798	0.0375024	2.7718e+07	2.71543e+07	0.979663	Ran-specific GTPase-activating protein 1 OS=Saccharomyces cerevisiae (strain ATCC 204508 / S288c) GN=YRB1 PE=1 SV=1
P43321	SMD3 (P43321)	0.989831	0.20073	930342	910670	0.978855	Small nuclear ribonucleoprotein Sm D3 OS=Saccharomyces cerevisiae (strain ATCC 204508 / S288c) GN=SMD3 PE=1 SV=1
P53538	SSU72 (P53538)	0.812479	0.170287	490735	480291	0.978716	RNA polymerase II subunit A C-terminal domain phosphatase SSU72 OS=Saccharomyces cerevisiae (strain ATCC 204508 / S288c) GN=SSU72 PE=1 SV=1
Q01939	RPT6 (Q01939)	0.308267	0.0761574	4.46123e+06	4.36149e+06	0.977642	26S protease regulatory subunit 8 homolog OS=Saccharomyces cerevisiae (strain ATCC 204508 / S288c) GN=RPT6 PE=1 SV=4
P40462	TMA108 (P40462)	0.00206742	0.0010697	5.32772e+06	5.20749e+06	0.977434	Protein TMA108 OS=Saccharomyces cerevisiae (strain ATCC 204508 / S288c) GN=TMA108 PE=1 SV=1
P32352	ERG2 (P32352)	0.000929222	0.000543884	1.08088e+07	1.05631e+07	0.977266	C-8 sterol isomerase OS=Saccharomyces cerevisiae (strain ATCC 204508 / S288c) GN=ERG2 PE=1 SV=1
Q06440	CRN1 (Q06440)	0.841704	0.175369	4.59533e+06	4.48567e+06	0.976137	Coronin-like protein OS=Saccharomyces cerevisiae (strain ATCC 204508 / S288c) GN=CRN1 PE=1 SV=1
P39685	POM152 (P39685)	0.749302	0.159118	2.32716e+06	2.27031e+06	0.975572	Nucleoporin POM152 OS=Saccharomyces cerevisiae (strain ATCC 204508 / S288c) GN=POM152 PE=1 SV=1
P32368	SAC1 (P32368)	0.135762	0.0382105	1.09407e+07	1.06698e+07	0.975241	Phosphoinositide phosphatase SAC1 OS=Saccharomyces cerevisiae (strain ATCC 204508 / S288c) GN=SAC1 PE=1 SV=1
Q05027	TAF9 (Q05027)	0.969943	0.197895	853900	832326	0.974735	Transcription initiation factor TFIID subunit 9 OS=Saccharomyces cerevisiae (strain ATCC 204508 / S288c) GN=TAF9 PE=1 SV=1
P36036	YRA2 (P36036)	0.420495	0.098569	3.62429e+06	3.53094e+06	0.974243	RNA annealing protein YRA2 OS=Saccharomyces cerevisiae (strain ATCC 204508 / S288c) GN=YRA2 PE=1 SV=1
P33334	PRP8 (P33334)	0.00224263	0.00114618	262574	255809	0.974235	Pre-mRNA-splicing factor 8 OS=Saccharomyces cerevisiae (strain ATCC 204508 / S288c) GN=PRP8 PE=1 SV=1
P04050	RPO21 (P04050)	0.113552	0.0328436	8.40104e+06	8.18454e+06	0.974229	DNA-directed RNA polymerase II subunit RPB1 OS=Saccharomyces cerevisiae (strain ATCC 204508 / S288c) GN=RPO21 PE=1 SV=2
P40207	YMR134W (P40207)	0.0363965	0.0124106	204783	199465	0.974035	Uncharacterized protein YMR134W OS=Saccharomyces cerevisiae (strain ATCC 204508 / S288c) GN=YMR134W PE=1 SV=1
P32614	YEL047C (P32614)	0.151051	0.0418448	8.70294e+06	8.47226e+06	0.973494	Fumarate reductase 1 OS=Saccharomyces cerevisiae (strain ATCC 204508 / S288c) GN=FRD1 PE=1 SV=1
P40015	ISC1 (P40015)	0.219033	0.0569512	572098	556254	0.972306	Inositol phosphosphingolipids phospholipase C OS=Saccharomyces cerevisiae (strain ATCC 204508 / S288c) GN=ISC1 PE=1 SV=1
Q08601	MCA1 (Q08601)	0.768721	0.162388	5.13227e+06	4.98896e+06	0.972077	Metacaspase-1 OS=Saccharomyces cerevisiae (strain ATCC 204508 / S288c) GN=MCA1 PE=1 SV=2
P21657	DAL81 (P21657)	0.608004	0.133627	505816	491538	0.971772	Transcriptional activator protein DAL81 OS=Saccharomyces cerevisiae (strain ATCC 204508 / S288c) GN=DAL81 PE=1 SV=3
P22936	APN1 (P22936)	0.463521	0.107005	1.42765e+06	1.38561e+06	0.970555	DNA-(apurinic or apyrimidinic site) lyase 1 OS=Saccharomyces cerevisiae (strain ATCC 204508 / S288c) GN=APN1 PE=1 SV=4
P46985	MNN11 (P46985)	0.585785	0.129681	2.72907e+06	2.64785e+06	0.97024	Probable alpha-1,6-mannosyltransferase MNN11 OS=Saccharomyces cerevisiae (strain ATCC 204508 / S288c) GN=MNN11 PE=1 SV=2
Q06833	YPR091C (Q06833)	0.147229	0.0409924	2.81738e+06	2.73333e+06	0.970167	Uncharacterized PH domain-containing protein YPR091C OS=Saccharomyces cerevisiae (strain ATCC 204508 / S288c) GN=YPR091C PE=1 SV=1
P13393	SPT15 (P13393)	0.0411365	0.0137742	3.11011e+06	3.01698e+06	0.970056	TATA-box-binding protein OS=Saccharomyces cerevisiae (strain ATCC 204508 / S288c) GN=SPT15 PE=1 SV=3
P38811	TRA1 (P38811)	0.52592	0.118347	956809	927957	0.969846	Transcription-associated protein 1 OS=Saccharomyces cerevisiae (strain ATCC 204508 / S288c) GN=TRA1 PE=1 SV=1
P31115	DEG1 (P31115)	0.210704	0.0551714	256886	249133	0.96982	tRNA pseudouridine(38/39) synthase OS=Saccharomyces cerevisiae (strain ATCC 204508 / S288c) GN=DEG1 PE=1 SV=1
P34167	TIF3 (P34167)	0.508729	0.115293	3.61337e+07	3.50393e+07	0.969712	Eukaryotic translation initiation factor 4B OS=Saccharomyces cerevisiae (strain ATCC 204508 / S288c) GN=TIF3 PE=1 SV=1
P42935	ELP2 (P42935)	0.458442	0.105906	3.23781e+06	3.13734e+06	0.96897	Elongator complex protein 2 OS=Saccharomyces cerevisiae (strain ATCC 204508 / S288c) GN=ELP2 PE=1 SV=1
P40548	SNL1 (P40548)	0.207051	0.0543001	1.09472e+06	1.06074e+06	0.968957	HSP70 co-chaperone SNL1 OS=Saccharomyces cerevisiae (strain ATCC 204508 / S288c) GN=SNL1 PE=1 SV=1
Q08548	ALE1 (Q08548)	0.712173	0.152172	1.78156e+06	1.72609e+06	0.968865	Lysophospholipid acyltransferase OS=Saccharomyces cerevisiae (strain ATCC 204508 / S288c) GN=ALE1 PE=1 SV=1
Q12246	LCB4 (Q12246)	0.287334	0.0716207	1.12804e+06	1.09285e+06	0.968802	Sphingoid long chain base kinase 4 OS=Saccharomyces cerevisiae (strain ATCC 204508 / S288c) GN=LCB4 PE=1 SV=1
P00560	PGK1 (P00560)	0.221415	0.0574812	8.48313e+08	8.21814e+08	0.968763	Phosphoglycerate kinase OS=Saccharomyces cerevisiae (strain ATCC 204508 / S288c) GN=PGK1 PE=1 SV=2
Q99369	FSH3 (Q99369)	0.112883	0.0326927	652479	632023	0.968648	Family of serine hydrolases 3 OS=Saccharomyces cerevisiae (strain ATCC 204508 / S288c) GN=FSH3 PE=1 SV=1
P49954	NIT3 (P49954)	0.0202741	0.00760292	3.05985e+06	2.96229e+06	0.968116	Probable hydrolase NIT3 OS=Saccharomyces cerevisiae (strain ATCC 204508 / S288c) GN=NIT3 PE=1 SV=1
P50946	OCA1 (P50946)	0.550738	0.12294	1.46566e+06	1.41821e+06	0.967626	Putative tyrosine-protein phosphatase OCA1 OS=Saccharomyces cerevisiae (strain ATCC 204508 / S288c) GN=OCA1 PE=1 SV=1
P06785	CDC21 (P06785)	0.682194	0.147177	1.84615e+06	1.78609e+06	0.967466	Thymidylate synthase OS=Saccharomyces cerevisiae (strain ATCC 204508 / S288c) GN=CDC21 PE=1 SV=1
P39007	STT3 (P39007)	0.244987	0.0627006	3.92091e+06	3.79316e+06	0.967417	Dolichyl-diphosphooligosaccharide--protein glycosyltransferase subunit STT3 OS=Saccharomyces cerevisiae (strain ATCC 204508 / S288c) GN=STT3 PE=1 SV=2
Q12166	LEU9 (Q12166)	0.0327079	0.0113968	2.43696e+06	2.35593e+06	0.966748	2-isopropylmalate synthase 2, mitochondrial OS=Saccharomyces cerevisiae (strain ATCC 204508 / S288c) GN=LEU9 PE=1 SV=1
P32561	RPD3 (P32561)	0.0162634	0.00629217	876020	846632	0.966453	Histone deacetylase RPD3 OS=Saccharomyces cerevisiae (strain ATCC 204508 / S288c) GN=RPD3 PE=1 SV=1
P32769	HBS1 (P32769)	0.943607	0.19323	2.76676e+06	2.67369e+06	0.96636	Elongation factor 1 alpha-like protein OS=Saccharomyces cerevisiae (strain ATCC 204508 / S288c) GN=HBS1 PE=1 SV=2
P40348	RFC2 (P40348)	0.69484	0.149227	1.2543e+06	1.21186e+06	0.966164	Replication factor C subunit 2 OS=Saccharomyces cerevisiae (strain ATCC 204508 / S288c) GN=RFC2 PE=1 SV=1
P06782	SNF1 (P06782)	0.729809	0.155444	2.35441e+06	2.27474e+06	0.966162	Carbon catabolite-derepressing protein kinase OS=Saccharomyces cerevisiae (strain ATCC 204508 / S288c) GN=SNF1 PE=1 SV=1
Q06406	LSM6 (Q06406)	0.0333231	0.011569	7.5725e+06	7.31471e+06	0.965957	U6 snRNA-associated Sm-like protein LSm6 OS=Saccharomyces cerevisiae (strain ATCC 204508 / S288c) GN=LSM6 PE=1 SV=2
P38181	NUP170 (P38181)	0.612802	0.134373	1.13435e+06	1.09498e+06	0.965294	Nucleoporin NUP170 OS=Saccharomyces cerevisiae (strain ATCC 204508 / S288c) GN=NUP170 PE=1 SV=1
P25655	CDC39 (P25655)	0.00781492	0.00332164	2.6716e+06	2.57842e+06	0.96512	General negative regulator of transcription subunit 1 OS=Saccharomyces cerevisiae (strain ATCC 204508 / S288c) GN=CDC39 PE=1 SV=3
P23293	SGV1 (P23293)	0.0124546	0.00500134	168082	162077	0.964268	Serine/threonine-protein kinase BUR1 OS=Saccharomyces cerevisiae (strain ATCC 204508 / S288c) GN=SGV1 PE=1 SV=1
P53235	YGR054W (P53235)	0.131002	0.0370736	9.27293e+06	8.94138e+06	0.964245	Eukaryotic translation initiation factor 2A OS=Saccharomyces cerevisiae (strain ATCC 204508 / S288c) GN=YGR054W PE=1 SV=1
P37254	ABZ1 (P37254)	0.988894	0.200601	455338	438916	0.963935	Aminodeoxychorismate synthase OS=Saccharomyces cerevisiae (strain ATCC 204508 / S288c) GN=ABZ1 PE=1 SV=4
P0C2H8	RPL31A (P0C2H8)	0.0346288	0.0119418	1.91066e+08	1.84131e+08	0.963703	60S ribosomal protein L31-A OS=Saccharomyces cerevisiae (strain ATCC 204508 / S288c) GN=RPL31A PE=1 SV=1
P0C2H9	RPL31B (P0C2H9)	0.0346288	0.0119418	4.62259e+07	4.4548e+07	0.963703	60S ribosomal protein L31-B OS=Saccharomyces cerevisiae (strain ATCC 204508 / S288c) GN=RPL31B PE=1 SV=1
Q12500	AVL9 (Q12500)	0.250514	0.0638949	504876	486430	0.963465	Late secretory pathway protein AVL9 OS=Saccharomyces cerevisiae (strain ATCC 204508 / S288c) GN=AVL9 PE=1 SV=1
P40356	PGD1 (P40356)	0.779427	0.164338	655764	631365	0.962794	Mediator of RNA polymerase II transcription subunit 3 OS=Saccharomyces cerevisiae (strain ATCC 204508 / S288c) GN=PGD1 PE=1 SV=2
P17883	SKI3 (P17883)	0.843196	0.175625	1.20708e+06	1.16136e+06	0.962124	Superkiller protein 3 OS=Saccharomyces cerevisiae (strain ATCC 204508 / S288c) GN=SKI3 PE=1 SV=2
P36024	SIS2 (P36024)	0.525886	0.118347	1.15894e+06	1.11495e+06	0.962043	Phosphopantothenoylcysteine decarboxylase subunit SIS2 OS=Saccharomyces cerevisiae (strain ATCC 204508 / S288c) GN=SIS2 PE=1 SV=1
P41807	VMA13 (P41807)	0.848832	0.176634	1.48215e+07	1.42581e+07	0.96199	V-type proton ATPase subunit H OS=Saccharomyces cerevisiae (strain ATCC 204508 / S288c) GN=VMA13 PE=1 SV=1
P25037	UBP1 (P25037)	0.38978	0.092965	2.24247e+06	2.15713e+06	0.961943	Ubiquitin carboxyl-terminal hydrolase 1 OS=Saccharomyces cerevisiae (strain ATCC 204508 / S288c) GN=UBP1 PE=1 SV=2
P38688	SRP72 (P38688)	0.300333	0.0744446	4.25893e+06	4.09644e+06	0.961847	Signal recognition particle subunit SRP72 OS=Saccharomyces cerevisiae (strain ATCC 204508 / S288c) GN=SRP72 PE=1 SV=2
P38272	SHE3 (P38272)	0.0811535	0.0247572	953582	916845	0.961474	SWI5-dependent HO expression protein 3 OS=Saccharomyces cerevisiae (strain ATCC 204508 / S288c) GN=SHE3 PE=1 SV=1
P53073	EMC4 (P53073)	0.915169	0.188561	1.2558e+06	1.20645e+06	0.960703	ER membrane protein complex subunit 4 OS=Saccharomyces cerevisiae (strain ATCC 204508 / S288c) GN=EMC4 PE=1 SV=1
P53090	ARO8 (P53090)	0.00285111	0.00140046	2.48255e+07	2.38348e+07	0.960094	Aromatic/aminoadipate aminotransferase 1 OS=Saccharomyces cerevisiae (strain ATCC 204508 / S288c) GN=ARO8 PE=1 SV=1
P53617	NRD1 (P53617)	0.325815	0.0796688	614536	589788	0.959729	Protein NRD1 OS=Saccharomyces cerevisiae (strain ATCC 204508 / S288c) GN=NRD1 PE=1 SV=1
P53946	ARP5 (P53946)	0.861592	0.178733	2.03564e+06	1.95354e+06	0.95967	Actin-related protein 5 OS=Saccharomyces cerevisiae (strain ATCC 204508 / S288c) GN=ARP5 PE=1 SV=1
P30822	CRM1 (P30822)	0.767885	0.162314	1.31672e+07	1.26347e+07	0.959559	Exportin-1 OS=Saccharomyces cerevisiae (strain ATCC 204508 / S288c) GN=CRM1 PE=1 SV=1
P09734	TUB3 (P09734)	0.0218449	0.0080877	1.15213e+07	1.10508e+07	0.959159	Tubulin alpha-3 chain OS=Saccharomyces cerevisiae (strain ATCC 204508 / S288c) GN=TUB3 PE=1 SV=1
P06701	SIR3 (P06701)	0.902871	0.186487	365786	350765	0.958934	Regulatory protein SIR3 OS=Saccharomyces cerevisiae (strain ATCC 204508 / S288c) GN=SIR3 PE=1 SV=6
P36081	YKL077W (P36081)	0.562044	0.125032	2.72788e+06	2.61575e+06	0.958894	Uncharacterized protein YKL077W OS=Saccharomyces cerevisiae (strain ATCC 204508 / S288c) GN=YKL077W PE=1 SV=1
P47089	TMA22 (P47089)	0.0358396	0.0122582	8.63391e+06	8.27702e+06	0.958665	Translation machinery-associated protein 22 OS=Saccharomyces cerevisiae (strain ATCC 204508 / S288c) GN=TMA22 PE=1 SV=1
Q05775	HCR1 (Q05775)	0.0138732	0.00550168	5.45701e+06	5.22936e+06	0.958282	Eukaryotic translation initiation factor 3 subunit J OS=Saccharomyces cerevisiae (strain ATCC 204508 / S288c) GN=HCR1 PE=1 SV=1
P46672	ARC1 (P46672)	0.371466	0.0891694	3.17506e+07	3.04212e+07	0.95813	tRNA-aminoacylation cofactor ARC1 OS=Saccharomyces cerevisiae (strain ATCC 204508 / S288c) GN=ARC1 PE=1 SV=2
Q04183	TRS120 (Q04183)	0.806007	0.168984	176680	169281	0.958122	Trafficking protein particle complex II-specific subunit 120 OS=Saccharomyces cerevisiae (strain ATCC 204508 / S288c) GN=TRS120 PE=1 SV=1
Q01477	UBP3 (Q01477)	0.437873	0.10186	3.93006e+06	3.76509e+06	0.958024	Ubiquitin carboxyl-terminal hydrolase 3 OS=Saccharomyces cerevisiae (strain ATCC 204508 / S288c) GN=UBP3 PE=1 SV=1
P32591	SWI3 (P32591)	0.0117212	0.00476402	751021	719484	0.958007	SWI/SNF complex subunit SWI3 OS=Saccharomyces cerevisiae (strain ATCC 204508 / S288c) GN=SWI3 PE=1 SV=1
P38256	YBR096W (P38256)	0.0689	0.0215989	2.89442e+06	2.77217e+06	0.957764	Uncharacterized protein YBR096W OS=Saccharomyces cerevisiae (strain ATCC 204508 / S288c) GN=YBR096W PE=1 SV=1
P54003	SUR7 (P54003)	0.444905	0.103278	1.9363e+06	1.85441e+06	0.95771	Protein SUR7 OS=Saccharomyces cerevisiae (strain ATCC 204508 / S288c) GN=SUR7 PE=1 SV=1
P46982	MNN5 (P46982)	0.416275	0.0978197	4.26869e+06	4.08679e+06	0.957386	Alpha-1,2-mannosyltransferase MNN5 OS=Saccharomyces cerevisiae (strain ATCC 204508 / S288c) GN=MNN5 PE=1 SV=2
P35194	UTP20 (P35194)	0.00261934	0.00130773	1.68077e+06	1.60867e+06	0.957103	U3 small nucleolar RNA-associated protein 20 OS=Saccharomyces cerevisiae (strain ATCC 204508 / S288c) GN=UTP20 PE=1 SV=3
Q01560	NPL3 (Q01560)	0.622437	0.136262	3.03524e+07	2.90417e+07	0.956817	Nucleolar protein 3 OS=Saccharomyces cerevisiae (strain ATCC 204508 / S288c) GN=NPL3 PE=1 SV=1
P46655	GUS1 (P46655)	0.503666	0.114301	4.38044e+07	4.18894e+07	0.956283	Glutamate--tRNA ligase, cytoplasmic OS=Saccharomyces cerevisiae (strain ATCC 204508 / S288c) GN=GUS1 PE=1 SV=3
Q99288	DET1 (Q99288)	0.46392	0.10706	1.24155e+06	1.18685e+06	0.955942	Broad-range acid phosphatase DET1 OS=Saccharomyces cerevisiae (strain ATCC 204508 / S288c) GN=DET1 PE=1 SV=1
Q07541	YDL121C (Q07541)	0.0207444	0.00775203	2.45627e+06	2.34675e+06	0.95541	Uncharacterized protein YDL121C OS=Saccharomyces cerevisiae (strain ATCC 204508 / S288c) GN=YDL121C PE=1 SV=1
P46682	APL6 (P46682)	0.423835	0.0992128	886859	846944	0.954993	AP-3 complex subunit beta OS=Saccharomyces cerevisiae (strain ATCC 204508 / S288c) GN=APL6 PE=1 SV=2
Q12400	TRM10 (Q12400)	0.00117778	0.000662997	515906	492414	0.954464	tRNA (guanine(9)-N1)-methyltransferase OS=Saccharomyces cerevisiae (strain ATCC 204508 / S288c) GN=TRM10 PE=1 SV=1
Q04951	SCW10 (Q04951)	0.0975278	0.0287432	1.72877e+06	1.64978e+06	0.954312	Probable family 17 glucosidase SCW10 OS=Saccharomyces cerevisiae (strain ATCC 204508 / S288c) GN=SCW10 PE=1 SV=1
P53091	MCM6 (P53091)	0.0771922	0.0237546	1.83056e+06	1.74693e+06	0.954311	DNA replication licensing factor MCM6 OS=Saccharomyces cerevisiae (strain ATCC 204508 / S288c) GN=MCM6 PE=1 SV=2
P41896	TFG2 (P41896)	0.940135	0.192696	604544	576849	0.954188	Transcription initiation factor IIF subunit beta OS=Saccharomyces cerevisiae (strain ATCC 204508 / S288c) GN=TFG2 PE=1 SV=2
Q3E764	TMA7 (Q3E764)	0.74264	0.157825	6.99173e+06	6.67037e+06	0.954037	Translation machinery-associated protein 7 OS=Saccharomyces cerevisiae (strain ATCC 204508 / S288c) GN=TMA7 PE=1 SV=1
P04801	THS1 (P04801)	0.0218351	0.0080877	3.86235e+07	3.68297e+07	0.953557	Threonine--tRNA ligase, cytoplasmic OS=Saccharomyces cerevisiae (strain ATCC 204508 / S288c) GN=THS1 PE=1 SV=2
P48582	BRO1 (P48582)	0.645138	0.140314	851752	812129	0.953481	Vacuolar-sorting protein BRO1 OS=Saccharomyces cerevisiae (strain ATCC 204508 / S288c) GN=BRO1 PE=1 SV=2
P33754	SEC66 (P33754)	0.173564	0.0469345	4.02114e+06	3.8333e+06	0.953287	Translocation protein SEC66 OS=Saccharomyces cerevisiae (strain ATCC 204508 / S288c) GN=SEC66 PE=1 SV=1
Q04067	TIF35 (Q04067)	1.93141e-05	2.08409e-05	2.31116e+07	2.20272e+07	0.953077	Eukaryotic translation initiation factor 3 subunit G OS=Saccharomyces cerevisiae (strain ATCC 204508 / S288c) GN=TIF35 PE=1 SV=1
P00359	TDH3 (P00359)	0.428851	0.100188	3.40975e+09	3.24825e+09	0.952637	Glyceraldehyde-3-phosphate dehydrogenase 3 OS=Saccharomyces cerevisiae (strain ATCC 204508 / S288c) GN=TDH3 PE=1 SV=3
P32525	ECM25 (P32525)	0.77556	0.163626	582506	554324	0.95162	Protein ECM25 OS=Saccharomyces cerevisiae (strain ATCC 204508 / S288c) GN=ECM25 PE=1 SV=2
Q12055	FAP7 (Q12055)	0.563717	0.125252	1.43031e+06	1.36091e+06	0.951474	Adenylate kinase isoenzyme 6 homolog FAP7 OS=Saccharomyces cerevisiae (strain ATCC 204508 / S288c) GN=FAP7 PE=1 SV=1
P40339	RFC4 (P40339)	0.626796	0.137075	1.46271e+06	1.39137e+06	0.951224	Replication factor C subunit 4 OS=Saccharomyces cerevisiae (strain ATCC 204508 / S288c) GN=RFC4 PE=1 SV=1
P0CX31		0.000377798	0.000251493	7.61256e+07	7.24038e+07	0.95111	40S ribosomal protein S24-A OS=Saccharomyces cerevisiae (strain ATCC 204508 / S288c) GN=RPS24A PE=1 SV=1
P49367	LYS4 (P49367)	0.0803184	0.0245472	4.56277e+06	4.33808e+06	0.950756	Homoaconitase, mitochondrial OS=Saccharomyces cerevisiae (strain ATCC 204508 / S288c) GN=LYS4 PE=1 SV=1
P53081	NIF3 (P53081)	0.685869	0.147779	6.09762e+06	5.79703e+06	0.950703	Putative GTP cyclohydrolase 1 type 2 OS=Saccharomyces cerevisiae (strain ATCC 204508 / S288c) GN=NIF3 PE=1 SV=1
P38199	HEK2 (P38199)	0.377068	0.0903195	3.80526e+06	3.61512e+06	0.950033	Heterogeneous nuclear rnp K-like protein 2 OS=Saccharomyces cerevisiae (strain ATCC 204508 / S288c) GN=HEK2 PE=1 SV=1
Q06142	KAP95 (Q06142)	0.00642268	0.00279742	1.25161e+07	1.18784e+07	0.949045	Importin subunit beta-1 OS=Saccharomyces cerevisiae (strain ATCC 204508 / S288c) GN=KAP95 PE=1 SV=1
Q08446	SGT1 (Q08446)	0.831496	0.173458	561300	532502	0.948695	Protein SGT1 OS=Saccharomyces cerevisiae (strain ATCC 204508 / S288c) GN=SGT1 PE=1 SV=1
Q00362	CDC55 (Q00362)	0.460555	0.106357	4.18442e+06	3.96953e+06	0.948647	Protein phosphatase PP2A regulatory subunit B OS=Saccharomyces cerevisiae (strain ATCC 204508 / S288c) GN=CDC55 PE=1 SV=2
P38732	EFM1 (P38732)	0.183609	0.0491739	1.65906e+06	1.57177e+06	0.947387	Protein-lysine N-methyltransferase EFM1 OS=Saccharomyces cerevisiae (strain ATCC 204508 / S288c) GN=EFM1 PE=1 SV=1
P35844	KES1 (P35844)	0.0696621	0.0217576	1.60224e+07	1.51754e+07	0.947132	Protein KES1 OS=Saccharomyces cerevisiae (strain ATCC 204508 / S288c) GN=KES1 PE=1 SV=1
P07280	RPS19A (P07280)	0.00074213	0.000447934	2.71405e+08	2.56922e+08	0.946636	40S ribosomal protein S19-A OS=Saccharomyces cerevisiae (strain ATCC 204508 / S288c) GN=RPS19A PE=1 SV=2
P13298	URA5 (P13298)	0.473414	0.108964	1.90075e+07	1.79884e+07	0.946383	Orotate phosphoribosyltransferase 1 OS=Saccharomyces cerevisiae (strain ATCC 204508 / S288c) GN=URA5 PE=1 SV=2
Q08269	ALR1 (Q08269)	0.311702	0.0768074	242869	229793	0.946159	Magnesium transporter ALR1 OS=Saccharomyces cerevisiae (strain ATCC 204508 / S288c) GN=ALR1 PE=1 SV=1
P43556	RGD2 (P43556)	0.286477	0.0714601	577034	545829	0.945921	Rho-GTPase-activating protein RGD2 OS=Saccharomyces cerevisiae (strain ATCC 204508 / S288c) GN=RGD2 PE=1 SV=1
P29496	MCM5 (P29496)	0.00523306	0.00235439	1.69981e+06	1.60768e+06	0.945805	Minichromosome maintenance protein 5 OS=Saccharomyces cerevisiae (strain ATCC 204508 / S288c) GN=MCM5 PE=1 SV=1
P40217	TIF34 (P40217)	0.00985181	0.00408616	2.79441e+07	2.64226e+07	0.945552	Eukaryotic translation initiation factor 3 subunit I OS=Saccharomyces cerevisiae (strain ATCC 204508 / S288c) GN=TIF34 PE=1 SV=1
KKA1_ECOLX		2.10498e-13	3.52064e-11	2.29237e+06	2.16718e+06	0.945392	KKA1_ECOLX
P53191	PIB2 (P53191)	0.264817	0.0670827	356911	337304	0.945066	Phosphatidylinositol 3-phosphate-binding protein 2 OS=Saccharomyces cerevisiae (strain ATCC 204508 / S288c) GN=PIB2 PE=1 SV=1
Q06063	DUS4 (Q06063)	0.0297906	0.0105117	448736	424074	0.94504	tRNA-dihydrouridine(20a/20b) synthase [NAD(P)+] OS=Saccharomyces cerevisiae (strain ATCC 204508 / S288c) GN=DUS4 PE=1 SV=1
P38712	RRP3 (P38712)	0.047158	0.0154805	3.09377e+06	2.92344e+06	0.944944	ATP-dependent rRNA helicase RRP3 OS=Saccharomyces cerevisiae (strain ATCC 204508 / S288c) GN=RRP3 PE=1 SV=2
P46957	POL31 (P46957)	0.976495	0.19899	194784	184050	0.944893	DNA polymerase delta small subunit OS=Saccharomyces cerevisiae (strain ATCC 204508 / S288c) GN=POL31 PE=1 SV=1
Q12017	PLP2 (Q12017)	0.484117	0.110766	1.4537e+06	1.37352e+06	0.944841	Phosducin-like protein 2 OS=Saccharomyces cerevisiae (strain ATCC 204508 / S288c) GN=PLP2 PE=1 SV=1
P32494	NGG1 (P32494)	0.848324	0.176583	220762	208525	0.944566	Chromatin-remodeling complexes subunit NGG1 OS=Saccharomyces cerevisiae (strain ATCC 204508 / S288c) GN=NGG1 PE=1 SV=1
P46992	YJL171C (P46992)	0.212278	0.0555186	4.9686e+06	4.68799e+06	0.943524	Cell wall protein YJL171C OS=Saccharomyces cerevisiae (strain ATCC 204508 / S288c) GN=YJL171C PE=1 SV=2
P53192	GET1 (P53192)	0.854442	0.17758	3.46245e+06	3.26623e+06	0.94333	Golgi to ER traffic protein 1 OS=Saccharomyces cerevisiae (strain ATCC 204508 / S288c) GN=GET1 PE=1 SV=1
Q03769	ENT5 (Q03769)	0.448903	0.103989	2.52255e+06	2.37773e+06	0.942588	Epsin-5 OS=Saccharomyces cerevisiae (strain ATCC 204508 / S288c) GN=ENT5 PE=1 SV=1
P38998	LYS1 (P38998)	0.153269	0.042415	8.13424e+06	7.66344e+06	0.94212	Saccharopine dehydrogenase [NAD(+), L-lysine-forming] OS=Saccharomyces cerevisiae (strain ATCC 204508 / S288c) GN=LYS1 PE=1 SV=3
P52488	UBA2 (P52488)	0.819799	0.171553	214557	202043	0.941675	Ubiquitin-activating enzyme E1-like OS=Saccharomyces cerevisiae (strain ATCC 204508 / S288c) GN=UBA2 PE=1 SV=1
P53890	BNI5 (P53890)	0.117137	0.0337595	3.50849e+06	3.30271e+06	0.941349	Bud neck protein 5 OS=Saccharomyces cerevisiae (strain ATCC 204508 / S288c) GN=BNI5 PE=1 SV=1
P39705	NUP60 (P39705)	0.0251308	0.00907817	2.54549e+06	2.39604e+06	0.941289	Nucleoporin NUP60 OS=Saccharomyces cerevisiae (strain ATCC 204508 / S288c) GN=NUP60 PE=1 SV=1
P34220	YBL055C (P34220)	0.111438	0.0323582	543285	511386	0.941285	Deoxyribonuclease Tat-D OS=Saccharomyces cerevisiae (strain ATCC 204508 / S288c) GN=YBL055C PE=1 SV=1
P48813	GNP1 (P48813)	0.464911	0.107215	2.92166e+06	2.7499e+06	0.941213	High-affinity glutamine permease OS=Saccharomyces cerevisiae (strain ATCC 204508 / S288c) GN=GNP1 PE=1 SV=2
Q12464	RVB2 (Q12464)	0.0837251	0.0253223	7.43437e+06	6.9941e+06	0.940779	RuvB-like protein 2 OS=Saccharomyces cerevisiae (strain ATCC 204508 / S288c) GN=RVB2 PE=1 SV=1
P00925	ENO2 (P00925)	0.194771	0.0515238	3.01968e+09	2.84024e+09	0.940576	Enolase 2 OS=Saccharomyces cerevisiae (strain ATCC 204508 / S288c) GN=ENO2 PE=1 SV=2
Q04013	YHM2 (Q04013)	0.436508	0.101646	1.26656e+07	1.19105e+07	0.94038	Citrate/oxoglutarate carrier protein OS=Saccharomyces cerevisiae (strain ATCC 204508 / S288c) GN=YHM2 PE=1 SV=1
P38758	TDA3 (P38758)	0.677119	0.146365	2.90024e+06	2.7263e+06	0.940027	Putative oxidoreductase TDA3 OS=Saccharomyces cerevisiae (strain ATCC 204508 / S288c) GN=TDA3 PE=1 SV=2
P39109	YCF1 (P39109)	0.199216	0.0524923	3.84387e+06	3.61304e+06	0.939947	Metal resistance protein YCF1 OS=Saccharomyces cerevisiae (strain ATCC 204508 / S288c) GN=YCF1 PE=1 SV=2
Q04636	POB3 (Q04636)	0.170838	0.0463661	7.62851e+06	7.16896e+06	0.939758	FACT complex subunit POB3 OS=Saccharomyces cerevisiae (strain ATCC 204508 / S288c) GN=POB3 PE=1 SV=1
P43123	QRI1 (P43123)	0.605983	0.133446	6.22889e+06	5.85273e+06	0.939611	UDP-N-acetylglucosamine pyrophosphorylase OS=Saccharomyces cerevisiae (strain ATCC 204508 / S288c) GN=QRI1 PE=1 SV=1
Q9URQ3	TAD3 (Q9URQ3)	0.0418354	0.0140012	235699	221366	0.939191	tRNA-specific adenosine deaminase subunit TAD3 OS=Saccharomyces cerevisiae (strain ATCC 204508 / S288c) GN=TAD3 PE=1 SV=1
P38787	PAN5 (P38787)	0.626968	0.137075	4.81437e+06	4.52076e+06	0.939014	2-dehydropantoate 2-reductase OS=Saccharomyces cerevisiae (strain ATCC 204508 / S288c) GN=PAN5 PE=1 SV=1
Q12445	POM34 (Q12445)	0.540134	0.120901	721000	676570	0.938377	Nucleoporin POM34 OS=Saccharomyces cerevisiae (strain ATCC 204508 / S288c) GN=POM34 PE=1 SV=1
Q08723	RPN8 (Q08723)	0.32291	0.079161	8.57558e+06	8.04613e+06	0.938261	26S proteasome regulatory subunit RPN8 OS=Saccharomyces cerevisiae (strain ATCC 204508 / S288c) GN=RPN8 PE=1 SV=3
P12612	TCP1 (P12612)	0.0555923	0.0178893	1.5302e+07	1.43567e+07	0.938224	T-complex protein 1 subunit alpha OS=Saccharomyces cerevisiae (strain ATCC 204508 / S288c) GN=TCP1 PE=1 SV=2
Q02804	ARL3 (Q02804)	0.0933262	0.0277031	529465	496512	0.937763	ADP-ribosylation factor-like protein 3 OS=Saccharomyces cerevisiae (strain ATCC 204508 / S288c) GN=ARL3 PE=1 SV=1
Q05583	CIA1 (Q05583)	0.715991	0.152793	547194	512806	0.937156	Cytosolic iron-sulfur protein assembly protein 1 OS=Saccharomyces cerevisiae (strain ATCC 204508 / S288c) GN=CIA1 PE=1 SV=1
Q03178	PIR1 (Q03178)	0.020858	0.00778694	6.17466e+06	5.78651e+06	0.937139	Cell wall mannoprotein PIR1 OS=Saccharomyces cerevisiae (strain ATCC 204508 / S288c) GN=PIR1 PE=1 SV=1
P27692	SPT5 (P27692)	0.0025964	0.00130114	6.08599e+06	5.70334e+06	0.937126	Transcription elongation factor SPT5 OS=Saccharomyces cerevisiae (strain ATCC 204508 / S288c) GN=SPT5 PE=1 SV=1
P29469	MCM2 (P29469)	0.417963	0.098113	904315	847009	0.936631	DNA replication licensing factor MCM2 OS=Saccharomyces cerevisiae (strain ATCC 204508 / S288c) GN=MCM2 PE=1 SV=2
P40413	CCT5 (P40413)	0.0718981	0.0223308	2.31623e+07	2.16876e+07	0.936333	T-complex protein 1 subunit epsilon OS=Saccharomyces cerevisiae (strain ATCC 204508 / S288c) GN=CCT5 PE=1 SV=3
P40970	LCB2 (P40970)	0.0841966	0.0253961	7.55315e+06	7.07215e+06	0.936319	Serine palmitoyltransferase 2 OS=Saccharomyces cerevisiae (strain ATCC 204508 / S288c) GN=LCB2 PE=1 SV=1
P39926	SSO2 (P39926)	0.544408	0.12173	7.2212e+06	6.7602e+06	0.936161	Protein SSO2 OS=Saccharomyces cerevisiae (strain ATCC 204508 / S288c) GN=SSO2 PE=1 SV=2
P32495	NHP2 (P32495)	2.8059e-06	4.33528e-06	4.97036e+06	4.6525e+06	0.936048	H/ACA ribonucleoprotein complex subunit 2 OS=Saccharomyces cerevisiae (strain ATCC 204508 / S288c) GN=NHP2 PE=1 SV=2
P32563	VPH1 (P32563)	0.864312	0.179186	1.63072e+07	1.52631e+07	0.935975	V-type proton ATPase subunit a, vacuolar isoform OS=Saccharomyces cerevisiae (strain ATCC 204508 / S288c) GN=VPH1 PE=1 SV=3
P39015	STM1 (P39015)	0.000851665	0.000504224	2.61603e+08	2.44834e+08	0.935898	Suppressor protein STM1 OS=Saccharomyces cerevisiae (strain ATCC 204508 / S288c) GN=STM1 PE=1 SV=3
Q08920	CBC2 (Q08920)	0.376313	0.0902033	1.11285e+06	1.04122e+06	0.935641	Nuclear cap-binding protein subunit 2 OS=Saccharomyces cerevisiae (strain ATCC 204508 / S288c) GN=CBC2 PE=1 SV=1
P0CX84		0.339806	0.0826068	1.24561e+08	1.16334e+08	0.933954	60S ribosomal protein L35-A OS=Saccharomyces cerevisiae (strain ATCC 204508 / S288c) GN=RPL35A PE=1 SV=1
P47008	SFH5 (P47008)	0.75505	0.160144	5.32587e+06	4.96945e+06	0.933078	Phosphatidylinositol transfer protein SFH5 OS=Saccharomyces cerevisiae (strain ATCC 204508 / S288c) GN=SFH5 PE=1 SV=1
P07284	SES1 (P07284)	0.0962376	0.0284256	7.70373e+07	7.18211e+07	0.93229	Serine--tRNA ligase, cytoplasmic OS=Saccharomyces cerevisiae (strain ATCC 204508 / S288c) GN=SES1 PE=1 SV=2
Q02642	EGD1 (Q02642)	0.385888	0.0921683	9.76709e+07	9.1025e+07	0.931956	Nascent polypeptide-associated complex subunit beta-1 OS=Saccharomyces cerevisiae (strain ATCC 204508 / S288c) GN=EGD1 PE=1 SV=2
P53868	ALG9 (P53868)	0.0345971	0.0119418	3.11639e+06	2.90389e+06	0.931813	Alpha-1,2-mannosyltransferase ALG9 OS=Saccharomyces cerevisiae (strain ATCC 204508 / S288c) GN=ALG9 PE=1 SV=1
P15790	CKA1 (P15790)	0.682107	0.147177	1.57929e+06	1.47052e+06	0.931131	Casein kinase II subunit alpha OS=Saccharomyces cerevisiae (strain ATCC 204508 / S288c) GN=CKA1 PE=1 SV=1
P53121	FLC3 (P53121)	0.274149	0.0689765	1.02687e+06	955547	0.930547	Putative flavin carrier protein 3 OS=Saccharomyces cerevisiae (strain ATCC 204508 / S288c) GN=FLC3 PE=1 SV=1
P52917	VPS4 (P52917)	0.977616	0.199037	825927	768538	0.930516	Vacuolar protein sorting-associated protein 4 OS=Saccharomyces cerevisiae (strain ATCC 204508 / S288c) GN=VPS4 PE=1 SV=1
P16862	PFK2 (P16862)	0.00407318	0.00189817	7.77244e+07	7.22605e+07	0.929701	ATP-dependent 6-phosphofructokinase subunit beta OS=Saccharomyces cerevisiae (strain ATCC 204508 / S288c) GN=PFK2 PE=1 SV=4
P11433	CDC24 (P11433)	0.759676	0.160828	582391	541421	0.929652	Cell division control protein 24 OS=Saccharomyces cerevisiae (strain ATCC 204508 / S288c) GN=CDC24 PE=1 SV=2
P23638	PRE9 (P23638)	0.700528	0.150212	7.93462e+06	7.37554e+06	0.929538	Proteasome subunit alpha type-3 OS=Saccharomyces cerevisiae (strain ATCC 204508 / S288c) GN=PRE9 PE=1 SV=1
P38131	KTR4 (P38131)	0.00233377	0.00118912	2.14186e+06	1.99088e+06	0.92951	Probable mannosyltransferase KTR4 OS=Saccharomyces cerevisiae (strain ATCC 204508 / S288c) GN=KTR4 PE=1 SV=1
Q04600	TMA64 (Q04600)	0.118137	0.0340081	1.34348e+06	1.24841e+06	0.929239	Translation machinery-associated protein 64 OS=Saccharomyces cerevisiae (strain ATCC 204508 / S288c) GN=TMA64 PE=1 SV=1
P42943	CCT7 (P42943)	0.0144081	0.00568014	1.18616e+07	1.10197e+07	0.929023	T-complex protein 1 subunit eta OS=Saccharomyces cerevisiae (strain ATCC 204508 / S288c) GN=CCT7 PE=1 SV=1
P38875	GPI16 (P38875)	0.465727	0.107366	1.1778e+06	1.09346e+06	0.92839	GPI transamidase component GPI16 OS=Saccharomyces cerevisiae (strain ATCC 204508 / S288c) GN=GPI16 PE=1 SV=2
P10592	SSA2 (P10592)	0.130975	0.0370736	3.38957e+08	3.14589e+08	0.928108	Heat shock protein SSA2 OS=Saccharomyces cerevisiae (strain ATCC 204508 / S288c) GN=SSA2 PE=1 SV=3
P38837	NSG1 (P38837)	1.26487e-05	1.43914e-05	2.10764e+06	1.95602e+06	0.928062	Protein NSG1 OS=Saccharomyces cerevisiae (strain ATCC 204508 / S288c) GN=NSG1 PE=1 SV=1
P13186	KIN2 (P13186)	0.941954	0.192951	424962	394375	0.928025	Serine/threonine-protein kinase KIN2 OS=Saccharomyces cerevisiae (strain ATCC 204508 / S288c) GN=KIN2 PE=1 SV=3
P25343	RVS161 (P25343)	0.0191924	0.00724602	8.15509e+06	7.56429e+06	0.927554	Reduced viability upon starvation protein 161 OS=Saccharomyces cerevisiae (strain ATCC 204508 / S288c) GN=RVS161 PE=1 SV=1
Q12072	IOC2 (Q12072)	0.605081	0.133335	426393	395342	0.927176	ISWI one complex protein 2 OS=Saccharomyces cerevisiae (strain ATCC 204508 / S288c) GN=IOC2 PE=1 SV=1
P37297	STT4 (P37297)	0.0155229	0.00605538	1.22517e+06	1.13584e+06	0.927087	Phosphatidylinositol 4-kinase STT4 OS=Saccharomyces cerevisiae (strain ATCC 204508 / S288c) GN=STT4 PE=1 SV=1
P25656	CDC50 (P25656)	0.473473	0.108964	515027	477453	0.927044	Cell division control protein 50 OS=Saccharomyces cerevisiae (strain ATCC 204508 / S288c) GN=CDC50 PE=1 SV=1
P25847	MSH2 (P25847)	0.849281	0.176649	403369	373346	0.92557	DNA mismatch repair protein MSH2 OS=Saccharomyces cerevisiae (strain ATCC 204508 / S288c) GN=MSH2 PE=1 SV=2
P38628	PCM1 (P38628)	0.415035	0.0976311	8.37831e+06	7.74952e+06	0.92495	Phosphoacetylglucosamine mutase OS=Saccharomyces cerevisiae (strain ATCC 204508 / S288c) GN=PCM1 PE=1 SV=2
P38630	RFC1 (P38630)	0.276417	0.0693646	1.1448e+06	1.05771e+06	0.923921	Replication factor C subunit 1 OS=Saccharomyces cerevisiae (strain ATCC 204508 / S288c) GN=RFC1 PE=1 SV=1
P38756	YHR003C (P38756)	0.00685375	0.00296204	1.56151e+06	1.44242e+06	0.923732	tRNA threonylcarbamoyladenosine dehydratase 1 OS=Saccharomyces cerevisiae (strain ATCC 204508 / S288c) GN=TCD1 PE=1 SV=1
P12962	CAF20 (P12962)	0.0165234	0.00638241	1.35377e+07	1.2505e+07	0.923717	Cap-associated protein CAF20 OS=Saccharomyces cerevisiae (strain ATCC 204508 / S288c) GN=CAF20 PE=1 SV=2
P10081		0.00938774	0.00391553	2.11054e+08	1.9478e+08	0.92289	ATP-dependent RNA helicase eIF4A OS=Saccharomyces cerevisiae (strain ATCC 204508 / S288c) GN=TIF1 PE=1 SV=3
P31116	HOM6 (P31116)	0.498282	0.113425	7.74938e+07	7.15144e+07	0.92284	Homoserine dehydrogenase OS=Saccharomyces cerevisiae (strain ATCC 204508 / S288c) GN=HOM6 PE=1 SV=1
Q08641	ABP140 (Q08641)	0.037054	0.0126087	1.3666e+07	1.2611e+07	0.922798	tRNA(Thr) (cytosine(32)-N(3))-methyltransferase OS=Saccharomyces cerevisiae (strain ATCC 204508 / S288c) GN=ABP140 PE=1 SV=3
P38707	DED81 (P38707)	0.00327266	0.00156949	6.32233e+07	5.83342e+07	0.922668	Asparagine--tRNA ligase, cytoplasmic OS=Saccharomyces cerevisiae (strain ATCC 204508 / S288c) GN=DED81 PE=1 SV=1
O13297	CET1 (O13297)	0.360812	0.08683	4.1592e+06	3.83622e+06	0.922346	mRNA-capping enzyme subunit beta OS=Saccharomyces cerevisiae (strain ATCC 204508 / S288c) GN=CET1 PE=1 SV=2
P53438	SOK2 (P53438)	0.353889	0.0853174	666996	615035	0.922097	Protein SOK2 OS=Saccharomyces cerevisiae (strain ATCC 204508 / S288c) GN=SOK2 PE=1 SV=1
P32501	GCD6 (P32501)	0.123052	0.0351657	4.16084e+06	3.8351e+06	0.921713	Translation initiation factor eIF-2B subunit epsilon OS=Saccharomyces cerevisiae (strain ATCC 204508 / S288c) GN=GCD6 PE=1 SV=1
P38999	LYS9 (P38999)	0.69079	0.148692	1.16025e+07	1.06929e+07	0.921605	Saccharopine dehydrogenase [NADP(+), L-glutamate-forming] OS=Saccharomyces cerevisiae (strain ATCC 204508 / S288c) GN=LYS9 PE=1 SV=1
Q99189	MTR10 (Q99189)	0.888663	0.183722	487952	448974	0.920119	mRNA transport regulator MTR10 OS=Saccharomyces cerevisiae (strain ATCC 204508 / S288c) GN=MTR10 PE=1 SV=1
P39010	AKR1 (P39010)	0.269427	0.0681217	4.71186e+06	4.33519e+06	0.920059	Palmitoyltransferase AKR1 OS=Saccharomyces cerevisiae (strain ATCC 204508 / S288c) GN=AKR1 PE=1 SV=1
P25294	SIS1 (P25294)	0.287044	0.0715749	2.66645e+07	2.45252e+07	0.91977	Protein SIS1 OS=Saccharomyces cerevisiae (strain ATCC 204508 / S288c) GN=SIS1 PE=1 SV=1
P53196	RPN14 (P53196)	0.19377	0.051381	119133	109496	0.919109	26S proteasome regulatory subunit RPN14 OS=Saccharomyces cerevisiae (strain ATCC 204508 / S288c) GN=RPN14 PE=1 SV=1
P12383	PDR1 (P12383)	0.193737	0.051381	283947	260948	0.919001	Transcription factor PDR1 OS=Saccharomyces cerevisiae (strain ATCC 204508 / S288c) GN=PDR1 PE=1 SV=2
P38318	YBR220C (P38318)	0.639483	0.139355	1.08827e+06	999762	0.918675	Uncharacterized membrane protein YBR220C OS=Saccharomyces cerevisiae (strain ATCC 204508 / S288c) GN=YBR220C PE=1 SV=1
P38251	RFC5 (P38251)	0.575619	0.127642	1.9841e+06	1.8227e+06	0.918653	Replication factor C subunit 5 OS=Saccharomyces cerevisiae (strain ATCC 204508 / S288c) GN=RFC5 PE=1 SV=1
P32377	MVD1 (P32377)	0.324126	0.0793894	1.48154e+07	1.36041e+07	0.918241	Diphosphomevalonate decarboxylase OS=Saccharomyces cerevisiae (strain ATCC 204508 / S288c) GN=MVD1 PE=1 SV=2
P38701	RPS20 (P38701)	0.053324	0.017259	2.16205e+08	1.98488e+08	0.918056	40S ribosomal protein S20 OS=Saccharomyces cerevisiae (strain ATCC 204508 / S288c) GN=RPS20 PE=1 SV=3
Q06107	YPR114W (Q06107)	0.987626	0.200465	1.41035e+06	1.29465e+06	0.917963	Uncharacterized TLC domain-containing protein YPR114W OS=Saccharomyces cerevisiae (strain ATCC 204508 / S288c) GN=YPR114W PE=1 SV=1
P22213	SLY1 (P22213)	0.16583	0.0452088	3.54653e+06	3.25549e+06	0.917939	Protein SLY1 OS=Saccharomyces cerevisiae (strain ATCC 204508 / S288c) GN=SLY1 PE=1 SV=1
P32832	NPL6 (P32832)	0.341832	0.0829611	1.51129e+06	1.38704e+06	0.917787	Chromatin structure-remodeling complex subunit RSC7 OS=Saccharomyces cerevisiae (strain ATCC 204508 / S288c) GN=NPL6 PE=1 SV=1
P16474	KAR2 (P16474)	0.00376782	0.0017764	4.48861e+07	4.11881e+07	0.917614	78 kDa glucose-regulated protein homolog OS=Saccharomyces cerevisiae (strain ATCC 204508 / S288c) GN=KAR2 PE=1 SV=1
P40047	ALD5 (P40047)	0.0239694	0.00872933	7.03673e+06	6.45599e+06	0.917469	Aldehyde dehydrogenase 5, mitochondrial OS=Saccharomyces cerevisiae (strain ATCC 204508 / S288c) GN=ALD5 PE=1 SV=4
P48589	RPS12 (P48589)	0.000627747	0.000388501	1.84911e+08	1.69637e+08	0.917398	40S ribosomal protein S12 OS=Saccharomyces cerevisiae (strain ATCC 204508 / S288c) GN=RPS12 PE=1 SV=1
P38604	ERG7 (P38604)	0.0212086	0.00790022	667195	612009	0.917286	Lanosterol synthase OS=Saccharomyces cerevisiae (strain ATCC 204508 / S288c) GN=ERG7 PE=1 SV=6
P33296	UBC6 (P33296)	0.0241519	0.00878624	1.44384e+06	1.32308e+06	0.916357	Ubiquitin-conjugating enzyme E2 6 OS=Saccharomyces cerevisiae (strain ATCC 204508 / S288c) GN=UBC6 PE=1 SV=1
P24280	SEC14 (P24280)	0.0160899	0.00623657	2.76649e+07	2.53392e+07	0.915932	SEC14 cytosolic factor OS=Saccharomyces cerevisiae (strain ATCC 204508 / S288c) GN=SEC14 PE=1 SV=3
Q06704	IMH1 (Q06704)	0.276061	0.0693014	976536	894333	0.915821	Golgin IMH1 OS=Saccharomyces cerevisiae (strain ATCC 204508 / S288c) GN=IMH1 PE=1 SV=1
P41543	OST1 (P41543)	0.00342432	0.00163403	6.62153e+06	6.06109e+06	0.915361	Dolichyl-diphosphooligosaccharide--protein glycosyltransferase subunit 1 OS=Saccharomyces cerevisiae (strain ATCC 204508 / S288c) GN=OST1 PE=1 SV=1
P08964	MYO1 (P08964)	0.0895827	0.0267433	849081	777030	0.915142	Myosin-1 OS=Saccharomyces cerevisiae (strain ATCC 204508 / S288c) GN=MYO1 PE=1 SV=3
Q12178	FCY1 (Q12178)	0.0148782	0.00583794	9.78753e+06	8.94559e+06	0.913978	Cytosine deaminase OS=Saccharomyces cerevisiae (strain ATCC 204508 / S288c) GN=FCY1 PE=1 SV=1
P39993	GEA2 (P39993)	0.00583346	0.00258283	1.34332e+06	1.22744e+06	0.913736	ARF guanine-nucleotide exchange factor 2 OS=Saccharomyces cerevisiae (strain ATCC 204508 / S288c) GN=GEA2 PE=1 SV=1
P28777	ARO2 (P28777)	0.0595146	0.0189961	2.06864e+07	1.8887e+07	0.913016	Chorismate synthase OS=Saccharomyces cerevisiae (strain ATCC 204508 / S288c) GN=ARO2 PE=1 SV=1
P32492	MYO4 (P32492)	0.0944653	0.0279515	1.4665e+06	1.33852e+06	0.912734	Myosin-4 OS=Saccharomyces cerevisiae (strain ATCC 204508 / S288c) GN=MYO4 PE=1 SV=1
P40029	MXR1 (P40029)	0.0244412	0.00886255	624022	569529	0.912674	Peptide methionine sulfoxide reductase OS=Saccharomyces cerevisiae (strain ATCC 204508 / S288c) GN=MXR1 PE=1 SV=1
P38737	ECM29 (P38737)	0.291291	0.0724989	1.21231e+06	1.10628e+06	0.912536	Proteasome component ECM29 OS=Saccharomyces cerevisiae (strain ATCC 204508 / S288c) GN=ECM29 PE=1 SV=1
Q07457	BRE1 (Q07457)	0.308859	0.0762192	1.79422e+06	1.63704e+06	0.912399	E3 ubiquitin-protein ligase BRE1 OS=Saccharomyces cerevisiae (strain ATCC 204508 / S288c) GN=BRE1 PE=1 SV=1
P32794	AFG2 (P32794)	0.311526	0.0768074	1.93146e+06	1.76224e+06	0.912388	ATPase family gene 2 protein OS=Saccharomyces cerevisiae (strain ATCC 204508 / S288c) GN=AFG2 PE=1 SV=1
Q03784	TRS23 (Q03784)	0.517167	0.11677	718149	654782	0.911764	Trafficking protein particle complex subunit 23 OS=Saccharomyces cerevisiae (strain ATCC 204508 / S288c) GN=TRS23 PE=1 SV=1
P40467	ASG1 (P40467)	0.00261655	0.00130732	1.04968e+06	956853	0.911564	Activator of stress genes 1 OS=Saccharomyces cerevisiae (strain ATCC 204508 / S288c) GN=ASG1 PE=1 SV=1
P02407	RPS17A (P02407)	0.0879622	0.0263536	2.89579e+08	2.63944e+08	0.911475	40S ribosomal protein S17-A OS=Saccharomyces cerevisiae (strain ATCC 204508 / S288c) GN=RPS17A PE=1 SV=1
Q02206	RSC4 (Q02206)	0.341883	0.0829611	1.04351e+06	950898	0.911246	Chromatin structure-remodeling complex subunit RSC4 OS=Saccharomyces cerevisiae (strain ATCC 204508 / S288c) GN=RSC4 PE=1 SV=2
Q03834	MSH6 (Q03834)	0.498811	0.113468	1.51239e+06	1.37816e+06	0.911244	DNA mismatch repair protein MSH6 OS=Saccharomyces cerevisiae (strain ATCC 204508 / S288c) GN=MSH6 PE=1 SV=1
P37292	SHM1 (P37292)	0.147666	0.04106	2.69487e+07	2.45538e+07	0.911133	Serine hydroxymethyltransferase, mitochondrial OS=Saccharomyces cerevisiae (strain ATCC 204508 / S288c) GN=SHM1 PE=1 SV=2
P34087	RPB7 (P34087)	0.860986	0.178718	4.50432e+06	4.10381e+06	0.911083	DNA-directed RNA polymerase II subunit RPB7 OS=Saccharomyces cerevisiae (strain ATCC 204508 / S288c) GN=RPB7 PE=1 SV=1
P40161	RTT106 (P40161)	0.448783	0.103989	646792	589269	0.911064	Histone chaperone RTT106 OS=Saccharomyces cerevisiae (strain ATCC 204508 / S288c) GN=RTT106 PE=1 SV=1
P43593	UBP6 (P43593)	0.057516	0.0184462	7.25293e+06	6.60615e+06	0.910824	Ubiquitin carboxyl-terminal hydrolase 6 OS=Saccharomyces cerevisiae (strain ATCC 204508 / S288c) GN=UBP6 PE=1 SV=1
P32452	PHA2 (P32452)	0.63698	0.138991	225710	205567	0.910759	Putative prephenate dehydratase OS=Saccharomyces cerevisiae (strain ATCC 204508 / S288c) GN=PHA2 PE=1 SV=3
P38626	CBR1 (P38626)	0.167446	0.0455749	9.90241e+06	9.01422e+06	0.910306	NADH-cytochrome b5 reductase 1 OS=Saccharomyces cerevisiae (strain ATCC 204508 / S288c) GN=CBR1 PE=1 SV=2
P21269	CCA1 (P21269)	0.52893	0.118865	659615	600387	0.910209	CCA tRNA nucleotidyltransferase, mitochondrial OS=Saccharomyces cerevisiae (strain ATCC 204508 / S288c) GN=CCA1 PE=1 SV=1
P24521	ERG8 (P24521)	0.422535	0.0989431	713456	648832	0.909421	Phosphomevalonate kinase OS=Saccharomyces cerevisiae (strain ATCC 204508 / S288c) GN=ERG8 PE=1 SV=2
Q07478	SUB2 (Q07478)	0.182338	0.0489511	5.20521e+07	4.73154e+07	0.909002	ATP-dependent RNA helicase SUB2 OS=Saccharomyces cerevisiae (strain ATCC 204508 / S288c) GN=SUB2 PE=1 SV=1
Q03790	NUP53 (Q03790)	0.0843576	0.0254331	1.55523e+06	1.41354e+06	0.908897	Nucleoporin NUP53 OS=Saccharomyces cerevisiae (strain ATCC 204508 / S288c) GN=NUP53 PE=1 SV=1
P53930	YAF9 (P53930)	0.16874	0.0458711	281858	256170	0.908862	Protein AF-9 homolog OS=Saccharomyces cerevisiae (strain ATCC 204508 / S288c) GN=YAF9 PE=1 SV=1
P02994		0.157305	0.0433235	3.32764e+09	3.02241e+09	0.908276	Elongation factor 1-alpha OS=Saccharomyces cerevisiae (strain ATCC 204508 / S288c) GN=TEF1 PE=1 SV=1
P46971	PMT4 (P46971)	0.0857122	0.0257603	4.82602e+06	4.3828e+06	0.90816	Dolichyl-phosphate-mannose--protein mannosyltransferase 4 OS=Saccharomyces cerevisiae (strain ATCC 204508 / S288c) GN=PMT4 PE=1 SV=1
P53738	TRM112 (P53738)	0.0011811	0.00066401	3.41568e+06	3.10144e+06	0.908	Multifunctional methyltransferase subunit TRM112 OS=Saccharomyces cerevisiae (strain ATCC 204508 / S288c) GN=TRM112 PE=1 SV=1
Q08229	NBA1 (Q08229)	0.70093	0.15025	1.38683e+06	1.25866e+06	0.90758	Protein NBA1 OS=Saccharomyces cerevisiae (strain ATCC 204508 / S288c) GN=NBA1 PE=1 SV=1
P40185	MMF1 (P40185)	0.0307104	0.0107885	6.19645e+07	5.6217e+07	0.907245	Protein MMF1, mitochondrial OS=Saccharomyces cerevisiae (strain ATCC 204508 / S288c) GN=MMF1 PE=1 SV=1
P39938	RPS26A (P39938)	0.000100329	8.2357e-05	1.76224e+08	1.59848e+08	0.907075	40S ribosomal protein S26-A OS=Saccharomyces cerevisiae (strain ATCC 204508 / S288c) GN=RPS26A PE=1 SV=1
P06168	ILV5 (P06168)	0.00039926	0.000262129	1.3364e+08	1.21141e+08	0.906472	Ketol-acid reductoisomerase, mitochondrial OS=Saccharomyces cerevisiae (strain ATCC 204508 / S288c) GN=ILV5 PE=1 SV=1
P32389	MET4 (P32389)	0.934303	0.191736	252564	228721	0.905596	Transcriptional activator of sulfur metabolism MET4 OS=Saccharomyces cerevisiae (strain ATCC 204508 / S288c) GN=MET4 PE=1 SV=2
P33753	TRM2 (P33753)	0.00458674	0.00210609	506922	459029	0.905521	tRNA (uracil(54)-C(5))-methyltransferase OS=Saccharomyces cerevisiae (strain ATCC 204508 / S288c) GN=TRM2 PE=1 SV=2
P09620	KEX1 (P09620)	0.00739162	0.00315728	2.32951e+06	2.10938e+06	0.905505	Pheromone-processing carboxypeptidase KEX1 OS=Saccharomyces cerevisiae (strain ATCC 204508 / S288c) GN=KEX1 PE=1 SV=1
P06704	CDC31 (P06704)	0.482335	0.110434	1.10196e+06	997600	0.905298	Cell division control protein 31 OS=Saccharomyces cerevisiae (strain ATCC 204508 / S288c) GN=CDC31 PE=1 SV=2
P43586	LOC1 (P43586)	0.0119585	0.00483698	3.52081e+06	3.18699e+06	0.905188	60S ribosomal subunit assembly/export protein LOC1 OS=Saccharomyces cerevisiae (strain ATCC 204508 / S288c) GN=LOC1 PE=1 SV=1
P26786	RPS7A (P26786)	0.0590295	0.0188683	3.63892e+08	3.29236e+08	0.904763	40S ribosomal protein S7-A OS=Saccharomyces cerevisiae (strain ATCC 204508 / S288c) GN=RPS7A PE=1 SV=4
P46984	GON7 (P46984)	0.829212	0.173036	1.14442e+06	1.0354e+06	0.904737	EKC/KEOPS complex subunit GON7 OS=Saccharomyces cerevisiae (strain ATCC 204508 / S288c) GN=GON7 PE=1 SV=1
O14467	MBF1 (O14467)	0.637682	0.139099	3.71184e+07	3.35673e+07	0.90433	Multiprotein-bridging factor 1 OS=Saccharomyces cerevisiae (strain ATCC 204508 / S288c) GN=MBF1 PE=1 SV=2
P40089	LSM5 (P40089)	0.60666	0.133551	1.85961e+06	1.67908e+06	0.902921	U6 snRNA-associated Sm-like protein LSm5 OS=Saccharomyces cerevisiae (strain ATCC 204508 / S288c) GN=LSM5 PE=1 SV=1
Q06385	VPS74 (Q06385)	0.0621035	0.019719	3.09404e+06	2.7911e+06	0.902089	Vacuolar protein sorting-associated protein 74 OS=Saccharomyces cerevisiae (strain ATCC 204508 / S288c) GN=VPS74 PE=1 SV=1
P39078	CCT4 (P39078)	0.00255486	0.00128128	1.26722e+07	1.14227e+07	0.901393	T-complex protein 1 subunit delta OS=Saccharomyces cerevisiae (strain ATCC 204508 / S288c) GN=CCT4 PE=1 SV=2
Q06010	STE23 (Q06010)	0.189159	0.0503834	1.30493e+06	1.17618e+06	0.901336	A-factor-processing enzyme OS=Saccharomyces cerevisiae (strain ATCC 204508 / S288c) GN=STE23 PE=1 SV=2
P22023	KRE5 (P22023)	0.15016	0.0416324	562100	506542	0.90116	Killer toxin-resistance protein 5 OS=Saccharomyces cerevisiae (strain ATCC 204508 / S288c) GN=KRE5 PE=1 SV=2
P46683	YAR1 (P46683)	1.3925e-05	1.56834e-05	8.12152e+06	7.31787e+06	0.901047	Ankyrin repeat-containing protein YAR1 OS=Saccharomyces cerevisiae (strain ATCC 204508 / S288c) GN=YAR1 PE=1 SV=1
P47054	NUP192 (P47054)	0.434355	0.10125	1.16788e+06	1.05232e+06	0.901047	Nucleoporin NUP192 OS=Saccharomyces cerevisiae (strain ATCC 204508 / S288c) GN=NUP192 PE=1 SV=1
P53633	YIP3 (P53633)	0.0993017	0.0291633	3.42617e+06	3.08462e+06	0.90031	Prenylated Rab acceptor 1 OS=Saccharomyces cerevisiae (strain ATCC 204508 / S288c) GN=YIP3 PE=1 SV=2
P40312	CYB5 (P40312)	0.257788	0.0654756	1.95042e+06	1.75531e+06	0.899965	Cytochrome b5 OS=Saccharomyces cerevisiae (strain ATCC 204508 / S288c) GN=CYB5 PE=1 SV=2
P26784	RPL16A (P26784)	0.0101276	0.00419535	6.72754e+07	6.05265e+07	0.899683	60S ribosomal protein L16-A OS=Saccharomyces cerevisiae (strain ATCC 204508 / S288c) GN=RPL16A PE=1 SV=3
P32791	FRE1 (P32791)	0.20405	0.053576	5.39019e+06	4.84851e+06	0.899506	Ferric/cupric reductase transmembrane component 1 OS=Saccharomyces cerevisiae (strain ATCC 204508 / S288c) GN=FRE1 PE=1 SV=1
P39076	CCT2 (P39076)	0.0431953	0.0143915	1.60275e+07	1.44124e+07	0.89923	T-complex protein 1 subunit beta OS=Saccharomyces cerevisiae (strain ATCC 204508 / S288c) GN=CCT2 PE=1 SV=1
P53332	CAB4 (P53332)	0.843894	0.175716	689630	620038	0.899087	Phosphopantetheine adenylyltransferase OS=Saccharomyces cerevisiae (strain ATCC 204508 / S288c) GN=CAB4 PE=1 SV=1
P0C0W9	RPL11A (P0C0W9)	0.0334987	0.0116075	2.15467e+08	1.93671e+08	0.898844	60S ribosomal protein L11-A OS=Saccharomyces cerevisiae (strain ATCC 204508 / S288c) GN=RPL11A PE=1 SV=2
P40527	NEO1 (P40527)	0.702546	0.1505	238954	214739	0.898661	Probable phospholipid-transporting ATPase NEO1 OS=Saccharomyces cerevisiae (strain ATCC 204508 / S288c) GN=NEO1 PE=1 SV=1
P53145	LSG1 (P53145)	0.000742268	0.000447934	1.20919e+07	1.0863e+07	0.898375	Large subunit GTPase 1 OS=Saccharomyces cerevisiae (strain ATCC 204508 / S288c) GN=LSG1 PE=1 SV=1
P00931	TRP5 (P00931)	0.0355211	0.012174	4.09481e+07	3.67664e+07	0.897878	Tryptophan synthase OS=Saccharomyces cerevisiae (strain ATCC 204508 / S288c) GN=TRP5 PE=1 SV=1
P38777	FSH1 (P38777)	0.0111113	0.00453545	8.2788e+06	7.4333e+06	0.897873	Family of serine hydrolases 1 OS=Saccharomyces cerevisiae (strain ATCC 204508 / S288c) GN=FSH1 PE=1 SV=1
P22139	RPB10 (P22139)	0.0225465	0.00831355	9.716e+06	8.71848e+06	0.897332	DNA-directed RNA polymerases I, II, and III subunit RPABC5 OS=Saccharomyces cerevisiae (strain ATCC 204508 / S288c) GN=RPB10 PE=1 SV=2
P40022	YER034W (P40022)	0.697871	0.149738	179740	161250	0.897129	Uncharacterized protein YER034W OS=Saccharomyces cerevisiae (strain ATCC 204508 / S288c) GN=YER034W PE=1 SV=1
Q05123	ARP9 (Q05123)	0.719414	0.153377	3.15715e+06	2.83227e+06	0.897097	Actin-like protein ARP9 OS=Saccharomyces cerevisiae (strain ATCC 204508 / S288c) GN=ARP9 PE=1 SV=1
Q03529	SCS7 (Q03529)	0.713853	0.152483	3.59421e+06	3.22395e+06	0.896984	Ceramide very long chain fatty acid hydroxylase SCS7 OS=Saccharomyces cerevisiae (strain ATCC 204508 / S288c) GN=SCS7 PE=1 SV=1
P38063	PRS4 (P38063)	0.0983545	0.0289232	1.21596e+06	1.0907e+06	0.896981	Ribose-phosphate pyrophosphokinase 4 OS=Saccharomyces cerevisiae (strain ATCC 204508 / S288c) GN=PRS4 PE=1 SV=3
P02400	RPP2B (P02400)	0.122874	0.0351298	2.55144e+08	2.28759e+08	0.896588	60S acidic ribosomal protein P2-beta OS=Saccharomyces cerevisiae (strain ATCC 204508 / S288c) GN=RPP2B PE=1 SV=2
P34222	PTH2 (P34222)	0.123641	0.0352589	1.81389e+06	1.62631e+06	0.896586	Peptidyl-tRNA hydrolase 2 OS=Saccharomyces cerevisiae (strain ATCC 204508 / S288c) GN=PTH2 PE=1 SV=2
P32916	SRP101 (P32916)	0.0244152	0.00885793	2.43777e+06	2.18505e+06	0.896331	Signal recognition particle receptor subunit alpha homolog OS=Saccharomyces cerevisiae (strain ATCC 204508 / S288c) GN=SRP101 PE=1 SV=2
P53903	PGA2 (P53903)	0.00329684	0.00157883	2.88046e+06	2.57897e+06	0.895332	Processing of GAS1 and ALP protein 2 OS=Saccharomyces cerevisiae (strain ATCC 204508 / S288c) GN=PGA2 PE=1 SV=3
P35997	RPS27A (P35997)	0.00305848	0.00148595	1.53986e+08	1.3783e+08	0.895081	40S ribosomal protein S27-A OS=Saccharomyces cerevisiae (strain ATCC 204508 / S288c) GN=RPS27A PE=1 SV=1
P51601	FOL2 (P51601)	9.77191e-05	8.06106e-05	959688	858000	0.89404	GTP cyclohydrolase 1 OS=Saccharomyces cerevisiae (strain ATCC 204508 / S288c) GN=FOL2 PE=1 SV=1
P05755	RPS9B (P05755)	0.0118414	0.00480121	2.00738e+08	1.79388e+08	0.893644	40S ribosomal protein S9-B OS=Saccharomyces cerevisiae (strain ATCC 204508 / S288c) GN=RPS9B PE=1 SV=4
P38912	TIF11 (P38912)	0.0433321	0.0144012	1.24509e+07	1.11242e+07	0.893446	Eukaryotic translation initiation factor 1A OS=Saccharomyces cerevisiae (strain ATCC 204508 / S288c) GN=TIF11 PE=1 SV=1
P48567	PUS4 (P48567)	0.719233	0.153377	3.51665e+06	3.13848e+06	0.892463	tRNA pseudouridine synthase 4 OS=Saccharomyces cerevisiae (strain ATCC 204508 / S288c) GN=PUS4 PE=1 SV=1
P30656	PRE2 (P30656)	0.669389	0.145069	8.62939e+06	7.69887e+06	0.892169	Proteasome subunit beta type-5 OS=Saccharomyces cerevisiae (strain ATCC 204508 / S288c) GN=PRE2 PE=1 SV=3
P40517	YRB2 (P40517)	0.0534064	0.0172773	3.26845e+06	2.91533e+06	0.891959	Ran-specific GTPase-activating protein 2 OS=Saccharomyces cerevisiae (strain ATCC 204508 / S288c) GN=YRB2 PE=1 SV=1
P39960	BEM2 (P39960)	0.129851	0.0368509	2.15498e+06	1.92057e+06	0.891225	GTPase-activating protein BEM2/IPL2 OS=Saccharomyces cerevisiae (strain ATCC 204508 / S288c) GN=BEM2 PE=1 SV=1
P53040	TAF6 (P53040)	0.00614021	0.00269545	3.6165e+06	3.22142e+06	0.890756	Transcription initiation factor TFIID subunit 6 OS=Saccharomyces cerevisiae (strain ATCC 204508 / S288c) GN=TAF6 PE=1 SV=1
P12754	GCD2 (P12754)	0.0123341	0.00495893	3.24665e+06	2.89135e+06	0.890565	Translation initiation factor eIF-2B subunit delta OS=Saccharomyces cerevisiae (strain ATCC 204508 / S288c) GN=GCD2 PE=1 SV=1
P38061	RPL32 (P38061)	0.184051	0.0492725	1.51482e+08	1.34775e+08	0.889708	60S ribosomal protein L32 OS=Saccharomyces cerevisiae (strain ATCC 204508 / S288c) GN=RPL32 PE=1 SV=1
P53691	CPR6 (P53691)	0.147095	0.0409864	1.87018e+07	1.66246e+07	0.888932	Peptidyl-prolyl cis-trans isomerase CPR6 OS=Saccharomyces cerevisiae (strain ATCC 204508 / S288c) GN=CPR6 PE=1 SV=1
P0CX23		0.0199182	0.00748202	3.56693e+08	3.16902e+08	0.888446	60S ribosomal protein L20-A OS=Saccharomyces cerevisiae (strain ATCC 204508 / S288c) GN=RPL20A PE=1 SV=1
P38795	QNS1 (P38795)	0.0784772	0.0241203	5.18535e+06	4.60429e+06	0.887942	Glutamine-dependent NAD(+) synthetase OS=Saccharomyces cerevisiae (strain ATCC 204508 / S288c) GN=QNS1 PE=1 SV=1
P47103	CPR7 (P47103)	0.10276	0.0300864	1.03533e+06	918751	0.887398	Peptidyl-prolyl cis-trans isomerase CYP7 OS=Saccharomyces cerevisiae (strain ATCC 204508 / S288c) GN=CPR7 PE=1 SV=1
P39524	DRS2 (P39524)	0.221825	0.0575652	978154	867981	0.887366	Probable phospholipid-transporting ATPase DRS2 OS=Saccharomyces cerevisiae (strain ATCC 204508 / S288c) GN=DRS2 PE=1 SV=2
P07806	VAS1 (P07806)	5.39304e-05	4.88228e-05	4.13313e+07	3.66709e+07	0.887243	Valine--tRNA ligase, mitochondrial OS=Saccharomyces cerevisiae (strain ATCC 204508 / S288c) GN=VAS1 PE=1 SV=2
P41815	BAP3 (P41815)	0.758365	0.160708	977090	866701	0.887023	Valine amino-acid permease OS=Saccharomyces cerevisiae (strain ATCC 204508 / S288c) GN=BAP3 PE=1 SV=2
Q01855	RPS15 (Q01855)	0.00501211	0.00227487	2.23495e+08	1.98096e+08	0.886355	40S ribosomal protein S15 OS=Saccharomyces cerevisiae (strain ATCC 204508 / S288c) GN=RPS15 PE=1 SV=1
Q12272	TPT1 (Q12272)	0.187778	0.0501127	1.32359e+06	1.17281e+06	0.886083	tRNA 2'-phosphotransferase OS=Saccharomyces cerevisiae (strain ATCC 204508 / S288c) GN=TPT1 PE=1 SV=1
P39730	FUN12 (P39730)	0.00111903	0.000634445	2.43098e+07	2.15396e+07	0.886045	Eukaryotic translation initiation factor 5B OS=Saccharomyces cerevisiae (strain ATCC 204508 / S288c) GN=FUN12 PE=1 SV=2
P39081	PCF11 (P39081)	0.13127	0.0371337	193402	171322	0.885836	Protein PCF11 OS=Saccharomyces cerevisiae (strain ATCC 204508 / S288c) GN=PCF11 PE=1 SV=2
Q04121	NHX1 (Q04121)	0.229842	0.0593008	898677	795970	0.885712	Endosomal/prevacuolar sodium/hydrogen exchanger OS=Saccharomyces cerevisiae (strain ATCC 204508 / S288c) GN=NHX1 PE=1 SV=1
P56628	RPL22B (P56628)	0.161352	0.0441859	1.52625e+07	1.35178e+07	0.885688	60S ribosomal protein L22-B OS=Saccharomyces cerevisiae (strain ATCC 204508 / S288c) GN=RPL22B PE=1 SV=2
P32353	ERG3 (P32353)	0.0385315	0.0130258	4.91385e+06	4.35165e+06	0.885588	C-5 sterol desaturase OS=Saccharomyces cerevisiae (strain ATCC 204508 / S288c) GN=ERG3 PE=1 SV=1
Q08245	ZEO1 (Q08245)	0.283208	0.0707767	6.53763e+07	5.78795e+07	0.88533	Protein ZEO1 OS=Saccharomyces cerevisiae (strain ATCC 204508 / S288c) GN=ZEO1 PE=1 SV=3
P40484	MOB1 (P40484)	0.18918	0.0503834	1.20638e+06	1.06772e+06	0.885063	DBF2 kinase activator protein MOB1 OS=Saccharomyces cerevisiae (strain ATCC 204508 / S288c) GN=MOB1 PE=1 SV=2
P36160	RPF2 (P36160)	7.81855e-05	6.69743e-05	2.15394e+06	1.90625e+06	0.885008	Ribosome biogenesis protein RPF2 OS=Saccharomyces cerevisiae (strain ATCC 204508 / S288c) GN=RPF2 PE=1 SV=1
P38902	RPB11 (P38902)	0.0120888	0.00488085	1.58695e+06	1.40426e+06	0.884879	DNA-directed RNA polymerase II subunit RPB11 OS=Saccharomyces cerevisiae (strain ATCC 204508 / S288c) GN=RPB11 PE=1 SV=1
P54837	ERV25 (P54837)	0.082692	0.0251007	9.08299e+06	8.033e+06	0.884401	Endoplasmic reticulum vesicle protein 25 OS=Saccharomyces cerevisiae (strain ATCC 204508 / S288c) GN=ERV25 PE=1 SV=1
P04147	PAB1 (P04147)	0.00229912	0.00117326	9.56461e+07	8.45722e+07	0.88422	Polyadenylate-binding protein, cytoplasmic and nuclear OS=Saccharomyces cerevisiae (strain ATCC 204508 / S288c) GN=PAB1 PE=1 SV=4
P39969	BOI2 (P39969)	0.249314	0.0636375	193615	171098	0.883707	Protein BOI2 OS=Saccharomyces cerevisiae (strain ATCC 204508 / S288c) GN=BOI2 PE=1 SV=1
P06367	RPS14A (P06367)	0.01148	0.00467739	2.60644e+08	2.30239e+08	0.883347	40S ribosomal protein S14-A OS=Saccharomyces cerevisiae (strain ATCC 204508 / S288c) GN=RPS14A PE=1 SV=5
P07702	LYS2 (P07702)	0.0201407	0.00755711	6.92048e+06	6.11232e+06	0.883223	L-aminoadipate-semialdehyde dehydrogenase OS=Saccharomyces cerevisiae (strain ATCC 204508 / S288c) GN=LYS2 PE=1 SV=2
P53254	UTP22 (P53254)	0.00026693	0.000185826	4.92162e+06	4.34672e+06	0.883188	U3 small nucleolar RNA-associated protein 22 OS=Saccharomyces cerevisiae (strain ATCC 204508 / S288c) GN=UTP22 PE=1 SV=1
Q08225	YOL057W (Q08225)	0.0499686	0.0162991	5.05186e+06	4.45883e+06	0.882612	Probable dipeptidyl peptidase 3 OS=Saccharomyces cerevisiae (strain ATCC 204508 / S288c) GN=YOL057W PE=1 SV=1
P40567	MSL1 (P40567)	0.390737	0.093127	131123	115726	0.882576	U2 small nuclear ribonucleoprotein B'' OS=Saccharomyces cerevisiae (strain ATCC 204508 / S288c) GN=MSL1 PE=1 SV=1
P00958	MES1 (P00958)	0.159306	0.043751	2.07308e+07	1.82959e+07	0.882544	Methionine--tRNA ligase, cytoplasmic OS=Saccharomyces cerevisiae (strain ATCC 204508 / S288c) GN=MES1 PE=1 SV=4
P32505	NAB2 (P32505)	0.552039	0.123169	4.47477e+06	3.94758e+06	0.882186	Nuclear polyadenylated RNA-binding protein NAB2 OS=Saccharomyces cerevisiae (strain ATCC 204508 / S288c) GN=NAB2 PE=1 SV=1
P27810	KTR1 (P27810)	0.434679	0.10129	4.53256e+06	3.99816e+06	0.882097	Alpha-1,2 mannosyltransferase KTR1 OS=Saccharomyces cerevisiae (strain ATCC 204508 / S288c) GN=KTR1 PE=1 SV=1
P15705	STI1 (P15705)	0.395173	0.0938878	3.85638e+07	3.40111e+07	0.881944	Heat shock protein STI1 OS=Saccharomyces cerevisiae (strain ATCC 204508 / S288c) GN=STI1 PE=1 SV=1
P48363	PAC10 (P48363)	0.399227	0.0946303	3.9124e+06	3.45014e+06	0.88185	Prefoldin subunit 3 OS=Saccharomyces cerevisiae (strain ATCC 204508 / S288c) GN=PAC10 PE=1 SV=1
P48439	OST3 (P48439)	0.00859644	0.00361157	2.1858e+06	1.92724e+06	0.881709	Dolichyl-diphosphooligosaccharide--protein glycosyltransferase subunit 3 OS=Saccharomyces cerevisiae (strain ATCC 204508 / S288c) GN=OST3 PE=1 SV=1
P38174	MAP2 (P38174)	0.172083	0.0466663	4.90168e+06	4.31978e+06	0.881287	Methionine aminopeptidase 2 OS=Saccharomyces cerevisiae (strain ATCC 204508 / S288c) GN=MAP2 PE=1 SV=4
Q05979	BNA5 (Q05979)	0.00669076	0.00290097	1.55269e+06	1.36816e+06	0.881152	Kynureninase OS=Saccharomyces cerevisiae (strain ATCC 204508 / S288c) GN=BNA5 PE=1 SV=1
P20049	TYR1 (P20049)	0.000559216	0.000351288	381359	336024	0.881125	Prephenate dehydrogenase [NADP(+)] OS=Saccharomyces cerevisiae (strain ATCC 204508 / S288c) GN=TYR1 PE=1 SV=2
P04911	HTA1 (P04911)	0.21436	0.0559304	1.25289e+08	1.10336e+08	0.880655	Histone H2A.1 OS=Saccharomyces cerevisiae (strain ATCC 204508 / S288c) GN=HTA1 PE=1 SV=2
P36048	SNU114 (P36048)	0.343181	0.0831554	1.17325e+06	1.03319e+06	0.880622	Pre-mRNA-splicing factor SNU114 OS=Saccharomyces cerevisiae (strain ATCC 204508 / S288c) GN=SNU114 PE=1 SV=1
P12945	NAT1 (P12945)	0.068303	0.0214835	6.35113e+06	5.59113e+06	0.880336	N-terminal acetyltransferase A complex subunit NAT1 OS=Saccharomyces cerevisiae (strain ATCC 204508 / S288c) GN=NAT1 PE=1 SV=2
P48164	RPS7B (P48164)	0.00395529	0.00185303	1.11125e+08	9.78007e+07	0.880099	40S ribosomal protein S7-B OS=Saccharomyces cerevisiae (strain ATCC 204508 / S288c) GN=RPS7B PE=1 SV=1
P08004	CHS1 (P08004)	0.491056	0.112124	670738	590288	0.880058	Chitin synthase 1 OS=Saccharomyces cerevisiae (strain ATCC 204508 / S288c) GN=CHS1 PE=1 SV=2
P0C5R9	YPR170W-B (P0C5R9)	0.000168418	0.000126311	281712	247906	0.879998	Uncharacterized protein YPR170W-B OS=Saccharomyces cerevisiae (strain ATCC 204508 / S288c) GN=YPR170W-B PE=3 SV=1
Q12125	GET4 (Q12125)	0.0694443	0.0217098	3.51534e+06	3.09162e+06	0.879465	Golgi to ER traffic protein 4 OS=Saccharomyces cerevisiae (strain ATCC 204508 / S288c) GN=GET4 PE=1 SV=1
P38784	VMA22 (P38784)	0.516911	0.116752	2.05998e+06	1.80867e+06	0.878001	Vacuolar ATPase assembly protein VMA22 OS=Saccharomyces cerevisiae (strain ATCC 204508 / S288c) GN=VMA22 PE=1 SV=1
P53008	CWH41 (P53008)	0.926108	0.190405	3.45775e+06	3.03346e+06	0.877293	Mannosyl-oligosaccharide glucosidase OS=Saccharomyces cerevisiae (strain ATCC 204508 / S288c) GN=CWH41 PE=1 SV=1
P47076	RPC17 (P47076)	0.0178536	0.00681752	1.51798e+06	1.33139e+06	0.877082	DNA-directed RNA polymerase III subunit RPC9 OS=Saccharomyces cerevisiae (strain ATCC 204508 / S288c) GN=RPC17 PE=1 SV=2
P39986	SPF1 (P39986)	0.0744945	0.0230623	1.60101e+07	1.40407e+07	0.876991	Manganese-transporting ATPase 1 OS=Saccharomyces cerevisiae (strain ATCC 204508 / S288c) GN=SPF1 PE=1 SV=1
P18851	STE4 (P18851)	0.1533	0.042415	795882	697591	0.876501	Guanine nucleotide-binding protein subunit beta OS=Saccharomyces cerevisiae (strain ATCC 204508 / S288c) GN=STE4 PE=1 SV=2
P39077	CCT3 (P39077)	0.0117976	0.00479032	1.29919e+07	1.13802e+07	0.875942	T-complex protein 1 subunit gamma OS=Saccharomyces cerevisiae (strain ATCC 204508 / S288c) GN=CCT3 PE=1 SV=2
Q12206	WTM2 (Q12206)	0.600858	0.132536	157363	137779	0.875548	Transcriptional modulator WTM2 OS=Saccharomyces cerevisiae (strain ATCC 204508 / S288c) GN=WTM2 PE=1 SV=1
P53723	YNR021W (P53723)	0.342011	0.082962	9.70659e+06	8.4981e+06	0.875498	UPF0674 endoplasmic reticulum membrane protein YNR021W OS=Saccharomyces cerevisiae (strain ATCC 204508 / S288c) GN=YNR021W PE=1 SV=3
P53125	ITC1 (P53125)	0.816308	0.170929	121511	106231	0.874247	Imitation switch two complex protein 1 OS=Saccharomyces cerevisiae (strain ATCC 204508 / S288c) GN=ITC1 PE=1 SV=1
P16861	PFK1 (P16861)	0.00702775	0.00302162	8.74065e+07	7.63983e+07	0.874058	ATP-dependent 6-phosphofructokinase subunit alpha OS=Saccharomyces cerevisiae (strain ATCC 204508 / S288c) GN=PFK1 PE=1 SV=1
Q08954	YPL199C (Q08954)	0.18311	0.0490992	2.04523e+06	1.78728e+06	0.873878	Smr domain-containing protein YPL199C OS=Saccharomyces cerevisiae (strain ATCC 204508 / S288c) GN=YPL199C PE=1 SV=1
P20424	SRP54 (P20424)	0.137357	0.0386106	4.70618e+06	4.10402e+06	0.872048	Signal recognition particle subunit SRP54 OS=Saccharomyces cerevisiae (strain ATCC 204508 / S288c) GN=SRP54 PE=1 SV=2
P47120	LIA1 (P47120)	3.27296e-05	3.20319e-05	2.54916e+07	2.22298e+07	0.872044	Deoxyhypusine hydroxylase OS=Saccharomyces cerevisiae (strain ATCC 204508 / S288c) GN=LIA1 PE=1 SV=1
P10363	PRI1 (P10363)	0.39663	0.0940958	4.89361e+06	4.26694e+06	0.871941	DNA primase small subunit OS=Saccharomyces cerevisiae (strain ATCC 204508 / S288c) GN=PRI1 PE=1 SV=2
Q05022	RRP5 (Q05022)	1.81678e-05	1.99254e-05	1.61876e+07	1.41092e+07	0.871606	rRNA biogenesis protein RRP5 OS=Saccharomyces cerevisiae (strain ATCC 204508 / S288c) GN=RRP5 PE=1 SV=1
P31382	PMT2 (P31382)	0.477237	0.109642	8.57869e+06	7.47522e+06	0.87137	Dolichyl-phosphate-mannose--protein mannosyltransferase 2 OS=Saccharomyces cerevisiae (strain ATCC 204508 / S288c) GN=PMT2 PE=1 SV=2
P32582	CYS4 (P32582)	0.247433	0.0632297	6.83624e+07	5.95683e+07	0.87136	Cystathionine beta-synthase OS=Saccharomyces cerevisiae (strain ATCC 204508 / S288c) GN=CYS4 PE=1 SV=1
P40422	RPC10 (P40422)	0.00429432	0.00198682	1.25322e+07	1.09076e+07	0.87037	DNA-directed RNA polymerases I, II, and III subunit RPABC4 OS=Saccharomyces cerevisiae (strain ATCC 204508 / S288c) GN=RPC10 PE=1 SV=1
P26785	RPL16B (P26785)	0.00141012	0.000773267	1.13349e+08	9.86489e+07	0.87031	60S ribosomal protein L16-B OS=Saccharomyces cerevisiae (strain ATCC 204508 / S288c) GN=RPL16B PE=1 SV=3
P12709	PGI1 (P12709)	0.12064	0.0345947	2.11035e+08	1.8356e+08	0.869809	Glucose-6-phosphate isomerase OS=Saccharomyces cerevisiae (strain ATCC 204508 / S288c) GN=PGI1 PE=1 SV=3
P53114	NUT1 (P53114)	0.535007	0.120029	296316	257470	0.868903	Mediator of RNA polymerase II transcription subunit 5 OS=Saccharomyces cerevisiae (strain ATCC 204508 / S288c) GN=NUT1 PE=1 SV=1
P20449	DBP5 (P20449)	0.00829536	0.00349917	1.15623e+07	1.00358e+07	0.867972	ATP-dependent RNA helicase DBP5 OS=Saccharomyces cerevisiae (strain ATCC 204508 / S288c) GN=DBP5 PE=1 SV=2
P38197	YBL036C (P38197)	0.00474194	0.00216547	5.70418e+06	4.95052e+06	0.867877	UPF0001 protein YBL036C OS=Saccharomyces cerevisiae (strain ATCC 204508 / S288c) GN=YBL036C PE=1 SV=1
P32486	KRE6 (P32486)	0.0310658	0.010887	7.61772e+06	6.61078e+06	0.867816	Beta-glucan synthesis-associated protein KRE6 OS=Saccharomyces cerevisiae (strain ATCC 204508 / S288c) GN=KRE6 PE=1 SV=2
P43535	GCN20 (P43535)	0.0214165	0.00796878	1.07231e+07	9.30525e+06	0.867772	Protein GCN20 OS=Saccharomyces cerevisiae (strain ATCC 204508 / S288c) GN=GCN20 PE=1 SV=1
P41058	RPS29B (P41058)	0.0576726	0.0184876	3.25315e+07	2.82222e+07	0.867534	40S ribosomal protein S29-B OS=Saccharomyces cerevisiae (strain ATCC 204508 / S288c) GN=RPS29B PE=1 SV=3
P50861	RIB4 (P50861)	0.254409	0.0646911	1.75566e+07	1.52285e+07	0.867393	6,7-dimethyl-8-ribityllumazine synthase OS=Saccharomyces cerevisiae (strain ATCC 204508 / S288c) GN=RIB4 PE=1 SV=2
Q03835	GRX3 (Q03835)	0.0246263	0.00892	1.52454e+07	1.32235e+07	0.867381	Monothiol glutaredoxin-3 OS=Saccharomyces cerevisiae (strain ATCC 204508 / S288c) GN=GRX3 PE=1 SV=1
Q07527	TRM3 (Q07527)	0.00438101	0.00202134	999388	866629	0.867159	tRNA (guanosine(18)-2'-O)-methyltransferase OS=Saccharomyces cerevisiae (strain ATCC 204508 / S288c) GN=TRM3 PE=1 SV=1
P06786	TOP2 (P06786)	0.00219175	0.00112533	2.3444e+06	2.03257e+06	0.86699	DNA topoisomerase 2 OS=Saccharomyces cerevisiae (strain ATCC 204508 / S288c) GN=TOP2 PE=1 SV=2
P34163	TGL1 (P34163)	0.226806	0.058608	1.26468e+06	1.09523e+06	0.866019	Sterol esterase TGL1 OS=Saccharomyces cerevisiae (strain ATCC 204508 / S288c) GN=TGL1 PE=1 SV=1
P0CX27		0.281885	0.0704988	1.72824e+07	1.49618e+07	0.865726	60S ribosomal protein L42-A OS=Saccharomyces cerevisiae (strain ATCC 204508 / S288c) GN=RPL42A PE=1 SV=1
P17255	VMA1 (P17255)	0.0174238	0.00668006	5.69182e+07	4.92678e+07	0.865589	V-type proton ATPase catalytic subunit A OS=Saccharomyces cerevisiae (strain ATCC 204508 / S288c) GN=VMA1 PE=1 SV=3
P32767	KAP122 (P32767)	0.00624298	0.00272982	1.5057e+06	1.30301e+06	0.865382	Importin beta-like protein KAP122 OS=Saccharomyces cerevisiae (strain ATCC 204508 / S288c) GN=KAP122 PE=1 SV=1
P38698	PPX1 (P38698)	0.143812	0.0402054	2.0119e+06	1.74088e+06	0.865293	Exopolyphosphatase OS=Saccharomyces cerevisiae (strain ATCC 204508 / S288c) GN=PPX1 PE=1 SV=1
P40457	MLP2 (P40457)	0.450949	0.104427	358346	310043	0.865206	Protein MLP2 OS=Saccharomyces cerevisiae (strain ATCC 204508 / S288c) GN=MLP2 PE=1 SV=1
P53743	ESF2 (P53743)	0.0167559	0.00646103	686736	593722	0.864556	Pre-rRNA-processing protein ESF2 OS=Saccharomyces cerevisiae (strain ATCC 204508 / S288c) GN=ESF2 PE=1 SV=1
P32337	PSE1 (P32337)	6.36209e-05	5.65998e-05	6.18581e+06	5.3478e+06	0.864527	Importin subunit beta-3 OS=Saccharomyces cerevisiae (strain ATCC 204508 / S288c) GN=PSE1 PE=1 SV=2
P38219	OLA1 (P38219)	4.77046e-05	4.36592e-05	5.49186e+07	4.74754e+07	0.864469	Obg-like ATPase 1 OS=Saccharomyces cerevisiae (strain ATCC 204508 / S288c) GN=OLA1 PE=1 SV=1
P20486	CKS1 (P20486)	0.0227268	0.0083633	1.57989e+06	1.36564e+06	0.86439	Cyclin-dependent kinases regulatory subunit OS=Saccharomyces cerevisiae (strain ATCC 204508 / S288c) GN=CKS1 PE=1 SV=1
P53920	NMA111 (P53920)	0.00452165	0.00208049	3.75781e+06	3.24738e+06	0.864169	Pro-apoptotic serine protease NMA111 OS=Saccharomyces cerevisiae (strain ATCC 204508 / S288c) GN=NMA111 PE=1 SV=1
P47035	NET1 (P47035)	0.123597	0.0352589	2.8206e+06	2.43741e+06	0.864145	Nucleolar protein NET1 OS=Saccharomyces cerevisiae (strain ATCC 204508 / S288c) GN=NET1 PE=1 SV=1
P38011	ASC1 (P38011)	0.00119239	0.000667787	5.58738e+08	4.82757e+08	0.864013	Guanine nucleotide-binding protein subunit beta-like protein OS=Saccharomyces cerevisiae (strain ATCC 204508 / S288c) GN=ASC1 PE=1 SV=4
P53137	CUE3 (P53137)	0.476836	0.109587	930207	803482	0.863767	CUE domain-containing protein 3 OS=Saccharomyces cerevisiae (strain ATCC 204508 / S288c) GN=CUE3 PE=1 SV=1
P10622	RPP1B (P10622)	0.000556236	0.000349744	1.48761e+08	1.28467e+08	0.863578	60S acidic ribosomal protein P1-beta OS=Saccharomyces cerevisiae (strain ATCC 204508 / S288c) GN=RPP1B PE=1 SV=3
P38144	ISW1 (P38144)	0.000764061	0.000458444	2.90369e+06	2.50674e+06	0.863295	ISWI chromatin-remodeling complex ATPase ISW1 OS=Saccharomyces cerevisiae (strain ATCC 204508 / S288c) GN=ISW1 PE=1 SV=2
P46989	ATG27 (P46989)	0.0440682	0.0146058	1.78258e+06	1.53811e+06	0.862854	Autophagy-related protein 27 OS=Saccharomyces cerevisiae (strain ATCC 204508 / S288c) GN=ATG27 PE=1 SV=2
P48524	BUL1 (P48524)	0.0601849	0.0191735	652871	563053	0.862427	Ubiquitin ligase-binding protein BUL1 OS=Saccharomyces cerevisiae (strain ATCC 204508 / S288c) GN=BUL1 PE=1 SV=1
P05750	RPS3 (P05750)	3.9687e-05	3.75015e-05	4.5676e+08	3.93741e+08	0.862029	40S ribosomal protein S3 OS=Saccharomyces cerevisiae (strain ATCC 204508 / S288c) GN=RPS3 PE=1 SV=5
P25339	PUF4 (P25339)	0.124927	0.0355953	2.6306e+06	2.26565e+06	0.861268	Pumilio homology domain family member 4 OS=Saccharomyces cerevisiae (strain ATCC 204508 / S288c) GN=PUF4 PE=1 SV=2
P32783	ABD1 (P32783)	0.237635	0.061097	453802	390813	0.861197	mRNA cap guanine-N7 methyltransferase OS=Saccharomyces cerevisiae (strain ATCC 204508 / S288c) GN=ABD1 PE=1 SV=1
Q05506	YDR341C (Q05506)	0.000135743	0.000105352	2.03948e+07	1.75507e+07	0.860547	Arginine--tRNA ligase, cytoplasmic OS=Saccharomyces cerevisiae (strain ATCC 204508 / S288c) GN=YDR341C PE=1 SV=1
P40481	HPM1 (P40481)	0.214184	0.0559076	752241	647223	0.860393	Histidine protein methyltransferase 1 OS=Saccharomyces cerevisiae (strain ATCC 204508 / S288c) GN=HPM1 PE=1 SV=1
P47029	ALY2 (P47029)	0.0690047	0.0216128	329607	283586	0.860377	Arrestin-related trafficking adapter 3 OS=Saccharomyces cerevisiae (strain ATCC 204508 / S288c) GN=ALY2 PE=1 SV=2
P54730	UBX4 (P54730)	0.387813	0.092562	239611	205882	0.859232	UBX domain-containing protein 4 OS=Saccharomyces cerevisiae (strain ATCC 204508 / S288c) GN=UBX4 PE=1 SV=1
P14120	RPL30 (P14120)	0.00481501	0.00219434	4.31861e+08	3.70667e+08	0.858302	60S ribosomal protein L30 OS=Saccharomyces cerevisiae (strain ATCC 204508 / S288c) GN=RPL30 PE=1 SV=3
P02406	RPL28 (P02406)	0.00221106	0.00113351	1.56611e+08	1.34414e+08	0.858269	60S ribosomal protein L28 OS=Saccharomyces cerevisiae (strain ATCC 204508 / S288c) GN=RPL28 PE=1 SV=3
P26321	RPL5 (P26321)	7.62378e-05	6.56421e-05	5.54667e+08	4.75982e+08	0.858139	60S ribosomal protein L5 OS=Saccharomyces cerevisiae (strain ATCC 204508 / S288c) GN=RPL5 PE=1 SV=4
P38620	PRS2 (P38620)	0.0299081	0.0105365	1.67534e+06	1.43639e+06	0.857372	Ribose-phosphate pyrophosphokinase 2 OS=Saccharomyces cerevisiae (strain ATCC 204508 / S288c) GN=PRS2 PE=1 SV=1
Q12504	RKM4 (Q12504)	0.43954	0.102139	301651	258536	0.857069	Ribosomal lysine N-methyltransferase 4 OS=Saccharomyces cerevisiae (strain ATCC 204508 / S288c) GN=RKM4 PE=1 SV=1
P32349	RPC82 (P32349)	0.000352552	0.000236098	2.7453e+06	2.35265e+06	0.856972	DNA-directed RNA polymerase III subunit RPC3 OS=Saccharomyces cerevisiae (strain ATCC 204508 / S288c) GN=RPC82 PE=1 SV=2
P32610	VMA8 (P32610)	0.0896787	0.02676	1.73215e+07	1.48356e+07	0.856486	V-type proton ATPase subunit D OS=Saccharomyces cerevisiae (strain ATCC 204508 / S288c) GN=VMA8 PE=1 SV=1
P25298	RNA14 (P25298)	0.0409704	0.0137392	840723	720041	0.856455	mRNA 3'-end-processing protein RNA14 OS=Saccharomyces cerevisiae (strain ATCC 204508 / S288c) GN=RNA14 PE=1 SV=2
Q12514	NOT5 (Q12514)	0.0677317	0.0213339	2.93609e+06	2.51253e+06	0.855741	General negative regulator of transcription subunit 5 OS=Saccharomyces cerevisiae (strain ATCC 204508 / S288c) GN=NOT5 PE=1 SV=1
P35202	THI80 (P35202)	0.197181	0.0520586	647026	553661	0.855701	Thiamine pyrophosphokinase OS=Saccharomyces cerevisiae (strain ATCC 204508 / S288c) GN=THI80 PE=1 SV=1
P06169	PDC1 (P06169)	0.00079775	0.000476947	2.05046e+09	1.75304e+09	0.854951	Pyruvate decarboxylase isozyme 1 OS=Saccharomyces cerevisiae (strain ATCC 204508 / S288c) GN=PDC1 PE=1 SV=7
P07347	ARD1 (P07347)	0.149542	0.0414954	4.4698e+06	3.82101e+06	0.85485	N-terminal acetyltransferase A complex catalytic subunit ARD1 OS=Saccharomyces cerevisiae (strain ATCC 204508 / S288c) GN=ARD1 PE=1 SV=2
P40093	YER156C (P40093)	0.000408164	0.000266406	8.8531e+06	7.56474e+06	0.854474	UPF0160 protein YER156C OS=Saccharomyces cerevisiae (strain ATCC 204508 / S288c) GN=YER156C PE=1 SV=1
P17629	HPR1 (P17629)	0.194453	0.051501	369461	315673	0.854415	THO complex subunit HPR1 OS=Saccharomyces cerevisiae (strain ATCC 204508 / S288c) GN=HPR1 PE=1 SV=2
Q04213	IOC4 (Q04213)	0.0328406	0.0114371	435119	371705	0.854262	ISWI one complex protein 4 OS=Saccharomyces cerevisiae (strain ATCC 204508 / S288c) GN=IOC4 PE=1 SV=1
P40525	RPL34B (P40525)	0.0529359	0.01715	1.06355e+08	9.08293e+07	0.854023	60S ribosomal protein L34-B OS=Saccharomyces cerevisiae (strain ATCC 204508 / S288c) GN=RPL34B PE=1 SV=1
P38986	ASP1 (P38986)	0.112537	0.0326349	1.54116e+07	1.3156e+07	0.853642	L-asparaginase 1 OS=Saccharomyces cerevisiae (strain ATCC 204508 / S288c) GN=ASP1 PE=1 SV=1
P54781	ERG5 (P54781)	0.00252211	0.00127061	4.2821e+06	3.65525e+06	0.853611	Cytochrome P450 61 OS=Saccharomyces cerevisiae (strain ATCC 204508 / S288c) GN=ERG5 PE=1 SV=1
P17423	THR1 (P17423)	0.00159917	0.000862096	3.26717e+07	2.78781e+07	0.853279	Homoserine kinase OS=Saccharomyces cerevisiae (strain ATCC 204508 / S288c) GN=THR1 PE=1 SV=4
P41057	RPS29A (P41057)	0.000164277	0.000123625	3.45617e+07	2.94786e+07	0.852928	40S ribosomal protein S29-A OS=Saccharomyces cerevisiae (strain ATCC 204508 / S288c) GN=RPS29A PE=1 SV=3
P38146	YPT10 (P38146)	0.152883	0.0423346	473709	403967	0.852775	GTP-binding protein YPT10 OS=Saccharomyces cerevisiae (strain ATCC 204508 / S288c) GN=YPT10 PE=1 SV=2
P16140	VMA2 (P16140)	0.00112632	0.000637496	6.93326e+07	5.91151e+07	0.85263	V-type proton ATPase subunit B OS=Saccharomyces cerevisiae (strain ATCC 204508 / S288c) GN=VMA2 PE=1 SV=2
P38850	RTT107 (P38850)	0.264384	0.0669985	384728	327713	0.851805	Regulator of Ty1 transposition protein 107 OS=Saccharomyces cerevisiae (strain ATCC 204508 / S288c) GN=RTT107 PE=1 SV=1
Q08967	FLC1 (Q08967)	0.754401	0.160071	257862	219578	0.851531	Flavin carrier protein 1 OS=Saccharomyces cerevisiae (strain ATCC 204508 / S288c) GN=FLC1 PE=1 SV=1
P42838	LEM3 (P42838)	0.338913	0.0824498	783624	667031	0.851213	Alkylphosphocholine resistance protein LEM3 OS=Saccharomyces cerevisiae (strain ATCC 204508 / S288c) GN=LEM3 PE=1 SV=1
P25574	EMC1 (P25574)	0.083531	0.025275	3.25366e+06	2.76948e+06	0.851188	ER membrane protein complex subunit 1 OS=Saccharomyces cerevisiae (strain ATCC 204508 / S288c) GN=EMC1 PE=1 SV=1
P32324		0.00106517	0.000610612	5.856e+08	4.98449e+08	0.851177	Elongation factor 2 OS=Saccharomyces cerevisiae (strain ATCC 204508 / S288c) GN=EFT1 PE=1 SV=1
P39001	UME6 (P39001)	0.0889983	0.0266045	453776	385887	0.85039	Transcriptional regulatory protein UME6 OS=Saccharomyces cerevisiae (strain ATCC 204508 / S288c) GN=UME6 PE=1 SV=2
P00815	HIS4 (P00815)	0.00146797	0.000799096	2.9011e+07	2.46616e+07	0.850076	Histidine biosynthesis trifunctional protein OS=Saccharomyces cerevisiae (strain ATCC 204508 / S288c) GN=HIS4 PE=1 SV=3
P0CX29		0.0214899	0.00799167	1.51064e+08	1.28395e+08	0.849935	40S ribosomal protein S23-A OS=Saccharomyces cerevisiae (strain ATCC 204508 / S288c) GN=RPS23A PE=1 SV=1
P36421	TYS1 (P36421)	0.014004	0.00553386	2.04178e+07	1.73383e+07	0.849177	Tyrosine--tRNA ligase, cytoplasmic OS=Saccharomyces cerevisiae (strain ATCC 204508 / S288c) GN=TYS1 PE=1 SV=3
P05745	RPL36A (P05745)	0.0158493	0.0061581	2.53768e+07	2.15265e+07	0.848274	60S ribosomal protein L36-A OS=Saccharomyces cerevisiae (strain ATCC 204508 / S288c) GN=RPL36A PE=1 SV=3
O14455	RPL36B (O14455)	0.0158493	0.0061581	1.11806e+08	9.48424e+07	0.848274	60S ribosomal protein L36-B OS=Saccharomyces cerevisiae (strain ATCC 204508 / S288c) GN=RPL36B PE=1 SV=3
Q04322	GYL1 (Q04322)	0.998764	0.202174	431354	365814	0.84806	Probable GTPase-activating protein GYL1 OS=Saccharomyces cerevisiae (strain ATCC 204508 / S288c) GN=GYL1 PE=1 SV=1
P25299	RNA15 (P25299)	0.0634346	0.0201035	1.09872e+06	931757	0.848036	mRNA 3'-end-processing protein RNA15 OS=Saccharomyces cerevisiae (strain ATCC 204508 / S288c) GN=RNA15 PE=1 SV=1
P38013	AHP1 (P38013)	1.8676e-05	2.02832e-05	3.85141e+08	3.26585e+08	0.847963	Peroxiredoxin type-2 OS=Saccharomyces cerevisiae (strain ATCC 204508 / S288c) GN=AHP1 PE=1 SV=4
P21825	SEC62 (P21825)	0.0753247	0.0232655	664354	562904	0.847296	Translocation protein SEC62 OS=Saccharomyces cerevisiae (strain ATCC 204508 / S288c) GN=SEC62 PE=1 SV=2
P54070	KTR6 (P54070)	0.0246052	0.0089172	640256	542486	0.847296	Mannosyltransferase KTR6 OS=Saccharomyces cerevisiae (strain ATCC 204508 / S288c) GN=KTR6 PE=1 SV=1
P53860	PDR16 (P53860)	0.000162665	0.000122827	1.99641e+06	1.6914e+06	0.84722	Phosphatidylinositol transfer protein PDR16 OS=Saccharomyces cerevisiae (strain ATCC 204508 / S288c) GN=PDR16 PE=1 SV=1
P37303	GLY1 (P37303)	0.00237522	0.00120748	3.35692e+07	2.84214e+07	0.846649	Low specificity L-threonine aldolase OS=Saccharomyces cerevisiae (strain ATCC 204508 / S288c) GN=GLY1 PE=1 SV=2
P21965	MCK1 (P21965)	0.0648458	0.0205317	2.61014e+06	2.20675e+06	0.845452	Protein kinase MCK1 OS=Saccharomyces cerevisiae (strain ATCC 204508 / S288c) GN=MCK1 PE=1 SV=1
Q00684	CDC14 (Q00684)	0.0717418	0.022303	1.32109e+06	1.11657e+06	0.845187	Tyrosine-protein phosphatase CDC14 OS=Saccharomyces cerevisiae (strain ATCC 204508 / S288c) GN=CDC14 PE=1 SV=2
P43583	BLM10 (P43583)	0.0804032	0.0245619	706174	596759	0.84506	Proteasome activator BLM10 OS=Saccharomyces cerevisiae (strain ATCC 204508 / S288c) GN=BLM10 PE=1 SV=2
P00942	TPI1 (P00942)	0.00104978	0.000603364	4.57591e+08	3.86417e+08	0.84446	Triosephosphate isomerase OS=Saccharomyces cerevisiae (strain ATCC 204508 / S288c) GN=TPI1 PE=1 SV=2
P36135	UTH1 (P36135)	4.52056e-06	6.2448e-06	2.13293e+06	1.80059e+06	0.844185	Probable secreted beta-glucosidase UTH1 OS=Saccharomyces cerevisiae (strain ATCC 204508 / S288c) GN=UTH1 PE=1 SV=2
P50108	MNN10 (P50108)	0.00060753	0.000377736	747336	630545	0.843723	Probable alpha-1,6-mannosyltransferase MNN10 OS=Saccharomyces cerevisiae (strain ATCC 204508 / S288c) GN=MNN10 PE=1 SV=1
P25627	BUD23 (P25627)	0.000209288	0.000151368	465915	393068	0.843648	18S rRNA (guanine(1575)-N(7))-methyltransferase OS=Saccharomyces cerevisiae (strain ATCC 204508 / S288c) GN=BUD23 PE=1 SV=1
Q12263	GIN4 (Q12263)	0.064878	0.0205317	899886	759022	0.843465	Serine/threonine-protein kinase GIN4 OS=Saccharomyces cerevisiae (strain ATCC 204508 / S288c) GN=GIN4 PE=1 SV=1
P20448	HCA4 (P20448)	0.0122869	0.00494591	4.35321e+06	3.67167e+06	0.843439	ATP-dependent RNA helicase HCA4 OS=Saccharomyces cerevisiae (strain ATCC 204508 / S288c) GN=HCA4 PE=1 SV=2
P53852	YNL247W (P53852)	0.0232949	0.00853948	9.77772e+06	8.24557e+06	0.843301	Cysteine--tRNA ligase OS=Saccharomyces cerevisiae (strain ATCC 204508 / S288c) GN=YNL247W PE=1 SV=1
Q06053	DUS3 (Q06053)	0.0944278	0.0279515	1.95833e+06	1.64988e+06	0.842491	tRNA-dihydrouridine(47) synthase [NAD(P)(+)] OS=Saccharomyces cerevisiae (strain ATCC 204508 / S288c) GN=DUS3 PE=1 SV=2
P32639	BRR2 (P32639)	0.622875	0.136313	220000	185303	0.842284	Pre-mRNA-splicing helicase BRR2 OS=Saccharomyces cerevisiae (strain ATCC 204508 / S288c) GN=BRR2 PE=1 SV=2
Q12176	MAK21 (Q12176)	0.13498	0.0380384	5.11903e+06	4.30969e+06	0.841895	Ribosome biogenesis protein MAK21 OS=Saccharomyces cerevisiae (strain ATCC 204508 / S288c) GN=MAK21 PE=1 SV=1
Q06287	EMG1 (Q06287)	4.15167e-05	3.901e-05	5.28917e+06	4.4521e+06	0.841738	Ribosomal RNA small subunit methyltransferase NEP1 OS=Saccharomyces cerevisiae (strain ATCC 204508 / S288c) GN=EMG1 PE=1 SV=1
P32500	NDC1 (P32500)	0.00751612	0.00320278	665288	559872	0.841548	Nucleoporin NDC1 OS=Saccharomyces cerevisiae (strain ATCC 204508 / S288c) GN=NDC1 PE=1 SV=1
P08539	GPA1 (P08539)	0.00070465	0.000428989	933081	785018	0.841317	Guanine nucleotide-binding protein alpha-1 subunit OS=Saccharomyces cerevisiae (strain ATCC 204508 / S288c) GN=GPA1 PE=1 SV=3
P27809	KRE2 (P27809)	0.00437247	0.00201879	1.3155e+07	1.10646e+07	0.841094	Glycolipid 2-alpha-mannosyltransferase OS=Saccharomyces cerevisiae (strain ATCC 204508 / S288c) GN=KRE2 PE=1 SV=1
Q05636	RRP45 (Q05636)	0.0367621	0.0125225	953165	801595	0.840983	Exosome complex component RRP45 OS=Saccharomyces cerevisiae (strain ATCC 204508 / S288c) GN=RRP45 PE=1 SV=1
P35206	CSG2 (P35206)	0.0195244	0.00734649	2.28784e+06	1.92245e+06	0.84029	Mannosyl phosphorylinositol ceramide synthase regulatory protein CSG2 OS=Saccharomyces cerevisiae (strain ATCC 204508 / S288c) GN=CSG2 PE=1 SV=2
P27514	PHO91 (P27514)	0.00606698	0.00267207	1.76042e+06	1.47844e+06	0.839823	Low-affinity phosphate transporter PHO91 OS=Saccharomyces cerevisiae (strain ATCC 204508 / S288c) GN=PHO91 PE=1 SV=2
P32905	RPS0A (P32905)	0.0011161	0.000633319	5.77719e+08	4.85162e+08	0.839789	40S ribosomal protein S0-A OS=Saccharomyces cerevisiae (strain ATCC 204508 / S288c) GN=RPS0A PE=1 SV=3
Q12532	TAE2 (Q12532)	0.00842646	0.00354776	1.91302e+06	1.60625e+06	0.839639	Translation-associated element 2 OS=Saccharomyces cerevisiae (strain ATCC 204508 / S288c) GN=TAE2 PE=1 SV=1
P12684	HMG2 (P12684)	0.083904	0.0253535	1.16868e+06	980882	0.839309	3-hydroxy-3-methylglutaryl-coenzyme A reductase 2 OS=Saccharomyces cerevisiae (strain ATCC 204508 / S288c) GN=HMG2 PE=1 SV=1
P40959	MVP1 (P40959)	0.635249	0.138659	409539	343691	0.839214	Sorting nexin MVP1 OS=Saccharomyces cerevisiae (strain ATCC 204508 / S288c) GN=MVP1 PE=1 SV=2
Q04175	SXM1 (Q04175)	0.000391204	0.000257345	4.12406e+06	3.46059e+06	0.839121	Importin beta SMX1 OS=Saccharomyces cerevisiae (strain ATCC 204508 / S288c) GN=SXM1 PE=1 SV=1
P13382	POL1 (P13382)	0.0625827	0.0198617	865316	726050	0.839057	DNA polymerase alpha catalytic subunit A OS=Saccharomyces cerevisiae (strain ATCC 204508 / S288c) GN=POL1 PE=1 SV=2
P0CX33		0.000452986	0.00029224	3.71059e+07	3.11337e+07	0.83905	40S ribosomal protein S30-A OS=Saccharomyces cerevisiae (strain ATCC 204508 / S288c) GN=RPS30A PE=1 SV=1
P04449	RPL24A (P04449)	0.0032225	0.00154924	3.98595e+07	3.34318e+07	0.838741	60S ribosomal protein L24-A OS=Saccharomyces cerevisiae (strain ATCC 204508 / S288c) GN=RPL24A PE=1 SV=1
P48362	HGH1 (P48362)	0.00839345	0.00353609	4.12004e+06	3.45538e+06	0.838677	Protein HGH1 OS=Saccharomyces cerevisiae (strain ATCC 204508 / S288c) GN=HGH1 PE=1 SV=2
P36068	SHE2 (P36068)	0.389653	0.092965	612650	513686	0.838466	SWI5-dependent HO expression protein 2 OS=Saccharomyces cerevisiae (strain ATCC 204508 / S288c) GN=SHE2 PE=1 SV=1
sp|GAG_SCVLA|		3.55271e-15	1.70833e-12	3.86933e+06	3.24392e+06	0.838366	sp|GAG_SCVLA|
P11792	SCH9 (P11792)	0.0115072	0.00468559	1.57285e+06	1.31832e+06	0.838175	Serine/threonine-protein kinase SCH9 OS=Saccharomyces cerevisiae (strain ATCC 204508 / S288c) GN=SCH9 PE=1 SV=3
P34226	SKT5 (P34226)	0.0238579	0.0086982	214653	179797	0.837616	Protein SKT5 OS=Saccharomyces cerevisiae (strain ATCC 204508 / S288c) GN=SKT5 PE=1 SV=1
P0CX37		0.0034748	0.0016534	3.67149e+08	3.07455e+08	0.837412	40S ribosomal protein S6-A OS=Saccharomyces cerevisiae (strain ATCC 204508 / S288c) GN=RPS6A PE=1 SV=1
P53741	BRE5 (P53741)	0.0225038	0.00830867	3.19567e+06	2.6746e+06	0.836947	UBP3-associated protein BRE5 OS=Saccharomyces cerevisiae (strain ATCC 204508 / S288c) GN=BRE5 PE=1 SV=1
P25441	RPC53 (P25441)	0.044599	0.014749	2.4941e+06	2.08661e+06	0.836617	DNA-directed RNA polymerase III subunit RPC4 OS=Saccharomyces cerevisiae (strain ATCC 204508 / S288c) GN=RPC53 PE=1 SV=2
P38143	GPX2 (P38143)	0.00295797	0.00144446	6.06342e+06	5.06976e+06	0.836123	Glutathione peroxidase 2 OS=Saccharomyces cerevisiae (strain ATCC 204508 / S288c) GN=GPX2 PE=1 SV=1
P15624	FRS1 (P15624)	0.0292602	0.0103573	2.91915e+07	2.44016e+07	0.835916	Phenylalanine--tRNA ligase beta subunit OS=Saccharomyces cerevisiae (strain ATCC 204508 / S288c) GN=FRS1 PE=1 SV=3
P40319	SUR4 (P40319)	0.0121806	0.00491017	6.2083e+06	5.18342e+06	0.834917	Elongation of fatty acids protein 3 OS=Saccharomyces cerevisiae (strain ATCC 204508 / S288c) GN=ELO3 PE=1 SV=1
P19881	PHO13 (P19881)	0.317444	0.0779924	4.62055e+06	3.85586e+06	0.834503	4-nitrophenylphosphatase OS=Saccharomyces cerevisiae (strain ATCC 204508 / S288c) GN=PHO13 PE=1 SV=2
Q07623	NOP6 (Q07623)	7.1411e-06	8.99712e-06	3.54088e+06	2.95341e+06	0.834089	Nucleolar protein 6 OS=Saccharomyces cerevisiae (strain ATCC 204508 / S288c) GN=NOP6 PE=1 SV=1
P09436	ILS1 (P09436)	0.000309871	0.000211107	5.40227e+07	4.50493e+07	0.833896	Isoleucine--tRNA ligase, cytoplasmic OS=Saccharomyces cerevisiae (strain ATCC 204508 / S288c) GN=ILS1 PE=1 SV=1
P32835	GSP1 (P32835)	0.0105774	0.00434973	8.20965e+07	6.84579e+07	0.833871	GTP-binding nuclear protein GSP1/CNR1 OS=Saccharomyces cerevisiae (strain ATCC 204508 / S288c) GN=GSP1 PE=1 SV=1
P38786	RPP1 (P38786)	0.00433864	0.00200456	209756	174900	0.833826	Ribonuclease P/MRP protein subunit RPP1 OS=Saccharomyces cerevisiae (strain ATCC 204508 / S288c) GN=RPP1 PE=1 SV=1
P40533	TED1 (P40533)	0.0613343	0.0195025	2.72031e+06	2.26823e+06	0.833814	Protein TED1 OS=Saccharomyces cerevisiae (strain ATCC 204508 / S288c) GN=TED1 PE=1 SV=1
Q12189	RKI1 (Q12189)	0.000341552	0.00022942	4.03643e+06	3.36432e+06	0.83349	Ribose-5-phosphate isomerase OS=Saccharomyces cerevisiae (strain ATCC 204508 / S288c) GN=RKI1 PE=1 SV=1
Q02326	RPL6A (Q02326)	0.000921616	0.000540378	9.00085e+07	7.5017e+07	0.833443	60S ribosomal protein L6-A OS=Saccharomyces cerevisiae (strain ATCC 204508 / S288c) GN=RPL6A PE=1 SV=2
P53859	CSL4 (P53859)	4.63102e-05	4.30904e-05	3.05378e+06	2.54459e+06	0.833258	Exosome complex component CSL4 OS=Saccharomyces cerevisiae (strain ATCC 204508 / S288c) GN=CSL4 PE=1 SV=1
Q08299	ENB1 (Q08299)	0.820499	0.171646	38703.2	32231.4	0.832784	Siderophore iron transporter ENB1 OS=Saccharomyces cerevisiae (strain ATCC 204508 / S288c) GN=ENB1 PE=1 SV=1
Q06217	SMD2 (Q06217)	0.0425987	0.014214	866222	720923	0.83226	Small nuclear ribonucleoprotein Sm D2 OS=Saccharomyces cerevisiae (strain ATCC 204508 / S288c) GN=SMD2 PE=1 SV=2
P26793	RAD27 (P26793)	0.0790391	0.0242337	753734	627231	0.832164	Flap endonuclease 1 OS=Saccharomyces cerevisiae (strain ATCC 204508 / S288c) GN=RAD27 PE=1 SV=1
P04456	RPL25 (P04456)	0.00626973	0.00273973	2.40172e+08	1.99783e+08	0.831832	60S ribosomal protein L25 OS=Saccharomyces cerevisiae (strain ATCC 204508 / S288c) GN=RPL25 PE=1 SV=4
P25555	GBP2 (P25555)	0.00190241	0.000997946	3.96804e+06	3.30009e+06	0.831667	Single-strand telomeric DNA-binding protein GBP2 OS=Saccharomyces cerevisiae (strain ATCC 204508 / S288c) GN=GBP2 PE=1 SV=1
Q12000	TMA46 (Q12000)	0.0254221	0.00916572	3.49847e+06	2.90726e+06	0.831009	Translation machinery-associated protein 46 OS=Saccharomyces cerevisiae (strain ATCC 204508 / S288c) GN=TMA46 PE=1 SV=2
Q08645	MET7 (Q08645)	0.0181926	0.00693506	790778	656996	0.830823	Folylpolyglutamate synthase OS=Saccharomyces cerevisiae (strain ATCC 204508 / S288c) GN=MET7 PE=1 SV=1
P14906	SEC63 (P14906)	0.0121654	0.00490878	8.36525e+06	6.94498e+06	0.830218	Protein translocation protein SEC63 OS=Saccharomyces cerevisiae (strain ATCC 204508 / S288c) GN=SEC63 PE=1 SV=2
P42941	SER2 (P42941)	0.000846524	0.000502069	2.60979e+06	2.16627e+06	0.830057	Phosphoserine phosphatase OS=Saccharomyces cerevisiae (strain ATCC 204508 / S288c) GN=SER2 PE=1 SV=1
P46673	NUP85 (P46673)	0.192549	0.051118	1.24096e+06	1.0297e+06	0.829756	Nucleoporin NUP85 OS=Saccharomyces cerevisiae (strain ATCC 204508 / S288c) GN=NUP85 PE=1 SV=1
P32802	EMP70 (P32802)	1.5659e-05	1.74517e-05	3.42406e+06	2.84049e+06	0.829568	Transmembrane 9 superfamily member 1 OS=Saccharomyces cerevisiae (strain ATCC 204508 / S288c) GN=EMP70 PE=1 SV=2
P32917	STE5 (P32917)	0.0577468	0.0185025	222543	184539	0.829229	Protein STE5 OS=Saccharomyces cerevisiae (strain ATCC 204508 / S288c) GN=STE5 PE=1 SV=2
P10614	ERG11 (P10614)	0.000571639	0.000357749	1.88498e+07	1.55993e+07	0.827557	Lanosterol 14-alpha demethylase OS=Saccharomyces cerevisiae (strain ATCC 204508 / S288c) GN=ERG11 PE=1 SV=1
P38747	OTU2 (P38747)	8.19599e-06	1.0098e-05	1.32674e+06	1.09768e+06	0.82735	OTU domain-containing protein 2 OS=Saccharomyces cerevisiae (strain ATCC 204508 / S288c) GN=OTU2 PE=1 SV=1
Q02457	TBF1 (Q02457)	0.0852529	0.0256568	2.38833e+06	1.97599e+06	0.82735	Protein TBF1 OS=Saccharomyces cerevisiae (strain ATCC 204508 / S288c) GN=TBF1 PE=1 SV=2
P19524	MYO2 (P19524)	0.279044	0.0698876	3.93469e+06	3.25362e+06	0.826907	Myosin-2 OS=Saccharomyces cerevisiae (strain ATCC 204508 / S288c) GN=MYO2 PE=1 SV=1
P47079	CCT8 (P47079)	0.00119176	0.000667787	1.67391e+07	1.38359e+07	0.826563	T-complex protein 1 subunit theta OS=Saccharomyces cerevisiae (strain ATCC 204508 / S288c) GN=CCT8 PE=1 SV=1
Q12314	YOR021C (Q12314)	0.0478766	0.0156856	5.07078e+06	4.19042e+06	0.826386	Protein arginine N-methyltransferase SFM1 OS=Saccharomyces cerevisiae (strain ATCC 204508 / S288c) GN=SFM1 PE=1 SV=1
P20459	SUI2 (P20459)	0.00012812	0.000100967	1.34968e+07	1.1153e+07	0.826347	Eukaryotic translation initiation factor 2 subunit alpha OS=Saccharomyces cerevisiae (strain ATCC 204508 / S288c) GN=SUI2 PE=1 SV=1
P00549	CDC19 (P00549)	0.000190406	0.00014013	1.57619e+09	1.30239e+09	0.82629	Pyruvate kinase 1 OS=Saccharomyces cerevisiae (strain ATCC 204508 / S288c) GN=CDC19 PE=1 SV=2
Q02336	ADA2 (Q02336)	0.393368	0.093654	488090	403023	0.825715	Transcriptional adapter 2 OS=Saccharomyces cerevisiae (strain ATCC 204508 / S288c) GN=ADA2 PE=1 SV=1
[truncated: 580 more rows]
