# Supplementary material for: Proteomic analysis of dietary restriction in yeast reveals a role for Hsp26 in replicative lifespan extension
Source: Biochem J. 2021 Dec 16;478(24):4153–67. doi: 10.1042/BCJ20210432 (PMC8786290; doi:10.1042/BCJ20210432)
Supplement: Supplementary Table S3 [file BCJ-478-4153-s4.pdf]

## Sheet: 1.5x DR inc (Bio process)
Analysis Type:	PANTHER Overrepresentation Test (Released 20210224)
Annotation Version and Release Date:	GO Ontology database DOI: 10.5281/zenodo.4437524 Released 2021-01-01
Analyzed List:	1.5 fold increase under DR.txt (Saccharomyces cerevisiae)
Reference List:	Reference list 2.txt (Saccharomyces cerevisiae)
Test Type:	FISHER
Correction:	FDR
GO biological process complete	Reference list 2.txt - REFLIST (2407)	1.5 fold increase under DR.txt (506)	1.5 fold increase under DR.txt (expected)	1.5 fold increase under DR.txt (over/under)	1.5 fold increase under DR.txt (fold Enrichment)	1.5 fold increase under DR.txt (raw P-value)	1.5 fold increase under DR.txt (FDR)
respiratory electron transport chain (GO:0022904)	23	23	4.84	+	4.76	3.21e-07	3.93e-05
mitochondrial electron transport, ubiquinol to cytochrome c (GO:0006122)	9	9	1.89	+	4.76	0.00148	0.0485
oxidative phosphorylation (GO:0006119)	24	24	5.05	+	4.76	1.76e-07	2.22e-05
mitochondrial ATP synthesis coupled electron transport (GO:0042775)	21	21	4.41	+	4.76	1.06e-06	0.000117
ATP synthesis coupled electron transport (GO:0042773)	21	21	4.41	+	4.76	1.06e-06	0.000114
ATP biosynthetic process (GO:0006754)	15	14	3.15	+	4.44	0.000116	0.00629
ATP synthesis coupled proton transport (GO:0015986)	15	14	3.15	+	4.44	0.000116	0.00621
energy coupled proton transport, down electrochemical gradient (GO:0015985)	15	14	3.15	+	4.44	0.000116	0.00614
mitochondrial respiratory chain complex assembly (GO:0033108)	14	13	2.94	+	4.42	0.000211	0.0101
cytochrome complex assembly (GO:0017004)	11	10	2.31	+	4.32	0.0013	0.0432
cellular respiration (GO:0045333)	53	48	11.14	+	4.31	9.58e-13	2.57e-10
aerobic respiration (GO:0009060)	49	44	10.3	+	4.27	1.11e-11	2.26e-09
mitochondrial translation (GO:0032543)	56	50	11.77	+	4.25	4.46e-13	1.28e-10
electron transport chain (GO:0022900)	33	29	6.94	+	4.18	5.92e-08	8.2e-06
tricarboxylic acid cycle (GO:0006099)	24	20	5.05	+	3.96	1.24e-05	0.00106
energy derivation by oxidation of organic compounds (GO:0015980)	71	59	14.93	+	3.95	2.53e-14	1.21e-11
mitochondrial gene expression (GO:0140053)	62	51	13.03	+	3.91	2.21e-12	5.28e-10
inner mitochondrial membrane organization (GO:0007007)	16	13	3.36	+	3.86	0.000509	0.0197
purine nucleoside triphosphate biosynthetic process (GO:0009145)	19	15	3.99	+	3.76	0.000235	0.0111
purine ribonucleoside triphosphate biosynthetic process (GO:0009206)	19	15	3.99	+	3.76	0.000235	0.011
purine ribonucleoside triphosphate metabolic process (GO:0009205)	19	15	3.99	+	3.76	0.000235	0.0108
purine nucleoside triphosphate metabolic process (GO:0009144)	21	15	4.41	+	3.4	0.0005	0.0195
generation of precursor metabolites and energy (GO:0006091)	120	82	25.23	+	3.25	6.11e-16	4.37e-13
ATP metabolic process (GO:0046034)	63	43	13.24	+	3.25	9.05e-09	1.55e-06
mitochondrial membrane organization (GO:0007006)	24	16	5.05	+	3.17	0.000565	0.0213
mitochondrial transmembrane transport (GO:1990542)	33	21	6.94	+	3.03	0.000158	0.00799
mitochondrion organization (GO:0007005)	125	77	26.28	+	2.93	2.95e-13	9.75e-11
protein targeting to mitochondrion (GO:0006626)	41	25	8.62	+	2.9	5.22e-05	0.00345
protein localization to mitochondrion (GO:0070585)	43	26	9.04	+	2.88	6.44e-05	0.00401
establishment of protein localization to mitochondrion (GO:0072655)	43	26	9.04	+	2.88	6.44e-05	0.00395
proton transmembrane transport (GO:1902600)	47	27	9.88	+	2.73	6.38e-05	0.00403
mitochondrial transport (GO:0006839)	56	32	11.77	+	2.72	1.95e-05	0.00158
cellular carbohydrate metabolic process (GO:0044262)	73	36	15.35	+	2.35	4.83e-05	0.00329
cellular response to oxidative stress (GO:0034599)	69	32	14.51	+	2.21	0.000404	0.0165
inorganic cation transmembrane transport (GO:0098662)	67	31	14.08	+	2.2	0.00056	0.0213
response to oxidative stress (GO:0006979)	77	35	16.19	+	2.16	0.000294	0.0131
inorganic ion transmembrane transport (GO:0098660)	72	32	15.14	+	2.11	0.000556	0.0213
carbohydrate metabolic process (GO:0005975)	135	59	28.38	+	2.08	4.71e-06	0.00045
monocarboxylic acid metabolic process (GO:0032787)	96	41	20.18	+	2.03	0.00019	0.00928
cation transmembrane transport (GO:0098655)	80	34	16.82	+	2.02	0.000892	0.0314
cation transport (GO:0006812)	94	38	19.76	+	1.92	0.000883	0.0314
ion transmembrane transport (GO:0034220)	163	64	34.27	+	1.87	2.31e-05	0.00177
transmembrane transport (GO:0055085)	174	65	36.58	+	1.78	7.73e-05	0.00437
phosphorylation (GO:0016310)	154	54	32.37	+	1.67	0.00118	0.0402
phosphate-containing compound metabolic process (GO:0006796)	369	108	77.57	+	1.39	0.00119	0.0401
small molecule metabolic process (GO:0044281)	441	129	92.71	+	1.39	0.000338	0.0147
organic substance metabolic process (GO:0071704)	1625	301	341.61	-	0.88	0.000641	0.0237
nitrogen compound metabolic process (GO:0006807)	1413	226	297.04	-	0.76	9.56e-09	1.58e-06
cellular macromolecule metabolic process (GO:0044260)	956	144	200.97	-	0.72	1.57e-06	0.000165
cellular nitrogen compound metabolic process (GO:0034641)	971	146	204.12	-	0.72	1.02e-06	0.000115
cellular component organization or biogenesis (GO:0071840)	1083	159	227.67	-	0.7	1.56e-08	2.48e-06
cellular localization (GO:0051641)	499	73	104.9	-	0.7	0.00108	0.0373
macromolecule metabolic process (GO:0043170)	1153	168	242.38	-	0.69	1.31e-09	2.45e-07
protein localization (GO:0008104)	447	62	93.97	-	0.66	0.000497	0.0196
regulation of macromolecule biosynthetic process (GO:0010556)	360	49	75.68	-	0.65	0.00151	0.0488
regulation of gene expression (GO:0010468)	390	53	81.99	-	0.65	0.000833	0.0298
macromolecule localization (GO:0033036)	489	66	102.8	-	0.64	0.000108	0.00597
regulation of cellular macromolecule biosynthetic process (GO:2000112)	357	48	75.05	-	0.64	0.00142	0.0469
cellular protein localization (GO:0034613)	380	51	79.88	-	0.64	0.000729	0.0268
cellular macromolecule localization (GO:0070727)	394	52	82.83	-	0.63	0.000399	0.0166
gene expression (GO:0010467)	683	88	143.58	-	0.61	1.69e-07	2.2e-05
protein-containing complex subunit organization (GO:0043933)	382	43	80.3	-	0.54	8.44e-06	0.000771
heterocycle metabolic process (GO:0046483)	775	84	162.92	-	0.52	4.4e-13	1.35e-10
organic cyclic compound metabolic process (GO:1901360)	815	88	171.33	-	0.51	3.88e-14	1.67e-11
macromolecule modification (GO:0043412)	413	44	86.82	-	0.51	5.72e-07	6.64e-05
cellular aromatic compound metabolic process (GO:0006725)	773	81	162.5	-	0.5	5.09e-14	1.99e-11
nucleobase-containing compound metabolic process (GO:0006139)	729	75	153.25	-	0.49	1.46e-13	5.21e-11
negative regulation of gene expression (GO:0010629)	185	19	38.89	-	0.49	0.00106	0.037
cellular component biogenesis (GO:0044085)	628	63	132.02	-	0.48	5.41e-12	1.16e-09
chromosome organization (GO:0051276)	223	21	46.88	-	0.45	6.47e-05	0.00391
chromatin organization (GO:0006325)	161	14	33.85	-	0.41	0.000415	0.0168
cellular response to DNA damage stimulus (GO:0006974)	124	9	26.07	-	0.35	0.000397	0.0167
DNA metabolic process (GO:0006259)	150	10	31.53	-	0.32	3.65e-05	0.00257
nucleic acid transport (GO:0050657)	124	8	26.07	-	0.31	0.000144	0.00735
protein-containing complex localization (GO:0031503)	109	7	22.91	-	0.31	0.000401	0.0166
methylation (GO:0032259)	111	7	23.33	-	0.3	0.000284	0.013
nucleic acid phosphodiester bond hydrolysis (GO:0090305)	113	7	23.75	-	0.29	0.000292	0.0132
nucleic acid metabolic process (GO:0090304)	580	35	121.93	-	0.29	3.47e-21	1.49e-17
RNA metabolic process (GO:0016070)	489	28	102.8	-	0.27	2.45e-18	5.26e-15
establishment of RNA localization (GO:0051236)	123	7	25.86	-	0.27	7.09e-05	0.00423
RNA transport (GO:0050658)	123	7	25.86	-	0.27	7.09e-05	0.00417
RNA localization (GO:0006403)	141	8	29.64	-	0.27	1.19e-05	0.00104
DNA repair (GO:0006281)	106	6	22.28	-	0.27	0.00019	0.00918
transcription, DNA-templated (GO:0006351)	129	7	27.12	-	0.26	2.29e-05	0.00182
nucleic acid-templated transcription (GO:0097659)	129	7	27.12	-	0.26	2.29e-05	0.00179
RNA biosynthetic process (GO:0032774)	131	7	27.54	-	0.25	1.59e-05	0.00134
ribonucleoprotein complex assembly (GO:0022618)	102	5	21.44	-	0.23	0.000123	0.00646
ribonucleoprotein complex subunit organization (GO:0071826)	107	5	22.49	-	0.22	5.83e-05	0.0038
protein-DNA complex subunit organization (GO:0071824)	86	4	18.08	-	0.22	0.00033	0.0144
nuclear transport (GO:0051169)	131	6	27.54	-	0.22	4.54e-06	0.000454
nucleocytoplasmic transport (GO:0006913)	131	6	27.54	-	0.22	4.54e-06	0.000444
ribonucleoprotein complex export from nucleus (GO:0071426)	92	4	19.34	-	0.21	0.00016	0.00798
ribonucleoprotein complex localization (GO:0071166)	92	4	19.34	-	0.21	0.00016	0.00789
protein export from nucleus (GO:0006611)	93	4	19.55	-	0.2	0.000105	0.00584
RNA export from nucleus (GO:0006405)	95	4	19.97	-	0.2	7.13e-05	0.00414
nuclear export (GO:0051168)	96	4	20.18	-	0.2	7.16e-05	0.0041
RNA processing (GO:0006396)	318	13	66.85	-	0.19	6.06e-15	3.25e-12
macromolecule methylation (GO:0043414)	99	4	20.81	-	0.19	4.94e-05	0.00332
cellular component disassembly (GO:0022411)	153	6	32.16	-	0.19	1.32e-07	1.78e-05
tRNA metabolic process (GO:0006399)	108	4	22.7	-	0.18	1e-05	0.000897
ribosomal small subunit biogenesis (GO:0042274)	112	4	23.54	-	0.17	4.51e-06	0.000461
ribonucleoprotein complex biogenesis (GO:0022613)	328	11	68.95	-	0.16	4.88e-17	6.99e-14
ncRNA metabolic process (GO:0034660)	306	10	64.33	-	0.16	3.46e-16	3.71e-13
transcription by RNA polymerase II (GO:0006366)	96	3	20.18	-	0.15	1.76e-05	0.00146
ribosome biogenesis (GO:0042254)	291	9	61.17	-	0.15	9.89e-16	6.07e-13
rRNA modification (GO:0000154)	65	2	13.66	-	0.15	0.000477	0.0191
chromatin assembly or disassembly (GO:0006333)	66	2	13.87	-	0.14	0.000492	0.0196
RNA modification (GO:0009451)	116	3	24.39	-	0.12	4.12e-07	4.92e-05
ncRNA processing (GO:0034470)	273	7	57.39	-	0.12	4.89e-16	4.2e-13
RNA methylation (GO:0001510)	79	2	16.61	-	0.12	4.07e-05	0.00282
maturation of SSU-rRNA from tricistronic rRNA transcript (SSU-rRNA, 5.8S rRNA, LSU-rRNA) (GO:0000462)	81	2	17.03	-	0.12	2.71e-05	0.00194
rRNA processing (GO:0006364)	205	5	43.1	-	0.12	2.49e-12	5.62e-10
rRNA metabolic process (GO:0016072)	211	5	44.36	-	0.11	1.02e-12	2.59e-10
maturation of SSU-rRNA (GO:0030490)	90	2	18.92	-	0.11	7.92e-06	0.000739
nucleosome organization (GO:0034728)	49	1	10.3	-	0.1	0.00115	0.0396
protein import into nucleus (GO:0006606)	51	1	10.72	-	0.09	0.00122	0.0409
tRNA modification (GO:0006400)	53	1	11.14	-	0.09	0.00078	0.0284
protein localization to nucleus (GO:0034504)	53	1	11.14	-	0.09	0.00078	0.0282
import into nucleus (GO:0051170)	56	1	11.77	-	0.08	0.000324	0.0144
cleavage involved in rRNA processing (GO:0000469)	61	1	12.82	-	0.08	0.000137	0.00711
maturation of 5.8S rRNA from tricistronic rRNA transcript (SSU-rRNA, 5.8S rRNA, LSU-rRNA) (GO:0000466)	71	1	14.93	-	0.07	2.45e-05	0.00185
maturation of 5.8S rRNA (GO:0000460)	71	1	14.93	-	0.07	2.45e-05	0.00181
tRNA processing (GO:0008033)	72	1	15.14	-	0.07	2.55e-05	0.00186
cellular protein complex disassembly (GO:0043624)	107	1	22.49	-	0.04	3.37e-08	4.83e-06
cytoplasmic translation (GO:0002181)	116	1	24.39	-	0.04	5.51e-09	9.86e-07
protein-containing complex disassembly (GO:0032984)	127	1	26.7	-	0.04	5.74e-10	1.12e-07
rRNA-containing ribonucleoprotein complex export from nucleus (GO:0071428)	52	0	10.93	-	< 0.01	6.32e-05	0.00405
translational termination (GO:0006415)	94	0	19.76	-	< 0.01	1.7e-08	2.61e-06
maturation of LSU-rRNA (GO:0000470)	44	0	9.25	-	< 0.01	0.000394	0.0167
maturation of LSU-rRNA from tricistronic rRNA transcript (SSU-rRNA, 5.8S rRNA, LSU-rRNA) (GO:0000463)	36	0	7.57	-	< 0.01	0.00149	0.0486
DNA-templated transcription, termination (GO:0006353)	42	0	8.83	-	< 0.01	0.000633	0.0236
ribosomal large subunit biogenesis (GO:0042273)	94	0	19.76	-	< 0.01	1.7e-08	2.52e-06
ribosomal subunit export from nucleus (GO:0000054)	43	0	9.04	-	< 0.01	0.000384	0.0165

## Sheet: 1.5x DR inc (cell component)
Analysis Type:	PANTHER Overrepresentation Test (Released 20210224)
Annotation Version and Release Date:	GO Ontology database DOI: 10.5281/zenodo.4437524 Released 2021-01-01
Analyzed List:	1.5 fold increase under DR.txt (Saccharomyces cerevisiae)
Reference List:	Reference list 2.txt (Saccharomyces cerevisiae)
Test Type:	FISHER
Correction:	FDR
GO cellular component complete	Reference list 2.txt - REFLIST (2407)	1.5 fold increase under DR.txt (506)	1.5 fold increase under DR.txt (expected)	1.5 fold increase under DR.txt (over/under)	1.5 fold increase under DR.txt (fold Enrichment)	1.5 fold increase under DR.txt (raw P-value)	1.5 fold increase under DR.txt (FDR)
mitochondrial proton-transporting ATP synthase complex (GO:0005753)	14	14	2.94	+	4.76	7.1e-05	0.0016
respiratory chain complex (GO:0098803)	20	20	4.2	+	4.76	1.94e-06	5e-05
proton-transporting ATP synthase complex (GO:0045259)	14	14	2.94	+	4.76	7.1e-05	0.00156
tricarboxylic acid cycle enzyme complex (GO:0045239)	9	9	1.89	+	4.76	0.00148	0.0171
organellar large ribosomal subunit (GO:0000315)	25	25	5.26	+	4.76	9.66e-08	3.69e-06
cytochrome complex (GO:0070069)	16	16	3.36	+	4.76	2.13e-05	0.000493
mitochondrial large ribosomal subunit (GO:0005762)	25	25	5.26	+	4.76	9.66e-08	3.53e-06
mitochondrial respiratory chain complex IV (GO:0005751)	8	8	1.68	+	4.76	0.00274	0.0301
mitochondrial respiratory chain complex III (GO:0005750)	8	8	1.68	+	4.76	0.00274	0.0297
mitochondrial proton-transporting ATP synthase complex, coupling factor F(o) (GO:0000276)	9	9	1.89	+	4.76	0.00148	0.0169
respiratory chain complex IV (GO:0045277)	8	8	1.68	+	4.76	0.00274	0.0294
respiratory chain complex III (GO:0045275)	8	8	1.68	+	4.76	0.00274	0.029
proton-transporting ATP synthase complex, coupling factor F(o) (GO:0045263)	9	9	1.89	+	4.76	0.00148	0.0167
organellar ribosome (GO:0000313)	49	48	10.3	+	4.66	1.37e-13	1e-11
mitochondrial ribosome (GO:0005761)	49	48	10.3	+	4.66	1.37e-13	9.25e-12
respirasome (GO:0070469)	25	24	5.26	+	4.57	2.9e-07	9.09e-06
organellar small ribosomal subunit (GO:0000314)	22	21	4.62	+	4.54	1.75e-06	4.95e-05
mitochondrial small ribosomal subunit (GO:0005763)	22	21	4.62	+	4.54	1.75e-06	4.79e-05
mitochondrial respirasome (GO:0005746)	22	21	4.62	+	4.54	1.75e-06	4.65e-05
inner mitochondrial membrane protein complex (GO:0098800)	50	45	10.51	+	4.28	6.01e-12	3.3e-10
mitochondrial protein-containing complex (GO:0098798)	122	108	25.65	+	4.21	9.6e-28	4.22e-25
integral component of mitochondrial inner membrane (GO:0031305)	19	16	3.99	+	4.01	8.6e-05	0.00184
intrinsic component of mitochondrial inner membrane (GO:0031304)	20	16	4.2	+	3.81	0.00013	0.00254
integral component of mitochondrial membrane (GO:0032592)	38	30	7.99	+	3.76	1.79e-07	6.03e-06
intrinsic component of mitochondrial membrane (GO:0098573)	39	30	8.2	+	3.66	2.65e-07	8.63e-06
mitochondrial inner membrane (GO:0005743)	114	86	23.97	+	3.59	8.48e-19	1.06e-16
integral component of mitochondrial outer membrane (GO:0031307)	18	13	3.78	+	3.44	0.0011	0.0138
intrinsic component of mitochondrial outer membrane (GO:0031306)	18	13	3.78	+	3.44	0.0011	0.0136
mitochondrial matrix (GO:0005759)	132	95	27.75	+	3.42	1.12e-19	1.64e-17
organelle inner membrane (GO:0019866)	123	86	25.86	+	3.33	2.65e-17	2.91e-15
mitochondrial nucleoid (GO:0042645)	22	15	4.62	+	3.24	0.000709	0.00989
nucleoid (GO:0009295)	22	15	4.62	+	3.24	0.000709	0.00973
mitochondrial intermembrane space (GO:0005758)	59	40	12.4	+	3.23	3.57e-08	1.42e-06
organelle envelope lumen (GO:0031970)	63	40	13.24	+	3.02	1.62e-07	5.7e-06
oxidoreductase complex (GO:1990204)	33	20	6.94	+	2.88	0.000336	0.00556
mitochondrial membrane (GO:0031966)	194	117	40.78	+	2.87	8.51e-20	1.49e-17
mitochondrial envelope (GO:0005740)	224	134	47.09	+	2.85	1.14e-22	3.33e-20
proton-transporting two-sector ATPase complex (GO:0016469)	25	14	5.26	+	2.66	0.00468	0.0442
microbody (GO:0042579)	34	19	7.15	+	2.66	0.00134	0.0159
peroxisome (GO:0005777)	34	19	7.15	+	2.66	0.00134	0.0157
mitochondrion (GO:0005739)	589	270	123.82	+	2.18	1.21e-35	1.06e-32
envelope (GO:0031975)	308	140	64.75	+	2.16	2.38e-15	2.33e-13
organelle envelope (GO:0031967)	308	140	64.75	+	2.16	2.38e-15	2.09e-13
integral component of organelle membrane (GO:0031301)	90	39	18.92	+	2.06	0.000299	0.00525
intrinsic component of organelle membrane (GO:0031300)	93	39	19.55	+	1.99	0.000375	0.00598
outer membrane (GO:0019867)	73	30	15.35	+	1.95	0.00319	0.0329
organelle outer membrane (GO:0031968)	72	29	15.14	+	1.92	0.00452	0.0436
membrane protein complex (GO:0098796)	182	60	38.26	+	1.57	0.00247	0.0274
organelle membrane (GO:0031090)	573	157	120.46	+	1.3	0.000856	0.0111
cytoplasm (GO:0005737)	2046	479	430.11	+	1.11	3.63e-10	1.68e-08
intracellular membrane-bounded organelle (GO:0043231)	1894	426	398.16	+	1.07	0.00515	0.0481
membrane-bounded organelle (GO:0043227)	1921	432	403.83	+	1.07	0.00351	0.0358
protein-containing complex (GO:0032991)	1103	171	231.87	-	0.74	6.08e-07	1.84e-05
intracellular non-membrane-bounded organelle (GO:0043232)	758	110	159.35	-	0.69	8.82e-06	0.000221
non-membrane-bounded organelle (GO:0043228)	758	110	159.35	-	0.69	8.82e-06	0.000215
catalytic complex (GO:1902494)	351	46	73.79	-	0.62	0.000788	0.0105
nucleus (GO:0005634)	1056	134	221.99	-	0.6	1.87e-13	1.17e-11
endoplasmic reticulum (GO:0005783)	317	40	66.64	-	0.6	0.000763	0.0103
chromosome (GO:0005694)	177	20	37.21	-	0.54	0.00458	0.0437
endomembrane system (GO:0012505)	535	59	112.47	-	0.52	2e-08	8.77e-07
organelle subcompartment (GO:0031984)	267	28	56.13	-	0.5	9.03e-05	0.00184
endoplasmic reticulum subcompartment (GO:0098827)	189	19	39.73	-	0.48	0.000816	0.0107
endoplasmic reticulum membrane (GO:0005789)	184	18	38.68	-	0.47	0.000688	0.0099
nuclear outer membrane-endoplasmic reticulum membrane network (GO:0042175)	195	19	40.99	-	0.46	0.000344	0.00559
Golgi apparatus (GO:0005794)	159	15	33.43	-	0.45	0.000924	0.0118
site of polarized growth (GO:0030427)	137	12	28.8	-	0.42	0.0012	0.0146
cellular bud (GO:0005933)	131	11	27.54	-	0.4	0.00132	0.0159
transferase complex (GO:1990234)	174	14	36.58	-	0.38	8.76e-05	0.00183
chromatin (GO:0000785)	91	7	19.13	-	0.37	0.00421	0.0415
nuclear envelope (GO:0005635)	85	6	17.87	-	0.34	0.00444	0.0433
intracellular protein-containing complex (GO:0140535)	246	16	51.71	-	0.31	3.06e-08	1.28e-06
nuclear protein-containing complex (GO:0140513)	302	15	63.49	-	0.24	1.84e-12	1.08e-10
transferase complex, transferring phosphorus-containing groups (GO:0061695)	81	4	17.03	-	0.23	0.000697	0.00987
peptidase complex (GO:1905368)	61	3	12.82	-	0.23	0.00405	0.0404
cell pole (GO:0060187)	74	3	15.56	-	0.19	0.000619	0.00921
cell tip (GO:0051286)	74	3	15.56	-	0.19	0.000619	0.00906
plasma membrane bounded cell projection (GO:0120025)	79	3	16.61	-	0.18	0.000286	0.00513
cell projection (GO:0042995)	80	3	16.82	-	0.18	0.000187	0.00357
nuclear lumen (GO:0031981)	383	12	80.51	-	0.15	9.73e-21	2.14e-18
nucleoplasm (GO:0005654)	193	6	40.57	-	0.15	1.82e-10	8.89e-09
mating projection tip (GO:0043332)	70	2	14.72	-	0.14	0.000212	0.00396
mating projection (GO:0005937)	76	2	15.98	-	0.13	9.86e-05	0.00197
endopeptidase complex (GO:1905369)	42	1	8.83	-	0.11	0.00404	0.0408
small-subunit processome (GO:0032040)	46	1	9.67	-	0.1	0.00277	0.029
cytosolic ribosome (GO:0022626)	102	2	21.44	-	0.09	9.53e-07	2.79e-05
cytosolic large ribosomal subunit (GO:0022625)	55	1	11.56	-	0.09	0.000501	0.00786
nuclear DNA-directed RNA polymerase complex (GO:0055029)	55	1	11.56	-	0.09	0.000501	0.00772
DNA-directed RNA polymerase complex (GO:0000428)	56	1	11.77	-	0.08	0.000324	0.00558
RNA polymerase complex (GO:0030880)	56	1	11.77	-	0.08	0.000324	0.00548
90S preribosome (GO:0030686)	77	1	16.19	-	0.06	1.09e-05	0.00026
nucleolus (GO:0005730)	200	2	42.04	-	0.05	9.97e-15	7.96e-13
preribosome (GO:0030684)	138	1	29.01	-	0.03	9.6e-11	4.96e-09
cytosolic small ribosomal subunit (GO:0022627)	41	0	8.62	-	< 0.01	0.000605	0.00916
preribosome, large subunit precursor (GO:0030687)	47	0	9.88	-	< 0.01	0.000264	0.00483

## Sheet: 1.5x DR inc (mol function)
Analysis Type:	PANTHER Overrepresentation Test (Released 20210224)
Annotation Version and Release Date:	GO Ontology database DOI: 10.5281/zenodo.4437524 Released 2021-01-01
Analyzed List:	1.5 fold increase under DR.txt (Saccharomyces cerevisiae)
Reference List:	Reference list 2.txt (Saccharomyces cerevisiae)
Test Type:	FISHER
Correction:	FDR
GO molecular function complete	Reference list 2.txt - REFLIST (2407)	1.5 fold increase under DR.txt (506)	1.5 fold increase under DR.txt (expected)	1.5 fold increase under DR.txt (over/under)	1.5 fold increase under DR.txt (fold Enrichment)	1.5 fold increase under DR.txt (raw P-value)	1.5 fold increase under DR.txt (FDR)
electron transfer activity (GO:0009055)	30	26	6.31	+	4.12	3.53e-07	0.000349
proton transmembrane transporter activity (GO:0015078)	46	26	9.67	+	2.69	0.000105	0.0346
oxidoreductase activity (GO:0016491)	217	92	45.62	+	2.02	1.13e-08	2.23e-05
nucleic acid binding (GO:0003676)	586	77	123.19	-	0.63	5.01e-06	0.0033
RNA binding (GO:0003723)	407	50	85.56	-	0.58	5.08e-05	0.0251
catalytic activity, acting on RNA (GO:0140098)	152	11	31.95	-	0.34	7.12e-05	0.0281

## Sheet: 3x DR inc (Bio process)
Analysis Type:	PANTHER Overrepresentation Test (Released 20210224)
Annotation Version and Release Date:	GO Ontology database DOI: 10.5281/zenodo.4437524 Released 2021-01-01
Analyzed List:	3 fold increase under DR.txt (Saccharomyces cerevisiae)
Reference List:	Reference list 2.txt (Saccharomyces cerevisiae)
Test Type:	FISHER
Correction:	FDR
GO biological process complete	Reference list 2.txt - REFLIST (2407)	3 fold increase under DR.txt (153)	3 fold increase under DR.txt (expected)	3 fold increase under DR.txt (over/under)	3 fold increase under DR.txt (fold Enrichment)	3 fold increase under DR.txt (raw P-value)	3 fold increase under DR.txt (FDR)
mitochondrial electron transport, succinate to ubiquinone (GO:0006121)	4	4	0.25	+	15.73	0.000711	0.0257
mitochondrial electron transport, ubiquinol to cytochrome c (GO:0006122)	9	8	0.57	+	13.98	2.08e-06	0.000176
oxidative phosphorylation (GO:0006119)	24	20	1.53	+	13.11	5.11e-14	4.39e-11
mitochondrial ATP synthesis coupled electron transport (GO:0042775)	21	17	1.33	+	12.74	6.42e-12	3.06e-09
ATP synthesis coupled electron transport (GO:0042773)	21	17	1.33	+	12.74	6.42e-12	2.76e-09
oligosaccharide catabolic process (GO:0009313)	5	4	0.32	+	12.59	0.00122	0.0394
mitochondrial respiratory chain complex assembly (GO:0033108)	14	11	0.89	+	12.36	5.26e-08	1.03e-05
respiratory electron transport chain (GO:0022904)	23	18	1.46	+	12.31	2.18e-12	1.34e-09
ATP biosynthetic process (GO:0006754)	15	11	0.95	+	11.54	8.65e-08	1.43e-05
ATP synthesis coupled proton transport (GO:0015986)	15	11	0.95	+	11.54	8.65e-08	1.38e-05
energy coupled proton transport, down electrochemical gradient (GO:0015985)	15	11	0.95	+	11.54	8.65e-08	1.33e-05
cytochrome complex assembly (GO:0017004)	11	8	0.7	+	11.44	5.85e-06	0.000418
respiratory chain complex IV assembly (GO:0008535)	7	5	0.44	+	11.24	0.000402	0.0168
mitochondrial cytochrome c oxidase assembly (GO:0033617)	7	5	0.44	+	11.24	0.000402	0.0166
hexose transmembrane transport (GO:0008645)	9	6	0.57	+	10.49	0.000132	0.00691
carbohydrate transmembrane transport (GO:0034219)	9	6	0.57	+	10.49	0.000132	0.00683
carbohydrate phosphorylation (GO:0046835)	9	6	0.57	+	10.49	0.000132	0.00675
monosaccharide transmembrane transport (GO:0015749)	9	6	0.57	+	10.49	0.000132	0.00667
glucose transmembrane transport (GO:1904659)	9	6	0.57	+	10.49	0.000132	0.00659
fructose transmembrane transport (GO:0015755)	8	5	0.51	+	9.83	0.000622	0.0236
mitochondrial electron transport, cytochrome c to oxygen (GO:0006123)	8	5	0.51	+	9.83	0.000622	0.0234
aerobic electron transport chain (GO:0019646)	8	5	0.51	+	9.83	0.000622	0.0232
electron transport chain (GO:0022900)	33	20	2.1	+	9.53	3.69e-12	1.98e-09
carbohydrate transport (GO:0008643)	10	6	0.64	+	9.44	0.000201	0.00958
purine nucleoside triphosphate biosynthetic process (GO:0009145)	19	11	1.21	+	9.11	4.96e-07	5.92e-05
purine ribonucleoside triphosphate biosynthetic process (GO:0009206)	19	11	1.21	+	9.11	4.96e-07	5.76e-05
purine ribonucleoside triphosphate metabolic process (GO:0009205)	19	11	1.21	+	9.11	4.96e-07	5.61e-05
purine nucleoside triphosphate metabolic process (GO:0009144)	21	11	1.33	+	8.24	1.06e-06	0.000101
ATP metabolic process (GO:0046034)	63	33	4	+	8.24	3.55e-18	1.53e-14
aerobic respiration (GO:0009060)	49	25	3.11	+	8.03	1.09e-13	7.83e-11
cellular respiration (GO:0045333)	53	27	3.37	+	8.01	1.02e-14	1.1e-11
cellular carbohydrate catabolic process (GO:0044275)	14	7	0.89	+	7.87	0.000136	0.0067
tricarboxylic acid cycle (GO:0006099)	24	12	1.53	+	7.87	4.87e-07	6.15e-05
energy derivation by oxidation of organic compounds (GO:0015980)	71	34	4.51	+	7.53	8.78e-18	1.26e-14
ribonucleoside triphosphate metabolic process (GO:0009199)	23	11	1.46	+	7.52	2.11e-06	0.000171
ribonucleoside triphosphate biosynthetic process (GO:0009201)	23	11	1.46	+	7.52	2.11e-06	0.000168
nucleoside triphosphate biosynthetic process (GO:0009142)	24	11	1.53	+	7.21	2.92e-06	0.000224
proton transmembrane transport (GO:1902600)	47	20	2.99	+	6.69	5.13e-10	2e-07
nucleoside triphosphate metabolic process (GO:0009141)	26	11	1.65	+	6.66	5.38e-06	0.000399
oligosaccharide metabolic process (GO:0009311)	16	6	1.02	+	5.9	0.00139	0.0431
generation of precursor metabolites and energy (GO:0006091)	120	42	7.63	+	5.51	6.73e-18	1.45e-14
monosaccharide metabolic process (GO:0005996)	36	12	2.29	+	5.24	1.44e-05	0.000912
hexose metabolic process (GO:0019318)	28	9	1.78	+	5.06	0.000225	0.0106
inorganic cation transmembrane transport (GO:0098662)	67	21	4.26	+	4.93	1.66e-08	4.76e-06
inorganic ion transmembrane transport (GO:0098660)	72	22	4.58	+	4.81	1.08e-08	3.56e-06
mitochondrial translation (GO:0032543)	56	17	3.56	+	4.78	6.34e-07	6.81e-05
cation transmembrane transport (GO:0098655)	80	22	5.09	+	4.33	5.39e-08	1.01e-05
mitochondrial gene expression (GO:0140053)	62	17	3.94	+	4.31	2.09e-06	0.000173
cellular carbohydrate metabolic process (GO:0044262)	73	20	4.64	+	4.31	2.44e-07	3.39e-05
carbohydrate catabolic process (GO:0016052)	53	14	3.37	+	4.16	2.53e-05	0.00151
cation transport (GO:0006812)	94	24	5.98	+	4.02	4.21e-08	9.52e-06
purine ribonucleotide biosynthetic process (GO:0009152)	51	12	3.24	+	3.7	0.000252	0.0114
purine ribonucleotide metabolic process (GO:0009150)	86	19	5.47	+	3.48	7.98e-06	0.000544
carbohydrate metabolic process (GO:0005975)	135	29	8.58	+	3.38	3.87e-08	9.23e-06
purine nucleotide biosynthetic process (GO:0006164)	59	12	3.75	+	3.2	0.000796	0.0278
phosphorylation (GO:0016310)	154	31	9.79	+	3.17	4.54e-08	9.28e-06
purine nucleotide metabolic process (GO:0006163)	96	19	6.1	+	3.11	3.12e-05	0.00177
ribonucleotide metabolic process (GO:0009259)	97	19	6.17	+	3.08	3.54e-05	0.00198
ribonucleotide biosynthetic process (GO:0009260)	62	12	3.94	+	3.04	0.00117	0.0379
purine-containing compound biosynthetic process (GO:0072522)	64	12	4.07	+	2.95	0.00148	0.0459
ion transmembrane transport (GO:0034220)	163	30	10.36	+	2.9	4.47e-07	5.82e-05
mitochondrion organization (GO:0007005)	125	23	7.95	+	2.89	1.22e-05	0.000779
ribose phosphate metabolic process (GO:0019693)	104	19	6.61	+	2.87	8.21e-05	0.00441
purine-containing compound metabolic process (GO:0072521)	105	19	6.67	+	2.85	9.2e-05	0.00488
monocarboxylic acid metabolic process (GO:0032787)	96	17	6.1	+	2.79	0.000278	0.0124
transmembrane transport (GO:0055085)	174	30	11.06	+	2.71	1.54e-06	0.000135
phosphate-containing compound metabolic process (GO:0006796)	369	53	23.46	+	2.26	1.43e-08	4.38e-06
phosphorus metabolic process (GO:0006793)	382	53	24.28	+	2.18	4.47e-08	9.6e-06
small molecule metabolic process (GO:0044281)	441	55	28.03	+	1.96	7.51e-07	7.67e-05
organophosphate metabolic process (GO:0019637)	225	28	14.3	+	1.96	0.00108	0.0354
cellular component organization (GO:0016043)	903	38	57.4	-	0.66	0.00135	0.0425
nitrogen compound metabolic process (GO:0006807)	1413	58	89.82	-	0.65	7.47e-07	7.82e-05
nucleobase-containing compound metabolic process (GO:0006139)	729	28	46.34	-	0.6	0.00133	0.0419
organic cyclic compound metabolic process (GO:1901360)	815	31	51.81	-	0.6	0.000375	0.0158
cellular macromolecule metabolic process (GO:0044260)	956	36	60.77	-	0.59	5.12e-05	0.00278
cellular aromatic compound metabolic process (GO:0006725)	773	29	49.14	-	0.59	0.000588	0.0226
heterocycle metabolic process (GO:0046483)	775	29	49.26	-	0.59	0.000438	0.0179
cellular component organization or biogenesis (GO:0071840)	1083	38	68.84	-	0.55	8.22e-07	8.21e-05
cellular component biogenesis (GO:0044085)	628	22	39.92	-	0.55	0.00104	0.035
gene expression (GO:0010467)	683	23	43.41	-	0.53	0.000246	0.0112
biological regulation (GO:0065007)	896	30	56.95	-	0.53	5.44e-06	0.000396
macromolecule metabolic process (GO:0043170)	1153	38	73.29	-	0.52	2.14e-08	5.73e-06
regulation of primary metabolic process (GO:0080090)	460	14	29.24	-	0.48	0.00123	0.0395
regulation of cellular metabolic process (GO:0031323)	476	14	30.26	-	0.46	0.000651	0.0241
regulation of nitrogen compound metabolic process (GO:0051171)	446	13	28.35	-	0.46	0.00103	0.0348
regulation of metabolic process (GO:0019222)	516	15	32.8	-	0.46	0.000291	0.0129
regulation of cellular process (GO:0050794)	675	19	42.91	-	0.44	8.56e-06	0.000565
regulation of biological process (GO:0050789)	721	20	45.83	-	0.44	2.23e-06	0.000174
regulation of macromolecule metabolic process (GO:0060255)	485	13	30.83	-	0.42	0.000197	0.00953
regulation of gene expression (GO:0010468)	390	9	24.79	-	0.36	0.000309	0.0134
regulation of cellular macromolecule biosynthetic process (GO:2000112)	357	8	22.69	-	0.35	0.000465	0.0183
cellular protein modification process (GO:0006464)	313	7	19.9	-	0.35	0.000979	0.0336
protein modification process (GO:0036211)	313	7	19.9	-	0.35	0.000979	0.0334
regulation of macromolecule biosynthetic process (GO:0010556)	360	8	22.88	-	0.35	0.000326	0.0139
regulation of cellular biosynthetic process (GO:0031326)	372	8	23.65	-	0.34	0.00023	0.0107
regulation of biosynthetic process (GO:0009889)	372	8	23.65	-	0.34	0.00023	0.0106
nitrogen compound transport (GO:0071705)	439	9	27.9	-	0.32	2.36e-05	0.00143
negative regulation of biological process (GO:0048519)	307	6	19.51	-	0.31	0.000499	0.0195
establishment of localization in cell (GO:0051649)	398	7	25.3	-	0.28	1.71e-05	0.00107
macromolecule modification (GO:0043412)	413	7	26.25	-	0.27	7.8e-06	0.000541
cellular localization (GO:0051641)	499	8	31.72	-	0.25	1.87e-07	2.77e-05
intracellular transport (GO:0046907)	383	6	24.35	-	0.25	7.52e-06	0.00053
macromolecule localization (GO:0033036)	489	7	31.08	-	0.23	7.55e-08	1.35e-05
RNA metabolic process (GO:0016070)	489	7	31.08	-	0.23	7.55e-08	1.3e-05
organonitrogen compound catabolic process (GO:1901565)	210	3	13.35	-	0.22	0.0013	0.0415
protein localization to organelle (GO:0033365)	217	3	13.79	-	0.22	0.000896	0.031
nucleic acid metabolic process (GO:0090304)	580	8	36.87	-	0.22	1.97e-09	7.05e-07
protein localization (GO:0008104)	447	6	28.41	-	0.21	2.7e-07	3.62e-05
protein transport (GO:0015031)	382	5	24.28	-	0.21	2.01e-06	0.000172
peptide transport (GO:0015833)	387	5	24.6	-	0.2	1.32e-06	0.000123
amide transport (GO:0042886)	391	5	24.85	-	0.2	1.33e-06	0.000122
establishment of protein localization (GO:0045184)	393	5	24.98	-	0.2	8.7e-07	8.49e-05
proteolysis (GO:0006508)	179	2	11.38	-	0.18	0.00164	0.0491
cellular protein localization (GO:0034613)	380	4	24.15	-	0.17	4.87e-07	5.98e-05
ribosome biogenesis (GO:0042254)	291	3	18.5	-	0.16	1.81e-05	0.00111
cellular macromolecule localization (GO:0070727)	394	4	25.04	-	0.16	2.01e-07	2.88e-05
intracellular protein transport (GO:0006886)	298	3	18.94	-	0.16	1.19e-05	0.000778
ncRNA metabolic process (GO:0034660)	306	3	19.45	-	0.15	4.94e-06	0.000372
ribonucleoprotein complex biogenesis (GO:0022613)	328	3	20.85	-	0.14	1.37e-06	0.000122
cell cycle process (GO:0022402)	166	1	10.55	-	0.09	0.000547	0.0212
rRNA processing (GO:0006364)	205	1	13.03	-	0.08	4.46e-05	0.00246
rRNA metabolic process (GO:0016072)	211	1	13.41	-	0.07	2.92e-05	0.0017
cellular macromolecule catabolic process (GO:0044265)	212	1	13.48	-	0.07	2.92e-05	0.00172
cell cycle (GO:0007049)	214	1	13.6	-	0.07	2.95e-05	0.00169
vesicle-mediated transport (GO:0016192)	235	1	14.94	-	0.07	8.18e-06	0.000549
ncRNA processing (GO:0034470)	273	1	17.35	-	0.06	5.64e-07	6.21e-05
RNA processing (GO:0006396)	318	1	20.21	-	0.05	3.71e-08	9.36e-06
cytoplasmic translation (GO:0002181)	116	0	7.37	-	< 0.01	0.00105	0.0348
ubiquitin-dependent protein catabolic process (GO:0006511)	112	0	7.12	-	< 0.01	0.00163	0.0492
establishment of RNA localization (GO:0051236)	123	0	7.82	-	< 0.01	0.000682	0.025
modification-dependent macromolecule catabolic process (GO:0043632)	128	0	8.14	-	< 0.01	0.000738	0.026
RNA localization (GO:0006403)	141	0	8.96	-	< 0.01	0.000311	0.0133
nuclear transport (GO:0051169)	131	0	8.33	-	< 0.01	0.000447	0.0181
RNA transport (GO:0050658)	123	0	7.82	-	< 0.01	0.000682	0.0248
protein-containing complex localization (GO:0031503)	109	0	6.93	-	< 0.01	0.00161	0.0492
regulation of organelle organization (GO:0033043)	127	0	8.07	-	< 0.01	0.000717	0.0257
nucleocytoplasmic transport (GO:0006913)	131	0	8.33	-	< 0.01	0.000447	0.0179
nucleic acid phosphodiester bond hydrolysis (GO:0090305)	113	0	7.18	-	< 0.01	0.00165	0.049
proteolysis involved in cellular protein catabolic process (GO:0051603)	131	0	8.33	-	< 0.01	0.000447	0.0178
modification-dependent protein catabolic process (GO:0019941)	114	0	7.25	-	< 0.01	0.00169	0.0498
RNA modification (GO:0009451)	116	0	7.37	-	< 0.01	0.00105	0.0346
protein catabolic process (GO:0030163)	143	0	9.09	-	< 0.01	0.000187	0.00914
protein-containing complex disassembly (GO:0032984)	127	0	8.07	-	< 0.01	0.000717	0.0255
cellular protein catabolic process (GO:0044257)	139	0	8.84	-	< 0.01	0.000296	0.013
methylation (GO:0032259)	111	0	7.06	-	< 0.01	0.00161	0.049
cytoskeleton organization (GO:0007010)	112	0	7.12	-	< 0.01	0.00163	0.0489

## Sheet: 3x DR inc (cell component)
Analysis Type:	PANTHER Overrepresentation Test (Released 20210224)
Annotation Version and Release Date:	GO Ontology database DOI: 10.5281/zenodo.4437524 Released 2021-01-01
Analyzed List:	3 fold increase under DR.txt (Saccharomyces cerevisiae)
Reference List:	Reference list 2.txt (Saccharomyces cerevisiae)
Test Type:	FISHER
Correction:	FDR
GO cellular component complete	Reference list 2.txt - REFLIST (2407)	3 fold increase under DR.txt (153)	3 fold increase under DR.txt (expected)	3 fold increase under DR.txt (over/under)	3 fold increase under DR.txt (fold Enrichment)	3 fold increase under DR.txt (raw P-value)	3 fold increase under DR.txt (FDR)
mitochondrial respiratory chain complex III (GO:0005750)	8	8	0.51	+	15.73	1.16e-06	4.64e-05
mitochondrial respiratory chain complex II, succinate dehydrogenase complex (ubiquinone) (GO:0005749)	4	4	0.25	+	15.73	0.000711	0.013
fumarate reductase complex (GO:0045283)	4	4	0.25	+	15.73	0.000711	0.0127
succinate dehydrogenase complex (GO:0045281)	4	4	0.25	+	15.73	0.000711	0.0125
respiratory chain complex III (GO:0045275)	8	8	0.51	+	15.73	1.16e-06	4.44e-05
respiratory chain complex II (GO:0045273)	4	4	0.25	+	15.73	0.000711	0.0122
succinate dehydrogenase complex (ubiquinone) (GO:0045257)	4	4	0.25	+	15.73	0.000711	0.012
mitochondrial proton-transporting ATP synthase, stator stalk (GO:0000274)	3	3	0.19	+	15.73	0.00366	0.0473
proton-transporting ATP synthase, stator stalk (GO:0045265)	3	3	0.19	+	15.73	0.00366	0.0466
respiratory chain complex (GO:0098803)	20	17	1.27	+	13.37	3.74e-12	2.73e-10
proton-transporting ATP synthase complex, catalytic core F(1) (GO:0045261)	6	5	0.38	+	13.11	0.000246	0.00527
mitochondrial respirasome (GO:0005746)	22	18	1.4	+	12.87	1.29e-12	1.03e-10
cytochrome complex (GO:0070069)	16	13	1.02	+	12.78	2.22e-09	1.39e-07
mitochondrial proton-transporting ATP synthase complex, catalytic sector F(1) (GO:0000275)	5	4	0.32	+	12.59	0.00122	0.0179
respirasome (GO:0070469)	25	20	1.59	+	12.59	8.74e-14	7.67e-12
mitochondrial proton-transporting ATP synthase complex (GO:0005753)	14	11	0.89	+	12.36	5.26e-08	2.57e-06
proton-transporting ATP synthase complex (GO:0045259)	14	11	0.89	+	12.36	5.26e-08	2.43e-06
mitochondrial proton-transporting ATP synthase complex, coupling factor F(o) (GO:0000276)	9	7	0.57	+	12.24	1.72e-05	0.000473
proton-transporting ATP synthase complex, coupling factor F(o) (GO:0045263)	9	7	0.57	+	12.24	1.72e-05	0.000459
mitochondrial respiratory chain complex IV (GO:0005751)	8	5	0.51	+	9.83	0.000622	0.0119
respiratory chain complex IV (GO:0045277)	8	5	0.51	+	9.83	0.000622	0.0116
proton-transporting two-sector ATPase complex, proton-transporting domain (GO:0033177)	12	7	0.76	+	9.18	6.51e-05	0.00155
inner mitochondrial membrane protein complex (GO:0098800)	50	29	3.18	+	9.12	6.52e-17	8.18e-15
proton-transporting two-sector ATPase complex (GO:0016469)	25	11	1.59	+	6.92	3.98e-06	0.000121
oxidoreductase complex (GO:1990204)	33	14	2.1	+	6.67	2.52e-07	1.06e-05
mitochondrial inner membrane (GO:0005743)	114	45	7.25	+	6.21	6.22e-21	2.73e-18
proton-transporting two-sector ATPase complex, catalytic domain (GO:0033178)	13	5	0.83	+	6.05	0.00324	0.0431
mitochondrial protein-containing complex (GO:0098798)	122	45	7.75	+	5.8	5.71e-20	1.67e-17
organelle inner membrane (GO:0019866)	123	45	7.82	+	5.76	7.45e-20	1.64e-17
mitochondrial intermembrane space (GO:0005758)	59	20	3.75	+	5.33	1.26e-08	6.92e-07
integral component of mitochondrial outer membrane (GO:0031307)	18	6	1.14	+	5.24	0.00226	0.0315
intrinsic component of mitochondrial outer membrane (GO:0031306)	18	6	1.14	+	5.24	0.00226	0.031
organellar large ribosomal subunit (GO:0000315)	25	8	1.59	+	5.03	0.000522	0.0104
mitochondrial large ribosomal subunit (GO:0005762)	25	8	1.59	+	5.03	0.000522	0.0102
organellar small ribosomal subunit (GO:0000314)	22	7	1.4	+	5.01	0.00121	0.0184
mitochondrial small ribosomal subunit (GO:0005763)	22	7	1.4	+	5.01	0.00121	0.0181
organelle envelope lumen (GO:0031970)	63	20	4	+	4.99	3.16e-08	1.63e-06
organellar ribosome (GO:0000313)	49	15	3.11	+	4.82	2.79e-06	9.8e-05
mitochondrial ribosome (GO:0005761)	49	15	3.11	+	4.82	2.79e-06	9.42e-05
integral component of mitochondrial membrane (GO:0032592)	38	11	2.42	+	4.55	9.79e-05	0.00226
intrinsic component of mitochondrial membrane (GO:0098573)	39	11	2.48	+	4.44	0.000119	0.00262
mitochondrial membrane (GO:0031966)	194	52	12.33	+	4.22	4.97e-18	7.27e-16
mitochondrial envelope (GO:0005740)	224	58	14.24	+	4.07	1.06e-19	1.87e-17
mitochondrial matrix (GO:0005759)	132	25	8.39	+	2.98	3.03e-06	9.87e-05
envelope (GO:0031975)	308	58	19.58	+	2.96	5.18e-14	5.69e-12
organelle envelope (GO:0031967)	308	58	19.58	+	2.96	5.18e-14	5.06e-12
mitochondrion (GO:0005739)	589	101	37.44	+	2.7	1.8e-25	1.58e-22
membrane protein complex (GO:0098796)	182	30	11.57	+	2.59	4.73e-06	0.000138
organelle membrane (GO:0031090)	573	57	36.42	+	1.56	0.000318	0.0065
cytoplasm (GO:0005737)	2046	144	130.05	+	1.11	0.00121	0.0186
intracellular non-membrane-bounded organelle (GO:0043232)	758	24	48.18	-	0.5	1.8e-05	0.000465
non-membrane-bounded organelle (GO:0043228)	758	24	48.18	-	0.5	1.8e-05	0.000451
nucleus (GO:0005634)	1056	28	67.12	-	0.42	1.1e-10	7.42e-09
endomembrane system (GO:0012505)	535	11	34.01	-	0.32	1.95e-06	7.13e-05
vesicle (GO:0031982)	163	2	10.36	-	0.19	0.00349	0.0457
chromosome (GO:0005694)	177	2	11.25	-	0.18	0.00163	0.0231
organelle subcompartment (GO:0031984)	267	3	16.97	-	0.18	5.87e-05	0.00143
endoplasmic reticulum membrane (GO:0005789)	184	2	11.7	-	0.17	0.00111	0.0173
endoplasmic reticulum subcompartment (GO:0098827)	189	2	12.01	-	0.17	0.000753	0.0125
nuclear outer membrane-endoplasmic reticulum membrane network (GO:0042175)	195	2	12.4	-	0.16	0.000781	0.0127
cellular bud (GO:0005933)	131	1	8.33	-	0.12	0.00406	0.0502
site of polarized growth (GO:0030427)	137	1	8.71	-	0.11	0.00273	0.0368
Golgi apparatus (GO:0005794)	159	1	10.11	-	0.1	0.000821	0.0131
nuclear lumen (GO:0031981)	383	2	24.35	-	0.08	6.61e-09	3.87e-07
nucleoplasm (GO:0005654)	193	1	12.27	-	0.08	0.000104	0.00235
intracellular protein-containing complex (GO:0140535)	246	1	15.64	-	0.06	3.34e-06	0.000105
nuclear protein-containing complex (GO:0140513)	302	1	19.2	-	0.05	9.12e-08	4.01e-06
cytosolic ribosome (GO:0022626)	102	0	6.48	-	< 0.01	0.00408	0.0498
preribosome (GO:0030684)	138	0	8.77	-	< 0.01	0.000292	0.00609
cell cortex (GO:0005938)	96	0	6.1	-	< 0.01	0.00375	0.047
nucleolus (GO:0005730)	200	0	12.71	-	< 0.01	5.85e-06	0.000166
cytoskeleton (GO:0005856)	112	0	7.12	-	< 0.01	0.00163	0.0234

## Sheet: 3x DR inc (mol function)
Analysis Type:	PANTHER Overrepresentation Test (Released 20210224)
Annotation Version and Release Date:	GO Ontology database DOI: 10.5281/zenodo.4437524 Released 2021-01-01
Analyzed List:	3 fold increase under DR.txt (Saccharomyces cerevisiae)
Reference List:	Reference list 2.txt (Saccharomyces cerevisiae)
Test Type:	FISHER
Correction:	FDR
GO molecular function complete	Reference list 2.txt - REFLIST (2407)	3 fold increase under DR.txt (153)	3 fold increase under DR.txt (expected)	3 fold increase under DR.txt (over/under)	3 fold increase under DR.txt (fold Enrichment)	3 fold increase under DR.txt (raw P-value)	3 fold increase under DR.txt (FDR)
succinate dehydrogenase (ubiquinone) activity (GO:0008177)	4	4	0.25	+	15.73	0.000711	0.0468
ubiquinol-cytochrome-c reductase activity (GO:0008121)	8	8	0.51	+	15.73	1.16e-06	0.000153
proton-transporting ATP synthase activity, rotational mechanism (GO:0046933)	14	11	0.89	+	12.36	5.26e-08	1.73e-05
proton channel activity (GO:0015252)	14	11	0.89	+	12.36	5.26e-08	1.48e-05
cation channel activity (GO:0005261)	15	11	0.95	+	11.54	8.65e-08	1.71e-05
ion channel activity (GO:0005216)	19	12	1.21	+	9.94	7.13e-08	1.76e-05
heme-copper terminal oxidase activity (GO:0015002)	8	5	0.51	+	9.83	0.000622	0.0472
cytochrome-c oxidase activity (GO:0004129)	8	5	0.51	+	9.83	0.000622	0.0455
oxidoreductase activity, acting on a heme group of donors, oxygen as acceptor (GO:0016676)	8	5	0.51	+	9.83	0.000622	0.0439
oxidoreductase activity, acting on a heme group of donors (GO:0016675)	8	5	0.51	+	9.83	0.000622	0.0423
electron transfer activity (GO:0009055)	30	18	1.91	+	9.44	5.49e-11	1.08e-07
solute:cation symporter activity (GO:0015294)	10	6	0.64	+	9.44	0.000201	0.0189
symporter activity (GO:0015293)	10	6	0.64	+	9.44	0.000201	0.018
passive transmembrane transporter activity (GO:0022803)	21	12	1.33	+	8.99	1.61e-07	2.9e-05
channel activity (GO:0015267)	21	12	1.33	+	8.99	1.61e-07	2.66e-05
carbohydrate kinase activity (GO:0019200)	11	6	0.7	+	8.58	0.000295	0.0243
proton transmembrane transporter activity (GO:0015078)	46	21	2.92	+	7.18	6.41e-11	6.33e-08
secondary active transmembrane transporter activity (GO:0015291)	26	10	1.65	+	6.05	2.86e-05	0.00333
inorganic cation transmembrane transporter activity (GO:0022890)	63	22	4	+	5.49	1.37e-09	6.77e-07
inorganic molecular entity transmembrane transporter activity (GO:0015318)	93	27	5.91	+	4.57	4.73e-10	3.12e-07
cation transmembrane transporter activity (GO:0008324)	76	22	4.83	+	4.55	2.47e-08	9.75e-06
active ion transmembrane transporter activity (GO:0022853)	49	12	3.11	+	3.85	0.000183	0.018
active transmembrane transporter activity (GO:0022804)	60	13	3.81	+	3.41	0.000281	0.0241
ion transmembrane transporter activity (GO:0015075)	129	27	8.2	+	3.29	1.97e-07	2.99e-05
transmembrane transporter activity (GO:0022857)	140	28	8.9	+	3.15	2.59e-07	3.66e-05
ligase activity (GO:0016874)	87	17	5.53	+	3.07	9.7e-05	0.0101
transporter activity (GO:0005215)	164	28	10.42	+	2.69	4.37e-06	0.000539
oxidoreductase activity (GO:0016491)	217	37	13.79	+	2.68	8.59e-08	1.89e-05
binding (GO:0005488)	1531	76	97.32	-	0.78	0.00073	0.0465
nucleic acid binding (GO:0003676)	586	19	37.25	-	0.51	0.000538	0.0425
protein binding (GO:0005515)	427	9	27.14	-	0.33	5.09e-05	0.00559
