# Supplementary material for: Proteomic analysis of dietary restriction in yeast reveals a role for Hsp26 in replicative lifespan extension
Source: Biochem J. 2021 Dec 16;478(24):4153–67. doi: 10.1042/BCJ20210432 (PMC8786290; doi:10.1042/BCJ20210432)
Supplement: Supplementary Table S4 [file BCJ-478-4153-s5.pdf]

## Sheet: 1.5x DR dec (Bio process)
Analysis Type:	PANTHER Overrepresentation Test (Released 20210224)
Annotation Version and Release Date:	GO Ontology database DOI: 10.5281/zenodo.4437524 Released 2021-01-01
Analyzed List:	1.5 fold decrease under DR.txt (Saccharomyces cerevisiae)
Reference List:	Reference list 2.txt (Saccharomyces cerevisiae)
Test Type:	FISHER
Correction:	FDR
GO biological process complete	Reference list 2.txt - REFLIST (2407)	1.5 fold decrease under DR.txt (217)	1.5 fold decrease under DR.txt (expected)	1.5 fold decrease under DR.txt (over/under)	1.5 fold decrease under DR.txt (fold Enrichment)	1.5 fold decrease under DR.txt (raw P-value)	1.5 fold decrease under DR.txt (FDR)
maturation of LSU-rRNA from tricistronic rRNA transcript (SSU-rRNA, 5.8S rRNA, LSU-rRNA) (GO:0000463)	36	19	3.25	+	5.85	2.41e-08	3.45e-06
purine ribonucleoside monophosphate biosynthetic process (GO:0009168)	21	11	1.89	+	5.81	2.62e-05	0.0025
purine nucleoside monophosphate biosynthetic process (GO:0009127)	21	11	1.89	+	5.81	2.62e-05	0.00244
purine ribonucleoside monophosphate metabolic process (GO:0009167)	23	11	2.07	+	5.3	5e-05	0.00447
purine nucleoside monophosphate metabolic process (GO:0009126)	23	11	2.07	+	5.3	5e-05	0.00438
maturation of LSU-rRNA (GO:0000470)	44	21	3.97	+	5.29	1.66e-08	2.46e-06
endonucleolytic cleavage in ITS1 to separate SSU-rRNA from 5.8S rRNA and LSU-rRNA from tricistronic rRNA transcript (SSU-rRNA, 5.8S rRNA, LSU-rRNA) (GO:0000447)	36	17	3.25	+	5.24	4.7e-07	5.94e-05
maturation of 5.8S rRNA from tricistronic rRNA transcript (SSU-rRNA, 5.8S rRNA, LSU-rRNA) (GO:0000466)	71	33	6.4	+	5.16	1.48e-12	4.88e-10
maturation of 5.8S rRNA (GO:0000460)	71	33	6.4	+	5.16	1.48e-12	4.53e-10
endonucleolytic cleavage of tricistronic rRNA transcript (SSU-rRNA, 5.8S rRNA, LSU-rRNA) (GO:0000479)	42	19	3.79	+	5.02	1.62e-07	2.18e-05
endonucleolytic cleavage involved in rRNA processing (GO:0000478)	42	19	3.79	+	5.02	1.62e-07	2.11e-05
rRNA 5'-end processing (GO:0000967)	31	14	2.79	+	5.01	7.62e-06	0.000862
endonucleolytic cleavage in 5'-ETS of tricistronic rRNA transcript (SSU-rRNA, 5.8S rRNA, LSU-rRNA) (GO:0000480)	29	13	2.61	+	4.97	1.74e-05	0.00178
endonucleolytic cleavage to generate mature 5'-end of SSU-rRNA from (SSU-rRNA, 5.8S rRNA, LSU-rRNA) (GO:0000472)	29	13	2.61	+	4.97	1.74e-05	0.00174
RNA 5'-end processing (GO:0000966)	32	14	2.88	+	4.85	1.02e-05	0.00112
ncRNA 5'-end processing (GO:0034471)	32	14	2.88	+	4.85	1.02e-05	0.00109
ribosomal large subunit biogenesis (GO:0042273)	94	41	8.47	+	4.84	1.03e-14	5.53e-12
rRNA methylation (GO:0031167)	59	25	5.32	+	4.7	4.45e-09	7.65e-07
ribosomal large subunit export from nucleus (GO:0000055)	26	11	2.34	+	4.69	0.00012	0.00933
rRNA modification (GO:0000154)	65	27	5.86	+	4.61	1.43e-09	2.67e-07
cleavage involved in rRNA processing (GO:0000469)	61	25	5.5	+	4.55	7.66e-09	1.18e-06
ribonucleoside monophosphate biosynthetic process (GO:0009156)	33	13	2.98	+	4.37	5.14e-05	0.00442
maturation of SSU-rRNA from tricistronic rRNA transcript (SSU-rRNA, 5.8S rRNA, LSU-rRNA) (GO:0000462)	81	31	7.3	+	4.25	3.93e-10	8.05e-08
RNA methylation (GO:0001510)	79	30	7.12	+	4.21	9.09e-10	1.77e-07
ribonucleoside monophosphate metabolic process (GO:0009161)	35	13	3.16	+	4.12	8.39e-05	0.0068
nucleoside monophosphate biosynthetic process (GO:0009124)	35	13	3.16	+	4.12	8.39e-05	0.00667
maturation of SSU-rRNA (GO:0030490)	90	33	8.11	+	4.07	2.48e-10	5.61e-08
RNA phosphodiester bond hydrolysis, endonucleolytic (GO:0090502)	55	20	4.96	+	4.03	1.26e-06	0.000154
ribosomal small subunit biogenesis (GO:0042274)	112	40	10.1	+	3.96	4.42e-12	1.19e-09
rRNA processing (GO:0006364)	205	72	18.48	+	3.9	1.03e-21	1.11e-18
nucleoside monophosphate metabolic process (GO:0009123)	40	14	3.61	+	3.88	7.54e-05	0.00623
rRNA metabolic process (GO:0016072)	211	72	19.02	+	3.79	4.2e-21	3.6e-18
RNA modification (GO:0009451)	116	38	10.46	+	3.63	1.38e-10	3.3e-08
ribosome biogenesis (GO:0042254)	291	95	26.23	+	3.62	8.79e-28	3.77e-24
macromolecule methylation (GO:0043414)	99	32	8.93	+	3.59	6.39e-09	1.02e-06
ncRNA processing (GO:0034470)	273	84	24.61	+	3.41	1.52e-22	2.18e-19
methylation (GO:0032259)	111	34	10.01	+	3.4	6.36e-09	1.05e-06
ribosomal subunit export from nucleus (GO:0000054)	43	13	3.88	+	3.35	0.000451	0.0318
ribonucleoprotein complex biogenesis (GO:0022613)	328	97	29.57	+	3.28	1.3e-25	2.8e-22
ribosome localization (GO:0033750)	44	13	3.97	+	3.28	0.000543	0.0376
rRNA-containing ribonucleoprotein complex export from nucleus (GO:0071428)	52	15	4.69	+	3.2	0.000252	0.019
RNA phosphodiester bond hydrolysis (GO:0090501)	88	25	7.93	+	3.15	2.55e-06	0.000304
ncRNA metabolic process (GO:0034660)	306	84	27.59	+	3.04	9.42e-20	6.75e-17
RNA processing (GO:0006396)	318	84	28.67	+	2.93	7.94e-19	4.87e-16
nucleic acid phosphodiester bond hydrolysis (GO:0090305)	113	27	10.19	+	2.65	1.98e-05	0.00193
RNA metabolic process (GO:0016070)	489	92	44.09	+	2.09	2.69e-12	7.7e-10
cellular component biogenesis (GO:0044085)	628	106	56.62	+	1.87	8.84e-12	2.23e-09
nucleic acid metabolic process (GO:0090304)	580	97	52.29	+	1.86	3.74e-10	8.04e-08
nucleobase-containing compound metabolic process (GO:0006139)	729	121	65.72	+	1.84	1.28e-13	5.49e-11
cellular aromatic compound metabolic process (GO:0006725)	773	126	69.69	+	1.81	8.2e-14	3.91e-11
heterocycle metabolic process (GO:0046483)	775	125	69.87	+	1.79	2.73e-13	1.06e-10
organic cyclic compound metabolic process (GO:1901360)	815	129	73.48	+	1.76	2.83e-13	1.01e-10
gene expression (GO:0010467)	683	100	61.57	+	1.62	1.57e-07	2.17e-05
cellular nitrogen compound metabolic process (GO:0034641)	971	134	87.54	+	1.53	1.65e-09	2.95e-07
nitrogen compound metabolic process (GO:0006807)	1413	154	127.39	+	1.21	0.000384	0.0275
organonitrogen compound metabolic process (GO:1901564)	995	64	89.7	-	0.71	0.000659	0.0449
cellular component organization (GO:0016043)	903	55	81.41	-	0.68	0.000299	0.0221
organelle organization (GO:0006996)	627	30	56.53	-	0.53	3.81e-05	0.00348
protein metabolic process (GO:0019538)	677	31	61.03	-	0.51	4.5e-06	0.000523
cellular protein metabolic process (GO:0044267)	634	29	57.16	-	0.51	1.31e-05	0.00137
vesicle-mediated transport (GO:0016192)	235	6	21.19	-	0.28	0.000191	0.0146
establishment of protein localization to organelle (GO:0072594)	181	4	16.32	-	0.25	0.000727	0.0488
protein localization to organelle (GO:0033365)	217	4	19.56	-	0.2	5.42e-05	0.00456
mitochondrion organization (GO:0007005)	125	1	11.27	-	0.09	0.000357	0.026

## Sheet: 1.5x DR dec (cell component)
Analysis Type:	PANTHER Overrepresentation Test (Released 20210224)
Annotation Version and Release Date:	GO Ontology database DOI: 10.5281/zenodo.4437524 Released 2021-01-01
Analyzed List:	1.5 fold decrease under DR.txt (Saccharomyces cerevisiae)
Reference List:	Reference list 2.txt (Saccharomyces cerevisiae)
Test Type:	FISHER
Correction:	FDR
GO cellular component complete	Reference list 2.txt - REFLIST (2407)	1.5 fold decrease under DR.txt (217)	1.5 fold decrease under DR.txt (expected)	1.5 fold decrease under DR.txt (over/under)	1.5 fold decrease under DR.txt (fold Enrichment)	1.5 fold decrease under DR.txt (raw P-value)	1.5 fold decrease under DR.txt (FDR)
preribosome, small subunit precursor (GO:0030688)	19	11	1.71	+	6.42	1.29e-05	0.000706
preribosome, large subunit precursor (GO:0030687)	47	23	4.24	+	5.43	2.24e-09	2.19e-07
preribosome (GO:0030684)	138	58	12.44	+	4.66	2.97e-20	1.3e-17
small-subunit processome (GO:0032040)	46	19	4.15	+	4.58	4.97e-07	3.64e-05
nucleolus (GO:0005730)	200	82	18.03	+	4.55	6.09e-29	5.35e-26
90S preribosome (GO:0030686)	77	26	6.94	+	3.75	9.55e-08	8.38e-06
nuclear lumen (GO:0031981)	383	92	34.53	+	2.66	2.81e-18	8.23e-16
ribonucleoprotein complex (GO:1990904)	333	70	30.02	+	2.33	5.23e-11	5.74e-09
nucleoplasm (GO:0005654)	193	35	17.4	+	2.01	0.000207	0.00728
intracellular organelle lumen (GO:0070013)	589	102	53.1	+	1.92	9.36e-12	1.64e-09
membrane-enclosed lumen (GO:0031974)	589	102	53.1	+	1.92	9.36e-12	1.37e-09
organelle lumen (GO:0043233)	589	102	53.1	+	1.92	9.36e-12	1.17e-09
intracellular non-membrane-bounded organelle (GO:0043232)	758	101	68.34	+	1.48	1.05e-05	0.000662
non-membrane-bounded organelle (GO:0043228)	758	101	68.34	+	1.48	1.05e-05	0.000617
nucleus (GO:0005634)	1056	133	95.2	+	1.4	1.08e-06	7.26e-05
cytoplasm (GO:0005737)	2046	136	184.45	-	0.74	3.38e-14	7.41e-12
membrane (GO:0016020)	814	45	73.39	-	0.61	5.79e-05	0.00267
mitochondrion (GO:0005739)	589	31	53.1	-	0.58	0.000584	0.0183
catalytic complex (GO:1902494)	351	14	31.64	-	0.44	0.000457	0.0154
organelle membrane (GO:0031090)	573	21	51.66	-	0.41	4.24e-07	3.39e-05
organelle subcompartment (GO:0031984)	267	9	24.07	-	0.37	0.000713	0.0216
bounding membrane of organelle (GO:0098588)	305	10	27.5	-	0.36	0.000179	0.00654
envelope (GO:0031975)	308	10	27.77	-	0.36	0.000127	0.00508
organelle envelope (GO:0031967)	308	10	27.77	-	0.36	0.000127	0.00486
membrane protein complex (GO:0098796)	182	4	16.41	-	0.24	0.000493	0.016
mitochondrial envelope (GO:0005740)	224	4	20.19	-	0.2	2.4e-05	0.00124
mitochondrial membrane (GO:0031966)	194	3	17.49	-	0.17	6.63e-05	0.00291
mitochondrial inner membrane (GO:0005743)	114	1	10.28	-	0.1	0.000792	0.0232
mitochondrial protein-containing complex (GO:0098798)	122	0	11	-	< 0.01	3.16e-05	0.00154
cytoskeleton (GO:0005856)	112	0	10.1	-	< 0.01	7.54e-05	0.00315

## Sheet: 1.5x DR dec (mol function)
Analysis Type:	PANTHER Overrepresentation Test (Released 20210224)
Annotation Version and Release Date:	GO Ontology database DOI: 10.5281/zenodo.4437524 Released 2021-01-01
Analyzed List:	1.5 fold decrease under DR.txt (Saccharomyces cerevisiae)
Reference List:	Reference list 2.txt (Saccharomyces cerevisiae)
Test Type:	FISHER
Correction:	FDR
GO molecular function complete	Reference list 2.txt - REFLIST (2407)	1.5 fold decrease under DR.txt (217)	1.5 fold decrease under DR.txt (expected)	1.5 fold decrease under DR.txt (over/under)	1.5 fold decrease under DR.txt (fold Enrichment)	1.5 fold decrease under DR.txt (raw P-value)	1.5 fold decrease under DR.txt (FDR)
snoRNA binding (GO:0030515)	26	13	2.34	+	5.55	6.94e-06	0.00457
RNA helicase activity (GO:0003724)	32	14	2.88	+	4.85	1.02e-05	0.00502
helicase activity (GO:0004386)	53	17	4.78	+	3.56	3.18e-05	0.0126
catalytic activity, acting on RNA (GO:0140098)	152	30	13.7	+	2.19	0.000137	0.0386
RNA binding (GO:0003723)	407	73	36.69	+	1.99	1.31e-08	2.58e-05
nucleic acid binding (GO:0003676)	586	86	52.83	+	1.63	2.09e-06	0.00207
heterocyclic compound binding (GO:1901363)	1016	121	91.6	+	1.32	0.000142	0.035
organic cyclic compound binding (GO:0097159)	1023	121	92.23	+	1.31	0.000192	0.0422
protein binding (GO:0005515)	427	17	38.5	-	0.44	9.17e-05	0.0302

## Sheet: 3x DR dec (Bio process)
Analysis Type:	PANTHER Overrepresentation Test (Released 20210224)
Annotation Version and Release Date:	GO Ontology database DOI: 10.5281/zenodo.4437524 Released 2021-01-01
Analyzed List:	3 fold decrease under DR.txt (Saccharomyces cerevisiae)
Reference List:	Reference list 2.txt (Saccharomyces cerevisiae)
Test Type:	FISHER
Correction:	FDR
GO biological process complete	Reference list 2.txt - REFLIST (2407)	3 fold decrease under DR.txt (12)	3 fold decrease under DR.txt (expected)	3 fold decrease under DR.txt (over/under)	3 fold decrease under DR.txt (fold Enrichment)	3 fold decrease under DR.txt (raw P-value)	3 fold decrease under DR.txt (FDR)

## Sheet: 3x DR dec (cell component)
Analysis Type:	PANTHER Overrepresentation Test (Released 20210224)
Annotation Version and Release Date:	GO Ontology database DOI: 10.5281/zenodo.4437524 Released 2021-01-01
Analyzed List:	3 fold decrease under DR.txt (Saccharomyces cerevisiae)
Reference List:	Reference list 2.txt (Saccharomyces cerevisiae)
Test Type:	FISHER
Correction:	FDR
GO cellular component complete	Reference list 2.txt - REFLIST (2407)	3 fold decrease under DR.txt (12)	3 fold decrease under DR.txt (expected)	3 fold decrease under DR.txt (over/under)	3 fold decrease under DR.txt (fold Enrichment)	3 fold decrease under DR.txt (raw P-value)	3 fold decrease under DR.txt (FDR)

## Sheet: 3x DR dec (mol function)
Analysis Type:	PANTHER Overrepresentation Test (Released 20210224)
Annotation Version and Release Date:	GO Ontology database DOI: 10.5281/zenodo.4437524 Released 2021-01-01
Analyzed List:	3 fold decrease under DR.txt (Saccharomyces cerevisiae)
Reference List:	Reference list 2.txt (Saccharomyces cerevisiae)
Test Type:	FISHER
Correction:	FDR
GO molecular function complete	Reference list 2.txt - REFLIST (2407)	3 fold decrease under DR.txt (12)	3 fold decrease under DR.txt (expected)	3 fold decrease under DR.txt (over/under)	3 fold decrease under DR.txt (fold Enrichment)	3 fold decrease under DR.txt (raw P-value)	3 fold decrease under DR.txt (FDR)
anion transmembrane transporter activity (GO:0008509)	76	5	0.38	+	13.2	2.45e-05	0.0484
